# Supplementary material for: Public perceptions of brain health: an international, online cross-sectional survey
Source: PubMed Central journal article supplement — BMJ Open. 2022 Apr 18;12(4):e057999. doi: 10.1136/bmjopen-2021-057999 (PMC9016409; doi:10.1136/bmjopen-2021-057999), 2022-04-18
Supplement: bmjopen-2021-057999.draft_revisions.pdf [file bmjopen-2021-057999.draft_revisions.pdf]

# BMJ Open

BMJ Open is committed to open peer review. As part of this commitment we make the peer review history of every article we publish publicly available.

When an article is published we post the peer reviewers' comments and the authors' responses online. We also post the versions of the paper that were used during peer review. These are the versions that the peer review comments apply to.

The versions of the paper that follow are the versions that were submitted during the peer review process. They are not the versions of record or the final published versions. They should not be cited or distributed as the published version of this manuscript.

BMJ Open is an open access journal and the full, final, typeset and author-corrected version of record of the manuscript is available on our site with no access controls, subscription charges or pay-per-view fees (<http://bmjopen.bmj.com>).

If you have any questions on BMJ Open's open peer review process please email [info.bmjopen@bmj.com](mailto:info.bmjopen@bmj.com)

# BMJ Open

## What is brain health? Perceptions of 27,590 respondents to the Lifebrain Global Brain Health Survey

|                               |                                                                                                                                                                                                                                                                                                                                                                                                                                                                                                                                                                                                                                                                                                                                                                                                                                                                                                                                                                                                                                                                                                                                                                                                                                                                                                                                                                                                                                                                                           |
|-------------------------------|-------------------------------------------------------------------------------------------------------------------------------------------------------------------------------------------------------------------------------------------------------------------------------------------------------------------------------------------------------------------------------------------------------------------------------------------------------------------------------------------------------------------------------------------------------------------------------------------------------------------------------------------------------------------------------------------------------------------------------------------------------------------------------------------------------------------------------------------------------------------------------------------------------------------------------------------------------------------------------------------------------------------------------------------------------------------------------------------------------------------------------------------------------------------------------------------------------------------------------------------------------------------------------------------------------------------------------------------------------------------------------------------------------------------------------------------------------------------------------------------|
| Journal:                      | <i>BMJ Open</i>                                                                                                                                                                                                                                                                                                                                                                                                                                                                                                                                                                                                                                                                                                                                                                                                                                                                                                                                                                                                                                                                                                                                                                                                                                                                                                                                                                                                                                                                           |
| Manuscript ID                 | bmjopen-2021-057999                                                                                                                                                                                                                                                                                                                                                                                                                                                                                                                                                                                                                                                                                                                                                                                                                                                                                                                                                                                                                                                                                                                                                                                                                                                                                                                                                                                                                                                                       |
| Article Type:                 | Original research                                                                                                                                                                                                                                                                                                                                                                                                                                                                                                                                                                                                                                                                                                                                                                                                                                                                                                                                                                                                                                                                                                                                                                                                                                                                                                                                                                                                                                                                         |
| Date Submitted by the Author: | 11-Oct-2021                                                                                                                                                                                                                                                                                                                                                                                                                                                                                                                                                                                                                                                                                                                                                                                                                                                                                                                                                                                                                                                                                                                                                                                                                                                                                                                                                                                                                                                                               |
| Complete List of Authors:     | <p>Budin Ljøsne , Isabelle; Norwegian Institute of Public Health, Mowinckel , Athanasia Monika ; University of Oslo<br/> Friedman, Barbara ; University of Oslo<br/> Ebmeier , Klaus; University of Oxford<br/> Drevon, Christian; University of Oslo, Department of Nutrition, Institute of Basic Medical Sciences, Faculty of Medicine<br/> Carver, Rebecca; Norwegian Institute of Public Health<br/> Zsoldos, Eniko; University of Oxford<br/> Fredheim, Nanna; Norwegian Institute of Public Health<br/> Sørensen, Øystein; University of Oslo<br/> Baaré , William Frans Christiaan ; Copenhagen University Hospital<br/> Madsen , Kathrine ; Copenhagen University Hospital<br/> Fjell, Anders; University of Oslo, Department of Psychology, , Center for Lifespan Changes in Brain and Cognition<br/> Kievit, Rogier ; Radboud University Medical Center for Infectious Diseases<br/> Ghisletta, Paolo; University of Geneva<br/> Bartrés-Faz, David ; University of Barcelona<br/> Nawijn, Laura ; Vrije Universiteit Amsterdam<br/> Solé-Padullés , Cristina ; University of Barcelona<br/> Walhovd, Kristine; University of Oslo, Department of Psychology, , Center for Lifespan Changes in Brain and Cognition<br/> Düzel, Sandra; Max-Planck-Institute for Human Development<br/> Zasyekina, Larisa; Volyn National University of Lesya Ukrainka<br/> Iulita , Maria Florencia ; Universitat Autònoma de Barcelona<br/> Ferretti, Maria Teresa ; Women's Brain Project</p> |
| Keywords:                     | Health policy < HEALTH SERVICES ADMINISTRATION & MANAGEMENT, MENTAL HEALTH, Dementia < NEUROLOGY, PREVENTIVE MEDICINE, PUBLIC HEALTH                                                                                                                                                                                                                                                                                                                                                                                                                                                                                                                                                                                                                                                                                                                                                                                                                                                                                                                                                                                                                                                                                                                                                                                                                                                                                                                                                      |
|                               |                                                                                                                                                                                                                                                                                                                                                                                                                                                                                                                                                                                                                                                                                                                                                                                                                                                                                                                                                                                                                                                                                                                                                                                                                                                                                                                                                                                                                                                                                           |

SCHOLARONE™  
Manuscripts

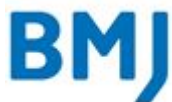

I, the Submitting Author has the right to grant and does grant on behalf of all authors of the Work (as defined in the below author licence), an exclusive licence and/or a non-exclusive licence for contributions from authors who are: i) UK Crown employees; ii) where BMJ has agreed a CC-BY licence shall apply, and/or iii) in accordance with the terms applicable for US Federal Government officers or employees acting as part of their official duties; on a worldwide, perpetual, irrevocable, royalty-free basis to BMJ Publishing Group Ltd ("BMJ") its licensees and where the relevant Journal is co-owned by BMJ to the co-owners of the Journal, to publish the Work in this journal and any other BMJ products and to exploit all rights, as set out in our [licence](#).

The Submitting Author accepts and understands that any supply made under these terms is made by BMJ to the Submitting Author unless you are acting as an employee on behalf of your employer or a postgraduate student of an affiliated institution which is paying any applicable article publishing charge ("APC") for Open Access articles. Where the Submitting Author wishes to make the Work available on an Open Access basis (and intends to pay the relevant APC), the terms of reuse of such Open Access shall be governed by a Creative Commons licence – details of these licences and which [Creative Commons](#) licence will apply to this Work are set out in our licence referred to above.

Other than as permitted in any relevant BMJ Author's Self Archiving Policies, I confirm this Work has not been accepted for publication elsewhere, is not being considered for publication elsewhere and does not duplicate material already published. I confirm all authors consent to publication of this Work and authorise the granting of this licence.

## What is brain health? Perceptions of 27,590 respondents to the Lifebrain Global Brain Health Survey

Isabelle Budin-Ljøsne (0000-0002-4610-1662)<sup>1\*</sup>, Athanasia Monika Mowinckel (0000-0002-5756-0223)<sup>2</sup>, Barbara Bodorkos Friedman<sup>3</sup>, Klaus P Ebmeier (0000-0002-5190-7038)<sup>4</sup>, Christian A Drevon (0000-0002-7216-2784)<sup>5</sup>, Rebecca Bruu Carver (0000-0003-4490-0441)<sup>6</sup>, Enikő Zsoldos (0000-0002-0478-6165)<sup>7</sup>, Nanna Alida Grit Fredheim (0000-0001-6110-125X)<sup>8</sup>, Øystein Sørensen (0000-0003-0724-3542)<sup>9</sup>, William Frans Christiaan Baaré (0000-0002-1810-7266)<sup>10</sup>, Kathrine Skak Madsen (0000-0001-8884-5902)<sup>11</sup>, Anders Martin Fjell (0000-0003-2502-8774)<sup>12</sup>, Rogier A Kievit<sup>13</sup> (0000-0003-0700-4568), Paolo Ghisletta<sup>14</sup> (0000-0001-7731-2406), David Bartrés-Faz<sup>15</sup> (0000-0001-6020-4118), Laura Nawijn<sup>16</sup> (0000-0001-7183-8933), Cristina Solé-Padullés (0000-0002-6653-1053)<sup>17</sup>, Kristine B. Walhovd (0000-0003-1918-1123)<sup>18</sup>, Sandra Düzel<sup>19</sup>, Larisa Zasyekina (0000-0001-8456-077)<sup>20</sup>, Maria Florencia Iulita (0000-0002-3360-4498)<sup>21</sup> and Maria Teresa Ferretti<sup>22</sup>

<sup>1</sup> Department of Genetics and Bioinformatics, Norwegian Institute of Public Health, Norway, Senior Adviser, Isabelle.budin.ljosne@fhi.no

<sup>2</sup> Center for Lifespan Changes in Brain and Cognition, Department of Psychology, University of Oslo, Norway, Researcher, a.m.mowinckel@psykologi.uio.no

<sup>3</sup> Center for Lifespan Changes in Brain and Cognition, Department of Psychology, University of Oslo, Norway, Research coordinator, b.b.friedman@psykologi.uio.no

<sup>4</sup> Department of Psychiatry (UOXF), Warneford Hospital, University of Oxford, OX37JX Oxford, UK. Chair of Old Age Psychiatry, klaus.ebmeier@psych.ox.ac.uk

<sup>5</sup> Vitas AS, Research Park, Gaustadalleen 21, 0349, Oslo, consultant; Department of Nutrition, Institute of Basic Medical Sciences, Faculty of Medicine, University of Oslo, Norway, Professor Emeritus, c.a.drevon@medisin.uio.no

<sup>6</sup> Department of Communication, Norwegian Institute of Public Health, Norway, senior Communication Officer, Rebecca.Bruu.Carver@fhi.no

1  
2 <sup>7</sup> Department of Psychiatry and Wellcome Centre for Integrative Neuroimaging (WIN), University of  
3  
4 Oxford, Oxford, OX3 7JX, United Kingdom, Postdoctoral Researcher, eniko.zsoldos@psych.ox.ac.uk  
5

6  
7 <sup>8</sup> Department of Genetics and Bioinformatics, Norwegian Institute of Public Health, Norway,  
8  
9 Researcher, NannaAlidaGrit.Fredheim@fhi.no  
10

11  
12 <sup>9</sup> Center for Lifespan Changes in Brain and Cognition, Department of Psychology, University of Oslo,  
13  
14 Norway, Associate Professor, oystein.sorensen@psykologi.uio.no  
15

16  
17 <sup>10</sup> Danish Research Centre for Magnetic Resonance, Centre for Functional and Diagnostic Imaging and  
18  
19 Research, Copenhagen University Hospital - Amager and Hvidovre, Copenhagen, Denmark, Senior  
20  
21 Researcher, wimb@drcmr.dk  
22

23  
24 <sup>11</sup> Danish Research Centre for Magnetic Resonance, Centre for Functional and Diagnostic Imaging and  
25  
26 Research, Copenhagen University Hospital - Amager and Hvidovre, Copenhagen, Denmark, Senior  
27  
28 Researcher, kathrine@drcmr.dk  
29

30  
31 <sup>12</sup> Center for Lifespan Changes in Brain and Cognition, Department of Psychology, University of Oslo,  
32  
33 Norway, Professor, a.m.fjell@psykologi.uio.no  
34

35  
36 <sup>13</sup> Cognitive Neuroscience Department, Donders Institute for Brain, Cognition and Behavior, Radboud  
37  
38 University Medical Center, Nijmegen, The Netherlands, Professor, roger.kievit@donders.ru.nl  
39

40  
41 <sup>14</sup> Faculty of Psychology and Educational Sciences, University of Geneva, Switzerland (full professor);  
42  
43 UniDistance Suisse, Brig, Switzerland (dean); Swiss National Centre of Competence in Research LIVES,  
44  
45 University of Geneva, Switzerland, Full professor, paolo.ghisletta@unige.ch  
46  
47

48  
49 <sup>15</sup> Department of Medicine, Faculty of Medicine and Health Sciences and Institute of Neuroscience,  
50  
51 University of Barcelona, Institut d'Investigacions Biomèdiques August Pi i Sunyer (IDIBAPS),  
52  
53 Barcelona, Spain, Professor, dbartres@ub.edu  
54

55  
56 <sup>16</sup> Amsterdam UMC, Location VUmc, Vrije Universiteit Amsterdam, Department of Psychiatry,  
57  
58 Amsterdam Neuroscience, Amsterdam, The Netherlands, Postdoctoral Researcher,  
59  
60 l.nawijn@amsterdamumc.nl

1  
2 <sup>17</sup> Department of Medicine, Faculty of Medicine and Health Sciences and Institute of Neuroscience,  
3  
4 University of Barcelona, Institut d'Investigacions Biomèdiques August Pi i Sunyer (IDIBAPS),  
5  
6 Barcelona, Spain; csolepadulles@ub.edu  
7  
8

9 <sup>18</sup> Center for Lifespan Changes in Brain and Cognition, Department of Psychology, University of Oslo,  
10  
11 Norway, Professor, k.b.walhovd@psykologi.uio.no  
12  
13

14 <sup>19</sup> Center for Lifespan Psychology, Max Planck Institute for Human Development, Berlin, Germany,  
15  
16 Senior Research Scientist, duezel@mpib-berlin.mpg.de  
17  
18

19 <sup>20</sup> Department of General and Clinical Psychology, Professor, Vice-Rector for Research and  
20  
21 International Affairs, Lesya Ukrainka Volyn National University, larisa.zasyekina@vnu.edu.ua  
22  
23

24 <sup>21</sup> Sant Pau Memory Unit, Department of Neurology, Hospital de la Santa Creu i Sant Pau, Biomedical  
25  
26 Research Institute Sant Pau, Universitat Autònoma de Barcelona, Barcelona, Spain, Senior Scientist,  
27  
28 miulita@santpau.cat  
29  
30

31 <sup>22</sup> Women's Brain Project, c/o Pfisterwisstrasse 14, 8357 Guntershausen, Switzerland, Chief Scientific  
32  
33 Officer, mariateresa.ferretti@gmail.com  
34  
35  
36  
37  
38  
39

40 **\* Correspondence:**  
41

42  
43 Dr. Isabelle Budin-Ljøsne. Email: Isabelle.budin.ljosne@fhi.no  
44  
45

46 Norwegian Institute of Public Health  
47  
48

49 P.O.Box 222 Skøyen  
50  
51

52 NO-0213 Oslo, Norway  
53  
54  
55  
56

57 **Keywords:** Survey, brain health, perceptions, attitudes, lifestyle, cognitive health, mental health,  
58  
59 policy  
60

**ABSTRACT**

**Objectives:** To investigate public awareness of and interest in brain health.

**Design:** Cross-sectional multi-language online survey.

**Setting:** Lifebrain posted the survey on its website and social media and shared it with stakeholders.

The survey was open from June 4, 2019 until August 31, 2020.

**Participants:** N=27,590 aged  $\geq 18$  years completed the survey. The respondents were predominantly women (71%), middle-aged (41-60 years; 37%) or above (>60 years; 46%), highly educated (69%) and resided in Europe (98%).

**Main outcome measures:** Perceptions of factors influencing brain health and life periods important to look after the brain, awareness of diseases and disorders associated with the brain.

**Results:** Factors rated by most respondents as having strong or very strong influence on brain health included substance use (92%), physical health (87%), sleeping habits (85%), social environment (83%) and genetics (83%), followed by life goals (72%), physical environment (72%), diet (71%), and socio-economic factors (36% to 61%). Most respondents rated all life periods as important for the brain (95-96%) although the prenatal period was lower ranked (84%). 99% of respondents associated Alzheimer's disease and dementia with the brain. Mental disorders such as schizophrenia (96%) and depression (95%) were more often associated with the brain than neurological disorders like stroke (88%) and Parkinson's disease (86%). Fewer respondents (<32%) associated cancer, hypertension, diabetes, and arthritis with the brain. Women and highly educated respondents more often rated factors and life periods to be important for brain health.

**Conclusions:** Respondents underscored the impact of some lifestyle factors, genetics, and environmental factors on the brain and emphasized the mental health dimension of brain health. Our sample was highly educated and probably more informed than the general population. Policymakers should inform publics less likely to have been exposed to brain health information about health behaviors beneficial for the brain across the lifespan.

## ARTICLE SUMMARY

### STRENGTHS AND LIMITATIONS OF THIS STUDY

- We conducted an online survey to investigate people's awareness and perceptions of brain health in a large sample of respondents across European countries and worldwide.
- The survey was developed in collaboration with representatives from patient- and civil society organizations, Lifebrain researchers and cohort participants, and members of the public. The survey was made available in 14 languages.
- Survey results show that our respondents recognized the impact of most lifestyle behaviors on brain health but had relatively less awareness of the role that diet, socio-economic factors, and taking care of the brain in the womb, may play. The respondents made a clear connection between mental health and the brain.
- Our results suggest a need for providing the public with more information about brain health across life stages, particularly targeting men and members of the public with lower educational levels.
- Our respondents were probably more interested in, and knowledgeable about, brain health than the general population.



## INTRODUCTION

Many neurological and mental conditions affect the brain's structure and function like dementia, stroke, depression, and schizophrenia, and significantly contribute to the global burden of non-communicable diseases<sup>1</sup>. The U.S. National Institute on Aging recently described brain health as the ability to *"remember, learn, plan, concentrate, and handle challenges [...] and be mentally and emotionally in balance, [...] making the most of the brain and taking care of it"*.<sup>2</sup> There is increasing evidence that adopting healthy lifestyles including physical activity, having a healthy diet and good cardiovascular control, restraining from substance use, avoiding chronic stress, and perhaps getting enough sleep, may reduce risk of developing some brain diseases, although such impacts are not conclusively understood<sup>3,4</sup>.

Despite the interrelation between our brain and our general health, there is limited knowledge of how people perceive brain health. Surveys have been conducted to investigate public perceptions of cognitive health and suggest varying and sometimes limited knowledge and awareness of dementia<sup>5</sup>, dementia risk<sup>6,7</sup>, factors contributing to cognitive decline,<sup>8,9</sup> and actions beneficial for the brain<sup>10</sup>. Others have observed a lack of awareness of some mental disorders, such as schizophrenia<sup>11</sup> and anxiety<sup>12</sup> and limited interest, by respondents of such surveys, in adjusting their lifestyles to maintain a healthy brain<sup>13</sup>. These surveys offered useful insights about perceptions of brain health but usually included national samples of under 3,000 respondents and focused on specific aspects of brain health. Due to the novelty of the concept of brain health, the use of common definitions, measures, and instruments across studies<sup>14</sup> was absent. Investigating perceptions of brain health in a larger, international sample, and exploring how views may differ depending on gender, age, and education, will provide new and useful knowledge and guide policy making at a European and a global level.

Understanding the views of the general population on the drivers of brain health is crucial for public health and policy. If there is a mismatch between what people consider important and what the best available evidence suggests, then there may be considerable public health gains to make by better explaining the benefits or dangers of certain factors, especially those that could be acted on by the

1 individual. The “Global Brain Health Survey”<sup>15</sup> was launched in June 2019 by the Lifebrain consortium<sup>16</sup>  
2 to investigate perceptions of brain health, the interest in preserving brain health, the willingness to  
3 learn more about the state of one’s brain health, and to explore the types of support that might be  
4 needed to adopt behaviors beneficial for brain health. We report results on how survey respondents  
5 perceived the concept of brain health. We use responses to survey questions relating to: (1) factors  
6 believed to influence brain health, (2) specific life periods considered important to look after one’s  
7 brain, and (3) diseases and disorders associated with the brain.  
8  
9  
10  
11  
12  
13  
14  
15  
16  
17  
18  
19  
20

## 21 **METHODS**

22 A detailed description of the survey’s background and design, technical platform as well as a summary  
23 of the main questionnaire has been published elsewhere<sup>15</sup>. The survey was led by Lifebrain, a European  
24 scientific consortium including 16 partners and data from brain imaging cohorts in eight European  
25 countries, totaling approximately 6,000 research participants<sup>17</sup>. In brief, the survey comprised of 28  
26 multiple-choice questions addressing brain health perceptions and 12 questions on demographics. The  
27 questions were developed using an interview guide from a previous qualitative interview study, where  
28 we investigated Lifebrain research participants’ perceptions of brain health<sup>18</sup>. The survey was  
29 translated in 14 languages, including English, Danish, Spanish, French, Norwegian, Catalan, German,  
30 Swedish, Hungarian, Ukrainian, Italian, Dutch, Chinese (simplified mandarin), and Turkish. The study  
31 applied the procedure of back translation. Anyone above the age of 18 years and consenting to the  
32 use of their answers for research could respond to the survey online. The survey was anonymous and  
33 took approximately 15-20 minutes to complete. On the introductory survey page, the U.S. National  
34 Institute on Aging’s description of brain health was provided<sup>2</sup>. The survey was made available online  
35 in June 2019 and was closed on 31 August 2020.  
36  
37  
38  
39  
40  
41  
42  
43  
44  
45  
46  
47  
48  
49  
50  
51  
52  
53  
54  
55  
56  
57  
58

## 59 **Patient and public involvement (PPI)**

1  
2 The draft survey questionnaire was shared and discussed with representatives from patient- and civil  
3 society organizations, Lifebrain researchers and cohort participants, and members of the public who  
4 participated in Lifebrain stakeholder workshops and public lectures in Spain, Norway, and the United  
5 Kingdom. Their suggestions for improvement were collected and integrated in later versions of the  
6 questionnaire. The questionnaire was also shared with national brain councils in Norway, Belgium, and  
7 Germany, and brain foundations, and some agreed to become official co-organizers of the survey.  
8  
9  
10  
11  
12  
13  
14  
15  
16  
17  
18

### 19 **Sampling**

20  
21 The survey was distributed via the Lifebrain cohorts' websites, social media, and newsletters and with  
22 help from different stakeholders in the consortium network. National brain councils, brain  
23 foundations, universities, professional societies, patient- and civil society organizations, and research  
24 registries, whose mission is to match interested volunteers with research groups, invited their  
25 members and networks to take the survey. In addition, Lifebrain researchers posted the survey on  
26 their websites and social media, and distributed leaflets presenting the survey at conferences,  
27 scientific events, in public libraries and hospital waiting rooms. The survey was also featured in the  
28 Scandinavian media<sup>19 20</sup>.  
29  
30  
31  
32  
33  
34  
35  
36  
37  
38  
39  
40  
41  
42

### 43 **Measures**

44  
45 In the survey, 3 out of 28 multiple-choice questions related to perceptions of brain health. The  
46 questions were not mandatory and could be skipped by the respondents. For each question,  
47 respondents could endorse any number of items.  
48  
49  
50  
51  
52

#### 53 *Factors influencing brain health*

54  
55 The first question was: "In your opinion, to what extent do the following influence brain health?". A  
56 list of 11 factors was provided including physical health, diet, physical environment (e.g., air pollution,  
57 noise), social environment (e.g., family, social network), education, profession, family income, genetics  
58  
59  
60

1  
2 and family medical history, substance use (e.g., alcohol, smoking and drugs), sleeping habits and having  
3  
4 goals that make life meaningful. The respondents could rate the factors using a 5-item Likert scale  
5  
6 (very strong, strong, moderate, weak, or no influence).  
7

#### 8 9 *Specific life periods to look after one's brain*

10  
11  
12 The second question was: "In your opinion, at what stages in life is it important to look after one's  
13  
14 brain?". Respondents could rate six life periods: in the womb (before birth), childhood (from birth to  
15  
16 12 years), adolescence (13-18 years), young adulthood (19-45 years), middle age (46-65 years) and old  
17  
18 age (over 65 years), using a 4-item Likert scale (very important, important, moderately important, not  
19  
20 important).  
21  
22

#### 23 24 *Diseases and disorders associated with the brain*

25  
26  
27 The third question was: "Which of the following diseases/disorders do you associate with the brain?".  
28  
29 A list of 13 disorders was provided, of which 10 are recognized brain disorders (i.e., Alzheimer's disease  
30  
31 and other forms of dementia, bipolar disorder, schizophrenia, Parkinson's disease, addiction, stroke,  
32  
33 depression, migraine, anxiety, cancer), and 3 are known to have an impact on the brain (i.e., diabetes,  
34  
35 arthritis, and hypertension). When listing cancer, we did not specify whether it referred to brain cancer  
36  
37 or other types of cancer.  
38  
39

40  
41 The respondents were asked about their age category (18-25, 26-40, 41-60, 61-70, 71-80, over 80),  
42  
43 gender (male, female, other, prefer not to tell), highest attained educational qualification (primary  
44  
45 school, special educational school, secondary school, vocational training, university/college degree),  
46  
47 relationship/civil status (single, in a stable relationship but not married, married, divorced or  
48  
49 separated, or widowed), and occupational status (employed for wages or self-employed, unemployed,  
50  
51 homemaker, student, retired, unable to work, or doing unpaid or voluntary work). The respondents  
52  
53 were also asked to rate their ability to think, remember and learn (hereafter referred to as "self-  
54  
55 reported *cognitive* health") as well as their ability to be mentally and emotionally in balance (hereafter  
56  
57 referred to as "self-reported *mental* health") using a 5-item Likert scale (excellent, above average,  
58  
59  
60

1  
2 average, below average, very poor). Finally, we asked for information about country of residence,  
3  
4 previous experience of participating in brain research (yes, no), educational or work experience in  
5  
6 health care (yes, no), experience of long-standing illness, disability, or health problem (yes, no), and  
7  
8 experience of looking after a family member with brain disease (yes, no).  
9

## 10 **Statistical analysis**

11  
12  
13  
14 Exploratory linear models were performed on all survey questions presented applying R version  
15  
16 4.1.0<sup>21</sup>. Ten models were used per response category, exploring the relationship between  
17  
18 demographic characteristics and responses. We report binarized responses and odds ratios for the  
19  
20 purposes of communication and simplicity. However, we are aware of the potential pitfalls <sup>22</sup> so for  
21  
22 purposes of robustness, we also report data modelled as continuous in the supplementary materials,  
23  
24 and note the similarities and differences are virtually identical as shown in **supplementary material 1**.  
25  
26 Complete detailed descriptive statistics are provided for all questions in **supplementary material 2** and  
27  
28 the continuous, binary, and ordinal models for question 1 and question 2 are provided in  
29  
30 **supplementary material 3**.  
31  
32  
33

34  
35 For the first question (factors influencing brain health), responses of “very strong” and “strong” were  
36  
37 classified as indicating an association between the question and response category, while the  
38  
39 remaining options (“moderate,” “weak” and “no influence”) were categorized as indicating no  
40  
41 association. Similarly, in the second question (life periods to take care of one’s brain), responses of  
42  
43 “very important” and “important” were classified as indicating a positive association between the  
44  
45 question and response category, while the remaining (“moderately important,” and “not important”)  
46  
47 were classified as not indicating an association. The third question was already on a binary scale, where  
48  
49 responses were logged by selecting from a list of diseases and disorders associated with brain health.  
50  
51 The 10 binomial models per category were applied with a single demographic variable as predictor,  
52  
53 one for each of the demographic variables of age, gender, education, relationship status, experience  
54  
55 or education in health care, experience with illness, experience of being a caregiver for someone with  
56  
57 a brain disease, rating of own cognitive health and rating of own mental health.  
58  
59  
60

Comparing country specific answers was not a goal of this study, and thus we did not use a stratified (by country) sample. Demographic variables with more than 3 response categories were reduced to aid interpretation of results. Education was reduced to whether the subject had higher education (university degree) or not. Age was reduced to three categories, “youngest” (those below 40 years), “middle-aged” (those between 40 and 60 years) and “oldest” (those above 60 years, the largest response group). Gender was reduced to three categories, “woman”, “man” and “other/prefer not to tell”. The ratings of subjects’ own mental and cognitive health were reduced to two categories, one for those rating their health as average or above, and those rating their health as below average. Relationship was reduced to those being in a stable relationship (married and domestic partnerships) or not. The base comparison groups for each predictor variable were set as the category where there was the highest number of subjects. Finally, the STROBE cross sectional reporting guidelines were used<sup>23</sup>.

## RESULTS

### Respondent characteristics

In total, 27,590 respondents from 81 countries completed the survey.

**Table 1. Number of respondents by country**

| Country                              | No of respondents | %          |
|--------------------------------------|-------------------|------------|
| United Kingdom                       | 10,160            | 36.8       |
| Netherlands                          | 7,023             | 25.5       |
| Norway                               | 3,549             | 12.9       |
| Spain                                | 2,095             | 7.6        |
| Denmark                              | 1,101             | 4.0        |
| Germany                              | 1,060             | 3.8        |
| Sweden                               | 760               | 2.8        |
| Italy                                | 311               | 1.1        |
| Ukraine                              | 311               | 1.1        |
| Hungary                              | 187               | 0.7        |
| USA                                  | 165               | 0.6        |
| Slovenia                             | 148               | 0.5        |
| Turkey                               | 139               | 0.5        |
| Belgium                              | 115               | 0.4        |
| Other (<100 respondents per country) | 466               | 1.7        |
| <b>Total</b>                         | <b>27,590</b>     | <b>100</b> |

1  
2 **Table 1** provides an overview of the number of respondents by country. The respondents  
3  
4 predominantly lived in Europe (98%) including the United Kingdom (36.8%), the Netherlands (25.5%),  
5  
6 Norway (12.9%), Spain (7.6%), Denmark (4.0%), Germany (3.8%), and Sweden (2.8%). Respondents  
7  
8 outside Europe primarily resided in the United States (0.6%) and Turkey (0.5%).  
9

10  
11  
12  
13  
14 **Table 2** provides an overview of the demographic characteristics of the whole sample. The  
15  
16 respondents were predominantly middle-aged (41-60: 37.4%) or older (>60: 46.2%), women (71.1%),  
17  
18 married or in a relationship (71.8%) and highly educated (68.6%). About half of respondents (51.4%)  
19  
20 reported being in paid employment and a third (38.5%) having an educational or employment  
21  
22 experience in health care. The respondents largely rated their cognitive health (93.9%) and their  
23  
24 mental health (86.8%) as average or above average. 40.4% of respondents reported having a long-  
25  
26 standing illness, disability, or health problem. 46.5% reported having an experience of looking after a  
27  
28 family member with brain disease, and 43.2% an experience of participating in brain research. A  
29  
30 majority of respondents (57%) had been recruited through the research registries Join Dementia  
31  
32 Research<sup>24</sup> in the United Kingdom and Hersenonderzoek.nl<sup>25</sup> in the Netherlands. The demographic  
33  
34 characteristics of respondents in the seven European countries with most responses is provided in  
35  
36  
37 **supplementary material 4.**  
38  
39  
40  
41  
42  
43  
44  
45  
46  
47  
48  
49  
50  
51  
52  
53  
54  
55  
56  
57  
58  
59  
60

**Table 2. Demographic characteristics of the whole sample**

| <b>Respondents</b>                                           | <b>No of respondents</b> | <b>%</b>     |
|--------------------------------------------------------------|--------------------------|--------------|
| <b>Gender</b>                                                |                          |              |
| Women                                                        | 19,626                   | 71.1         |
| Men                                                          | 7,833                    | 28.4         |
| Other                                                        | 131                      | 0.5          |
| <b>Total</b>                                                 | <b>27,590</b>            | <b>100.0</b> |
| <b>Age range (years)</b>                                     |                          |              |
| 18 – 40                                                      | 4,502                    | 16.4         |
| 41 – 60                                                      | 10,328                   | 37.4         |
| > 60                                                         | 12,760                   | 46.2         |
| <b>Education</b>                                             |                          |              |
| Higher education                                             | 18,925                   | 68.6         |
| Lower education                                              | 8,665                    | 31.4         |
| <b>Relationship status</b>                                   |                          |              |
| Yes                                                          | 19,819                   | 71.8         |
| No                                                           | 7,771                    | 28.2         |
| <b>Occupation*</b>                                           |                          |              |
| Employed for wages                                           | 14,181                   | 51.4         |
| Retired                                                      | 10,550                   | 38.2         |
| Other                                                        | 9,708                    | 35.2         |
| <b>Employment and/or education in health care</b>            |                          |              |
| No                                                           | 16,955                   | 61.5         |
| Yes                                                          | 10,635                   | 38.5         |
| <b>Participation in brain research</b>                       |                          |              |
| No                                                           | 15,671                   | 56.8         |
| Yes                                                          | 11,919                   | 43.2         |
| <b>Self-rated cognitive health</b>                           |                          |              |
| Below average                                                | 1,661                    | 6.1          |
| Average or above average                                     | 25,929                   | 93.9         |
| <b>Self-rated mental health</b>                              |                          |              |
| Below average                                                | 3,632                    | 13.2         |
| Average or above average                                     | 23,958                   | 86.8         |
| <b>Experience of illness, disability, or health problem</b>  |                          |              |
| No                                                           | 16,451                   | 59.6         |
| Yes                                                          | 11,139                   | 40.4         |
| <b>Experience as caregiver of patient with brain disease</b> |                          |              |
| No                                                           | 14,762                   | 53.5         |
| Yes                                                          | 12,828                   | 46.5         |

\* Percentages add up to >100% and N>27590 because multiple responses were allowed



## Factors influencing brain health

**Figure 1** shows how many respondents rated each factor as having strong or very strong influence on brain health. Most respondents rated substance use (92% of participants), physical health (87%), sleeping habits (85%), social environment (83%) and genetics (83%) as having a strong/very strong influence on brain health, followed by life goals (72%), physical environment (72%), diet (71%), and socio-economic factors such as education (61%), profession (56%) and income (36%). Other respondents rated the factors as having a moderate, weak or no influence on brain health. A detailed description of how factors were rated by all respondents according to a 5-item Likert scale is provided in the **supplementary material 2**, section 1.1 to 1.11).

Differences in response patterns were observed between demographic groups of respondents (**Table 3**). Men were less likely than women to consider factors such as substance use (odds ratio (OR) 0.66, 95% confidence interval (CI) 0.60-0.72), sleeping habits (OR 0.68, 95% CI 0.63-0.73) and diet (OR 0.70, 95% CI 0.66-0.74) as having strong or very strong influence on the brain. In contrast, men were more prone to rate profession (OR 1.18, 95% CI 1.12-1.24) and education (OR 1.13, 95% CI 1.07-1.19) as important. Respondents with low education put less emphasis on factors such as education (OR 0.62, 95% CI 0.59-0.65), physical health (OR 0.73, 95% CI 0.68-0.79), profession (OR 0.75, 95% CI 0.72-0.79) and substance use (OR 0.75, 95% CI 0.69-0.83) as compared with highly educated respondents. However, they had higher odds of considering income (OR 1.11, 95% CI 1.05-1.17) and physical environment (OR 1.06, 95% CI 1.00-1.12) as having a strong/very strong influence on brain health.

Participants older than 60 years gave more importance to income than the youngest (aged <40: OR 0.81, 95% CI 0.75-0.87) and middle-aged respondents (aged 41-60: OR 0.98, 95% CI 0.93-1.03). The same was observed for having meaningful goals in life (aged <40: OR 0.71, 95% CI 0.66-0.76; aged 41-60: OR 0.95, 95% CI 0.90-1.01). In contrast, importance given to sleep decreased with age (<40: OR 2.78, 95% CI 2.48-3.11; 41-60: OR 2.06, 95% CI 1.92-2.23; >60: OR 1). The same accounted for factors such as social environment (<40: OR 1.73, 95% CI 1.57-1.91; 41-60: OR 1.33, 95% CI 1.24-1.43; >60: OR

1  
2 1), diet (<40: OR 1.59, 95% CI 1.48-1.72; 41-60: OR 1.54, 95% CI 1.46-1.64; >60: OR 1), and profession  
3  
4 (<40: OR 1.33, 95% CI 1.24-1.43; 41-60: OR 1.16, 95% CI 1.10-1.22; >60: OR 1).  
5  
6

7 Respondents with a higher education level, respondents with a reported education or experience in  
8 health care, respondents who self-rated their cognitive and mental health as average or above, and  
9 women were more prone to rate all factors as having a strong or very strong influence on brain health  
10  
11 (For details, see **supplementary material 5**, tables 1-11). In contrast, respondents who self-rated their  
12 cognitive and mental health as below average were less likely to rate all factors as having a strong or  
13 very strong influence on brain health, with one notable exception. Respondents rating their mental  
14 health as below average were more likely to rate sleep as important (OR 1.33, 95% CI 1.20-1.48) as  
15 compared with respondents rating their mental health as average or above. Likewise, respondents in  
16 a stable relationship were less prone to rate sleep as important (OR 0.81, 95% CI 0.76-0.87), and more  
17 prone to rate genetics as important (OR 1.20, CI 1.13-1.28) as compared with other respondents not  
18 in a stable relationship.  
19  
20  
21  
22  
23  
24  
25  
26  
27  
28  
29  
30  
31  
32  
33  
34  
35  
36  
37  
38  
39  
40  
41  
42  
43  
44  
45  
46  
47  
48  
49  
50  
51  
52  
53  
54  
55  
56  
57  
58  
59  
60

**Table 3 – Factors believed to have a strong influence on brain health by demographic groups. Odd ratios (OR) and 95% confidence intervals (CI).**

| Variable         | Characteristics   | Substance use        |      |           | Genetics           |      |           | Physical health |      |           |
|------------------|-------------------|----------------------|------|-----------|--------------------|------|-----------|-----------------|------|-----------|
|                  |                   | %                    | OR   | 95% CI    | %                  | OR   | 95%CI     | %               | OR   | 95%CI     |
| Gender           | Women             | 93.3                 |      |           | 83.4               |      |           | 88.3            |      |           |
|                  | Men               | 90.1                 | 0.66 | 0.60-0.72 | 80.0               | 0.79 | 0.74-0.85 | 85.3            | 0.77 | 0.71-0.83 |
|                  | Other/Undisclosed | 85.8                 | 0.44 | 0.26-0.72 | 69.8               | 0.46 | 0.31-0.68 | 85.0            | 0.75 | 0.46-1.23 |
| Age              | >60 years         | 90.5                 |      |           | 83.4               |      |           | 86.6            |      |           |
|                  | 41-60 years       | 94.2                 | 1.70 | 1.54-1.89 | 83.6               | 1.01 | 0.94-1.08 | 88.1            | 1.14 | 1.05-1.23 |
|                  | <40 years         | 93.2                 | 1.43 | 1.25-1.63 | 76.6               | 0.65 | 0.60-0.70 | 88.4            | 1.17 | 1.06-1.30 |
| Education        | Higher education  | 93.0                 |      |           | 82.6               |      |           | 88.6            |      |           |
|                  | Lower education   | 90.9                 | 0.75 | 0.69-0.83 | 81.8               | 0.94 | 0.88-1.01 | 85.0            | 0.73 | 0.68-0.79 |
| Health care exp. | No                | 91.3                 |      |           | 81.7               |      |           | 85.7            |      |           |
|                  | Yes               | 94.0                 | 1.50 | 1.36-1.65 | 83.4               | 1.12 | 1.05-1.20 | 90.2            | 1.53 | 1.42-1.66 |
| Variable         | Characteristics   | Sleeping habits      |      |           | Social environment |      |           | Life goals      |      |           |
|                  |                   | %                    | OR   | 95% CI    | %                  | OR   | 95% CI    | %               | OR   | 95%CI     |
| Gender           | Women             | 86.5                 |      |           | 84.1               |      |           | 73.5            |      |           |
|                  | Men               | 81.3                 | 0.68 | 0.63-0.73 | 79.2               | 0.72 | 0.68-0.77 | 71.1            | 0.89 | 0.84-0.94 |
|                  | Other/Undisclosed | 87.4                 | 1.08 | 0.64-1.83 | 90.4               | 1.79 | 0.98-3.24 | 70.9            | 0.88 | 0.60-1.29 |
| Age              | >60 years         | 79.6                 |      |           | 79.9               |      |           | 74.3            |      |           |
|                  | 41-60 years       | 89.0                 | 2.06 | 1.92-2.23 | 84.1               | 1.33 | 1.24-1.43 | 73.3            | 0.95 | 0.90-1.01 |
|                  | <40 years         | 91.6                 | 2.78 | 2.48-3.11 | 87.3               | 1.73 | 1.57-1.91 | 67.2            | 0.71 | 0.66-0.76 |
| Education        | Higher education  | 85.8                 |      |           | 83.6               |      |           | 73.2            |      |           |
|                  | Lower education   | 83.4                 | 0.83 | 0.78-0.89 | 80.9               | 0.83 | 0.78-0.89 | 71.9            | 0.94 | 0.89-0.99 |
| Health care exp. | No                | 83.6                 |      |           | 80.6               |      |           | 70.9            |      |           |
|                  | Yes               | 87.3                 | 1.35 | 1.26-1.45 | 86.1               | 1.48 | 1.39-1.59 | 75.7            | 1.28 | 1.21-1.35 |
| Variable         | Characteristics   | Physical environment |      |           | Diet               |      |           | Education       |      |           |
|                  |                   | %                    | OR   | 95%CI     | %                  | OR   | 95%CI     | %               | OR   | 95%CI     |
| Gender           | Women             | 72.7                 |      |           | 73.7               |      |           | 59.8            |      |           |
|                  | Men               | 69.6                 | 0.86 | 0.81-0.91 | 66.2               | 0.70 | 0.66-0.74 | 62.7            | 1.13 | 1.07-1.19 |
|                  | Other/Undisclosed | 77.8                 | 1.31 | 0.86-2.00 | 72.4               | 0.94 | 0.63-1.39 | 64.6            | 1.22 | 0.85-1.76 |
| Age              | >60 years         | 69.8                 |      |           | 66.7               |      |           | 60.9            |      |           |
|                  | 41-60 years       | 74.3                 | 1.25 | 1.18-1.33 | 75.6               | 1.54 | 1.46-1.64 | 59.2            | 0.93 | 0.89-0.98 |
|                  | <40 years         | 71.7                 | 1.10 | 1.02-1.18 | 76.1               | 1.59 | 1.48-1.72 | 63.4            | 1.11 | 1.04-1.19 |
| Education        | Higher education  | 71.5                 |      |           | 73.1               |      |           | 64.3            |      |           |
|                  | Lower education   | 72.6                 | 1.06 | 1.00-1.12 | 68.2               | 0.79 | 0.74-0.83 | 52.6            | 0.62 | 0.59-0.65 |
| Health care exp. | No                | 70.5                 |      |           | 69.0               |      |           | 58.0            |      |           |
|                  | Yes               | 74.0                 | 1.19 | 1.13-1.26 | 75.6               | 1.39 | 1.32-1.47 | 64.8            | 1.33 | 1.27-1.40 |
| Variable         | Characteristics   | Profession           |      |           | Income             |      |           |                 |      |           |
|                  |                   | %                    | OR   | 95%CI     | %                  | OR   | 95%CI     |                 |      |           |
| Gender           | Women             | 54.6                 |      |           | 36.2               |      |           |                 |      |           |
|                  | Men               | 58.7                 | 1.18 | 1.12-1.24 | 35.0               | 0.95 | 0.90-1.00 |                 |      |           |
|                  | Other/Undisclosed | 54.3                 | 0.99 | 0.70-1.40 | 40.2               | 1.18 | 0.83-1.69 |                 |      |           |
| Age              | >60 years         | 53.2                 |      |           | 36.8               |      |           |                 |      |           |
|                  | 41-60 years       | 57.0                 | 1.16 | 1.10-1.22 | 36.3               | 0.98 | 0.93-1.03 |                 |      |           |
|                  | <40 years         | 60.2                 | 1.33 | 1.24-1.43 | 32.0               | 0.81 | 0.75-0.87 |                 |      |           |
| Education        | Higher education  | 58.0                 |      |           | 35.1               |      |           |                 |      |           |
|                  | Lower education   | 51.0                 | 0.75 | 0.72-0.79 | 37.5               | 1.11 | 1.05-1.17 |                 |      |           |
| Health care exp. | No                | 53.9                 |      |           | 33.5               |      |           |                 |      |           |
|                  | Yes               | 58.8                 | 1.23 | 1.17-1.29 | 39.6               | 1.30 | 1.24-1.37 |                 |      |           |

% indicates proportion of participants rating this factor as having a 'strong' or 'very strong' influence on brain health, with the remainder of participants rating it as 'moderate', 'weak' or 'no influence'.

## Life periods to look after ones' brain

**Figure 2** shows that the respondents rated most life periods as important or very important for the brain (95-96%), whereas the prenatal stage (in the womb) was rated as important or very important by 84% of respondents (**supplementary material 2**, section 2.1).

**Table 4** shows that men were less likely to consider life periods such as the middle age (OR 0.41, 95% CI 0.36-0.46) and old age (OR 0.41, 95% CI 0.37-0.47) as important as compared with women. Respondents with lower education were also less likely to rate life periods as important as compared with higher educated respondents, except for young adulthood (OR 1.06, 95% CI 0.93-1.19). The youngest respondents (<40) were less likely to consider middle age (OR 0.82, 95% CI 0.70-0.95) and old age as important (OR 0.55, 95% CI 0.47-0.64) compared with the oldest respondents (>60). Rather, the youngest respondents were more likely to consider childhood (OR 1.89, 95% CI 1.59-2.24) and adolescence important (OR 2.14, 95% CI 1.72-2.66) as compared with the oldest respondents (>60).

Respondents with an education or experience in health care were more prone to consider the life periods as important, especially pregnancy (OR 1.91, 95% CI 1.78-2.06) and childhood (OR 2.06, 95% CI 1.81-2.33) as compared with other respondents with no experience (**supplementary material 5**, section 2.6). Respondents with lower education were consistently less likely to consider the life periods as important as compared with respondents with higher education, except for young adulthood, which they were more likely to consider important as compared with the highly educated (OR 1.06, 95% CI 0.93-1.19). Respondents in a stable relationship were more prone to consider important taking care of the brain in old age (OR 1.21, CI 1.07-1.36) as compared with respondents not in a stable relationship.

**Table 4 – Life periods considered important to take care of one’s brain by demographic groups. OR and 95%CI.**

| Variable         | Characteristics   | In the womb             |      |           | Childhood (0-12)   |      |           | Adolescence (13-18) |      |           |
|------------------|-------------------|-------------------------|------|-----------|--------------------|------|-----------|---------------------|------|-----------|
|                  |                   | %                       | OR   | 95% CI    | %                  | OR   | 95%CI     | %                   | OR   | 95%CI     |
| Gender           | Women             | 85.9                    |      |           | 95.7               |      |           | 97.0                |      |           |
|                  | Men               | 78.0                    | 0.58 | 0.54-0.62 | 93.0               | 0.59 | 0.53-0.66 | 95.6                | 0.68 | 0.59-0.78 |
|                  | Other/Undisclosed | 86.4                    | 1.04 | 0.62-1.74 | 95.2               | 0.89 | 0.39-2.03 | 96.0                | 0.75 | 0.30-1.83 |
| Age              | >60 years         | 80.7                    |      |           | 93.4               |      |           | 95.5                |      |           |
|                  | 41-60 years       | 86.2                    | 1.49 | 1.38-1.60 | 96.2               | 1.78 | 1.57-2.01 | 97.3                | 1.71 | 1.48-1.98 |
|                  | <40 years         | 86.1                    | 1.48 | 1.34-1.63 | 96.4               | 1.89 | 1.59-2.24 | 97.9                | 2.14 | 1.72-2.66 |
| Education        | Higher education  | 86.0                    |      |           | 95.8               |      |           | 97.0                |      |           |
|                  | Lower education   | 78.5                    | 0.59 | 0.56-0.63 | 92.9               | 0.57 | 0.51-0.64 | 95.6                | 0.67 | 0.58-0.76 |
| Health care exp. | No                | 80.5                    |      |           | 93.7               |      |           | 95.9                |      |           |
|                  | Yes               | 88.8                    | 1.91 | 1.78-2.06 | 96.8               | 2.06 | 1.81-2.33 | 97.7                | 1.79 | 1.55-2.08 |
| Variable         | Characteristics   | Young adulthood (19-45) |      |           | Middle age (45-65) |      |           | Old age (>65)       |      |           |
|                  |                   | %                       | OR   | 95% CI    | %                  | OR   | 95%CI     | %                   | OR   | 95%CI     |
| Gender           | Women             | 96.2                    |      |           | 97.0               |      |           | 97.1                |      |           |
|                  | Men               | 93.4                    | 0.56 | 0.50-0.63 | 93.0               | 0.41 | 0.36-0.46 | 93.2                | 0.41 | 0.37-0.47 |
|                  | Other/Undisclosed | 92.8                    | 0.51 | 0.26-1.00 | 88.8               | 0.24 | 0.14-0.43 | 92.0                | 0.35 | 0.33-0.18 |
| Age              | >60 years         | 94.5                    |      |           | 95.3               |      |           | 96.2                |      |           |
|                  | 41-60 years       | 96.5                    | 1.59 | 1.40-1.81 | 97.2               | 1.68 | 1.46-1.94 | 96.8                | 1.19 | 1.03-1.37 |
|                  | <40 years         | 95.4                    | 1.21 | 1.03-1.42 | 94.3               | 0.82 | 0.70-0.95 | 93.3                | 0.55 | 0.47-0.64 |
| Education        | Higher education  | 95.3                    |      |           | 95.9               |      |           | 96.2                |      |           |
|                  | Lower education   | 95.6                    | 1.06 | 0.93-1.19 | 95.6               | 0.93 | 1.05-0.82 | 95.3                | 0.80 | 0.70-0.90 |
| Health care exp. | No                | 94.7                    |      |           | 95.2               |      |           | 95.4                |      |           |
|                  | Yes               | 96.6                    | 1.60 | 1.41-1.81 | 96.8               | 1.53 | 1.35-1.75 | 96.7                | 1.41 | 1.24-1.61 |

% indicates proportion of participants rating this life period as ‘important’ or ‘very important’, with the remainder of participants rating it as ‘not important’ or ‘moderately important’.

### Diseases and disorders associated with the brain

Figure 3 shows that 99% of the respondents associated Alzheimer’s disease (AD) and other forms of dementia with the brain. The next most often selected disorders were mental disorders like schizophrenia (96%), depression (95%), bipolar disorder (92%), anxiety (91%), and addiction (88%). Disorders least often associated with the brain included cancer (32%), hypertension (32%), diabetes (16%), and arthritis (5%).

Men were less likely than women to associate the diseases with the brain, and this was particularly observed for AD/dementia (OR 0.46, 95% CI 0.36-0.57), bipolar disorder (OR 0.48, 95% CI 0.44-0.52), stroke (OR 0.53, 95% CI 0.49-0.57) and schizophrenia (OR 0.65, 95% CI 0.57-0.73) (Table 5). A similar trend was observed among lower educated respondents, who were less likely to select disorders such as bipolar disorder (OR 0.43, 95% CI 0.39-0.47) and AD/dementia (OR 0.51, 95% CI 0.41-0.64) as compared with highly educated respondents.

1  
2 The youngest respondents (aged <40) were less likely to associate with the brain diseases often  
3  
4 appearing in old age such as AD/dementia (OR 0.35, 95% CI 0.26-0.47), stroke (OR 0.76, 95% CI 0.69-  
5  
6 0.84), hypertension (OR 0.65, 95% CI 0.61-0.71), and Parkinson's disease (OR 0.80, 95% CI 0.73-0.88),  
7  
8 as compared with respondents aged >60. In contrast, they more often selected disorders such as  
9  
10 migraine (OR 2.18, 95% CI 1.97-2.41) and mental health disorders like bipolar disorder (OR 1.90, 95%  
11  
12 CI 1.66-2.17), addiction (OR 1.50, 95% CI 1.34-1.68) or anxiety (OR 1.45, 95% CI 1.28-1.63).

13  
14  
15  
16 Respondents who self-assessed their mental health to be below average were less likely to associate  
17  
18 the given diseases/disorders above with the brain as compared with other respondents, although they  
19  
20 had higher odds of considering mental disorders such as anxiety (OR 1.48, 95% CI 1.29-1.69),  
21  
22 depression (OR 1.35, 95% CI 1.13-1.61), bipolar disorder (OR 1.26, 95% CI 1.10-1.45) and addiction (OR  
23  
24 1.11, 95% CI 0.99-1.24) as associated with the brain. Respondents with an experience of disease were  
25  
26 more likely, as compared with others with no such experience, to associate disorders such as arthritis  
27  
28 (OR 1.60, 95% CI 1.43-1.78), diabetes (OR 1.26, 95% CI 1.18-1.34) and hypertension (OR 1.20, 95% CI  
29  
30 1.14-1.27) with the brain (**supplementary material 5, tables 18-30**). Respondents in stable relationship  
31  
32 were twice as likely to associate Alzheimer's disease with the brain (OR 2.02, CI 1.60-2.55) as compared  
33  
34 with respondents not in a stable relationship.  
35  
36  
37  
38  
39  
40  
41  
42  
43  
44  
45  
46  
47  
48  
49  
50  
51  
52  
53  
54  
55  
56  
57  
58  
59  
60

**Table 5 – Diseases and disorders associated with the brain by demographic groups. OR and 95%CI.**

| Variable         | Characteristics   | AD and dementia  |      |           | Schizophrenia                                                                                                                                                                                  |      |           | Depression |      |           |
|------------------|-------------------|------------------|------|-----------|------------------------------------------------------------------------------------------------------------------------------------------------------------------------------------------------|------|-----------|------------|------|-----------|
|                  |                   | %                | OR   | 95% CI    | %                                                                                                                                                                                              | OR   | 95%CI     | %          | OR   | 95%CI     |
| Gender           | Women             | 99.2             |      |           | 96.3                                                                                                                                                                                           |      |           | 95.4       |      |           |
|                  | Men               | 98.2             | 0.46 | 0.36-0.57 | 94.3                                                                                                                                                                                           | 0.65 | 0.57-0.73 | 93.6       | 0.70 | 0.62-0.78 |
|                  | Other/Undisclosed | 96.2             | 0.21 | 0.08-0.51 | 91.6                                                                                                                                                                                           | 0.42 | 0.23-0.79 | 92.4       | 0.58 | 0.30-1.11 |
| Age              | >60 years         | 99.3             |      |           | 95.1                                                                                                                                                                                           |      |           | 94.2       |      |           |
|                  | 41-60 years       | 99.4             | 1.08 | 0.78-1.49 | 96.6                                                                                                                                                                                           | 1.47 | 1.29-1.68 | 96.1       | 1.52 | 1.34-1.72 |
|                  | <40 years         | 98.0             | 0.35 | 0.26-0.47 | 96.3                                                                                                                                                                                           | 1.34 | 1.13-1.60 | 95.4       | 1.29 | 1.10-1.51 |
| Education        | Higher education  | 99.2             |      |           | 96.4                                                                                                                                                                                           |      |           | 95.4       |      |           |
|                  | Lower education   | 98.4             | 0.51 | 0.41-0.64 | 94.3                                                                                                                                                                                           | 0.62 | 0.55-0.70 | 93.8       | 0.72 | 0.64-0.80 |
| Health care exp. | No                | 98.6             |      |           | 95.1                                                                                                                                                                                           |      |           | 94.3       |      |           |
|                  | Yes               | 99.3             | 2.09 | 1.60-2.74 | 96.7                                                                                                                                                                                           | 1.52 | 1.33-1.72 | 95.8       | 1.38 | 1.23-1.55 |
| Variable         | Characteristics   | Bipolar disorder |      |           | Anxiety                                                                                                                                                                                        |      |           | Addiction  |      |           |
|                  |                   | %                | OR   | 95% CI    | %                                                                                                                                                                                              | OR   | 95%CI     | %          | OR   | 95%CI     |
| Gender           | Women             | 93.4             |      |           | 91.2                                                                                                                                                                                           |      |           | 89.9       |      |           |
|                  | Men               | 87.1             | 0.48 | 0.44-0.52 | 89.2                                                                                                                                                                                           | 0.79 | 0.73-0.87 | 84.2       | 0.60 | 0.56-0.65 |
|                  | Other/Undisclosed | 90.1             | 0.64 | 0.36-1.14 | 91.6                                                                                                                                                                                           | 1.05 | 0.56-1.95 | 87.0       | 0.76 | 0.45-1.26 |
| Age              | >60 years         | 88.9             |      |           | 89.0                                                                                                                                                                                           |      |           | 86.6       |      |           |
|                  | 41-60 years       | 94.6             | 2.17 | 1.97-2.41 | 92.6                                                                                                                                                                                           | 1.55 | 1.41-1.69 | 89.8       | 1.37 | 1.26-1.49 |
|                  | <40 years         | 93.8             | 1.90 | 1.66-2.17 | 92.1                                                                                                                                                                                           | 1.45 | 1.28-1.63 | 90.6       | 1.50 | 1.34-1.68 |
| Education        | Higher education  | 93.9             |      |           | 91.5                                                                                                                                                                                           |      |           | 89.9       |      |           |
|                  | Lower education   | 86.7             | 0.43 | 0.39-0.47 | 88.9                                                                                                                                                                                           | 0.75 | 0.69-0.81 | 84.7       | 0.63 | 0.58-0.68 |
| Health care exp. | No                | 89.8             |      |           | 89.9                                                                                                                                                                                           |      |           | 85.8       |      |           |
|                  | Yes               | 94.6             | 1.98 | 1.80-2.19 | 91.8                                                                                                                                                                                           | 1.25 | 1.15-1.36 | 92.2       | 1.96 | 1.80-2.13 |
| Variable         | Characteristics   | Stroke           |      |           | Parkinson's disease                                                                                                                                                                            |      |           | Migraine   |      |           |
|                  |                   | %                | OR   | 95% CI    | %                                                                                                                                                                                              | OR   | 95%CI     | %          | OR   | 95%CI     |
| Gender           | Women             | 89.7             |      |           | 86.7                                                                                                                                                                                           |      |           |            |      |           |
|                  | Men               | 82.2             | 0.53 | 0.49-0.57 | 84.1                                                                                                                                                                                           | 0.81 | 0.75-0.87 | 83.4       |      |           |
|                  | Other/Undisclosed | 86.3             | 0.72 | 0.44-1.18 | 81.7                                                                                                                                                                                           | 0.68 | 0.44-1.07 | 79.6       | 0.78 | 0.73-0.83 |
| Age              | >60 years         | 87.7             |      |           | 86.1                                                                                                                                                                                           |      |           | 77.6       |      |           |
|                  | 41-60 years       | 89.3             | 1.16 | 1.07-1.26 | 87.5                                                                                                                                                                                           | 1.13 | 1.05-1.22 | 86.0       | 1.78 | 1.66-1.90 |
|                  | <40 years         | 84.5             | 0.76 | 0.69-0.84 | 82.2                                                                                                                                                                                           | 0.80 | 0.73-0.88 | 88.3       | 2.18 | 1.97-2.41 |
| Education        | Higher education  | 88.1             |      |           | 87.8                                                                                                                                                                                           |      |           | 84.1       |      |           |
|                  | Lower education   | 86.5             | 0.87 | 0.80-0.93 | 81.9                                                                                                                                                                                           | 0.63 | 0.59-0.68 | 78.3       | 0.68 | 0.64-0.73 |
| Health care exp. | No                | 84.3             |      |           | 82.9                                                                                                                                                                                           |      |           | 79.3       |      |           |
|                  | Yes               | 92.8             | 2.41 | 2.22-2.63 | 90.8                                                                                                                                                                                           | 2.03 | 1.88-2.20 | 87.1       | 1.75 | 1.64-1.88 |
| Variable         | Characteristics   | Cancer           |      |           | Hypertension                                                                                                                                                                                   |      |           | Diabetes   |      |           |
|                  |                   | %                | OR   | 95% CI    | %                                                                                                                                                                                              | OR   | 95%CI     | %          | OR   | 95%CI     |
| Gender           | Women             | 33.7             |      |           | 33.7                                                                                                                                                                                           |      |           | 16.6       |      |           |
|                  | Men               | 27.8             | 0.76 | 0.71-0.80 | 26.5                                                                                                                                                                                           | 0.71 | 0.67-0.75 | 13.8       | 0.80 | 0.74-0.86 |
|                  | Other/Undisclosed | 35.9             | 1.10 | 0.77-1.57 | 39.7                                                                                                                                                                                           | 1.30 | 0.91-1.84 | 24.4       | 1.62 | 1.09-2.42 |
| Age              | >60 years         | 28.5             |      |           | 34.2                                                                                                                                                                                           |      |           | 15.3       |      |           |
|                  | 41-60 years       | 34.1             | 1.30 | 1.23-1.37 | 31.5                                                                                                                                                                                           | 0.89 | 0.84-0.94 | 17.2       | 1.15 | 1.07-1.23 |
|                  | <40 years         | 38.2             | 1.55 | 1.44-1.67 | 25.4                                                                                                                                                                                           | 0.65 | 0.61-0.71 | 14.7       | 0.95 | 0.86-1.05 |
| Education        | Higher education  | 34.1             |      |           | 33.4                                                                                                                                                                                           |      |           | 17.3       |      |           |
|                  | Lower education   | 27.6             | 0.74 | 0.70-0.78 | 27.8                                                                                                                                                                                           | 0.77 | 0.73-0.81 | 12.8       | 0.70 | 0.65-0.75 |
| Health care exp. | No                | 27.3             |      |           | 24.9                                                                                                                                                                                           |      |           | 10.6       |      |           |
|                  | Yes               | 39.6             | 1.75 | 1.66-1.84 | 42.5                                                                                                                                                                                           | 2.24 | 2.12-2.36 | 24.3       | 2.71 | 2.54-2.90 |
| Variable         | Characteristics   | Arthritis        |      |           | <i>% indicates proportion of participants rating this disorder or disease as 'associated with the brain', with the remainder of participants rating it as 'not associated with the brain'.</i> |      |           |            |      |           |
|                  |                   | %                | OR   | 95% CI    |                                                                                                                                                                                                |      |           |            |      |           |
| Gender           | Women             | 5.1              |      |           |                                                                                                                                                                                                |      |           |            |      |           |
|                  | Men               | 3.9              | 0.75 | 0.66-0.86 |                                                                                                                                                                                                |      |           |            |      |           |
|                  | Other/Undisclosed | 6.1              | 1.21 | 0.59-2.47 |                                                                                                                                                                                                |      |           |            |      |           |
| Age              | >60 years         | 4.5              |      |           |                                                                                                                                                                                                |      |           |            |      |           |
|                  | 41-60 years       | 5.2              | 1.15 | 1.02-1.30 |                                                                                                                                                                                                |      |           |            |      |           |
|                  | <40 years         | 4.6              | 1.01 | 0.86-1.19 |                                                                                                                                                                                                |      |           |            |      |           |
| Education        | Higher education  | 4.9              |      |           |                                                                                                                                                                                                |      |           |            |      |           |
|                  | Lower education   | 4.6              | 0.94 | 0.84-1.06 |                                                                                                                                                                                                |      |           |            |      |           |
| Health care exp. | No                | 3.4              |      |           |                                                                                                                                                                                                |      |           |            |      |           |
|                  | Yes               | 7.0              | 2.13 | 1.90-2.38 |                                                                                                                                                                                                |      |           |            |      |           |

## DISCUSSION

### Summary of findings

To the best of our knowledge, this study was the first and largest survey to investigate public perceptions of brain health across countries using an online questionnaire available in multiple languages. Our respondents considered certain behaviors such as substance use (i.e., smoking, drugs, and alcohol consumption) and factors such as lifestyle, physical health, genetics, and social environment important for brain health. Other factors included, in decreasing order of importance, diet, the physical environment and having goals that make life meaningful, followed by socio-economic factors such as income, profession, and education. The respondents rated all life periods as important for the brain although taking care of the brain in the womb (before birth) received relatively less attention. Our respondents might however have interpreted our question in two ways: taking care of one's brain during pregnancy or taking care of the unborn child's brain during pregnancy. Awareness of Alzheimer's disease and dementia affecting the brain was high. Our respondents more frequently associated mental disorders such as schizophrenia and depression with the brain as compared with neurological disorders such as stroke and Parkinson's disease, although it should be noted that both classes were most often ranked as associated. Disorders that are not defined as brain diseases but have an impact on the brain such as hypertension, diabetes and arthritis were associated with the brain only to a small extent. Overall, women and highly educated respondents more often rated items as important than men and less educated participants. Men and women also differed in which factors they considered important for brain health.

### Relevance to previous research

The high ranking of substance use as a factor influencing brain health is consistent with data from surveys in Australia and the USA<sup>26 27</sup> but not from previous surveys in Ireland<sup>5</sup> or the Netherlands<sup>7</sup> where other factors like cognitive activity were given more importance. A recent scoping review of



1  
2 studies examining public perceptions of risk and protective factors related to cognitive health and  
3  
4 impairment reported that genetics was the most identified risk factor for Alzheimer's disease and  
5  
6 dementia<sup>14</sup>. In our survey, genetics was considered highly important for brain health. Likewise, our  
7  
8 respondents' high ranking of sleep corroborates results from a recent U.K.-wide survey in which  
9  
10 respondents perceived sleep as important for maintaining or improving cognitive skills <sup>28</sup>.

11  
12  
13 Physical health was rated as highly important in our study in contrast to what previous surveys found<sup>6</sup>  
14  
15 <sup>7 26</sup>, which reported limited awareness of how high blood pressure, coronary heart disease, obesity and  
16  
17 plasma cholesterol levels influence brain health. In our questionnaire, we did not provide any example  
18  
19 of what physical health entails, so we do not know exactly how our respondents interpreted the  
20  
21 question. Results across studies may also be difficult to compare due to differences in the measures  
22  
23 and instruments used. Our respondents less often deemed diet to be of very strong importance for  
24  
25 brain health relative to other lifestyle factors, in line with previous studies<sup>5 29</sup>. Although the topic has  
26  
27 been little explored, our participants' limited emphasis on socio-economic factors is in line with results  
28  
29 from an Australian survey on cognitive health <sup>26</sup>. Views may however differ in low- and middle-income  
30  
31 countries.  
32  
33  
34  
35  
36

37 To our knowledge, few studies have investigated what life periods people consider important for  
38  
39 taking care of the brain. A recent global Ipsos survey (2021) looked at perceptions of the importance  
40  
41 of early life for a person's health and happiness in adulthood<sup>30</sup> and found that people did not consider  
42  
43 the early (first five) years as important for later health, compared with other periods of life. Previous  
44  
45 research has shown that focus is often put on old age, as it might be considered as a risk factor for  
46  
47 cognitive decline<sup>31</sup>. In contrast, our respondents attributed high importance to childhood although  
48  
49 they tended to rank age ranges closer to their own as more important. Similarly, we have not found  
50  
51 studies specifically investigating which diseases people associate with the brain. Other surveys have  
52  
53 shown public awareness of dementia<sup>9</sup>, as confirmed by our results, despite limited knowledge of  
54  
55 disease mechanisms and risk and protective factors<sup>5</sup>, little concern regarding risk of developing  
56  
57 dementia<sup>8</sup>, and limited public awareness of the prevalence and characteristics of mental illnesses such  
58  
59  
60

1  
2 as schizophrenia and bipolar disorders<sup>11 32</sup>. Men in our sample were less prone to associate Alzheimer's  
3  
4 disease with the brain. Other surveys have also reported gender differences in willingness to take  
5  
6 action to reduce risk of cognitive decline<sup>6 8</sup>.  
7  
8  
9

### 11 12 **Implications for policymakers**

13  
14  
15 Our survey highlights the importance of increasing public awareness about some aspects of brain  
16  
17 health and targeting policy actions toward specific segments of population. Detailed information  
18  
19 should be provided about dietary habits and physical activity beneficial for physical health and for the  
20  
21 brain. Our findings indicate that people may underestimate the importance of risk factors such as  
22  
23 diabetes and poor vascular health for brain health, suggesting an avenue for improved public health  
24  
25 messaging.  
26  
27

28  
29 Governments have given relatively little priority to the prevention of mental health disorders as  
30  
31 compared to other diseases<sup>33</sup>. Our respondents made a clear connection between mental health and  
32  
33 brain health, which may be due to their experience of the increasing societal burden of mental and  
34  
35 addictive disorders<sup>34</sup>. The outbreak of the COVID-19 pandemic in 2020, with strong implications for  
36  
37 mental health<sup>35</sup> in populations, may also have influenced responses. However, we cannot verify this as  
38  
39 the survey was anonymous and no time logs were recorded.  
40  
41  
42  
43  
44  
45

### 46 **Strengths and limitations**

47  
48  
49 We believe that our study has several strengths. First, we consulted representatives from patient and  
50  
51 civil society organizations such as patient organizations and national brain councils when developing  
52  
53 the survey questionnaire. They are knowledgeable about how the public processes health-related  
54  
55 information and helped strengthen the readability and relevance of our questions. The questions were  
56  
57 also piloted in a previous study<sup>18</sup> and at several public meetings. Second, we translated the survey into  
58  
59 14 languages, made it available online, and promoted it in Europe and beyond. Although we collected  
60

1  
2 few responses outside Europe, we achieved a sample size up to 10 times larger than in previous  
3  
4 comparable surveys<sup>26 7 36</sup>. Thus, our results may provide insight into how Europeans view brain health.  
5  
6 Third, our survey described brain health as encompassing both cognitive and mental health. This  
7  
8 definition was more comprehensive than in other studies, which often focused solely on one aspect of  
9  
10 brain health such as cognitive decline. This may make our results more relevant when discussing brain  
11  
12 health promotion.  
13  
14

15  
16 Our study has limitations. Our respondents were predominantly highly educated women from the  
17  
18 oldest segment of population. This is likely due to our recruitment strategy. Several of the Lifebrain  
19  
20 cohorts<sup>17</sup> as well as the research registries we used to recruit participants included more female,  
21  
22 educated volunteers<sup>25</sup>. This may also be because women appear more concerned about cognitive  
23  
24 decline and the maintenance of cognitive skills<sup>28 37</sup> than men. Our respondents were probably more  
25  
26 interested in, and knowledgeable about, brain health than the general population. We also do not  
27  
28 know whether people in developing countries would manifest different perceptions to brain health,  
29  
30 particularly the influence of socio-economic factors. Another limitation of our study is that an online  
31  
32 survey is more easily accessed by the most resourceful population groups with digital connection and  
33  
34 competence. We were aware of this limitation when conceiving the study but aimed to reach a large  
35  
36 international sample and include respondents from the Lifebrain consortium. Using an online tool was  
37  
38 the most appropriate strategy due to our limited resources and it facilitated anonymous collection of  
39  
40 data. Finally, although great care was taken in the translation and back-translation process<sup>15</sup> and  
41  
42 stakeholders in several countries helped adapt the survey to their local circumstances, there is a risk  
43  
44 that our international respondents interpreted our questions slightly differently due to nuances in  
45  
46 translations and the novelty of the concept of brain health<sup>18</sup>.  
47  
48  
49  
50  
51  
52  
53  
54

## 55 **CONCLUSIONS AND FUTURE DIRECTIONS**

56  
57  
58 Our findings reflect a relatively good understanding of some facets of brain health. Awareness was  
59  
60 higher among highly educated, female respondents as compared to male and lowly educated

1  
2 respondents. Because most of our respondents resided in Europe, further research should investigate  
3  
4 views on brain health in non-western countries due to cultural variations<sup>38</sup>. Differences in perceptions  
5  
6 of brain health were noted among specific segments of the population, suggesting that targeted policy  
7  
8 actions towards these groups might be of relevance. Exploring how perceptions of brain health relate  
9  
10 to intentions to follow brain-friendly lifestyles will also be of interest, knowing that such intentions  
11  
12 may also depend on perceptions of risk<sup>39 40</sup> and the socio-economic, physical, and technological  
13  
14 contexts in which people navigate<sup>41</sup>. Analysis of subsequent questions in this survey will provide some  
15  
16 answers to this question. Future studies should also consider adopting alternative recruitment  
17  
18 techniques and data collection platforms and include more men and respondents more representative  
19  
20 of the general population.  
21  
22  
23  
24  
25  
26  
27

## 28 **Acknowledgments**

29  
30 We are grateful for the valuable help we received from many people to develop and disseminate the  
31  
32 survey. This includes, but is not limited to, the Lifebrain research staff, the stakeholders who  
33  
34 participated in Lifebrain workshops and public lectures, representatives from the Norwegian Brain  
35  
36 Council, the Belgian Brain Council, the German Brain Council, the Brain Foundation Netherlands  
37  
38 (Hersenstichting.nl), the Swedish Brain Foundation, the Women's Brain Project, the National University  
39  
40 of Ostroh Academy in Ukraine, Join Dementia Research, Hersenonderzoek, patient organizations and  
41  
42 professional societies in Europe and elsewhere. We thank the survey respondents for their  
43  
44 contribution.  
45  
46  
47  
48  
49  
50  
51

## 52 **Contributors**

53  
54  
55 IBL led the study and drafted the manuscript. AMM, KPE, ØS and EZs had full access to the raw data  
56  
57 and conducted the statistical analysis. IBL, BBF, CAD, NAGF and RBC made substantial contribution to  
58  
59 the analysis of the data. All the authors contributed to the acquisition, analysis, and interpretation of  
60

1  
2 data, substantively revised the manuscript, and approved the submitted version. The corresponding  
3  
4 author attests that all listed authors meet authorship criteria and that no others meeting the criteria  
5  
6 have been omitted.  
7  
8  
9

## 10 11 12 **Funding**

13  
14  
15 This research was funded by the EU Horizon 2020 Grant: Healthy minds 0–100 years: Optimising the  
16  
17 use of European brain imaging cohorts (Lifebrain), Grant Agreement No. 732592.  
18  
19  
20  
21  
22

## 23 **Competing interest**

24  
25  
26 Competing interests: All authors have completed the ICMJE uniform disclosure form at  
27  
28 [www.icmje.org/coi\\_disclosure.pdf](http://www.icmje.org/coi_disclosure.pdf) and declare: no support from any organisation for the submitted  
29  
30 work; no financial relationships with any organisations that might have an interest in the submitted  
31  
32 work in the previous three years [or describe if any]; no other relationships or activities that could  
33  
34 appear to have influenced the submitted work.  
35  
36  
37

38 MTF is the Chief Scientific Officer of the Women's Brain Project and has received personal fees from  
39  
40 Eli Lilly on a project not related to the current paper.  
41  
42  
43  
44  
45

## 46 **Patients consent for publication**

47  
48  
49 Not required  
50  
51  
52  
53

## 54 **Ethics approval**

55  
56  
57 The survey was reviewed by the Regional Committees for Medical and Health Research Ethics in  
58  
59 Norway (2017/653 REK Sørøst B) and approved for exemption from ethics approval according to the  
60

1  
2 Norwegian Health Research Act. In addition, the survey was approved by the University of Oxford  
3  
4 Medical Sciences Interdivisional Research Ethics Committee (R67364/RE001) and the Medical Ethics  
5  
6 Review Committee of VU University Medical Center in the Netherlands as required for dissemination  
7  
8 in the country's research networks. Ethics approval was not required for dissemination in the other  
9  
10 Lifebrain partner countries.  
11  
12  
13  
14  
15

### 16 **Data availability statement**

17  
18  
19 Data will be made available via an open science platform before the Lifebrain project ends.  
20  
21  
22  
23  
24

### 25 **Transparency declaration**

26  
27  
28 The corresponding author affirms that this manuscript is an honest, accurate, and transparent account  
29  
30 of the study being reported; that no important aspects of the study have been omitted; and that any  
31  
32 discrepancies from the study as planned (and, if relevant, registered) have been explained.  
33  
34  
35  
36  
37  
38

### 39 **Copyright/license for publication**

40  
41 The corresponding author has the right to grant on behalf of all authors and does grant on behalf of all  
42  
43 authors, a worldwide license to the Publishers and its licensees in perpetuity, in all forms, formats and  
44  
45 media (whether known now or created in the future), to i) publish, reproduce, distribute, display and  
46  
47 store the Contribution, ii) translate the Contribution into other languages, create adaptations, reprints,  
48  
49 include within collections and create summaries, extracts and/or, abstracts of the Contribution, iii)  
50  
51 create any other derivative work(s) based on the Contribution, iv) to exploit all subsidiary rights in the  
52  
53 Contribution, v) the inclusion of electronic links from the Contribution to third party material where-  
54  
55 ever it may be located; and, vi) license any third party to do any or all of the above.  
56  
57  
58  
59  
60

## REFERENCES

1. Raggi A, Leonardi M. Burden of brain disorders in Europe in 2017 and comparison with other non-communicable disease groups. *J Neurol Neurosurg Psychiatry* 2020;91(1):104-05. doi: 10.1136/jnnp-2019-320466 [published Online First: 2019/06/19]
2. National Institute on Aging U. What is brain health? : National Institute on Aging; 2019 [Available from: <https://brainhealth.nia.nih.gov/> accessed 20 May 2019.
3. Mintzer J, Donovan KA, Kindy AZ, et al. Lifestyle Choices and Brain Health. *Frontiers in Medicine* 2019;6(204) doi: 10.3389/fmed.2019.00204
4. Livingston G, Sommerlad A, Orgeta V, et al. Dementia prevention, intervention, and care. *Lancet* 2017 doi: 10.1016/S0140-6736(17)31363-6
5. Glynn RW, Shelley E, Lawlor BA. Public knowledge and understanding of dementia-evidence from a national survey in Ireland. *Age Ageing* 2017;46(5):865-69. doi: 10.1093/ageing/afx082 [published Online First: 2017/05/23]
6. Barak Y, Gray AR, Rapsey C, et al. The Dunedin dementia risk awareness project: pilot study in older adults. *Int Psychogeriatr* 2020;32(2):241-54. doi: 10.1017/S1041610219000772 [published Online First: 2019/09/14]
7. Heger I, Deckers K, van Boxtel M, et al. Dementia awareness and risk perception in middle-aged and older individuals: baseline results of the MijneBreincoach survey on the association between lifestyle and brain health. *BMC Public Health* 2019;19(1):678. doi: 10.1186/s12889-019-7010-z
8. Smith BJ, Ali S, Quach H. Public knowledge and beliefs about dementia risk reduction: a national survey of Australians. *BMC Public Health* 2014;14:661. doi: 10.1186/1471-2458-14-661
9. Anderson LA, Day KL, Beard RL, et al. The public's perceptions about cognitive health and Alzheimer's disease among the U.S. population: a national review. *Gerontologist* 2009;49 Suppl 1:S3-11. doi: 10.1093/geront/gnp088
10. Alzheimer's Research UK. Dementia Attitudes Monitor. Wave 1 2018. Shaping breakthroughs in public understanding of dementia and attitudes to research., 2018.
11. Durand-Zaleski I, Scott J, Rouillon F, et al. A first national survey of knowledge, attitudes and behaviours towards schizophrenia, bipolar disorders and autism in France. *BMC Psychiatry* 2012;12:128. doi: 10.1186/1471-244X-12-128 [published Online First: 2012/08/30]
12. Alonso J, Buron A, Bruffaerts R, et al. Association of perceived stigma and mood and anxiety disorders: results from the World Mental Health Surveys. *Acta Psychiatr Scand* 2008;118(4):305-14. doi: 10.1111/j.1600-0447.2008.01241.x [published Online First: 2008/08/30]
13. Skufca L. 2015 Survey on Brain Health Washington, DC October 2015 [Available from: <https://www.aarp.org/research/topics/health/info-2015/2015-brain-health-survey.html>.
14. Friedman DB, Becofsky K, Anderson LA, et al. Public perceptions about risk and protective factors for cognitive health and impairment: a review of the literature. *Int Psychogeriatr* 2015;27(8):1263-75. doi: 10.1017/S1041610214002877
15. Budin-Ljøsne I, Friedman BB, Suri S, et al. The Global Brain Health Survey: Development of a Multi-Language Survey of Public Views on Brain Health. *Frontiers in Public Health* 2020;8(387) doi: 10.3389/fpubh.2020.00387
16. The Lifebrain Consortium. Lifebrain 2018 [Available from: <http://www.lifebrain.uio.no/>.
17. Walhovd KB, Fjell AM, Westerhausen R, et al. Healthy minds from 0-100 years: Optimising the use of European brain imaging cohorts ("Lifebrain"). *Eur Psychiatry* 2017;47:76-87. doi: 10.1016/j.eurpsy.2017.10.005
18. Friedman BB, Suri S, Sole-Padullés C, et al. Are People Ready for Personalized Brain Health? Perspectives of Research Participants in the Lifebrain Consortium. *Gerontologist* 2019 doi: 10.1093/geront/gnz155
19. Baare WFCM, KS; Arnesen, M; Carver, RB; Drevon, CA; Budin-Ljøsne, I Brain researchers want to know how you take care of your brain 2020 [Available from:

- <https://sciencenordic.com/brain-denmark-researchers-zone/brain-researchers-want-to-know-how-you-take-care-of-your-brain/1621966>.
20. Baare WFCM KA, M; Carver, RB; Drevon, CA; Budin-Ljøsne, I. Hjælp forskerne: Hvordan passer du på din hjerne? : Forskerzonen; 2020 [Available from: <https://videnskab.dk/krop-sundhed/hjaelp-forskerne-hvordan-passer-du-paa-din-hjerne>].
  21. R: A Language and Environment for Statistical Computing [program]: R Foundation for Statistical Computing, 2021.
  22. Altman DG, Royston P. The cost of dichotomising continuous variables. *BMJ* 2006;332(7549):1080. doi: 10.1136/bmj.332.7549.1080
  23. Elm Ev, Altman DG, Egger M, et al. Strengthening the reporting of observational studies in epidemiology (STROBE) statement: guidelines for reporting observational studies. *BMJ* 2007;335(7624):806-08. doi: 10.1136/bmj.39335.541782.AD
  24. Join Dementia Research [Available from: <https://www.joindementiaresearch.nihr.ac.uk/>].
  25. Hersenonderzoek.nl. [Available from: <https://herenonderzoek.nl/>].
  26. Hosking DE, Sargent-Cox KA, Anstey KJ. An Australian survey of cognitive health beliefs, intentions, and behaviours through the adult life course. *Prev Med Rep* 2015;2:498-504. doi: 10.1016/j.pmedr.2015.06.008
  27. American Society on Aging. ASA-MetLife Foundation Attitudes and Awareness of Brain Health Poll, 2006.
  28. Vaportzis E, Gow AJ. People's Beliefs and Expectations About How Cognitive Skills Change with Age: Evidence From a U.K.-Wide Aging Survey. *Am J Geriatr Psychiatry* 2018;26(7):797-805. doi: 10.1016/j.jagp.2018.03.016 [published Online First: 2018/05/08]
  29. Wilcox S, Sharkey JR, Mathews AE, et al. Perceptions and Beliefs About the Role of Physical Activity and Nutrition on Brain Health in Older Adults. *Gerontologist* 2009;49 doi: 10.1093/geront/gnp078
  30. IPSOS. Attitudes towards the early years, 2021.
  31. Maust DT, Solway E, Langa KM, et al. Perception of Dementia Risk and Preventive Actions Among US Adults Aged 50 to 64 Years. *JAMA Neurol* 2020;77(2):259-62. doi: 10.1001/jamaneurol.2019.3946 [published Online First: 2019/11/16]
  32. Cadge C, Connor C, Greenfield S. University students' understanding and perceptions of schizophrenia in the UK: a qualitative study. *BMJ Open* 2019;9(4):e025813. doi: 10.1136/bmjopen-2018-025813 [published Online First: 2019/04/06]
  33. World Health Organization. Investing in mental health: evidence for action, 2013.
  34. Rehm J, Shield KD. Global Burden of Disease and the Impact of Mental and Addictive Disorders. *Curr Psychiatry Rep* 2019;21(2):10. doi: 10.1007/s11920-019-0997-0 [published Online First: 2019/02/08]
  35. Barzilay R, Moore TM, Greenberg DM, et al. Resilience, COVID-19-related stress, anxiety and depression during the pandemic in a large population enriched for healthcare providers. *Translational Psychiatry* 2020;10(1):291. doi: 10.1038/s41398-020-00982-4
  36. Mehegan LR, C; Skufca L. 2017 Brain Health and Nutrition Survey. AARP Research 2018 [Available from: <https://doi.org/10.26419/res.00187.001>].
  37. Wu B, Goins RT, Laditka JN, et al. Gender differences in views about cognitive health and healthy lifestyle behaviors among rural older adults. *Gerontologist* 2009;49 Suppl 1:S72-8. doi: 10.1093/geront/gnp077
  38. Wang Y, Pan Y, Li H. What is brain health and why is it important? *Bmj* 2020;371:m3683. doi: 10.1136/bmj.m3683 [published Online First: 2020/10/11]
  39. Gaube S, Lermer E, Fischer P. The Concept of Risk Perception in Health-Related Behavior Theory and Behavior Change. In: Raue M, Streicher B, Lermer E, eds. Perceived Safety: A Multidisciplinary Perspective. Cham: Springer International Publishing 2019:101-18.
  40. Ferrer R, Klein WM. Risk perceptions and health behavior. *Curr Opin Psychol* 2015;5:85-89. doi: 10.1016/j.copsyc.2015.03.012 [published Online First: 2015/08/11]



1  
2  
3  
4  
5  
6  
7  
8  
9  
10  
11  
12  
13  
14  
15  
16  
17  
18  
19  
20  
21  
22  
23  
24  
25  
26  
27  
28  
29  
30  
31  
32  
33  
34  
35  
36  
37  
38  
39  
40  
41  
42  
43  
44  
45  
46  
47  
48  
49  
50  
51  
52  
53  
54  
55  
56  
57  
58  
59  
60

41. Wahl HW, Hoppmann CA, Ram N, et al. Healthy Aging-Relevant Goals: The Role of Person-Context Co-construction. *J Gerontol B Psychol Sci Soc Sci* 2021;76(Supplement\_2):S181-S90. doi: 10.1093/geronb/gbab089 [published Online First: 2021/09/14]

For peer review only

1  
2 **Figures (provided in separate files)**  
3

4  
5 **Figure 1. Factors indicated to have a strong influence on brain health**  
6

7  
8 *% indicates proportion of participants rating this factor as having a 'strong' or 'very strong' influence*  
9  
10 *on brain health, with the remainder of participants rating it as 'moderate', 'weak' or 'no influence'.*  
11

12  
13  
14  
15  
16 **Figure 2 – Life periods considered important to take care of one's brain**  
17

18  
19 *% indicates proportion of participants rating this life period as 'important' or 'very important', with*  
20 *the remainder of participants rating it as 'not important' or 'moderately important'.*  
21  
22

23  
24  
25  
26  
27 **Figure 3 – Diseases and disorders believed to be associated with the brain**  
28

29  
30 *% indicates proportion of participants rating this disorder or disease as 'associated with the brain',*  
31 *with the remainder of participants rating it as 'not associated with the brain'.*  
32  
33

34  
35  
36  
37  
38  
39  
40 **Supplementary material (provided in separate files)**  
41

42  
43 Supplementary material 1. Comparison of binary vs continuous outcome models  
44

45  
46 Supplementary material 2. Lifebrain Global Brain Health Survey. Detailed descriptive statistics  
47

48  
49 Supplementary material 3. All models tables  
50

51  
52 Supplementary material 4. Demographic characteristics across countries  
53

54  
55 Supplementary material 5. Lifebrain Global Brain Health Survey. Odd ratios and 95% confidence  
56  
57 intervals across all demographic characteristics  
58  
59  
60

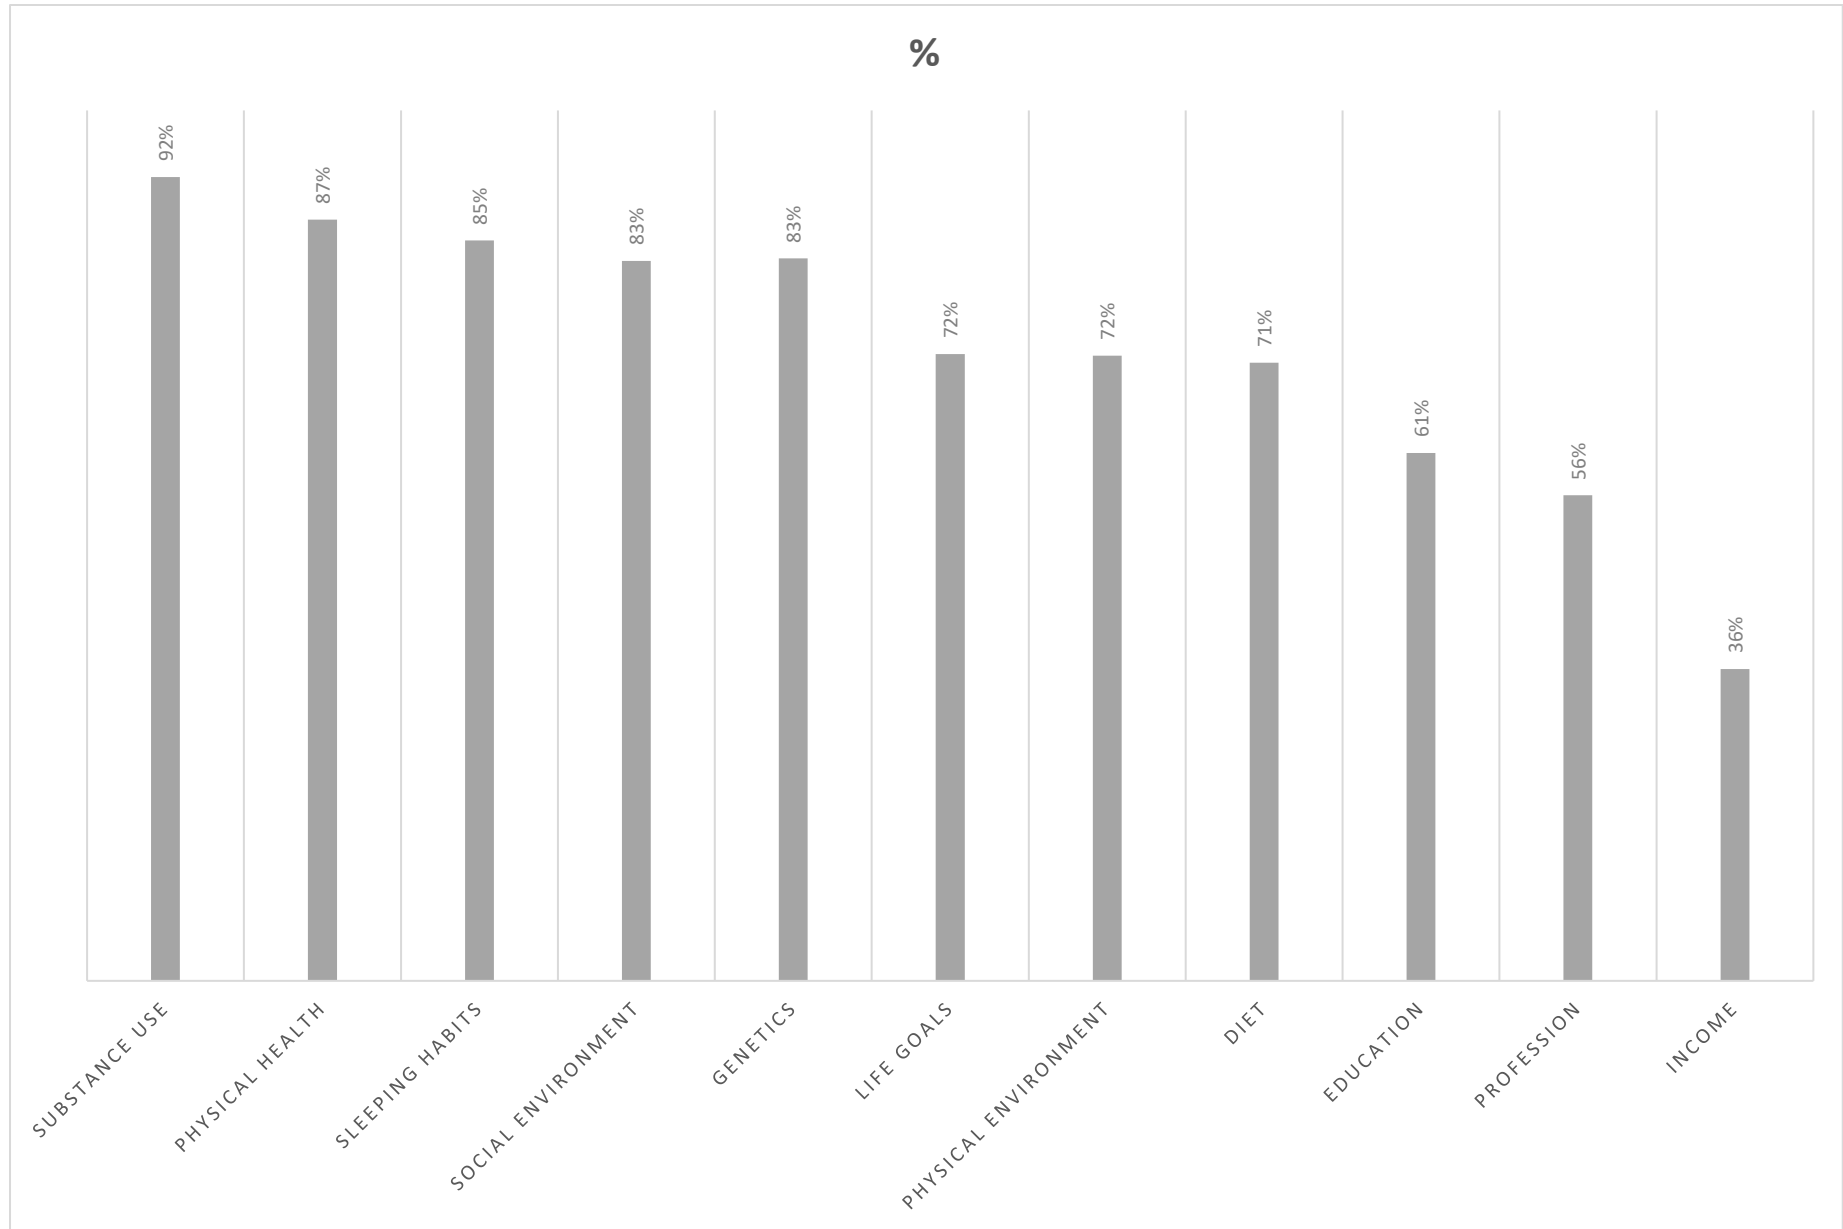

1  
2  
3  
4  
5  
6  
7  
8  
9  
10  
11  
12  
13  
14  
15  
16  
17  
18  
19  
20  
21  
22  
23  
24  
25  
26  
27  
28  
29  
30  
31  
32  
33  
34  
35  
36  
37  
38  
39  
40  
41  
42  
43  
44  
45  
46

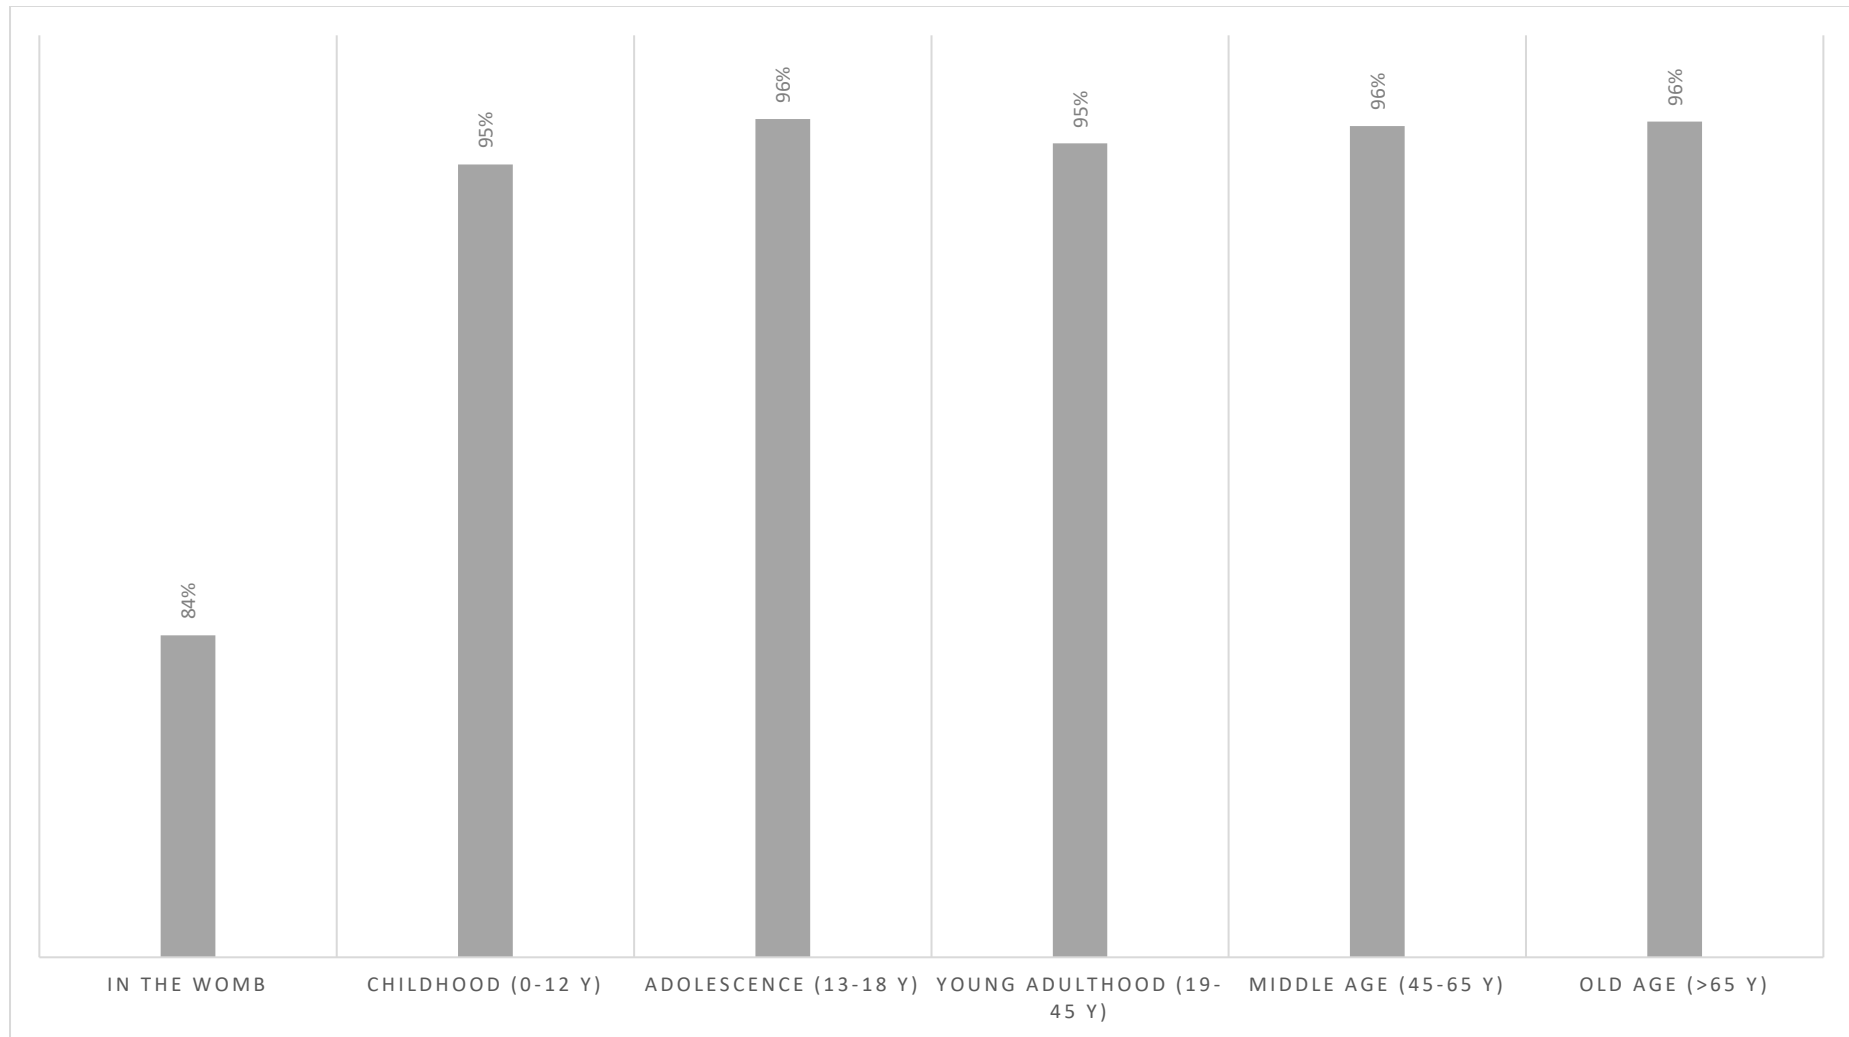

1  
2  
3  
4  
5  
6  
7  
8  
9  
10  
11  
12  
13  
14  
15  
16  
17  
18  
19  
20  
21  
22  
23  
24  
25  
26  
27  
28  
29  
30  
31  
32  
33  
34  
35  
36  
37  
38  
39  
40  
41  
42  
43  
44  
45  
46

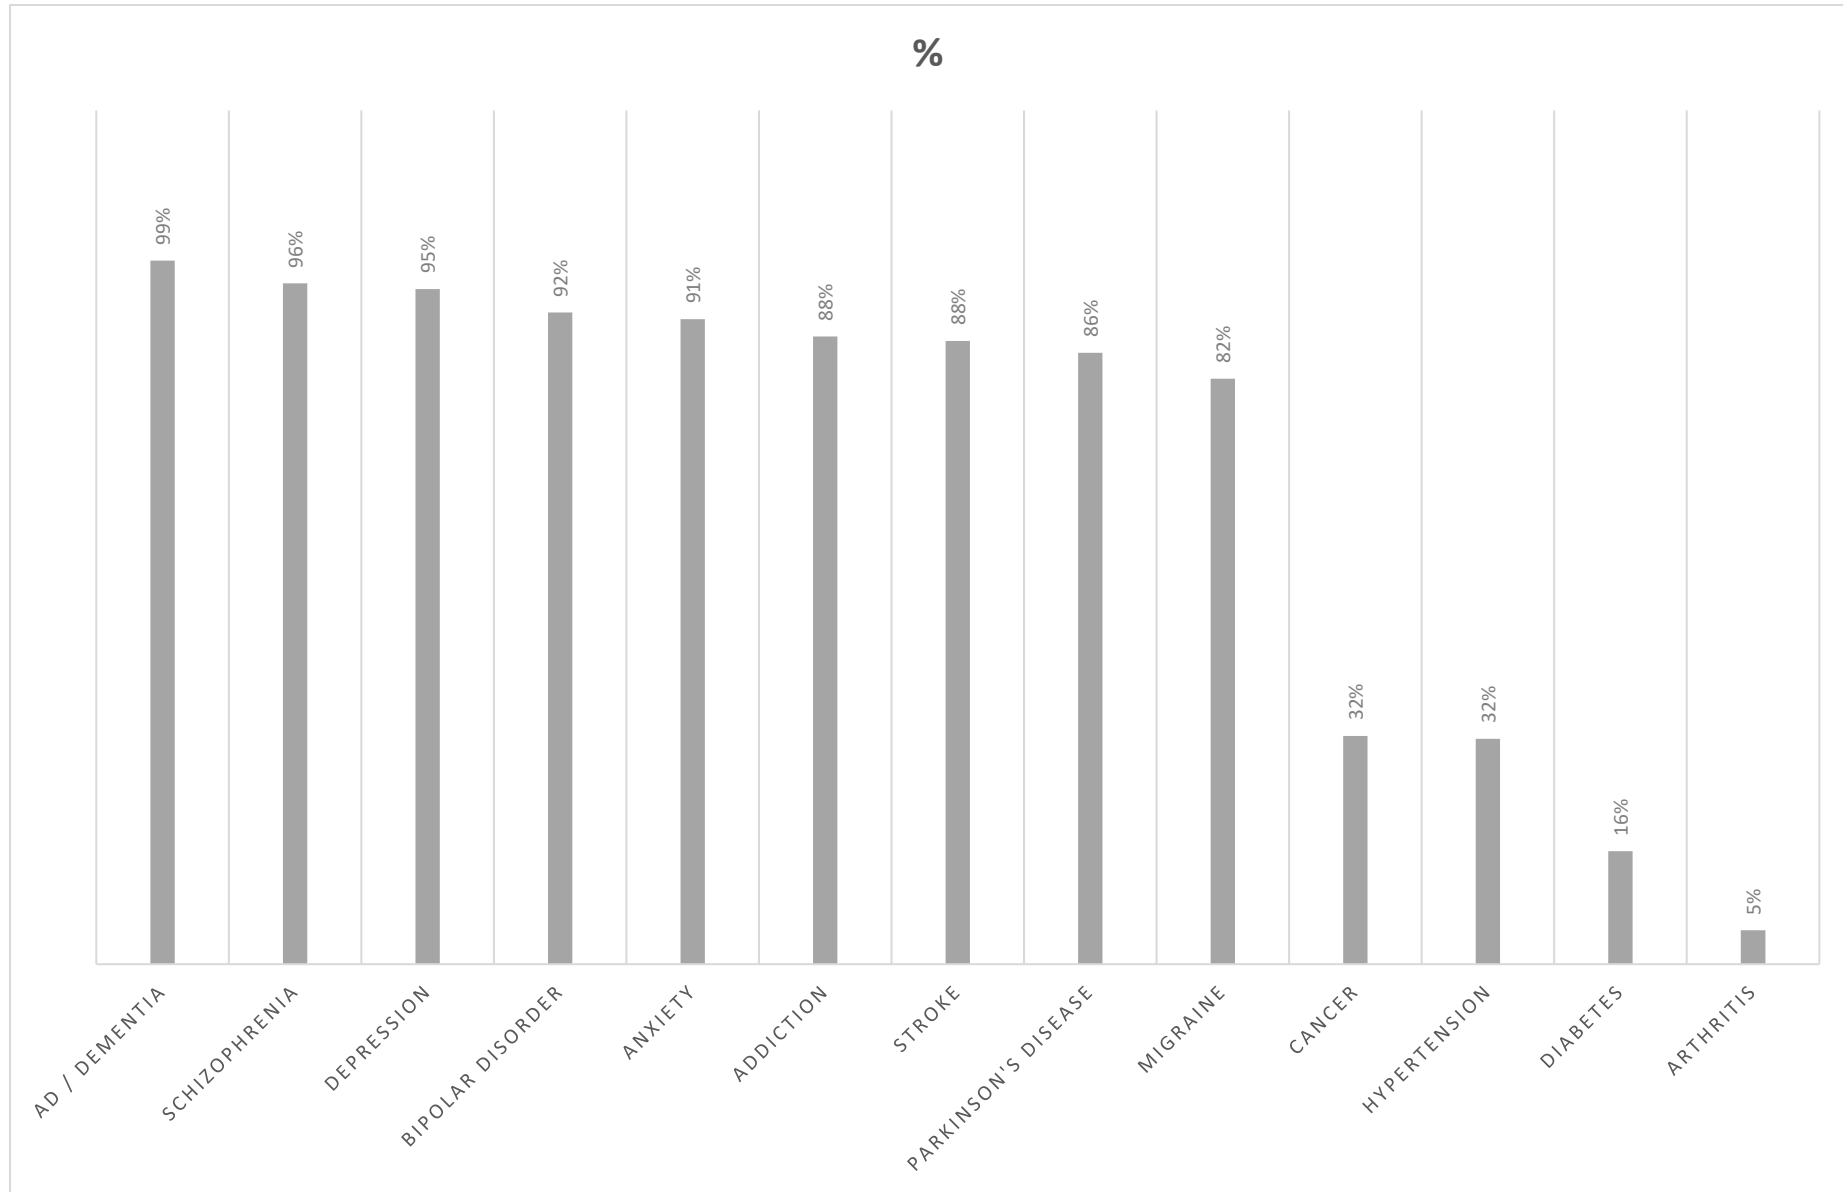

Table 1: Question 2: Comparison of binary vs. continuous outcome models.

| key             | fct                          | term              | Binary models |           |           |         | Continuous models |           |           |         |
|-----------------|------------------------------|-------------------|---------------|-----------|-----------|---------|-------------------|-----------|-----------|---------|
|                 |                              |                   | log odds      | std.error | statistic | p.value | beta              | std.error | statistic | p.value |
| Income          | cognitive_health             | Below average     | 0.039         | 0.053     | 0.745     | 0.456   | -0.061            | 0.023     | -2.635    | 0.008   |
| Income          | mental_health                | Below average     | 0.003         | 0.037     | 0.070     | 0.944   | -0.028            | 0.016     | -1.742    | 0.082   |
| Income          | relationship                 | Stable            | -0.001        | 0.025     | -0.052    | 0.958   | 0.001             | 0.011     | 0.093     | 0.926   |
| Education       | relationship                 | Stable            | 0.026         | 0.025     | 1.027     | 0.304   | -0.002            | 0.011     | -0.139    | 0.890   |
| Diet            | gender                       | Other/Undisclosed | -0.064        | 0.199     | -0.324    | 0.746   | 0.048             | 0.073     | 0.654     | 0.513   |
| Life goals      | age                          | 41-60             | -0.052        | 0.030     | -1.728    | 0.084   | 0.006             | 0.011     | 0.489     | 0.625   |
| Life goals      | relationship                 | Stable            | 0.012         | 0.027     | 0.451     | 0.652   | -0.010            | 0.010     | -0.931    | 0.352   |
| Sleeping habits | cognitive_health             | Below average     | -0.084        | 0.069     | -1.213    | 0.225   | 0.024             | 0.019     | 1.284     | 0.199   |
| Substance use   | brain_research_participation | Yes               | 0.004         | 0.046     | 0.088     | 0.930   | -0.018            | 0.009     | -2.004    | 0.045   |

<sup>a</sup> Models and groups where the sign of the beta (estimate) between continuous and binary outcome measures are in opposite directions. All these effects are tiny and none of them are significant even before adjustments for multiple comparisons.

Table 2: Question 3: Comparison of binary vs. continuous outcome models.

| key             | fct                          | term              | Binary models |           |           |         | Continuous models |           |           |         |
|-----------------|------------------------------|-------------------|---------------|-----------|-----------|---------|-------------------|-----------|-----------|---------|
|                 |                              |                   | log odds      | std.error | statistic | p.value | beta              | std.error | statistic | p.value |
| In the womb     | brain_research_participation | Yes               | -0.035        | 0.033     | -1.049    | 0.294   | 0.004             | 0.011     | 0.422     | 0.673   |
| Childhood       | brain_disease_caregiver      | Yes               | 0.016         | 0.055     | 0.293     | 0.769   | -0.003            | 0.007     | -0.414    | 0.679   |
| Childhood       | gender                       | Other/Undisclosed | -0.116        | 0.420     | -0.275    | 0.783   | 0.042             | 0.053     | 0.801     | 0.423   |
| Childhood       | mental_health                | Below average     | -0.037        | 0.080     | -0.459    | 0.646   | 0.023             | 0.011     | 2.170     | 0.030   |
| Adolescence     | brain_disease_caregiver      | Yes               | -0.001        | 0.067     | -0.022    | 0.982   | 0.004             | 0.007     | 0.658     | 0.510   |
| Adolescence     | brain_research_participation | Yes               | -0.046        | 0.067     | -0.681    | 0.496   | 0.001             | 0.007     | 0.086     | 0.932   |
| Adolescence     | gender                       | Other/Undisclosed | -0.292        | 0.458     | -0.636    | 0.525   | 0.047             | 0.049     | 0.944     | 0.345   |
| Adolescence     | illness_experience           | Yes               | -0.008        | 0.068     | -0.118    | 0.906   | 0.008             | 0.007     | 1.186     | 0.235   |
| Adolescence     | mental_health                | Below average     | -0.110        | 0.095     | -1.156    | 0.248   | 0.023             | 0.010     | 2.322     | 0.020   |
| Young adulthood | brain_research_participation | Yes               | -0.045        | 0.058     | -0.766    | 0.444   | 0.020             | 0.007     | 2.778     | 0.005   |
| Young adulthood | education                    | Lower             | 0.054         | 0.063     | 0.860     | 0.390   | -0.014            | 0.008     | -1.854    | 0.064   |
| Young adulthood | relationship                 | Stable            | 0.069         | 0.058     | 1.188     | 0.235   | -0.005            | 0.007     | -0.665    | 0.506   |

<sup>a</sup> Models and groups where the sign of the beta (estimate) between continuous and binary outcome measures are in opposite directions. All these effects are tiny and none of them are significant even before adjustments for multiple comparisons.

# Lifebbrain Global Brain Health Survey

for country: all

## Contents

|          |                                            |           |
|----------|--------------------------------------------|-----------|
| <b>1</b> | <b>Question 1</b>                          | <b>2</b>  |
| 1.1      | Overall . . . . .                          | 2         |
| 1.2      | Gender . . . . .                           | 3         |
| 1.3      | Age groups . . . . .                       | 4         |
| 1.4      | Education . . . . .                        | 5         |
| 1.5      | Country . . . . .                          | 6         |
| 1.6      | Health experience/education . . . . .      | 7         |
| 1.7      | Cognitive health . . . . .                 | 8         |
| 1.8      | Mental health . . . . .                    | 9         |
| 1.9      | Illness . . . . .                          | 10        |
| 1.10     | Brain disease care . . . . .               | 11        |
| 1.11     | Research participation . . . . .           | 12        |
| <b>2</b> | <b>Question 2</b>                          | <b>12</b> |
| 2.1      | Overall . . . . .                          | 12        |
| 2.2      | Gender . . . . .                           | 13        |
| 2.3      | Age groups . . . . .                       | 13        |
| 2.4      | Education . . . . .                        | 14        |
| 2.5      | Country . . . . .                          | 15        |
| 2.6      | Health care experience/education . . . . . | 16        |
| 2.7      | Cognitive health . . . . .                 | 16        |
| 2.8      | Mental health . . . . .                    | 17        |
| 2.9      | Illness . . . . .                          | 17        |
| 2.10     | Brain disease care . . . . .               | 18        |
| 2.11     | Research participation . . . . .           | 18        |
| <b>3</b> | <b>Question 3</b>                          | <b>19</b> |
| 3.1      | Overall . . . . .                          | 19        |
| 3.2      | Gender . . . . .                           | 20        |
| 3.3      | Age groups . . . . .                       | 21        |
| 3.4      | Education . . . . .                        | 22        |
| 3.5      | Country . . . . .                          | 23        |
| 3.6      | Health care experience/education . . . . . | 24        |
| 3.7      | Cognitive health . . . . .                 | 25        |
| 3.8      | Mental health . . . . .                    | 26        |
| 3.9      | Illness . . . . .                          | 27        |
| 3.10     | Brain disease care . . . . .               | 28        |
| 3.11     | Research participation . . . . .           | 29        |

# 1 Question 1

## 1.1 Overall

Ratings of life periods to take care of one's brain  
In order of rated importance

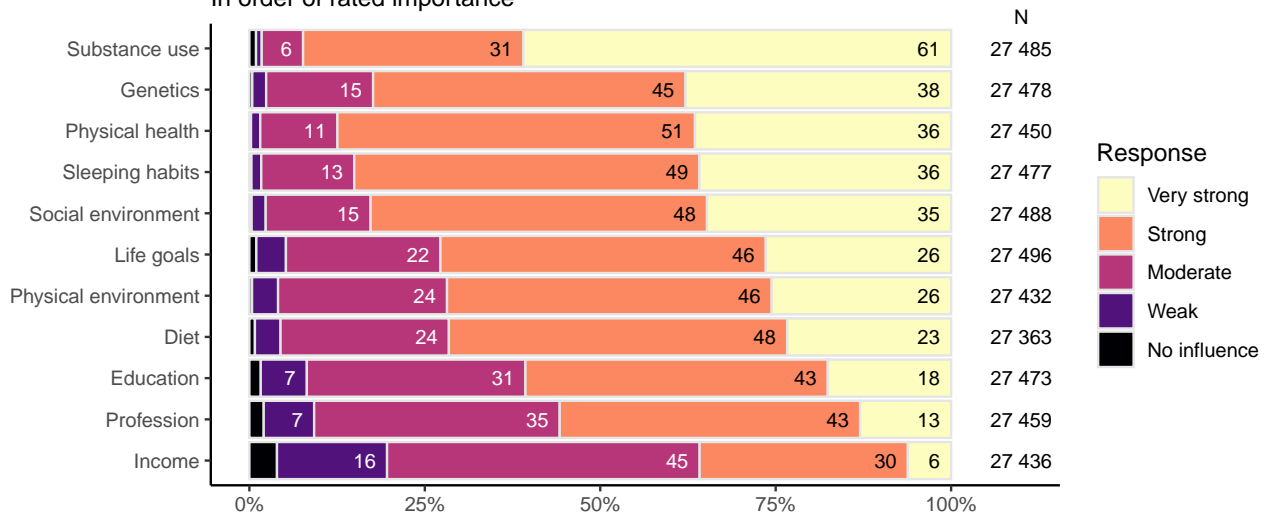

Question 1 asked respondents to rate on a 5-level likert-scale how strongly different life periods influence brain health.

For peer review only



## 1.2 Gender

Ratings of life periods to take care of one's brain by gender

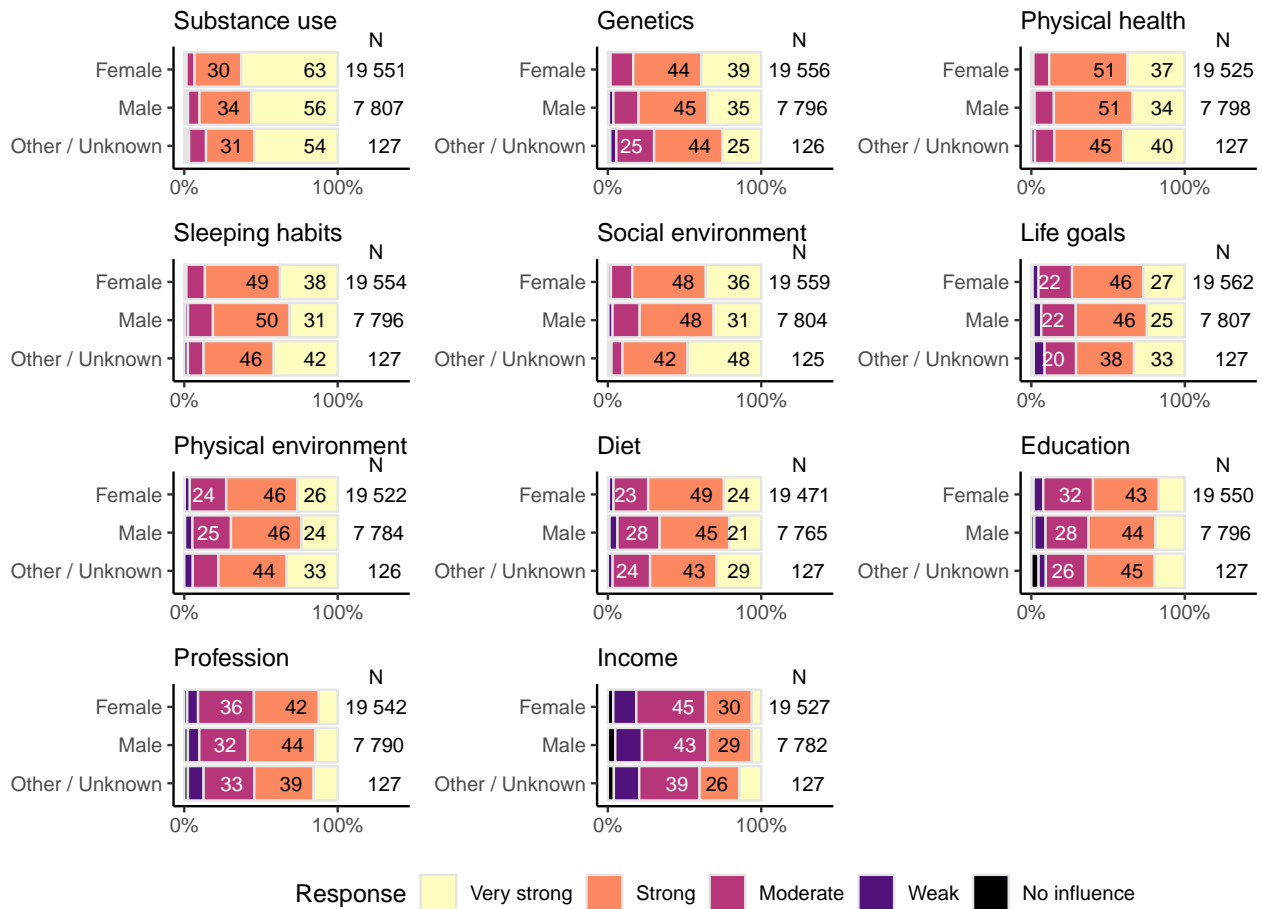

Question 1 asked respondents to rate on a 5-level likert-scale how strongly different life periods influence brain health. Here divided by respondent gender. Categories with less than 20% of the responses do not have percentages shown. Subplots are ordered by total rated importance across all groups.

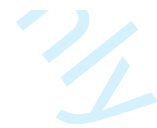

### 1.3 Age groups

#### Ratings of life periods to take care of one's brain by age groups

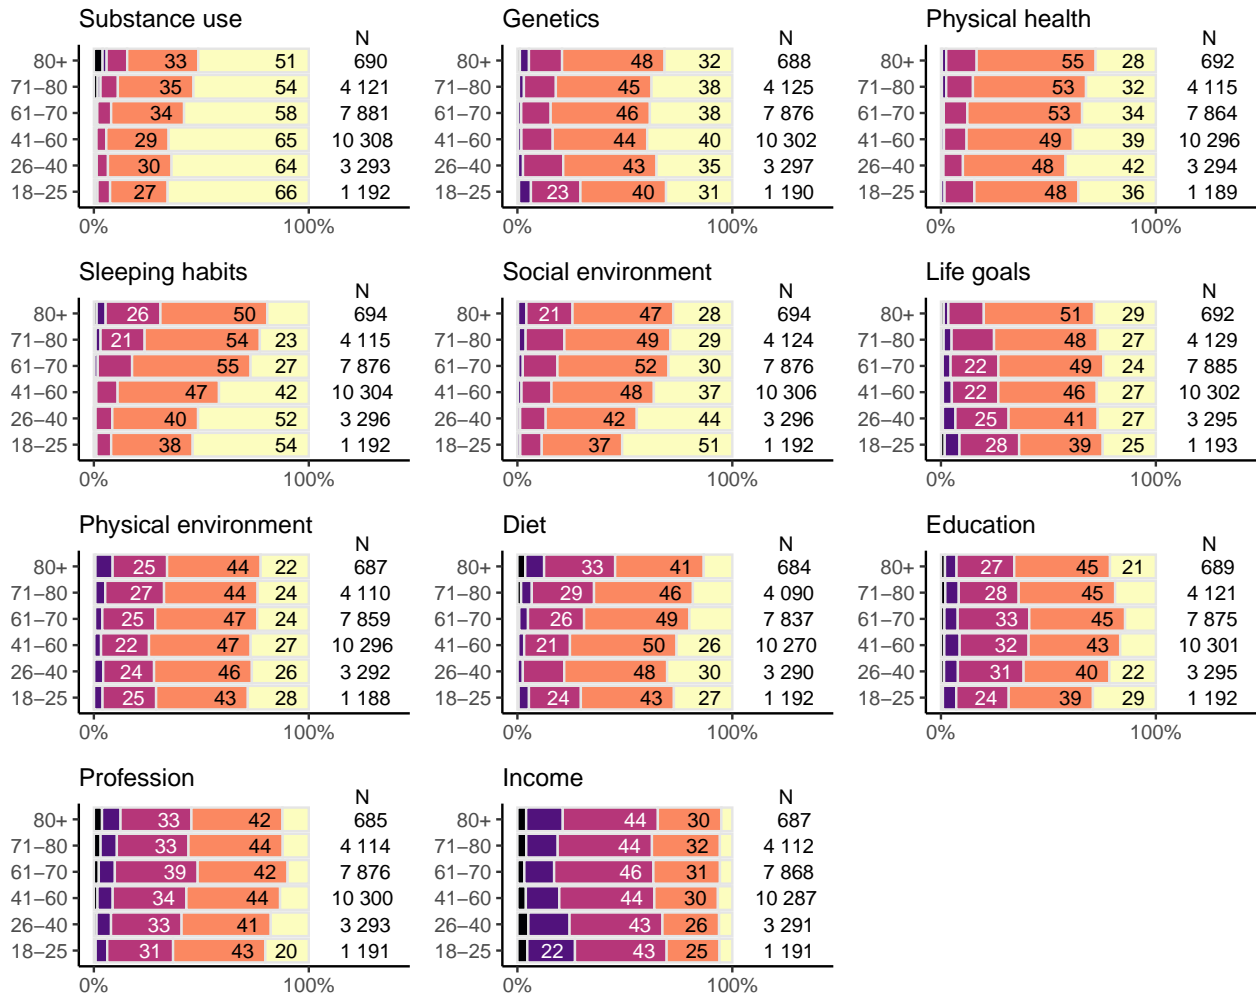

Response  Very strong  Strong  Moderate  Weak  No influence

Question 1 asked respondents to rate on a 5-level likert-scale how strongly different life periods influence brain health. Here divided by respondent age group. Categories with less than 20% of the responses do not have percentages shown. Subplots are ordered by total rated importance across all groups

### 1.4 Education

Ratings of life periods to take care of one's brain by educational level

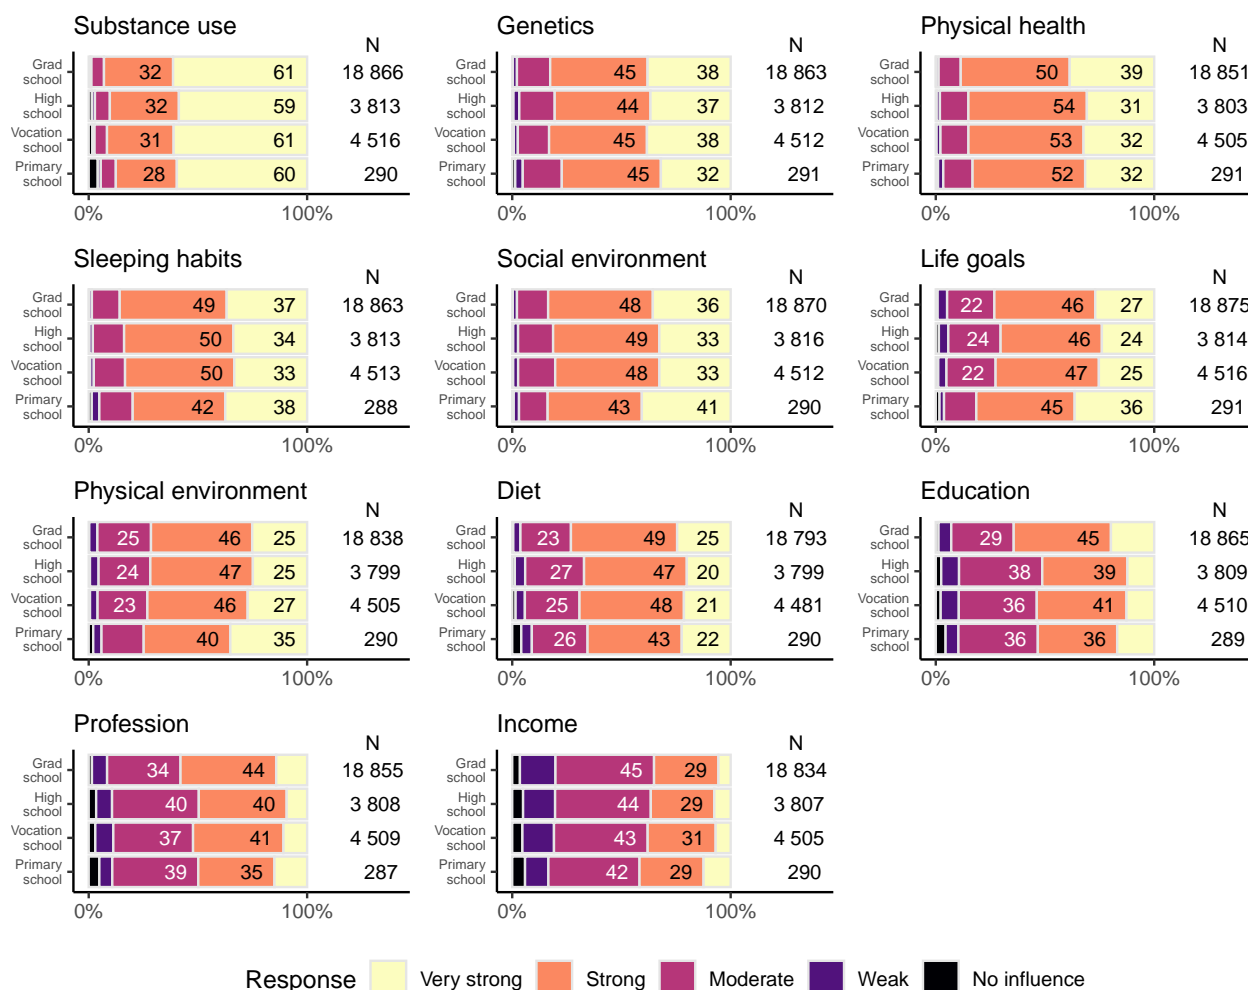

Question 1 asked respondents to rate on a 5-level likert-scale how strongly different life periods influence brain health. Here divided by respondent self-reported education level. Categories with less than 20% of the responses do not have percentages shown. Subplots are ordered by total rated importance across all groups

### 1.5 Country

Ratings of life periods to take care of one's brain by country of residence

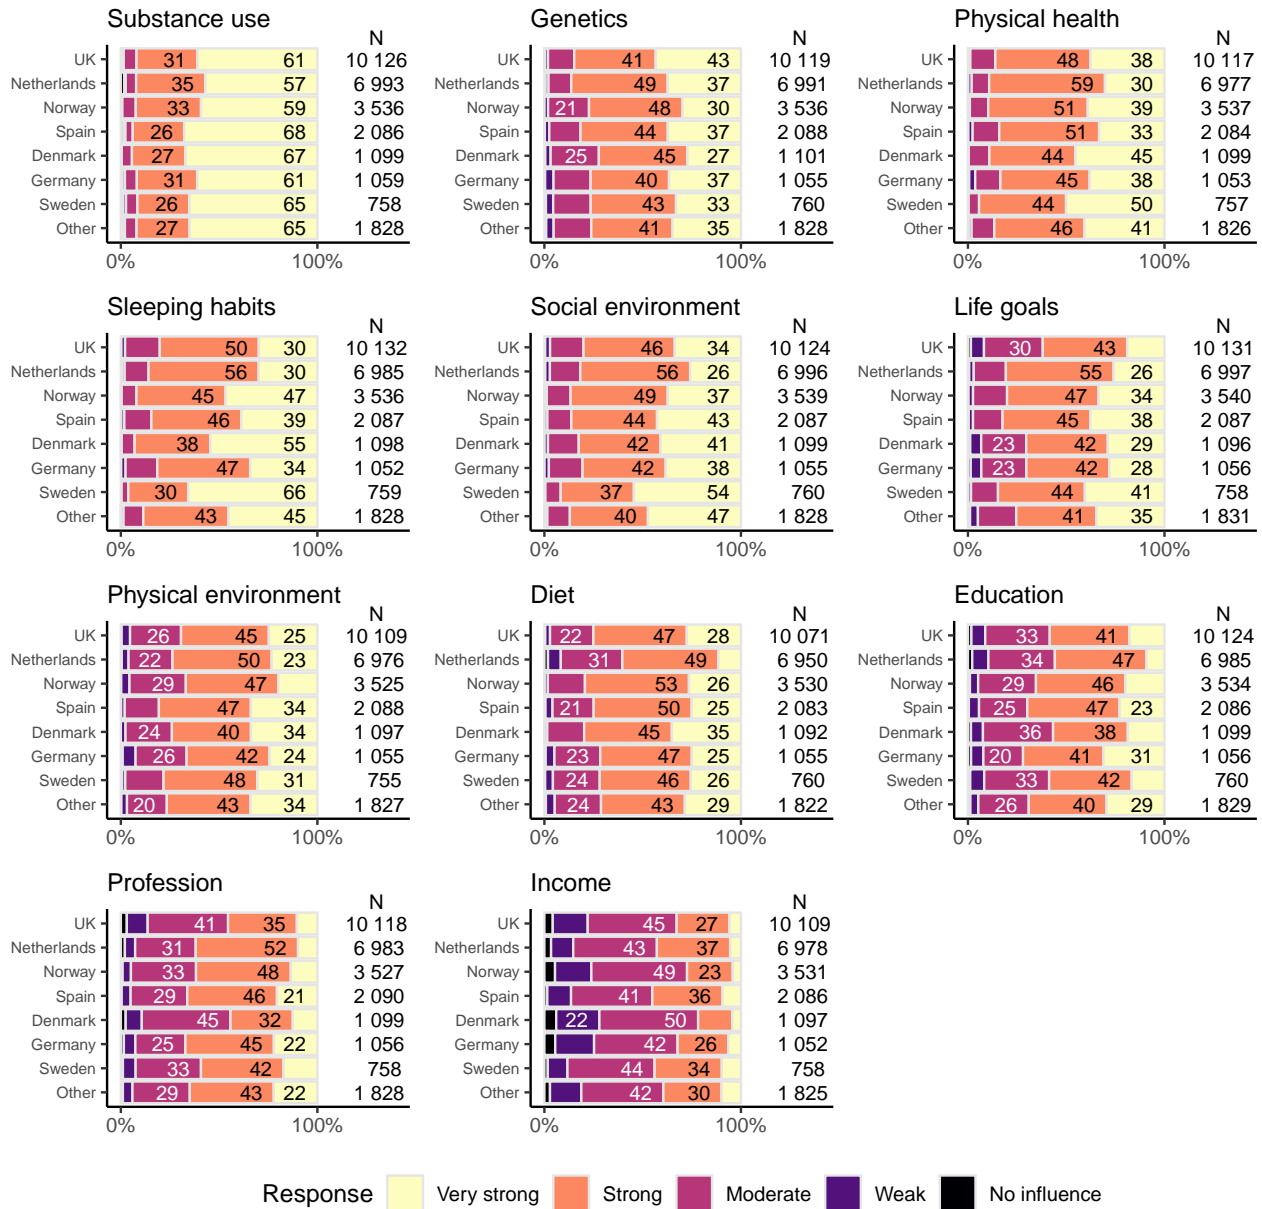

Question 1 asked respondents to rate on a 5-level likert-scale how strongly different life periods influence brain health. Here divided by respondent self-reported country of residence, showing the 7 countries with the most responses while all other countries are represented in 'Other'. Categories with less than 20% of the responses do not have percentages shown. Subplots are ordered by total rated importance across all groups

## 1.6 Health experience/education

### Ratings of life periods to take care of one's brain

By reported education or work experience in health care

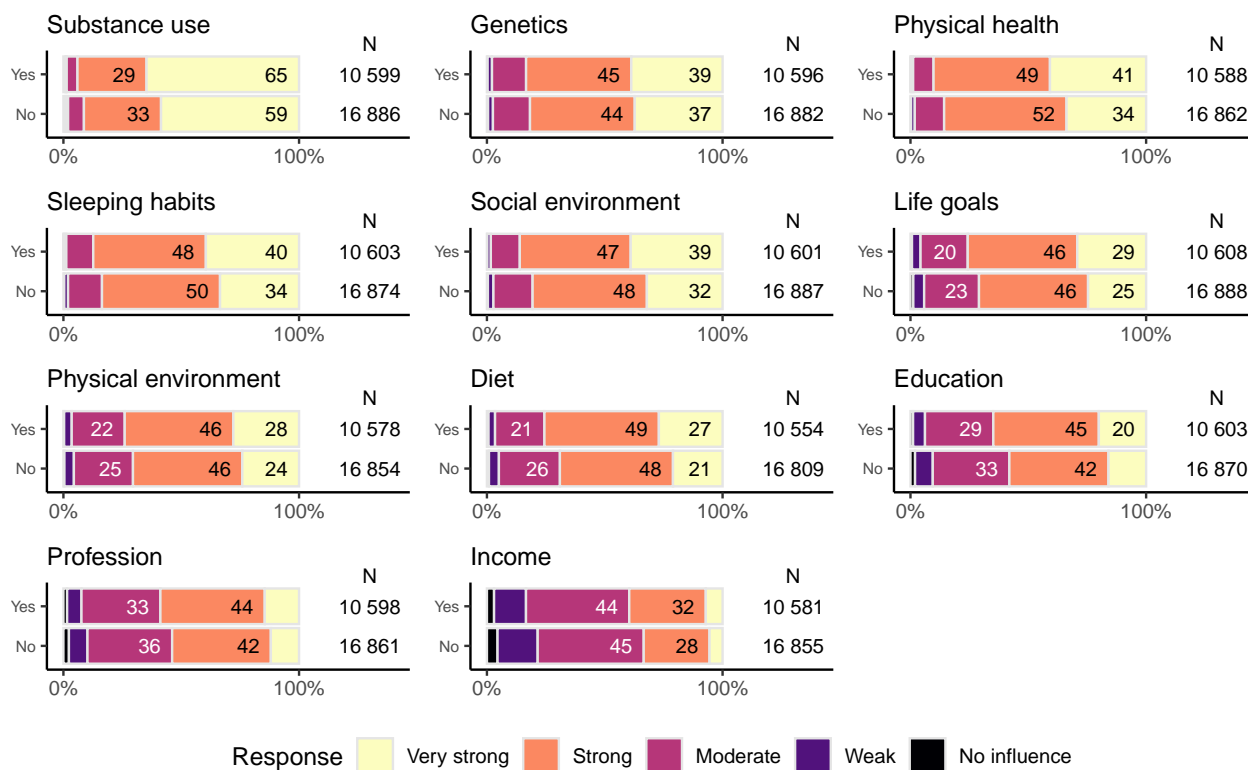

Question 1 asked respondents to rate on a 5-level likert-scale how strongly different life periods influence brain health. Here divided by having education or work experience in health care. Categories with less than 20% of the responses do not have percentages shown.

### 1.7 Cognitive health

Ratings of life periods to take care of one's brain  
by self-reported rating of cognitive health

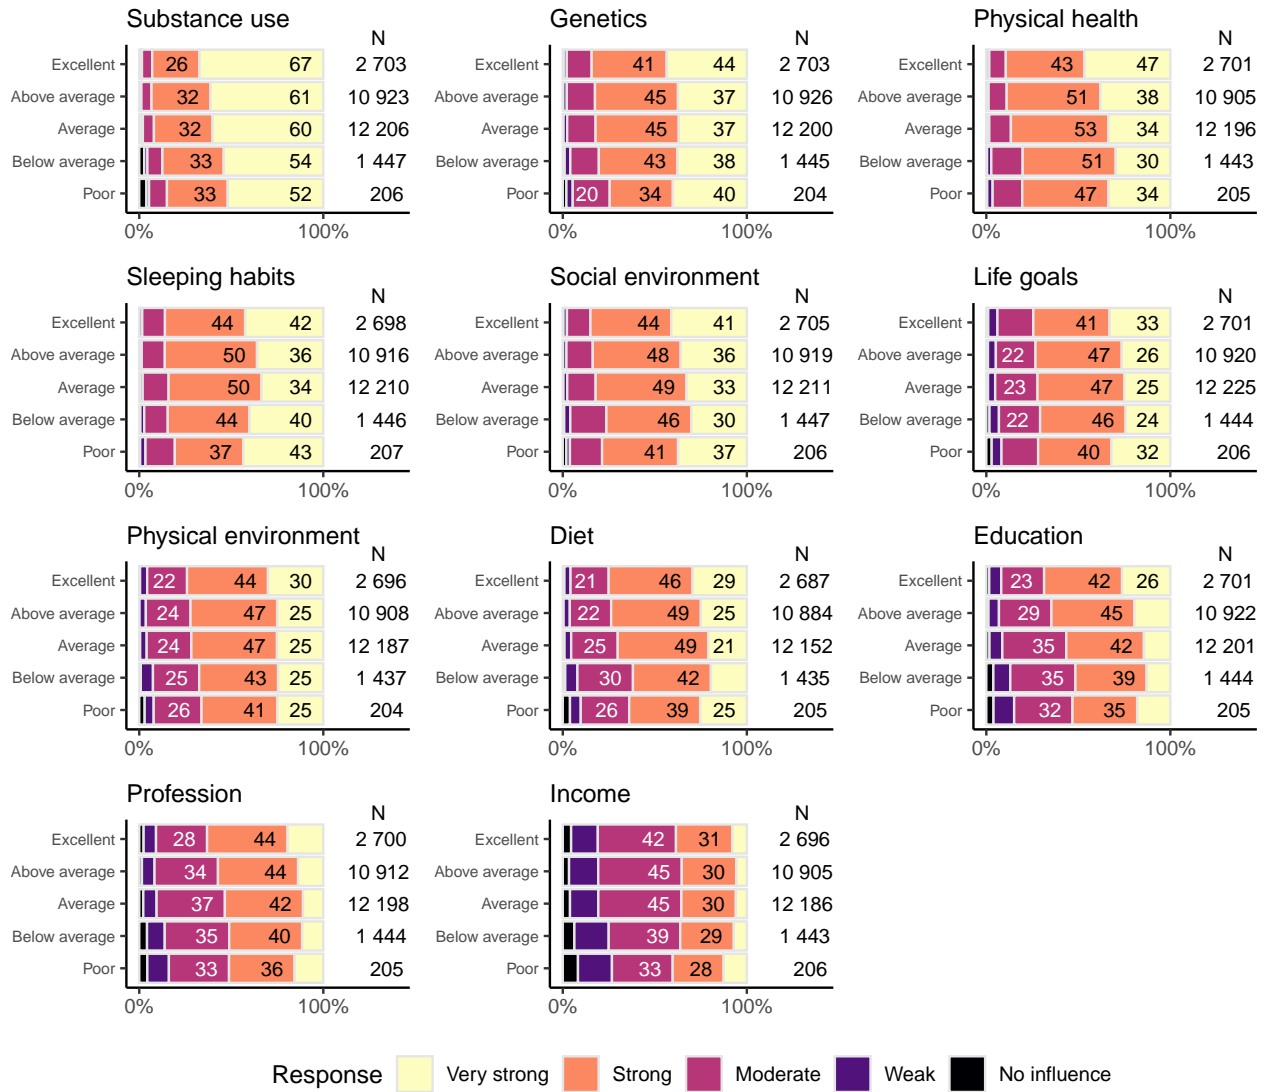

Question 1 asked respondents to rate on a 5-level likert-scale how strongly different life periods influence brain health. Here divided by self-reported rating of cognitive health. Categories with less than 20% of the responses do not have percentages shown.

## 1.8 Mental health

Ratings of life periods to take care of one's brain  
by self-reported rating of mental health

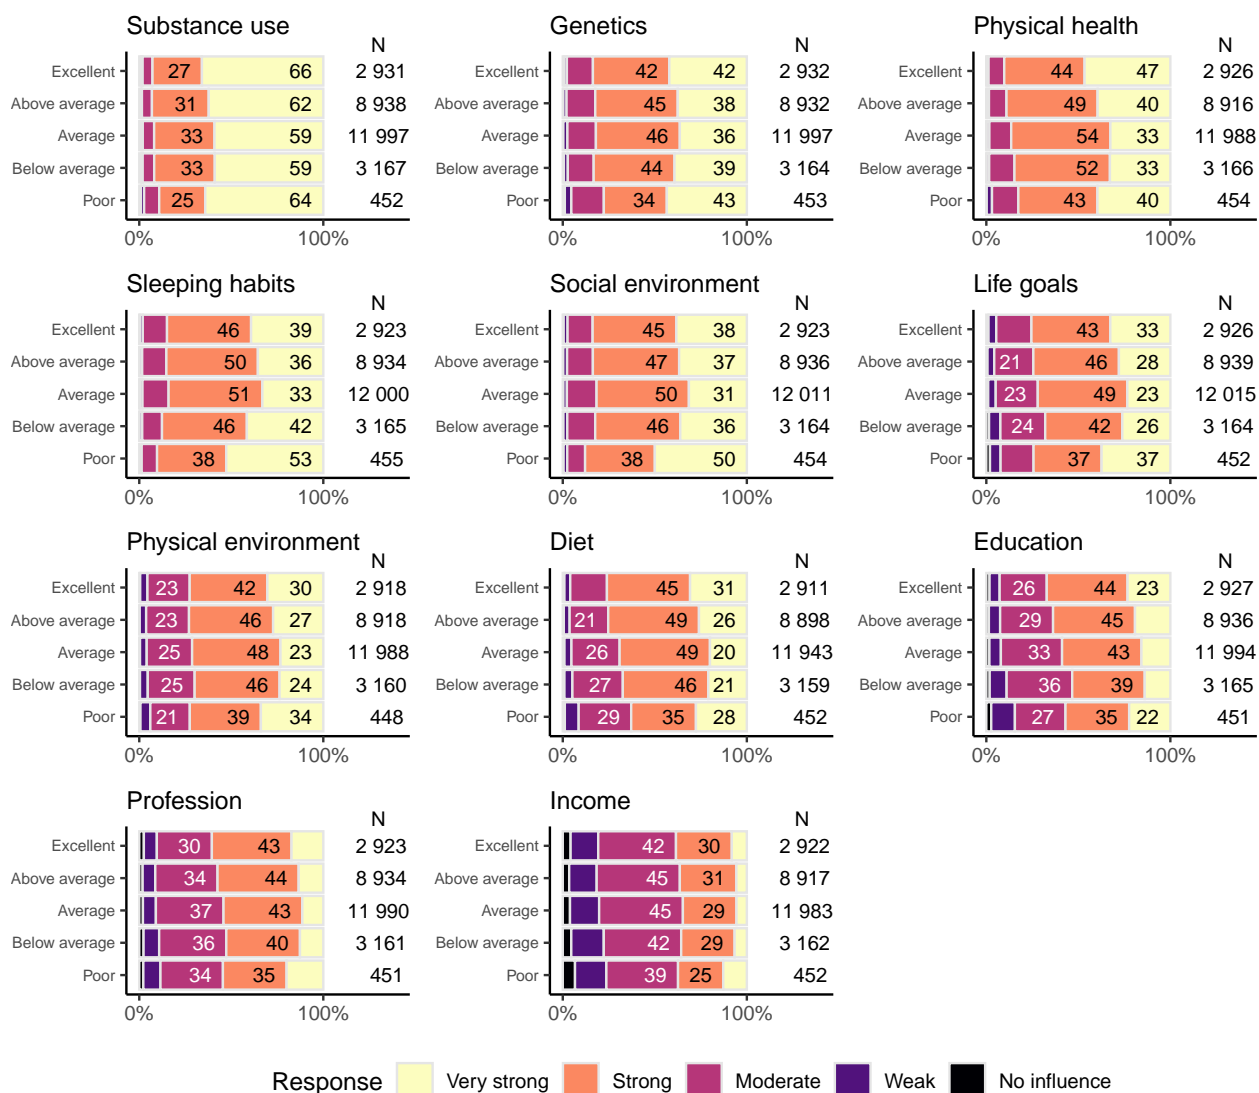

Question 1 asked respondents to rate on a 5-level likert-scale how strongly different life periods influence brain health. Here divided by self-reported rating of mental health. Categories with less than 20% of the responses do not have percentages shown.

### 1.9 Illness

#### Ratings of life periods to take care of one's brain

by experience of long-standing illness, disability, or health problem

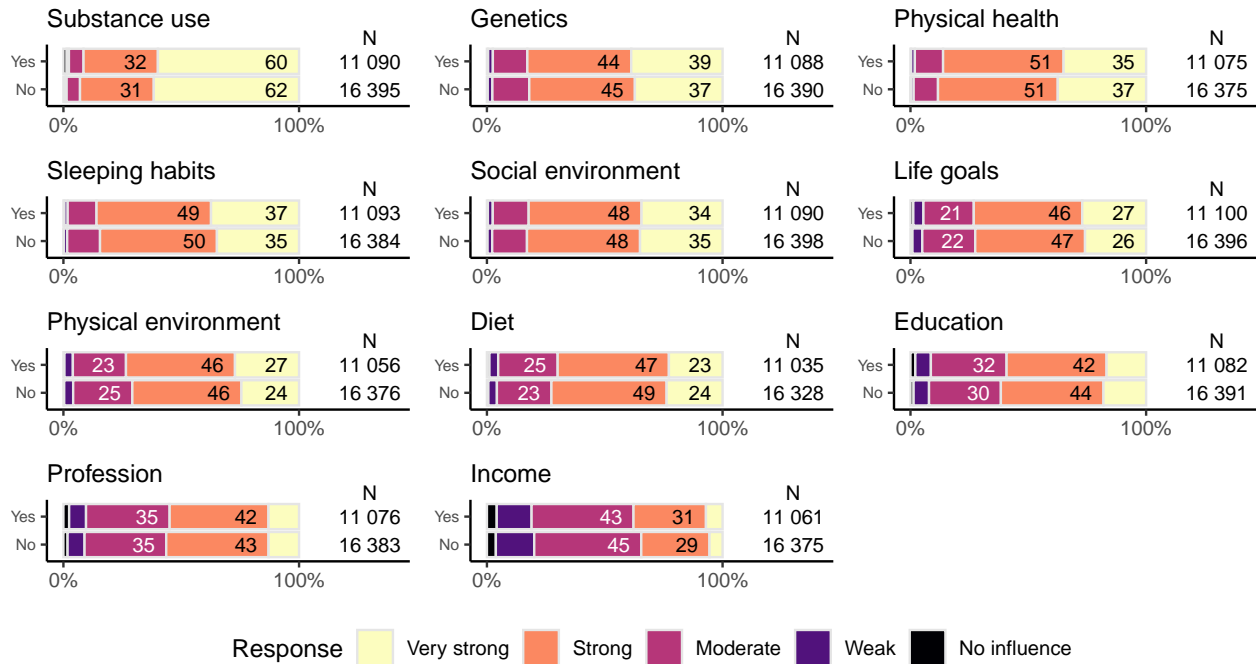

Question 1 asked respondents to rate on a 5-level likert-scale how strongly different life periods influence brain health. Here divided by whether they had experience with long-standing illness, disability, or health problem. Categories with less than 20% of the responses do not have percentages shown.



### 1.10 Brain disease care

#### Ratings of life periods to take care of one's brain

by experience of taking care of family member with brain disease

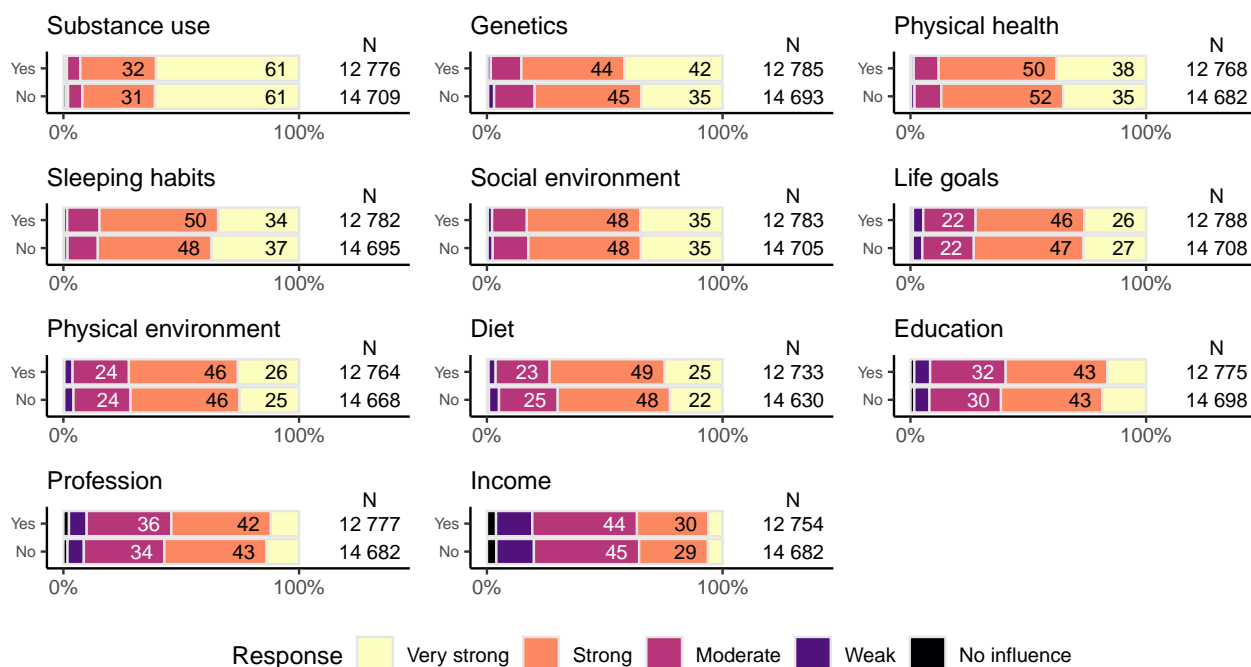

Question 1 asked respondents to rate on a 5-level likert-scale how strongly different life periods influence brain health. Here divided by whether they had experience with looking after a member of family with brain disease. Categories with less than 20% of the responses do not have percentages shown.

View only

### 1.11 Research participation

#### Ratings of life periods to take care of one's brain

By experience of brain research participation

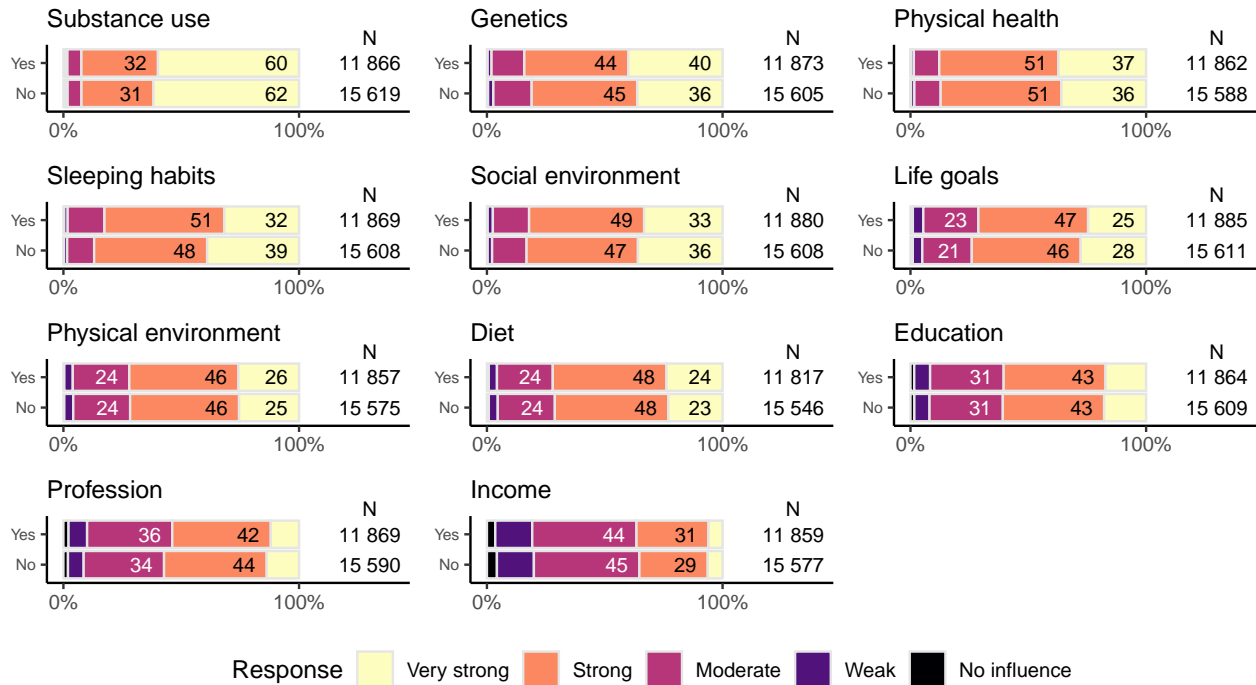

Question 1 asked respondents to rate on a 5-level likert-scale how strongly different life periods influence brain health. Here divided by whether they have participated in brain research projects. Categories with less than 20% of the responses do not have percentages shown.

## 2 Question 2

### 2.1 Overall

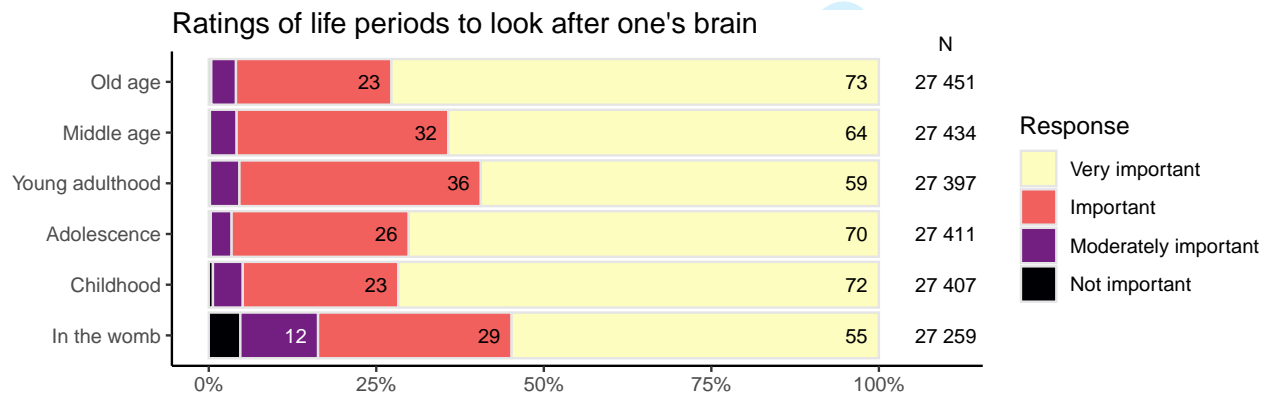

Question 2 asked respondents to rate on a 4-level scale at which life stages it is important to look after one's brain health. In the womb (before birth); Childhood (0-12 years); Adolescence (13-18 years); Young adulthood (19...45 years); Middle age (45-65 years); Old age (over 65 years)

## 2.2 Gender

Ratings of life periods to look after one...s brain  
by gender

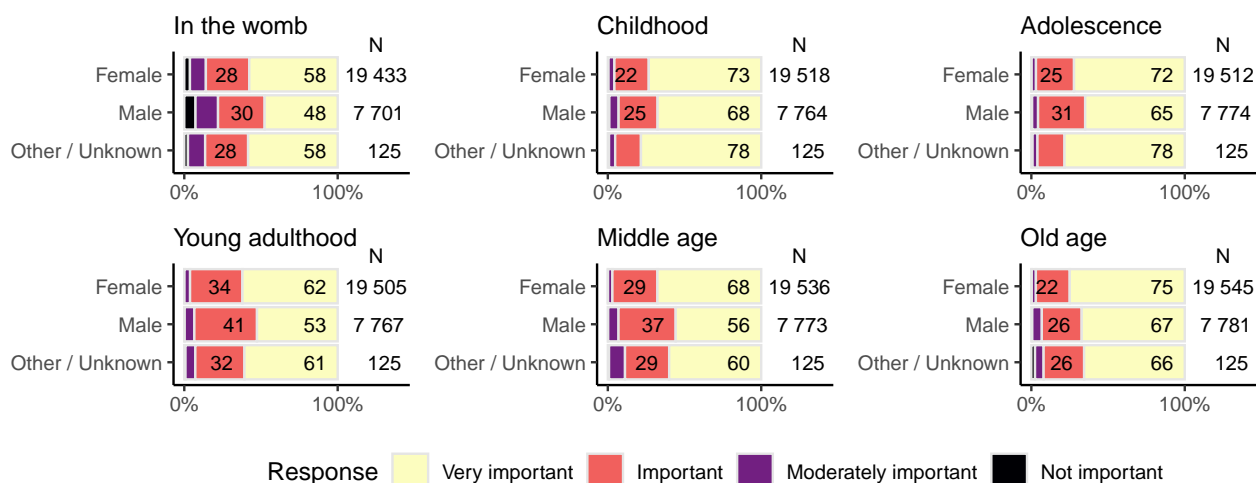

Question 2 asked respondents to rate on a 4-level scale at which life stages it is important to look after one's brain health. Here divided by respondents gender. Categories with less than 20% of the responses do not have percentages shown. In the womb (before birth); Childhood (0–12 years); Adolescence (13–18 years); Young adulthood (19...45 years); Middle age (45–65 years); Old age (over 65 years)

## 2.3 Age groups

Ratings of life periods to look after one...s brain  
by age groups

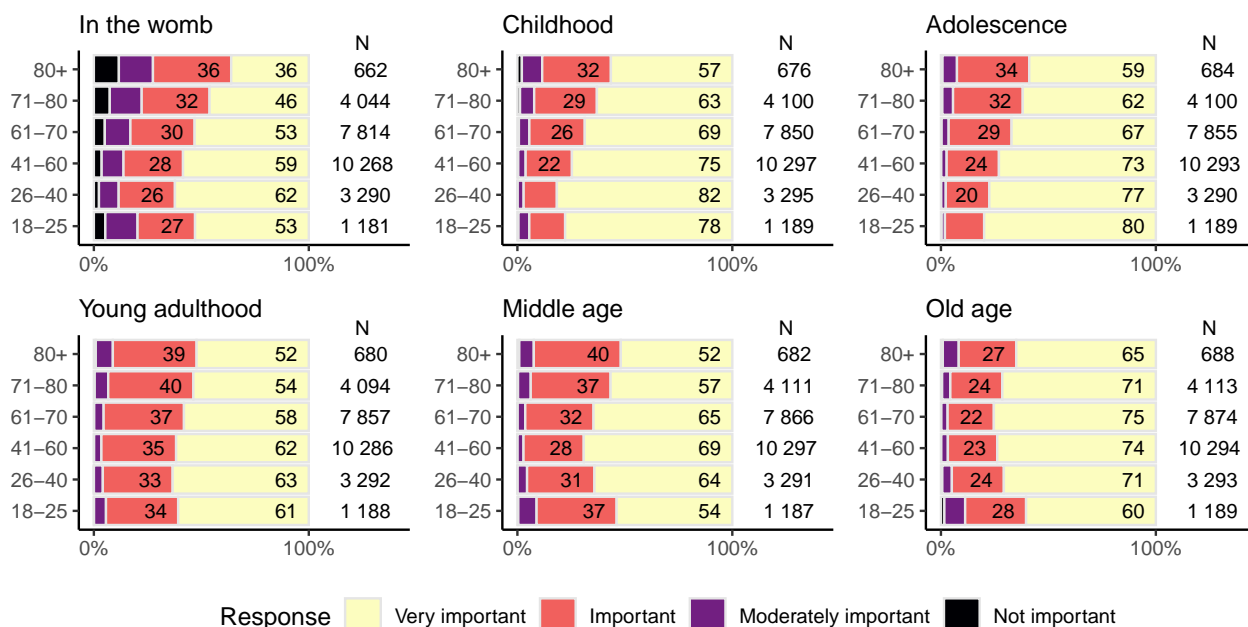

Question 2 asked respondents to rate on a 4-level scale at which life stages it is important to look after one's brain health. Here divided by respondent age group. Categories with less than 20% of the responses do not have percentages shown. In the womb (before birth); Childhood (0–12 years); Adolescence (13–18 years); Young adulthood (19...45 years); Middle age (45–65 years); Old age (over 65 years)

## 2.4 Education

Ratings of life periods to look after one...s brain  
by educational level

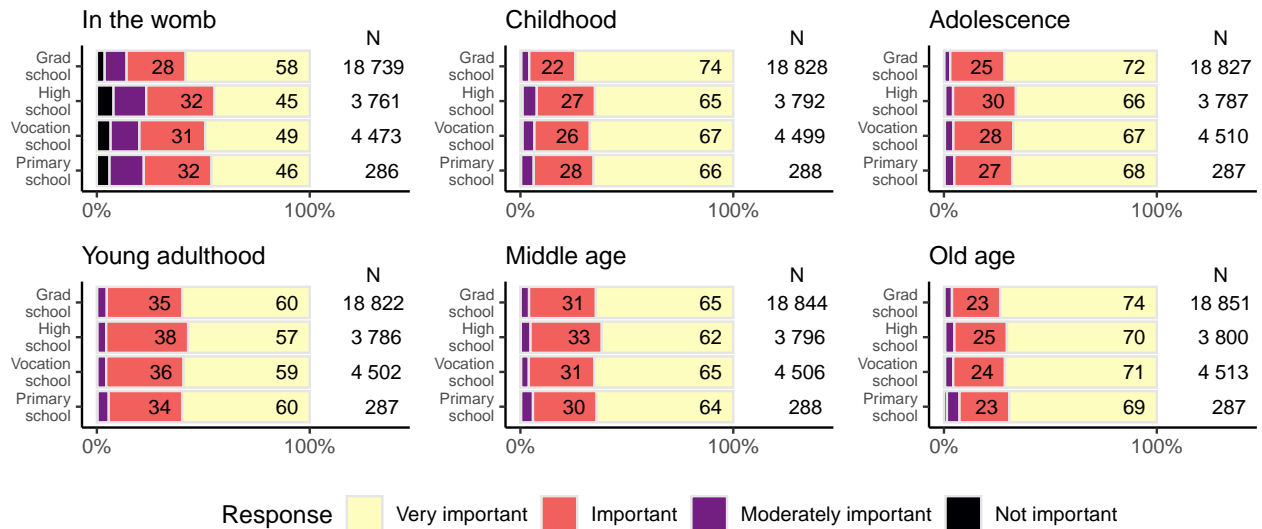

Question 2 asked respondents to rate on a 5-level likert-scale at which life stages it is important to look after one's brain health. Here divided by respondent self-reported education level. Categories with less than 20% of the responses do not have percentages shown. In the womb (before birth); Childhood (0-12 years); Adolescence (13-18 years); Young adulthood (19...45 years); Middle age (45-65 years); Old age (over 65 years)

## 2.5 Country

Ratings of life periods to look after one...s brain  
by country of residence

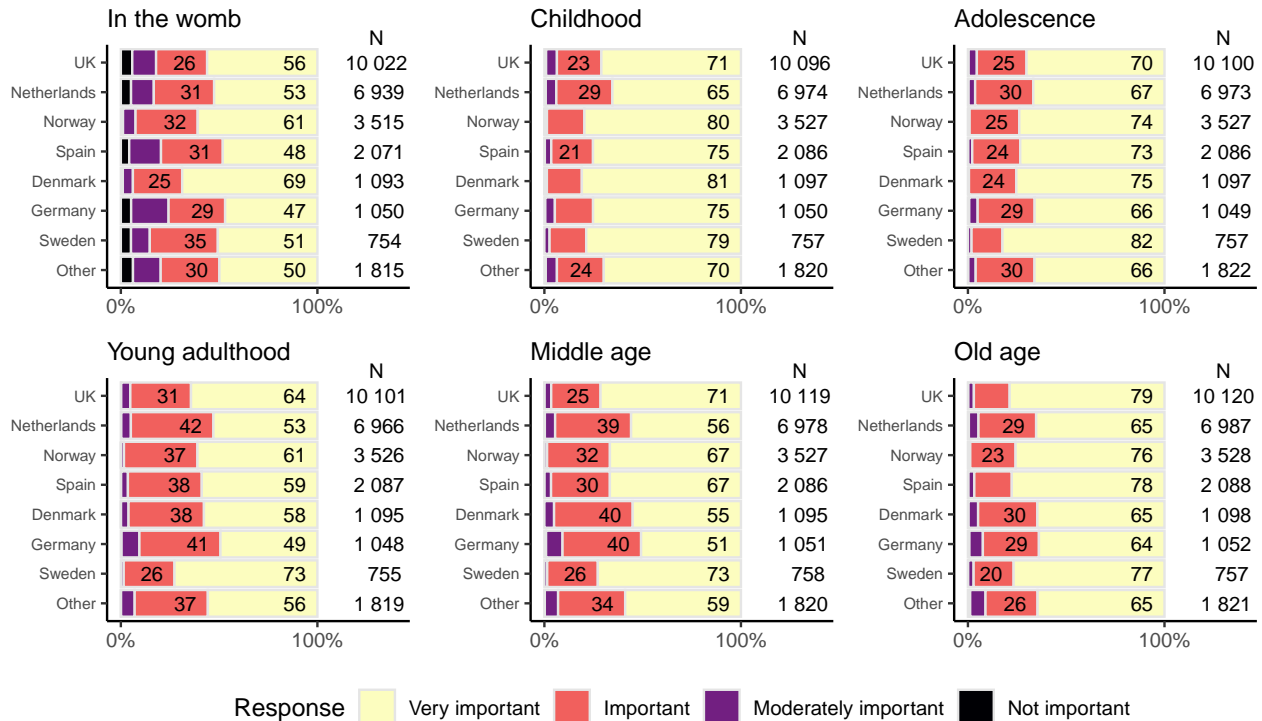

Question 2 asked respondents to rate on a 5-level likert-scale at which life stages it is important to look after one's brain health. Here divided by respondent self-reported country of residence. Categories with less than 20% of the responses do not have percentages shown. In the womb (before birth); Childhood (0-12 years); Adolescence (13-18 years); Young adulthood (19...45 years); Middle age (45-65 years); Old age (over 65 years)

## 2.6 Health care experience/education

Ratings of life periods to look after one...s brain  
by reported education or work experience in health care...

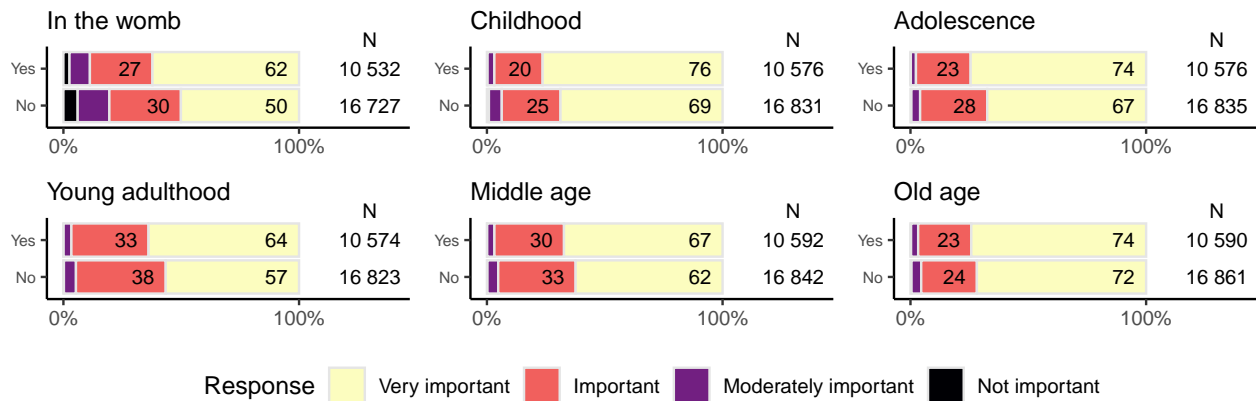

Question 2 asked respondents to rate on a 5-level likert-scale at which life stages it is important to look after one's brain health. Here divided by having education or work experience caring for persons with brain disease. Categories with less than 20% of the responses do not have percentages shown. In the womb (before birth); Childhood (0–12 years); Adolescence (13–18 years); Young adulthood (19...45 years); Middle age (45–65 years); Old age (over 65 years)

## 2.7 Cognitive health

Ratings of life periods to look after one...s brain  
by self-reported rating of cognitive health

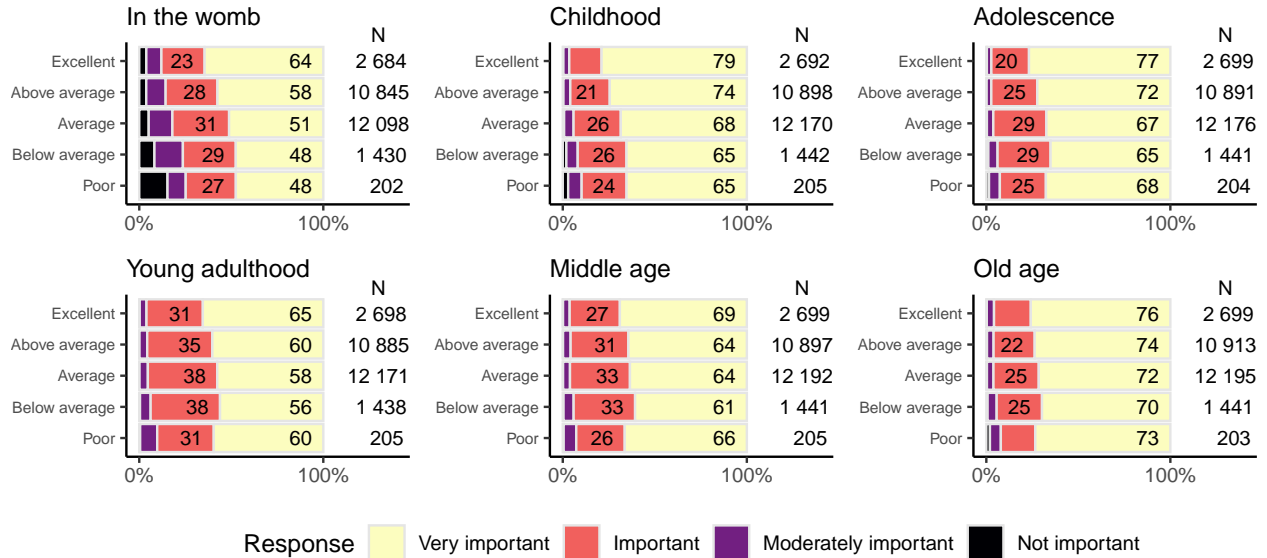

Question 2 asked respondents to rate on a 5-level likert-scale at which life stages it is important to look after one's brain health. Here divided by self-reported rating of cognitive health. Categories with less than 20% of the responses do not have percentages shown. In the womb (before birth); Childhood (0–12 years); Adolescence (13–18 years); Young adulthood (19...45 years); Middle age (45–65 years); Old age (over 65 years)

## 2.8 Mental health

Ratings of life periods to look after one...s brain  
by self-reported rating of mental health

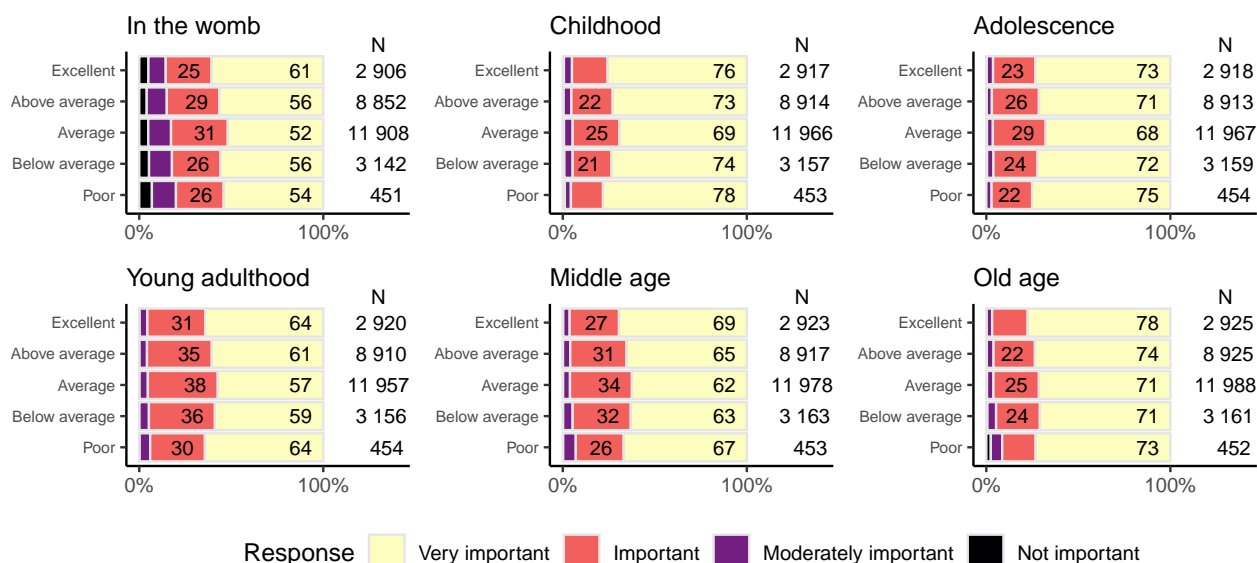

Question 2 asked respondents to rate on a 5-level likert-scale at which life stages it is important to look after one's brain health. Here divided by self-reported rating of mental health. Categories with less than 20% of the responses do not have percentages shown. In the womb (before birth); Childhood (0-12 years); Adolescence (13-18 years); Young adulthood (19...45 years); Middle age (45-65 years); Old age (over 65 years)

## 2.9 Illness

Ratings of life periods to take care of one's brain  
by experience of long-standing illness, disability, or health problem

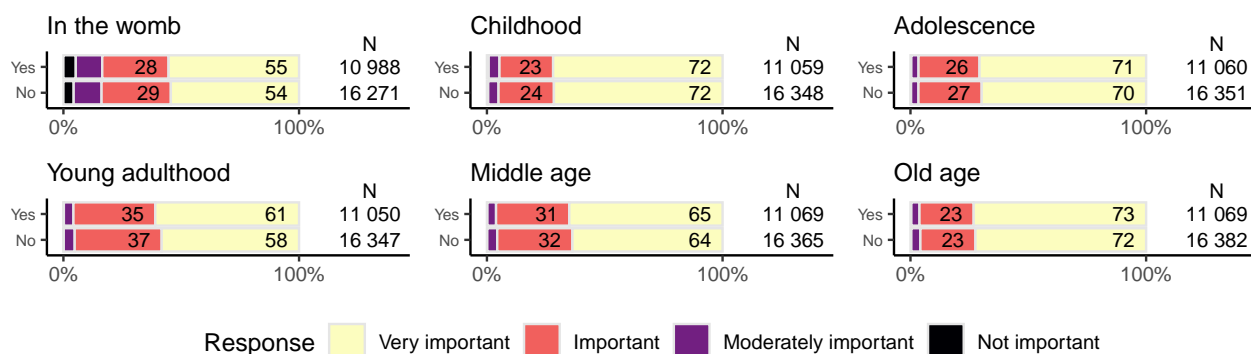

Question 2 asked respondents to rate on a 5-level likert-scale at which life stages it is important to look after one's brain health. Here divided by whether they had experience with long-standing illness, disability, or health problem. Categories with less than 20% of the responses do not have percentages shown. In the womb (before birth); Childhood (0-12 years); Adolescence (13-18 years); Young adulthood (19...45 years); Middle age (45-65 years); Old age (over 65 years)

## 2.10 Brain disease care

### Ratings of life periods to take care of one's brain

by experience of taking care of family member with brain disease

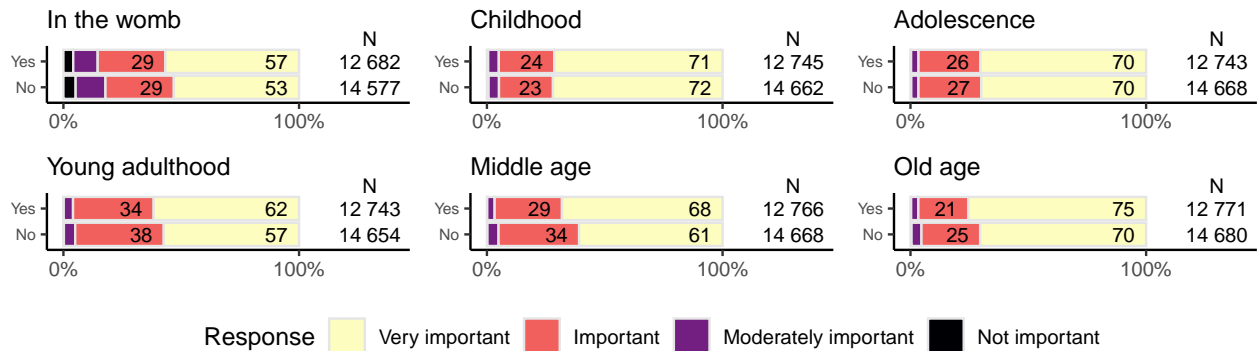

Question 2 asked respondents to rate on a 5-level likert-scale at which life stages it is important to look after one's brain health. Here divided by whether they had experience with looking after a member of family with brain disease. Categories with less than 20% of the responses do not have percentages shown. In the womb (before birth); Childhood (0-12 years); Adolescence (13-18 years); Young adulthood (19...45 years); Middle age (45-65 years); Old age (over 65 years).

## 2.11 Research participation

### Ratings of life periods to take care of one's brain

By experience of brain research participation

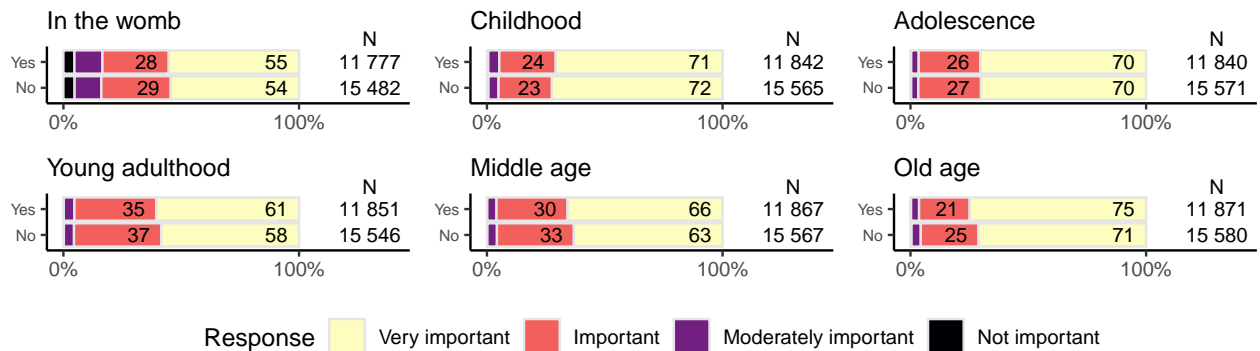

Question 2 asked respondents to rate on a 5-level likert-scale at which life stages it is important to look after one's brain health. Here divided by whether they have participated in brain research projects. Categories with less than 20% of the responses do not have percentages shown. In the womb (before birth); Childhood (0-12 years); Adolescence (13-18 years); Young adulthood (19...45 years); Middle age (45-65 years); Old age (over 65 years).



### 3 Question 3

#### 3.1 Overall

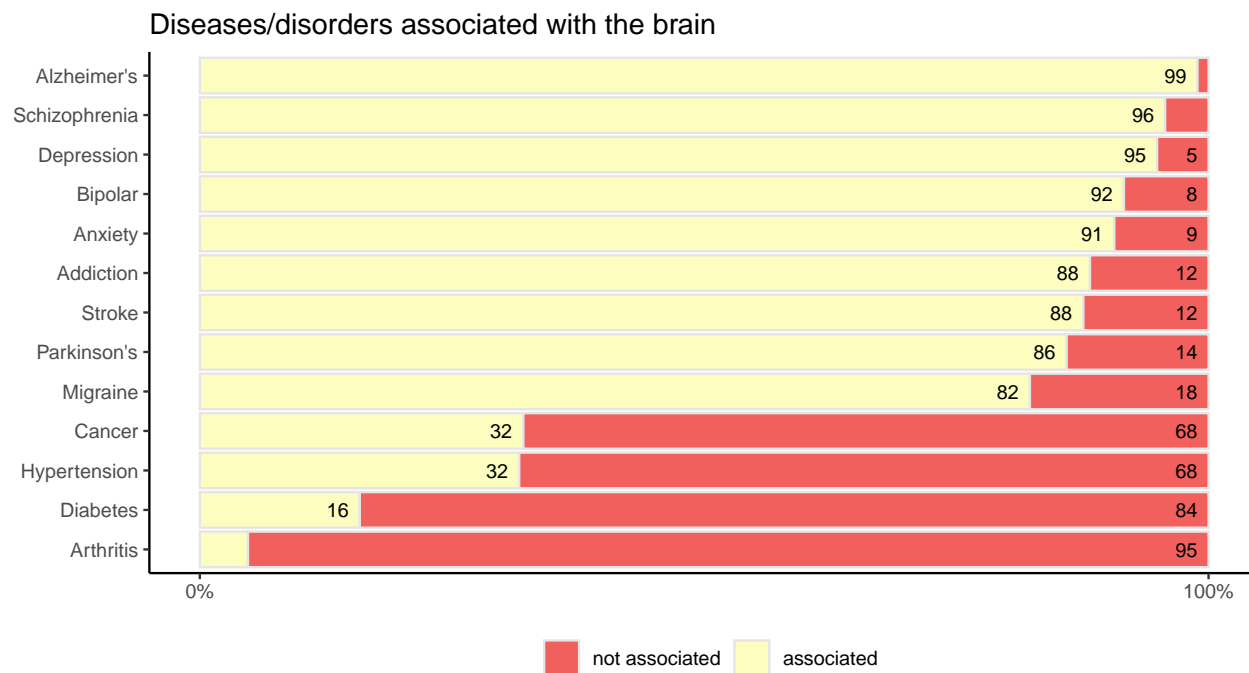

Respondents were given the option to tick boxes with the diseases presented above to indicate which ones they associated with the brain. They were allowed to select as many categories as they wished. Percentages are added to clarify how large a porportion of the 27 590 participants associated the diseases with the brain.

### 3.2 Gender

Diseases/disorders associated with the brain  
by gender

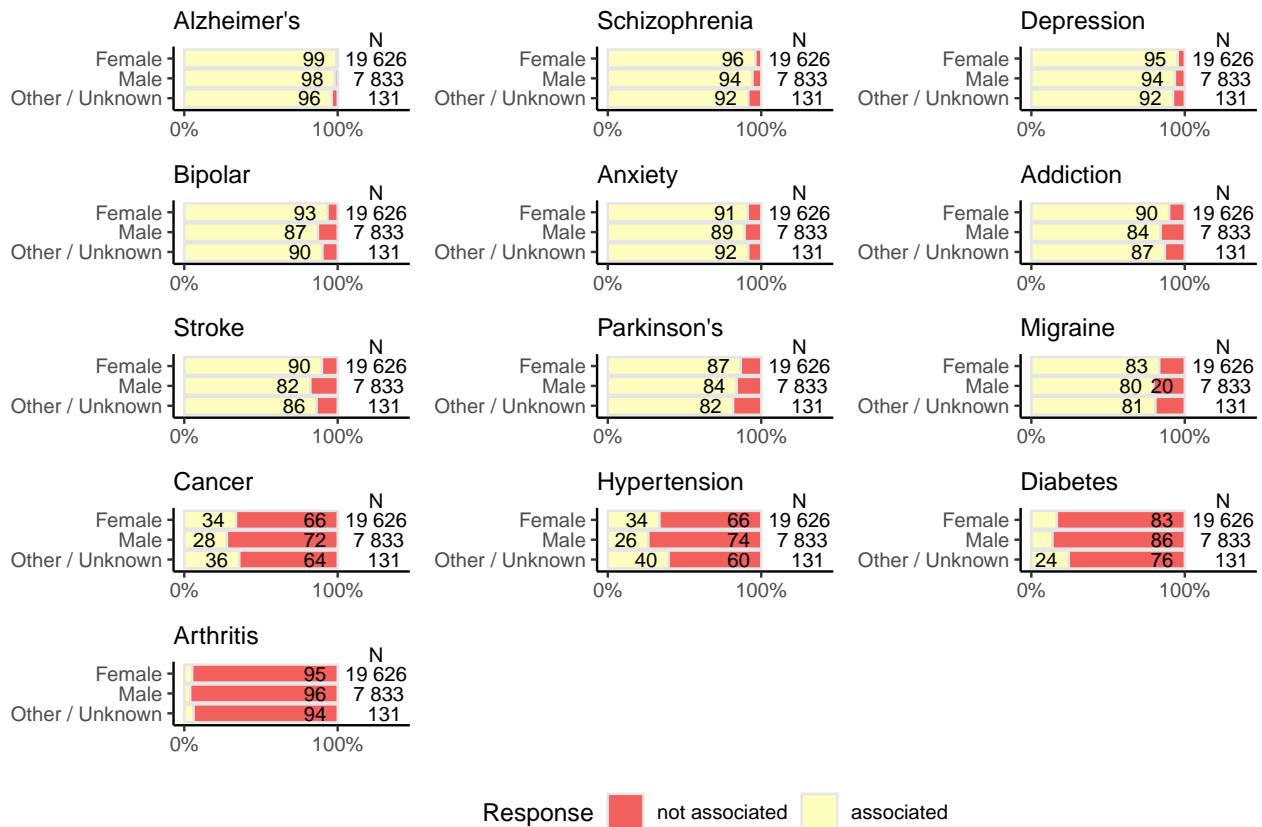

Respondents were given the option to tick boxes with the diseases presented above to indicate which ones they associated with the brain. They were allowed to select as many categories as they wished. Percentages are added to clarify how large a porportion of the 27 590 participants associated the diseases with the brain.

Only

### 3.3 Age groups

#### Diseases/disorders associated with the brain by age groups

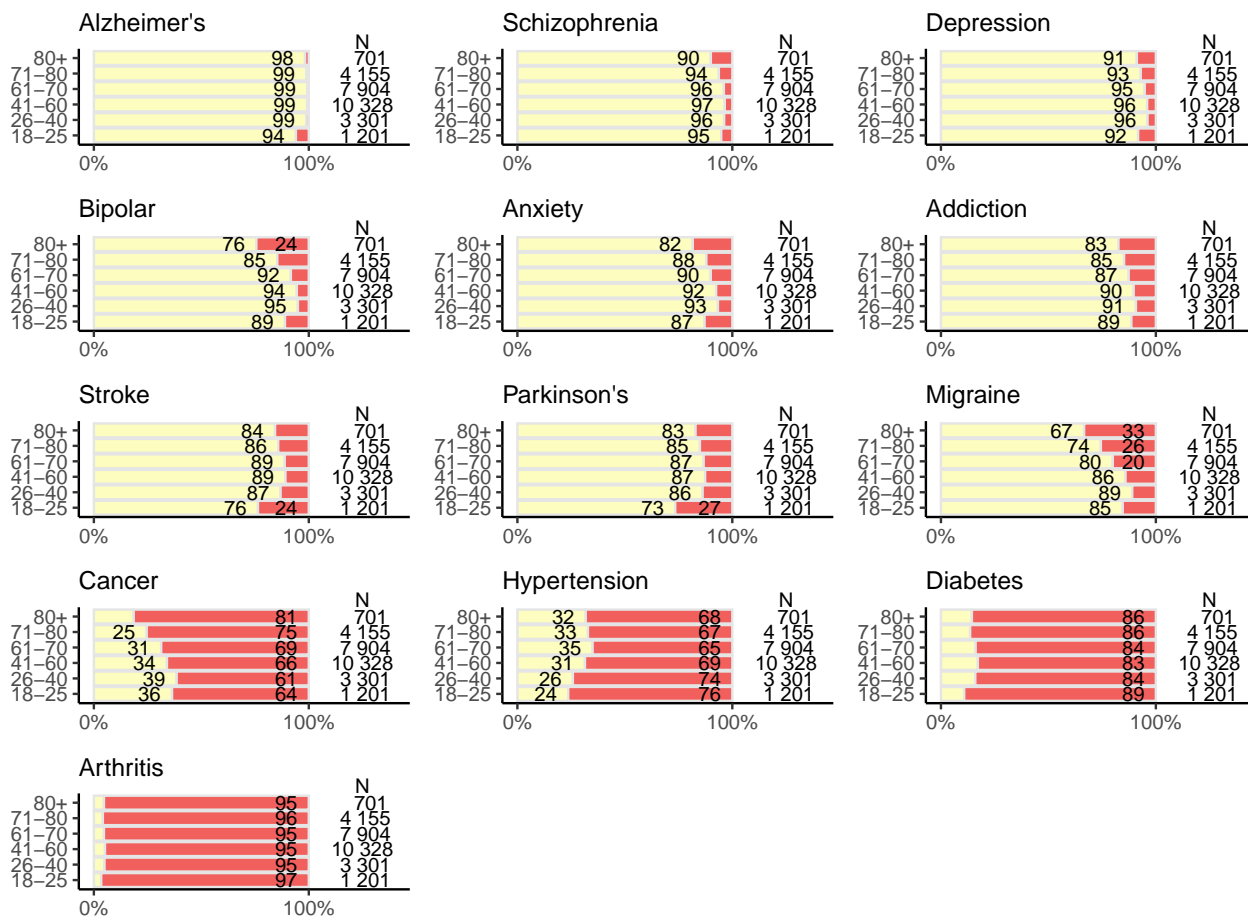

Response ■ not associated ■ associated

Respondents were given the option to tick boxes with the diseases presented above to indicate which ones they associated with the brain. They were allowed to select as many categories as they wished. Percentages are added to clarify how large a porportion of the 27 590 participants associated the diseases with the brain.

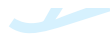

### 3.4 Education

#### Diseases/disorders associated with the brain by education level

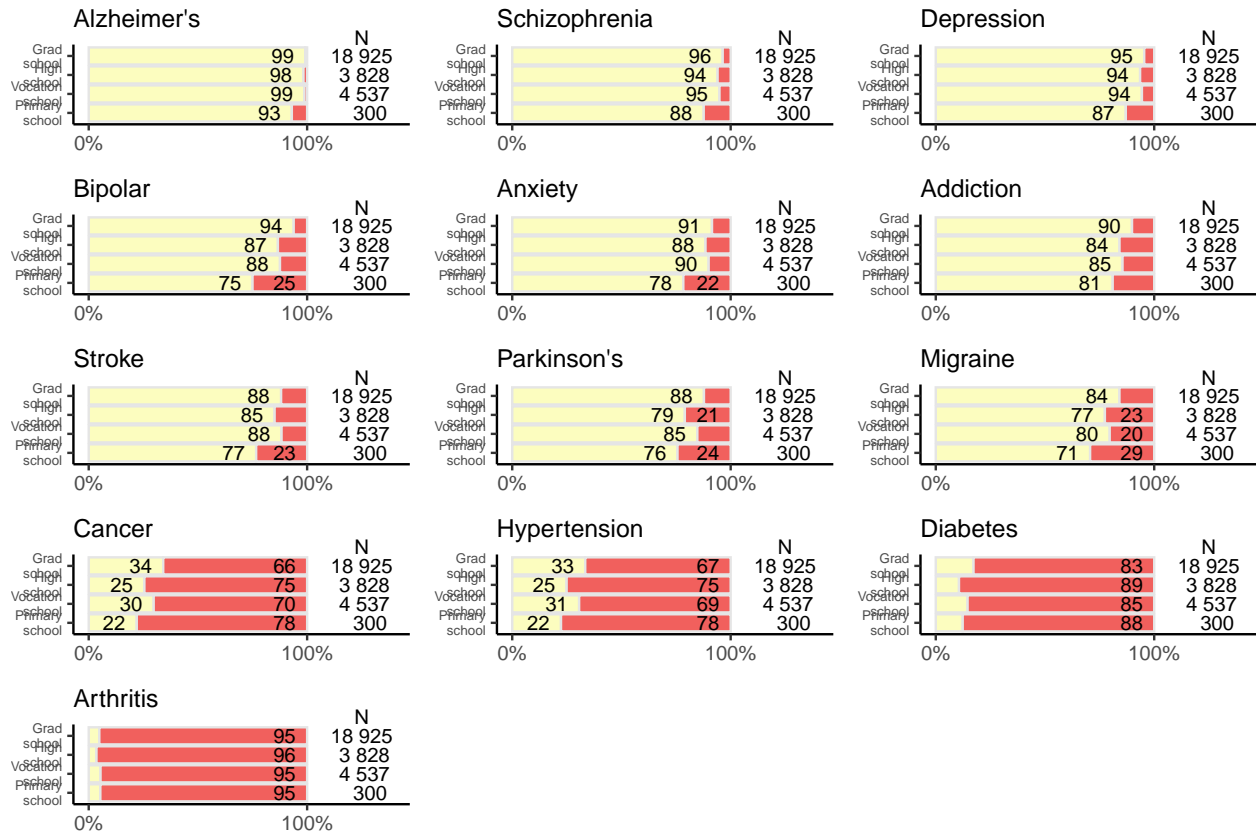

Response ■ not associated ■ associated

Respondents were given the option to tick boxes with the diseases presented above to indicate which ones they associated with the brain. They were allowed to select as many categories as they wished. Percentages are added to clarify how large a proportion of the 27 590 respondents associated the diseases with the brain.

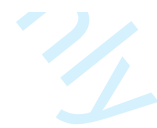

### 3.5 Country

#### Diseases/disorders associated with the brain by country of residence

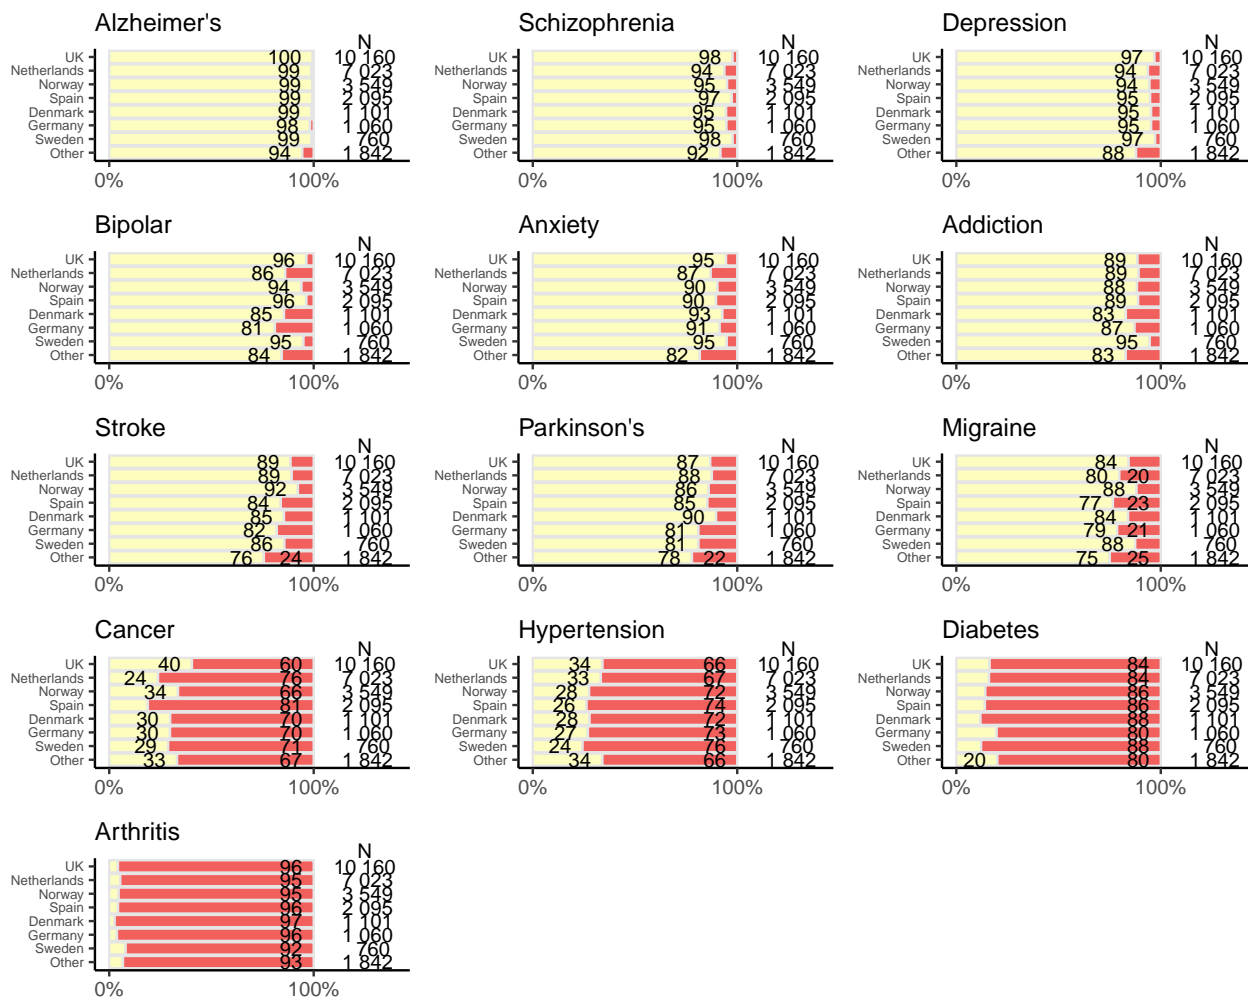

Response ■ not associated ■ associated

Respondents were given the option to tick boxes with the diseases presented above to indicate which ones they associated with the brain. They were allowed to select as many categories as they wished. Percentages are added to clarify how large a porportion of the 27 590 participants associated the diseases with the brain.

### 3.6 Health care experience/education

#### Diseases/disorders associated with the brain

by reported education or work experience in health care...

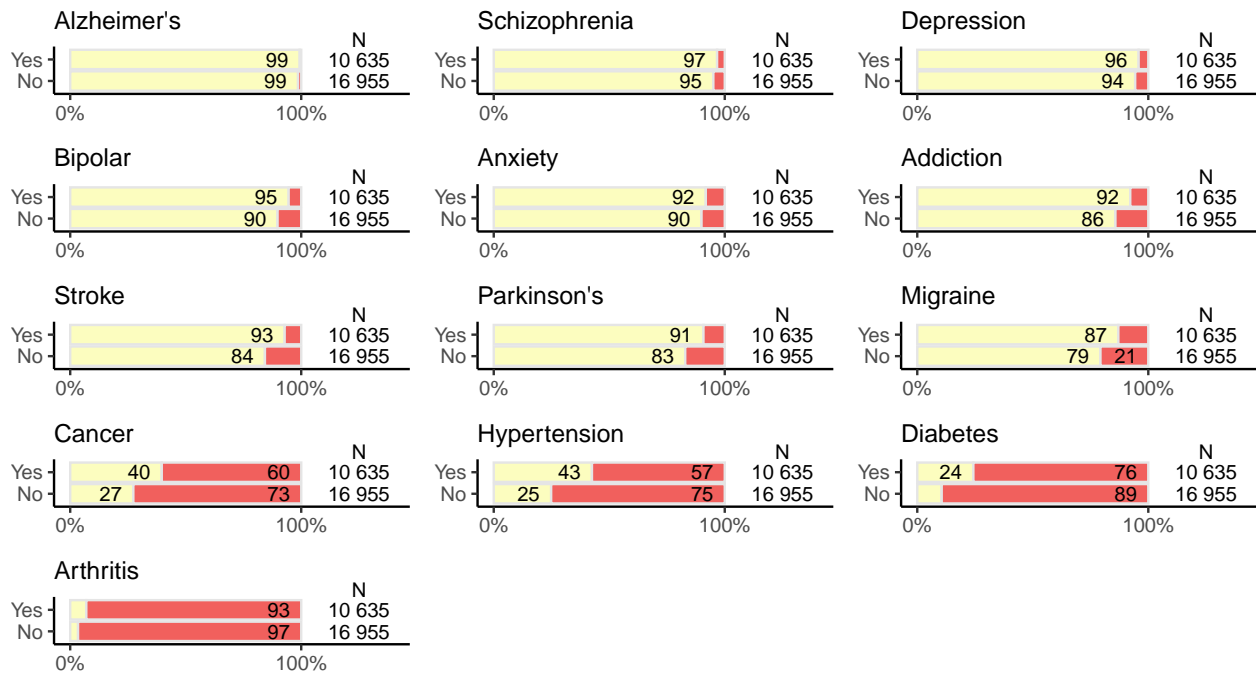

Response ■ not associated ■ associated

Respondents were given the option to tick boxes with the diseases presented above to indicate which ones they associated with the brain. They were allowed to select as many categories as they wished. Percentages are added to clarify how large a porportion of the 27 590 participants associated the diseases with the brain.

www.bmj.com

### 3.7 Cognitive health

#### Diseases/disorders associated with the brain by self-rated cognitive health

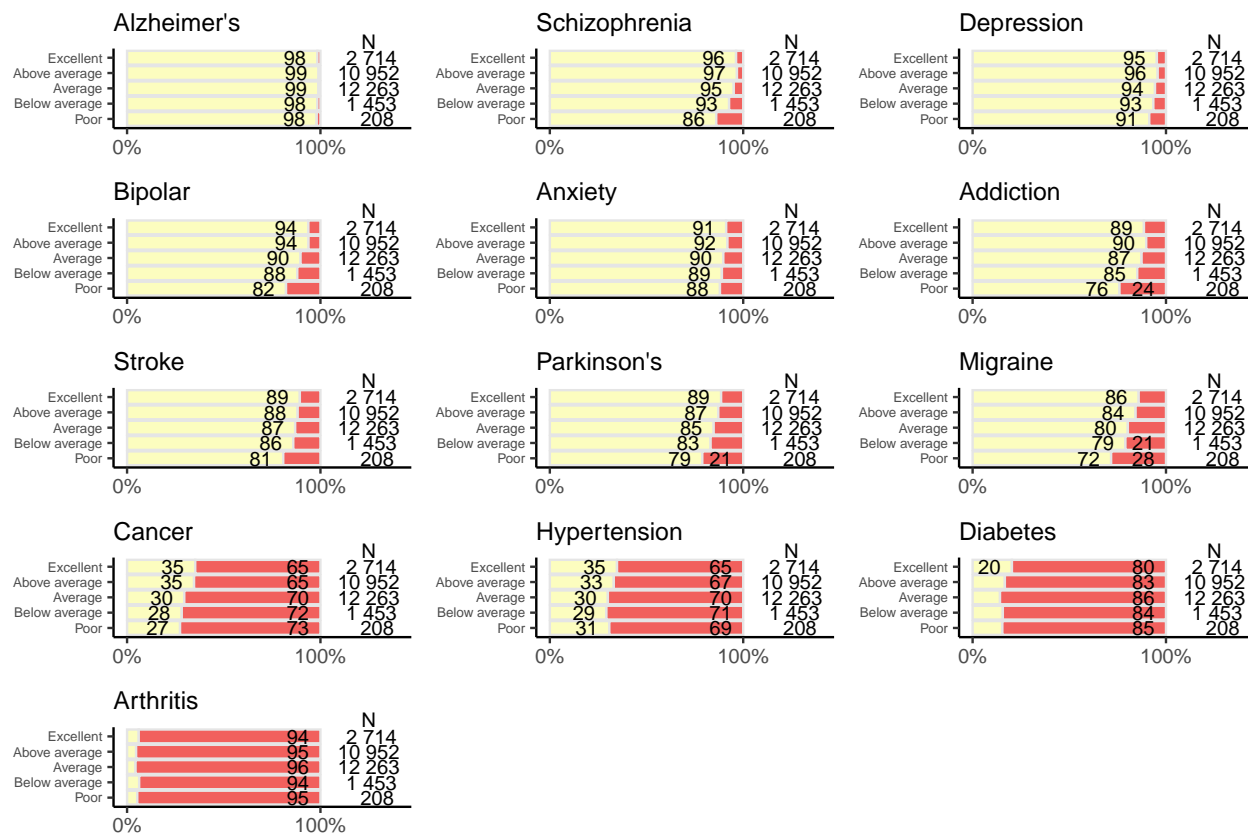

Response ■ not associated ■ associated

Respondents were given the option to tick boxes with the diseases presented above to indicate which ones they associated with the brain. They were allowed to select as many categories as they wished. Percentages are added to clarify how large a proportion of the 27 590 participants associated the diseases with the brain.

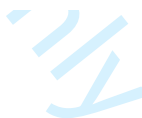

### 3.8 Mental health

#### Diseases/disorders associated with the brain by self-rated mental health

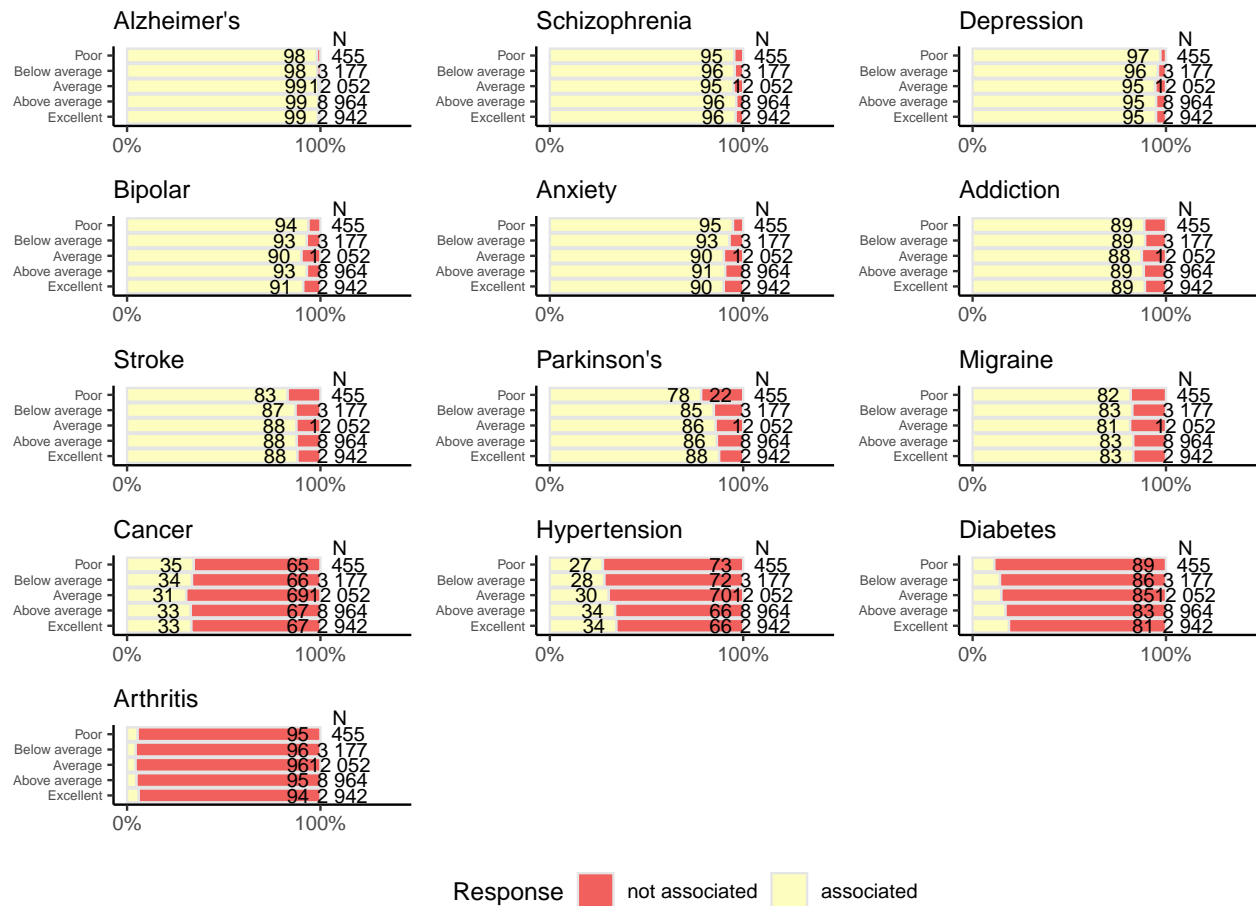

Respondents were given the option to tick boxes with the diseases presented above to indicate which ones they associated with the brain. They were allowed to select as many categories as they wished. Percentages are added to clarify how large a porportion of the 27 590 participants associated the diseases with the brain.

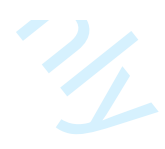



### 3.9 Illness

#### Diseases/disorders associated with the brain

by experience of long-standing illness, disability or health problem

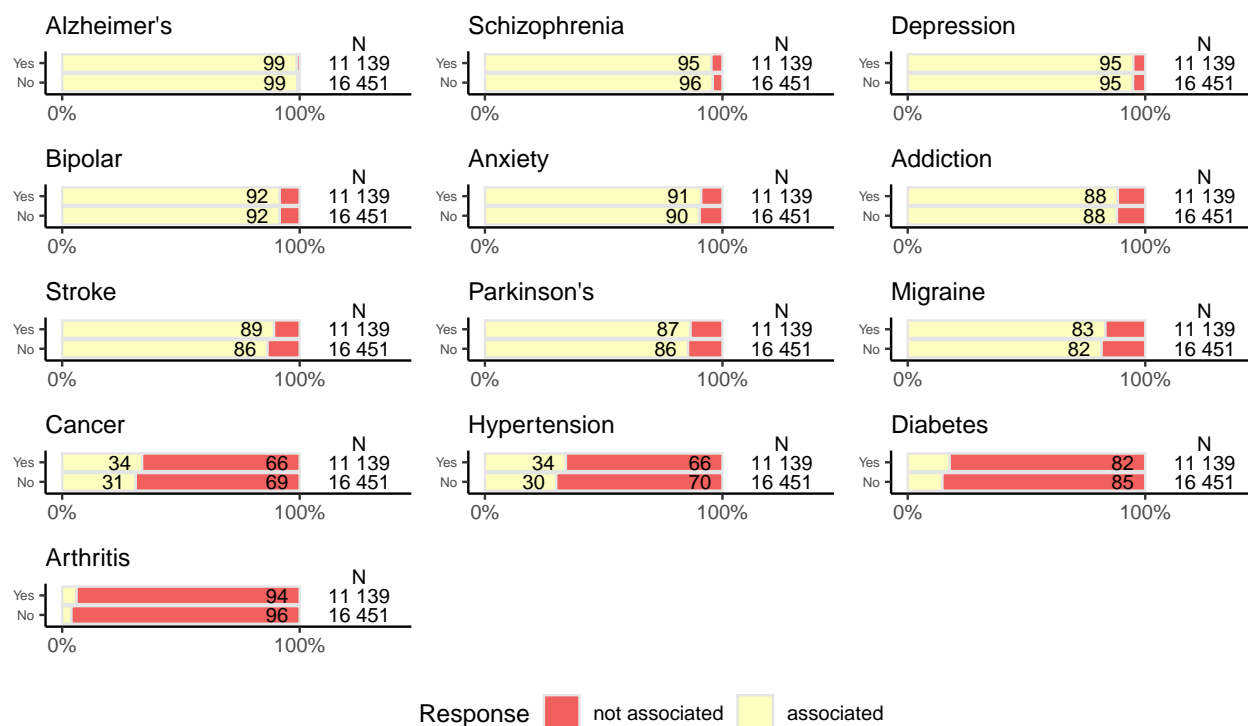

Respondents were given the option to tick boxes with the diseases presented above to indicate which ones they associated with the brain. They were allowed to select as many categories as they wished. Here divided by whether they had experience with long-standing illness, disability, or health problem. Percentages are added to clarify how large a proportion of the 27 590 participants associated the diseases with the brain.

### 3.10 Brain disease care

#### Ratings of life periods to take care of one's brain

by experience of taking care of family member with brain disease

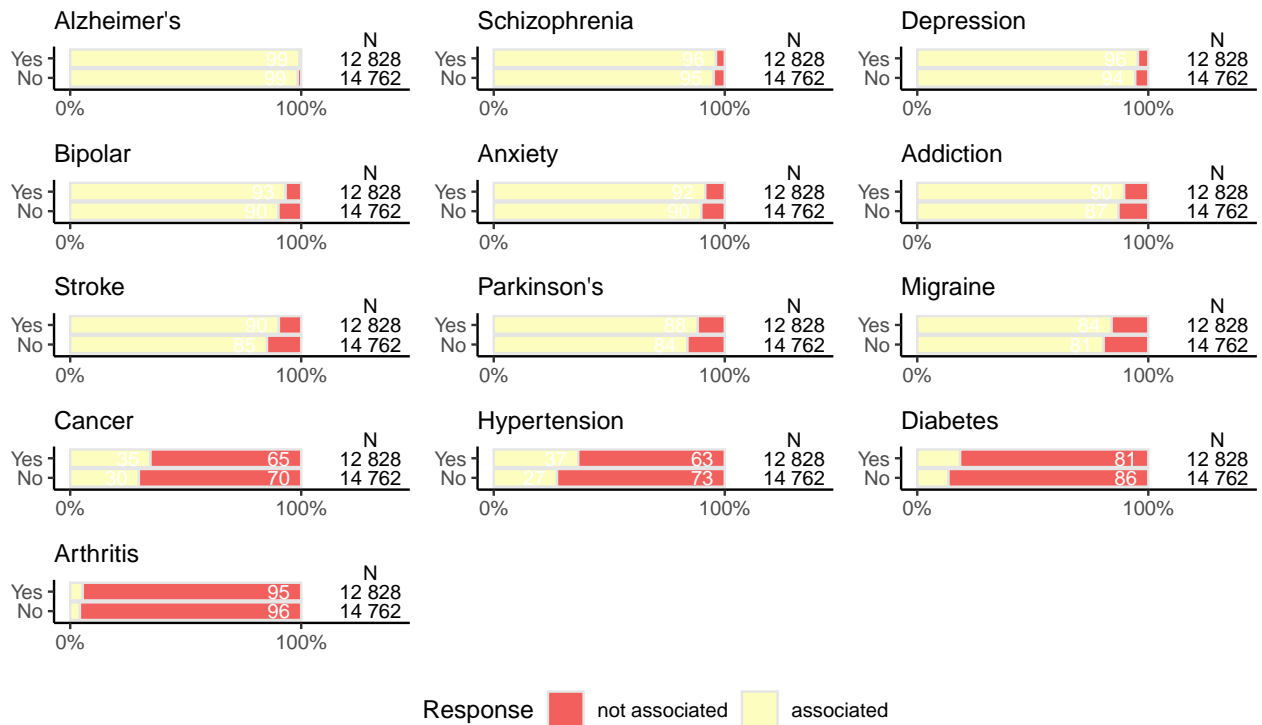

Respondents were given the option to tick boxes with the diseases presented above to indicate which ones they associated with the brain. They were allowed to select as many categories as they wished. Here divided by whether they had experience with looking after a member of family with brain disease. Percentages are added to clarify how large a porportion of the {thousand(row(data))} participants associated the diseases with the brain.

### 3.11 Research participation

#### Ratings of life periods to take care of one's brain

By experience of brain research participation

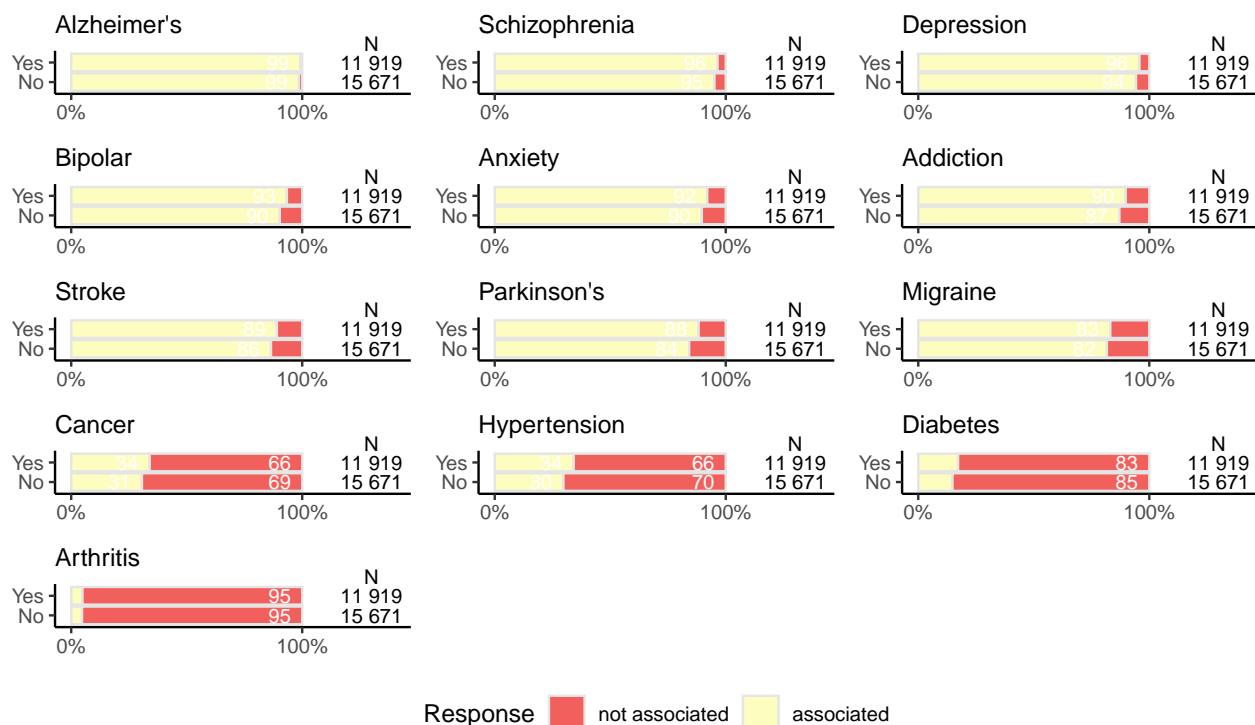

Respondents were given the option to tick boxes with the diseases presented above to indicate which ones they associated with the brain. They were allowed to select as many categories as they wished. Here divided by whether they have participated in brain research projects. Percentages are added to clarify how large a porportion of the (thousand(nrow(data))) participants associated the diseases with the brain.

## QUESTION 1\_CONTINUOUS

| key        | fct                          | term              | estimate     | std.error   | statistic    | p.value     |
|------------|------------------------------|-------------------|--------------|-------------|--------------|-------------|
| Income     | age                          | (Intercept)       | 3,211652325  | 0,008052238 | 398,85215    | 0           |
| Income     | age                          | 41-60             | -0,016065662 | 0,012028221 | -1,33566401  | 0,181670199 |
| Income     | age                          | <= 40             | -0,129769237 | 0,015750707 | -8,238946632 | 1,81394E-16 |
| Income     | brain_disease_caregiver      | (Intercept)       | 3,176951369  | 0,007488456 | 424,246488   | 0           |
| Income     | brain_disease_caregiver      | Yes               | 0,016086109  | 0,010983215 | 1,464608386  | 0,143039252 |
| Income     | brain_research_participation | (Intercept)       | 3,174295436  | 0,007269833 | 436,6394132  | 0           |
| Income     | brain_research_participation | Yes               | 0,023444677  | 0,011057597 | 2,120232508  | 0,033995392 |
| Income     | cognitive_health             | (Intercept)       | 3,188079265  | 0,005649975 | 564,2643045  | 0           |
| Income     | cognitive_health             | Below average     | -0,060729356 | 0,023046055 | -2,635130157 | 0,00841523  |
| Income     | education                    | (Intercept)       | 3,17388765   | 0,006610989 | 480,0927121  | 0           |
| Income     | education                    | Lower             | 0,033622231  | 0,011806662 | 2,847733991  | 0,004406442 |
| Income     | gender                       | (Intercept)       | 3,201311005  | 0,006490468 | 493,232721   | 0           |
| Income     | gender                       | Man               | -0,061115683 | 0,012158592 | -5,026542912 | 5,02541E-07 |
| Income     | gender                       | Other/Undisclosed | 0,097901593  | 0,080742019 | 1,212523477  | 0,225322503 |
| Income     | healthcare_experience        | (Intercept)       | 3,129813112  | 0,006969164 | 449,0944939  | 0           |
| Income     | healthcare_experience        | Yes               | 0,14161681   | 0,011222193 | 12,61935307  | 2,0853E-36  |
| Income     | illness_experience           | (Intercept)       | 3,162137405  | 0,007087893 | 446,1322363  | 0           |
| Income     | illness_experience           | Yes               | 0,055293207  | 0,011162985 | 4,953263712  | 7,34125E-07 |
| Income     | mental_health                | (Intercept)       | 3,188145412  | 0,005878801 | 542,3121599  | 0           |
| Income     | mental_health                | Below average     | -0,02821182  | 0,016197765 | -1,741710643 | 0,081570297 |
| Income     | relationship                 | (Intercept)       | 3,18385576   | 0,008252219 | 385,8181589  | 0           |
| Income     | relationship                 | Stable            | 0,001025308  | 0,011034373 | 0,092919484  | 0,925968205 |
| Profession | age                          | (Intercept)       | 3,511242604  | 0,007771558 | 451,8067824  | 0           |
| Profession | age                          | 41-60             | 0,087301086  | 0,011606927 | 7,521464433  | 5,58225E-14 |
| Profession | age                          | <= 40             | 0,188355969  | 0,015202719 | 12,38962357  | 3,69347E-35 |
| Profession | brain_disease_caregiver      | (Intercept)       | 3,60584389   | 0,007237266 | 498,2328824  | 0           |
| Profession | brain_disease_caregiver      | Yes               | -0,066828472 | 0,010609684 | -6,298818396 | 3,04466E-10 |
| Profession | brain_research_participation | (Intercept)       | 3,604682489  | 0,007023046 | 513,2648627  | 0           |
| Profession | brain_research_participation | Yes               | -0,069254062 | 0,010682202 | -6,483126172 | 9,13658E-11 |
| Profession | cognitive_health             | (Intercept)       | 3,582874855  | 0,005458772 | 656,3517642  | 0           |
| Profession | cognitive_health             | Below average     | -0,135330889 | 0,022275477 | -6,07533067  | 1,25359E-09 |
| Profession | education                    | (Intercept)       | 3,622222222  | 0,006370451 | 568,5974285  | 0           |
| Profession | education                    | Lower             | -0,151510925 | 0,011380527 | -13,31317353 | 2,58833E-40 |
| Profession | gender                       | (Intercept)       | 3,560536281  | 0,006275653 | 567,3571108  | 0           |
| Profession | gender                       | Man               | 0,050246774  | 0,011755088 | 4,27447023   | 1,92238E-05 |
| Profession | gender                       | Other/Undisclosed | -0,009355178 | 0,078099489 | -0,119785399 | 0,904654025 |
| Profession | healthcare_experience        | (Intercept)       | 3,532708618  | 0,006745975 | 523,6765089  | 0           |
| Profession | healthcare_experience        | Yes               | 0,108921879  | 0,010858632 | 10,03090224  | 1,22455E-23 |
| Profession | illness_experience           | (Intercept)       | 3,585729109  | 0,006855414 | 523,0507177  | 0           |
| Profession | illness_experience           | Yes               | -0,027224234 | 0,010794053 | -2,522151151 | 0,011669564 |
| Profession | mental_health                | (Intercept)       | 3,581079381  | 0,005681842 | 630,2673027  | 0           |
| Profession | mental_health                | Below average     | -0,048133645 | 0,015665983 | -3,072494319 | 0,002124857 |
| Profession | relationship                 | (Intercept)       | 3,588915503  | 0,007974763 | 450,0341319  | 0           |
| Profession | relationship                 | Stable            | -0,025340725 | 0,010665413 | -2,375972316 | 0,017509596 |
| Education  | age                          | (Intercept)       | 3,673709105  | 0,007912557 | 464,2884819  | 0           |
| Education  | age                          | 41-60             | -0,018335841 | 0,011819766 | -1,551286311 | 0,120844606 |
| Education  | age                          | <= 40             | 0,106544962  | 0,015479227 | 6,883093343  | 5,9825E-12  |
| Education  | brain_disease_caregiver      | (Intercept)       | 3,704177439  | 0,007357169 | 503,478607   | 0           |
| Education  | brain_disease_caregiver      | Yes               | -0,042885854 | 0,010789054 | -3,974941245 | 7,05766E-05 |
| Education  | brain_research_participation | (Intercept)       | 3,689281825  | 0,007141148 | 516,6230431  | 0           |
| Education  | brain_research_participation | Yes               | -0,011685736 | 0,010866897 | -1,07535169  | 0,282226746 |
| Education  | cognitive_health             | (Intercept)       | 3,697142193  | 0,005542939 | 667,0003081  | 0           |
| Education  | cognitive_health             | Below average     | -0,215031823 | 0,0226247   | -9,504294893 | 2,17253E-21 |
| Education  | education                    | (Intercept)       | 3,757858468  | 0,006447201 | 582,8666498  | 0           |
| Education  | education                    | Lower             | -0,23497278  | 0,011517895 | -20,40066993 | 7,91292E-92 |
| Education  | gender                       | (Intercept)       | 3,675294118  | 0,006380363 | 576,0321164  | 0           |
| Education  | gender                       | Man               | 0,031093774  | 0,011949683 | 2,602058407  | 0,00927158  |
| Education  | gender                       | Other/Undisclosed | 0,025493284  | 0,079418738 | 0,320998349  | 0,748214084 |
| Education  | healthcare_experience        | (Intercept)       | 3,626259632  | 0,006846102 | 529,6824163  | 0           |
| Education  | healthcare_experience        | Yes               | 0,150218723  | 0,01102001  | 13,63145026  | 3,57172E-42 |
| Education  | illness_experience           | (Intercept)       | 3,705448112  | 0,00696595  | 531,9372007  | 0           |
| Education  | illness_experience           | Yes               | -0,052587617 | 0,010967922 | -4,794674738 | 1,63791E-06 |
| Education  | mental_health                | (Intercept)       | 3,704195834  | 0,005766848 | 642,3258578  | 0           |
| Education  | mental_health                | Below average     | -0,151651586 | 0,015895616 | -9,540466046 | 1,53554E-21 |
| Education  | relationship                 | (Intercept)       | 3,68507512   | 0,008106265 | 454,5959286  | 0           |
| Education  | relationship                 | Stable            | -0,00150197  | 0,010841575 | -0,138538027 | 0,889816234 |
| Diet       | age                          | (Intercept)       | 3,785584014  | 0,007285655 | 519,5941794  | 0           |
| Diet       | age                          | 41-60             | 0,193870709  | 0,01087479  | 17,82753539  | 1,08594E-70 |

|    |                      |                              |                   |              |             |              |             |
|----|----------------------|------------------------------|-------------------|--------------|-------------|--------------|-------------|
| 1  |                      |                              |                   |              |             |              |             |
| 2  |                      |                              |                   |              |             |              |             |
| 3  |                      |                              |                   |              |             |              |             |
| 4  | Diet                 | age                          | <= 40             | 0,235834995  | 0,014227934 | 16,57549163  | 2,08977E-61 |
| 5  | Diet                 | brain_disease_caregiver      | (Intercept)       | 3,862816131  | 0,006811822 | 567,0753267  | 0           |
| 6  | Diet                 | brain_disease_caregiver      | Yes               | 0,073412566  | 0,009985729 | 7,351748354  | 2,01113E-13 |
| 7  | Diet                 | brain_research_participation | (Intercept)       | 3,888202753  | 0,006614123 | 587,8636503  | 0           |
| 8  | Diet                 | brain_research_participation | Yes               | 0,020318868  | 0,010064693 | 2,018826426  | 0,043514998 |
| 9  | Diet                 | cognitive_health             | (Intercept)       | 3,907903433  | 0,005135167 | 761,00807    | 0           |
| 10 | Diet                 | cognitive_health             | Below average     | -0,182293677 | 0,020975605 | -8,690747091 | 3,79813E-18 |
| 11 | Diet                 | education                    | (Intercept)       | 3,933964774  | 0,006002829 | 655,3517582  | 0           |
| 12 | Diet                 | education                    | Lower             | -0,118095463 | 0,010726238 | -11,00996072 | 3,92025E-28 |
| 13 | Diet                 | gender                       | (Intercept)       | 3,936366905  | 0,005893193 | 667,9514598  | 0           |
| 14 | Diet                 | gender                       | Man               | -0,13958648  | 0,011037014 | -12,64712332 | 1,46901E-36 |
| 15 | Diet                 | gender                       | Other/Undisclosed | 0,047885064  | 0,07320735  | 0,654101864  | 0,513051679 |
| 16 | Diet                 | healthcare_experience        | (Intercept)       | 3,841513475  | 0,006338305 | 606,0790149  | 0           |
| 17 | Diet                 | healthcare_experience        | Yes               | 0,14380015   | 0,010205785 | 14,09006238  | 6,27873E-45 |
| 18 | Diet                 | illness_experience           | (Intercept)       | 3,91566634   | 0,006451823 | 606,908558   | 0           |
| 19 | Diet                 | illness_experience           | Yes               | -0,046341465 | 0,010159635 | -4,561331675 | 5,10506E-06 |
| 20 | Diet                 | mental_health                | (Intercept)       | 3,908597171  | 0,005347862 | 730,8710397  | 0           |
| 21 | Diet                 | mental_health                | Below average     | -0,088048846 | 0,014721371 | -5,981021982 | 2,24493E-09 |
| 22 | Diet                 | relationship                 | (Intercept)       | 3,911913238  | 0,007503125 | 521,3711858  | 0           |
| 23 | Diet                 | relationship                 | Stable            | -0,0267392   | 0,010039348 | -2,663439736 | 0,007739155 |
| 24 | Physical environment | age                          | (Intercept)       | 3,884244627  | 0,007287778 | 532,9806491  | 0           |
| 25 | Physical environment | age                          | 41-60             | 0,094290726  | 0,010881058 | 8,665584249  | 4,73492E-18 |
| 26 | Physical environment | age                          | <= 40             | 0,059058944  | 0,01425315  | 4,143571412  | 3,42963E-05 |
| 27 | Physical environment | brain_disease_caregiver      | (Intercept)       | 3,921325334  | 0,006778485 | 578,495872   | 0           |
| 28 | Physical environment | brain_disease_caregiver      | Yes               | 0,017095224  | 0,00993729  | 1,720310502  | 0,085387294 |
| 29 | Physical environment | brain_research_participation | (Intercept)       | 3,925778491  | 0,00657843  | 596,7652393  | 0           |
| 30 | Physical environment | brain_research_participation | Yes               | 0,00810023   | 0,010006071 | 0,809531524  | 0,4182165   |
| 31 | Physical environment | cognitive_health             | (Intercept)       | 3,935403823  | 0,005109959 | 770,1439377  | 0           |
| 32 | Physical environment | cognitive_health             | Below average     | -0,102375182 | 0,020892569 | -4,900076262 | 9,63453E-07 |
| 33 | Physical environment | education                    | (Intercept)       | 3,924036522  | 0,005981425 | 656,0370452  | 0           |
| 34 | Physical environment | education                    | Lower             | 0,01673611   | 0,010686506 | 1,566097467  | 0,117337337 |
| 35 | Physical environment | gender                       | (Intercept)       | 3,950619814  | 0,00587052  | 672,9590556  | 0           |
| 36 | Physical environment | gender                       | Man               | -0,0769045   | 0,010995228 | -6,994352694 | 2,72597E-12 |
| 37 | Physical environment | gender                       | Other/Undisclosed | 0,104935742  | 0,073307853 | 1,43143931   | 0,152315742 |
| 38 | Physical environment | healthcare_experience        | (Intercept)       | 3,897175745  | 0,006316264 | 617,0064721  | 0           |
| 39 | Physical environment | healthcare_experience        | Yes               | 0,083255339  | 0,010171552 | 8,185116519  | 2,83725E-16 |
| 40 | Physical environment | illness_experience           | (Intercept)       | 3,907364436  | 0,006412218 | 609,3624119  | 0           |
| 41 | Physical environment | illness_experience           | Yes               | 0,054375796  | 0,010100386 | 5,383536317  | 7,36357E-08 |
| 42 | Physical environment | mental_health                | (Intercept)       | 3,933680322  | 0,005318546 | 739,6156934  | 0           |
| 43 | Physical environment | mental_health                | Below average     | -0,033458593 | 0,014665214 | -2,281493601 | 0,022526882 |
| 44 | Physical environment | relationship                 | (Intercept)       | 3,949565936  | 0,007463353 | 529,1945991  | 0           |
| 45 | Physical environment | relationship                 | Stable            | -0,03628433  | 0,009981424 | -3,635185795 | 0,000278288 |
| 46 | Life goals           | age                          | (Intercept)       | 3,942310719  | 0,007611215 | 517,9607948  | 0           |
| 47 | Life goals           | age                          | 41-60             | 0,00556348   | 0,011374508 | 0,489118281  | 0,624761862 |
| 48 | Life goals           | age                          | <= 40             | -0,089369543 | 0,014897589 | -5,998926449 | 2,01107E-09 |
| 49 | Life goals           | brain_disease_caregiver      | (Intercept)       | 3,937652978  | 0,007079368 | 556,215321   | 0           |
| 50 | Life goals           | brain_disease_caregiver      | Yes               | -0,016867867 | 0,010380731 | -1,624920914 | 0,104190874 |
| 51 | Life goals           | brain_research_participation | (Intercept)       | 3,957529947  | 0,006867193 | 576,2951697  | 0           |
| 52 | Life goals           | brain_research_participation | Yes               | -0,064134911 | 0,010445143 | -6,140165823 | 8,35634E-10 |
| 53 | Life goals           | cognitive_health             | (Intercept)       | 3,933451985  | 0,005339913 | 736,6134589  | 0           |
| 54 | Life goals           | cognitive_health             | Below average     | -0,060724712 | 0,021798519 | -2,785726488 | 0,005344448 |
| 55 | Life goals           | education                    | (Intercept)       | 3,941192053  | 0,006248346 | 630,7576465  | 0           |
| 56 | Life goals           | education                    | Lower             | -0,036308629 | 0,01115889  | -3,253784878 | 0,001140159 |
| 57 | Life goals           | gender                       | (Intercept)       | 3,949902873  | 0,00613473  | 643,8592441  | 0           |
| 58 | Life goals           | gender                       | Man               | -0,070563818 | 0,011486371 | -6,143264526 | 8,19509E-10 |
| 59 | Life goals           | gender                       | Other/Undisclosed | -0,012894999 | 0,076384537 | -0,168816876 | 0,865941926 |
| 60 | Life goals           | healthcare_experience        | (Intercept)       | 3,885658456  | 0,00659306  | 589,3558758  | 0           |
|    | Life goals           | healthcare_experience        | Yes               | 0,114435813  | 0,010614634 | 10,78094792  | 4,79692E-27 |
|    | Life goals           | illness_experience           | (Intercept)       | 3,92583557   | 0,006705271 | 585,484998   | 0           |
|    | Life goals           | illness_experience           | Yes               | 0,009840106  | 0,010553332 | 0,93241698   | 0,351129261 |
|    | Life goals           | mental_health                | (Intercept)       | 3,938651591  | 0,005554216 | 709,1282272  | 0           |
|    | Life goals           | mental_health                | Below average     | -0,067246724 | 0,015315929 | -4,390639613 | 1,13439E-05 |
|    | Life goals           | relationship                 | (Intercept)       | 3,935236367  | 0,00779859  | 504,6087033  | 0           |
|    | Life goals           | relationship                 | Stable            | -0,009707911 | 0,010429015 | -0,930856034 | 0,351936213 |
|    | Social environment   | age                          | (Intercept)       | 4,057665039  | 0,006731831 | 602,7580406  | 0           |
|    | Social environment   | age                          | 41-60             | 0,127275773  | 0,01005662  | 12,65591975  | 1,31284E-36 |
|    | Social environment   | age                          | <= 40             | 0,264304658  | 0,013171754 | 20,06601829  | 6,34653E-89 |
|    | Social environment   | brain_disease_caregiver      | (Intercept)       | 4,143556613  | 0,006304273 | 657,2616215  | 0           |
|    | Social environment   | brain_disease_caregiver      | Yes               | 0,010710773  | 0,009244644 | 1,158592291  | 0,246632479 |
|    | Social environment   | brain_research_participation | (Intercept)       | 4,165812404  | 0,006117286 | 680,9903226  | 0           |

|    |                    |                              |                   |              |             |               |             |
|----|--------------------|------------------------------|-------------------|--------------|-------------|---------------|-------------|
| 1  |                    |                              |                   |              |             |               |             |
| 2  |                    |                              |                   |              |             |               |             |
| 3  |                    |                              |                   |              |             |               |             |
| 4  | Social environment | brain_research_participation | Yes               | -0,039970653 | 0,009305123 | -4,295553424  | 1,74856E-05 |
| 5  | Social environment | cognitive_health             | (Intercept)       | 4,156299594  | 0,004752518 | 874,5469248   | 0           |
| 6  | Social environment | cognitive_health             | Below average     | -0,129076363 | 0,019380228 | -6,660208851  | 2,78594E-11 |
| 7  | Social environment | education                    | (Intercept)       | 4,167832538  | 0,005561463 | 749,4129439   | 0           |
| 8  | Social environment | education                    | Lower             | -0,061543376 | 0,009932473 | -6,196178499  | 5,86711E-10 |
| 9  | Social environment | gender                       | (Intercept)       | 4,179201391  | 0,005453997 | 766,2640107   | 0           |
| 10 | Social environment | gender                       | Man               | -0,110774943 | 0,010212642 | -10,84684509  | 2,34541E-27 |
| 11 | Social environment | gender                       | Other/Undisclosed | 0,172798609  | 0,068441031 | 2,524780922   | 0,011582623 |
| 12 | Social environment | healthcare_experience        | (Intercept)       | 4,095931782  | 0,005860811 | 698,8677634   | 0           |
| 13 | Social environment | healthcare_experience        | Yes               | 0,13640479   | 0,009437476 | 14,45352445   | 3,54866E-47 |
| 14 | Social environment | illness_experience           | (Intercept)       | 4,155445786  | 0,005969754 | 696,0832137   | 0           |
| 15 | Social environment | illness_experience           | Yes               | -0,017122973 | 0,00939858  | -1,821867997  | 0,06848588  |
| 16 | Social environment | mental_health                | (Intercept)       | 4,143443653  | 0,004947528 | 837,4774888   | 0           |
| 17 | Social environment | mental_health                | Below average     | 0,038701178  | 0,013637212 | 2,837909897   | 0,004544325 |
| 18 | Social environment | relationship                 | (Intercept)       | 4,17431117   | 0,006940587 | 601,4349167   | 0           |
| 19 | Social environment | relationship                 | Stable            | -0,046106042 | 0,009282978 | -4,966729394  | 6,84994E-07 |
| 20 | Sleeping habits    | age                          | (Intercept)       | 4,019314151  | 0,006347659 | 633,1962915   | 0           |
| 21 | Sleeping habits    | age                          | 41-60             | 0,275328707  | 0,009481361 | 29,03894205   | 1,2227E-182 |
| 22 | Sleeping habits    | age                          | <= 40             | 0,408493336  | 0,012416816 | 32,89839614   | 7,6627E-233 |
| 23 | Sleeping habits    | brain_disease_caregiver      | (Intercept)       | 4,204831575  | 0,006048528 | 695,1826111   | 0           |
| 24 | Sleeping habits    | brain_disease_caregiver      | Yes               | -0,033418651 | 0,008868189 | -3,768373659  | 0,000164658 |
| 25 | Sleeping habits    | brain_research_participation | (Intercept)       | 4,240902101  | 0,005851321 | 724,7768249   | 0           |
| 26 | Sleeping habits    | brain_research_participation | Yes               | -0,11949339  | 0,008902901 | -13,42184874  | 6,06232E-41 |
| 27 | Sleeping habits    | cognitive_health             | (Intercept)       | 4,187848513  | 0,004563751 | 917,6330383   | 0           |
| 28 | Sleeping habits    | cognitive_health             | Below average     | 0,023887724  | 0,018606734 | 1,283821436   | 0,199215268 |
| 29 | Sleeping habits    | education                    | (Intercept)       | 4,210199862  | 0,005335244 | 789,1298      | 0           |
| 30 | Sleeping habits    | education                    | Lower             | -0,066712516 | 0,009528762 | -7,001173303  | 2,59661E-12 |
| 31 | Sleeping habits    | gender                       | (Intercept)       | 4,225273601  | 0,005228644 | 808,1011871   | 0           |
| 32 | Sleeping habits    | gender                       | Man               | -0,127531169 | 0,009793363 | -13,02220416  | 1,19094E-38 |
| 33 | Sleeping habits    | gender                       | Other/Undisclosed | 0,042442934  | 0,065089481 | 0,652070552   | 0,514361115 |
| 34 | Sleeping habits    | healthcare_experience        | (Intercept)       | 4,148275453  | 0,005631893 | 736,5685983   | 0           |
| 35 | Sleeping habits    | healthcare_experience        | Yes               | 0,106275146  | 0,009066187 | 11,72214382   | 1,16778E-31 |
| 36 | Sleeping habits    | illness_experience           | (Intercept)       | 4,174926758  | 0,005728142 | 728,8448728   | 0           |
| 37 | Sleeping habits    | illness_experience           | Yes               | 0,035566346  | 0,00901517  | 3,945166532   | 7,99426E-05 |
| 38 | Sleeping habits    | mental_health                | (Intercept)       | 4,173743555  | 0,004741275 | 880,2998651   | 0           |
| 39 | Sleeping habits    | mental_health                | Below average     | 0,117969152  | 0,013062476 | 9,031147995   | 1,80725E-19 |
| 40 | Sleeping habits    | relationship                 | (Intercept)       | 4,243890357  | 0,006649481 | 638,2287992   | 0           |
| 41 | Sleeping habits    | relationship                 | Stable            | -0,097648899 | 0,008892137 | -10,981488866 | 5,36464E-28 |
| 42 | Physical health    | age                          | (Intercept)       | 4,179307079  | 0,006269311 | 666,6293738   | 0           |
| 43 | Physical health    | age                          | 41-60             | 0,071664172  | 0,009363489 | 7,653575692   | 2,01877E-14 |
| 44 | Physical health    | age                          | <= 40             | 0,094393568  | 0,012263605 | 7,697048644   | 1,43916E-14 |
| 45 | Physical health    | brain_disease_caregiver      | (Intercept)       | 4,201811742  | 0,005830721 | 720,6333395   | 0           |
| 46 | Physical health    | brain_disease_caregiver      | Yes               | 0,04254916   | 0,008549328 | 4,976901131   | 6,5001E-07  |
| 47 | Physical health    | brain_research_participation | (Intercept)       | 4,212471132  | 0,005660671 | 744,1646839   | 0           |
| 48 | Physical health    | brain_research_participation | Yes               | 0,021131971  | 0,008611129 | 2,454030203   | 0,014132678 |
| 49 | Physical health    | cognitive_health             | (Intercept)       | 4,231106116  | 0,004394086 | 962,9092684   | 0           |
| 50 | Physical health    | cognitive_health             | Below average     | -0,158290582 | 0,017933337 | -8,82661033   | 1,14178E-18 |
| 51 | Physical health    | education                    | (Intercept)       | 4,258129542  | 0,005132966 | 829,5650535   | 0           |
| 52 | Physical health    | education                    | Lower             | -0,116601458 | 0,009170977 | -12,71418008  | 6,27052E-37 |
| 53 | Physical health    | gender                       | (Intercept)       | 4,241741357  | 0,005053379 | 839,3871819   | 0           |
| 54 | Physical health    | gender                       | Man               | -0,070671852 | 0,0094592   | -7,471228989  | 8,18156E-14 |
| 55 | Physical health    | gender                       | Other/Undisclosed | -0,013394901 | 0,062861301 | -0,213086593  | 0,831261004 |
| 56 | Physical health    | healthcare_experience        | (Intercept)       | 4,174237931  | 0,005423724 | 769,6257941   | 0           |
| 57 | Physical health    | healthcare_experience        | Yes               | 0,122796447  | 0,008732966 | 14,06125253   | 9,39943E-45 |
| 58 | Physical health    | illness_experience           | (Intercept)       | 4,242687023  | 0,005519938 | 768,6113987   | 0           |
| 59 | Physical health    | illness_experience           | Yes               | -0,052258129 | 0,008690274 | -6,013403899  | 1,83962E-09 |
| 60 | Physical health    | mental_health                | (Intercept)       | 4,230675619  | 0,004576285 | 924,4782369   | 0           |
|    | Physical health    | mental_health                | Below average     | -0,068797166 | 0,012601723 | -5,459346043  | 4,82029E-08 |
|    | Physical health    | relationship                 | (Intercept)       | 4,218414533  | 0,006422959 | 656,7711931   | 0           |
|    | Physical health    | relationship                 | Stable            | 0,005705414  | 0,008591988 | 0,66403893    | 0,506670973 |
|    | Genetics           | age                          | (Intercept)       | 4,182993144  | 0,006958698 | 601,1172167   | 0           |
|    | Genetics           | age                          | 41-60             | 0,026966088  | 0,010395518 | 2,594010898   | 0,009491382 |
|    | Genetics           | age                          | <= 40             | -0,116133326 | 0,013614791 | -8,52993848   | 1,53841E-17 |
|    | Genetics           | brain_disease_caregiver      | (Intercept)       | 4,107125842  | 0,006452073 | 636,5591065   | 0           |
|    | Genetics           | brain_disease_caregiver      | Yes               | 0,144027853  | 0,009458918 | 15,22667298   | 3,84241E-52 |
|    | Genetics           | brain_research_participation | (Intercept)       | 4,140211471  | 0,00627934  | 659,3386443   | 0           |
|    | Genetics           | brain_research_participation | Yes               | 0,078520105  | 0,009552704 | 8,219673244   | 2,12957E-16 |
|    | Genetics           | cognitive_health             | (Intercept)       | 4,177397499  | 0,004886151 | 854,9465464   | 0           |
|    | Genetics           | cognitive_health             | Below average     | -0,054292587 | 0,01994569  | -2,722020947  | 0,006492493 |
|    | Genetics           | education                    | (Intercept)       | 4,182420612  | 0,005717694 | 731,4872749   | 0           |

|    |               |                              |                   |              |             |              |             |
|----|---------------|------------------------------|-------------------|--------------|-------------|--------------|-------------|
| 1  |               |                              |                   |              |             |              |             |
| 2  |               |                              |                   |              |             |              |             |
| 3  |               |                              |                   |              |             |              |             |
| 4  | Genetics      | education                    | Lower             | -0,026413647 | 0,010211413 | -2,586678915 | 0,009695675 |
| 5  | Genetics      | gender                       | (Intercept)       | 4,203313561  | 0,005605644 | 749,835918   | 0           |
| 6  | Genetics      | gender                       | Man               | -0,097618333 | 0,010499876 | -9,297093702 | 1,5471E-20  |
| 7  | Genetics      | gender                       | Other/Undisclosed | -0,32236118  | 0,070060767 | -4,601165414 | 4,22009E-06 |
| 8  | Genetics      | healthcare_experience        | (Intercept)       | 4,159696718  | 0,006042967 | 688,3534047  | 0           |
| 9  | Genetics      | healthcare_experience        | Yes               | 0,037453149  | 0,009731321 | 3,848722124  | 0,000119004 |
| 10 | Genetics      | illness_experience           | (Intercept)       | 4,166076876  | 0,006134171 | 679,1589087  | 0           |
| 11 | Genetics      | illness_experience           | Yes               | 0,019980122  | 0,009656546 | 2,069075393  | 0,038548341 |
| 12 | Genetics      | mental_health                | (Intercept)       | 4,172121873  | 0,005084233 | 820,6001154  | 0           |
| 13 | Genetics      | mental_health                | Below average     | 0,015326289  | 0,014013406 | 1,093687608  | 0,274101599 |
| 14 | Genetics      | relationship                 | (Intercept)       | 4,140734626  | 0,007130294 | 580,7242322  | 0           |
| 15 | Genetics      | relationship                 | Stable            | 0,05974705   | 0,009535907 | 6,26548183   | 3,77184E-10 |
| 16 | Substance use | age                          | (Intercept)       | 4,431610463  | 0,006435855 | 688,5814169  | 0           |
| 17 | Substance use | age                          | 41-60             | 0,143476848  | 0,009613532 | 14,92446706  | 3,59336E-50 |
| 18 | Substance use | age                          | <= 40             | 0,124911276  | 0,012595016 | 9,917516439  | 3,82076E-23 |
| 19 | Substance use | brain_disease_caregiver      | (Intercept)       | 4,499830036  | 0,006005005 | 749,3466418  | 0           |
| 20 | Substance use | brain_disease_caregiver      | Yes               | 0,012849989  | 0,008807725 | 1,458945243  | 0,144591608 |
| 21 | Substance use | brain_research_participation | (Intercept)       | 4,513477175  | 0,005827246 | 774,5471569  | 0           |
| 22 | Substance use | brain_research_participation | Yes               | -0,01777517  | 0,008868682 | -2,0042628   | 0,04505171  |
| 23 | Substance use | cognitive_health             | (Intercept)       | 4,516684732  | 0,004523596 | 998,4720922  | 0           |
| 24 | Substance use | cognitive_health             | Below average     | -0,180931556 | 0,018445706 | -9,808871101 | 1,12348E-22 |
| 25 | Substance use | education                    | (Intercept)       | 4,524912541  | 0,005298517 | 853,9960251  | 0           |
| 26 | Substance use | education                    | Lower             | -0,060937602 | 0,0094618   | -6,440381435 | 1,21142E-10 |
| 27 | Substance use | gender                       | (Intercept)       | 4,537466114  | 0,00519662  | 873,1571719  | 0           |
| 28 | Substance use | gender                       | Man               | -0,108492117 | 0,009727944 | -11,15262578 | 8,01766E-29 |
| 29 | Substance use | gender                       | Other/Undisclosed | -0,183135406 | 0,064685894 | -2,831149009 | 0,004641478 |
| 30 | Substance use | healthcare_experience        | (Intercept)       | 4,468613052  | 0,005593123 | 798,947781   | 0           |
| 31 | Substance use | healthcare_experience        | Yes               | 0,096440255  | 0,009006785 | 10,70751199  | 1,05955E-26 |
| 32 | Substance use | illness_experience           | (Intercept)       | 4,525831046  | 0,005684904 | 796,1139172  | 0           |
| 33 | Substance use | illness_experience           | Yes               | -0,049636276 | 0,008949633 | -5,546180147 | 2,94663E-08 |
| 34 | Substance use | mental_health                | (Intercept)       | 4,509553339  | 0,004714047 | 956,6202794  | 0           |
| 35 | Substance use | mental_health                | Below average     | -0,02848122  | 0,012991148 | -2,192355944 | 0,02836217  |
| 36 | Substance use | relationship                 | (Intercept)       | 4,502599653  | 0,006616387 | 680,5224614  | 0           |
| 37 | Substance use | relationship                 | Stable            | 0,005729342  | 0,008848305 | 0,647507314  | 0,517309071 |

## QUESTION 1\_BINARY

| key | fct        | term                         | estimate          | std.error    | statistic   | p.value      |             |
|-----|------------|------------------------------|-------------------|--------------|-------------|--------------|-------------|
| 47  |            |                              |                   |              |             |              |             |
| 48  | Income     | age                          | (Intercept)       | -0,53926436  | 0,018420116 | -29,27583922 | 2,1062E-188 |
| 49  | Income     | age                          | 41-60             | -0,024019474 | 0,027564629 | -0,871387526 | 0,383542595 |
| 50  | Income     | age                          | <= 40             | -0,214753535 | 0,036942308 | -5,813213747 | 6,12847E-09 |
| 51  | Income     | brain_disease_caregiver      | (Intercept)       | -0,601034422 | 0,017256781 | -34,82888364 | 8,8907E-266 |
| 52  | Income     | brain_disease_caregiver      | Yes               | 0,03978573   | 0,025234438 | 1,57664416   | 0,114877426 |
| 53  | Income     | brain_research_participation | (Intercept)       | -0,605788573 | 0,016765358 | -36,13335101 | 6,794E-286  |
| 54  | Income     | brain_research_participation | Yes               | 0,053685023  | 0,02539167  | 2,114276998  | 0,034491616 |
| 55  | Income     | cognitive_health             | (Intercept)       | -0,58485618  | 0,012990921 | -45,02037717 | 0           |
| 56  | Income     | cognitive_health             | Below average     | 0,03926987   | 0,052721066 | 0,744861078  | 0,456355707 |
| 57  | Income     | education                    | (Intercept)       | -0,615516928 | 0,015268949 | -40,31167722 | 0           |
| 58  | Income     | education                    | Lower             | 0,104319281  | 0,027003622 | 3,863158839  | 0,00011193  |
| 59  | Income     | gender                       | (Intercept)       | -0,568418254 | 0,014894333 | -38,1633899  | 0           |
| 60  | Income     | gender                       | Man               | -0,052711528 | 0,028054206 | -1,878917099 | 0,060255814 |
|     | Income     | gender                       | Other/Undisclosed | 0,169510546  | 0,18162483  | 0,933300511  | 0,350664831 |
|     | Income     | healthcare_experience        | (Intercept)       | -0,687101643 | 0,016323225 | -42,09349731 | 0           |
|     | Income     | healthcare_experience        | Yes               | 0,265306743  | 0,02572059  | 10,31495566  | 6,03091E-25 |
|     | Income     | illness_experience           | (Intercept)       | -0,6406517   | 0,016438022 | -38,97377158 | 0           |
|     | Income     | illness_experience           | Yes               | 0,1425835    | 0,025587782 | 5,572327385  | 2,51358E-08 |
|     | Income     | mental_health                | (Intercept)       | -0,582827438 | 0,013512204 | -43,13341091 | 0           |
|     | Income     | mental_health                | Below average     | 0,002608098  | 0,037218035 | 0,070076179  | 0,944133026 |
|     | Income     | relationship                 | (Intercept)       | -0,581745127 | 0,018963462 | -30,67715798 | 1,1481E-206 |
|     | Income     | relationship                 | Stable            | -0,001320773 | 0,025358898 | -0,052083211 | 0,958462391 |
|     | Profession | age                          | (Intercept)       | 0,130044897  | 0,017802191 | 7,304994064  | 2,77279E-13 |
|     | Profession | age                          | 41-60             | 0,149825963  | 0,026700597 | 5,611333724  | 2,00773E-08 |
|     | Profession | age                          | <= 40             | 0,285279839  | 0,035327096 | 8,075383222  | 6,72651E-16 |
|     | Profession | brain_disease_caregiver      | (Intercept)       | 0,288317794  | 0,016677289 | 17,28804885  | 5,78784E-67 |
|     | Profession | brain_disease_caregiver      | Yes               | -0,120278507 | 0,024359969 | -4,937547588 | 7,91111E-07 |
|     | Profession | brain_research_participation | (Intercept)       | 0,293559041  | 0,016190445 | 18,13162306  | 1,79385E-73 |
|     | Profession | brain_research_participation | Yes               | -0,141442313 | 0,02451724  | -5,769096139 | 7,96978E-09 |
|     | Profession | cognitive_health             | (Intercept)       | 0,24421313   | 0,012541828 | 19,4718927   | 1,90115E-84 |
|     | Profession | cognitive_health             | Below average     | -0,199329914 | 0,05083534  | -3,921089424 | 8,81495E-05 |
|     | Profession | education                    | (Intercept)       | 0,321271312  | 0,014753533 | 21,77589059  | 3,9276E-105 |
|     | Profession | education                    | Lower             | -0,281749665 | 0,026129453 | -10,78283807 | 4,14884E-27 |

|    |                      |                              |                   |              |             |              |             |
|----|----------------------|------------------------------|-------------------|--------------|-------------|--------------|-------------|
| 1  |                      |                              |                   |              |             |              |             |
| 2  |                      |                              |                   |              |             |              |             |
| 3  |                      |                              |                   |              |             |              |             |
| 4  | Profession           | gender                       | (Intercept)       | 0,185568039  | 0,014368526 | 12,91489767  | 3,70937E-38 |
| 5  | Profession           | gender                       | Man               | 0,165622659  | 0,027128015 | 6,105225817  | 1,02655E-09 |
| 6  | Profession           | gender                       | Other/Undisclosed | -0,011904545 | 0,178719298 | -0,066610292 | 0,946891952 |
| 7  | Profession           | healthcare_experience        | (Intercept)       | 0,154389328  | 0,015448312 | 9,99392865   | 1,6203E-23  |
| 8  | Profession           | healthcare_experience        | Yes               | 0,203018955  | 0,025065159 | 8,0996477    | 5,51186E-16 |
| 9  | Profession           | illness_experience           | (Intercept)       | 0,255919835  | 0,015753366 | 16,24540606  | 2,40742E-59 |
| 10 | Profession           | illness_experience           | Yes               | -0,058823438 | 0,024755301 | -2,376195603 | 0,017492187 |
| 11 | Profession           | mental_health                | (Intercept)       | 0,24962127   | 0,013052142 | 19,12492723  | 1,56592E-81 |
| 12 | Profession           | mental_health                | Below average     | -0,132099706 | 0,035799509 | -3,689986505 | 0,000224266 |
| 13 | Profession           | relationship                 | (Intercept)       | 0,24387103   | 0,018311654 | 13,31780443  | 1,82393E-40 |
| 14 | Profession           | relationship                 | Stable            | -0,020961973 | 0,024476825 | -0,856400823 | 0,39177611  |
| 15 | Profession           | relationship                 | Stable            | -0,020961973 | 0,024476825 | -0,856400823 | 0,39177611  |
| 16 | Profession           | relationship                 | Stable            | -0,020961973 | 0,024476825 | -0,856400823 | 0,39177611  |
| 17 | Education            | age                          | (Intercept)       | 0,442063001  | 0,018193162 | 24,29830464  | 2,0429E-130 |
| 18 | Education            | age                          | 41-60             | -0,06949878  | 0,027072761 | -2,567110946 | 0,01025498  |
| 19 | Education            | age                          | <= 40             | 0,106624672  | 0,035933984 | 2,967237653  | 0,003004886 |
| 20 | Education            | brain_disease_caregiver      | (Intercept)       | 0,472325997  | 0,016959025 | 27,85101125  | 1,0472E-170 |
| 21 | Education            | brain_disease_caregiver      | Yes               | -0,084117853 | 0,024752089 | -3,398414368 | 0,000677777 |
| 22 | Education            | brain_disease_caregiver      | Yes               | -0,084117853 | 0,024752089 | -3,398414368 | 0,000677777 |
| 23 | Education            | brain_research_participation | (Intercept)       | 0,439646397  | 0,016396534 | 26,8133737   | 2,2566E-158 |
| 24 | Education            | brain_research_participation | Yes               | -0,015320772 | 0,02492802  | -0,614600435 | 0,538818627 |
| 25 | Education            | brain_research_participation | Yes               | -0,015320772 | 0,02492802  | -0,614600435 | 0,538818627 |
| 26 | Education            | cognitive_health             | (Intercept)       | 0,456821652  | 0,012771737 | 35,76816878  | 3,453E-280  |
| 27 | Education            | cognitive_health             | Below average     | -0,385232572 | 0,05091109  | -7,566771244 | 3,82615E-14 |
| 28 | Education            | cognitive_health             | Below average     | -0,385232572 | 0,05091109  | -7,566771244 | 3,82615E-14 |
| 29 | Education            | education                    | (Intercept)       | 0,589287708  | 0,015198005 | 38,77401723  | 0           |
| 30 | Education            | education                    | Lower             | -0,483706467 | 0,026399992 | -18,32222017 | 5,50217E-75 |
| 31 | Education            | gender                       | (Intercept)       | 0,398011128  | 0,014588148 | 27,2831835   | 6,7161E-164 |
| 32 | Education            | gender                       | Man               | 0,121306534  | 0,027591224 | 4,396562243  | 1,09979E-05 |
| 33 | Education            | gender                       | Other/Undisclosed | 0,202045629  | 0,186091786 | 1,085731044  | 0,277598002 |
| 34 | Education            | healthcare_experience        | (Intercept)       | 0,324087549  | 0,015600897 | 20,77364856  | 7,49436E-96 |
| 35 | Education            | healthcare_experience        | Yes               | 0,287932198  | 0,025633626 | 11,23259715  | 2,82064E-29 |
| 36 | Education            | healthcare_experience        | Yes               | 0,287932198  | 0,025633626 | 11,23259715  | 2,82064E-29 |
| 37 | Education            | illness_experience           | (Intercept)       | 0,474189354  | 0,016062801 | 29,5209633   | 1,5497E-191 |
| 38 | Education            | illness_experience           | Yes               | -0,101405914 | 0,02513255  | -4,034843801 | 5,46386E-05 |
| 39 | Education            | illness_experience           | Yes               | -0,101405914 | 0,02513255  | -4,034843801 | 5,46386E-05 |
| 40 | Education            | mental_health                | (Intercept)       | 0,476875009  | 0,013318404 | 35,80571689  | 8,9985E-281 |
| 41 | Education            | mental_health                | Below average     | -0,325035282 | 0,035916051 | -9,049861234 | 1,4315E-19  |
| 42 | Education            | mental_health                | Below average     | -0,325035282 | 0,035916051 | -9,049861234 | 1,4315E-19  |
| 43 | Education            | relationship                 | (Intercept)       | 0,418759604  | 0,01857108  | 22,54901697  | 1,373E-112  |
| 44 | Education            | relationship                 | Stable            | 0,025545867  | 0,024867335 | 1,027286058  | 0,304285785 |
| 45 | Diet                 | age                          | (Intercept)       | 0,694455848  | 0,0188941   | 36,75516855  | 9,6135E-296 |
| 46 | Diet                 | age                          | 41-60             | 0,433716532  | 0,029734096 | 14,58650496  | 3,4229E-48  |
| 47 | Diet                 | age                          | <= 40             | 0,46641219   | 0,039817535 | 11,71373844  | 1,08393E-31 |
| 48 | Diet                 | brain_disease_caregiver      | (Intercept)       | 0,845670944  | 0,018035442 | 46,88939397  | 0           |
| 49 | Diet                 | brain_disease_caregiver      | Yes               | 0,169735208  | 0,026973996 | 6,292549716  | 3,12293E-10 |
| 50 | Diet                 | brain_disease_caregiver      | Yes               | 0,169735208  | 0,026973996 | 6,292549716  | 3,12293E-10 |
| 51 | Diet                 | brain_research_participation | (Intercept)       | 0,9045679    | 0,017709389 | 51,07843629  | 0           |
| 52 | Diet                 | brain_research_participation | Yes               | 0,043153394  | 0,027092183 | 1,592835606  | 0,111197075 |
| 53 | Diet                 | brain_research_participation | Yes               | 0,043153394  | 0,027092183 | 1,592835606  | 0,111197075 |
| 54 | Diet                 | cognitive_health             | (Intercept)       | 0,952853915  | 0,013912287 | 68,49009767  | 0           |
| 55 | Diet                 | cognitive_health             | Below average     | -0,457607964 | 0,052775106 | -8,670905575 | 4,28697E-18 |
| 56 | Diet                 | cognitive_health             | Below average     | -0,457607964 | 0,052775106 | -8,670905575 | 4,28697E-18 |
| 57 | Diet                 | education                    | (Intercept)       | 1,000870593  | 0,016454476 | 60,82664667  | 0           |
| 58 | Diet                 | education                    | Lower             | -0,23990382  | 0,028432158 | -8,437763315 | 3,23468E-17 |
| 59 | Diet                 | education                    | Lower             | -0,23990382  | 0,028432158 | -8,437763315 | 3,23468E-17 |
| 60 | Diet                 | gender                       | (Intercept)       | 1,030930198  | 0,016279647 | 63,32632305  | 0           |
|    | Diet                 | gender                       | Man               | -0,359533466 | 0,028990075 | -12,40195027 | 2,5504E-35  |
|    | Diet                 | gender                       | Other/Undisclosed | -0,064489682 | 0,19926355  | -0,323640136 | 0,746210498 |
|    | Diet                 | healthcare_experience        | (Intercept)       | 0,801730164  | 0,016682324 | 48,0586623   | 0           |
|    | Diet                 | healthcare_experience        | Yes               | 0,329233392  | 0,028142096 | 11,6989649   | 1,29018E-31 |
|    | Diet                 | healthcare_experience        | Yes               | 0,329233392  | 0,028142096 | 11,6989649   | 1,29018E-31 |
|    | Diet                 | illness_experience           | (Intercept)       | 0,976230512  | 0,017553642 | 55,6141287   | 0           |
|    | Diet                 | illness_experience           | Yes               | -0,129579859 | 0,027194589 | -4,764913339 | 1,88935E-06 |
|    | Diet                 | illness_experience           | Yes               | -0,129579859 | 0,027194589 | -4,764913339 | 1,88935E-06 |
|    | Diet                 | mental_health                | (Intercept)       | 0,958825024  | 0,014497252 | 66,13839781  | 0           |
|    | Diet                 | mental_health                | Below average     | -0,258607737 | 0,038200998 | -6,769659181 | 1,29086E-11 |
|    | Diet                 | mental_health                | Below average     | -0,258607737 | 0,038200998 | -6,769659181 | 1,29086E-11 |
|    | Diet                 | relationship                 | (Intercept)       | 0,944510888  | 0,020264862 | 46,60830597  | 0           |
|    | Diet                 | relationship                 | Stable            | -0,03818322  | 0,027016688 | -1,413319814 | 0,157561711 |
|    | Diet                 | relationship                 | Stable            | -0,03818322  | 0,027016688 | -1,413319814 | 0,157561711 |
|    | Physical environment | age                          | (Intercept)       | 0,838583863  | 0,019363707 | 43,30699047  | 0           |
|    | Physical environment | age                          | 41-60             | 0,225617533  | 0,02973601  | 7,587350582  | 3,26513E-14 |
|    | Physical environment | age                          | <= 40             | 0,093070081  | 0,038418483 | 2,422533979  | 0,015412684 |
|    | Physical environment | brain_disease_caregiver      | (Intercept)       | 0,920589759  | 0,018294191 | 50,3214252   | 0           |
|    | Physical environment | brain_disease_caregiver      | Yes               | 0,033576958  | 0,026925176 | 1,247046943  | 0,212380286 |
|    | Physical environment | brain_disease_caregiver      | Yes               | 0,033576958  | 0,026925176 | 1,247046943  | 0,212380286 |
|    | Physical environment | brain_research_participation | (Intercept)       | 0,928592895  | 0,017784239 | 52,2143722   | 0           |
|    | Physical environment | brain_research_participation | Yes               | 0,017525965  | 0,027109575 | 0,646486168  | 0,517964552 |
|    | Physical environment | brain_research_participation | Yes               | 0,017525965  | 0,027109575 | 0,646486168  | 0,517964552 |
|    | Physical environment | cognitive_health             | (Intercept)       | 0,950524171  | 0,013886768 | 68,44819097  | 0           |
|    | Physical environment | cognitive_health             | Below average     | -0,229827039 | 0,054413561 | -4,223708874 | 2,40314E-05 |
|    | Physical environment | cognitive_health             | Below average     | -0,229827039 | 0,054413561 | -4,223708874 | 2,40314E-05 |
|    | Physical environment | education                    | (Intercept)       | 0,918967711  | 0,01613726  | 56,9469467   | 0           |
|    | Physical environment | education                    | Lower             | 0,055311474  | 0,029074402 | 1,902411427  | 0,057117388 |
|    | Physical environment | education                    | Lower             | 0,055311474  | 0,029074402 | 1,902411427  | 0,057117388 |
|    | Physical environment | gender                       | (Intercept)       | 0,979069123  | 0,0160639   | 60,94840893  | 0           |
|    | Physical environment | gender                       | Man               | -0,151757304 | 0,029410606 | -5,159951632 | 2,47014E-07 |
|    | Physical environment | gender                       | Other/Undisclosed | 0,273693845  | 0,214886851 | 1,273664925  | 0,202782192 |
|    | Physical environment | gender                       | Other/Undisclosed | 0,273693845  | 0,214886851 | 1,273664925  | 0,202782192 |
|    | Physical environment | healthcare_experience        | (Intercept)       | 0,870346765  | 0,016887477 | 51,53799763  | 0           |



|    |                      |                              |                   |              |             |              |             |
|----|----------------------|------------------------------|-------------------|--------------|-------------|--------------|-------------|
| 1  |                      |                              |                   |              |             |              |             |
| 2  |                      |                              |                   |              |             |              |             |
| 3  |                      |                              |                   |              |             |              |             |
| 4  | Physical environment | healthcare_experience        | Yes               | 0,174776839  | 0,027862831 | 6,272759549  | 3,54704E-10 |
| 5  | Physical environment | illness_experience           | (Intercept)       | 0,882972     | 0,017176812 | 51,40488206  | 0           |
| 6  | Physical environment | illness_experience           | Yes               | 0,134310043  | 0,027546221 | 4,87580654   | 1,08365E-06 |
| 7  | Physical environment | mental_health                | (Intercept)       | 0,948154034  | 0,014441107 | 65,65660454  | 0           |
| 8  | Physical environment | mental_health                | Below average     | -0,089744948 | 0,039169834 | -2,291175081 | 0,02195329  |
| 9  | Physical environment | relationship                 | (Intercept)       | 0,973603269  | 0,020383221 | 47,76493594  | 0           |
| 10 | Physical environment | relationship                 | Stable            | -0,06655942  | 0,02708701  | -2,457245033 | 0,014000715 |
| 11 | Life goals           | age                          | (Intercept)       | 1,061802144  | 0,020302684 | 52,29860873  | 0           |
| 12 | Life goals           | age                          | 41-60             | -0,052086621 | 0,030135281 | -1,728426597 | 0,083911771 |
| 13 | Life goals           | age                          | <= 40             | -0,343481625 | 0,037728812 | -9,103960713 | 8,70963E-20 |
| 14 | Life goals           | brain_disease_caregiver      | (Intercept)       | 1,001241959  | 0,01860127  | 53,8265372   | 0           |
| 15 | Life goals           | brain_disease_caregiver      | Yes               | -0,039007435 | 0,027147102 | -1,436891278 | 0,150748888 |
| 16 | Life goals           | brain_research_participation | (Intercept)       | 1,045256188  | 0,018243473 | 57,2948042   | 0           |
| 17 | Life goals           | brain_research_participation | Yes               | -0,141418625 | 0,027256681 | -5,188402265 | 2,12106E-07 |
| 18 | Life goals           | cognitive_health             | (Intercept)       | 0,98901954   | 0,013992694 | 70,68113617  | 0           |
| 19 | Life goals           | cognitive_health             | Below average     | -0,098046616 | 0,055980588 | -1,751439544 | 0,079870226 |
| 20 | Life goals           | education                    | (Intercept)       | 1,003308691  | 0,016427963 | 61,07322487  | 0           |
| 21 | Life goals           | education                    | Lower             | -0,064088474 | 0,029050492 | -2,206106333 | 0,027376555 |
| 22 | Life goals           | gender                       | (Intercept)       | 1,018023721  | 0,016192375 | 62,87056335  | 0           |
| 23 | Life goals           | gender                       | Man               | -0,118885455 | 0,029753566 | -3,995670792 | 6,45113E-05 |
| 24 | Life goals           | gender                       | Other/Undisclosed | -0,129131963 | 0,195959912 | -0,658971327 | 0,509914181 |
| 25 | Life goals           | healthcare_experience        | (Intercept)       | 0,891797692  | 0,016945561 | 52,62721507  | 0           |
| 26 | Life goals           | healthcare_experience        | Yes               | 0,244885429  | 0,028279264 | 8,659540296  | 4,73671E-18 |
| 27 | Life goals           | illness_experience           | (Intercept)       | 0,97059392   | 0,017494923 | 55,47860394  | 0           |
| 28 | Life goals           | illness_experience           | Yes               | 0,030895682  | 0,027651403 | 1,117327831  | 0,26385418  |
| 29 | Life goals           | mental_health                | (Intercept)       | 1,013529029  | 0,014640063 | 69,22982623  | 0           |
| 30 | Life goals           | mental_health                | Below average     | -0,222496007 | 0,038765766 | -5,739497266 | 9,4958E-09  |
| 31 | Life goals           | relationship                 | (Intercept)       | 0,976145404  | 0,020373054 | 47,91355223  | 0           |
| 32 | Life goals           | relationship                 | Stable            | 0,012298668  | 0,027278469 | 0,450856236  | 0,652093167 |
| 33 | Social environment   | age                          | (Intercept)       | 1,382753142  | 0,022165611 | 62,38281197  | 0           |
| 34 | Social environment   | age                          | 41-60             | 0,285588178  | 0,034903611 | 8,182195788  | 2,78718E-16 |
| 35 | Social environment   | age                          | <= 40             | 0,546958222  | 0,050039371 | 10,93055755  | 8,23409E-28 |
| 36 | Social environment   | brain_disease_caregiver      | (Intercept)       | 1,545131473  | 0,021664613 | 71,32052198  | 0           |
| 37 | Social environment   | brain_disease_caregiver      | Yes               | 0,04499884   | 0,032022319 | 1,405233659  | 0,159951808 |
| 38 | Social environment   | brain_research_participation | (Intercept)       | 1,598559913  | 0,021400378 | 74,69774177  | 0           |
| 39 | Social environment   | brain_research_participation | Yes               | -0,074551742 | 0,032110371 | -2,321734052 | 0,02024726  |
| 40 | Social environment   | cognitive_health             | (Intercept)       | 1,593589867  | 0,016606395 | 95,96241805  | 0           |
| 41 | Social environment   | cognitive_health             | Below average     | -0,408396957 | 0,060412216 | -6,76017173  | 1,37828E-11 |
| 42 | Social environment   | education                    | (Intercept)       | 1,625935505  | 0,019641595 | 82,78021824  | 0           |
| 43 | Social environment   | education                    | Lower             | -0,183882712 | 0,033705492 | -5,455571188 | 4,88157E-08 |
| 44 | Social environment   | gender                       | (Intercept)       | 1,662586444  | 0,019533099 | 85,11636769  | 0           |
| 45 | Social environment   | gender                       | Man               | -0,323047282 | 0,034066596 | -9,482816628 | 2,4751E-21  |
| 46 | Social environment   | gender                       | Other/Undisclosed | 0,579894686  | 0,304206445 | 1,90625378   | 0,056617288 |
| 47 | Social environment   | healthcare_experience        | (Intercept)       | 1,425770707  | 0,019469765 | 73,22998987  | 0           |
| 48 | Social environment   | healthcare_experience        | Yes               | 0,394338167  | 0,034136115 | 11,55193469  | 7,21771E-31 |
| 49 | Social environment   | illness_experience           | (Intercept)       | 1,586344881  | 0,020794281 | 76,28755525  | 0           |
| 50 | Social environment   | illness_experience           | Yes               | -0,050200609 | 0,032421353 | -1,548381064 | 0,121530578 |
| 51 | Social environment   | mental_health                | (Intercept)       | 1,562029086  | 0,017096682 | 91,36445579  | 0           |
| 52 | Social environment   | mental_health                | Below average     | 0,029604199  | 0,047527018 | 0,622891979  | 0,533355509 |
| 53 | Social environment   | relationship                 | (Intercept)       | 1,581388602  | 0,024144703 | 65,49629585  | 0           |
| 54 | Social environment   | relationship                 | Stable            | -0,027610056 | 0,032164877 | -0,858391456 | 0,390676344 |
| 55 | Sleeping habits      | age                          | (Intercept)       | 1,361352973  | 0,022032659 | 61,78795514  | 0           |
| 56 | Sleeping habits      | age                          | 41-60             | 0,724875677  | 0,03838322  | 18,8852234   | 1,50898E-79 |
| 57 | Sleeping habits      | age                          | <= 40             | 1,02204579   | 0,058028682 | 17,6127694   | 1,96587E-69 |
| 58 | Sleeping habits      | brain_disease_caregiver      | (Intercept)       | 1,766035337  | 0,023359597 | 75,60213112  | 0           |
| 59 | Sleeping habits      | brain_disease_caregiver      | Yes               | -0,056795977 | 0,033889986 | -1,675892612 | 0,093759229 |
| 60 | Sleeping habits      | brain_research_participation | (Intercept)       | 1,896457026  | 0,02376137  | 79,81261412  | 0           |
|    | Sleeping habits      | brain_research_participation | Yes               | -0,340554561 | 0,033914482 | -10,04156758 | 1,00071E-23 |
|    | Sleeping habits      | cognitive_health             | (Intercept)       | 1,744536678  | 0,01748824  | 99,7548437   | 0           |
|    | Sleeping habits      | cognitive_health             | Below average     | -0,084146438 | 0,069380543 | -1,212824732 | 0,225196838 |
|    | Sleeping habits      | education                    | (Intercept)       | 1,79901464   | 0,020861411 | 86,23648132  | 0           |
|    | Sleeping habits      | education                    | Lower             | -0,18231514  | 0,035708674 | -5,105626135 | 3,29701E-07 |
|    | Sleeping habits      | gender                       | (Intercept)       | 1,860431574  | 0,020949758 | 88,80444103  | 0           |
|    | Sleeping habits      | gender                       | Man               | -0,389245755 | 0,035825049 | -10,86518416 | 1,68882E-27 |
|    | Sleeping habits      | gender                       | Other/Undisclosed | 0,076509905  | 0,268230159 | 0,285239758  | 0,775460463 |
|    | Sleeping habits      | healthcare_experience        | (Intercept)       | 1,631070444  | 0,020806685 | 78,39165202  | 0           |
|    | Sleeping habits      | healthcare_experience        | Yes               | 0,299727687  | 0,035853953 | 8,359683118  | 6,28869E-17 |
|    | Sleeping habits      | illness_experience           | (Intercept)       | 1,692894931  | 0,021564734 | 78,50293575  | 0           |
|    | Sleeping habits      | illness_experience           | Yes               | 0,117924836  | 0,034804626 | 3,388194317  | 0,000703544 |
|    | Sleeping habits      | mental_health                | (Intercept)       | 1,704847171  | 0,017944815 | 95,00500011  | 0           |

|    |                 |                              |                   |              |             |              |             |
|----|-----------------|------------------------------|-------------------|--------------|-------------|--------------|-------------|
| 1  |                 |                              |                   |              |             |              |             |
| 2  |                 |                              |                   |              |             |              |             |
| 3  |                 |                              |                   |              |             |              |             |
| 4  | Sleeping habits | mental_health                | Below average     | 0,286014366  | 0,054173779 | 5,279571994  | 1,29486E-07 |
| 5  | Sleeping habits | relationship                 | (Intercept)       | 1,858954441  | 0,026604468 | 69,87376798  | 0           |
| 6  | Sleeping habits | relationship                 | Stable            | -0,207297452 | 0,034494781 | -6,009530817 | 1,86061E-09 |
| 7  | Physical health | age                          | (Intercept)       | 1,86802833   | 0,026097454 | 71,57894963  | 0           |
| 8  | Physical health | age                          | 41-60             | 0,131336573  | 0,040070826 | 3,277610779  | 0,001046896 |
| 9  | Physical health | age                          | <= 40             | 0,158555879  | 0,053377831 | 2,970444395  | 0,002973692 |
| 10 | Physical health | brain_disease_caregiver      | (Intercept)       | 1,895345732  | 0,024489178 | 77,39523694  | 0           |
| 11 | Physical health | brain_disease_caregiver      | Yes               | 0,10091705   | 0,036654418 | 2,753202934  | 0,00590153  |
| 12 | Physical health | brain_research_participation | (Intercept)       | 1,918336206  | 0,023970229 | 80,02995004  | 0           |
| 13 | Physical health | brain_research_participation | Yes               | 0,053845156  | 0,036888041 | 1,459691399  | 0,144374907 |
| 14 | Physical health | cognitive_health             | (Intercept)       | 1,983738656  | 0,019094385 | 103,891202   | 0           |
| 15 | Physical health | cognitive_health             | Below average     | -0,579906675 | 0,064787151 | -8,950951902 | 3,5243E-19  |
| 16 | Physical health | education                    | (Intercept)       | 2,047902483  | 0,022893804 | 89,45226042  | 0           |
| 17 | Physical health | education                    | Lower             | -0,314349956 | 0,037888731 | -8,2966611   | 1,07078E-16 |
| 18 | Physical health | gender                       | (Intercept)       | 2,022850313  | 0,022279666 | 90,79356692  | 0           |
| 19 | Physical health | gender                       | Man               | -0,263187069 | 0,03898787  | -6,750486022 | 1,47351E-11 |
| 20 | Physical health | gender                       | Other/Undisclosed | -0,285158065 | 0,249774337 | -1,141662785 | 0,253594216 |
| 21 | Physical health | healthcare_experience        | (Intercept)       | 1,792174665  | 0,022010617 | 81,42319098  | 0           |
| 22 | Physical health | healthcare_experience        | Yes               | 0,428139241  | 0,039411554 | 10,86329247  | 1,72418E-27 |
| 23 | Physical health | illness_experience           | (Intercept)       | 2,022851829  | 0,024328413 | 83,14770843  | 0           |
| 24 | Physical health | illness_experience           | Yes               | -0,193617999 | 0,0367342   | -5,270782994 | 1,35843E-07 |
| 25 | Physical health | mental_health                | (Intercept)       | 1,983558679  | 0,019867386 | 99,83994295  | 0           |
| 26 | Physical health | mental_health                | Below average     | -0,291648985 | 0,049980297 | -5,835279201 | 5,37006E-09 |
| 27 | Physical health | relationship                 | (Intercept)       | 1,904101924  | 0,027052108 | 70,38645295  | 0           |
| 28 | Physical health | relationship                 | Stable            | 0,067383143  | 0,036597943 | 1,841172968  | 0,065596215 |
| 29 | Genetics        | age                          | (Intercept)       | 1,617307863  | 0,023883265 | 67,71719989  | 0           |
| 30 | Genetics        | age                          | 41-60             | 0,009705195  | 0,035743124 | 0,271526201  | 0,785986351 |
| 31 | Genetics        | age                          | <= 40             | -0,433984051 | 0,042568763 | -10,19489455 | 2,08971E-24 |
| 32 | Genetics        | brain_disease_caregiver      | (Intercept)       | 1,370460662  | 0,020527234 | 66,76304534  | 0           |
| 33 | Genetics        | brain_disease_caregiver      | Yes               | 0,394365413  | 0,032373159 | 12,18186392  | 3,88305E-34 |
| 34 | Genetics        | brain_research_participation | (Intercept)       | 1,451655745  | 0,020415988 | 71,1038709   | 0           |
| 35 | Genetics        | brain_research_participation | Yes               | 0,216431566  | 0,032368321 | 6,686524248  | 2,28533E-11 |
| 36 | Genetics        | cognitive_health             | (Intercept)       | 1,55330154   | 0,016390119 | 94,77060787  | 0           |
| 37 | Genetics        | cognitive_health             | Below average     | -0,186600873 | 0,063362003 | -2,944996449 | 0,003229584 |
| 38 | Genetics        | education                    | (Intercept)       | 1,559444706  | 0,01921763  | 81,14656817  | 0           |
| 39 | Genetics        | education                    | Lower             | -0,056643633 | 0,033896559 | -1,671073273 | 0,094707206 |
| 40 | Genetics        | gender                       | (Intercept)       | 1,614724377  | 0,019221725 | 84,00517325  | 0           |
| 41 | Genetics        | gender                       | Man               | -0,230673247 | 0,034206576 | -6,743535127 | 1,54579E-11 |
| 42 | Genetics        | gender                       | Other/Undisclosed | -0,774973722 | 0,195061184 | -3,972977642 | 7,09797E-05 |
| 43 | Genetics        | healthcare_experience        | (Intercept)       | 1,49789952   | 0,019915537 | 75,21261165  | 0           |
| 44 | Genetics        | healthcare_experience        | Yes               | 0,115620957  | 0,032832664 | 3,521522291  | 0,000429077 |
| 45 | Genetics        | illness_experience           | (Intercept)       | 1,518912463  | 0,020348107 | 74,64637747  | 0           |
| 46 | Genetics        | illness_experience           | Yes               | 0,056496915  | 0,032387248 | 1,744418499  | 0,081086142 |
| 47 | Genetics        | mental_health                | (Intercept)       | 1,539800569  | 0,016978113 | 90,69327101  | 0           |
| 48 | Genetics        | mental_health                | Below average     | 0,012665063  | 0,04696321  | 0,269680514  | 0,787406053 |
| 49 | Genetics        | relationship                 | (Intercept)       | 1,440838081  | 0,023093348 | 62,39191077  | 0           |
| 50 | Genetics        | relationship                 | Stable            | 0,184856521  | 0,031734608 | 5,825076575  | 5,70864E-09 |
| 51 | Substance use   | age                          | (Intercept)       | 2,258409577  | 0,030325963 | 74,47115679  | 0           |
| 52 | Substance use   | age                          | 41-60             | 0,532467269  | 0,051965672 | 10,2465195   | 1,22682E-24 |
| 53 | Substance use   | age                          | <= 40             | 0,355832583  | 0,066535044 | 5,34804758   | 8,89081E-08 |
| 54 | Substance use   | brain_disease_caregiver      | (Intercept)       | 2,435641288  | 0,03030728  | 80,36489251  | 0           |
| 55 | Substance use   | brain_disease_caregiver      | Yes               | 0,121746279  | 0,045727517 | 2,662429279  | 0,007757887 |
| 56 | Substance use   | brain_research_participation | (Intercept)       | 2,488936392  | 0,030079218 | 82,74604747  | 0           |
| 57 | Substance use   | brain_research_participation | Yes               | 0,004031863  | 0,045823046 | 0,087987659  | 0,929886485 |
| 58 | Substance use   | cognitive_health             | (Intercept)       | 2,53905741   | 0,023892821 | 106,2686302  | 0           |
| 59 | Substance use   | cognitive_health             | Below average     | -0,627951183 | 0,077201989 | -8,13387316  | 4,15788E-16 |
| 60 | Substance use   | education                    | (Intercept)       | 2,587194267  | 0,028540599 | 90,64961354  | 0           |
|    | Substance use   | education                    | Lower             | -0,283843184 | 0,04710967  | -6,02515755  | 1,68945E-09 |
|    | Substance use   | gender                       | (Intercept)       | 2,631192734  | 0,02857342  | 92,08532808  | 0           |
|    | Substance use   | gender                       | Man               | -0,421524315 | 0,047475504 | -8,878774907 | 6,76007E-19 |
|    | Substance use   | gender                       | Other/Undisclosed | -0,83021661  | 0,256020132 | -3,242778623 | 0,001183701 |
|    | Substance use   | healthcare_experience        | (Intercept)       | 2,35014353   | 0,027297246 | 86,09452819  | 0           |
|    | Substance use   | healthcare_experience        | Yes               | 0,406320626  | 0,04924657  | 8,250739553  | 1,57417E-16 |
|    | Substance use   | illness_experience           | (Intercept)       | 2,579823206  | 0,030519084 | 84,53147558  | 0           |
|    | Substance use   | illness_experience           | Yes               | -0,209737212 | 0,045660338 | -4,593422291 | 4,36035E-06 |
|    | Substance use   | mental_health                | (Intercept)       | 2,508055301  | 0,024531502 | 102,2381483  | 0           |
|    | Substance use   | mental_health                | Below average     | -0,126031001 | 0,064587992 | -1,951307007 | 0,051020536 |
|    | Substance use   | relationship                 | (Intercept)       | 2,446120625  | 0,033539141 | 72,93331135  | 0           |
|    | Substance use   | relationship                 | Stable            | 0,080908844  | 0,045548313 | 1,776330195  | 0,075678509 |

1  
2  
3

## QUESTION 1\_ORDINAL

| key        | fct                          | term               | estimate     | std.error   | statistic    | coef.type   |
|------------|------------------------------|--------------------|--------------|-------------|--------------|-------------|
| Income     | age                          | 41-60              | 0,037670283  | 0,024458858 | 1,540148897  | coefficient |
| Income     | age                          | <= 40              | 0,277983592  | 0,032365126 | 8,588985438  | coefficient |
| Income     | age                          | Very strong Strong | -2,668635467 | 0,027657653 | -96,48813936 | scale       |
| Income     | age                          | Strong Moderate    | -0,525808036 | 0,017213048 | -30,5470616  | scale       |
| Income     | age                          | Moderate Weak      | 1,471693854  | 0,019505729 | 75,44931274  | scale       |
| Income     | age                          | Weak No influence  | 3,25977555   | 0,033468654 | 97,39786756  | scale       |
| Income     | brain_disease_caregiver      | Yes                | -0,036593488 | 0,022331295 | -1,638663963 | coefficient |
| Income     | brain_disease_caregiver      | Very strong Strong | -2,741256536 | 0,027234637 | -100,6533179 | scale       |
| Income     | brain_disease_caregiver      | Strong Moderate    | -0,599618331 | 0,016360353 | -36,65069634 | scale       |
| Income     | brain_disease_caregiver      | Moderate Weak      | 1,393005585  | 0,018360209 | 75,8708986   | scale       |
| Income     | brain_disease_caregiver      | Weak No influence  | 3,179201667  | 0,032712359 | 97,18656042  | scale       |
| Income     | brain_research_participation | Yes                | -0,046738707 | 0,022476687 | -2,079430481 | coefficient |
| Income     | brain_research_participation | Very strong Strong | -2,744560621 | 0,027001693 | -101,6440199 | scale       |
| Income     | brain_research_participation | Strong Moderate    | -0,602866414 | 0,015958678 | -37,77671408 | scale       |
| Income     | brain_research_participation | Moderate Weak      | 1,389805897  | 0,017997518 | 77,22208702  | scale       |
| Income     | brain_research_participation | Weak No influence  | 3,176016745  | 0,032508314 | 97,69859927  | scale       |
| Income     | cognitive_health             | Below average      | 0,102148089  | 0,048395749 | 2,110683096  | coefficient |
| Income     | cognitive_health             | Very strong Strong | -2,717888562 | 0,025254292 | -107,6208571 | scale       |
| Income     | cognitive_health             | Strong Moderate    | -0,576872676 | 0,012866005 | -44,83696972 | scale       |
| Income     | cognitive_health             | Moderate Weak      | 1,416059699  | 0,015463701 | 91,57314408  | scale       |
| Income     | cognitive_health             | Weak No influence  | 3,20202114   | 0,031208541 | 102,6007957  | scale       |
| Income     | education                    | Lower              | -0,085169692 | 0,024127559 | -3,52997556  | coefficient |
| Income     | education                    | Very strong Strong | -2,750924662 | 0,026291269 | -104,6326301 | scale       |
| Income     | education                    | Strong Moderate    | -0,608947542 | 0,014669541 | -41,51101536 | scale       |
| Income     | education                    | Moderate Weak      | 1,384324171  | 0,016832927 | 82,23906339  | scale       |
| Income     | education                    | Weak No influence  | 3,169560177  | 0,031879242 | 99,4239504   | scale       |
| Income     | gender                       | Man                | 0,115358357  | 0,024894858 | 4,633822587  | coefficient |
| Income     | gender                       | Other/Undisclosed  | -0,175046228 | 0,171574713 | -1,020233261 | coefficient |
| Income     | gender                       | Very strong Strong | -2,693032489 | 0,026003231 | -103,5653041 | scale       |
| Income     | gender                       | Strong Moderate    | -0,551578273 | 0,014339426 | -38,46585321 | scale       |
| Income     | gender                       | Moderate Weak      | 1,442337446  | 0,016839017 | 85,65449036  | scale       |
| Income     | gender                       | Weak No influence  | 3,228708542  | 0,031946382 | 101,0664849  | scale       |
| Income     | healthcare_experience        | Yes                | -0,286267405 | 0,022928562 | -12,48518794 | coefficient |
| Income     | healthcare_experience        | Very strong Strong | -2,843143851 | 0,026987755 | -105,3494037 | scale       |
| Income     | healthcare_experience        | Strong Moderate    | -0,696293179 | 0,015618166 | -44,58226222 | scale       |
| Income     | healthcare_experience        | Moderate Weak      | 1,304826481  | 0,017294201 | 75,44878862  | scale       |
| Income     | healthcare_experience        | Weak No influence  | 3,094086317  | 0,032055788 | 96,52192418  | scale       |
| Income     | illness_experience           | Yes                | -0,12241747  | 0,022758548 | -5,378966536 | coefficient |
| Income     | illness_experience           | Very strong Strong | -2,774767575 | 0,026874844 | -103,2477635 | scale       |
| Income     | illness_experience           | Strong Moderate    | -0,631997567 | 0,015606218 | -40,49652433 | scale       |
| Income     | illness_experience           | Moderate Weak      | 1,362317022  | 0,017558077 | 77,58919419  | scale       |
| Income     | illness_experience           | Weak No influence  | 3,14862803   | 0,032260245 | 97,60087202  | scale       |
| Income     | mental_health                | Below average      | 0,056292837  | 0,033421319 | 1,684339187  | coefficient |
| Income     | mental_health                | Very strong Strong | -2,716467978 | 0,025459771 | -106,6964822 | scale       |
| Income     | mental_health                | Strong Moderate    | -0,575456415 | 0,013269166 | -43,36794037 | scale       |
| Income     | mental_health                | Moderate Weak      | 1,417630211  | 0,015817727 | 89,62288021  | scale       |
| Income     | mental_health                | Weak No influence  | 3,203292333  | 0,031385995 | 102,061202   | scale       |
| Income     | relationship                 | Stable             | -0,002458191 | 0,022440637 | -0,109541961 | coefficient |
| Income     | relationship                 | Very strong Strong | -2,724955399 | 0,028082199 | -97,03497298 | scale       |
| Income     | relationship                 | Strong Moderate    | -0,583852297 | 0,01779681  | -32,80657109 | scale       |
| Income     | relationship                 | Moderate Weak      | 1,408853345  | 0,019720728 | 71,44022856  | scale       |
| Income     | relationship                 | Weak No influence  | 3,194329021  | 0,033498134 | 95,35841578  | scale       |
| Profession | age                          | 41-60              | -0,171921328 | 0,024521306 | -7,011100096 | coefficient |
| Profession | age                          | <= 40              | -0,382555503 | 0,032562977 | -11,7481735  | coefficient |
| Profession | age                          | Very strong Strong | -2,036029718 | 0,022010789 | -92,50144332 | scale       |
| Profession | age                          | Strong Moderate    | 0,107936888  | 0,017003074 | 6,348080888  | scale       |
| Profession | age                          | Moderate Weak      | 2,166291682  | 0,023750093 | 91,21192488  | scale       |
| Profession | age                          | Weak No influence  | 3,751464331  | 0,044117973 | 85,03256353  | scale       |
| Profession | brain_disease_caregiver      | Yes                | 0,134686858  | 0,022399177 | 6,013027113  | coefficient |
| Profession | brain_disease_caregiver      | Very strong Strong | -1,842598443 | 0,02058476  | -89,51275043 | scale       |
| Profession | brain_disease_caregiver      | Strong Moderate    | 0,29516165   | 0,016067095 | 18,37056732  | scale       |
| Profession | brain_disease_caregiver      | Moderate Weak      | 2,350443062  | 0,023502949 | 100,0063059  | scale       |
| Profession | brain_disease_caregiver      | Weak No influence  | 3,934812761  | 0,044033978 | 89,35855816  | scale       |
| Profession | brain_research_participation | Yes                | 0,147961559  | 0,02255703  | 6,559443413  | coefficient |
| Profession | brain_research_participation | Very strong Strong | -1,84171399  | 0,020239786 | -90,99473614 | scale       |
| Profession | brain_research_participation | Strong Moderate    | 0,296359232  | 0,015626263 | 18,96545732  | scale       |
| Profession | brain_research_participation | Moderate Weak      | 2,352177656  | 0,023227123 | 101,268577   | scale       |
| Profession | brain_research_participation | Weak No influence  | 3,936651189  | 0,04388932  | 89,6949679   | scale       |

|    |            |                              |                    |              |             |                          |
|----|------------|------------------------------|--------------------|--------------|-------------|--------------------------|
| 1  |            |                              |                    |              |             |                          |
| 2  |            |                              |                    |              |             |                          |
| 3  |            |                              |                    |              |             |                          |
| 4  | Profession | cognitive_health             | Below average      | 0,242928544  | 0,047844986 | 5,07740861 coefficient   |
| 5  | Profession | cognitive_health             | Very strong Strong | -1,890567024 | 0,018138088 | -104,2318784 scale       |
| 6  | Profession | cognitive_health             | Strong Moderate    | 0,246198764  | 0,012469299 | 19,74439473 scale        |
| 7  | Profession | cognitive_health             | Moderate Weak      | 2,301377667  | 0,021089093 | 109,1264437 scale        |
| 8  | Profession | cognitive_health             | Weak No influence  | 3,886091773  | 0,042787764 | 90,82250137 scale        |
| 9  | Profession | education                    | Lower              | 0,302120055  | 0,024110814 | 12,5304793 coefficient   |
| 10 | Profession | education                    | Very strong Strong | -1,815876692 | 0,019212075 | -94,51746984 scale       |
| 11 | Profession | education                    | Strong Moderate    | 0,328031726  | 0,014404612 | 22,77268735 scale        |
| 12 | Profession | education                    | Moderate Weak      | 2,38809476   | 0,022507546 | 106,1019601 scale        |
| 13 | Profession | education                    | Weak No influence  | 3,973676566  | 0,043524616 | 91,29722182 scale        |
| 14 | Profession | gender                       | Man                | -0,138726741 | 0,024941417 | -5,562103409 coefficient |
| 15 | Profession | gender                       | Other/Undisclosed  | -0,001653337 | 0,169131588 | -0,009775447 coefficient |
| 16 | Profession | gender                       | Very strong Strong | -1,944368046 | 0,019465318 | -99,88883855 scale       |
| 17 | Profession | gender                       | Strong Moderate    | 0,193741376  | 0,014000753 | 13,83792576 scale        |
| 18 | Profession | gender                       | Moderate Weak      | 2,248955839  | 0,021882212 | 102,7755278 scale        |
| 19 | Profession | gender                       | Weak No influence  | 3,832771289  | 0,043175298 | 88,77231829 scale        |
| 20 | Profession | healthcare_experience        | Yes                | -0,221823603 | 0,022976998 | -9,654159312 coefficient |
| 21 | Profession | healthcare_experience        | Very strong Strong | -1,993635467 | 0,020337653 | -98,02682123 scale       |
| 22 | Profession | healthcare_experience        | Strong Moderate    | 0,146894354  | 0,015006362 | 9,788805079 scale        |
| 23 | Profession | healthcare_experience        | Moderate Weak      | 2,204641977  | 0,022420326 | 98,33228815 scale        |
| 24 | Profession | healthcare_experience        | Weak No influence  | 3,789792687  | 0,043420455 | 87,28127553 scale        |
| 25 | Profession | illness_experience           | Yes                | 0,049531686  | 0,022781539 | 2,174202867 coefficient  |
| 26 | Profession | illness_experience           | Very strong Strong | -1,88407163  | 0,020095413 | -93,75630353 scale       |
| 27 | Profession | illness_experience           | Strong Moderate    | 0,252049296  | 0,015219762 | 16,56065956 scale        |
| 28 | Profession | illness_experience           | Moderate Weak      | 2,306196155  | 0,022833121 | 101,0022324 scale        |
| 29 | Profession | illness_experience           | Weak No influence  | 3,890281114  | 0,04366951  | 89,08460745 scale        |
| 30 | Profession | mental_health                | Below average      | 0,10428863   | 0,033326225 | 3,129326194 coefficient  |
| 31 | Profession | mental_health                | Very strong Strong | -1,890731947 | 0,018425348 | -102,6158065 scale       |
| 32 | Profession | mental_health                | Strong Moderate    | 0,245589788  | 0,012892854 | 19,04851966 scale        |
| 33 | Profession | mental_health                | Moderate Weak      | 2,300190731  | 0,021349679 | 107,7388921 scale        |
| 34 | Profession | mental_health                | Weak No influence  | 3,884406287  | 0,042912382 | 90,51947393 scale        |
| 35 | Profession | relationship                 | Stable             | 0,045899111  | 0,022506125 | 2,039405312 coefficient  |
| 36 | Profession | relationship                 | Very strong Strong | -1,8781653   | 0,021887248 | -85,81093714 scale       |
| 37 | Profession | relationship                 | Strong Moderate    | 0,257950369  | 0,017549655 | 14,69831545 scale        |
| 38 | Profession | relationship                 | Moderate Weak      | 2,311928471  | 0,024426728 | 94,64748923 scale        |
| 39 | Profession | relationship                 | Weak No influence  | 3,895968678  | 0,044520735 | 87,50908288 scale        |
| 40 | Education  | age                          | 41-60              | 0,043430638  | 0,024358519 | 1,78297529 coefficient   |
| 41 | Education  | age                          | <= 40              | -0,228959612 | 0,03247789  | -7,049707157 coefficient |
| 42 | Education  | age                          | Very strong Strong | -1,568297636 | 0,019877125 | -78,89962065 scale       |
| 43 | Education  | age                          | Strong Moderate    | 0,41444551   | 0,017092442 | 24,2472971 scale         |
| 44 | Education  | age                          | Moderate Weak      | 2,400069208  | 0,025007987 | 95,97210894 scale        |
| 45 | Education  | age                          | Weak No influence  | 4,089533145  | 0,049252698 | 83,03165732 scale        |
| 46 | Education  | brain_disease_caregiver      | Yes                | 0,095444344  | 0,022282446 | 4,283387254 coefficient  |
| 47 | Education  | brain_disease_caregiver      | Very strong Strong | -1,501931859 | 0,018829181 | -79,76618233 scale       |
| 48 | Education  | brain_disease_caregiver      | Strong Moderate    | 0,477903816  | 0,016217386 | 29,4686101 scale         |
| 49 | Education  | brain_disease_caregiver      | Moderate Weak      | 2,462770812  | 0,024475181 | 100,6231907 scale        |
| 50 | Education  | brain_disease_caregiver      | Weak No influence  | 4,152073284  | 0,048984286 | 84,76337182 scale        |
| 51 | Education  | brain_research_participation | Yes                | 0,024633883  | 0,022433778 | 1,098071095 coefficient  |
| 52 | Education  | brain_research_participation | Very strong Strong | -1,535148243 | 0,018554687 | -82,73641443 scale       |
| 53 | Education  | brain_research_participation | Strong Moderate    | 0,443692567  | 0,015717888 | 28,22850991 scale        |
| 54 | Education  | brain_research_participation | Moderate Weak      | 2,428012702  | 0,024078343 | 100,838032 scale         |
| 55 | Education  | brain_research_participation | Weak No influence  | 4,117269444  | 0,048784743 | 84,39666112 scale        |
| 56 | Education  | cognitive_health             | Below average      | 0,412177178  | 0,047314103 | 8,711507845 coefficient  |
| 57 | Education  | cognitive_health             | Very strong Strong | -1,524255009 | 0,016031145 | -95,08085885 scale       |
| 58 | Education  | cognitive_health             | Strong Moderate    | 0,457790102  | 0,012693999 | 36,06350568 scale        |
| 59 | Education  | cognitive_health             | Moderate Weak      | 2,44546196   | 0,022286717 | 109,7273314 scale        |
| 60 | Education  | cognitive_health             | Weak No influence  | 4,136041999  | 0,047938429 | 86,2782133 scale         |
|    | Education  | education                    | Lower              | 0,491185691  | 0,024087222 | 20,39196059 coefficient  |
|    | Education  | education                    | Very strong Strong | -1,407809316 | 0,017146079 | -82,10678055 scale       |
|    | Education  | education                    | Strong Moderate    | 0,592718581  | 0,014747882 | 40,19008103 scale        |
|    | Education  | education                    | Moderate Weak      | 2,593713524  | 0,023872008 | 108,6508299 scale        |
|    | Education  | education                    | Weak No influence  | 4,286456989  | 0,048725748 | 87,97108714 scale        |
|    | Education  | gender                       | Man                | -0,097540195 | 0,024815368 | -3,930636666 coefficient |
|    | Education  | gender                       | Other/Undisclosed  | -0,148148766 | 0,1660881   | -0,891989047 coefficient |
|    | Education  | gender                       | Very strong Strong | -1,574591853 | 0,017457363 | -90,19643186 scale       |
|    | Education  | gender                       | Strong Moderate    | 0,405473194  | 0,014141966 | 28,67162761 scale        |
|    | Education  | gender                       | Moderate Weak      | 2,390293923  | 0,023003001 | 103,9122625 scale        |
|    | Education  | gender                       | Weak No influence  | 4,079277419  | 0,048268037 | 84,51301741 scale        |
|    | Education  | healthcare_experience        | Yes                | -0,300216645 | 0,02289113  | -13,11497729 coefficient |
|    | Education  | healthcare_experience        | Very strong Strong | -1,668893225 | 0,018565563 | -89,89187151 scale       |

|    |           |                              |                    |              |             |              |             |
|----|-----------|------------------------------|--------------------|--------------|-------------|--------------|-------------|
| 1  |           |                              |                    |              |             |              |             |
| 2  |           |                              |                    |              |             |              |             |
| 3  |           |                              |                    |              |             |              |             |
| 4  | Education | healthcare_experience        | Strong Moderate    | 0,318494131  | 0,015090669 | 21,10536825  | scale       |
| 5  | Education | healthcare_experience        | Moderate Weak      | 2,309268889  | 0,0234125   | 98,63401749  | scale       |
| 6  | Education | healthcare_experience        | Weak No influence  | 4,000507784  | 0,048427536 | 82,60812196  | scale       |
| 7  | Education | illness_experience           | Yes                | 0,100334904  | 0,022665179 | 4,426830449  | coefficient |
| 8  | Education | illness_experience           | Very strong Strong | -1,506102481 | 0,018172654 | -82,87740991 | scale       |
| 9  | Education | illness_experience           | Strong Moderate    | 0,473688795  | 0,015412235 | 30,73459498  | scale       |
| 10 | Education | illness_experience           | Moderate Weak      | 2,458643113  | 0,023945819 | 102,6752556  | scale       |
| 11 | Education | illness_experience           | Weak No influence  | 4,148064046  | 0,048726566 | 85,12941479  | scale       |
| 12 | Education | illness_experience           | Weak No influence  | 4,148064046  | 0,048726566 | 85,12941479  | scale       |
| 13 | Education | mental_health                | Below average      | 0,31665735   | 0,033119835 | 9,560957958  | coefficient |
| 14 | Education | mental_health                | Very strong Strong | -1,508215578 | 0,016305139 | -92,49940012 | scale       |
| 15 | Education | mental_health                | Strong Moderate    | 0,474810842  | 0,013132701 | 36,15485138  | scale       |
| 16 | Education | mental_health                | Moderate Weak      | 2,463647586  | 0,022598397 | 109,0186853  | scale       |
| 17 | Education | mental_health                | Moderate Weak      | 2,463647586  | 0,022598397 | 109,0186853  | scale       |
| 18 | Education | mental_health                | Weak No influence  | 4,15426391   | 0,04808877  | 86,38740235  | scale       |
| 19 | Education | relationship                 | Stable             | 0,00368163   | 0,022405307 | 0,164319556  | coefficient |
| 20 | Education | relationship                 | Stable             | 0,00368163   | 0,022405307 | 0,164319556  | coefficient |
| 21 | Education | relationship                 | Very strong Strong | -1,543687616 | 0,020247142 | -76,242246   | scale       |
| 22 | Education | relationship                 | Strong Moderate    | 0,435108385  | 0,017660097 | 24,63793907  | scale       |
| 23 | Education | relationship                 | Moderate Weak      | 2,419438371  | 0,025339676 | 95,48024148  | scale       |
| 24 | Education | relationship                 | Weak No influence  | 4,108665027  | 0,049410719 | 83,15331422  | scale       |
| 25 | Diet      | age                          | 41-60              | -0,424220432 | 0,024925913 | -17,01925361 | coefficient |
| 26 | Diet      | age                          | <= 40              | -0,532742665 | 0,032850705 | -16,21708448 | coefficient |
| 27 | Diet      | age                          | <= 40              | -0,532742665 | 0,032850705 | -16,21708448 | coefficient |
| 28 | Diet      | age                          | Very strong Strong | -1,448409138 | 0,019580468 | -73,97214185 | scale       |
| 29 | Diet      | age                          | Strong Moderate    | 0,687310739  | 0,017704313 | 38,8216551   | scale       |
| 30 | Diet      | age                          | Moderate Weak      | 2,844503609  | 0,031239308 | 91,05527054  | scale       |
| 31 | Diet      | age                          | Weak No influence  | 4,612759211  | 0,069125411 | 66,73029678  | scale       |
| 32 | Diet      | age                          | Weak No influence  | 4,612759211  | 0,069125411 | 66,73029678  | scale       |
| 33 | Diet      | brain_disease_caregiver      | Yes                | -0,157107604 | 0,022635133 | -6,940873854 | coefficient |
| 34 | Diet      | brain_disease_caregiver      | Very strong Strong | -1,262879142 | 0,017987658 | -70,20809006 | scale       |
| 35 | Diet      | brain_disease_caregiver      | Strong Moderate    | 0,850797719  | 0,016918362 | 50,28842043  | scale       |
| 36 | Diet      | brain_disease_caregiver      | Moderate Weak      | 2,997586146  | 0,0309959   | 96,70911728  | scale       |
| 37 | Diet      | brain_disease_caregiver      | Moderate Weak      | 2,997586146  | 0,0309959   | 96,70911728  | scale       |
| 38 | Diet      | brain_disease_caregiver      | Weak No influence  | 4,763649925  | 0,06902942  | 69,00898041  | scale       |
| 39 | Diet      | brain_research_participation | Yes                | -0,045320162 | 0,02277831  | -1,989619192 | coefficient |
| 40 | Diet      | brain_research_participation | Yes                | -0,045320162 | 0,02277831  | -1,989619192 | coefficient |
| 41 | Diet      | brain_research_participation | Very strong Strong | -1,207561393 | 0,01740288  | -69,38859533 | scale       |
| 42 | Diet      | brain_research_participation | Strong Moderate    | 0,903632582  | 0,016579743 | 54,5022069   | scale       |
| 43 | Diet      | brain_research_participation | Moderate Weak      | 3,048843149  | 0,030891547 | 98,69506304  | scale       |
| 44 | Diet      | brain_research_participation | Weak No influence  | 4,81445788   | 0,068991379 | 69,78347083  | scale       |
| 45 | Diet      | brain_research_participation | Weak No influence  | 4,81445788   | 0,068991379 | 69,78347083  | scale       |
| 46 | Diet      | cognitive_health             | Below average      | 0,389976224  | 0,048370207 | 8,062322899  | coefficient |
| 47 | Diet      | cognitive_health             | Very strong Strong | -1,167483025 | 0,014495045 | -80,54359187 | scale       |
| 48 | Diet      | cognitive_health             | Strong Moderate    | 0,946962305  | 0,013759284 | 68,82351473  | scale       |
| 49 | Diet      | cognitive_health             | Moderate Weak      | 3,095230337  | 0,029565395 | 104,6909846  | scale       |
| 50 | Diet      | cognitive_health             | Weak No influence  | 4,861721625  | 0,068418604 | 71,05847407  | scale       |
| 51 | Diet      | education                    | Lower              | 0,240048484  | 0,024408715 | 9,834540042  | coefficient |
| 52 | Diet      | education                    | Very strong Strong | -1,116325768 | 0,015972728 | -69,88948854 | scale       |
| 53 | Diet      | education                    | Strong Moderate    | 0,999994263  | 0,015599897 | 64,10262071  | scale       |
| 54 | Diet      | education                    | Moderate Weak      | 3,148193837  | 0,030521281 | 103,1474993  | scale       |
| 55 | Diet      | education                    | Moderate Weak      | 3,148193837  | 0,030521281 | 103,1474993  | scale       |
| 56 | Diet      | education                    | Weak No influence  | 4,914813944  | 0,06884423  | 71,39035397  | scale       |
| 57 | Diet      | gender                       | Man                | 0,304555832  | 0,025232797 | 12,06984033  | coefficient |
| 58 | Diet      | gender                       | Other/Undisclosed  | -0,100613677 | 0,168812613 | -0,596008052 | coefficient |
| 59 | Diet      | gender                       | Very strong Strong | -1,108332146 | 0,015723979 | -70,48674736 | scale       |
| 60 | Diet      | gender                       | Strong Moderate    | 1,011097211  | 0,015409943 | 65,6132999   | scale       |
|    | Diet      | gender                       | Moderate Weak      | 3,162274393  | 0,030480073 | 103,7489124  | scale       |
|    | Diet      | gender                       | Weak No influence  | 4,929290987  | 0,068827613 | 71,61792749  | scale       |
|    | Diet      | healthcare_experience        | Yes                | -0,331764246 | 0,023292877 | -14,24316335 | coefficient |
|    | Diet      | healthcare_experience        | Very strong Strong | -1,322779512 | 0,017297338 | -76,47301121 | scale       |
|    | Diet      | healthcare_experience        | Strong Moderate    | 0,800607164  | 0,015835905 | 50,55645023  | scale       |
|    | Diet      | healthcare_experience        | Moderate Weak      | 2,951705035  | 0,030375451 | 97,17403216  | scale       |
|    | Diet      | healthcare_experience        | Weak No influence  | 4,718347717  | 0,068754272 | 68,62624838  | scale       |
|    | Diet      | illness_experience           | Yes                | 0,097189181  | 0,023024691 | 4,221085104  | coefficient |
|    | Diet      | illness_experience           | Very strong Strong | -1,149510853 | 0,016898129 | -68,02592411 | scale       |
|    | Diet      | illness_experience           | Strong Moderate    | 0,962515862  | 0,016373446 | 58,78517413  | scale       |
|    | Diet      | illness_experience           | Moderate Weak      | 3,108282635  | 0,03087202  | 100,6828382  | scale       |
|    | Diet      | illness_experience           | Weak No influence  | 4,873982761  | 0,068989902 | 70,6477709   | scale       |
|    | Diet      | illness_experience           | Weak No influence  | 4,873982761  | 0,068989902 | 70,6477709   | scale       |
|    | Diet      | mental_health                | Below average      | 0,199026331  | 0,033561138 | 5,930261742  | coefficient |
|    | Diet      | mental_health                | Very strong Strong | -1,163285466 | 0,01485615  | -78,30329247 | scale       |
|    | Diet      | mental_health                | Strong Moderate    | 0,949787565  | 0,014169507 | 67,03039065  | scale       |
|    | Diet      | mental_health                | Moderate Weak      | 3,096484099  | 0,02975301  | 104,0729701  | scale       |
|    | Diet      | mental_health                | Weak No influence  | 4,862349961  | 0,068495982 | 70,98737454  | scale       |
|    | Diet      | relationship                 | Stable             | 0,067686375  | 0,022739883 | 2,976548983  | coefficient |
|    | Diet      | relationship                 | Very strong Strong | -1,150207788 | 0,019053424 | -60,36751281 | scale       |
|    | Diet      | relationship                 | Strong Moderate    | 0,961329062  | 0,018593905 | 51,70130045  | scale       |
|    | Diet      | relationship                 | Moderate Weak      | 3,106541552  | 0,032075196 | 96,85183418  | scale       |
|    | Diet      | relationship                 | Weak No influence  | 4,872121519  | 0,069532689 | 70,06951118  | scale       |

|    |                      |                              |                    |              |             |              |             |
|----|----------------------|------------------------------|--------------------|--------------|-------------|--------------|-------------|
| 1  |                      |                              |                    |              |             |              |             |
| 2  |                      |                              |                    |              |             |              |             |
| 3  |                      |                              |                    |              |             |              |             |
| 4  | Physical environment | age                          | 41-60              | -0,20208856  | 0,024637246 | -8,202562823 | coefficient |
| 5  | Physical environment | age                          | <= 40              | -0,129361082 | 0,03244561  | -3,987013431 | coefficient |
| 6  | Physical environment | age                          | Very strong Strong | -1,168086671 | 0,018660174 | -62,59784605 | scale       |
| 7  | Physical environment | age                          | Strong Moderate    | 0,840616621  | 0,017900141 | 46,96145365  | scale       |
| 8  | Physical environment | age                          | Moderate Weak      | 3,061489638  | 0,032586133 | 93,95068966  | scale       |
| 9  | Physical environment | age                          | Weak No influence  | 5,478432053  | 0,098909322 | 55,38843007  | scale       |
| 10 | Physical environment | brain_disease_caregiver      | Yes                | -0,037876106 | 0,022475424 | -1,685223193 | coefficient |
| 11 | Physical environment | brain_disease_caregiver      | Very strong Strong | -1,086403575 | 0,017393243 | -62,46124169 | scale       |
| 12 | Physical environment | brain_disease_caregiver      | Strong Moderate    | 0,918584822  | 0,016980637 | 54,09601722  | scale       |
| 13 | Physical environment | brain_disease_caregiver      | Moderate Weak      | 3,137375485  | 0,032185748 | 97,47716619  | scale       |
| 14 | Physical environment | brain_disease_caregiver      | Weak No influence  | 5,553859032  | 0,098783665 | 56,22244334  | scale       |
| 15 | Physical environment | brain_research_participation | Yes                | -0,017081919 | 0,02262773  | -0,754910888 | coefficient |
| 16 | Physical environment | brain_research_participation | Very strong Strong | -1,076096335 | 0,016969801 | -63,41243138 | scale       |
| 17 | Physical environment | brain_research_participation | Strong Moderate    | 0,928774251  | 0,016596105 | 55,96338637  | scale       |
| 18 | Physical environment | brain_research_participation | Moderate Weak      | 3,14749399   | 0,031997593 | 98,36658532  | scale       |
| 19 | Physical environment | brain_research_participation | Weak No influence  | 5,563951492  | 0,098723788 | 56,35877257  | scale       |
| 20 | Physical environment | cognitive_health             | Below average      | 0,185083146  | 0,048147914 | 3,844053262  | coefficient |
| 21 | Physical environment | cognitive_health             | Very strong Strong | -1,058411201 | 0,014088858 | -75,12398849 | scale       |
| 22 | Physical environment | cognitive_health             | Strong Moderate    | 0,947044102  | 0,013731194 | 68,97026353  | scale       |
| 23 | Physical environment | cognitive_health             | Moderate Weak      | 3,166449078  | 0,030645361 | 103,3255593  | scale       |
| 24 | Physical environment | cognitive_health             | Weak No influence  | 5,583278804  | 0,098298426 | 56,79926957  | scale       |
| 25 | Physical environment | education                    | Lower              | -0,055145049 | 0,024203428 | -2,278398299 | coefficient |
| 26 | Physical environment | education                    | Very strong Strong | -1,086079492 | 0,015823495 | -68,63714348 | scale       |
| 27 | Physical environment | education                    | Strong Moderate    | 0,919116416  | 0,015349458 | 59,87940593  | scale       |
| 28 | Physical environment | education                    | Moderate Weak      | 3,13799215   | 0,031357357 | 100,0719587  | scale       |
| 29 | Physical environment | education                    | Weak No influence  | 5,55439925   | 0,098520332 | 56,37820252  | scale       |
| 30 | Physical environment | gender                       | Man                | 0,159827846  | 0,024937236 | 6,409204413  | coefficient |
| 31 | Physical environment | gender                       | Other/Undisclosed  | -0,289375149 | 0,168476721 | -1,717597231 | coefficient |
| 32 | Physical environment | gender                       | Very strong Strong | -1,026167625 | 0,015451171 | -66,41358489 | scale       |
| 33 | Physical environment | gender                       | Strong Moderate    | 0,981024769  | 0,01530173  | 64,11201497  | scale       |
| 34 | Physical environment | gender                       | Moderate Weak      | 3,201145017  | 0,031424798 | 101,8668459  | scale       |
| 35 | Physical environment | gender                       | Weak No influence  | 5,618145345  | 0,098549304 | 57,00847305  | scale       |
| 36 | Physical environment | healthcare_experience        | Yes                | -0,18822937  | 0,023075385 | -8,157149543 | coefficient |
| 37 | Physical environment | healthcare_experience        | Very strong Strong | -1,143202818 | 0,016654471 | -68,64239716 | scale       |
| 38 | Physical environment | healthcare_experience        | Strong Moderate    | 0,865432949  | 0,015925497 | 54,34260116  | scale       |
| 39 | Physical environment | healthcare_experience        | Moderate Weak      | 3,085975235  | 0,031583401 | 97,70876953  | scale       |
| 40 | Physical environment | healthcare_experience        | Weak No influence  | 5,502804661  | 0,098586813 | 55,81684315  | scale       |
| 41 | Physical environment | illness_experience           | Yes                | -0,134103939 | 0,022885588 | -5,859755004 | coefficient |
| 42 | Physical environment | illness_experience           | Very strong Strong | -1,123726128 | 0,016776645 | -66,98157444 | scale       |
| 43 | Physical environment | illness_experience           | Strong Moderate    | 0,883231229  | 0,016136629 | 54,73455679  | scale       |
| 44 | Physical environment | illness_experience           | Moderate Weak      | 3,102943881  | 0,031707298 | 97,86213644  | scale       |
| 45 | Physical environment | illness_experience           | Weak No influence  | 5,519429678  | 0,098630039 | 55,96093977  | scale       |
| 46 | Physical environment | mental_health                | Below average      | 0,068382323  | 0,033288214 | 2,054250268  | coefficient |
| 47 | Physical environment | mental_health                | Very strong Strong | -1,059901932 | 0,014479922 | -73,1980422  | scale       |
| 48 | Physical environment | mental_health                | Strong Moderate    | 0,945153824  | 0,014129991 | 66,88990865  | scale       |
| 49 | Physical environment | mental_health                | Moderate Weak      | 3,164018688  | 0,03081903  | 102,664448   | scale       |
| 50 | Physical environment | mental_health                | Weak No influence  | 5,580514275  | 0,098350288 | 56,74120921  | scale       |
| 51 | Physical environment | relationship                 | Stable             | 0,083726224  | 0,022592727 | 3,705892839  | coefficient |
| 52 | Physical environment | relationship                 | Very strong Strong | -1,022214455 | 0,018645574 | -54,8234379  | scale       |
| 53 | Physical environment | relationship                 | Strong Moderate    | 0,983421042  | 0,018554144 | 53,00276972  | scale       |
| 54 | Physical environment | relationship                 | Moderate Weak      | 3,202440429  | 0,03311623  | 96,70304866  | scale       |
| 55 | Physical environment | relationship                 | Weak No influence  | 5,618948815  | 0,099095896 | 56,70213441  | scale       |
| 56 | Life goals           | age                          | 41-60              | -0,02164673  | 0,024548045 | -0,88181075  | coefficient |
| 57 | Life goals           | age                          | <= 40              | 0,173406461  | 0,032622041 | 5,315622632  | coefficient |
| 58 | Life goals           | age                          | Very strong Strong | -1,006819433 | 0,018083759 | -55,67534084 | scale       |
| 59 | Life goals           | age                          | Strong Moderate    | 1,002994453  | 0,018058955 | 55,54000438  | scale       |
| 60 | Life goals           | age                          | Moderate Weak      | 2,92358164   | 0,02975377  | 98,25920038  | scale       |
|    | Life goals           | age                          | Weak No influence  | 4,628685067  | 0,062156349 | 74,4684193   | scale       |
|    | Life goals           | brain_disease_caregiver      | Yes                | 0,032584162  | 0,02244025  | 1,452040972  | coefficient |
|    | Life goals           | brain_disease_caregiver      | Very strong Strong | -1,009821161 | 0,017159594 | -58,84878002 | scale       |
|    | Life goals           | brain_disease_caregiver      | Strong Moderate    | 0,998190315  | 0,017124157 | 58,29135601  | scale       |
|    | Life goals           | brain_disease_caregiver      | Moderate Weak      | 2,916745615  | 0,029116431 | 100,175245   | scale       |
|    | Life goals           | brain_disease_caregiver      | Weak No influence  | 4,621348108  | 0,061844512 | 74,72527449  | scale       |
|    | Life goals           | brain_research_participation | Yes                | 0,149079742  | 0,022598701 | 6,596827834  | coefficient |
|    | Life goals           | brain_research_participation | Very strong Strong | -0,961608647 | 0,016663047 | -57,70905191 | scale       |
|    | Life goals           | brain_research_participation | Strong Moderate    | 1,048918387  | 0,016895564 | 62,08247429  | scale       |
|    | Life goals           | brain_research_participation | Moderate Weak      | 2,968537912  | 0,029042339 | 102,2141481  | scale       |
|    | Life goals           | brain_research_participation | Weak No influence  | 4,673247879  | 0,061811213 | 75,60517974  | scale       |
|    | Life goals           | cognitive_health             | Below average      | 0,097419794  | 0,047405341 | 2,055038369  | coefficient |
|    | Life goals           | cognitive_health             | Very strong Strong | -1,019188102 | 0,013950671 | -73,05656528 | scale       |

|    |                    |                              |                    |              |             |              |             |
|----|--------------------|------------------------------|--------------------|--------------|-------------|--------------|-------------|
| 1  |                    |                              |                    |              |             |              |             |
| 2  |                    |                              |                    |              |             |              |             |
| 3  |                    |                              |                    |              |             |              |             |
| 4  | Life goals         | cognitive_health             | Strong Moderate    | 0,988859403  | 0,013849597 | 71,39986668  | scale       |
| 5  | Life goals         | cognitive_health             | Moderate Weak      | 2,907474363  | 0,027303127 | 106,488695   | scale       |
| 6  | Life goals         | cognitive_health             | Weak No influence  | 4,612161943  | 0,061011007 | 75,59557169  | scale       |
| 7  | Life goals         | education                    | Lower              | 0,078616372  | 0,024093143 | 3,263018503  | coefficient |
| 8  | Life goals         | education                    | Very strong Strong | -1,000465884 | 0,015574191 | -64,23870847 | scale       |
| 9  | Life goals         | education                    | Strong Moderate    | 1,008081263  | 0,015600063 | 64,62033077  | scale       |
| 10 | Life goals         | education                    | Moderate Weak      | 2,926743362  | 0,028245823 | 103,6168546  | scale       |
| 11 | Life goals         | education                    | Weak No influence  | 4,631332408  | 0,061436872 | 75,38359767  | scale       |
| 12 | Life goals         | education                    | Weak No influence  | 4,631332408  | 0,061436872 | 75,38359767  | scale       |
| 13 | Life goals         | gender                       | Man                | 0,1330352    | 0,024876539 | 5,347817979  | coefficient |
| 14 | Life goals         | gender                       | Other/Undisclosed  | -0,05995092  | 0,172142888 | -0,348262545 | coefficient |
| 15 | Life goals         | gender                       | Very strong Strong | -0,988301835 | 0,01532337  | -64,49637728 | scale       |
| 16 | Life goals         | gender                       | Strong Moderate    | 1,021021527  | 0,015389509 | 66,34529475  | scale       |
| 17 | Life goals         | gender                       | Moderate Weak      | 2,940297554  | 0,02816117  | 104,4096383  | scale       |
| 18 | Life goals         | gender                       | Weak No influence  | 4,645302486  | 0,061408575 | 75,64582776  | scale       |
| 19 | Life goals         | gender                       | Weak No influence  | 4,645302486  | 0,061408575 | 75,64582776  | scale       |
| 20 | Life goals         | healthcare_experience        | Yes                | -0,242652405 | 0,023046119 | -10,52899219 | coefficient |
| 21 | Life goals         | healthcare_experience        | Very strong Strong | -1,121918424 | 0,016586902 | -67,63881625 | scale       |
| 22 | Life goals         | healthcare_experience        | Strong Moderate    | 0,892258063  | 0,015987409 | 55,81004787  | scale       |
| 23 | Life goals         | healthcare_experience        | Moderate Weak      | 2,813674929  | 0,028329755 | 99,31871676  | scale       |
| 24 | Life goals         | healthcare_experience        | Moderate Weak      | 2,813674929  | 0,028329755 | 99,31871676  | scale       |
| 25 | Life goals         | healthcare_experience        | Weak No influence  | 4,518989379  | 0,061463452 | 73,52319573  | scale       |
| 26 | Life goals         | healthcare_experience        | Weak No influence  | 4,518989379  | 0,061463452 | 73,52319573  | scale       |
| 27 | Life goals         | illness_experience           | Yes                | -0,039681728 | 0,022833005 | -1,737910871 | coefficient |
| 28 | Life goals         | illness_experience           | Very strong Strong | -1,040940293 | 0,01651945  | -63,01301005 | scale       |
| 29 | Life goals         | illness_experience           | Strong Moderate    | 0,967194152  | 0,016307947 | 59,30814957  | scale       |
| 30 | Life goals         | illness_experience           | Moderate Weak      | 2,885743322  | 0,028603138 | 100,8890454  | scale       |
| 31 | Life goals         | illness_experience           | Moderate Weak      | 2,885743322  | 0,028603138 | 100,8890454  | scale       |
| 32 | Life goals         | illness_experience           | Weak No influence  | 4,590279671  | 0,06160395  | 74,51274907  | scale       |
| 33 | Life goals         | illness_experience           | Weak No influence  | 4,590279671  | 0,06160395  | 74,51274907  | scale       |
| 34 | Life goals         | mental_health                | Below average      | 0,105292465  | 0,03373255  | 3,121390593  | coefficient |
| 35 | Life goals         | mental_health                | Very strong Strong | -1,011872276 | 0,014291318 | -70,8032844  | scale       |
| 36 | Life goals         | mental_health                | Strong Moderate    | 0,996410212  | 0,0142265   | 70,0390244   | scale       |
| 37 | Life goals         | mental_health                | Moderate Weak      | 2,915592532  | 0,027530601 | 105,9037008  | scale       |
| 38 | Life goals         | mental_health                | Weak No influence  | 4,620463801  | 0,061118175 | 75,59885081  | scale       |
| 39 | Life goals         | mental_health                | Weak No influence  | 4,620463801  | 0,061118175 | 75,59885081  | scale       |
| 40 | Life goals         | relationship                 | Stable             | 0,035361139  | 0,022565561 | 1,567040102  | coefficient |
| 41 | Life goals         | relationship                 | Very strong Strong | -1,00506089  | 0,01862188  | -53,97204172 | scale       |
| 42 | Life goals         | relationship                 | Strong Moderate    | 1,003017108  | 0,018630181 | 53,83829113  | scale       |
| 43 | Life goals         | relationship                 | Moderate Weak      | 2,921446735  | 0,030001971 | 97,37515948  | scale       |
| 44 | Life goals         | relationship                 | Weak No influence  | 4,625981442  | 0,062259178 | 74,30200026  | scale       |
| 45 | Social environment | age                          | 41-60              | -0,31294242  | 0,025065138 | -12,48516634 | coefficient |
| 46 | Social environment | age                          | <= 40              | -0,686940348 | 0,033341981 | -20,60286535 | coefficient |
| 47 | Social environment | age                          | Very strong Strong | -0,865259315 | 0,018097999 | -47,80966652 | scale       |
| 48 | Social environment | age                          | Strong Moderate    | 1,356841073  | 0,019514561 | 69,52967485  | scale       |
| 49 | Social environment | age                          | Moderate Weak      | 3,534048468  | 0,041437334 | 85,28657826  | scale       |
| 50 | Social environment | age                          | Moderate Weak      | 3,534048468  | 0,041437334 | 85,28657826  | scale       |
| 51 | Social environment | age                          | Weak No influence  | 5,539899585  | 0,107311682 | 51,62438486  | scale       |
| 52 | Social environment | age                          | Weak No influence  | 5,539899585  | 0,107311682 | 51,62438486  | scale       |
| 53 | Social environment | brain_disease_caregiver      | Yes                | -0,022633637 | 0,022790336 | -0,993124337 | coefficient |
| 54 | Social environment | brain_disease_caregiver      | Very strong Strong | -0,639176951 | 0,016547721 | -38,62628393 | scale       |
| 55 | Social environment | brain_disease_caregiver      | Strong Moderate    | 1,55537103   | 0,019135872 | 81,28038368  | scale       |
| 56 | Social environment | brain_disease_caregiver      | Moderate Weak      | 3,7260428    | 0,041356881 | 90,09486961  | scale       |
| 57 | Social environment | brain_disease_caregiver      | Moderate Weak      | 3,7260428    | 0,041356881 | 90,09486961  | scale       |
| 58 | Social environment | brain_disease_caregiver      | Weak No influence  | 5,730546177  | 0,10728727  | 53,41310487  | scale       |
| 59 | Social environment | brain_research_participation | Yes                | 0,10250351   | 0,022949792 | 4,46642432   | coefficient |
| 60 | Social environment | brain_research_participation | Very strong Strong | -0,584589476 | 0,016024824 | -36,48024357 | scale       |
|    | Social environment | brain_research_participation | Strong Moderate    | 1,611114911  | 0,01894886  | 85,02437292  | scale       |
|    | Social environment | brain_research_participation | Moderate Weak      | 3,782008663  | 0,04130679  | 91,55900705  | scale       |
|    | Social environment | brain_research_participation | Weak No influence  | 5,786553094  | 0,107270503 | 53,94356239  | scale       |
|    | Social environment | brain_research_participation | Weak No influence  | 5,786553094  | 0,107270503 | 53,94356239  | scale       |
|    | Social environment | cognitive_health             | Below average      | 0,280827243  | 0,048496157 | 5,790711262  | coefficient |
|    | Social environment | cognitive_health             | Very strong Strong | -0,612919612 | 0,012942801 | -47,35602547 | scale       |
|    | Social environment | cognitive_health             | Strong Moderate    | 1,583576831  | 0,01627395  | 97,30746672  | scale       |
|    | Social environment | cognitive_health             | Moderate Weak      | 3,75543852   | 0,040149437 | 93,53651723  | scale       |
|    | Social environment | cognitive_health             | Moderate Weak      | 3,75543852   | 0,040149437 | 93,53651723  | scale       |
|    | Social environment | cognitive_health             | Weak No influence  | 5,760237636  | 0,106831584 | 53,91886369  | scale       |
|    | Social environment | education                    | Lower              | 0,144146146  | 0,024548688 | 5,871847341  | coefficient |
|    | Social environment | education                    | Very strong Strong | -0,584331524 | 0,014714602 | -39,71099849 | scale       |
|    | Social environment | education                    | Strong Moderate    | 1,612267313  | 0,017862016 | 90,26233899  | scale       |
|    | Social environment | education                    | Moderate Weak      | 3,783764209  | 0,040833894 | 92,66234117  | scale       |
|    | Social environment | education                    | Weak No influence  | 5,788412671  | 0,10709062  | 54,0515376   | scale       |
|    | Social environment | education                    | Weak No influence  | 5,788412671  | 0,10709062  | 54,0515376   | scale       |
|    | Social environment | gender                       | Man                | 0,264548621  | 0,025344848 | 10,43796445  | coefficient |
|    | Social environment | gender                       | Other/Undisclosed  | -0,494459156 | 0,171488452 | -2,883337916 | coefficient |
|    | Social environment | gender                       | Very strong Strong | -0,558867734 | 0,014438712 | -38,70620497 | scale       |
|    | Social environment | gender                       | Strong Moderate    | 1,643030648  | 0,017793935 | 92,33655539  | scale       |
|    | Social environment | gender                       | Moderate Weak      | 3,816672265  | 0,040835651 | 93,46421908  | scale       |
|    | Social environment | gender                       | Weak No influence  | 5,821686773  | 0,107092899 | 54,36109031  | scale       |
|    | Social environment | healthcare_experience        | Yes                | -0,330811103 | 0,023440848 | -14,11258779 | coefficient |
|    | Social environment | healthcare_experience        | Very strong Strong | -0,760883933 | 0,015854381 | -47,99202936 | scale       |
|    | Social environment | healthcare_experience        | Strong Moderate    | 1,445701947  | 0,017967409 | 80,46245912  | scale       |
|    | Social environment | healthcare_experience        | Moderate Weak      | 3,620578543  | 0,040767389 | 88,81065464  | scale       |

|    |                    |                              |                    |              |             |              |             |
|----|--------------------|------------------------------|--------------------|--------------|-------------|--------------|-------------|
| 1  |                    |                              |                    |              |             |              |             |
| 2  |                    |                              |                    |              |             |              |             |
| 3  |                    |                              |                    |              |             |              |             |
| 4  | Social environment | healthcare_experience        | Weak No influence  | 5,625808874  | 0,107058632 | 52,54885833  | scale       |
| 5  | Social environment | illness_experience           | Yes                | 0,036033322  | 0,023180676 | 1,554455186  | coefficient |
| 6  | Social environment | illness_experience           | Very strong Strong | -0,614147155 | 0,015707127 | -39,09990292 | scale       |
| 7  | Social environment | illness_experience           | Strong Moderate    | 1,580497875  | 0,01853093  | 85,28972143  | scale       |
| 8  | Social environment | illness_experience           | Moderate Weak      | 3,751148131  | 0,041104331 | 91,2591945   | scale       |
| 9  | Social environment | illness_experience           | Weak No influence  | 5,755655696  | 0,107192583 | 53,69453293  | scale       |
| 10 | Social environment | mental_health                | Below average      | -0,116348852 | 0,033861346 | -3,436037442 | coefficient |
| 11 | Social environment | mental_health                | Very strong Strong | -0,643954139 | 0,013439147 | -47,91629688 | scale       |
| 12 | Social environment | mental_health                | Strong Moderate    | 1,551274858  | 0,016492223 | 94,06099022  | scale       |
| 13 | Social environment | mental_health                | Moderate Weak      | 3,72199721   | 0,040212355 | 92,55854805  | scale       |
| 14 | Social environment | mental_health                | Weak No influence  | 5,726496904  | 0,106853541 | 53,59201804  | scale       |
| 15 | Social environment | relationship                 | Stable             | 0,119845071  | 0,022931919 | 5,226124906  | coefficient |
| 16 | Social environment | relationship                 | Very strong Strong | -0,561723787 | 0,017975941 | -31,24864365 | scale       |
| 17 | Social environment | relationship                 | Strong Moderate    | 1,634374718  | 0,020717297 | 78,88938164  | scale       |
| 18 | Social environment | relationship                 | Moderate Weak      | 3,805090658  | 0,042142023 | 90,29207406  | scale       |
| 19 | Social environment | relationship                 | Weak No influence  | 5,809687598  | 0,107596399 | 53,99518628  | scale       |
| 20 | Social environment | relationship                 | Weak No influence  | 5,809687598  | 0,107596399 | 53,99518628  | scale       |
| 21 | Social environment | relationship                 | Weak No influence  | 5,809687598  | 0,107596399 | 53,99518628  | scale       |
| 22 | Social environment | relationship                 | Weak No influence  | 5,809687598  | 0,107596399 | 53,99518628  | scale       |
| 23 | Sleeping habits    | age                          | 41-60              | -0,741074555 | 0,025723084 | -28,80970916 | coefficient |
| 24 | Sleeping habits    | age                          | <= 40              | -1,14350433  | 0,034228345 | -33,4081104  | coefficient |
| 25 | Sleeping habits    | age                          | Very strong Strong | -1,072547519 | 0,01888711  | -56,78727595 | scale       |
| 26 | Sleeping habits    | age                          | Strong Moderate    | 1,346093343  | 0,019818726 | 67,92027545  | scale       |
| 27 | Sleeping habits    | age                          | Moderate Weak      | 3,691193653  | 0,047731687 | 77,33214293  | scale       |
| 28 | Sleeping habits    | age                          | Weak No influence  | 5,443024689  | 0,11100015  | 49,03619212  | scale       |
| 29 | Sleeping habits    | age                          | Weak No influence  | 5,443024689  | 0,11100015  | 49,03619212  | scale       |
| 30 | Sleeping habits    | brain_disease_caregiver      | Yes                | 0,10174138   | 0,022963321 | 4,430603881  | coefficient |
| 31 | Sleeping habits    | brain_disease_caregiver      | Very strong Strong | -0,534333708 | 0,016454055 | -32,47428705 | scale       |
| 32 | Sleeping habits    | brain_disease_caregiver      | Strong Moderate    | 1,787811355  | 0,020210412 | 88,45991765  | scale       |
| 33 | Sleeping habits    | brain_disease_caregiver      | Moderate Weak      | 4,110663468  | 0,048073667 | 85,50759163  | scale       |
| 34 | Sleeping habits    | brain_disease_caregiver      | Weak No influence  | 5,860028316  | 0,111153182 | 52,72029303  | scale       |
| 35 | Sleeping habits    | brain_disease_caregiver      | Weak No influence  | 5,860028316  | 0,111153182 | 52,72029303  | scale       |
| 36 | Sleeping habits    | brain_research_participation | Yes                | 0,323542578  | 0,023216115 | 13,93612031  | coefficient |
| 37 | Sleeping habits    | brain_research_participation | Very strong Strong | -0,445566414 | 0,015862848 | -28,08867633 | scale       |
| 38 | Sleeping habits    | brain_research_participation | Strong Moderate    | 1,888253236  | 0,02021325  | 93,41660505  | scale       |
| 39 | Sleeping habits    | brain_research_participation | Moderate Weak      | 4,214514336  | 0,048137952 | 87,55076117  | scale       |
| 40 | Sleeping habits    | brain_research_participation | Weak No influence  | 5,963947291  | 0,111179226 | 53,64264089  | scale       |
| 41 | Sleeping habits    | brain_research_participation | Weak No influence  | 5,963947291  | 0,111179226 | 53,64264089  | scale       |
| 42 | Sleeping habits    | cognitive_health             | Below average      | -0,125495345 | 0,048984986 | -2,561914463 | coefficient |
| 43 | Sleeping habits    | cognitive_health             | Very strong Strong | -0,588915411 | 0,01291484  | -45,5998986  | scale       |
| 44 | Sleeping habits    | cognitive_health             | Strong Moderate    | 1,732383543  | 0,017131136 | 101,1248486  | scale       |
| 45 | Sleeping habits    | cognitive_health             | Moderate Weak      | 4,054966023  | 0,046848026 | 86,5557503   | scale       |
| 46 | Sleeping habits    | cognitive_health             | Weak No influence  | 5,804305291  | 0,110629977 | 52,46593584  | scale       |
| 47 | Sleeping habits    | cognitive_health             | Weak No influence  | 5,804305291  | 0,110629977 | 52,46593584  | scale       |
| 48 | Sleeping habits    | education                    | Lower              | 0,154439169  | 0,024734088 | 6,243980769  | coefficient |
| 49 | Sleeping habits    | education                    | Very strong Strong | -0,534005503 | 0,014674471 | -36,39010329 | scale       |
| 50 | Sleeping habits    | education                    | Strong Moderate    | 1,789214504  | 0,018782096 | 95,26170705  | scale       |
| 51 | Sleeping habits    | education                    | Moderate Weak      | 4,112673817  | 0,04750411  | 86,57511489  | scale       |
| 52 | Sleeping habits    | education                    | Weak No influence  | 5,862304334  | 0,110912003 | 52,85545444  | scale       |
| 53 | Sleeping habits    | education                    | Weak No influence  | 5,862304334  | 0,110912003 | 52,85545444  | scale       |
| 54 | Sleeping habits    | gender                       | Man                | 0,318229155  | 0,025581976 | 12,4395847   | coefficient |
| 55 | Sleeping habits    | gender                       | Other/Undisclosed  | -0,144050474 | 0,170305814 | -0,845834154 | coefficient |
| 56 | Sleeping habits    | gender                       | Other/Undisclosed  | -0,144050474 | 0,170305814 | -0,845834154 | coefficient |
| 57 | Sleeping habits    | gender                       | Very strong Strong | -0,495779864 | 0,014370498 | -34,49983961 | scale       |
| 58 | Sleeping habits    | gender                       | Strong Moderate    | 1,835284373  | 0,018793101 | 97,65734571  | scale       |
| 59 | Sleeping habits    | gender                       | Moderate Weak      | 4,161711535  | 0,047547726 | 87,52703686  | scale       |
| 60 | Sleeping habits    | gender                       | Weak No influence  | 5,911690288  | 0,110931731 | 53,29124709  | scale       |
|    | Sleeping habits    | healthcare_experience        | Yes                | -0,272223147 | 0,023586203 | -11,54162653 | coefficient |
|    | Sleeping habits    | healthcare_experience        | Very strong Strong | -0,689233033 | 0,015742441 | -43,78184064 | scale       |
|    | Sleeping habits    | healthcare_experience        | Strong Moderate    | 1,639968992  | 0,018883913 | 86,84476314  | scale       |
|    | Sleeping habits    | healthcare_experience        | Moderate Weak      | 3,965086397  | 0,047470535 | 83,52731648  | scale       |
|    | Sleeping habits    | healthcare_experience        | Weak No influence  | 5,714912168  | 0,110892934 | 51,53540427  | scale       |
|    | Sleeping habits    | illness_experience           | Yes                | -0,109249849 | 0,023357843 | -4,677223422 | coefficient |
|    | Sleeping habits    | illness_experience           | Very strong Strong | -0,62597633  | 0,015800984 | -39,61628893 | scale       |
|    | Sleeping habits    | illness_experience           | Strong Moderate    | 1,696356112  | 0,019210771 | 88,30234586  | scale       |
|    | Sleeping habits    | illness_experience           | Moderate Weak      | 4,019515004  | 0,047625832 | 84,39779127  | scale       |
|    | Sleeping habits    | illness_experience           | Weak No influence  | 5,768900397  | 0,110962786 | 51,98950582  | scale       |
|    | Sleeping habits    | mental_health                | Below average      | -0,330331067 | 0,034108518 | -9,684708766 | coefficient |
|    | Sleeping habits    | mental_health                | Very strong Strong | -0,6263302   | 0,013442638 | -46,59280355 | scale       |
|    | Sleeping habits    | mental_health                | Strong Moderate    | 1,700357251  | 0,0173591   | 97,95192653  | scale       |
|    | Sleeping habits    | mental_health                | Moderate Weak      | 4,024139544  | 0,046918283 | 85,76911365  | scale       |
|    | Sleeping habits    | mental_health                | Weak No influence  | 5,773580481  | 0,110658832 | 52,17460178  | scale       |
|    | Sleeping habits    | relationship                 | Stable             | 0,26765391   | 0,02314894  | 11,56225363  | coefficient |
|    | Sleeping habits    | relationship                 | Very strong Strong | -0,433696101 | 0,017877662 | -24,25910646 | scale       |
|    | Sleeping habits    | relationship                 | Strong Moderate    | 1,895750332  | 0,02184296  | 86,78999051  | scale       |
|    | Sleeping habits    | relationship                 | Moderate Weak      | 4,220153305  | 0,048826563 | 86,43150544  | scale       |
|    | Sleeping habits    | relationship                 | Weak No influence  | 5,969729336  | 0,111484085 | 53,54781646  | scale       |
|    | Physical health    | age                          | 41-60              | -0,201395038 | 0,02544577  | -7,914676633 | coefficient |
|    | Physical health    | age                          | <= 40              | -0,269374457 | 0,033404947 | -8,06390902  | coefficient |



|    |                 |                              |                    |              |             |              |             |
|----|-----------------|------------------------------|--------------------|--------------|-------------|--------------|-------------|
| 1  |                 |                              |                    |              |             |              |             |
| 2  |                 |                              |                    |              |             |              |             |
| 3  |                 |                              |                    |              |             |              |             |
| 4  | Physical health | age                          | Very strong Strong | -0,674600391 | 0,017869087 | -37,7523699  | scale       |
| 5  | Physical health | age                          | Strong Moderate    | 1,827080893  | 0,02167838  | 84,28124811  | scale       |
| 6  | Physical health | age                          | Moderate Weak      | 4,036610085  | 0,050194477 | 80,41940788  | scale       |
| 7  | Physical health | age                          | Weak No influence  | 5,945663496  | 0,125682234 | 47,30711177  | scale       |
| 8  | Physical health | brain_disease_caregiver      | Yes                | -0,116590497 | 0,023190181 | -5,027580332 | coefficient |
| 9  | Physical health | brain_disease_caregiver      | Very strong Strong | -0,608564806 | 0,01662673  | -36,60159255 | scale       |
| 10 | Physical health | brain_disease_caregiver      | Strong Moderate    | 1,88836596   | 0,02098515  | 89,98582005  | scale       |
| 11 | Physical health | brain_disease_caregiver      | Moderate Weak      | 4,097411966  | 0,04991004  | 82,09594592  | scale       |
| 12 | Physical health | brain_disease_caregiver      | Weak No influence  | 6,006360135  | 0,125569375 | 47,8330017   | scale       |
| 13 | Physical health | brain_research_participation | Yes                | -0,055806385 | 0,023338556 | -2,391166954 | coefficient |
| 14 | Physical health | brain_research_participation | Very strong Strong | -0,578144592 | 0,016132495 | -35,8372699  | scale       |
| 15 | Physical health | brain_research_participation | Strong Moderate    | 1,917481577  | 0,020741729 | 92,44560013  | scale       |
| 16 | Physical health | brain_research_participation | Moderate Weak      | 4,126297324  | 0,049818014 | 82,82741481  | scale       |
| 17 | Physical health | brain_research_participation | Weak No influence  | 6,035178998  | 0,125533295 | 48,07632128  | scale       |
| 18 | Physical health | cognitive_health             | Below average      | 0,407609434  | 0,049588967 | 8,219760532  | coefficient |
| 19 | Physical health | cognitive_health             | Very strong Strong | -0,531596813 | 0,012818588 | -41,47077882 | scale       |
| 20 | Physical health | cognitive_health             | Strong Moderate    | 1,968671546  | 0,018576971 | 105,9737637  | scale       |
| 21 | Physical health | cognitive_health             | Moderate Weak      | 4,179535697  | 0,048992729 | 85,30930554  | scale       |
| 22 | Physical health | cognitive_health             | Weak No influence  | 6,088764026  | 0,125213247 | 48,62715535  | scale       |
| 23 | Physical health | education                    | Lower              | 0,31208189   | 0,025039083 | 12,4637909   | coefficient |
| 24 | Physical health | education                    | Very strong Strong | -0,45921212  | 0,014614755 | -31,42112991 | scale       |
| 25 | Physical health | education                    | Strong Moderate    | 2,046826174  | 0,020251677 | 101,0694675  | scale       |
| 26 | Physical health | education                    | Moderate Weak      | 4,257996435  | 0,049672333 | 85,72169295  | scale       |
| 27 | Physical health | education                    | Weak No influence  | 6,167308992  | 0,125479174 | 49,15006033  | scale       |
| 28 | Physical health | gender                       | Man                | 0,17410584   | 0,025768647 | 6,756499183  | coefficient |
| 29 | Physical health | gender                       | Other/Undisclosed  | -0,012793055 | 0,1737364   | -0,073634858 | coefficient |
| 30 | Physical health | gender                       | Very strong Strong | -0,505811092 | 0,014431912 | -35,04809886 | scale       |
| 31 | Physical health | gender                       | Strong Moderate    | 1,99247569   | 0,019833611 | 100,4595537  | scale       |
| 32 | Physical health | gender                       | Moderate Weak      | 4,202169985  | 0,049486087 | 84,91619036  | scale       |
| 33 | Physical health | gender                       | Weak No influence  | 6,111274062  | 0,12540569  | 48,7320318   | scale       |
| 34 | Physical health | healthcare_experience        | Yes                | -0,330649521 | 0,0238149   | -13,88414491 | coefficient |
| 35 | Physical health | healthcare_experience        | Very strong Strong | -0,685728977 | 0,015829277 | -43,32029569 | scale       |
| 36 | Physical health | healthcare_experience        | Strong Moderate    | 1,822471807  | 0,020005809 | 91,09713341  | scale       |
| 37 | Physical health | healthcare_experience        | Moderate Weak      | 4,034565148  | 0,049476274 | 81,54545173  | scale       |
| 38 | Physical health | healthcare_experience        | Weak No influence  | 5,9438644    | 0,125396824 | 47,40043814  | scale       |
| 39 | Physical health | illness_experience           | Yes                | 0,130605025  | 0,023603527 | 5,533284366  | coefficient |
| 40 | Physical health | illness_experience           | Very strong Strong | -0,502063225 | 0,015625854 | -32,13029098 | scale       |
| 41 | Physical health | illness_experience           | Strong Moderate    | 1,995231111  | 0,020730504 | 96,24614484  | scale       |
| 42 | Physical health | illness_experience           | Moderate Weak      | 4,204661542  | 0,049852726 | 84,34165736  | scale       |
| 43 | Physical health | illness_experience           | Weak No influence  | 6,113653395  | 0,125550205 | 48,69488993  | scale       |
| 44 | Physical health | mental_health                | Below average      | 0,185036971  | 0,034397452 | 5,379380195  | coefficient |
| 45 | Physical health | mental_health                | Very strong Strong | -0,530393983 | 0,013264657 | -39,98550171 | scale       |
| 46 | Physical health | mental_health                | Strong Moderate    | 1,966961483  | 0,01887315  | 104,2200971  | scale       |
| 47 | Physical health | mental_health                | Moderate Weak      | 4,176449696  | 0,049096771 | 85,06566936  | scale       |
| 48 | Physical health | mental_health                | Weak No influence  | 6,085354812  | 0,125250549 | 48,5854543   | scale       |
| 49 | Physical health | relationship                 | Stable             | -0,000514419 | 0,023295733 | -0,022082122 | coefficient |
| 50 | Physical health | relationship                 | Very strong Strong | -0,554207205 | 0,018111147 | -30,6003376  | scale       |
| 51 | Physical health | relationship                 | Strong Moderate    | 1,941039084  | 0,022427418 | 86,54759521  | scale       |
| 52 | Physical health | relationship                 | Moderate Weak      | 4,149762305  | 0,050540944 | 82,1069409   | scale       |
| 53 | Physical health | relationship                 | Weak No influence  | 6,058635647  | 0,125822128 | 48,15238596  | scale       |
| 54 | Genetics        | age                          | 41-60              | -0,060418627 | 0,024836691 | -2,432635905 | coefficient |
| 55 | Genetics        | age                          | <= 40              | 0,263212479  | 0,032801838 | 8,02432108   | coefficient |
| 56 | Genetics        | age                          | Very strong Strong | -0,478449627 | 0,017344892 | -27,58446771 | scale       |
| 57 | Genetics        | age                          | Strong Moderate    | 1,564354892  | 0,020027915 | 78,10872595  | scale       |
| 58 | Genetics        | age                          | Moderate Weak      | 3,735497857  | 0,041408526 | 90,21083853  | scale       |
| 59 | Genetics        | age                          | Weak No influence  | 5,516452471  | 0,095088089 | 58,014127    | scale       |
| 60 | Genetics        | brain_disease_caregiver      | Yes                | -0,334180143 | 0,022764262 | -14,68003413 | coefficient |
|    | Genetics        | brain_disease_caregiver      | Very strong Strong | -0,655799857 | 0,0166091   | -39,4843714  | scale       |
|    | Genetics        | brain_disease_caregiver      | Strong Moderate    | 1,393585003  | 0,018624995 | 74,82337768  | scale       |
|    | Genetics        | brain_disease_caregiver      | Moderate Weak      | 3,566379339  | 0,040590376 | 87,86268299  | scale       |
|    | Genetics        | brain_disease_caregiver      | Weak No influence  | 5,347729638  | 0,094725658 | 56,45492177  | scale       |
|    | Genetics        | brain_research_participation | Yes                | -0,180096912 | 0,022852976 | -7,880676514 | coefficient |
|    | Genetics        | brain_research_participation | Very strong Strong | -0,575053663 | 0,016016178 | -35,90455059 | scale       |
|    | Genetics        | brain_research_participation | Strong Moderate    | 1,465780161  | 0,018438497 | 79,49564304  | scale       |
|    | Genetics        | brain_research_participation | Moderate Weak      | 3,635035785  | 0,04055222  | 89,63839164  | scale       |
|    | Genetics        | brain_research_participation | Weak No influence  | 5,415692006  | 0,094712397 | 57,18039198  | scale       |
|    | Genetics        | cognitive_health             | Below average      | 0,069036957  | 0,048247366 | 1,430895888  | coefficient |
|    | Genetics        | cognitive_health             | Very strong Strong | -0,491981943 | 0,012746867 | -38,5963025  | scale       |
|    | Genetics        | cognitive_health             | Strong Moderate    | 1,545518438  | 0,016087679 | 96,0684528   | scale       |
|    | Genetics        | cognitive_health             | Moderate Weak      | 3,713420693  | 0,039599555 | 93,77430344  | scale       |

|    |               |                              |                    |              |             |              |             |
|----|---------------|------------------------------|--------------------|--------------|-------------|--------------|-------------|
| 1  |               |                              |                    |              |             |              |             |
| 2  |               |                              |                    |              |             |              |             |
| 3  |               |                              |                    |              |             |              |             |
| 4  | Genetics      | cognitive_health             | Weak No influence  | 5,493839542  | 0,094313386 | 58,25089938  | scale       |
| 5  | Genetics      | education                    | Lower              | 0,040952795  | 0,024397235 | 1,678583474  | coefficient |
| 6  | Genetics      | education                    | Very strong Strong | -0,483228697 | 0,014569517 | -33,16710447 | scale       |
| 7  | Genetics      | education                    | Strong Moderate    | 1,554317567  | 0,017600814 | 88,30941235  | scale       |
| 8  | Genetics      | education                    | Moderate Weak      | 3,722205734  | 0,040241605 | 92,49645426  | scale       |
| 9  | Genetics      | education                    | Weak No influence  | 5,502644673  | 0,094587158 | 58,17538883  | scale       |
| 10 | Genetics      | gender                       | Man                | 0,203988731  | 0,025163448 | 8,106549264  | coefficient |
| 11 | Genetics      | gender                       | Other/Undisclosed  | 0,719054536  | 0,168162771 | 4,275943662  | coefficient |
| 12 | Genetics      | gender                       | Very strong Strong | -0,436646469 | 0,014269779 | -30,5993856  | scale       |
| 13 | Genetics      | gender                       | Strong Moderate    | 1,60505269   | 0,017585915 | 91,26921665  | scale       |
| 14 | Genetics      | gender                       | Moderate Weak      | 3,775005686  | 0,040280792 | 93,71726501  | scale       |
| 15 | Genetics      | gender                       | Weak No influence  | 5,556156678  | 0,094608822 | 58,72768072  | scale       |
| 16 | Genetics      | healthcare_experience        | Yes                | -0,080391438 | 0,023226195 | -3,461240161 | coefficient |
| 17 | Genetics      | healthcare_experience        | Very strong Strong | -0,52729063  | 0,015392273 | -34,25683907 | scale       |
| 18 | Genetics      | healthcare_experience        | Strong Moderate    | 1,510803728  | 0,018106696 | 83,43895208  | scale       |
| 19 | Genetics      | healthcare_experience        | Moderate Weak      | 3,678923976  | 0,040430966 | 90,99272914  | scale       |
| 20 | Genetics      | healthcare_experience        | Weak No influence  | 5,459372016  | 0,094663004 | 57,67165398  | scale       |
| 21 | Genetics      | illness_experience           | Yes                | -0,060683402 | 0,023062714 | -2,631234201 | coefficient |
| 22 | Genetics      | illness_experience           | Very strong Strong | -0,52054547  | 0,015561633 | -33,45056928 | scale       |
| 23 | Genetics      | illness_experience           | Strong Moderate    | 1,517332301  | 0,018268164 | 83,058829    | scale       |
| 24 | Genetics      | illness_experience           | Moderate Weak      | 3,68526708   | 0,040512856 | 90,96537275  | scale       |
| 25 | Genetics      | illness_experience           | Weak No influence  | 5,465574519  | 0,094699001 | 57,71522865  | scale       |
| 26 | Genetics      | mental_health                | Below average      | -0,066756574 | 0,033654581 | -1,983580613 | coefficient |
| 27 | Genetics      | mental_health                | Very strong Strong | -0,504743307 | 0,013202523 | -38,2308222  | scale       |
| 28 | Genetics      | mental_health                | Strong Moderate    | 1,532974684  | 0,016388155 | 93,54162602  | scale       |
| 29 | Genetics      | mental_health                | Moderate Weak      | 3,700774279  | 0,039713589 | 93,18659783  | scale       |
| 30 | Genetics      | mental_health                | Weak No influence  | 5,481108038  | 0,094361404 | 58,0863342   | scale       |
| 31 | Genetics      | relationship                 | Stable             | -0,131168592 | 0,022795258 | -5,754205117 | coefficient |
| 32 | Genetics      | relationship                 | Very strong Strong | -0,570186039 | 0,01794289  | -31,77782624 | scale       |
| 33 | Genetics      | relationship                 | Strong Moderate    | 1,469063211  | 0,020150838 | 72,90332999  | scale       |
| 34 | Genetics      | relationship                 | Moderate Weak      | 3,637803817  | 0,041350009 | 87,97589022  | scale       |
| 35 | Genetics      | relationship                 | Weak No influence  | 5,418381769  | 0,095055801 | 57,00211546  | scale       |
| 36 | Substance use | age                          | 41-60              | -0,393655241 | 0,026834722 | -14,66962253 | coefficient |
| 37 | Substance use | age                          | <= 40              | -0,343658951 | 0,03534154  | -9,723938322 | coefficient |
| 38 | Substance use | age                          | Very strong Strong | 0,244257958  | 0,017696384 | 13,80270464  | scale       |
| 39 | Substance use | age                          | Strong Moderate    | 2,301262923  | 0,025533986 | 90,12548775  | scale       |
| 40 | Substance use | age                          | Moderate Weak      | 3,834757519  | 0,047281848 | 81,10422331  | scale       |
| 41 | Substance use | age                          | Weak No influence  | 4,461028808  | 0,063244337 | 70,53641458  | scale       |
| 42 | Substance use | brain_disease_caregiver      | Yes                | 0,001852138  | 0,024300637 | 0,076217687  | coefficient |
| 43 | Substance use | brain_disease_caregiver      | Very strong Strong | 0,445753533  | 0,016789724 | 26,54918749  | scale       |
| 44 | Substance use | brain_disease_caregiver      | Strong Moderate    | 2,491543452  | 0,025385874 | 98,14684626  | scale       |
| 45 | Substance use | brain_disease_caregiver      | Moderate Weak      | 4,022402234  | 0,047241521 | 85,14548522  | scale       |
| 46 | Substance use | brain_disease_caregiver      | Weak No influence  | 4,648186939  | 0,063217286 | 73,52715149  | scale       |
| 47 | Substance use | brain_research_participation | Yes                | 0,06970276   | 0,024440731 | 2,851909799  | coefficient |
| 48 | Substance use | brain_research_participation | Very strong Strong | 0,475211031  | 0,016343855 | 29,07582212  | scale       |
| 49 | Substance use | brain_research_participation | Strong Moderate    | 2,521385381  | 0,02515977  | 100,2149603  | scale       |
| 50 | Substance use | brain_research_participation | Moderate Weak      | 4,052243021  | 0,047130605 | 85,97901529  | scale       |
| 51 | Substance use | brain_research_participation | Weak No influence  | 4,678023474  | 0,063136754 | 74,09350649  | scale       |
| 52 | Substance use | cognitive_health             | Below average      | 0,371845597  | 0,049906561 | 7,450835887  | coefficient |
| 53 | Substance use | cognitive_health             | Very strong Strong | 0,467206457  | 0,012755129 | 36,62890929  | scale       |
| 54 | Substance use | cognitive_health             | Strong Moderate    | 2,515444177  | 0,022979544 | 109,4644937  | scale       |
| 55 | Substance use | cognitive_health             | Moderate Weak      | 4,047370487  | 0,046017988 | 87,95192095  | scale       |
| 56 | Substance use | cognitive_health             | Weak No influence  | 4,673509388  | 0,062314545 | 74,99869266  | scale       |
| 57 | Substance use | education                    | Lower              | 0,087600279  | 0,02611218  | 3,35476696   | coefficient |
| 58 | Substance use | education                    | Very strong Strong | 0,472187874  | 0,014838266 | 31,82230831  | scale       |
| 59 | Substance use | education                    | Strong Moderate    | 2,518309145  | 0,024180775 | 104,1450945  | scale       |
| 60 | Substance use | education                    | Moderate Weak      | 4,049468083  | 0,046633409 | 86,83620093  | scale       |
|    | Substance use | education                    | Weak No influence  | 4,67538968   | 0,062772568 | 74,48141542  | scale       |
|    | Substance use | gender                       | Man                | 0,285431929  | 0,026608108 | 10,72725365  | coefficient |
|    | Substance use | gender                       | Other/Undisclosed  | 0,433504685  | 0,175527388 | 2,469726756  | coefficient |
|    | Substance use | gender                       | Very strong Strong | 0,528913989  | 0,0146993   | 35,98225675  | scale       |
|    | Substance use | gender                       | Strong Moderate    | 2,580309369  | 0,024283614 | 106,2572237  | scale       |
|    | Substance use | gender                       | Moderate Weak      | 4,113005188  | 0,046705674 | 88,06221697  | scale       |
|    | Substance use | gender                       | Weak No influence  | 4,739085345  | 0,062824946 | 75,43317875  | scale       |
|    | Substance use | healthcare_experience        | Yes                | -0,275076891 | 0,025188879 | -10,920569   | coefficient |
|    | Substance use | healthcare_experience        | Very strong Strong | 0,340278232  | 0,015519939 | 21,92522963  | scale       |
|    | Substance use | healthcare_experience        | Strong Moderate    | 2,39156458   | 0,02431331  | 98,36441715  | scale       |
|    | Substance use | healthcare_experience        | Moderate Weak      | 3,92391617   | 0,046654043 | 84,10666964  | scale       |
|    | Substance use | healthcare_experience        | Weak No influence  | 4,549875435  | 0,062779518 | 72,47388328  | scale       |
|    | Substance use | illness_experience           | Yes                | 0,090975914  | 0,02468523  | 3,685439195  | coefficient |

|    |               |                    |                    |             |             |             |             |
|----|---------------|--------------------|--------------------|-------------|-------------|-------------|-------------|
| 1  |               |                    |                    |             |             |             |             |
| 2  |               |                    |                    |             |             |             |             |
| 3  |               |                    |                    |             |             |             |             |
| 4  | Substance use | illness_experience | Very strong Strong | 0,481582819 | 0,015919936 | 30,25029846 | scale       |
| 5  | Substance use | illness_experience | Strong Moderate    | 2,527859919 | 0,024886882 | 101,573991  | scale       |
| 6  | Substance use | illness_experience | Moderate Weak      | 4,058991996 | 0,047002126 | 86,35762626 | scale       |
| 7  | Substance use | illness_experience | Weak No influence  | 4,684816735 | 0,063044401 | 74,30979896 | scale       |
| 8  | Substance use | mental_health      | Below average      | 0,07080795  | 0,035659072 | 1,985692434 | coefficient |
| 9  | Substance use | mental_health      | Very strong Strong | 0,454235257 | 0,013243104 | 34,29975818 | scale       |
| 10 | Substance use | mental_health      | Strong Moderate    | 2,50019857  | 0,023208136 | 107,7293994 | scale       |
| 11 | Substance use | mental_health      | Moderate Weak      | 4,031101784 | 0,04612129  | 87,40219025 | scale       |
| 12 | Substance use | mental_health      | Weak No influence  | 4,656915014 | 0,062388039 | 74,64435681 | scale       |
| 13 | Substance use | relationship       | Stable             | -0,01567732 | 0,024420594 | -0,64197129 | coefficient |
| 14 | Substance use | relationship       | Very strong Strong | 0,436111692 | 0,018423323 | 23,67171744 | scale       |
| 15 | Substance use | relationship       | Strong Moderate    | 2,481926022 | 0,026458714 | 93,80372927 | scale       |
| 16 | Substance use | relationship       | Moderate Weak      | 4,01280529  | 0,047826927 | 83,90263737 | scale       |
| 17 | Substance use | relationship       | Weak No influence  | 4,638588509 | 0,063659    | 72,86618543 | scale       |

## QUESTION 2\_CONTINUOUS

| key | fct         | term                         | estimate          | std.error    | statistic   | p.value      |             |
|-----|-------------|------------------------------|-------------------|--------------|-------------|--------------|-------------|
| 24  | In the womb | age                          | (Intercept)       | 3,245447284  | 0,007643552 | 424,5993328  | 0           |
| 25  | In the womb | age                          | 41-60             | 0,165538302  | 0,011386898 | 14,53761184  | 1,05617E-47 |
| 26  | In the womb | age                          | <= 40             | 0,182421201  | 0,014900553 | 12,24257927  | 2,26658E-34 |
| 28  | In the womb | brain_disease_caregiver      | (Intercept)       | 3,300884956  | 0,007111198 | 464,181248   | 0           |
| 29  | In the womb | brain_disease_caregiver      | Yes               | 0,07918128   | 0,010425668 | 7,59484011   | 3,18042E-14 |
| 30  | In the womb | brain_research_participation | (Intercept)       | 3,335809327  | 0,006907501 | 482,9256227  | 0           |
| 31  | In the womb | brain_research_participation | Yes               | 0,004430123  | 0,010508932 | 0,421557843  | 0,673351107 |
| 32  | In the womb | cognitive_health             | (Intercept)       | 3,34998244   | 0,005360338 | 624,9573358  | 0           |
| 33  | In the womb | cognitive_health             | Below average     | -0,204761852 | 0,021907209 | -9,346779691 | 9,70486E-21 |
| 34  | In the womb | education                    | (Intercept)       | 3,406585197  | 0,006234115 | 546,4424653  | 0           |
| 35  | In the womb | education                    | Lower             | -0,220317591 | 0,011150901 | -19,75782794 | 2,76257E-86 |
| 36  | In the womb | gender                       | (Intercept)       | 3,39854886   | 0,006126016 | 554,7731018  | 0           |
| 37  | In the womb | gender                       | Man               | -0,215715462 | 0,011499037 | -18,75943719 | 5,03167E-78 |
| 38  | In the womb | gender                       | Other/Undisclosed | 0,02545114   | 0,07662762  | 0,33214055   | 0,739785686 |
| 39  | In the womb | healthcare_experience        | (Intercept)       | 3,245710528  | 0,006584724 | 492,9152294  | 0           |
| 40  | In the womb | healthcare_experience        | Yes               | 0,238148188  | 0,010593442 | 22,48071915  | 6,543E-111  |
| 41  | In the womb | illness_experience           | (Intercept)       | 3,338577838  | 0,006737961 | 495,4878723  | 0           |
| 42  | In the womb | illness_experience           | Yes               | -0,002119884 | 0,010612657 | -0,199750526 | 0,841677186 |
| 43  | In the womb | mental_health                | (Intercept)       | 3,3403617    | 0,00558676  | 597,9067929  | 0           |
| 44  | In the womb | mental_health                | Below average     | -0,020016585 | 0,015388148 | -1,300779315 | 0,193345001 |
| 45  | In the womb | relationship                 | (Intercept)       | 3,329508606  | 0,007836851 | 424,852858   | 0           |
| 46  | In the womb | relationship                 | Stable            | 0,014700953  | 0,010483785 | 1,402256309  | 0,160850111 |
| 47  | Childhood   | age                          | (Intercept)       | 3,586171392  | 0,005233366 | 685,2513777  | 0           |
| 48  | Childhood   | age                          | 41-60             | 0,117820061  | 0,00780839  | 15,08890589  | 3,07903E-51 |
| 49  | Childhood   | age                          | <= 40             | 0,181446806  | 0,010222882 | 17,74908625  | 4,32692E-70 |
| 50  | Childhood   | brain_disease_caregiver      | (Intercept)       | 3,661505934  | 0,004892243 | 748,430891   | 0           |
| 51  | Childhood   | brain_disease_caregiver      | Yes               | -0,002973176 | 0,007174124 | -0,414430506 | 0,678562095 |
| 52  | Childhood   | brain_research_participation | (Intercept)       | 3,668358497  | 0,004747624 | 772,6725733  | 0           |
| 53  | Childhood   | brain_research_participation | Yes               | -0,019059392 | 0,007222616 | -2,638849006 | 0,008323507 |
| 54  | Childhood   | cognitive_health             | (Intercept)       | 3,667197205  | 0,003686788 | 994,6861229  | 0           |
| 55  | Childhood   | cognitive_health             | Below average     | -0,117713295 | 0,015039457 | -7,826964421 | 5,17745E-15 |
| 56  | Childhood   | education                    | (Intercept)       | 3,695825366  | 0,004299974 | 859,4994227  | 0           |
| 57  | Childhood   | education                    | Lower             | -0,114055929 | 0,007685609 | -14,84019472 | 1,2554E-49  |
| 58  | Childhood   | gender                       | (Intercept)       | 3,685521057  | 0,004230164 | 871,2478045  | 0           |
| 59  | Childhood   | gender                       | Man               | -0,090338162 | 0,007929623 | -11,39249145 | 5,32471E-30 |
| 60  | Childhood   | gender                       | Other/Undisclosed | 0,042478943  | 0,053028104 | 0,801064701  | 0,423101136 |
|     | Childhood   | healthcare_experience        | (Intercept)       | 3,616600321  | 0,004546503 | 795,4686182  | 0           |
|     | Childhood   | healthcare_experience        | Yes               | 0,112786971  | 0,007318928 | 15,41031229  | 2,33724E-53 |
|     | Childhood   | illness_experience           | (Intercept)       | 3,661181796  | 0,004633111 | 790,2211103  | 0           |
|     | Childhood   | illness_experience           | Yes               | -0,002623156 | 0,00729366  | -0,359648802 | 0,719112555 |
|     | Childhood   | mental_health                | (Intercept)       | 3,657099634  | 0,003839791 | 952,4215004  | 0           |
|     | Childhood   | mental_health                | Below average     | 0,022955767  | 0,010579978 | 2,169736836  | 0,030035351 |
|     | Childhood   | relationship                 | (Intercept)       | 3,669424907  | 0,00538816  | 681,0163825  | 0           |
|     | Childhood   | relationship                 | Stable            | -0,016638064 | 0,007206319 | -2,30881607  | 0,020961192 |
|     | Adolescence | age                          | (Intercept)       | 3,600759554  | 0,004869339 | 739,4759799  | 0           |
|     | Adolescence | age                          | 41-60             | 0,101076646  | 0,007268086 | 13,90691469  | 8,10447E-44 |
|     | Adolescence | age                          | <= 40             | 0,156998874  | 0,009519322 | 16,49265252  | 8,14107E-61 |
|     | Adolescence | brain_disease_caregiver      | (Intercept)       | 3,662326152  | 0,004548612 | 805,1524513  | 0           |
|     | Adolescence | brain_disease_caregiver      | Yes               | 0,004392831  | 0,006671224 | 0,658474527  | 0,510238791 |
|     | Adolescence | brain_research_participation | (Intercept)       | 3,664119196  | 0,004414784 | 829,9656518  | 0           |
|     | Adolescence | brain_research_participation | Yes               | 0,00057675   | 0,00671732  | 0,085860131  | 0,931578233 |
|     | Adolescence | cognitive_health             | (Intercept)       | 3,669758597  | 0,003429402 | 1070,087053  | 0           |
|     | Adolescence | cognitive_health             | Below average     | -0,089819387 | 0,013999028 | -6,416116052 | 1,42076E-10 |

|    |                 |                              |                   |              |             |              |             |
|----|-----------------|------------------------------|-------------------|--------------|-------------|--------------|-------------|
| 1  |                 |                              |                   |              |             |              |             |
| 2  |                 |                              |                   |              |             |              |             |
| 3  |                 |                              |                   |              |             |              |             |
| 4  | Adolescence     | education                    | (Intercept)       | 3,684548786  | 0,00400901  | 919,0670216  | 0           |
| 5  | Adolescence     | education                    | Lower             | -0,06444161  | 0,007163986 | -8,995217516 | 2,5061E-19  |
| 6  | Adolescence     | gender                       | (Intercept)       | 3,689473145  | 0,003933221 | 938,0283522  | 0           |
| 7  | Adolescence     | gender                       | Man               | -0,08926733  | 0,007368788 | -12,11424883 | 1,08256E-33 |
| 8  | Adolescence     | gender                       | Other/Undisclosed | 0,046526855  | 0,049298187 | 0,943784299  | 0,345288205 |
| 9  | Adolescence     | healthcare_experience        | (Intercept)       | 3,629462429  | 0,004232227 | 857,577495   | 0           |
| 10 | Adolescence     | healthcare_experience        | Yes               | 0,090469492  | 0,006813506 | 13,27796449  | 4,13399E-40 |
| 11 | Adolescence     | illness_experience           | (Intercept)       | 3,661121644  | 0,004308087 | 849,8253566  | 0           |
| 12 | Adolescence     | illness_experience           | Yes               | 0,00804653   | 0,006782181 | 1,186422205  | 0,23546589  |
| 13 | Adolescence     | mental_health                | (Intercept)       | 3,661358097  | 0,003570712 | 1025,385958  | 0           |
| 14 | Adolescence     | mental_health                | Below average     | 0,022837862  | 0,009835202 | 2,322053058  | 0,020237368 |
| 15 | Adolescence     | relationship                 | (Intercept)       | 3,678414826  | 0,005009532 | 734,283164   | 0           |
| 16 | Adolescence     | relationship                 | Stable            | -0,025125867 | 0,00669998  | -3,750140688 | 0,000177099 |
| 17 | Young adulthood | age                          | (Intercept)       | 3,506135698  | 0,005227122 | 670,7583068  | 0           |
| 18 | Young adulthood | age                          | 41-60             | 0,074945383  | 0,007802222 | 9,605646528  | 8,19186E-22 |
| 19 | Young adulthood | age                          | <= 40             | 0,074444659  | 0,01021554  | 7,287393098  | 3,2455E-13  |
| 20 | Young adulthood | brain_disease_caregiver      | (Intercept)       | 3,521973523  | 0,004857763 | 725,0195545  | 0           |
| 21 | Young adulthood | brain_disease_caregiver      | Yes               | 0,052616448  | 0,007122821 | 7,387023826  | 1,54435E-13 |
| 22 | Young adulthood | brain_research_participation | (Intercept)       | 3,537823234  | 0,00472037  | 749,4799919  | 0           |
| 23 | Young adulthood | brain_research_participation | Yes               | 0,019935605  | 0,007177118 | 2,777661506  | 0,005478885 |
| 24 | Young adulthood | cognitive_health             | (Intercept)       | 3,549739846  | 0,003667057 | 968,0078395  | 0           |
| 25 | Young adulthood | cognitive_health             | Below average     | -0,054913309 | 0,014974433 | -3,667137916 | 0,000245744 |
| 26 | Young adulthood | education                    | (Intercept)       | 3,550897885  | 0,004290288 | 827,6596076  | 0           |
| 27 | Young adulthood | education                    | Lower             | -0,014221501 | 0,007668684 | -1,85449028  | 0,063679788 |
| 28 | Young adulthood | gender                       | (Intercept)       | 3,582004614  | 0,004195657 | 853,7410265  | 0           |
| 29 | Young adulthood | gender                       | Man               | -0,124556436 | 0,007861978 | -15,84288765 | 2,80041E-56 |
| 30 | Young adulthood | gender                       | Other/Undisclosed | -0,054004614 | 0,05257813  | -1,02713076  | 0,304367965 |
| 31 | Young adulthood | healthcare_experience        | (Intercept)       | 3,510313262  | 0,004524692 | 775,8126258  | 0           |
| 32 | Young adulthood | healthcare_experience        | Yes               | 0,093620917  | 0,007283177 | 12,85440578  | 1,04445E-37 |
| 33 | Young adulthood | illness_experience           | (Intercept)       | 3,533492384  | 0,004602268 | 767,7720118  | 0           |
| 34 | Young adulthood | illness_experience           | Yes               | 0,032118476  | 0,007246733 | 4,43213192   | 9,36679E-06 |
| 35 | Young adulthood | mental_health                | (Intercept)       | 3,547315761  | 0,003816573 | 929,4504417  | 0           |
| 36 | Young adulthood | mental_health                | Below average     | -0,006595539 | 0,010514086 | -0,627305052 | 0,53046452  |
| 37 | Young adulthood | relationship                 | (Intercept)       | 3,549110468  | 0,00535451  | 662,8263862  | 0           |
| 38 | Young adulthood | relationship                 | Stable            | -0,004766162 | 0,007162346 | -0,665447141 | 0,505770144 |
| 39 | Middle age      | age                          | (Intercept)       | 3,563946599  | 0,00509074  | 700,084227   | 0           |
| 40 | Middle age      | age                          | 41-60             | 0,097896656  | 0,007601051 | 12,87935787  | 7,57396E-38 |
| 41 | Middle age      | age                          | <= 40             | -0,008341418 | 0,009958783 | -0,837594189 | 0,402265955 |
| 42 | Middle age      | brain_disease_caregiver      | (Intercept)       | 3,557267521  | 0,004731528 | 751,8220739  | 0           |
| 43 | Middle age      | brain_disease_caregiver      | Yes               | 0,09039032   | 0,006936152 | 13,03176748  | 1,05191E-38 |
| 44 | Middle age      | brain_research_participation | (Intercept)       | 3,586689793  | 0,004605607 | 778,7659927  | 0           |
| 45 | Middle age      | brain_research_participation | Yes               | 0,029219873  | 0,007002626 | 4,172702181  | 3,01935E-05 |
| 46 | Middle age      | cognitive_health             | (Intercept)       | 3,602528308  | 0,003578597 | 1006,687215  | 0           |
| 47 | Middle age      | cognitive_health             | Below average     | -0,053318101 | 0,01460974  | -3,649489964 | 0,000263249 |
| 48 | Middle age      | education                    | (Intercept)       | 3,60337508   | 0,004187135 | 860,5825516  | 0           |
| 49 | Middle age      | education                    | Lower             | -0,012921063 | 0,007482813 | -1,726765387 | 0,084221065 |
| 50 | Middle age      | gender                       | (Intercept)       | 3,645423833  | 0,004079765 | 893,5377835  | 0           |
| 51 | Middle age      | gender                       | Man               | -0,16002566  | 0,007647045 | -20,926469   | 1,74688E-96 |
| 52 | Middle age      | gender                       | Other/Undisclosed | -0,165423833 | 0,051166169 | -3,233070517 | 0,00122612  |
| 53 | Middle age      | healthcare_experience        | (Intercept)       | 3,573684836  | 0,004422236 | 808,1172343  | 0           |
| 54 | Middle age      | healthcare_experience        | Yes               | 0,066420905  | 0,007117008 | 9,332700413  | 1,10753E-20 |
| 55 | Middle age      | illness_experience           | (Intercept)       | 3,592239536  | 0,004492833 | 799,5489516  | 0           |
| 56 | Middle age      | illness_experience           | Yes               | 0,017571649  | 0,007073113 | 2,484287824  | 0,012987004 |
| 57 | Middle age      | mental_health                | (Intercept)       | 3,602569485  | 0,003724166 | 967,3494394  | 0           |
| 58 | Middle age      | mental_health                | Below average     | -0,02458276  | 0,010257921 | -2,396466134 | 0,016560676 |
| 59 | Middle age      | relationship                 | (Intercept)       | 3,589402331  | 0,005225612 | 686,8865134  | 0           |
| 60 | Middle age      | relationship                 | Stable            | 0,017756826  | 0,006988943 | 2,540702648  | 0,011068458 |
|    | Old age         | age                          | (Intercept)       | 3,693806706  | 0,004957745 | 745,0578264  | 0           |
|    | Old age         | age                          | 41-60             | 0,010389913  | 0,007405649 | 1,402971265  | 0,160636719 |
|    | Old age         | age                          | <= 40             | -0,090058379 | 0,009699937 | -9,284428885 | 1,74207E-20 |
|    | Old age         | brain_disease_caregiver      | (Intercept)       | 3,652997275  | 0,004608248 | 792,7084909  | 0           |
|    | Old age         | brain_disease_caregiver      | Yes               | 0,064487652  | 0,0067562   | 9,544959523  | 1,47071E-21 |
|    | Old age         | brain_research_participation | (Intercept)       | 3,662901155  | 0,004476786 | 818,1988991  | 0           |
|    | Old age         | brain_research_participation | Yes               | 0,046474634  | 0,006807721 | 6,826753809  | 8,86654E-12 |
|    | Old age         | cognitive_health             | (Intercept)       | 3,686092921  | 0,003480529 | 1059,061057  | 0           |
|    | Old age         | cognitive_health             | Below average     | -0,051664697 | 0,014222419 | -3,632623815 | 0,000281065 |
|    | Old age         | education                    | (Intercept)       | 3,695400774  | 0,004071149 | 907,7046112  | 0           |
|    | Old age         | education                    | Lower             | -0,039586821 | 0,007273557 | -5,442566753 | 5,29675E-08 |
|    | Old age         | gender                       | (Intercept)       | 3,717677155  | 0,003981326 | 933,7785175  | 0           |
|    | Old age         | gender                       | Man               | -0,119682039 | 0,007461019 | -16,04097865 | 1,20928E-57 |

|    |         |                       |                   |              |             |              |             |
|----|---------|-----------------------|-------------------|--------------|-------------|--------------|-------------|
| 1  |         |                       |                   |              |             |              |             |
| 2  |         |                       |                   |              |             |              |             |
| 3  |         |                       |                   |              |             |              |             |
| 4  | Old age | gender                | Other/Undisclosed | -0,165677155 | 0,049943039 | -3,317322246 | 0,000910028 |
| 5  | Old age | healthcare_experience | (Intercept)       | 3,668109839  | 0,004304588 | 852,1396671  | 0           |
| 6  | Old age | healthcare_experience | Yes               | 0,038594599  | 0,006930469 | 5,568828931  | 2,58856E-08 |
| 7  | Old age | illness_experience    | (Intercept)       | 3,678488585  | 0,004369322 | 841,890035   | 0           |
| 8  | Old age | illness_experience    | Yes               | 0,011185279  | 0,0068808   | 1,625578262  | 0,104050883 |
| 9  | Old age | mental_health         | (Intercept)       | 3,688564477  | 0,003621109 | 1018,628509  | 0           |
| 10 | Old age | mental_health         | Below average     | -0,042287145 | 0,00998129  | -4,236641428 | 2,27627E-05 |
| 11 | Old age | relationship          | (Intercept)       | 3,66958533   | 0,005081823 | 722,1002441  | 0           |
| 12 | Old age | relationship          | Stable            | 0,023995641  | 0,006796967 | 3,530345627  | 0,000415697 |
| 13 |         |                       |                   |              |             |              |             |
| 14 |         |                       |                   |              |             |              |             |

## QUESTION 2\_BINARY

| 17 | key         | fct                          | term              | estimate     | std.error   | statistic    | p.value     |
|----|-------------|------------------------------|-------------------|--------------|-------------|--------------|-------------|
| 18 | In the womb | age                          | (Intercept)       | 1,433384517  | 0,02266467  | 63,24312319  | 0           |
| 19 | In the womb | age                          | 41-60             | 0,39942291   | 0,036508493 | 10,94054763  | 7,37531E-28 |
| 20 | In the womb | age                          | <= 40             | 0,392984139  | 0,04884938  | 8,044813188  | 8,63771E-16 |
| 21 | In the womb | brain_disease_caregiver      | (Intercept)       | 1,526540763  | 0,02162931  | 70,57741461  | 0           |
| 22 | In the womb | brain_disease_caregiver      | Yes               | 0,243946164  | 0,033198025 | 7,34821326   | 2,00874E-13 |
| 23 | In the womb | brain_research_participation | (Intercept)       | 1,650138007  | 0,021862208 | 75,47901908  | 0           |
| 24 | In the womb | brain_research_participation | Yes               | -0,034676288 | 0,033041897 | -1,049464202 | 0,293964523 |
| 25 | In the womb | cognitive_health             | (Intercept)       | 1,670859676  | 0,017112809 | 97,63795397  | 0           |
| 26 | In the womb | cognitive_health             | Below average     | -0,512528153 | 0,060515273 | -8,469401633 | 2,46657E-17 |
| 27 | In the womb | education                    | (Intercept)       | 1,817712102  | 0,021071346 | 86,2646428   | 0           |
| 28 | In the womb | education                    | Lower             | -0,520718132 | 0,033766881 | -15,42097213 | 1,1831E-53  |
| 29 | In the womb | gender                       | (Intercept)       | 1,809157516  | 0,020628086 | 87,70360566  | 0           |
| 30 | In the womb | gender                       | Man               | -0,544081287 | 0,034380048 | -15,82549525 | 2,0756E-56  |
| 31 | In the womb | gender                       | Other/Undisclosed | 0,039760367  | 0,261740754 | 0,151907437  | 0,879259942 |
| 32 | In the womb | healthcare_experience        | (Intercept)       | 1,417372439  | 0,01951252  | 72,63912748  | 0           |
| 33 | In the womb | healthcare_experience        | Yes               | 0,64889144   | 0,036500253 | 17,77772438  | 1,05163E-70 |
| 34 | In the womb | illness_experience           | (Intercept)       | 1,643830172  | 0,021280082 | 77,24735903  | 0           |
| 35 | In the womb | illness_experience           | Yes               | -0,02167     | 0,033371986 | -0,649347046 | 0,516114083 |
| 36 | In the womb | mental_health                | (Intercept)       | 1,65432219   | 0,017707659 | 93,42410699  | 0           |
| 37 | In the womb | mental_health                | Below average     | -0,140348884 | 0,046858049 | -2,995192663 | 0,002742715 |
| 38 | In the womb | relationship                 | (Intercept)       | 1,600782432  | 0,024396442 | 65,61540596  | 0           |
| 39 | In the womb | relationship                 | Stable            | 0,061907317  | 0,03294153  | 1,879309066  | 0,060202305 |
| 40 | Childhood   | age                          | (Intercept)       | 2,647660083  | 0,035810826 | 73,93462812  | 0           |
| 41 | Childhood   | age                          | 41-60             | 0,573946188  | 0,062570359 | 9,172812711  | 4,60835E-20 |
| 42 | Childhood   | age                          | <= 40             | 0,636217119  | 0,087673405 | 7,256671736  | 3,96731E-13 |
| 43 | Childhood   | brain_disease_caregiver      | (Intercept)       | 2,920433845  | 0,037484581 | 77,91026964  | 0           |
| 44 | Childhood   | brain_disease_caregiver      | Yes               | 0,01618648   | 0,055183253 | 0,293322331  | 0,769275786 |
| 45 | Childhood   | brain_research_participation | (Intercept)       | 2,959760507  | 0,0370297   | 79,92936784  | 0           |
| 46 | Childhood   | brain_research_participation | Yes               | -0,072326395 | 0,055319424 | -1,307432183 | 0,191065973 |
| 47 | Childhood   | cognitive_health             | (Intercept)       | 2,972579534  | 0,028950775 | 102,677029   | 0           |
| 48 | Childhood   | cognitive_health             | Below average     | -0,580630761 | 0,093526532 | -6,208193003 | 5,35973E-10 |
| 49 | Childhood   | education                    | (Intercept)       | 3,13350086   | 0,036437491 | 85,99661418  | 0           |
| 50 | Childhood   | education                    | Lower             | -0,556564733 | 0,055707083 | -9,990915075 | 1,67033E-23 |
| 51 | Childhood   | gender                       | (Intercept)       | 3,102944413  | 0,035284951 | 87,9395983   | 0           |
| 52 | Childhood   | gender                       | Man               | -0,523198583 | 0,056672183 | -9,232017402 | 2,65582E-20 |
| 53 | Childhood   | gender                       | Other/Undisclosed | -0,115580401 | 0,419869086 | -0,275277234 | 0,783103254 |
| 54 | Childhood   | healthcare_experience        | (Intercept)       | 2,701919284  | 0,031758134 | 85,07802438  | 0           |
| 55 | Childhood   | healthcare_experience        | Yes               | 0,721191915  | 0,06403297  | 11,26282155  | 2,00243E-29 |
| 56 | Childhood   | illness_experience           | (Intercept)       | 2,961830714  | 0,036165737 | 81,89604224  | 0           |
| 57 | Childhood   | illness_experience           | Yes               | -0,082192854 | 0,055713845 | -1,475268017 | 0,140140501 |
| 58 | Childhood   | mental_health                | (Intercept)       | 2,932865942  | 0,029587706 | 99,12447959  | 0           |
| 59 | Childhood   | mental_health                | Below average     | -0,036924775 | 0,080363914 | -0,4594696   | 0,645896978 |
| 60 | Childhood   | relationship                 | (Intercept)       | 2,983892691  | 0,042484064 | 70,23557618  | 0           |
|    | Childhood   | relationship                 | Stable            | -0,098195769 | 0,055752023 | -1,761295177 | 0,078188456 |
|    | Adolescence | age                          | (Intercept)       | 3,061983928  | 0,043043397 | 71,13713431  | 0           |
|    | Adolescence | age                          | 41-60             | 0,537126535  | 0,074847407 | 7,17628785   | 7,16297E-13 |
|    | Adolescence | age                          | <= 40             | 0,759156578  | 0,111788979 | 6,790978752  | 1,11375E-11 |
|    | Adolescence | brain_disease_caregiver      | (Intercept)       | 3,344133081  | 0,045503621 | 73,49158094  | 0           |
|    | Adolescence | brain_disease_caregiver      | Yes               | -0,001474376 | 0,066713386 | -0,022100148 | 0,982368069 |
|    | Adolescence | brain_research_participation | (Intercept)       | 3,363383228  | 0,044562637 | 75,47540898  | 0           |
|    | Adolescence | brain_research_participation | Yes               | -0,045602463 | 0,066998548 | -0,68064853  | 0,496093912 |
|    | Adolescence | cognitive_health             | (Intercept)       | 3,400155172  | 0,0352424   | 96,47910427  | 0           |
|    | Adolescence | cognitive_health             | Below average     | -0,694048606 | 0,107699921 | -6,444281463 | 1,16149E-10 |
|    | Adolescence | education                    | (Intercept)       | 3,486756701  | 0,042937646 | 81,20511967  | 0           |
|    | Adolescence | education                    | Lower             | -0,403481277 | 0,068007707 | -5,932875792 | 2,97674E-09 |
|    | Adolescence | gender                       | (Intercept)       | 3,469707209  | 0,041840558 | 82,92688603  | 0           |
|    | Adolescence | gender                       | Man               | -0,387904861 | 0,069409788 | -5,588619003 | 2,28883E-08 |
|    | Adolescence | gender                       | Other/Undisclosed | -0,291653378 | 0,458349143 | -0,636312695 | 0,524572632 |

|    |                 |                              |                   |              |             |              |             |   |
|----|-----------------|------------------------------|-------------------|--------------|-------------|--------------|-------------|---|
| 1  |                 |                              |                   |              |             |              |             |   |
| 2  |                 |                              |                   |              |             |              |             |   |
| 3  |                 |                              |                   |              |             |              |             |   |
| 4  | Adolescence     | healthcare_experience        | (Intercept)       | 3,154186349  | 0,03890133  | 81,08170916  |             | 0 |
| 5  | Adolescence     | healthcare_experience        | Yes               | 0,583289676  | 0,075332592 | 7,742859497  | 9,72054E-15 |   |
| 6  | Adolescence     | illness_experience           | (Intercept)       | 3,346680419  | 0,043149397 | 77,56030579  |             | 0 |
| 7  | Adolescence     | illness_experience           | Yes               | -0,007994883 | 0,06777916  | -0,117954884 | 0,906103406 |   |
| 8  | Adolescence     | mental_health                | (Intercept)       | 3,358550807  | 0,035964991 | 93,38389174  |             | 0 |
| 9  | Adolescence     | mental_health                | Below average     | -0,10961289  | 0,09480721  | -1,156166192 | 0,247613185 |   |
| 10 | Adolescence     | relationship                 | (Intercept)       | 3,419650954  | 0,051926882 | 65,85511829  |             | 0 |
| 11 | Adolescence     | relationship                 | Stable            | -0,132710224 | 0,067643846 | -1,961896478 | 0,049774538 |   |
| 12 | Adolescence     | relationship                 | Stable            | -0,132710224 | 0,067643846 | -1,961896478 | 0,049774538 |   |
| 13 | Young adulthood | age                          | (Intercept)       | 2,851041538  | 0,039153805 | 72,81646172  |             | 0 |
| 14 | Young adulthood | age                          | 41-60             | 0,462892609  | 0,066361564 | 6,975311914  | 3,05193E-12 |   |
| 15 | Young adulthood | age                          | <= 40             | 0,19161174   | 0,081662994 | 2,346371738  | 0,01895719  |   |
| 16 | Young adulthood | age                          | <= 40             | 0,19161174   | 0,081662994 | 2,346371738  | 0,01895719  |   |
| 17 | Young adulthood | brain_disease_caregiver      | (Intercept)       | 2,942572905  | 0,03787132  | 77,69924286  |             | 0 |
| 18 | Young adulthood | brain_disease_caregiver      | Yes               | 0,212669938  | 0,058612645 | 3,628396885  | 0,000285187 |   |
| 19 | Young adulthood | brain_research_participation | (Intercept)       | 3,055902331  | 0,038699064 | 78,9657946   |             | 0 |
| 20 | Young adulthood | brain_research_participation | Yes               | -0,044555213 | 0,058175525 | -0,765875557 | 0,443750351 |   |
| 21 | Young adulthood | brain_research_participation | Yes               | -0,044555213 | 0,058175525 | -0,765875557 | 0,443750351 |   |
| 22 | Young adulthood | cognitive_health             | (Intercept)       | 3,06679394   | 0,030215997 | 101,4957062  |             | 0 |
| 23 | Young adulthood | cognitive_health             | Below average     | -0,42250784  | 0,103629829 | -4,077087113 | 4,56034E-05 |   |
| 24 | Young adulthood | cognitive_health             | Below average     | -0,42250784  | 0,103629829 | -4,077087113 | 4,56034E-05 |   |
| 25 | Young adulthood | education                    | (Intercept)       | 3,019756419  | 0,034598529 | 87,27990709  |             | 0 |
| 26 | Young adulthood | education                    | Lower             | 0,054108847  | 0,06290356  | 0,860187352  | 0,389685776 |   |
| 27 | Young adulthood | education                    | Lower             | 0,054108847  | 0,06290356  | 0,860187352  | 0,389685776 |   |
| 28 | Young adulthood | gender                       | (Intercept)       | 3,238731733  | 0,03757625  | 86,19092413  |             | 0 |
| 29 | Young adulthood | gender                       | Man               | -0,583420659 | 0,059249953 | -9,84677006  | 7,07821E-23 |   |
| 30 | Young adulthood | gender                       | Other/Undisclosed | -0,682366119 | 0,348057144 | -1,960500255 | 0,049937348 |   |
| 31 | Young adulthood | healthcare_experience        | (Intercept)       | 2,877830648  | 0,0343345   | 83,817462    |             | 0 |
| 32 | Young adulthood | healthcare_experience        | Yes               | 0,47045947   | 0,063735904 | 7,381388477  | 1,56647E-13 |   |
| 33 | Young adulthood | illness_experience           | (Intercept)       | 2,988242549  | 0,036600171 | 81,64558904  |             | 0 |
| 34 | Young adulthood | illness_experience           | Yes               | 0,123525475  | 0,059636228 | 2,071316042  | 0,038329271 |   |
| 35 | Young adulthood | illness_experience           | Yes               | 0,123525475  | 0,059636228 | 2,071316042  | 0,038329271 |   |
| 36 | Young adulthood | mental_health                | (Intercept)       | 3,063311684  | 0,031390772 | 97,58637635  |             | 0 |
| 37 | Young adulthood | mental_health                | Below average     | -0,189483622 | 0,080368291 | -2,357691311 | 0,018388977 |   |
| 38 | Young adulthood | relationship                 | (Intercept)       | 2,998428969  | 0,042763888 | 70,11591177  |             | 0 |
| 39 | Young adulthood | relationship                 | Stable            | 0,068906534  | 0,058009797 | 1,187843032  | 0,234895257 |   |
| 40 | Middle age      | age                          | (Intercept)       | 3,009419685  | 0,041994803 | 71,66171668  |             | 0 |
| 41 | Middle age      | age                          | 41-60             | 0,521147998  | 0,072639315 | 7,174461873  | 7,25921E-13 |   |
| 42 | Middle age      | age                          | <= 40             | -0,198216126 | 0,077053967 | -2,572432475 | 0,010098665 |   |
| 43 | Middle age      | age                          | <= 40             | -0,198216126 | 0,077053967 | -2,572432475 | 0,010098665 |   |
| 44 | Middle age      | brain_disease_caregiver      | (Intercept)       | 2,956561214  | 0,0380924   | 77,61551492  |             | 0 |
| 45 | Middle age      | brain_disease_caregiver      | Yes               | 0,431682931  | 0,062690404 | 6,885949082  | 5,74035E-12 |   |
| 46 | Middle age      | brain_research_participation | (Intercept)       | 3,117346345  | 0,039777305 | 78,36997366  |             | 0 |
| 47 | Middle age      | brain_research_participation | Yes               | 0,044761519  | 0,061194423 | 0,731464028  | 0,464495769 |   |
| 48 | Middle age      | brain_research_participation | Yes               | 0,044761519  | 0,061194423 | 0,731464028  | 0,464495769 |   |
| 49 | Middle age      | cognitive_health             | (Intercept)       | 3,167521916  | 0,031624411 | 100,1606624  |             | 0 |
| 50 | Middle age      | cognitive_health             | Below average     | -0,429265873 | 0,107920961 | -3,977594976 | 6,96158E-05 |   |
| 51 | Middle age      | cognitive_health             | Below average     | -0,429265873 | 0,107920961 | -3,977594976 | 6,96158E-05 |   |
| 52 | Middle age      | education                    | (Intercept)       | 3,161268839  | 0,036889006 | 85,69677586  |             | 0 |
| 53 | Middle age      | education                    | Lower             | -0,077262687 | 0,064359276 | -1,200490309 | 0,229948974 |   |
| 54 | Middle age      | education                    | Lower             | -0,077262687 | 0,064359276 | -1,200490309 | 0,229948974 |   |
| 55 | Middle age      | gender                       | (Intercept)       | 3,478000132  | 0,041978119 | 82,85269064  |             | 0 |
| 56 | Middle age      | gender                       | Man               | -0,889115137 | 0,061172671 | -14,53451547 | 7,32299E-48 |   |
| 57 | Middle age      | gender                       | Other/Undisclosed | -1,407527261 | 0,286704975 | -4,909322758 | 9,13915E-07 |   |
| 58 | Middle age      | healthcare_experience        | (Intercept)       | 2,990507731  | 0,036097846 | 82,84449311  |             | 0 |
| 59 | Middle age      | healthcare_experience        | Yes               | 0,427999288  | 0,066156952 | 6,46945299   | 9,83583E-11 |   |
| 60 | Middle age      | illness_experience           | (Intercept)       | 3,087407129  | 0,038268183 | 80,67817372  |             | 0 |
|    | Middle age      | illness_experience           | Yes               | 0,125939419  | 0,062408958 | 2,017970215  | 0,043594363 |   |
|    | Middle age      | illness_experience           | Yes               | 0,125939419  | 0,062408958 | 2,017970215  | 0,043594363 |   |
|    | Middle age      | mental_health                | (Intercept)       | 3,190944178  | 0,033262758 | 95,93143583  |             | 0 |
|    | Middle age      | mental_health                | Below average     | -0,358316314 | 0,079839597 | -4,487952446 | 7,1911E-06  |   |
|    | Middle age      | relationship                 | (Intercept)       | 3,077130679  | 0,044301781 | 69,45839663  |             | 0 |
|    | Middle age      | relationship                 | Stable            | 0,108556776  | 0,060601828 | 1,791311912  | 0,073243256 |   |
|    | Middle age      | relationship                 | Stable            | 0,108556776  | 0,060601828 | 1,791311912  | 0,073243256 |   |
|    | Old age         | age                          | (Intercept)       | 3,230673182  | 0,046440311 | 69,56613999  |             | 0 |
|    | Old age         | age                          | 41-60             | 0,170724983  | 0,072588749 | 2,351948267  | 0,018675372 |   |
|    | Old age         | age                          | <= 40             | -0,599477715 | 0,075618376 | -7,927672385 | 2,23291E-15 |   |
|    | Old age         | brain_disease_caregiver      | (Intercept)       | 3,015506318  | 0,039104797 | 77,11346372  |             | 0 |
|    | Old age         | brain_disease_caregiver      | Yes               | 0,343800122  | 0,062779048 | 5,476351355  | 4,34185E-08 |   |
|    | Old age         | brain_research_participation | (Intercept)       | 3,085487069  | 0,03918606  | 78,73940507  |             | 0 |
|    | Old age         | brain_research_participation | Yes               | 0,186077389  | 0,062666812 | 2,969313178  | 0,002984662 |   |
|    | Old age         | brain_research_participation | Yes               | 0,186077389  | 0,062666812 | 2,969313178  | 0,002984662 |   |
|    | Old age         | cognitive_health             | (Intercept)       | 3,192560088  | 0,031979033 | 99,83291407  |             | 0 |
|    | Old age         | cognitive_health             | Below average     | -0,423198216 | 0,109445646 | -3,866743295 | 0,000110298 |   |
|    | Old age         | cognitive_health             | Below average     | -0,423198216 | 0,109445646 | -3,866743295 | 0,000110298 |   |
|    | Old age         | education                    | (Intercept)       | 3,239202294  | 0,038230827 | 84,7274977   |             | 0 |
|    | Old age         | education                    | Lower             | -0,229215662 | 0,063709139 | -3,597845888 | 0,000320864 |   |
|    | Old age         | education                    | Lower             | -0,229215662 | 0,063709139 | -3,597845888 | 0,000320864 |   |
|    | Old age         | gender                       | (Intercept)       | 3,496244022  | 0,042330095 | 82,5947605   |             | 0 |
|    | Old age         | gender                       | Man               | -0,880226359 | 0,061778163 | -14,24817966 | 4,60119E-46 |   |
|    | Old age         | gender                       | Other/Undisclosed | -1,053896987 | 0,332396584 | -3,170601135 | 0,001521239 |   |
|    | Old age         | healthcare_experience        | (Intercept)       | 3,040986564  | 0,036912501 | 82,38364892  |             | 0 |
|    | Old age         | healthcare_experience        | Yes               | 0,347022109  | 0,065956953 | 5,261342347  | 1,43007E-07 |   |
|    | Old age         | illness_experience           | (Intercept)       | 3,122702755  | 0,038870409 | 80,33624626  |             | 0 |
|    | Old age         | illness_experience           | Yes               | 0,100409367  | 0,062955059 | 1,594937221  | 0,110726275 |   |

|    |                           |                              |                                    |              |             |              |             |
|----|---------------------------|------------------------------|------------------------------------|--------------|-------------|--------------|-------------|
| 1  |                           |                              |                                    |              |             |              |             |
| 2  |                           |                              |                                    |              |             |              |             |
| 3  |                           |                              |                                    |              |             |              |             |
| 4  | Old age                   | mental_health                | (Intercept)                        | 3,228956997  | 0,033836848 | 95,4272397   | 0           |
| 5  | Old age                   | mental_health                | Below average                      | -0,428381929 | 0,079179857 | -5,410238766 | 6,29408E-08 |
| 6  | Old age                   | relationship                 | (Intercept)                        | 3,060386102  | 0,043948762 | 69,63532027  | 0           |
| 7  | Old age                   | relationship                 | Stable                             | 0,189216958  | 0,061191416 | 3,092214069  | 0,001986695 |
| 8  |                           |                              |                                    |              |             |              |             |
| 9  |                           |                              |                                    |              |             |              |             |
| 10 | <b>QUESTION 2_ORDINAL</b> |                              |                                    |              |             |              |             |
| 11 | key                       | fct                          | term                               | estimate     | std.error   | statistic    | coef.type   |
| 12 | In the womb               | age                          | 41-60                              | -0,361691862 | 0,025715289 | -14,06524582 | coefficient |
| 13 | In the womb               | age                          | <= 40                              | -0,406382649 | 0,034088646 | -11,92134892 | coefficient |
| 14 | In the womb               | age                          | Very important Important           | -0,009201356 | 0,017415583 | -0,528340395 | scale       |
| 15 | In the womb               | age                          | Important Moderately important     | 1,442703096  | 0,020117285 | 71,71460174  | scale       |
| 16 | In the womb               | age                          | Moderately important Not important | 2,817648667  | 0,030724326 | 91,70741976  | scale       |
| 17 | In the womb               | brain_disease_caregiver      | Yes                                | -0,167373919 | 0,023418818 | -7,146983982 | coefficient |
| 18 | In the womb               | brain_disease_caregiver      | Very important Important           | 0,114716608  | 0,016293236 | 7,040750326  | scale       |
| 19 | In the womb               | brain_disease_caregiver      | Important Moderately important     | 1,559034883  | 0,019449168 | 80,15946578  | scale       |
| 20 | In the womb               | brain_disease_caregiver      | Moderately important Not important | 2,93067556   | 0,030358118 | 96,53679999  | scale       |
| 21 | In the womb               | brain_research_participation | Yes                                | -0,019627066 | 0,023556447 | -0,833192947 | coefficient |
| 22 | In the womb               | brain_research_participation | Very important Important           | 0,184307912  | 0,015824451 | 11,6470338   | scale       |
| 23 | In the womb               | brain_research_participation | Important Moderately important     | 1,626637222  | 0,019243897 | 84,52743378  | scale       |
| 24 | In the womb               | brain_research_participation | Moderately important Not important | 2,997081174  | 0,030300552 | 98,91176781  | scale       |
| 25 | In the womb               | cognitive_health             | Below average                      | 0,390024168  | 0,048508455 | 8,040333703  | coefficient |
| 26 | In the womb               | cognitive_health             | Very important Important           | 0,215446239  | 0,012518392 | 17,21037707  | scale       |
| 27 | In the womb               | cognitive_health             | Important Moderately important     | 1,660069628  | 0,016730747 | 99,22268351  | scale       |
| 28 | In the womb               | cognitive_health             | Moderately important Not important | 3,032395238  | 0,028800672 | 105,2890434  | scale       |
| 29 | In the womb               | education                    | Lower                              | 0,474599525  | 0,02491664  | 19,04749301  | coefficient |
| 30 | In the womb               | education                    | Very important Important           | 0,34141708   | 0,014620039 | 23,35267988  | scale       |
| 31 | In the womb               | education                    | Important Moderately important     | 1,797810041  | 0,018750184 | 95,8822611   | scale       |
| 32 | In the womb               | education                    | Moderately important Not important | 3,175456938  | 0,030134975 | 105,3744685  | scale       |
| 33 | In the womb               | gender                       | Man                                | 0,44870566   | 0,025674052 | 17,47701006  | coefficient |
| 34 | In the womb               | gender                       | Other/Undisclosed                  | -0,039011404 | 0,175389372 | -0,222427413 | coefficient |
| 35 | In the womb               | gender                       | Very important Important           | 0,318555996  | 0,014322506 | 22,24163847  | scale       |
| 36 | In the womb               | gender                       | Important Moderately important     | 1,772647338  | 0,01844673  | 96,09547581  | scale       |
| 37 | In the womb               | gender                       | Moderately important Not important | 3,149986365  | 0,029939928 | 105,2102199  | scale       |
| 38 | In the womb               | healthcare_experience        | Yes                                | -0,528602187 | 0,024474104 | -21,5984288  | coefficient |
| 39 | In the womb               | healthcare_experience        | Very important Important           | -0,010160841 | 0,015244734 | -0,666514828 | scale       |
| 40 | In the womb               | healthcare_experience        | Important Moderately important     | 1,449644046  | 0,018301055 | 79,21095381  | scale       |
| 41 | In the womb               | healthcare_experience        | Moderately important Not important | 2,8285668    | 0,029581208 | 95,62039531  | scale       |
| 42 | In the womb               | illness_experience           | Yes                                | -0,020524112 | 0,023807941 | -0,862070017 | coefficient |
| 43 | In the womb               | illness_experience           | Very important Important           | 0,184523814  | 0,015451361 | 11,94223713  | scale       |
| 44 | In the womb               | illness_experience           | Important Moderately important     | 1,62689522   | 0,018916449 | 86,00426063  | scale       |
| 45 | In the womb               | illness_experience           | Moderately important Not important | 2,997337634  | 0,030092914 | 99,60277092  | scale       |
| 46 | In the womb               | mental_health                | Below average                      | 0,007658438  | 0,03475223  | 0,220372572  | coefficient |
| 47 | In the womb               | mental_health                | Very important Important           | 0,193739738  | 0,01297179  | 14,93546657  | scale       |
| 48 | In the womb               | mental_health                | Important Moderately important     | 1,636054549  | 0,016996402 | 96,25887535  | scale       |
| 49 | In the womb               | mental_health                | Moderately important Not important | 3,006554451  | 0,028930129 | 103,9246822  | scale       |
| 50 | In the womb               | relationship                 | Stable                             | -0,041061459 | 0,023468372 | -1,749650929 | coefficient |
| 51 | In the womb               | relationship                 | Very important Important           | 0,169814038  | 0,017868975 | 9,503289393  | scale       |
| 52 | In the womb               | relationship                 | Important Moderately important     | 1,612290643  | 0,020900663 | 77,14064542  | scale       |
| 53 | In the womb               | relationship                 | Moderately important Not important | 2,982829609  | 0,031354069 | 95,13373091  | scale       |
| 54 | Childhood                 | age                          | 41-60                              | -0,418631069 | 0,029185124 | -14,34398802 | coefficient |
| 55 | Childhood                 | age                          | <= 40                              | -0,752336995 | 0,042031501 | -17,89936057 | coefficient |
| 56 | Childhood                 | age                          | Very important Important           | 0,667291977  | 0,018716108 | 35,65335131  | scale       |
| 57 | Childhood                 | age                          | Important Moderately important     | 2,681647224  | 0,030052399 | 89,23238465  | scale       |
| 58 | Childhood                 | age                          | Moderately important Not important | 4,827745826  | 0,077627495 | 62,19118381  | scale       |
| 59 | Childhood                 | brain_disease_caregiver      | Yes                                | 0,023579084  | 0,026658752 | 0,884478142  | coefficient |
| 60 | Childhood                 | brain_disease_caregiver      | Very important Important           | 0,94138807   | 0,018321756 | 51,38088554  | scale       |
|    | Childhood                 | brain_disease_caregiver      | Important Moderately important     | 2,93896335   | 0,030232158 | 97,21315012  | scale       |
|    | Childhood                 | brain_disease_caregiver      | Moderately important Not important | 5,081656354  | 0,077728472 | 65,37702589  | scale       |
|    | Childhood                 | brain_research_participation | Yes                                | 0,079296264  | 0,026794387 | 2,959435625  | coefficient |
|    | Childhood                 | brain_research_participation | Very important Important           | 0,964989011  | 0,017874119 | 53,98806     | scale       |
|    | Childhood                 | brain_research_participation | Important Moderately important     | 2,962918794  | 0,030002944 | 98,75426888  | scale       |
|    | Childhood                 | brain_research_participation | Moderately important Not important | 5,105677618  | 0,077644237 | 65,75732878  | scale       |
|    | Childhood                 | cognitive_health             | Below average                      | 0,344188955  | 0,053129756 | 6,478270917  | coefficient |
|    | Childhood                 | cognitive_health             | Very important Important           | 0,952025768  | 0,013883447 | 68,57272214  | scale       |
|    | Childhood                 | cognitive_health             | Important Moderately important     | 2,951224298  | 0,027791605 | 106,1912133  | scale       |
|    | Childhood                 | cognitive_health             | Moderately important Not important | 5,094674477  | 0,07682051  | 66,31919631  | scale       |
|    | Childhood                 | education                    | Lower                              | 0,395243416  | 0,027996741 | 14,11747971  | coefficient |
|    | Childhood                 | education                    | Very important Important           | 1,060357433  | 0,016606643 | 63,85140358  | scale       |
|    | Childhood                 | education                    | Important Moderately important     | 3,06623573   | 0,029464249 | 104,0663119  | scale       |
|    | Childhood                 | education                    | Moderately important Not important | 5,211367826  | 0,077462045 | 67,27640352  | scale       |

|    |                 |                              |                                    |              |             |              |             |
|----|-----------------|------------------------------|------------------------------------|--------------|-------------|--------------|-------------|
| 1  |                 |                              |                                    |              |             |              |             |
| 2  |                 |                              |                                    |              |             |              |             |
| 3  |                 |                              |                                    |              |             |              |             |
| 4  | Childhood       | gender                       | Man                                | 0,296614994  | 0,028892364 | 10,26620721  | coefficient |
| 5  | Childhood       | gender                       | Other/Undisclosed                  | -0,256885107 | 0,217406583 | -1,181588452 | coefficient |
| 6  | Childhood       | gender                       | Very important Important           | 1,01632142   | 0,016135038 | 62,98847341  | scale       |
| 7  | Childhood       | gender                       | Important Moderately important     | 3,018340358  | 0,029107275 | 103,6971126  | scale       |
| 8  | Childhood       | gender                       | Moderately important Not important | 5,162673628  | 0,077321452 | 66,76896889  | scale       |
| 9  | Childhood       | healthcare_experience        | Yes                                | -0,401656409 | 0,028097    | -14,29534876 | coefficient |
| 10 | Childhood       | healthcare_experience        | Very important Important           | 0,782526525  | 0,016600794 | 47,13789806  | scale       |
| 11 | Childhood       | healthcare_experience        | Important Moderately important     | 2,788235006  | 0,028976477 | 96,22408458  | scale       |
| 12 | Childhood       | healthcare_experience        | Moderately important Not important | 4,933533131  | 0,077226031 | 63,88432839  | scale       |
| 13 | Childhood       | illness_experience           | Yes                                | -0,010198882 | 0,027140864 | -0,375775897 | coefficient |
| 14 | Childhood       | illness_experience           | Very important Important           | 0,926283784  | 0,017275678 | 53,61779735  | scale       |
| 15 | Childhood       | illness_experience           | Important Moderately important     | 2,923841235  | 0,029576807 | 98,85587851  | scale       |
| 16 | Childhood       | illness_experience           | Moderately important Not important | 5,066530371  | 0,077479969 | 65,39148697  | scale       |
| 17 | Childhood       | mental_health                | Below average                      | -0,128432597 | 0,040390451 | -3,179776233 | coefficient |
| 18 | Childhood       | mental_health                | Very important Important           | 0,914003846  | 0,014320229 | 63,82606563  | scale       |
| 19 | Childhood       | mental_health                | Important Moderately important     | 2,911997414  | 0,027935775 | 104,2390045  | scale       |
| 20 | Childhood       | mental_health                | Moderately important Not important | 5,054672906  | 0,076865329 | 65,76011518  | scale       |
| 21 | Childhood       | relationship                 | Stable                             | 0,054568991  | 0,026832652 | 2,033678657  | coefficient |
| 22 | Childhood       | relationship                 | Very important Important           | 0,961020362  | 0,020231649 | 47,5008429   | scale       |
| 23 | Childhood       | relationship                 | Important Moderately important     | 2,958776728  | 0,031452298 | 94,07187678  | scale       |
| 24 | Childhood       | relationship                 | Moderately important Not important | 5,101542631  | 0,078218347 | 65,22181592  | scale       |
| 25 | Adolescence     | age                          | 41-60                              | -0,383645269 | 0,028806161 | -13,31816734 | coefficient |
| 26 | Adolescence     | age                          | <= 40                              | -0,658566254 | 0,040511057 | -16,25645683 | coefficient |
| 27 | Adolescence     | age                          | Very important Important           | 0,615300528  | 0,018581975 | 33,11276206  | scale       |
| 28 | Adolescence     | age                          | Important Moderately important     | 3,119665369  | 0,035397901 | 88,13136512  | scale       |
| 29 | Adolescence     | age                          | Moderately important Not important | 5,563271792  | 0,109926081 | 50,60920704  | scale       |
| 30 | Adolescence     | brain_disease_caregiver      | Yes                                | -0,01694158  | 0,026303989 | -0,644068851 | coefficient |
| 31 | Adolescence     | brain_disease_caregiver      | Very important Important           | 0,846800509  | 0,017960253 | 47,14858415  | scale       |
| 32 | Adolescence     | brain_disease_caregiver      | Important Moderately important     | 3,335615835  | 0,035423704 | 94,16338316  | scale       |
| 33 | Adolescence     | brain_disease_caregiver      | Moderately important Not important | 5,776984547  | 0,10994961  | 52,54211053  | scale       |
| 34 | Adolescence     | brain_research_participation | Yes                                | -0,007883581 | 0,026487429 | -0,297634803 | coefficient |
| 35 | Adolescence     | brain_research_participation | Very important Important           | 0,85126131   | 0,017446545 | 48,79254488  | scale       |
| 36 | Adolescence     | brain_research_participation | Important Moderately important     | 3,340059239  | 0,035171749 | 94,96426462  | scale       |
| 37 | Adolescence     | brain_research_participation | Moderately important Not important | 5,78142474   | 0,109869655 | 52,62075979  | scale       |
| 38 | Adolescence     | cognitive_health             | Below average                      | 0,266423493  | 0,053360776 | 4,992871403  | coefficient |
| 39 | Adolescence     | cognitive_health             | Very important Important           | 0,871057586  | 0,013644994 | 63,83715588  | scale       |
| 40 | Adolescence     | cognitive_health             | Important Moderately important     | 3,360959673  | 0,033488532 | 100,3615099  | scale       |
| 41 | Adolescence     | cognitive_health             | Moderately important Not important | 5,802783094  | 0,109344304 | 53,0689107   | scale       |
| 42 | Adolescence     | education                    | Lower                              | 0,232363359  | 0,027871682 | 8,336897737  | coefficient |
| 43 | Adolescence     | education                    | Very important Important           | 0,929384112  | 0,016129814 | 57,61902167  | scale       |
| 44 | Adolescence     | education                    | Important Moderately important     | 3,421329562  | 0,034678519 | 98,65846707  | scale       |
| 45 | Adolescence     | education                    | Moderately important Not important | 5,863391004  | 0,109720348 | 53,43941302  | scale       |
| 46 | Adolescence     | gender                       | Man                                | 0,341088329  | 0,028407483 | 12,00698868  | coefficient |
| 47 | Adolescence     | gender                       | Other/Undisclosed                  | -0,311085428 | 0,217874592 | -1,427818752 | coefficient |
| 48 | Adolescence     | gender                       | Very important Important           | 0,954621377  | 0,015945527 | 59,86765904  | scale       |
| 49 | Adolescence     | gender                       | Important Moderately important     | 3,450299836  | 0,034654183 | 99,56373476  | scale       |
| 50 | Adolescence     | gender                       | Moderately important Not important | 5,892615278  | 0,109712799 | 53,70946095  | scale       |
| 51 | Adolescence     | healthcare_experience        | Yes                                | -0,351925953 | 0,027556514 | -12,77106214 | coefficient |
| 52 | Adolescence     | healthcare_experience        | Very important Important           | 0,72432645   | 0,016416234 | 44,12257053  | scale       |
| 53 | Adolescence     | healthcare_experience        | Important Moderately important     | 3,220353108  | 0,034487536 | 93,37730374  | scale       |
| 54 | Adolescence     | healthcare_experience        | Moderately important Not important | 5,663047223  | 0,109642245 | 51,65023068  | scale       |
| 55 | Adolescence     | illness_experience           | Yes                                | -0,041653507 | 0,026787565 | -1,554956844 | coefficient |
| 56 | Adolescence     | illness_experience           | Very important Important           | 0,837955823  | 0,016983585 | 49,33915998  | scale       |
| 57 | Adolescence     | illness_experience           | Important Moderately important     | 3,326864116  | 0,034921156 | 95,26787036  | scale       |
| 58 | Adolescence     | illness_experience           | Moderately important Not important | 5,768229394  | 0,109788758 | 52,53934447  | scale       |
| 59 | Adolescence     | mental_health                | Below average                      | -0,12165802  | 0,039681324 | -3,065876045 | coefficient |
| 60 | Adolescence     | mental_health                | Very important Important           | 0,839076619  | 0,014104134 | 59,49153813  | scale       |
|    | Adolescence     | mental_health                | Important Moderately important     | 3,328285947  | 0,03362037  | 98,99611344  | scale       |
|    | Adolescence     | mental_health                | Moderately important Not important | 5,769603255  | 0,109382322 | 52,74712714  | scale       |
|    | Adolescence     | relationship                 | Stable                             | 0,099613435  | 0,026493839 | 3,759871728  | coefficient |
|    | Adolescence     | relationship                 | Very important Important           | 0,910818094  | 0,020038035 | 45,45446096  | scale       |
|    | Adolescence     | relationship                 | Important Moderately important     | 3,400402674  | 0,036622471 | 92,85017116  | scale       |
|    | Adolescence     | relationship                 | Moderately important Not important | 5,841909555  | 0,110347592 | 52,94097909  | scale       |
|    | Young adulthood | age                          | 41-60                              | -0,238983429 | 0,026700893 | -8,95039099  | coefficient |
|    | Young adulthood | age                          | <= 40                              | -0,259551263 | 0,035337598 | -7,344904022 | coefficient |
|    | Young adulthood | age                          | Very important Important           | 0,249436626  | 0,017812232 | 14,00367054  | scale       |
|    | Young adulthood | age                          | Important Moderately important     | 2,910661088  | 0,031347258 | 92,85217555  | scale       |
|    | Young adulthood | age                          | Moderately important Not important | 6,220468976  | 0,144963618 | 42,91055278  | scale       |
|    | Young adulthood | brain_disease_caregiver      | Yes                                | -0,180307795 | 0,024394234 | -7,391410533 | coefficient |
|    | Young adulthood | brain_disease_caregiver      | Very important Important           | 0,297385815  | 0,016597701 | 17,91729011  | scale       |



|    |                 |                              |                                      |              |             |              |             |
|----|-----------------|------------------------------|--------------------------------------|--------------|-------------|--------------|-------------|
| 1  |                 |                              |                                      |              |             |              |             |
| 2  |                 |                              |                                      |              |             |              |             |
| 3  |                 |                              |                                      |              |             |              |             |
| 4  | Young adulthood | brain_disease_caregiver      | Important   Moderately important     | 2,95626733   | 0,030785708 | 96,02726414  | scale       |
| 5  | Young adulthood | brain_disease_caregiver      | Moderately important   Not important | 6,265601817  | 0,144854132 | 43,25456039  | scale       |
| 6  | Young adulthood | brain_research_participation | Yes                                  | -0,079756439 | 0,024541456 | -3,249865778 | coefficient |
| 7  | Young adulthood | brain_research_participation | Very important   Important           | 0,346326458  | 0,016164573 | 21,42503035  | scale       |
| 8  | Young adulthood | brain_research_participation | Important   Moderately important     | 3,002720879  | 0,030663048 | 97,92636539  | scale       |
| 9  | Young adulthood | brain_research_participation | Moderately important   Not important | 6,312051002  | 0,144857119 | 43,57432373  | scale       |
| 10 | Young adulthood | cognitive_health             | Below average                        | 0,153118787  | 0,050744183 | 3,01746481   | coefficient |
| 11 | Young adulthood | cognitive_health             | Very important   Important           | 0,389713837  | 0,0126827   | 30,72798708  | scale       |
| 12 | Young adulthood | cognitive_health             | Important   Moderately important     | 3,046038678  | 0,029086688 | 104,7227752  | scale       |
| 13 | Young adulthood | cognitive_health             | Moderately important   Not important | 6,35510014   | 0,144505555 | 43,97824111  | scale       |
| 14 | Young adulthood | education                    | Lower                                | 0,054788012  | 0,026086194 | 2,100268544  | coefficient |
| 15 | Young adulthood | education                    | Very important   Important           | 0,397830978  | 0,014815349 | 26,85262235  | scale       |
| 16 | Young adulthood | education                    | Important   Moderately important     | 3,053873203  | 0,030093516 | 101,4794416  | scale       |
| 17 | Young adulthood | education                    | Moderately important   Not important | 6,362682932  | 0,144708137 | 43,9690751   | scale       |
| 18 | Young adulthood | gender                       | Man                                  | 0,407119412  | 0,026647287 | 15,278081    | coefficient |
| 19 | Young adulthood | gender                       | Other/Undisclosed                    | 0,10837072   | 0,18317134  | 0,591635785  | coefficient |
| 20 | Young adulthood | gender                       | Very important   Important           | 0,498345999  | 0,014689667 | 33,92493521  | scale       |
| 21 | Young adulthood | gender                       | Important   Moderately important     | 3,167640248  | 0,030341921 | 104,3981446  | scale       |
| 22 | Young adulthood | gender                       | Moderately important   Not important | 6,479499166  | 0,144801566 | 44,74743853  | scale       |
| 23 | Young adulthood | healthcare_experience        | Yes                                  | -0,315917135 | 0,02522423  | -12,52435195 | coefficient |
| 24 | Young adulthood | healthcare_experience        | Very important   Important           | 0,260511267  | 0,015484808 | 16,82366743  | scale       |
| 25 | Young adulthood | healthcare_experience        | Important   Moderately important     | 2,924511517  | 0,030132138 | 97,05622454  | scale       |
| 26 | Young adulthood | healthcare_experience        | Moderately important   Not important | 6,235075807  | 0,144726913 | 43,08166097  | scale       |
| 27 | Young adulthood | illness_experience           | Yes                                  | -0,113594768 | 0,024813901 | -4,577868119 | coefficient |
| 28 | Young adulthood | illness_experience           | Very important   Important           | 0,335043413  | 0,015775026 | 21,23885074  | scale       |
| 29 | Young adulthood | illness_experience           | Important   Moderately important     | 2,99202104   | 0,030432945 | 98,31519915  | scale       |
| 30 | Young adulthood | illness_experience           | Moderately important   Not important | 6,301343254  | 0,144795431 | 43,51893717  | scale       |
| 31 | Young adulthood | mental_health                | Below average                        | 0,007416794  | 0,03597031  | 0,206192109  | coefficient |
| 32 | Young adulthood | mental_health                | Very important   Important           | 0,381524232  | 0,013173152 | 28,96225903  | scale       |
| 33 | Young adulthood | mental_health                | Important   Moderately important     | 3,0373811    | 0,029281641 | 103,7298805  | scale       |
| 34 | Young adulthood | mental_health                | Moderately important   Not important | 6,346198272  | 0,144541823 | 43,90561957  | scale       |
| 35 | Young adulthood | relationship                 | Stable                               | 0,026014673  | 0,024456382 | 1,063717172  | coefficient |
| 36 | Young adulthood | relationship                 | Very important   Important           | 0,395136984  | 0,018433383 | 21,43594534  | scale       |
| 37 | Young adulthood | relationship                 | Important   Moderately important     | 3,051092131  | 0,032025933 | 95,2694211   | scale       |
| 38 | Young adulthood | relationship                 | Moderately important   Not important | 6,360978049  | 0,145178488 | 43,81488013  | scale       |
| 39 | Middle age      | age                          | 41-60                                | -0,352979719 | 0,027811125 | -12,69203294 | coefficient |
| 40 | Middle age      | age                          | <= 40                                | 0,01111535   | 0,035339576 | 0,3145298    | coefficient |
| 41 | Middle age      | age                          | Very important   Important           | 0,46019913   | 0,018140027 | 25,36926406  | scale       |
| 42 | Middle age      | age                          | Important   Moderately important     | 3,018383567  | 0,032707031 | 92,28546485  | scale       |
| 43 | Middle age      | age                          | Moderately important   Not important | 6,230173595  | 0,144998356 | 42,96720167  | scale       |
| 44 | Middle age      | brain_disease_caregiver      | Yes                                  | -0,324979581 | 0,025199774 | -12,89613069 | coefficient |
| 45 | Middle age      | brain_disease_caregiver      | Very important   Important           | 0,439351277  | 0,016842115 | 26,08646743  | scale       |
| 46 | Middle age      | brain_disease_caregiver      | Important   Moderately important     | 2,996844684  | 0,031950765 | 93,79570927  | scale       |
| 47 | Middle age      | brain_disease_caregiver      | Moderately important   Not important | 6,208288432  | 0,144826432 | 42,86709498  | scale       |
| 48 | Middle age      | brain_research_participation | Yes                                  | -0,113689019 | 0,025255933 | -4,50147764  | coefficient |
| 49 | Middle age      | brain_research_participation | Very important   Important           | 0,538481492  | 0,016529842 | 32,57632497  | scale       |
| 50 | Middle age      | brain_research_participation | Important   Moderately important     | 3,088823252  | 0,031970853 | 96,61372561  | scale       |
| 51 | Middle age      | brain_research_participation | Moderately important   Not important | 6,298978955  | 0,144837782 | 43,48988834  | scale       |
| 52 | Middle age      | cognitive_health             | Below average                        | 0,154134041  | 0,051817221 | 2,974571728  | coefficient |
| 53 | Middle age      | cognitive_health             | Very important   Important           | 0,596424107  | 0,012997954 | 45,88599814  | scale       |
| 54 | Middle age      | cognitive_health             | Important   Moderately important     | 3,146222183  | 0,030417899 | 103,4332495  | scale       |
| 55 | Middle age      | cognitive_health             | Moderately important   Not important | 6,356526995  | 0,144506397 | 43,98785897  | scale       |
| 56 | Middle age      | education                    | Lower                                | 0,039460832  | 0,026840256 | 1,470210689  | coefficient |
| 57 | Middle age      | education                    | Very important   Important           | 0,599517101  | 0,015177008 | 39,50166547  | scale       |
| 58 | Middle age      | education                    | Important   Moderately important     | 3,14897335   | 0,031413668 | 100,2421411  | scale       |
| 59 | Middle age      | education                    | Moderately important   Not important | 6,35910158   | 0,144718051 | 43,94131575  | scale       |
| 60 | Middle age      | gender                       | Man                                  | 0,537571684  | 0,027160289 | 19,79256093  | coefficient |
|    | Middle age      | gender                       | Other/Undisclosed                    | 0,474611642  | 0,183740828 | 2,58304943   | coefficient |
|    | Middle age      | gender                       | Very important   Important           | 0,746992093  | 0,015235908 | 49,02839364  | scale       |
|    | Middle age      | gender                       | Important   Moderately important     | 3,316886293  | 0,031845399 | 104,1559023  | scale       |
|    | Middle age      | gender                       | Moderately important   Not important | 6,531842784  | 0,144828547 | 45,10052011  | scale       |
|    | Middle age      | healthcare_experience        | Yes                                  | -0,228059346 | 0,025868219 | -8,816198206 | coefficient |
|    | Middle age      | healthcare_experience        | Very important   Important           | 0,500466887  | 0,015855515 | 31,56421431  | scale       |
|    | Middle age      | healthcare_experience        | Important   Moderately important     | 3,053572235  | 0,031559691 | 96,75545342  | scale       |
|    | Middle age      | healthcare_experience        | Moderately important   Not important | 6,264524714  | 0,144742106 | 43,28059681  | scale       |
|    | Middle age      | illness_experience           | Yes                                  | -0,061342436 | 0,025468874 | -2,408525638 | coefficient |
|    | Middle age      | illness_experience           | Very important   Important           | 0,562470794  | 0,016197899 | 34,72492372  | scale       |
|    | Middle age      | illness_experience           | Important   Moderately important     | 3,112116848  | 0,031845171 | 97,72649205  | scale       |
|    | Middle age      | illness_experience           | Moderately important   Not important | 6,32229287   | 0,144808904 | 43,65955891  | scale       |
|    | Middle age      | mental_health                | Below average                        | 0,058553432  | 0,036814132 | 1,590515079  | coefficient |

|    |            |                              |                                    |              |             |                          |
|----|------------|------------------------------|------------------------------------|--------------|-------------|--------------------------|
| 1  |            |                              |                                    |              |             |                          |
| 2  |            |                              |                                    |              |             |                          |
| 3  |            |                              |                                    |              |             |                          |
| 4  | Middle age | mental_health                | Very important Important           | 0,594807648  | 0,013505608 | 44,04152975 scale        |
| 5  | Middle age | mental_health                | Important Moderately important     | 3,144289506  | 0,030633529 | 102,6420908 scale        |
| 6  | Middle age | mental_health                | Moderately important Not important | 6,354516795  | 0,144552868 | 43,95981122 scale        |
| 7  | Middle age | relationship                 | Stable                             | -0,057525546 | 0,025099141 | -2,291932845 coefficient |
| 8  | Middle age | relationship                 | Very important Important           | 0,555066431  | 0,018790469 | 29,53978518 scale        |
| 9  | Middle age | relationship                 | Important Moderately important     | 3,104843248  | 0,033228744 | 93,43847818 scale        |
| 10 | Middle age | relationship                 | Moderately important Not important | 6,315710697  | 0,145156469 | 43,50967447 scale        |
| 11 | Middle age | relationship                 | Moderately important Not important | 6,315710697  | 0,145156469 | 43,50967447 scale        |
| 12 | Old age    | age                          | 41-60                              | -0,021727343 | 0,029939389 | -0,725710963 coefficient |
| 13 | Old age    | age                          | <= 40                              | 0,295477613  | 0,037592159 | 7,860086263 coefficient  |
| 14 | Old age    | age                          | Very important Important           | 1,023327119  | 0,020066066 | 50,99789553 scale        |
| 15 | Old age    | age                          | Important Moderately important     | 3,207321224  | 0,034050783 | 94,19229092 scale        |
| 16 | Old age    | age                          | Important Moderately important     | 3,207321224  | 0,034050783 | 94,19229092 scale        |
| 17 | Old age    | age                          | Moderately important Not important | 5,628322884  | 0,099858163 | 56,36317261 scale        |
| 18 | Old age    | brain_disease_caregiver      | Yes                                | -0,256458572 | 0,02720214  | -9,427882055 coefficient |
| 19 | Old age    | brain_disease_caregiver      | Very important Important           | 0,865516115  | 0,018032573 | 47,99737325 scale        |
| 20 | Old age    | brain_disease_caregiver      | Important Moderately important     | 3,049992328  | 0,032635112 | 93,45738743 scale        |
| 21 | Old age    | brain_disease_caregiver      | Important Moderately important     | 3,049992328  | 0,032635112 | 93,45738743 scale        |
| 22 | Old age    | brain_disease_caregiver      | Moderately important Not important | 5,470366825  | 0,099364903 | 55,05331034 scale        |
| 23 | Old age    | brain_research_participation | Yes                                | -0,189593987 | 0,027401831 | -6,919026116 coefficient |
| 24 | Old age    | brain_research_participation | Very important Important           | 0,901338789  | 0,017626618 | 51,13509625 scale        |
| 25 | Old age    | brain_research_participation | Important Moderately important     | 3,084060094  | 0,032467346 | 94,98959569 scale        |
| 26 | Old age    | brain_research_participation | Important Moderately important     | 3,084060094  | 0,032467346 | 94,98959569 scale        |
| 27 | Old age    | brain_research_participation | Moderately important Not important | 5,503962443  | 0,099314872 | 55,41931754 scale        |
| 28 | Old age    | cognitive_health             | Below average                      | 0,153497159  | 0,055401334 | 2,770640152 coefficient  |
| 29 | Old age    | cognitive_health             | Very important Important           | 0,99067388   | 0,0139967   | 70,77910192 scale        |
| 30 | Old age    | cognitive_health             | Important Moderately important     | 3,171749654  | 0,030790827 | 103,009562 scale         |
| 31 | Old age    | cognitive_health             | Important Moderately important     | 3,171749654  | 0,030790827 | 103,009562 scale         |
| 32 | Old age    | cognitive_health             | Moderately important Not important | 5,591509612  | 0,098787988 | 56,60110839 scale        |
| 33 | Old age    | education                    | Lower                              | 0,141255164  | 0,028722229 | 4,91797361 coefficient   |
| 34 | Old age    | education                    | Very important Important           | 1,026408554  | 0,016483813 | 62,26766662 scale        |
| 35 | Old age    | education                    | Important Moderately important     | 3,208144559  | 0,032055907 | 100,0796692 scale        |
| 36 | Old age    | education                    | Important Moderately important     | 3,208144559  | 0,032055907 | 100,0796692 scale        |
| 37 | Old age    | education                    | Moderately important Not important | 5,628007906  | 0,099193229 | 56,73782347 scale        |
| 38 | Old age    | gender                       | Man                                | 0,413094405  | 0,029069004 | 14,21082091 coefficient  |
| 39 | Old age    | gender                       | Other/Undisclosed                  | 0,502331525  | 0,188021523 | 2,671670332 coefficient  |
| 40 | Old age    | gender                       | Very important Important           | 1,106491822  | 0,016467961 | 67,19057753 scale        |
| 41 | Old age    | gender                       | Important Moderately important     | 3,29634377   | 0,032222834 | 102,2983829 scale        |
| 42 | Old age    | gender                       | Important Moderately important     | 3,29634377   | 0,032222834 | 102,2983829 scale        |
| 43 | Old age    | gender                       | Moderately important Not important | 5,719326333  | 0,099269468 | 57,61415315 scale        |
| 44 | Old age    | healthcare_experience        | Yes                                | -0,131674493 | 0,027861219 | -4,726085144 coefficient |
| 45 | Old age    | healthcare_experience        | Very important Important           | 0,931197232  | 0,01708625  | 54,49980223 scale        |
| 46 | Old age    | healthcare_experience        | Important Moderately important     | 3,112881263  | 0,032220965 | 96,61042948 scale        |
| 47 | Old age    | healthcare_experience        | Important Moderately important     | 3,112881263  | 0,032220965 | 96,61042948 scale        |
| 48 | Old age    | healthcare_experience        | Moderately important Not important | 5,532845065  | 0,099231717 | 55,75682064 scale        |
| 49 | Old age    | illness_experience           | Yes                                | -0,040487486 | 0,027499683 | -1,472289188 coefficient |
| 50 | Old age    | illness_experience           | Very important Important           | 0,965057434  | 0,017443171 | 55,32580199 scale        |
| 51 | Old age    | illness_experience           | Important Moderately important     | 3,145922218  | 0,032460379 | 96,91575857 scale        |
| 52 | Old age    | illness_experience           | Important Moderately important     | 3,145922218  | 0,032460379 | 96,91575857 scale        |
| 53 | Old age    | illness_experience           | Moderately important Not important | 5,565545184  | 0,099315579 | 56,03899475 scale        |
| 54 | Old age    | mental_health                | Below average                      | 0,111171164  | 0,039323923 | 2,827061888 coefficient  |
| 55 | Old age    | mental_health                | Very important Important           | 0,996057058  | 0,014565672 | 68,38387032 scale        |
| 56 | Old age    | mental_health                | Important Moderately important     | 3,177127056  | 0,031061061 | 102,2864947 scale        |
| 57 | Old age    | mental_health                | Important Moderately important     | 3,177127056  | 0,031061061 | 102,2864947 scale        |
| 58 | Old age    | mental_health                | Moderately important Not important | 5,596955581  | 0,098875083 | 56,60632986 scale        |
| 59 | Old age    | relationship                 | Stable                             | -0,076444554 | 0,02707917  | -2,823002112 coefficient |
| 60 | Old age    | relationship                 | Very important Important           | 0,938819987  | 0,020168566 | 46,54867284 scale        |
| 60 | Old age    | relationship                 | Important Moderately important     | 3,119913392  | 0,033969059 | 91,84573992 scale        |
|    | Old age    | relationship                 | Moderately important Not important | 5,539636437  | 0,099814075 | 55,49955181 scale        |

| SUPPLEMENTARY MATERIAL 1. Demographic characteristics across countries |               |                |                |                |              |                |              |                |              |                |              |                |              |                |            |                |              |                |
|------------------------------------------------------------------------|---------------|----------------|----------------|----------------|--------------|----------------|--------------|----------------|--------------|----------------|--------------|----------------|--------------|----------------|------------|----------------|--------------|----------------|
| Respondents                                                            | All countries | %              | United Kingdom | %              | Netherlands  | %              | Norway       | %              | Spain        | %              | Denmark      | %              | Germany      | %              | Sweden     | %              | Other        | %              |
| Women                                                                  | 19,626        | 71.1 %         | 7,536          | 74.2 %         | 5,304        | 75.5 %         | 2,934        | 82.7 %         | 890          | 42.5 %         | 703          | 63.9 %         | 441          | 41.6 %         | 648        | 85.3 %         | 1,170        | 63.5 %         |
| Men                                                                    | 7,833         | 28.4 %         | 2,591          | 25.5 %         | 1,698        | 24.2 %         | 602          | 17.0 %         | 1,195        | 57.0 %         | 394          | 35.8 %         | 598          | 56.4 %         | 106        | 13.9 %         | 649          | 35.2 %         |
| Other                                                                  | 131           | 0.5 %          | 33             | 0.3 %          | 21           | 0.3 %          | 13           | 0.4 %          | 10           | 0.5 %          | 4            | 0.4 %          | 21           | 2.0 %          | 6          | 0.8 %          | 23           | 1.2 %          |
| <b>Total</b>                                                           | <b>27,590</b> | <b>100.0 %</b> | <b>10,160</b>  | <b>100.0 %</b> | <b>7,023</b> | <b>100.0 %</b> | <b>3,549</b> | <b>100.0 %</b> | <b>2,095</b> | <b>100.0 %</b> | <b>1,101</b> | <b>100.0 %</b> | <b>1,060</b> | <b>100.0 %</b> | <b>760</b> | <b>100.0 %</b> | <b>1,842</b> | <b>100.0 %</b> |
| <b>Age range (years)</b>                                               |               |                |                |                |              |                |              |                |              |                |              |                |              |                |            |                |              |                |
| <40                                                                    | 4,502         | 16.4 %         | 840            | 8.3 %          | 414          | 5.9 %          | 1,135        | 32 %           | 272          | 13 %           | 328          | 29.8 %         | 379          | 35.8 %         | 239        | 31.4 %         | 895          | 48.6 %         |
| 41-60                                                                  | 10,328        | 37.4 %         | 3,373          | 33.2 %         | 2,464        | 35.1 %         | 1,600        | 45.1 %         | 1,285        | 61.3 %         | 400          | 36.3 %         | 237          | 22.4 %         | 377        | 49.6 %         | 592          | 32.1 %         |
| >60                                                                    | 12,760        | 46.2 %         | 5,947          | 58.6 %         | 4,145        | 59.0 %         | 814          | 22.9 %         | 538          | 25.7 %         | 373          | 33.9 %         | 444          | 41.8 %         | 144        | 18.9 %         | 355          | 19.2 %         |
| <b>Education</b>                                                       |               |                |                |                |              |                |              |                |              |                |              |                |              |                |            |                |              |                |
| Higher education                                                       | 18,925        | 68.6 %         | 6,954          | 68.4 %         | 4,279        | 60.9 %         | 2,936        | 82.7 %         | 1,415        | 67.5 %         | 731          | 66.4 %         | 699          | 65.9 %         | 529        | 69.6 %         | 1,382        | 75.0 %         |
| Lower education                                                        | 8,665         | 31.4 %         | 3,206          | 31.6 %         | 2,744        | 39.1 %         | 613          | 17.2 %         | 680          | 32.4 %         | 370          | 33.6 %         | 361          | 34.0 %         | 231        | 30.4 %         | 460          | 25.0 %         |
| <b>Relationship status</b>                                             |               |                |                |                |              |                |              |                |              |                |              |                |              |                |            |                |              |                |
| Married or in a stable relationship                                    | 19,819        | 71.8 %         | 7,545          | 74.3 %         | 4,947        | 70.4 %         | 2,663        | 75.0 %         | 1,480        | 70.6 %         | 754          | 68.5 %         | 708          | 66.8 %         | 529        | 69.6 %         | 1,193        | 64.8 %         |
| Not in a stable relationship                                           | 7,771         | 28.2 %         | 2,615          | 25.7 %         | 2,076        | 29.6 %         | 886          | 25.0 %         | 615          | 29.4 %         | 347          | 31.5 %         | 352          | 33.2 %         | 231        | 30.4 %         | 649          | 35.2 %         |
| <b>Occupation*</b>                                                     |               |                |                |                |              |                |              |                |              |                |              |                |              |                |            |                |              |                |
| Employed for wages                                                     | 14,181        | 51.4 %         | 4,426          | 43.6 %         | 3,089        | 44.0 %         | 2,507        | 70.6 %         | 1,418        | 67.7 %         | 645          | 58.6 %         | 516          | 48.7 %         | 546        | 71.8 %         | 1,034        | 56.1 %         |
| Retired                                                                | 10,550        | 38.2 %         | 5,334          | 52.5 %         | 3,117        | 44.4 %         | 533          | 15.0 %         | 431          | 20.6 %         | 315          | 28.6 %         | 408          | 38.5 %         | 114        | 15.0 %         | 298          | 16.2 %         |
| Other                                                                  | 9,708         | 35.2 %         | 3,188          | 31.3 %         | 2,596        | 37.0 %         | 1,227        | 34.5 %         | 900          | 42.9 %         | 305          | 27.7 %         | 353          | 33.3 %         | 226        | 29.8 %         | 913          | 49.6 %         |
| <b>Employment and/or education in health care</b>                      |               |                |                |                |              |                |              |                |              |                |              |                |              |                |            |                |              |                |
| No                                                                     | 16,955        | 61.5 %         | 6,457          | 63.6 %         | 4,275        | 60.9 %         | 2,070        | 58.3 %         | 1,334        | 63.7 %         | 621          | 56.4 %         | 692          | 65.3 %         | 464        | 61.1 %         | 1,042        | 56.6 %         |
| Yes                                                                    | 10,635        | 38.5 %         | 3,703          | 36.4 %         | 2,748        | 39.1 %         | 1,479        | 41.7 %         | 761          | 36.3 %         | 480          | 43.6 %         | 368          | 34.7 %         | 296        | 38.9 %         | 800          | 43.4 %         |
| <b>Participation in brain research</b>                                 |               |                |                |                |              |                |              |                |              |                |              |                |              |                |            |                |              |                |
| No                                                                     | 15,671        | 56.8 %         | 4,131          | 40.7 %         | 3,906        | 55.6 %         | 2,915        | 82.1 %         | 831          | 39.7 %         | 976          | 88.6 %         | 774          | 73.0 %         | 687        | 90.4 %         | 1,451        | 78.8 %         |
| Yes                                                                    | 11,919        | 43.2 %         | 6,029          | 59.3 %         | 3,117        | 44.4 %         | 634          | 17.9 %         | 1,264        | 60.3 %         | 125          | 11.4 %         | 286          | 27.0 %         | 73         | 9.6 %          | 391          | 21.2 %         |

|    |                                                                       |        |       |       |       |       |       |       |       |       |       |       |       |       |       |     |       |       |       |
|----|-----------------------------------------------------------------------|--------|-------|-------|-------|-------|-------|-------|-------|-------|-------|-------|-------|-------|-------|-----|-------|-------|-------|
| 1  | <b>Self-rated cognitive health</b>                                    |        |       |       |       |       |       |       |       |       |       |       |       |       |       |     |       |       |       |
| 2  | Below average                                                         | 1,661  | 6.0%  | 693   | 6.8%  | 406   | 5.8%  | 238   | 6.7%  | 91    | 4.3%  | 42    | 3.8%  | 32    | 3.0%  | 87  | 11.4% | 72    | 3.9%  |
| 3  | Average or above average                                              | 25,929 | 94.0% | 9,467 | 93.2% | 6,617 | 94.2% | 3,311 | 93.3% | 2,004 | 95.7% | 1,059 | 96.2% | 1,028 | 97.0% | 673 | 88.6% | 1,770 | 96.1% |
| 4  |                                                                       |        |       |       |       |       |       |       |       |       |       |       |       |       |       |     |       |       |       |
| 5  |                                                                       |        |       |       |       |       |       |       |       |       |       |       |       |       |       |     |       |       |       |
| 6  | <b>Self-rated mental health</b>                                       |        |       |       |       |       |       |       |       |       |       |       |       |       |       |     |       |       |       |
| 7  | Below average                                                         | 3,632  | 13.2% | 1,306 | 12.9% | 860   | 12.2% | 496   | 14.0% | 206   | 9.8%  | 130   | 11.8% | 169   | 15.9% | 182 | 23.9% | 283   | 15.4% |
| 8  | Average or above average                                              | 23,958 | 86.8% | 8,854 | 87.1% | 6,163 | 87.8% | 3,053 | 86.0% | 1,889 | 90.2% | 971   | 88.2% | 891   | 84.1% | 578 | 76.1% | 1,559 | 84.6% |
| 9  |                                                                       |        |       |       |       |       |       |       |       |       |       |       |       |       |       |     |       |       |       |
| 10 |                                                                       |        |       |       |       |       |       |       |       |       |       |       |       |       |       |     |       |       |       |
| 11 | <b>Experience of illness, disability or health problem</b>            |        |       |       |       |       |       |       |       |       |       |       |       |       |       |     |       |       |       |
| 12 | No                                                                    | 16,451 | 59.6% | 5,806 | 57.1% | 4,216 | 60.0% | 1,971 | 55.5% | 1,527 | 72.9% | 736   | 66.8% | 606   | 57.2% | 372 | 48.9% | 1,217 | 66.1% |
| 13 | Yes                                                                   | 11,139 | 40.4% | 4,354 | 42.9% | 2,807 | 40.0% | 1,578 | 44.5% | 568   | 27.1% | 365   | 33.2% | 454   | 42.8% | 388 | 51.1% | 625   | 33.9% |
| 14 |                                                                       |        |       |       |       |       |       |       |       |       |       |       |       |       |       |     |       |       |       |
| 15 |                                                                       |        |       |       |       |       |       |       |       |       |       |       |       |       |       |     |       |       |       |
| 16 | <b>Experience as caregiver of patient with brain disease</b>          |        |       |       |       |       |       |       |       |       |       |       |       |       |       |     |       |       |       |
| 17 | No                                                                    | 14,762 | 53.5% | 4,355 | 42.9% | 3,686 | 52.5% | 2,206 | 62.2% | 1,254 | 59.9% | 782   | 71.0% | 841   | 79.3% | 459 | 60.4% | 1,179 | 64.0% |
| 18 | Yes                                                                   | 12,828 | 46.5% | 5,805 | 57.1% | 3,337 | 47.5% | 1,343 | 37.8% | 841   | 40.1% | 319   | 29.0% | 219   | 20.7% | 301 | 39.6% | 663   | 36.0% |
| 19 |                                                                       |        |       |       |       |       |       |       |       |       |       |       |       |       |       |     |       |       |       |
| 20 |                                                                       |        |       |       |       |       |       |       |       |       |       |       |       |       |       |     |       |       |       |
| 21 |                                                                       |        |       |       |       |       |       |       |       |       |       |       |       |       |       |     |       |       |       |
| 22 |                                                                       |        |       |       |       |       |       |       |       |       |       |       |       |       |       |     |       |       |       |
| 23 | * Percentages add up to >100% because multiple responses were allowed |        |       |       |       |       |       |       |       |       |       |       |       |       |       |     |       |       |       |
| 24 |                                                                       |        |       |       |       |       |       |       |       |       |       |       |       |       |       |     |       |       |       |

# Lifebrain Global Brain Health Survey- Supplementary material 3: Odd ratios and 95% Confidence Intervals across all demographic characteristics

## Table of Contents

|                                                                                                             |    |
|-------------------------------------------------------------------------------------------------------------|----|
| Table 1. Q1 - in your opinion, does <i>family income</i> have an influence on brain health? .....           | 2  |
| Table 2. Q1 - in your opinion, does <i>profession</i> have an influence on brain health? .....              | 3  |
| Table 3. Q1: - in your opinion, does <i>education</i> have an influence on brain health?.....               | 4  |
| Table 4. Q1 - in your opinion, does <i>diet</i> have an influence on brain health?.....                     | 5  |
| Table 5. Q1 - in your opinion, does the <i>physical environment</i> have an influence on brain health?..... | 6  |
| Table 6. Q1 - in your opinion, do <i>life goals</i> have an influence on brain health? .....                | 7  |
| Table 7. Q1 - in your opinion, does the <i>social environment</i> have an influence on brain health? .....  | 8  |
| Table 8. Q1 - in your opinion, do <i>sleeping habits</i> have an influence on brain health? .....           | 9  |
| Table 9. Q1 - in your opinion, does <i>physical health</i> have an influence on brain health? .....         | 10 |
| Table 10. Q1 - in your opinion, does <i>genetics</i> have an influence on brain health?.....                | 11 |
| Table 11. Q1 - in your opinion, does <i>substance use</i> have an influence on brain health?.....           | 12 |
| Table 12. Q2 - in your opinion, is it important to look after one's <i>brain in the womb</i> ? .....        | 13 |
| Table 13. Q2 - in your opinion, is it important to look after one's <i>brain in childhood</i> ? .....       | 14 |
| Table 14. Q2 - in your opinion, is it important to look after one's <i>brain in adolescence</i> ?.....      | 15 |
| Table 15. Q2 - in your opinion, is it important to look after one's <i>brain in young adulthood</i> ?.....  | 16 |
| Table 16. Q2 - in your opinion, is it important to look after one's <i>brain in middle age</i> ?.....       | 17 |
| Table 17. Q2 - in your opinion, is it important to look after one's <i>brain in old age</i> ? .....         | 18 |
| Table 18. Q3 - I associate <i>Alzheimer's disease and other forms of dementia</i> with the brain* .....     | 19 |
| Table 19. Q3 - I associate <i>schizophrenia</i> with the brain.....                                         | 20 |
| Table 20. Q3 - I associate <i>depression</i> with the brain.....                                            | 21 |
| Table 21. Q3 - I associate <i>bipolar disorder</i> with the brain .....                                     | 22 |
| Table 22. Q3 - I associate <i>anxiety</i> with the brain .....                                              | 23 |
| Table 23. Q3 - I associate <i>addiction (e.g. drugs, alcohol)</i> with the brain .....                      | 24 |
| Table 24. Q3 - I associate <i>stroke</i> with the brain .....                                               | 25 |
| Table 25. Q3 - I associate <i>Parkinson's disease</i> with the brain.....                                   | 26 |
| Table 26. Q3 - I associate <i>migraine</i> with the brain .....                                             | 27 |
| Table 27. Q3 - I associate <i>cancer</i> with the brain .....                                               | 28 |
| Table 28. Q3 - I associate <i>hypertension (high blood pressure)</i> with the brain .....                   | 29 |
| Table 29. Q3 - I associate <i>diabetes</i> with the brain .....                                             | 30 |
| Table 30. Q3 - I associate <i>arthritis</i> with the brain .....                                            | 31 |

Table 1. Q1 - in your opinion, does *family income* have an influence on brain health?

| Variable\Subgroup                   | Descriptive   |        | OR   | Inferential<br>CI (95%) |       |
|-------------------------------------|---------------|--------|------|-------------------------|-------|
|                                     | Positive      | n      |      | lower                   | upper |
| <b>Gender</b>                       |               |        |      |                         |       |
| Woman                               | 7 061 (36.2%) | 19 527 | 1    |                         |       |
| Man                                 | 2 720 (35.0%) | 7 782  | 0.95 | 0.9                     | 1     |
| Other/Undisclosed                   | 51 (40.2%)    | 127    | 1.18 | 0.83                    | 1.69  |
| <b>Age</b>                          |               |        |      |                         |       |
| >60                                 | 4 666 (36.8%) | 12 667 | 1    |                         |       |
| 41-60                               | 3 732 (36.3%) | 10 287 | 0.98 | 0.93                    | 1.03  |
| <41                                 | 1 434 (32.0%) | 4 482  | 0.81 | 0.75                    | 0.87  |
| <b>Education</b>                    |               |        |      |                         |       |
| Higher                              | 6 607 (35.1%) | 18 834 | 1    |                         |       |
| Lower                               | 3 225 (37.5%) | 8 602  | 1.11 | 1.05                    | 1.17  |
| <b>Relationship</b>                 |               |        |      |                         |       |
| Not stable                          | 4 335 (35.9%) | 12 091 | 1    |                         |       |
| Stable                              | 5 497 (35.8%) | 15 345 | 1.00 | 0.95                    | 1.05  |
| <b>Healthcare Experience</b>        |               |        |      |                         |       |
| No                                  | 5 641 (33.5%) | 16 855 | 1    |                         |       |
| Yes                                 | 4 191 (39.6%) | 10 581 | 1.30 | 1.24                    | 1.37  |
| <b>Brain Research Participation</b> |               |        |      |                         |       |
| No                                  | 5 499 (35.3%) | 15 577 | 1    |                         |       |
| Yes                                 | 4 333 (36.5%) | 11 859 | 1.06 | 1                       | 1.11  |
| <b>Cognitive Health</b>             |               |        |      |                         |       |
| Average or above                    | 9 227 (35.8%) | 25 787 | 1    |                         |       |
| Below average                       | 605 (36.7%)   | 1 649  | 1.04 | 0.94                    | 1.15  |
| <b>Mental Health</b>                |               |        |      |                         |       |
| Average or above                    | 8 535 (35.8%) | 23 822 | 1    |                         |       |
| Below average                       | 1 297 (35.9%) | 3 614  | 1.00 | 0.93                    | 1.08  |
| <b>Illness Experience</b>           |               |        |      |                         |       |
| No                                  | 5 651 (34.5%) | 16 375 | 1    |                         |       |
| Yes                                 | 4 181 (37.8%) | 11 061 | 1.15 | 1.1                     | 1.21  |
| <b>Brain Disease Caregiver</b>      |               |        |      |                         |       |
| No                                  | 5 199 (35.4%) | 14 682 | 1    |                         |       |
| Yes                                 | 4 633 (36.3%) | 12 754 | 1.04 | 0.99                    | 1.09  |

Table 2. Q1 - in your opinion, does *profession* have an influence on brain health?

| Variable\Subgroup                   | Descriptive    |        | OR   | Inferential<br>CI (95%) |       |
|-------------------------------------|----------------|--------|------|-------------------------|-------|
|                                     | Positive       | n      |      | lower                   | upper |
| <b>Gender</b>                       |                |        |      |                         |       |
| Woman                               | 10 675 (54.6%) | 19 542 | 1    |                         |       |
| Man                                 | 4 572 (58.7%)  | 7 790  | 1.18 | 1.12                    | 1.24  |
| Other/Undisclosed                   | 69 (54.3%)     | 127    | 0.99 | 0.70                    | 1.40  |
| <b>Age</b>                          |                |        |      |                         |       |
| >60                                 | 6 749 (53.2%)  | 12 675 | 1    |                         |       |
| 41-60                               | 5 866 (57.0%)  | 10 300 | 1.16 | 1.10                    | 1.22  |
| <41                                 | 2 701 (60.2%)  | 4 484  | 1.33 | 1.24                    | 1.43  |
| <b>Education</b>                    |                |        |      |                         |       |
| Higher                              | 10 929 (58.0%) | 18 855 | 1    |                         |       |
| Lower                               | 4 387 (51.0%)  | 8 604  | 0.75 | 0.72                    | 0.79  |
| <b>Relationship</b>                 |                |        |      |                         |       |
| Not stable                          | 6 788 (56.1%)  | 12 107 | 1    |                         |       |
| Stable                              | 8 528 (55.5%)  | 15 352 | 0.98 | 0.93                    | 1.03  |
| <b>Healthcare Experience</b>        |                |        |      |                         |       |
| No                                  | 9 080 (53.9%)  | 16 861 | 1    |                         |       |
| Yes                                 | 6 236 (58.8%)  | 10 598 | 1.23 | 1.17                    | 1.29  |
| <b>Brain Research Participation</b> |                |        |      |                         |       |
| No                                  | 8 931 (57.3%)  | 15 590 | 1    |                         |       |
| Yes                                 | 6 385 (53.8%)  | 11 869 | 0.87 | 0.83                    | 0.91  |
| <b>Cognitive Health</b>             |                |        |      |                         |       |
| Average or above                    | 14 473 (56.1%) | 25 810 | 1    |                         |       |
| Below average                       | 843 (51.1%)    | 1 649  | 0.82 | 0.74                    | 0.91  |
| <b>Mental Health</b>                |                |        |      |                         |       |
| Average or above                    | 13 404 (56.2%) | 23 847 | 1    |                         |       |
| Below average                       | 1 912 (52.9%)  | 3 612  | 0.88 | 0.82                    | 0.94  |
| <b>Illness Experience</b>           |                |        |      |                         |       |
| No                                  | 9 234 (56.4%)  | 16 383 | 1    |                         |       |
| Yes                                 | 6 082 (54.9%)  | 11 076 | 0.94 | 0.90                    | 0.99  |
| <b>Brain Disease Caregiver</b>      |                |        |      |                         |       |
| No                                  | 8 392 (57.2%)  | 14 682 | 1    |                         |       |
| Yes                                 | 6 924 (54.2%)  | 12 777 | 0.89 | 0.85                    | 0.93  |

Table 3. Q1: - in your opinion, does *education* have an influence on brain health?

| Variable\Subgroup                        | Descriptive    |        | Inferential |          |      |
|------------------------------------------|----------------|--------|-------------|----------|------|
|                                          | positive       | n      | OR          | CI (95%) |      |
| <b>Gender</b>                            |                |        |             |          |      |
| Woman                                    | 11 695 (59.8%) | 19 550 | 1           |          |      |
| Man                                      | 4 888 (62.7%)  | 7 796  | 1.13        | 1.07     | 1.19 |
| Other/Undisclosed                        | 82 (64.6%)     | 127    | 1.22        | 0.85     | 1.76 |
| <b>Age</b>                               |                |        |             |          |      |
| >60                                      | 7 722 (60.9%)  | 12 685 | 1           |          |      |
| 41-60                                    | 6 099 (59.2%)  | 10 301 | 0.93        | 0.89     | 0.98 |
| <41                                      | 2 844 (63.4%)  | 4 487  | 1.113       | 1.04     | 1.19 |
| <b>Education</b>                         |                |        |             |          |      |
| Higher                                   | 12 134 (64.3%) | 18 865 | 1           |          |      |
| Lower                                    | 4 531 (52.6%)  | 8 608  | 0.62        | 0.59     | 0.65 |
| <b>Relationship</b>                      |                |        |             |          |      |
| Not stable                               | 7 307 (60.3%)  | 12 114 | 1           |          |      |
| Stable                                   | 9 358 (60.9%)  | 15 359 | 1.03        | 0.98     | 1.08 |
| <b>Healthcare Experience</b>             |                |        |             |          |      |
| No                                       | 9 790 (58.0%)  | 16 870 | 1           |          |      |
| Yes                                      | 6 875 (64.8%)  | 10 603 | 1.33        | 1.27     | 1.40 |
| <b>Brain Research Participation</b>      |                |        |             |          |      |
| No                                       | 9 493 (60.8%)  | 15 609 | 1           |          |      |
| Yes                                      | 7 172 (60.5%)  | 11 864 | 0.98        | 0.94     | 1.03 |
| <b>Cognitive Health</b>                  |                |        |             |          |      |
| Average or above                         | 15 811 (61.2%) | 25 824 | 1           |          |      |
| Below average                            | 854 (51.8%)    | 1 649  | 0.68        | 0.62     | 0.75 |
| <b>Mental Health</b>                     |                |        |             |          |      |
| Average or above                         | 14 720 (61.7%) | 23 857 | 1           |          |      |
| Below average                            | 1 945 (53.8%)  | 3 616  | 0.72        | 0.67     | 0.78 |
| <b>Illness Experience</b>                |                |        |             |          |      |
| No                                       | 10 103 (61.6%) | 16 391 | 1           |          |      |
| Yes                                      | 6 562 (59.2%)  | 11 082 | 0.90        | 0.86     | 0.95 |
| <b>Brain Disease Caregiver Caregiver</b> |                |        |             |          |      |
| No                                       | 9 053 (61.6%)  | 14 698 | 1           |          |      |
| Yes                                      | 7 612 (59.6%)  | 12 775 | 0.92        | 0.88     | 0.97 |



Table 4. Q1 - in your opinion, does *diet* have an influence on brain health?

| Variable\Subgroup                   | Descriptive    |        | Inferential |                   |       |
|-------------------------------------|----------------|--------|-------------|-------------------|-------|
|                                     | positive       | n      | OR          | CI (95%)<br>lower | upper |
| <b>Gender</b>                       |                |        |             |                   |       |
| Woman                               | 14 352 (73.7%) | 19 471 | 1           |                   |       |
| Man                                 | 5 139 (66.2%)  | 7 765  | 0.70        | 0.66              | 0.74  |
| Other/Undisclosed                   | 92 (72.4%)     | 127    | 0.94        | 0.63              | 1.39  |
| <b>Age</b>                          |                |        |             |                   |       |
| >60                                 | 8 411 (66.7%)  | 12 611 | 1           |                   |       |
| 41-60                               | 7 759 (75.6%)  | 10 270 | 1.54        | 1.46              | 1.64  |
| <41                                 | 3 413 (76.1%)  | 4 482  | 1.59        | 1.48              | 1.72  |
| <b>Education</b>                    |                |        |             |                   |       |
| Higher                              | 13 742 (73.1%) | 18 793 | 1           |                   |       |
| Lower                               | 5 841 (68.2%)  | 8 570  | 0.79        | 0.74              | 0.83  |
| <b>Relationship</b>                 |                |        |             |                   |       |
| Not stable                          | 8 697 (72.0%)  | 12 079 | 1           |                   |       |
| Stable                              | 10 886 (71.2%) | 15 284 | 0.96        | 0.91              | 1.01  |
| <b>Healthcare Experience</b>        |                |        |             |                   |       |
| No                                  | 11 604 (69.0%) | 16 809 | 1           |                   |       |
| Yes                                 | 7 979 (75.6%)  | 10 554 | 1.39        | 1.32              | 1.47  |
| <b>Brain Research Participation</b> |                |        |             |                   |       |
| No                                  | 11 067 (71.2%) | 15 546 | 1           |                   |       |
| Yes                                 | 8 516 (72.1%)  | 11 817 | 1.04        | 0.99              | 1.10  |
| <b>Cognitive Health</b>             |                |        |             |                   |       |
| Average or above                    | 18 564 (72.2%) | 25 723 | 1           |                   |       |
| Below average                       | 1 019 (62.1%)  | 1 640  | 0.63        | 0.57              | 0.70  |
| <b>Mental Health</b>                |                |        |             |                   |       |
| Average or above                    | 17 170 (72.3%) | 23 752 | 1           |                   |       |
| Below average                       | 2 413 (66.8%)  | 3 611  | 0.77        | 0.72              | 0.83  |
| <b>Illness Experience</b>           |                |        |             |                   |       |
| No                                  | 11 860 (72.6%) | 16 328 | 1           |                   |       |
| Yes                                 | 7 723 (70.0%)  | 11 035 | 0.88        | 0.83              | 0.93  |
| <b>Brain Disease Caregiver</b>      |                |        |             |                   |       |
| No                                  | 10 236 (70.0%) | 14 630 | 1           |                   |       |
| Yes                                 | 9 347 (73.4%)  | 12 733 | 1.18        | 1.12              | 1.25  |

Table 5. Q1 - in your opinion, does the *physical environment* have an influence on brain health?

| Variable\Subgroup                   | Descriptive    |        | Inferential |          |       |
|-------------------------------------|----------------|--------|-------------|----------|-------|
|                                     | positive       | n      | OR          | CI (95%) |       |
|                                     |                |        |             | lower    | upper |
| <b>Gender</b>                       |                |        |             |          |       |
| Woman                               | 14 191 (72.7%) | 19 522 | 1           |          |       |
| Man                                 | 5 416 (69.6%)  | 7 784  | 0.86        | 0.81     | 0.91  |
| Other/Undisclosed                   | 98 (77.8%)     | 126    | 1.31        | 0.86     | 2.00  |
| <b>Age</b>                          |                |        |             |          |       |
| >60                                 | 8 836 (69.8%)  | 12 656 | 1           |          |       |
| 41-60                               | 7 655 (74.3%)  | 10 296 | 1.25        | 1.18     | 1.33  |
| <41                                 | 3 214 (71.7%)  | 4 480  | 1.10        | 1.02     | 1.18  |
| <b>Education</b>                    |                |        |             |          |       |
| Higher                              | 13 466 (71.5%) | 18 838 | 1           |          |       |
| Lower                               | 6 239 (72.6%)  | 8 594  | 1.06        | 1.00     | 1.12  |
| <b>Relationship</b>                 |                |        |             |          |       |
| Not stable                          | 8 779 (72.6%)  | 12 095 | 1           |          |       |
| Stable                              | 10 926 (71.2%) | 15 337 | 0.94        | 0.89     | 0.99  |
| <b>Healthcare Experience</b>        |                |        |             |          |       |
| No                                  | 11 879 (70.5%) | 16 854 | 1           |          |       |
| Yes                                 | 7 826 (74.0%)  | 10 578 | 1.19        | 1.13     | 1.26  |
| <b>Brain Research Participation</b> |                |        |             |          |       |
| No                                  | 11 164 (71.7%) | 15 575 | 1           |          |       |
| Yes                                 | 8 541 (72.0%)  | 11 857 | 1.02        | 0.97     | 1.07  |
| <b>Cognitive Health</b>             |                |        |             |          |       |
| Average or above                    | 18 601 (72.1%) | 25 791 | 1           |          |       |
| Below average                       | 1 104 (67.3%)  | 1 641  | 0.79        | 0.71     | 0.88  |
| <b>Mental Health</b>                |                |        |             |          |       |
| Average or above                    | 17 171 (72.1%) | 23 824 | 1           |          |       |
| Below average                       | 2 534 (70.2%)  | 3 608  | 0.91        | 0.85     | 0.99  |
| <b>Illness Experience</b>           |                |        |             |          |       |
| No                                  | 11 585 (70.7%) | 16 376 | 1           |          |       |
| Yes                                 | 8 120 (73.4%)  | 11 056 | 1.14        | 1.08     | 1.21  |
| <b>Brain Disease Caregiver</b>      |                |        |             |          |       |
| No                                  | 10 490 (71.5%) | 14 668 | 1           |          |       |
| Yes                                 | 9 215 (72.2%)  | 12 764 | 1.03        | 0.98     | 1.09  |

Table 6. Q1 - in your opinion, do *life goals* have an influence on brain health?

| Variable\Subgroup                   | Descriptive    |        | OR   | Inferential<br>CI (95%) |       |
|-------------------------------------|----------------|--------|------|-------------------------|-------|
|                                     | positive       | n      |      | lower                   | upper |
| <b>Gender</b>                       |                |        |      |                         |       |
| Woman                               | 14 370 (73.5%) | 19 562 | 1    |                         |       |
| Man                                 | 5 549 (71.1%)  | 7 807  | 0.89 | 0.84                    | 0.94  |
| Other/Undisclosed                   | 90 (70.9%)     | 127    | 0.88 | 0.60                    | 1.29  |
| <b>Age</b>                          |                |        |      |                         |       |
| >60                                 | 9 441 (74.3%)  | 12 706 | 1    |                         |       |
| 41-60                               | 7 551 (73.3%)  | 10 302 | 0.95 | 0.90                    | 1.01  |
| <41                                 | 3 017 (67.2%)  | 4 488  | 0.71 | 0.66                    | 0.76  |
| <b>Education</b>                    |                |        |      |                         |       |
| Higher                              | 13 811 (73.2%) | 18 875 | 1    |                         |       |
| Lower                               | 6 198 (71.9%)  | 8 621  | 0.94 | 0.89                    | 0.99  |
| <b>Relationship</b>                 |                |        |      |                         |       |
| Not stable                          | 8 804 (72.6%)  | 12 121 | 1    |                         |       |
| Stable                              | 11 205 (72.9%) | 15 375 | 1.01 | 0.96                    | 1.07  |
| <b>Healthcare Experience</b>        |                |        |      |                         |       |
| No                                  | 11 978 (70.9%) | 16 888 | 1    |                         |       |
| Yes                                 | 8 031 (75.7%)  | 10 608 | 1.28 | 1.21                    | 1.35  |
| <b>Brain Research Participation</b> |                |        |      |                         |       |
| No                                  | 11 550 (74.0%) | 15 611 | 1    |                         |       |
| Yes                                 | 8 459 (71.2%)  | 11 885 | 0.87 | 0.82                    | 0.92  |
| <b>Cognitive Health</b>             |                |        |      |                         |       |
| Average or above                    | 18 839 (72.9%) | 25 846 | 1    |                         |       |
| Below average                       | 1 170 (70.9%)  | 1 650  | 0.91 | 0.81                    | 1.01  |
| <b>Mental Health</b>                |                |        |      |                         |       |
| Average or above                    | 17 521 (73.4%) | 23 880 | 1    |                         |       |
| Below average                       | 2 488 (68.8%)  | 3 616  | 0.80 | 0.74                    | 0.86  |
| <b>Illness Experience</b>           |                |        |      |                         |       |
| No                                  | 11 891 (72.5%) | 16 396 | 1    |                         |       |
| Yes                                 | 8 118 (73.1%)  | 11 100 | 1.03 | 0.98                    | 1.09  |
| <b>Brain Disease Caregiver</b>      |                |        |      |                         |       |
| No                                  | 10 756 (73.1%) | 14 708 | 1    |                         |       |
| Yes                                 | 9 253 (72.4%)  | 12 788 | 0.96 | 0.91                    | 1.01  |

Table 7. Q1 - in your opinion, does the *social environment* have an influence on brain health?

| Variable\Subgroup                   | Descriptive    |        | Inferential |          |       |
|-------------------------------------|----------------|--------|-------------|----------|-------|
|                                     | positive       | n      | OR          | CI (95%) |       |
|                                     |                |        |             | lower    | upper |
| <b>Gender</b>                       |                |        |             |          |       |
| Woman                               | 16 441 (84.1%) | 19 559 | 1           |          |       |
| Man                                 | 6 184 (79.2%)  | 7 804  | 0.72        | 0.68     | 0.77  |
| Other/Undisclosed                   | 113 (90.4%)    | 125    | 1.79        | 0.98     | 3.24  |
| <b>Age</b>                          |                |        |             |          |       |
| >60                                 | 10 148 (79.9%) | 12 694 | 1           |          |       |
| 41-60                               | 8 671 (84.1%)  | 10 306 | 1.33        | 1.24     | 1.43  |
| <41                                 | 3 919 (87.3%)  | 4 488  | 1.73        | 1.57     | 1.91  |
| <b>Education</b>                    |                |        |             |          |       |
| Higher                              | 15 768 (83.6%) | 18 870 | 1           |          |       |
| Lower                               | 6 970 (80.9%)  | 8 618  | 0.83        | 0.78     | 0.89  |
| <b>Relationship</b>                 |                |        |             |          |       |
| Not stable                          | 10 054 (82.9%) | 12 122 | 1           |          |       |
| Stable                              | 12 684 (82.5%) | 15 366 | 0.97        | 0.91     | 1.04  |
| <b>Healthcare Experience</b>        |                |        |             |          |       |
| No                                  | 13 615 (80.6%) | 16 887 | 1           |          |       |
| Yes                                 | 9 123 (86.1%)  | 10 601 | 1.48        | 1.39     | 1.59  |
| <b>Brain Research Participation</b> |                |        |             |          |       |
| No                                  | 12 983 (83.2%) | 15 608 | 1           |          |       |
| Yes                                 | 9 755 (82.1%)  | 11 880 | 0.93        | 0.87     | 0.99  |
| <b>Cognitive Health</b>             |                |        |             |          |       |
| Average or above                    | 21 472 (83.1%) | 25 835 | 1           |          |       |
| Below average                       | 1 266 (76.6%)  | 1 653  | 0.66        | 0.59     | 0.75  |
| <b>Mental Health</b>                |                |        |             |          |       |
| Average or above                    | 19 732 (82.7%) | 23 870 | 1           |          |       |
| Below average                       | 3 006 (83.1%)  | 3 618  | 1.03        | 0.94     | 1.13  |
| <b>Illness Experience</b>           |                |        |             |          |       |
| No                                  | 13 612 (83.0%) | 16 398 | 1           |          |       |
| Yes                                 | 9 126 (82.3%)  | 11 090 | 0.95        | 0.89     | 1.01  |
| <b>Brain Disease Caregiver</b>      |                |        |             |          |       |
| No                                  | 12 120 (82.4%) | 14 705 | 1           |          |       |
| Yes                                 | 10 618 (83.1%) | 12 783 | 1.05        | 0.98     | 1.11  |

Table 8. Q1 - in your opinion, do *sleeping habits* have an influence on brain health?

| Variable\Subgroup                   | Descriptive    |        | Inferential |          |       |
|-------------------------------------|----------------|--------|-------------|----------|-------|
|                                     | positive       | n      | OR          | CI (95%) |       |
|                                     |                |        |             | lower    | upper |
| <b>Gender</b>                       |                |        |             |          |       |
| Woman                               | 16 921 (86.5%) | 19 554 | 1           |          |       |
| Man                                 | 6 340 (81.3%)  | 7 796  | 0.68        | 0.63     | 0.73  |
| Other/Undisclosed                   | 111 (87.4%)    | 127    | 1.08        | 0.64     | 1.83  |
| <b>Age</b>                          |                |        |             |          |       |
| >60                                 | 10 097 (79.6%) | 12 685 | 1           |          |       |
| 41-60                               | 9 166 (89.0%)  | 10 304 | 2.06        | 1.92     | 2.23  |
| <41                                 | 4 109 (91.6%)  | 4 488  | 2.78        | 2.48     | 3.11  |
| <b>Education</b>                    |                |        |             |          |       |
| Higher                              | 16 185 (85.8%) | 18 863 | 1           |          |       |
| Lower                               | 7 187 (83.4%)  | 8 614  | 0.83        | 0.78     | 0.89  |
| <b>Relationship</b>                 |                |        |             |          |       |
| Not stable                          | 10 479 (86.5%) | 12 112 | 1           |          |       |
| Stable                              | 12 893 (83.9%) | 15 365 | 0.81        | 0.76     | 0.87  |
| <b>Healthcare Experience</b>        |                |        |             |          |       |
| No                                  | 14 112 (83.6%) | 16 874 | 1           |          |       |
| Yes                                 | 9 260 (87.3%)  | 10 603 | 1.35        | 1.26     | 1.45  |
| <b>Brain Research Participation</b> |                |        |             |          |       |
| No                                  | 13 571 (86.9%) | 15 608 | 1           |          |       |
| Yes                                 | 9 801 (82.6%)  | 11 869 | 0.71        | 0.67     | 0.76  |
| <b>Cognitive Health</b>             |                |        |             |          |       |
| Average or above                    | 21 983 (85.1%) | 25 824 | 1           |          |       |
| Below average                       | 1 389 (84.0%)  | 1 653  | 0.92        | 0.80     | 1.05  |
| <b>Mental Health</b>                |                |        |             |          |       |
| Average or above                    | 20 187 (84.6%) | 23 857 | 1           |          |       |
| Below average                       | 3 185 (88.0%)  | 3 620  | 1.33        | 1.20     | 1.48  |
| <b>Illness Experience</b>           |                |        |             |          |       |
| No                                  | 13 838 (84.5%) | 16 384 | 1           |          |       |
| Yes                                 | 9 534 (85.9%)  | 11 093 | 1.13        | 1.05     | 1.20  |
| <b>Brain Disease Caregiver</b>      |                |        |             |          |       |
| No                                  | 12 549 (85.4%) | 14 695 | 1           |          |       |
| Yes                                 | 10 823 (84.7%) | 12 782 | 0.94        | 0.88     | 1.01  |

Table 9. Q1 - in your opinion, does *physical health* have an influence on brain health?

| Variable\Subgroup                   | Descriptive    |        | Inferential |          |       |
|-------------------------------------|----------------|--------|-------------|----------|-------|
|                                     | positive       | n      | OR          | CI (95%) |       |
|                                     |                |        |             | lower    | upper |
| <b>Gender</b>                       |                |        |             |          |       |
| Woman                               | 17 244 (88.3%) | 19 525 | 1           |          |       |
| Man                                 | 6 653 (85.3%)  | 7 798  | 0.77        | 0.71     | 0.83  |
| Other/Undisclosed                   | 108 (85.0%)    | 127    | 0.75        | 0.46     | 1.23  |
| <b>Age</b>                          |                |        |             |          |       |
| >60                                 | 10 976 (86.6%) | 12 671 | 1           |          |       |
| 41-60                               | 9 068 (88.1%)  | 10 296 | 1.14        | 1.05     | 1.23  |
| <41                                 | 3 961 (88.4%)  | 4 483  | 1.17        | 1.06     | 1.30  |
| <b>Education</b>                    |                |        |             |          |       |
| Higher                              | 16 697 (88.6%) | 18 851 | 1           |          |       |
| Lower                               | 7 308 (85.0%)  | 8 599  | 0.73        | 0.68     | 0.79  |
| <b>Relationship</b>                 |                |        |             |          |       |
| Not stable                          | 10 540 (87.0%) | 12 110 | 1           |          |       |
| Stable                              | 13 465 (87.8%) | 15 340 | 1.07        | 1.00     | 1.15  |
| <b>Healthcare Experience</b>        |                |        |             |          |       |
| No                                  | 14 454 (85.7%) | 16 862 | 1           |          |       |
| Yes                                 | 9 551 (90.2%)  | 10 588 | 1.53        | 1.42     | 1.66  |
| <b>Brain Research Participation</b> |                |        |             |          |       |
| No                                  | 13 592 (87.2%) | 15 588 | 1           |          |       |
| Yes                                 | 10 413 (87.8%) | 11 862 | 1.06        | 0.98     | 1.13  |
| <b>Cognitive Health</b>             |                |        |             |          |       |
| Average or above                    | 22 682 (87.9%) | 25 802 | 1           |          |       |
| Below average                       | 1 323 (80.3%)  | 1 648  | 0.56        | 0.49     | 0.64  |
| <b>Mental Health</b>                |                |        |             |          |       |
| Average or above                    | 20 948 (87.9%) | 23 830 | 1           |          |       |
| Below average                       | 3 057 (84.4%)  | 3 620  | 0.75        | 0.68     | 0.82  |
| <b>Illness Experience</b>           |                |        |             |          |       |
| No                                  | 14 462 (88.3%) | 16 375 | 1           |          |       |
| Yes                                 | 9 543 (86.2%)  | 11 075 | 0.82        | 0.77     | 0.89  |
| <b>Brain Disease Caregiver</b>      |                |        |             |          |       |
| No                                  | 12 764 (86.9%) | 14 682 | 1           |          |       |
| Yes                                 | 11 241 (88.0%) | 12 768 | 1.11        | 1.03     | 1.19  |

Table 10. Q1 - in your opinion, does *genetics* have an influence on brain health?

| Variable\Subgroup                   | Descriptive    |        | OR   | Inferential<br>CI (95%) |       |
|-------------------------------------|----------------|--------|------|-------------------------|-------|
|                                     | positive       | n      |      | lower                   | upper |
| <b>Gender</b>                       |                |        |      |                         |       |
| Woman                               | 16 311 (83.4%) | 19 556 | 1    |                         |       |
| Man                                 | 6 234 (80.0%)  | 7 796  | 0.79 | 0.74                    | 0.85  |
| Other/Undisclosed                   | 88 (69.8%)     | 126    | 0.46 | 0.31                    | 0.68  |
| <b>Age</b>                          |                |        |      |                         |       |
| >60                                 | 10 588 (83.4%) | 12 689 | 1    |                         |       |
| 41-60                               | 8 610 (83.6%)  | 10 302 | 1.01 | 0.94                    | 1.08  |
| <41                                 | 3 435 (76.6%)  | 4 487  | 0.65 | 0.60                    | 0.70  |
| <b>Education</b>                    |                |        |      |                         |       |
| Higher                              | 15 586 (82.6%) | 18 863 | 1    |                         |       |
| Lower                               | 7 047 (81.8%)  | 8 615  | 0.94 | 0.88                    | 1.01  |
| <b>Relationship</b>                 |                |        |      |                         |       |
| Not stable                          | 9 796 (80.9%)  | 12 115 | 1    |                         |       |
| Stable                              | 12 837 (83.6%) | 15 363 | 1.20 | 1.13                    | 1.28  |
| <b>Healthcare Experience</b>        |                |        |      |                         |       |
| No                                  | 13 797 (81.7%) | 16 882 | 1    |                         |       |
| Yes                                 | 8 836 (83.4%)  | 10 596 | 1.12 | 1.05                    | 1.20  |
| <b>Brain Research Participation</b> |                |        |      |                         |       |
| No                                  | 12 644 (81.0%) | 15 605 | 1    |                         |       |
| Yes                                 | 9 989 (84.1%)  | 11 873 | 1.24 | 1.17                    | 1.32  |
| <b>Cognitive Health</b>             |                |        |      |                         |       |
| Average or above                    | 21 319 (82.5%) | 25 829 | 1    |                         |       |
| Below average                       | 1 314 (79.7%)  | 1 649  | 0.83 | 0.73                    | 0.94  |
| <b>Mental Health</b>                |                |        |      |                         |       |
| Average or above                    | 19 648 (82.3%) | 23 861 | 1    |                         |       |
| Below average                       | 2 985 (82.5%)  | 3 617  | 1.01 | 0.92                    | 1.11  |
| <b>Illness Experience</b>           |                |        |      |                         |       |
| No                                  | 13 446 (82.0%) | 16 390 | 1    |                         |       |
| Yes                                 | 9 187 (82.9%)  | 11 088 | 1.06 | 0.99                    | 1.13  |
| <b>Brain Disease Caregiver</b>      |                |        |      |                         |       |
| No                                  | 11 717 (79.7%) | 14 693 | 1    |                         |       |
| Yes                                 | 10 916 (85.4%) | 12 785 | 1.48 | 1.39                    | 1.58  |

Table 11. Q1 - in your opinion, does *substance use* have an influence on brain health?

| Variable\Subgroup                   | Descriptive    |        | Inferential |          |       |
|-------------------------------------|----------------|--------|-------------|----------|-------|
|                                     | positive       | n      | OR          | CI (95%) |       |
|                                     |                |        |             | lower    | upper |
| <b>Gender</b>                       |                |        |             |          |       |
| Woman                               | 18 238 (93.3%) | 19 551 |             |          |       |
| Man                                 | 7 035 (90.1%)  | 7 807  | 0.66        | 0.60     | 0.72  |
| Other/Undisclosed                   | 109 (85.8%)    | 127    | 0.44        | 0.26     | 0.72  |
| <b>Age</b>                          |                |        |             |          |       |
| >60                                 | 11 491 (90.5%) | 12 692 |             |          |       |
| 41-60                               | 9 712 (94.2%)  | 10 308 | 1.70        | 1.54     | 1.89  |
| <41                                 | 4 179 (93.2%)  | 4 485  | 1.43        | 1.25     | 1.63  |
| <b>Education</b>                    |                |        |             |          |       |
| Higher                              | 17 546 (93.0%) | 18 866 |             |          |       |
| Lower                               | 7 836 (90.9%)  | 8 619  | 0.75        | 0.69     | 0.83  |
| <b>Relationship</b>                 |                |        |             |          |       |
| Not stable                          | 11 151 (92.0%) | 12 117 |             |          |       |
| Stable                              | 14 231 (92.6%) | 15 368 | 1.08        | 0.99     | 1.19  |
| <b>Healthcare Experience</b>        |                |        |             |          |       |
| No                                  | 15 416 (91.3%) | 16 886 |             |          |       |
| Yes                                 | 9 966 (94.0%)  | 10 599 | 1.50        | 1.36     | 1.65  |
| <b>Brain Research Participation</b> |                |        |             |          |       |
| No                                  | 14 422 (92.3%) | 15 619 |             |          |       |
| Yes                                 | 10 960 (92.4%) | 11 866 | 1.00        | 0.92     | 1.10  |
| <b>Cognitive Health</b>             |                |        |             |          |       |
| Average or above                    | 23 942 (92.7%) | 25 832 |             |          |       |
| Below average                       | 1 440 (87.1%)  | 1 653  | 0.53        | 0.46     | 0.62  |
| <b>Mental Health</b>                |                |        |             |          |       |
| Average or above                    | 22 069 (92.5%) | 23 866 |             |          |       |
| Below average                       | 3 313 (91.5%)  | 3 619  | 0.88        | 0.78     | 1.00  |
| <b>Illness Experience</b>           |                |        |             |          |       |
| No                                  | 15 240 (93.0%) | 16 395 |             |          |       |
| Yes                                 | 10 142 (91.5%) | 11 090 | 0.81        | 0.74     | 0.89  |
| <b>Brain Disease Caregiver</b>      |                |        |             |          |       |
| No                                  | 13 525 (92.0%) | 14 709 |             |          |       |
| Yes                                 | 11 857 (92.8%) | 12 776 | 1.13        | 1.03     | 1.24  |



Table 12. Q2 - in your opinion, is it important to look after one's *brain in the womb*?

| Variable\Subgroup                   | Descriptive    |        | Inferential |          |       |
|-------------------------------------|----------------|--------|-------------|----------|-------|
|                                     | positive       | n      | OR          | CI (95%) |       |
|                                     |                |        |             | lower    | upper |
| <b>Gender</b>                       |                |        |             |          |       |
| Woman                               | 16 698 (85.9%) | 19 433 | 1           |          |       |
| Man                                 | 6 006 (78.0%)  | 7 701  | 0.58        | 0.54     | 0.62  |
| Other/Undisclosed                   | 108 (86.4%)    | 125    | 1.04        | 0.62     | 1.74  |
| <b>Age</b>                          |                |        |             |          |       |
| >60                                 | 10 109 (80.7%) | 12 520 | 1           |          |       |
| 41-60                               | 8 852 (86.2%)  | 10 268 | 1.491       | 1.388    | 1.602 |
| <41                                 | 3 851 (86.1%)  | 4 471  | 1.481       | 1.346    | 1.630 |
| <b>Education</b>                    |                |        |             |          |       |
| Higher                              | 16 121 (86.0%) | 18 739 | 1           |          |       |
| Lower                               | 6 691 (78.5%)  | 8 520  | 0.59        | 0.56     | 0.63  |
| <b>Relationship</b>                 |                |        |             |          |       |
| Not stable                          | 10 008 (83.2%) | 12 027 | 1           |          |       |
| Stable                              | 12 804 (84.1%) | 15 232 | 1.06        | 1.00     | 1.13  |
| <b>Healthcare Experience</b>        |                |        |             |          |       |
| No                                  | 13 464 (80.5%) | 16 727 | 1           |          |       |
| Yes                                 | 9 348 (88.8%)  | 10 532 | 1.91        | 1.78     | 2.06  |
| <b>Brain Research Participation</b> |                |        |             |          |       |
| No                                  | 12 988 (83.9%) | 15 482 | 1           |          |       |
| Yes                                 | 9 824 (83.4%)  | 11 777 | 0.97        | 0.91     | 1.03  |
| <b>Cognitive Health</b>             |                |        |             |          |       |
| Average or above                    | 21 570 (84.2%) | 25 627 | 1           |          |       |
| Below average                       | 1 242 (76.1%)  | 1 632  | 0.60        | 0.53     | 0.67  |
| <b>Mental Health</b>                |                |        |             |          |       |
| Average or above                    | 19 867 (83.9%) | 23 666 | 1           |          |       |
| Below average                       | 2 945 (82.0%)  | 3 593  | 0.87        | 0.79     | 0.95  |
| <b>Illness Experience</b>           |                |        |             |          |       |
| No                                  | 13 636 (83.8%) | 16 271 | 1           |          |       |
| Yes                                 | 9 176 (83.5%)  | 10 988 | 0.98        | 0.92     | 1.04  |
| <b>Brain Disease Caregiver</b>      |                |        |             |          |       |
| No                                  | 11 975 (82.1%) | 14 577 | 1           |          |       |
| Yes                                 | 10 837 (85.5%) | 12 682 | 1.28        | 1.20     | 1.36  |

Table 13. Q2 - in your opinion, is it important to look after one's brain *in childhood?*

| Variable\Subgroup                   | Descriptive    |        | Inferential |          |       |
|-------------------------------------|----------------|--------|-------------|----------|-------|
|                                     | positive       | n      | OR          | CI (95%) |       |
|                                     |                |        |             | lower    | upper |
| <b>Gender</b>                       |                |        |             |          |       |
| Woman                               | 18 679 (95.7%) | 19 518 | 1           |          |       |
| Man                                 | 7 217 (93.0%)  | 7 764  | 0.59        | 0.53     | 0.66  |
| Other/Undisclosed                   | 119 (95.2%)    | 125    | 0.89        | 0.39     | 2.03  |
| <b>Age</b>                          |                |        |             |          |       |
| >60                                 | 11 791 (93.4%) | 12 626 | 1           |          |       |
| 41-60                               | 9 902 (96.2%)  | 10 297 | 1.78        | 1.57     | 2.01  |
| <41                                 | 4 322 (96.4%)  | 4 484  | 1.89        | 1.59     | 2.24  |
| <b>Education</b>                    |                |        |             |          |       |
| Higher                              | 18 042 (95.8%) | 18 828 | 1           |          |       |
| Lower                               | 7 973 (92.9%)  | 8 579  | 0.57        | 0.51     | 0.64  |
| <b>Relationship</b>                 |                |        |             |          |       |
| Not stable                          | 11 503 (95.2%) | 12 085 | 1           |          |       |
| Stable                              | 14 512 (94.7%) | 15 322 | 0.91        | 0.81     | 1.01  |
| <b>Healthcare Experience</b>        |                |        |             |          |       |
| No                                  | 15 773 (93.7%) | 16 831 | 1           |          |       |
| Yes                                 | 10 242 (96.8%) | 10 576 | 2.06        | 1.81     | 2.33  |
| <b>Brain Research Participation</b> |                |        |             |          |       |
| No                                  | 14 798 (95.1%) | 15 565 | 1           |          |       |
| Yes                                 | 11 217 (94.7%) | 11 842 | 0.93        | 0.83     | 1.04  |
| <b>Cognitive Health</b>             |                |        |             |          |       |
| Average or above                    | 24 506 (95.1%) | 25 760 | 1           |          |       |
| Below average                       | 1 509 (91.6%)  | 1 647  | 0.56        | 0.47     | 0.67  |
| <b>Mental Health</b>                |                |        |             |          |       |
| Average or above                    | 22 594 (94.9%) | 23 797 | 1           |          |       |
| Below average                       | 3 421 (94.8%)  | 3 610  | 0.96        | 0.82     | 1.13  |
| <b>Illness Experience</b>           |                |        |             |          |       |
| No                                  | 15 544 (95.1%) | 16 348 | 1           |          |       |
| Yes                                 | 10 471 (94.7%) | 11 059 | 0.92        | 0.83     | 1.03  |
| <b>Brain Disease Caregiver</b>      |                |        |             |          |       |
| No                                  | 13 912 (94.9%) | 14 662 | 1           |          |       |
| Yes                                 | 12 103 (95.0%) | 12 745 | 1.02        | 0.91     | 1.13  |

Table 14. Q2 - in your opinion, is it important to look after one's brain *in adolescence?*

| Variable\Subgroup                   | Descriptive    |        | OR   | Inferential |       |
|-------------------------------------|----------------|--------|------|-------------|-------|
|                                     | positive       | n      |      | CI (95%)    |       |
|                                     |                |        |      | lower       | upper |
| <b>Gender</b>                       |                |        |      |             |       |
| Woman                               | 18 923 (97.0%) | 19 512 | 1    |             |       |
| Man                                 | 7 433 (95.6%)  | 7 774  | 0.68 | 0.59        | 0.78  |
| Other/Undisclosed                   | 120 (96.0%)    | 125    | 0.75 | 0.30        | 1.83  |
| <b>Age</b>                          |                |        |      |             |       |
| >60                                 | 12 074 (95.5%) | 12 639 | 1    |             |       |
| 41-60                               | 10 019 (97.3%) | 10 293 | 1.71 | 1.48        | 1.98  |
| <41                                 | 4 383 (97.9%)  | 4 479  | 2.14 | 1.72        | 2.66  |
| <b>Education</b>                    |                |        |      |             |       |
| Higher                              | 18 268 (97.0%) | 18 827 | 1    |             |       |
| Lower                               | 8 208 (95.6%)  | 8 584  | 0.67 | 0.58        | 0.76  |
| <b>Relationship</b>                 |                |        |      |             |       |
| Not stable                          | 11 704 (96.8%) | 12 087 | 1    |             |       |
| Stable                              | 14 772 (96.4%) | 15 324 | 0.88 | 0.77        | 1.00  |
| <b>Healthcare Experience</b>        |                |        |      |             |       |
| No                                  | 16 146 (95.9%) | 16 835 | 1    |             |       |
| Yes                                 | 10 330 (97.7%) | 10 576 | 1.79 | 1.55        | 2.08  |
| <b>Brain Research Participation</b> |                |        |      |             |       |
| No                                  | 15 050 (96.7%) | 15 571 | 1    |             |       |
| Yes                                 | 11 426 (96.5%) | 11 840 | 0.96 | 0.84        | 1.09  |
| <b>Cognitive Health</b>             |                |        |      |             |       |
| Average or above                    | 24 934 (96.8%) | 25 766 | 1    |             |       |
| Below average                       | 1 542 (93.7%)  | 1 645  | 0.50 | 0.40        | 0.62  |
| <b>Mental Health</b>                |                |        |      |             |       |
| Average or above                    | 22 998 (96.6%) | 23 798 | 1    |             |       |
| Below average                       | 3 478 (96.3%)  | 3 613  | 0.90 | 0.74        | 1.08  |
| <b>Illness Experience</b>           |                |        |      |             |       |
| No                                  | 15 795 (96.6%) | 16 351 | 1    |             |       |
| Yes                                 | 10 681 (96.6%) | 11 060 | 0.99 | 0.87        | 1.13  |
| <b>Brain Disease Caregiver</b>      |                |        |      |             |       |
| No                                  | 14 168 (96.6%) | 14 668 | 1    |             |       |
| Yes                                 | 12 308 (96.6%) | 12 743 | 1.00 | 0.88        | 1.14  |

Table 15. Q2 - in your opinion, is it important to look after one's *brain in young adulthood?*

| Variable\Subgroup                   | Descriptive    |        | Inferential |          |       |
|-------------------------------------|----------------|--------|-------------|----------|-------|
|                                     | positive       | n      | OR          | CI (95%) |       |
|                                     |                |        |             | lower    | upper |
| <b>Gender</b>                       |                |        |             |          |       |
| Woman                               | 18 769 (96.2%) | 19 505 | 1           |          |       |
| Man                                 | 7 257 (93.4%)  | 7 767  | 0.56        | 0.50     | 0.63  |
| Other/Undisclosed                   | 116 (92.8%)    | 125    | 0.51        | 0.26     | 1.00  |
| <b>Age</b>                          |                |        |             |          |       |
| >60                                 | 11 941 (94.5%) | 12 631 | 1           |          |       |
| 41-60                               | 9 925 (96.5%)  | 10 286 | 1.59        | 1.40     | 1.81  |
| <41                                 | 4 276 (95.4%)  | 4 480  | 1.21        | 1.03     | 1.42  |
| <b>Education</b>                    |                |        |             |          |       |
| Higher                              | 17 946 (95.3%) | 18 822 | 1           |          |       |
| Lower                               | 8 196 (95.6%)  | 8 575  | 1.06        | 0.93     | 1.19  |
| <b>Relationship</b>                 |                |        |             |          |       |
| Not stable                          | 11 511 (95.3%) | 12 085 | 1           |          |       |
| Stable                              | 14 631 (95.6%) | 15 312 | 1.07        | 0.96     | 1.20  |
| <b>Healthcare Experience</b>        |                |        |             |          |       |
| No                                  | 15 927 (94.7%) | 16 823 | 1           |          |       |
| Yes                                 | 10 215 (96.6%) | 10 574 | 1.60        | 1.41     | 1.81  |
| <b>Brain Research Participation</b> |                |        |             |          |       |
| No                                  | 14 847 (95.5%) | 15 546 | 1           |          |       |
| Yes                                 | 11 295 (95.3%) | 11 851 | 0.96        | 0.85     | 1.07  |
| <b>Cognitive Health</b>             |                |        |             |          |       |
| Average or above                    | 24 608 (95.6%) | 25 754 | 1           |          |       |
| Below average                       | 1 534 (93.4%)  | 1 643  | 0.66        | 0.53     | 0.80  |
| <b>Mental Health</b>                |                |        |             |          |       |
| Average or above                    | 22 725 (95.5%) | 23 787 | 1           |          |       |
| Below average                       | 3 417 (94.7%)  | 3 610  | 0.83        | 0.71     | 0.97  |
| <b>Illness Experience</b>           |                |        |             |          |       |
| No                                  | 15 563 (95.2%) | 16 347 | 1           |          |       |
| Yes                                 | 10 579 (95.7%) | 11 050 | 1.13        | 1.01     | 1.27  |
| <b>Brain Disease Caregiver</b>      |                |        |             |          |       |
| No                                  | 13 920 (95.0%) | 14 654 | 1           |          |       |
| Yes                                 | 12 222 (95.9%) | 12 743 | 1.24        | 1.10     | 1.39  |

Table 16. Q2 - in your opinion, is it important to look after one's brain *in middle age*?

| Variable\Subgroup                   | Descriptive    |        | OR    | Inferential<br>CI (95%) |       |
|-------------------------------------|----------------|--------|-------|-------------------------|-------|
|                                     | positive       | n      |       | lower                   | upper |
| <b>Gender</b>                       |                |        |       |                         |       |
| Woman                               | 18 951 (97.0%) | 19 536 | 1     |                         |       |
| Man                                 | 7 230 (93.0%)  | 7 773  | 0.41  | 0.36                    | 0.46  |
| Other/Undisclosed                   | 111 (88.8%)    | 125    | 0.24  | 0.14                    | 0.43  |
| <b>Age</b>                          |                |        |       |                         |       |
| >60                                 | 12 064 (95.3%) | 12 659 | 1     |                         |       |
| 41-60                               | 10 004 (97.2%) | 10 297 | 1.684 | 1.460                   | 1.942 |
| <41                                 | 4 224 (94.3%)  | 4 478  | 0.820 | 0.705                   | 0.954 |
| <b>Education</b>                    |                |        |       |                         |       |
| Higher                              | 18 078 (95.9%) | 18 844 | 1     |                         |       |
| Lower                               | 8 214 (95.6%)  | 8 590  | 0.93  | 0.82                    | 1.05  |
| <b>Relationship</b>                 |                |        |       |                         |       |
| Not stable                          | 11 564 (95.6%) | 12 097 | 1     |                         |       |
| Stable                              | 14 728 (96.0%) | 15 337 | 1.11  | 0.99                    | 1.26  |
| <b>Healthcare Experience</b>        |                |        |       |                         |       |
| No                                  | 16 036 (95.2%) | 16 842 | 1     |                         |       |
| Yes                                 | 10 256 (96.8%) | 10 592 | 1.53  | 1.35                    | 1.75  |
| <b>Brain Research Participation</b> |                |        |       |                         |       |
| No                                  | 14 907 (95.8%) | 15 567 | 1     |                         |       |
| Yes                                 | 11 385 (95.9%) | 11 867 | 1.05  | 0.93                    | 1.18  |
| <b>Cognitive Health</b>             |                |        |       |                         |       |
| Average or above                    | 24 746 (96.0%) | 25 788 | 1     |                         |       |
| Below average                       | 1 546 (93.9%)  | 1 646  | 0.65  | 0.53                    | 0.80  |
| <b>Mental Health</b>                |                |        |       |                         |       |
| Average or above                    | 22 877 (96.0%) | 23 818 | 1     |                         |       |
| Below average                       | 3 415 (94.4%)  | 3 616  | 0.70  | 0.60                    | 0.82  |
| <b>Illness Experience</b>           |                |        |       |                         |       |
| No                                  | 15 651 (95.6%) | 16 365 | 1     |                         |       |
| Yes                                 | 10 641 (96.1%) | 11 069 | 1.13  | 1.00                    | 1.28  |
| <b>Brain Disease Caregiver</b>      |                |        |       |                         |       |
| No                                  | 13 943 (95.1%) | 14 668 | 1     |                         |       |
| Yes                                 | 12 349 (96.7%) | 12 766 | 1.54  | 1.36                    | 1.74  |

Table 17. Q2 - in your opinion, is it important to look after one's brain *in old age*?

| Variable\Subgroup                   | Descriptive    |        | OR   | Inferential |       |
|-------------------------------------|----------------|--------|------|-------------|-------|
|                                     | positive       | n      |      | CI (95%)    |       |
|                                     |                |        |      | lower       | upper |
| <b>Gender</b>                       |                |        |      |             |       |
| Woman                               | 18 970 (97.1%) | 19 545 | 1    |             |       |
| Man                                 | 7 251 (93.2%)  | 7 781  | 0.41 | 0.37        | 0.47  |
| Other/Undisclosed                   | 115 (92.0%)    | 125    | 0.35 | 0.18        | 0.67  |
| <b>Age</b>                          |                |        |      |             |       |
| >60                                 | 12 193 (96.2%) | 12 675 | 1    |             |       |
| 41-60                               | 9 962 (96.8%)  | 10 294 | 1.19 | 1.03        | 1.37  |
| <41                                 | 4 181 (93.3%)  | 4 482  | 0.55 | 0.47        | 0.64  |
| <b>Education</b>                    |                |        |      |             |       |
| Higher                              | 18 140 (96.2%) | 18 851 | 1    |             |       |
| Lower                               | 8 196 (95.3%)  | 8 600  | 0.80 | 0.70        | 0.90  |
| <b>Relationship</b>                 |                |        |      |             |       |
| Not stable                          | 11 564 (95.5%) | 12 106 | 1    |             |       |
| Stable                              | 14 772 (96.3%) | 15 345 | 1.21 | 1.07        | 1.36  |
| <b>Healthcare Experience</b>        |                |        |      |             |       |
| No                                  | 16 092 (95.4%) | 16 861 | 1    |             |       |
| Yes                                 | 10 244 (96.7%) | 10 590 | 1.41 | 1.24        | 1.61  |
| <b>Brain Research Participation</b> |                |        |      |             |       |
| No                                  | 14 899 (95.6%) | 15 580 | 1    |             |       |
| Yes                                 | 11 437 (96.3%) | 11 871 | 1.20 | 1.07        | 1.36  |
| <b>Cognitive Health</b>             |                |        |      |             |       |
| Average or above                    | 24 789 (96.1%) | 25 807 | 1    |             |       |
| Below average                       | 1 547 (94.1%)  | 1 644  | 0.65 | 0.53        | 0.81  |
| <b>Mental Health</b>                |                |        |      |             |       |
| Average or above                    | 22 930 (96.2%) | 23 838 | 1    |             |       |
| Below average                       | 3 406 (94.3%)  | 3 613  | 0.65 | 0.56        | 0.76  |
| <b>Illness Experience</b>           |                |        |      |             |       |
| No                                  | 15 691 (95.8%) | 16 382 | 1    |             |       |
| Yes                                 | 10 645 (96.2%) | 11 069 | 1.11 | 0.98        | 1.25  |
| <b>Brain Disease Caregiver</b>      |                |        |      |             |       |
| No                                  | 13 994 (95.3%) | 14 680 | 1    |             |       |
| Yes                                 | 12 342 (96.6%) | 12 771 | 1.41 | 1.25        | 1.59  |

Table 18. Q3 - I associate *Alzheimer's disease and other forms of dementia* with the brain\*

\*age-groups exclude non-responders to Q3

| Variable\Subgroup                   | Descriptive    |        | OR   | Inferential |       |
|-------------------------------------|----------------|--------|------|-------------|-------|
|                                     | positive       | n      |      | CI (95%)    |       |
|                                     |                |        |      | lower       | upper |
| <b>Gender</b>                       |                |        |      |             |       |
| Woman                               | 19 467 (99.2%) | 19 626 | 1    |             |       |
| Man                                 | 7 695 (98.2%)  | 7 833  | 0.46 | 0.36        | 0.57  |
| Other/Undisclosed                   | 126 (96.2%)    | 131    | 0.21 | 0.08        | 0.51  |
| <b>Age</b>                          |                |        |      |             |       |
| >60                                 | 12 649 (99.3%) | 12 737 | 1    |             |       |
| 41-60                               | 10 248 (99.4%) | 10 314 | 1.08 | 0.78        | 1.49  |
| <41                                 | 4 391 (98.0%)  | 4 479  | 0.35 | 0.26        | 0.47  |
| <b>Education</b>                    |                |        |      |             |       |
| Higher                              | 18 765 (99.2%) | 18 925 | 1    |             |       |
| Lower                               | 8 523 (98.4%)  | 8 665  | 0.51 | 0.41        | 0.64  |
| <b>Relationship</b>                 |                |        |      |             |       |
| Not stable                          | 11 992 (98.5%) | 12 177 | 1    |             |       |
| Stable                              | 15 296 (99.2%) | 15 413 | 2.02 | 1.60        | 2.55  |
| <b>Healthcare Experience</b>        |                |        |      |             |       |
| No                                  | 16 723 (98.6%) | 16 955 | 1    |             |       |
| Yes                                 | 10 565 (99.3%) | 10 635 | 2.09 | 1.60        | 2.74  |
| <b>Brain Research Participation</b> |                |        |      |             |       |
| No                                  | 15 453 (98.6%) | 15 671 | 1    |             |       |
| Yes                                 | 11 835 (99.3%) | 11 919 | 1.99 | 1.54        | 2.56  |
| <b>Cognitive Health</b>             |                |        |      |             |       |
| Average or above                    | 25 654 (98.9%) | 25 929 | 1    |             |       |
| Below average                       | 1 634 (98.4%)  | 1 661  | 0.65 | 0.44        | 0.97  |
| <b>Mental Health</b>                |                |        |      |             |       |
| Average or above                    | 23 713 (99.0%) | 23 958 | 1    |             |       |
| Below average                       | 3 575 (98.4%)  | 3 632  | 0.65 | 0.48        | 0.87  |
| <b>Illness Experience</b>           |                |        |      |             |       |
| No                                  | 16 287 (99.0%) | 16 451 | 1    |             |       |
| Yes                                 | 11 001 (98.8%) | 11 139 | 0.80 | 0.64        | 1.01  |
| <b>Brain Disease Caregiver</b>      |                |        |      |             |       |
| No                                  | 14 545 (98.5%) | 14 762 | 1    |             |       |
| Yes                                 | 12 743 (99.3%) | 12 828 | 2.24 | 1.74        | 2.88  |

Table 19. Q3 - I associate *schizophrenia* with the brain

| Variable\Subgroup                   | Descriptive    |        | OR   | Inferential |       |
|-------------------------------------|----------------|--------|------|-------------|-------|
|                                     | positive       | n      |      | CI (95%)    |       |
|                                     |                |        |      | lower       | upper |
| <b>Gender</b>                       |                |        |      |             |       |
| Woman                               | 18 893 (96.3%) | 19 626 | 1    |             |       |
| Man                                 | 7 389 (94.3%)  | 7 833  | 0.65 | 0.57        | 0.73  |
| Other/Undisclosed                   | 120 (91.6%)    | 131    | 0.42 | 0.23        | 0.79  |
| <b>Age</b>                          |                |        |      |             |       |
| >60                                 | 12 119 (95.1%) | 12 737 | 1    |             |       |
| 41-60                               | 9 968 (96.6%)  | 10 314 | 1.47 | 1.29        | 1.68  |
| <41                                 | 4 315 (96.3%)  | 4 479  | 1.34 | 1.13        | 1.60  |
| <b>Education</b>                    |                |        |      |             |       |
| Higher                              | 18 235 (96.4%) | 18 925 | 1    |             |       |
| Lower                               | 8 167 (94.3%)  | 8 665  | 0.62 | 0.55        | 0.70  |
| <b>Relationship</b>                 |                |        |      |             |       |
| Not stable                          | 11 651 (95.7%) | 12 177 | 1    |             |       |
| Stable                              | 14 751 (95.7%) | 15 413 | 1.01 | 0.89        | 1.13  |
| <b>Healthcare Experience</b>        |                |        |      |             |       |
| No                                  | 16 119 (95.1%) | 16 955 | 1    |             |       |
| Yes                                 | 10 283 (96.7%) | 10 635 | 1.52 | 1.33        | 1.72  |
| <b>Brain Research Participation</b> |                |        |      |             |       |
| No                                  | 14 906 (95.1%) | 15 671 | 1    |             |       |
| Yes                                 | 11 496 (96.5%) | 11 919 | 1.39 | 1.24        | 1.57  |
| <b>Cognitive Health</b>             |                |        |      |             |       |
| Average or above                    | 24 876 (95.9%) | 25 929 | 1    |             |       |
| Below average                       | 1 526 (91.9%)  | 1 661  | 0.48 | 0.40        | 0.58  |
| <b>Mental Health</b>                |                |        |      |             |       |
| Average or above                    | 22 929 (95.7%) | 23 958 | 1    |             |       |
| Below average                       | 3 473 (95.6%)  | 3 632  | 0.98 | 0.83        | 1.16  |
| <b>Illness Experience</b>           |                |        |      |             |       |
| No                                  | 15 781 (95.9%) | 16 451 | 1    |             |       |
| Yes                                 | 10 621 (95.3%) | 11 139 | 0.87 | 0.77        | 0.98  |
| <b>Brain Disease Caregiver</b>      |                |        |      |             |       |
| No                                  | 14 059 (95.2%) | 14 762 | 1    |             |       |
| Yes                                 | 12 343 (96.2%) | 12 828 | 1.27 | 1.13        | 1.43  |



Table 20. Q3 - I associate *depression* with the brain

| Variable\Subgroup                   | Descriptive    |        | OR   | Inferential<br>CI (95%) |       |
|-------------------------------------|----------------|--------|------|-------------------------|-------|
|                                     | positive       | n      |      | lower                   | upper |
| <b>Gender</b>                       |                |        |      |                         |       |
| Woman                               | 18 731 (95.4%) | 19 626 | 1    |                         |       |
| Man                                 | 7 332 (93.6%)  | 7 833  | 0.70 | 0.62                    | 0.78  |
| Other/Undisclosed                   | 121 (92.4%)    | 131    | 0.58 | 0.30                    | 1.11  |
| <b>Age</b>                          |                |        |      |                         |       |
| >60                                 | 11 998 (94.2%) | 12 737 | 1    |                         |       |
| 41-60                               | 9 911 (96.1%)  | 10 314 | 1.52 | 1.34                    | 1.72  |
| <41                                 | 4 275 (95.4%)  | 4 479  | 1.29 | 1.10                    | 1.51  |
| <b>Education</b>                    |                |        |      |                         |       |
| Higher                              | 18 060 (95.4%) | 18 925 | 1    |                         |       |
| Lower                               | 8 124 (93.8%)  | 8 665  | 0.72 | 0.64                    | 0.80  |
| <b>Relationship</b>                 |                |        |      |                         |       |
| Not stable                          | 11 549 (94.8%) | 12 177 | 1    |                         |       |
| Stable                              | 14 635 (95.0%) | 15 413 | 1.02 | 0.92                    | 1.14  |
| <b>Healthcare Experience</b>        |                |        |      |                         |       |
| No                                  | 15 993 (94.3%) | 16 955 | 1    |                         |       |
| Yes                                 | 10 191 (95.8%) | 10 635 | 1.38 | 1.23                    | 1.55  |
| <b>Brain Research Participation</b> |                |        |      |                         |       |
| No                                  | 14 770 (94.3%) | 15 671 | 1    |                         |       |
| Yes                                 | 11 414 (95.8%) | 11 919 | 1.38 | 1.23                    | 1.54  |
| <b>Cognitive Health</b>             |                |        |      |                         |       |
| Average or above                    | 24 636 (95.0%) | 25 929 | 1    |                         |       |
| Below average                       | 1 548 (93.2%)  | 1 661  | 0.72 | 0.59                    | 0.88  |
| <b>Mental Health</b>                |                |        |      |                         |       |
| Average or above                    | 22 696 (94.7%) | 23 958 | 1    |                         |       |
| Below average                       | 3 488 (96.0%)  | 3 632  | 1.35 | 1.13                    | 1.61  |
| <b>Illness Experience</b>           |                |        |      |                         |       |
| No                                  | 15 607 (94.9%) | 16 451 | 1    |                         |       |
| Yes                                 | 10 577 (95.0%) | 11 139 | 1.02 | 0.91                    | 1.14  |
| <b>Brain Disease Caregiver</b>      |                |        |      |                         |       |
| No                                  | 13 929 (94.4%) | 14 762 | 1    |                         |       |
| Yes                                 | 12 255 (95.5%) | 12 828 | 1.28 | 1.15                    | 1.43  |

Table 21. Q3 - I associate *bipolar disorder* with the brain

| Variable\Subgroup                   | Descriptive    |        | OR   | Inferential<br>CI (95%) |       |
|-------------------------------------|----------------|--------|------|-------------------------|-------|
|                                     | positive       | n      |      | lower                   | upper |
| <b>Gender</b>                       |                |        |      |                         |       |
| Woman                               | 18 332 (93.4%) | 19 626 | 1    |                         |       |
| Man                                 | 6 826 (87.1%)  | 7 833  | 0.48 | 0.44                    | 0.52  |
| Other/Undisclosed                   | 118 (90.1%)    | 131    | 0.64 | 0.36                    | 1.14  |
| <b>Age</b>                          |                |        |      |                         |       |
| >60                                 | 11 321 (88.9%) | 12 737 | 1    |                         |       |
| 41-60                               | 9 753 (94.6%)  | 10 314 | 2.17 | 1.97                    | 2.41  |
| <41                                 | 4 202 (93.8%)  | 4 479  | 1.90 | 1.66                    | 2.17  |
| <b>Education</b>                    |                |        |      |                         |       |
| Higher                              | 17 762 (93.9%) | 18 925 | 1    |                         |       |
| Lower                               | 7 514 (86.7%)  | 8 665  | 0.43 | 0.39                    | 0.47  |
| <b>Relationship</b>                 |                |        |      |                         |       |
| Not stable                          | 11 232 (92.2%) | 12 177 | 1    |                         |       |
| Stable                              | 14 044 (91.1%) | 15 413 | 0.86 | 0.79                    | 0.94  |
| <b>Healthcare Experience</b>        |                |        |      |                         |       |
| No                                  | 15 219 (89.8%) | 16 955 | 1    |                         |       |
| Yes                                 | 10 057 (94.6%) | 10 635 | 1.98 | 1.80                    | 2.19  |
| <b>Brain Research Participation</b> |                |        |      |                         |       |
| No                                  | 14 149 (90.3%) | 15 671 | 1    |                         |       |
| Yes                                 | 11 127 (93.4%) | 11 919 | 1.51 | 1.38                    | 1.65  |
| <b>Cognitive Health</b>             |                |        |      |                         |       |
| Average or above                    | 23 826 (91.9%) | 25 929 | 1    |                         |       |
| Below average                       | 1 450 (87.3%)  | 1 661  | 0.61 | 0.52                    | 0.71  |
| <b>Mental Health</b>                |                |        |      |                         |       |
| Average or above                    | 21 896 (91.4%) | 23 958 | 1    |                         |       |
| Below average                       | 3 380 (93.1%)  | 3 632  | 1.26 | 1.10                    | 1.45  |
| <b>Illness Experience</b>           |                |        |      |                         |       |
| No                                  | 15 072 (91.6%) | 16 451 | 1    |                         |       |
| Yes                                 | 10 204 (91.6%) | 11 139 | 1.00 | 0.92                    | 1.09  |
| <b>Brain Disease Caregiver</b>      |                |        |      |                         |       |
| No                                  | 13 311 (90.2%) | 14 762 | 1    |                         |       |
| Yes                                 | 11 965 (93.3%) | 12 828 | 1.51 | 1.38                    | 1.65  |

Table 22. Q3 - I associate *anxiety* with the brain

| Variable\Subgroup                   | Descriptive    |        | OR   | Inferential<br>CI (95%) |       |
|-------------------------------------|----------------|--------|------|-------------------------|-------|
|                                     | positive       | n      |      | lower                   | upper |
| <b>Gender</b>                       |                |        |      |                         |       |
| Woman                               | 17 905 (91.2%) | 19 626 | 1    |                         |       |
| Man                                 | 6 987 (89.2%)  | 7 833  | 0.79 | 0.73                    | 0.87  |
| Other/Undisclosed                   | 120 (91.6%)    | 131    | 1.05 | 0.56                    | 1.95  |
| <b>Age</b>                          |                |        |      |                         |       |
| >60                                 | 11 336 (89.0%) | 12 737 | 1    |                         |       |
| 41-60                               | 9 550 (92.6%)  | 10 314 | 1.55 | 1.41                    | 1.69  |
| <41                                 | 4 126 (92.1%)  | 4 479  | 1.45 | 1.28                    | 1.63  |
| <b>Education</b>                    |                |        |      |                         |       |
| Higher                              | 17 310 (91.5%) | 18 925 | 1    |                         |       |
| Lower                               | 7 702 (88.9%)  | 8 665  | 0.75 | 0.69                    | 0.81  |
| <b>Relationship</b>                 |                |        |      |                         |       |
| Not stable                          | 11 027 (90.6%) | 12 177 | 1    |                         |       |
| Stable                              | 13 985 (90.7%) | 15 413 | 1.02 | 0.94                    | 1.11  |
| <b>Healthcare Experience</b>        |                |        |      |                         |       |
| No                                  | 15 250 (89.9%) | 16 955 | 1    |                         |       |
| Yes                                 | 9 762 (91.8%)  | 10 635 | 1.25 | 1.15                    | 1.36  |
| <b>Brain Research Participation</b> |                |        |      |                         |       |
| No                                  | 14 048 (89.6%) | 15 671 | 1    |                         |       |
| Yes                                 | 10 964 (92.0%) | 11 919 | 1.33 | 1.22                    | 1.44  |
| <b>Cognitive Health</b>             |                |        |      |                         |       |
| Average or above                    | 23 536 (90.8%) | 25 929 | 1    |                         |       |
| Below average                       | 1 476 (88.9%)  | 1 661  | 0.81 | 0.69                    | 0.95  |
| <b>Mental Health</b>                |                |        |      |                         |       |
| Average or above                    | 21 627 (90.3%) | 23 958 | 1    |                         |       |
| Below average                       | 3 385 (93.2%)  | 3 632  | 1.48 | 1.29                    | 1.69  |
| <b>Illness Experience</b>           |                |        |      |                         |       |
| No                                  | 14 870 (90.4%) | 16 451 | 1    |                         |       |
| Yes                                 | 10 142 (91.0%) | 11 139 | 1.08 | 1.00                    | 1.18  |
| <b>Brain Disease Caregiver</b>      |                |        |      |                         |       |
| No                                  | 13 266 (89.9%) | 14 762 | 1    |                         |       |
| Yes                                 | 11 746 (91.6%) | 12 828 | 1.22 | 1.13                    | 1.33  |

Table 23. Q3 - I associate *addiction (e.g. drugs, alcohol)* with the brain

| Variable\Subgroup                   | Descriptive    |        | OR   | Inferential |       |
|-------------------------------------|----------------|--------|------|-------------|-------|
|                                     | positive       | n      |      | CI (95%)    |       |
|                                     |                |        |      | lower       | upper |
| <b>Gender</b>                       |                |        |      |             |       |
| Woman                               | 17 634 (89.9%) | 19 626 | 1    |             |       |
| Man                                 | 6 599 (84.2%)  | 7 833  | 0.60 | 0.56        | 0.65  |
| Other/Undisclosed                   | 114 (87.0%)    | 131    | 0.76 | 0.45        | 1.26  |
| <b>Age</b>                          |                |        |      |             |       |
| >60                                 | 11 025 (86.6%) | 12 737 | 1    |             |       |
| 41-60                               | 9 263 (89.8%)  | 10 314 | 1.37 | 1.26        | 1.49  |
| <41                                 | 4 059 (90.6%)  | 4 479  | 1.50 | 1.34        | 1.68  |
| <b>Education</b>                    |                |        |      |             |       |
| Higher                              | 17 005 (89.9%) | 18 925 | 1    |             |       |
| Lower                               | 7 342 (84.7%)  | 8 665  | 0.63 | 0.58        | 0.68  |
| <b>Relationship</b>                 |                |        |      |             |       |
| Not stable                          | 10 825 (88.9%) | 12 177 | 1    |             |       |
| Stable                              | 13 522 (87.7%) | 15 413 | 0.89 | 0.83        | 0.96  |
| <b>Healthcare Experience</b>        |                |        |      |             |       |
| No                                  | 14 542 (85.8%) | 16 955 | 1    |             |       |
| Yes                                 | 9 805 (92.2%)  | 10 635 | 1.96 | 1.80        | 2.13  |
| <b>Brain Research Participation</b> |                |        |      |             |       |
| No                                  | 13 645 (87.1%) | 15 671 | 1    |             |       |
| Yes                                 | 10 702 (89.8%) | 11 919 | 1.31 | 1.21        | 1.41  |
| <b>Cognitive Health</b>             |                |        |      |             |       |
| Average or above                    | 22 952 (88.5%) | 25 929 | 1    |             |       |
| Below average                       | 1 395 (84.0%)  | 1 661  | 0.68 | 0.59        | 0.78  |
| <b>Mental Health</b>                |                |        |      |             |       |
| Average or above                    | 21 109 (88.1%) | 23 958 | 1    |             |       |
| Below average                       | 3 238 (89.2%)  | 3 632  | 1.11 | 0.99        | 1.24  |
| <b>Illness Experience</b>           |                |        |      |             |       |
| No                                  | 14 492 (88.1%) | 16 451 | 1    |             |       |
| Yes                                 | 9 855 (88.5%)  | 11 139 | 1.04 | 0.96        | 1.12  |
| <b>Brain Disease Caregiver</b>      |                |        |      |             |       |
| No                                  | 12 859 (87.1%) | 14 762 | 1    |             |       |
| Yes                                 | 11 488 (89.6%) | 12 828 | 1.27 | 1.18        | 1.37  |

Table 24. Q3 - I associate *stroke* with the brain

| Variable\Subgroup                   | Descriptive    |        | Inferential |          |       |
|-------------------------------------|----------------|--------|-------------|----------|-------|
|                                     | positive       | n      | OR          | CI (95%) |       |
|                                     |                |        |             | lower    | upper |
| <b>Gender</b>                       |                |        |             |          |       |
| Woman                               | 17 612 (89.7%) | 19 626 | 1           |          |       |
| Man                                 | 6 440 (82.2%)  | 7 833  | 0.53        | 0.49     | 0.57  |
| Other/Undisclosed                   | 113 (86.3%)    | 131    | 0.72        | 0.44     | 1.18  |
| <b>Age</b>                          |                |        |             |          |       |
| >60                                 | 11 174 (87.7%) | 12 737 | 1           |          |       |
| 41-60                               | 9 206 (89.3%)  | 10 314 | 1.16        | 1.07     | 1.26  |
| <41                                 | 3 785 (84.5%)  | 4 479  | 0.76        | 0.69     | 0.84  |
| <b>Education</b>                    |                |        |             |          |       |
| Higher                              | 16 671 (88.1%) | 18 925 | 1           |          |       |
| Lower                               | 7 494 (86.5%)  | 8 665  | 0.87        | 0.80     | 0.93  |
| <b>Relationship</b>                 |                |        |             |          |       |
| Not stable                          | 10 537 (86.5%) | 12 177 | 1           |          |       |
| Stable                              | 13 628 (88.4%) | 15 413 | 1.19        | 1.11     | 1.28  |
| <b>Healthcare Experience</b>        |                |        |             |          |       |
| No                                  | 14 292 (84.3%) | 16 955 | 1           |          |       |
| Yes                                 | 9 873 (92.8%)  | 10 635 | 2.41        | 2.22     | 2.63  |
| <b>Brain Research Participation</b> |                |        |             |          |       |
| No                                  | 13 555 (86.5%) | 15 671 | 1           |          |       |
| Yes                                 | 10 610 (89.0%) | 11 919 | 1.27        | 1.18     | 1.36  |
| <b>Cognitive Health</b>             |                |        |             |          |       |
| Average or above                    | 22 748 (87.7%) | 25 929 | 1           |          |       |
| Below average                       | 1 417 (85.3%)  | 1 661  | 0.81        | 0.71     | 0.93  |
| <b>Mental Health</b>                |                |        |             |          |       |
| Average or above                    | 21 018 (87.7%) | 23 958 | 1           |          |       |
| Below average                       | 3 147 (86.6%)  | 3 632  | 0.91        | 0.82     | 1.01  |
| <b>Illness Experience</b>           |                |        |             |          |       |
| No                                  | 14 228 (86.5%) | 16 451 | 1           |          |       |
| Yes                                 | 9 937 (89.2%)  | 11 139 | 1.29        | 1.20     | 1.39  |
| <b>Brain Disease Caregiver</b>      |                |        |             |          |       |
| No                                  | 12 575 (85.2%) | 14 762 | 1           |          |       |
| Yes                                 | 11 590 (90.3%) | 12 828 | 1.63        | 1.51     | 1.75  |

Table 25. Q3 - I associate *Parkinson's disease* with the brain

| Variable\Subgroup                   | Descriptive    |        | Inferential |          |       |
|-------------------------------------|----------------|--------|-------------|----------|-------|
|                                     | positive       | n      | OR          | CI (95%) |       |
|                                     |                |        |             | lower    | upper |
| <b>Gender</b>                       |                |        |             |          |       |
| Woman                               | 17 017 (86.7%) | 19 626 | 1           |          |       |
| Man                                 | 6 585 (84.1%)  | 7 833  | 0.81        | 0.75     | 0.87  |
| Other/Undisclosed                   | 107 (81.7%)    | 131    | 0.68        | 0.44     | 1.07  |
| <b>Age</b>                          |                |        |             |          |       |
| >60                                 | 10 961 (86.1%) | 12 737 | 1           |          |       |
| 41-60                               | 9 021 (87.5%)  | 10 314 | 1.13        | 1.05     | 1.22  |
| <41                                 | 3 727 (82.2%)  | 4 479  | 0.80        | 0.73     | 0.88  |
| <b>Education</b>                    |                |        |             |          |       |
| Higher                              | 16 612 (87.8%) | 18 925 |             |          |       |
| Lower                               | 7 097 (81.9%)  | 8 665  | 0.63        | 0.59     | 0.68  |
| <b>Relationship</b>                 |                |        |             |          |       |
| Not stable                          | 10 314 (84.7%) | 12 177 | 1           |          |       |
| Stable                              | 13 395 (86.9%) | 15 413 | 1.20        | 1.12     | 1.28  |
| <b>Healthcare Experience</b>        |                |        |             |          |       |
| No                                  | 14 054 (82.9%) | 16 955 | 1           |          |       |
| Yes                                 | 9 655 (90.8%)  | 10 635 | 2.03        | 1.88     | 2.20  |
| <b>Brain Research Participation</b> |                |        |             |          |       |
| No                                  | 13 190 (84.2%) | 15 671 | 1           |          |       |
| Yes                                 | 10 519 (88.3%) | 11 919 | 1.41        | 1.32     | 1.52  |
| <b>Cognitive Health</b>             |                |        |             |          |       |
| Average or above                    | 22 337 (86.1%) | 25 929 | 1           |          |       |
| Below average                       | 1 372 (82.6%)  | 1 661  | 0.76        | 0.67     | 0.87  |
| <b>Mental Health</b>                |                |        |             |          |       |
| Average or above                    | 20 658 (86.2%) | 23 958 | 1           |          |       |
| Below average                       | 3 051 (84.0%)  | 3 632  | 0.84        | 0.76     | 0.92  |
| <b>Illness Experience</b>           |                |        |             |          |       |
| No                                  | 14 066 (85.5%) | 16 451 | 1           |          |       |
| Yes                                 | 9 643 (86.6%)  | 11 139 | 1.09        | 1.02     | 1.17  |
| <b>Brain Disease Caregiver</b>      |                |        |             |          |       |
| No                                  | 12 381 (83.9%) | 14 762 | 1           |          |       |
| Yes                                 | 11 328 (88.3%) | 12 828 | 1.45        | 1.35     | 1.56  |

Table 26. Q3 - I associate *migraine* with the brain

| Variable\Subgroup                   | Descriptive    |        | OR   | Inferential |       |
|-------------------------------------|----------------|--------|------|-------------|-------|
|                                     | positive       | n      |      | CI (95%)    |       |
|                                     |                |        |      | lower       | upper |
| <b>Gender</b>                       |                |        |      |             |       |
| Woman                               | 16 366 (83.4%) | 19 626 | 1    |             |       |
| Man                                 | 6 232 (79.6%)  | 7 833  | 0.78 | 0.73        | 0.83  |
| Other/Undisclosed                   | 106 (80.9%)    | 131    | 0.84 | 0.55        | 1.31  |
| <b>Age</b>                          |                |        |      |             |       |
| >60                                 | 9 880 (77.6%)  | 12 737 | 1    |             |       |
| 41-60                               | 8 870 (86.0%)  | 10 314 | 1.78 | 1.66        | 1.90  |
| <41                                 | 3 954 (88.3%)  | 4 479  | 2.18 | 1.97        | 2.41  |
| <b>Education</b>                    |                |        |      |             |       |
| Higher                              | 15 915 (84.1%) | 18 925 | 1    |             |       |
| Lower                               | 6 789 (78.3%)  | 8 665  | 0.68 | 0.64        | 0.73  |
| <b>Relationship</b>                 |                |        |      |             |       |
| Not stable                          | 9 976 (81.9%)  | 12 177 | 1    |             |       |
| Stable                              | 12 728 (82.6%) | 15 413 | 1.05 | 0.98        | 1.11  |
| <b>Healthcare Experience</b>        |                |        |      |             |       |
| No                                  | 13 446 (79.3%) | 16 955 | 1    |             |       |
| Yes                                 | 9 258 (87.1%)  | 10 635 | 1.75 | 1.64        | 1.88  |
| <b>Brain Research Participation</b> |                |        |      |             |       |
| No                                  | 12 796 (81.7%) | 15 671 | 1    |             |       |
| Yes                                 | 9 908 (83.1%)  | 11 919 | 1.11 | 1.04        | 1.18  |
| <b>Cognitive Health</b>             |                |        |      |             |       |
| Average or above                    | 21 407 (82.6%) | 25 929 | 1    |             |       |
| Below average                       | 1 297 (78.1%)  | 1 661  | 0.75 | 0.67        | 0.85  |
| <b>Mental Health</b>                |                |        |      |             |       |
| Average or above                    | 19 708 (82.3%) | 23 958 | 1    |             |       |
| Below average                       | 2 996 (82.5%)  | 3 632  | 1.02 | 0.93        | 1.11  |
| <b>Illness Experience</b>           |                |        |      |             |       |
| No                                  | 13 431 (81.6%) | 16 451 | 1    |             |       |
| Yes                                 | 9 273 (83.2%)  | 11 139 | 1.12 | 1.05        | 1.19  |
| <b>Brain Disease Caregiver</b>      |                |        |      |             |       |
| No                                  | 11 912 (80.7%) | 14 762 | 1    |             |       |
| Yes                                 | 10 792 (84.1%) | 12 828 | 1.27 | 1.19        | 1.35  |

Table 27. Q3 - I associate *cancer* with the brain

| Variable\Subgroup                   | Descriptive   |        | Inferential |          |       |
|-------------------------------------|---------------|--------|-------------|----------|-------|
|                                     | positive      | n      | OR          | CI (95%) |       |
|                                     |               |        |             | lower    | upper |
| <b>Gender</b>                       |               |        |             |          |       |
| Woman                               | 6 623 (33.7%) | 19 626 | 1           |          |       |
| Man                                 | 2 179 (27.8%) | 7 833  | 0.76        | 0.71     | 0.80  |
| Other/Undisclosed                   | 47 (35.9%)    | 131    | 1.10        | 0.77     | 1.57  |
| <b>Age</b>                          |               |        |             |          |       |
| >60                                 | 3 627 (28.5%) | 12 737 | 1           |          |       |
| 41-60                               | 3 513 (34.1%) | 10 314 | 1.30        | 1.23     | 1.37  |
| <41                                 | 1 709 (38.2%) | 4 479  | 1.55        | 1.44     | 1.67  |
| <b>Education</b>                    |               |        |             |          |       |
| Higher                              | 6 457 (34.1%) | 18 925 | 1           |          |       |
| Lower                               | 2 392 (27.6%) | 8 665  | 0.74        | 0.70     | 0.78  |
| <b>Relationship</b>                 |               |        |             |          |       |
| Not stable                          | 3 892 (32.0%) | 12 177 | 1           |          |       |
| Stable                              | 4 957 (32.2%) | 15 413 | 1.01        | 0.96     | 1.06  |
| <b>Healthcare Experience</b>        |               |        |             |          |       |
| No                                  | 4 634 (27.3%) | 16 955 | 1           |          |       |
| Yes                                 | 4 215 (39.6%) | 10 635 | 1.75        | 1.66     | 1.84  |
| <b>Brain Research Participation</b> |               |        |             |          |       |
| No                                  | 4 801 (30.6%) | 15 671 | 1           |          |       |
| Yes                                 | 4 048 (34.0%) | 11 919 | 1.16        | 1.11     | 1.23  |
| <b>Cognitive Health</b>             |               |        |             |          |       |
| Average or above                    | 8 381 (32.3%) | 25 929 | 1           |          |       |
| Below average                       | 468 (28.2%)   | 1 661  | 0.82        | 0.74     | 0.92  |
| <b>Mental Health</b>                |               |        |             |          |       |
| Average or above                    | 7 625 (31.8%) | 23 958 | 1           |          |       |
| Below average                       | 1 224 (33.7%) | 3 632  | 1.09        | 1.01     | 1.17  |
| <b>Illness Experience</b>           |               |        |             |          |       |
| No                                  | 5 099 (31.0%) | 16 451 | 1           |          |       |
| Yes                                 | 3 750 (33.7%) | 11 139 | 1.13        | 1.07     | 1.19  |
| <b>Brain Disease Caregiver</b>      |               |        |             |          |       |
| No                                  | 4 390 (29.7%) | 14 762 | 1           |          |       |
| Yes                                 | 4 459 (34.8%) | 12 828 | 1.26        | 1.20     | 1.32  |



Table 28. Q3 - I associate *hypertension (high blood pressure)* with the brain

| Variable\Subgroup                   | Descriptive   |        | Inferential |                   |       |
|-------------------------------------|---------------|--------|-------------|-------------------|-------|
|                                     | positive      | n      | OR          | CI (95%)<br>lower | upper |
| <b>Gender</b>                       |               |        |             |                   |       |
| Woman                               | 6 610 (33.7%) | 19 626 | 1           |                   |       |
| Man                                 | 2 074 (26.5%) | 7 833  | 0.71        | 0.67              | 0.75  |
| Other/Undisclosed                   | 52 (39.7%)    | 131    | 1.30        | 0.91              | 1.84  |
| <b>Age</b>                          |               |        |             |                   |       |
| >60                                 | 4 353 (34.2%) | 12 737 | 1           |                   |       |
| 41-60                               | 3 247 (31.5%) | 10 314 | 0.89        | 0.84              | 0.94  |
| <41                                 | 1 136 (25.4%) | 4 479  | 0.65        | 0.61              | 0.71  |
| <b>Education</b>                    |               |        |             |                   |       |
| Higher                              | 6 326 (33.4%) | 18 925 | 1           |                   |       |
| Lower                               | 2 410 (27.8%) | 8 665  | 0.77        | 0.73              | 0.81  |
| <b>Relationship</b>                 |               |        |             |                   |       |
| Not stable                          | 3 738 (30.7%) | 12 177 | 1           |                   |       |
| Stable                              | 4 998 (32.4%) | 15 413 | 1.08        | 1.03              | 1.14  |
| <b>Healthcare Experience</b>        |               |        |             |                   |       |
| No                                  | 4 214 (24.9%) | 16 955 | 1           |                   |       |
| Yes                                 | 4 522 (42.5%) | 10 635 | 2.24        | 2.12              | 2.36  |
| <b>Brain Research Participation</b> |               |        |             |                   |       |
| No                                  | 4 662 (29.7%) | 15 671 | 1           |                   |       |
| Yes                                 | 4 074 (34.2%) | 11 919 | 1.23        | 1.17              | 1.29  |
| <b>Cognitive Health</b>             |               |        |             |                   |       |
| Average or above                    | 8 247 (31.8%) | 25 929 | 1           |                   |       |
| Below average                       | 489 (29.4%)   | 1 661  | 0.89        | 0.80              | 1.00  |
| <b>Mental Health</b>                |               |        |             |                   |       |
| Average or above                    | 7 713 (32.2%) | 23 958 | 1           |                   |       |
| Below average                       | 1 023 (28.2%) | 3 632  | 0.83        | 0.76              | 0.89  |
| <b>Illness Experience</b>           |               |        |             |                   |       |
| No                                  | 4 940 (30.0%) | 16 451 | 1           |                   |       |
| Yes                                 | 3 796 (34.1%) | 11 139 | 1.20        | 1.14              | 1.27  |
| <b>Brain Disease Caregiver</b>      |               |        |             |                   |       |
| No                                  | 4 044 (27.4%) | 14 762 | 1           |                   |       |
| Yes                                 | 4 692 (36.6%) | 12 828 | 1.53        | 1.45              | 1.61  |

Table 29. Q3 - I associate *diabetes* with the brain

| Variable\Subgroup                   | Descriptive   |        | OR    | Inferential |       |
|-------------------------------------|---------------|--------|-------|-------------|-------|
|                                     | positive      | n      |       | CI (95%)    |       |
|                                     |               |        |       | lower       | upper |
| <b>Gender</b>                       |               |        |       |             |       |
| Woman                               | 3 265 (16.6%) | 19 626 | 1     |             |       |
| Man                                 | 1 079 (13.8%) | 7 833  | 0.80  | 0.74        | 0.86  |
| Other/Undisclosed                   | 32 (24.4%)    | 131    | 1.62  | 1.09        | 2.42  |
| <b>Age</b>                          |               |        |       |             |       |
| >60                                 | 1 943 (15.3%) | 12 737 | 1     |             |       |
| 41-60                               | 1 775 (17.2%) | 10 314 | 1.155 | 1.076       | 1.239 |
| <41                                 | 658 (14.7%)   | 4 479  | 0.957 | 0.869       | 1.053 |
| <b>Education</b>                    |               |        |       |             |       |
| Higher                              | 3 271 (17.3%) | 18 925 | 1     |             |       |
| Lower                               | 1 105 (12.8%) | 8 665  | 0.70  | 0.65        | 0.75  |
| <b>Relationship</b>                 |               |        |       |             |       |
| Not stable                          | 1 934 (15.9%) | 12 177 | 1     |             |       |
| Stable                              | 2 442 (15.8%) | 15 413 | 1.00  | 0.93        | 1.06  |
| <b>Healthcare Experience</b>        |               |        |       |             |       |
| No                                  | 1 793 (10.6%) | 16 955 | 1     |             |       |
| Yes                                 | 2 583 (24.3%) | 10 635 | 2.71  | 2.54        | 2.90  |
| <b>Brain Research Participation</b> |               |        |       |             |       |
| No                                  | 2 320 (14.8%) | 15 671 | 1     |             |       |
| Yes                                 | 2 056 (17.2%) | 11 919 | 1.20  | 1.12        | 1.28  |
| <b>Cognitive Health</b>             |               |        |       |             |       |
| Average or above                    | 4 117 (15.9%) | 25 929 | 1     |             |       |
| Below average                       | 259 (15.6%)   | 1 661  | 0.98  | 0.85        | 1.12  |
| <b>Mental Health</b>                |               |        |       |             |       |
| Average or above                    | 3 875 (16.2%) | 23 958 | 1     |             |       |
| Below average                       | 501 (13.8%)   | 3 632  | 0.83  | 0.75        | 0.92  |
| <b>Illness Experience</b>           |               |        |       |             |       |
| No                                  | 2 405 (14.6%) | 16 451 | 1     |             |       |
| Yes                                 | 1 971 (17.7%) | 11 139 | 1.26  | 1.18        | 1.34  |
| <b>Brain Disease Caregiver</b>      |               |        |       |             |       |
| No                                  | 1 995 (13.5%) | 14 762 | 1     |             |       |
| Yes                                 | 2 381 (18.6%) | 12 828 | 1.46  | 1.37        | 1.56  |

Table 30. Q3 - I associate *arthritis* with the brain

| Variable\Subgroup positive          | Descriptive  |        | Inferential |          |       |
|-------------------------------------|--------------|--------|-------------|----------|-------|
|                                     |              | n      | OR          | CI (95%) |       |
|                                     |              |        |             | upper    | lower |
| <b>Gender</b>                       |              |        |             |          |       |
| Woman                               | 1 005 (5.1%) | 19 626 | 1           |          |       |
| Man                                 | 305 (3.9%)   | 7 833  | 0.75        | 0.66     | 0.86  |
| Other/Undisclosed                   | 8 (6.1%)     | 131    | 1.21        | 0.59     | 2.47  |
| <b>Age</b>                          |              |        |             |          |       |
| >60                                 | 578 (4.5%)   | 12 737 | 1           |          |       |
| 41-60                               | 535 (5.2%)   | 10 314 | 1.15        | 1.02     | 1.30  |
| <41                                 | 205 (4.6%)   | 4 479  | 1.01        | 0.86     | 1.19  |
| <b>Education</b>                    |              |        |             |          |       |
| Higher                              | 920 (4.9%)   | 18 925 | 1           |          |       |
| Lower                               | 398 (4.6%)   | 8 665  | 0.94        | 0.84     | 1.06  |
| <b>Relationship</b>                 |              |        |             |          |       |
| Not stable                          | 631 (5.2%)   | 12 177 | 1           |          |       |
| Stable                              | 687 (4.5%)   | 15 413 | 0.85        | 0.76     | 0.95  |
| <b>Healthcare Experience</b>        |              |        |             |          |       |
| No                                  | 577 (3.4%)   | 16 955 | 1           |          |       |
| Yes                                 | 741 (7.0%)   | 10 635 | 2.13        | 1.90     | 2.38  |
| <b>Brain Research Participation</b> |              |        |             |          |       |
| No                                  | 737 (4.7%)   | 15 671 | 1           |          |       |
| Yes                                 | 581 (4.9%)   | 11 919 | 1.04        | 0.93     | 1.16  |
| <b>Cognitive Health</b>             |              |        |             |          |       |
| Average or above                    | 1 216 (4.7%) | 25 929 | 1           |          |       |
| Below average                       | 102 (6.1%)   | 1 661  | 1.33        | 1.08     | 1.64  |
| <b>Mental Health</b>                |              |        |             |          |       |
| Average or above                    | 1 151 (4.8%) | 23 958 | 1           |          |       |
| Below average                       | 167 (4.6%)   | 3 632  | 0.96        | 0.81     | 1.13  |
| <b>Illness Experience</b>           |              |        |             |          |       |
| No                                  | 641 (3.9%)   | 16 451 | 1           |          |       |
| Yes                                 | 677 (6.1%)   | 11 139 | 1.60        | 1.43     | 1.78  |
| <b>Brain Disease Caregiver</b>      |              |        |             |          |       |
| No                                  | 622 (4.2%)   | 14 762 | 1           |          |       |
| Yes                                 | 696 (5.4%)   | 12 828 | 1.30        | 1.17     | 1.46  |

# Reporting checklist for cross sectional study.

Based on the STROBE cross sectional guidelines.

## Instructions to authors

Complete this checklist by entering the page numbers from your manuscript where readers will find each of the items listed below.

Your article may not currently address all the items on the checklist. Please modify your text to include the missing information. If you are certain that an item does not apply, please write "n/a" and provide a short explanation.

Upload your completed checklist as an extra file when you submit to a journal.

In your methods section, say that you used the STROBE cross sectional reporting guidelines, and cite them as:

von Elm E, Altman DG, Egger M, Pocock SJ, Gotsche PC, Vandenbroucke JP. The Strengthening the Reporting of Observational Studies in Epidemiology (STROBE) Statement: guidelines for reporting observational studies.

|                           |                                                                                                        | Page   |
|---------------------------|--------------------------------------------------------------------------------------------------------|--------|
|                           | Reporting Item                                                                                         | Number |
| <b>Title and abstract</b> |                                                                                                        |        |
| Title                     | <a href="#">#1a</a> Indicate the study's design with a commonly used term in the title or the abstract | 1      |

|    |                      |                     |                                                                 |     |
|----|----------------------|---------------------|-----------------------------------------------------------------|-----|
| 1  | Abstract             | <a href="#">#1b</a> | Provide in the abstract an informative and balanced summary     | 4   |
| 2  |                      |                     | of what was done and what was found                             |     |
| 3  |                      |                     |                                                                 |     |
| 4  |                      |                     |                                                                 |     |
| 5  |                      |                     |                                                                 |     |
| 6  | <b>Introduction</b>  |                     |                                                                 |     |
| 7  |                      |                     |                                                                 |     |
| 8  |                      |                     |                                                                 |     |
| 9  | Background /         | <a href="#">#2</a>  | Explain the scientific background and rationale for the         | 5-6 |
| 10 | rationale            |                     | investigation being reported                                    |     |
| 11 |                      |                     |                                                                 |     |
| 12 |                      |                     |                                                                 |     |
| 13 |                      |                     |                                                                 |     |
| 14 |                      |                     |                                                                 |     |
| 15 | Objectives           | <a href="#">#3</a>  | State specific objectives, including any prespecified           | 5-6 |
| 16 |                      |                     | hypotheses                                                      |     |
| 17 |                      |                     |                                                                 |     |
| 18 |                      |                     |                                                                 |     |
| 19 |                      |                     |                                                                 |     |
| 20 | <b>Methods</b>       |                     |                                                                 |     |
| 21 |                      |                     |                                                                 |     |
| 22 |                      |                     |                                                                 |     |
| 23 | Study design         | <a href="#">#4</a>  | Present key elements of study design early in the paper         | 6   |
| 24 |                      |                     |                                                                 |     |
| 25 |                      |                     |                                                                 |     |
| 26 | Setting              | <a href="#">#5</a>  | Describe the setting, locations, and relevant dates, including  | 6   |
| 27 |                      |                     | periods of recruitment, exposure, follow-up, and data           |     |
| 28 |                      |                     | collection                                                      |     |
| 29 |                      |                     |                                                                 |     |
| 30 |                      |                     |                                                                 |     |
| 31 |                      |                     |                                                                 |     |
| 32 |                      |                     |                                                                 |     |
| 33 |                      |                     |                                                                 |     |
| 34 | Eligibility criteria | <a href="#">#6a</a> | Give the eligibility criteria, and the sources and methods of   | 6   |
| 35 |                      |                     | selection of participants.                                      |     |
| 36 |                      |                     |                                                                 |     |
| 37 |                      |                     |                                                                 |     |
| 38 |                      |                     |                                                                 |     |
| 39 |                      |                     |                                                                 |     |
| 40 |                      | <a href="#">#7</a>  | Clearly define all outcomes, exposures, predictors, potential   | N/A |
| 41 |                      |                     | confounders, and effect modifiers. Give diagnostic criteria, if |     |
| 42 |                      |                     | applicable                                                      |     |
| 43 |                      |                     |                                                                 |     |
| 44 |                      |                     |                                                                 |     |
| 45 |                      |                     |                                                                 |     |
| 46 |                      |                     |                                                                 |     |
| 47 | Data sources /       | <a href="#">#8</a>  | For each variable of interest give sources of data and details  | 7-8 |
| 48 | measurement          |                     | of methods of assessment (measurement). Describe                |     |
| 49 |                      |                     | comparability of assessment methods if there is more than       |     |
| 50 |                      |                     | one group. Give information separately for for exposed and      |     |
| 51 |                      |                     | unexposed groups if applicable.                                 |     |
| 52 |                      |                     |                                                                 |     |
| 53 |                      |                     |                                                                 |     |
| 54 |                      |                     |                                                                 |     |
| 55 |                      |                     |                                                                 |     |
| 56 |                      |                     |                                                                 |     |
| 57 |                      |                     |                                                                 |     |
| 58 |                      |                     |                                                                 |     |
| 59 |                      |                     |                                                                 |     |
| 60 |                      |                     |                                                                 |     |

|    |                |                      |                                                               |      |
|----|----------------|----------------------|---------------------------------------------------------------|------|
| 1  | Bias           | <a href="#">#9</a>   | Describe any efforts to address potential sources of bias     | N/A  |
| 2  |                |                      |                                                               |      |
| 3  |                |                      |                                                               |      |
| 4  | Study size     | <a href="#">#10</a>  | Explain how the study size was arrived at                     | 7    |
| 5  |                |                      |                                                               |      |
| 6  |                |                      |                                                               |      |
| 7  | Quantitative   | <a href="#">#11</a>  | Explain how quantitative variables were handled in the        | 9-10 |
| 8  | variables      |                      | analyses. If applicable, describe which groupings were        |      |
| 9  |                |                      | chosen, and why                                               |      |
| 10 |                |                      |                                                               |      |
| 11 |                |                      |                                                               |      |
| 12 |                |                      |                                                               |      |
| 13 |                |                      |                                                               |      |
| 14 |                |                      |                                                               |      |
| 15 | Statistical    | <a href="#">#12a</a> | Describe all statistical methods, including those used to     | 9-10 |
| 16 | methods        |                      | control for confounding                                       |      |
| 17 |                |                      |                                                               |      |
| 18 |                |                      |                                                               |      |
| 19 |                |                      |                                                               |      |
| 20 | Statistical    | <a href="#">#12b</a> | Describe any methods used to examine subgroups and            | 9-10 |
| 21 | methods        |                      | interactions                                                  |      |
| 22 |                |                      |                                                               |      |
| 23 |                |                      |                                                               |      |
| 24 |                |                      |                                                               |      |
| 25 |                |                      |                                                               |      |
| 26 | Statistical    | <a href="#">#12c</a> | Explain how missing data were addressed                       | N/A  |
| 27 | methods        |                      |                                                               |      |
| 28 |                |                      |                                                               |      |
| 29 |                |                      |                                                               |      |
| 30 |                |                      |                                                               |      |
| 31 | Statistical    | <a href="#">#12d</a> | If applicable, describe analytical methods taking account of  | N/A  |
| 32 | methods        |                      | sampling strategy                                             |      |
| 33 |                |                      |                                                               |      |
| 34 |                |                      |                                                               |      |
| 35 |                |                      |                                                               |      |
| 36 | Statistical    | <a href="#">#12e</a> | Describe any sensitivity analyses                             | N/A  |
| 37 | methods        |                      |                                                               |      |
| 38 |                |                      |                                                               |      |
| 39 |                |                      |                                                               |      |
| 40 |                |                      |                                                               |      |
| 41 |                |                      |                                                               |      |
| 42 | <b>Results</b> |                      |                                                               |      |
| 43 |                |                      |                                                               |      |
| 44 |                |                      |                                                               |      |
| 45 | Participants   | <a href="#">#13a</a> | Report numbers of individuals at each stage of study—eg       | 10   |
| 46 |                |                      | numbers potentially eligible, examined for eligibility,       |      |
| 47 |                |                      | confirmed eligible, included in the study, completing follow- |      |
| 48 |                |                      | up, and analysed. Give information separately for for         |      |
| 49 |                |                      | exposed and unexposed groups if applicable.                   |      |
| 50 |                |                      |                                                               |      |
| 51 |                |                      |                                                               |      |
| 52 |                |                      |                                                               |      |
| 53 |                |                      |                                                               |      |
| 54 |                |                      |                                                               |      |
| 55 |                |                      |                                                               |      |
| 56 |                |                      |                                                               |      |
| 57 | Participants   | <a href="#">#13b</a> | Give reasons for non-participation at each stage              | N/A  |
| 58 |                |                      |                                                               |      |
| 59 |                |                      |                                                               |      |
| 60 |                |                      |                                                               |      |

|    |                   |                      |                                                                   |       |
|----|-------------------|----------------------|-------------------------------------------------------------------|-------|
| 1  | Participants      | <a href="#">#13c</a> | Consider use of a flow diagram                                    | N/A   |
| 2  |                   |                      |                                                                   |       |
| 3  |                   |                      |                                                                   |       |
| 4  | Descriptive data  | <a href="#">#14a</a> | Give characteristics of study participants (eg demographic,       | 12    |
| 5  |                   |                      | clinical, social) and information on exposures and potential      |       |
| 6  |                   |                      | confounders. Give information separately for exposed and          |       |
| 7  |                   |                      | unexposed groups if applicable.                                   |       |
| 8  |                   |                      |                                                                   |       |
| 9  |                   |                      |                                                                   |       |
| 10 |                   |                      |                                                                   |       |
| 11 |                   |                      |                                                                   |       |
| 12 |                   |                      |                                                                   |       |
| 13 |                   |                      |                                                                   |       |
| 14 | Descriptive data  | <a href="#">#14b</a> | Indicate number of participants with missing data for each        | N/A   |
| 15 |                   |                      | variable of interest                                              |       |
| 16 |                   |                      |                                                                   |       |
| 17 |                   |                      |                                                                   |       |
| 18 |                   |                      |                                                                   |       |
| 19 | Outcome data      | <a href="#">#15</a>  | Report numbers of outcome events or summary measures.             | 13-21 |
| 20 |                   |                      | Give information separately for exposed and unexposed             |       |
| 21 |                   |                      | groups if applicable.                                             |       |
| 22 |                   |                      |                                                                   |       |
| 23 |                   |                      |                                                                   |       |
| 24 |                   |                      |                                                                   |       |
| 25 |                   |                      |                                                                   |       |
| 26 |                   |                      |                                                                   |       |
| 27 | Main results      | <a href="#">#16a</a> | Give unadjusted estimates and, if applicable, confounder-         | 13-21 |
| 28 |                   |                      | adjusted estimates and their precision (eg, 95% confidence        |       |
| 29 |                   |                      | interval). Make clear which confounders were adjusted for         |       |
| 30 |                   |                      | and why they were included                                        |       |
| 31 |                   |                      |                                                                   |       |
| 32 |                   |                      |                                                                   |       |
| 33 |                   |                      |                                                                   |       |
| 34 |                   |                      |                                                                   |       |
| 35 |                   |                      |                                                                   |       |
| 36 |                   |                      |                                                                   |       |
| 37 | Main results      | <a href="#">#16b</a> | Report category boundaries when continuous variables were         | 9-10  |
| 38 |                   |                      | categorized                                                       |       |
| 39 |                   |                      |                                                                   |       |
| 40 |                   |                      |                                                                   |       |
| 41 |                   |                      |                                                                   |       |
| 42 | Main results      | <a href="#">#16c</a> | If relevant, consider translating estimates of relative risk into | N/A   |
| 43 |                   |                      | absolute risk for a meaningful time period                        |       |
| 44 |                   |                      |                                                                   |       |
| 45 |                   |                      |                                                                   |       |
| 46 |                   |                      |                                                                   |       |
| 47 |                   |                      |                                                                   |       |
| 48 | Other analyses    | <a href="#">#17</a>  | Report other analyses done—e.g., analyses of subgroups            | N/A   |
| 49 |                   |                      | and interactions, and sensitivity analyses                        |       |
| 50 |                   |                      |                                                                   |       |
| 51 |                   |                      |                                                                   |       |
| 52 |                   |                      |                                                                   |       |
| 53 | <b>Discussion</b> |                      |                                                                   |       |
| 54 |                   |                      |                                                                   |       |
| 55 |                   |                      |                                                                   |       |
| 56 | Key results       | <a href="#">#18</a>  | Summarise key results with reference to study objectives          | 22-24 |
| 57 |                   |                      |                                                                   |       |
| 58 |                   |                      |                                                                   |       |
| 59 |                   |                      |                                                                   |       |
| 60 |                   |                      |                                                                   |       |

|    |                          |                     |                                                                |       |
|----|--------------------------|---------------------|----------------------------------------------------------------|-------|
| 1  | Limitations              | <a href="#">#19</a> | Discuss limitations of the study, taking into account sources  | 24-25 |
| 2  |                          |                     | of potential bias or imprecision. Discuss both direction and   |       |
| 3  |                          |                     | magnitude of any potential bias.                               |       |
| 4  |                          |                     |                                                                |       |
| 5  |                          |                     |                                                                |       |
| 6  |                          |                     |                                                                |       |
| 7  |                          |                     |                                                                |       |
| 8  |                          |                     |                                                                |       |
| 9  | Interpretation           | <a href="#">#20</a> | Give a cautious overall interpretation considering objectives, | 22-24 |
| 10 |                          |                     | limitations, multiplicity of analyses, results from similar    |       |
| 11 |                          |                     | studies, and other relevant evidence.                          |       |
| 12 |                          |                     |                                                                |       |
| 13 |                          |                     |                                                                |       |
| 14 |                          |                     |                                                                |       |
| 15 |                          |                     |                                                                |       |
| 16 | Generalisability         | <a href="#">#21</a> | Discuss the generalisability (external validity) of the study  | 25-26 |
| 17 |                          |                     | results.                                                       |       |
| 18 |                          |                     |                                                                |       |
| 19 |                          |                     |                                                                |       |
| 20 |                          |                     |                                                                |       |
| 21 |                          |                     |                                                                |       |
| 22 | <b>Other Information</b> |                     |                                                                |       |
| 23 |                          |                     |                                                                |       |
| 24 |                          |                     |                                                                |       |
| 25 | Funding                  | <a href="#">#22</a> | Give the source of funding and the role of the funders for the | 27    |
| 26 |                          |                     | present study and, if applicable, for the original study on    |       |
| 27 |                          |                     | which the present article is based                             |       |
| 28 |                          |                     |                                                                |       |
| 29 |                          |                     |                                                                |       |
| 30 |                          |                     |                                                                |       |
| 31 |                          |                     |                                                                |       |
| 32 |                          |                     |                                                                |       |

33 None The STROBE checklist is distributed under the terms of the Creative Commons Attribution  
34 License CC-BY. This checklist can be completed online using <https://www.goodreports.org/>, a tool  
35 made by the [EQUATOR Network](#) in collaboration with [Penelope.ai](#)  
36  
37  
38  
39  
40  
41  
42  
43  
44  
45  
46  
47  
48  
49  
50  
51  
52  
53  
54  
55  
56  
57  
58  
59  
60



# BMJ Open

## Public perceptions of brain health: an international, online cross-sectional survey

|                                 |                                                                                                                                                                                                                                                                                                                                                                                                                                                                                                                                                                                                                                                                                                                                                                                                                                                                                                                                                                                                                                                                                                                                                                                                                                                                                                                                                                                                                                            |
|---------------------------------|--------------------------------------------------------------------------------------------------------------------------------------------------------------------------------------------------------------------------------------------------------------------------------------------------------------------------------------------------------------------------------------------------------------------------------------------------------------------------------------------------------------------------------------------------------------------------------------------------------------------------------------------------------------------------------------------------------------------------------------------------------------------------------------------------------------------------------------------------------------------------------------------------------------------------------------------------------------------------------------------------------------------------------------------------------------------------------------------------------------------------------------------------------------------------------------------------------------------------------------------------------------------------------------------------------------------------------------------------------------------------------------------------------------------------------------------|
| Journal:                        | <i>BMJ Open</i>                                                                                                                                                                                                                                                                                                                                                                                                                                                                                                                                                                                                                                                                                                                                                                                                                                                                                                                                                                                                                                                                                                                                                                                                                                                                                                                                                                                                                            |
| Manuscript ID                   | bmjopen-2021-057999.R1                                                                                                                                                                                                                                                                                                                                                                                                                                                                                                                                                                                                                                                                                                                                                                                                                                                                                                                                                                                                                                                                                                                                                                                                                                                                                                                                                                                                                     |
| Article Type:                   | Original research                                                                                                                                                                                                                                                                                                                                                                                                                                                                                                                                                                                                                                                                                                                                                                                                                                                                                                                                                                                                                                                                                                                                                                                                                                                                                                                                                                                                                          |
| Date Submitted by the Author:   | 24-Jan-2022                                                                                                                                                                                                                                                                                                                                                                                                                                                                                                                                                                                                                                                                                                                                                                                                                                                                                                                                                                                                                                                                                                                                                                                                                                                                                                                                                                                                                                |
| Complete List of Authors:       | Budin Ljøsne , Isabelle; Norwegian Institute of Public Health, Mowinckel , Athanasia Monika ; University of Oslo<br>Friedman, Barbara ; University of Oslo<br>Ebmeier , Klaus; University of Oxford<br>Drevon, Christian; University of Oslo, Department of Nutrition, Institute of Basic Medical Sciences, Faculty of Medicine<br>Carver, Rebecca; Norwegian Institute of Public Health<br>Zsoldos, Enikő; University of Oxford<br>Fredheim, Nanna; Norwegian Institute of Public Health<br>Sørensen, Øystein; University of Oslo<br>Baaré , William Frans Christiaan ; Copenhagen University Hospital<br>Madsen , Kathrine ; Copenhagen University Hospital<br>Fjell, Anders; University of Oslo, Department of Psychology, , Center for Lifespan Changes in Brain and Cognition<br>Kievit, Rogier ; Radboud University Medical Center for Infectious Diseases<br>Ghisletta, Paolo; University of Geneva<br>Bartrés-Faz, David ; University of Barcelona<br>Nawijn, Laura ; Vrije Universiteit Amsterdam<br>Solé-Padullés , Cristina ; University of Barcelona<br>Walhovd, Kristine; University of Oslo, Department of Psychology, , Center for Lifespan Changes in Brain and Cognition<br>Düzel, Sandra; Max-Planck-Institute for Human Development<br>Zasyekina, Larisa; Volyn National University of Lesya Ukrainka<br>Iulita , Maria Florencia ; Universitat Autònoma de Barcelona<br>Ferretti, Maria Teresa ; Women's Brain Project |
| <b>Primary Subject Heading</b>: | Public health                                                                                                                                                                                                                                                                                                                                                                                                                                                                                                                                                                                                                                                                                                                                                                                                                                                                                                                                                                                                                                                                                                                                                                                                                                                                                                                                                                                                                              |
| Secondary Subject Heading:      | Mental health, Neurology, Public health                                                                                                                                                                                                                                                                                                                                                                                                                                                                                                                                                                                                                                                                                                                                                                                                                                                                                                                                                                                                                                                                                                                                                                                                                                                                                                                                                                                                    |
| Keywords:                       | Health policy < HEALTH SERVICES ADMINISTRATION & MANAGEMENT, MENTAL HEALTH, Dementia < NEUROLOGY, PREVENTIVE MEDICINE, PUBLIC HEALTH                                                                                                                                                                                                                                                                                                                                                                                                                                                                                                                                                                                                                                                                                                                                                                                                                                                                                                                                                                                                                                                                                                                                                                                                                                                                                                       |
|                                 |                                                                                                                                                                                                                                                                                                                                                                                                                                                                                                                                                                                                                                                                                                                                                                                                                                                                                                                                                                                                                                                                                                                                                                                                                                                                                                                                                                                                                                            |

1  
2  
3  
4  
5  
6  
7  
8  
9  
10  
11  
12  
13  
14  
15  
16  
17  
18  
19  
20  
21  
22  
23  
24  
25  
26  
27  
28  
29  
30  
31  
32  
33  
34  
35  
36  
37  
38  
39  
40  
41  
42  
43  
44  
45  
46  
47  
48  
49  
50  
51  
52  
53  
54  
55  
56  
57  
58  
59  
60

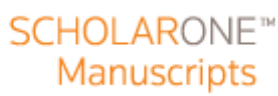

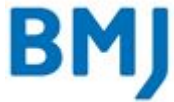

I, the Submitting Author has the right to grant and does grant on behalf of all authors of the Work (as defined in the below author licence), an exclusive licence and/or a non-exclusive licence for contributions from authors who are: i) UK Crown employees; ii) where BMJ has agreed a CC-BY licence shall apply, and/or iii) in accordance with the terms applicable for US Federal Government officers or employees acting as part of their official duties; on a worldwide, perpetual, irrevocable, royalty-free basis to BMJ Publishing Group Ltd ("BMJ") its licensees and where the relevant Journal is co-owned by BMJ to the co-owners of the Journal, to publish the Work in this journal and any other BMJ products and to exploit all rights, as set out in our [licence](#).

The Submitting Author accepts and understands that any supply made under these terms is made by BMJ to the Submitting Author unless you are acting as an employee on behalf of your employer or a postgraduate student of an affiliated institution which is paying any applicable article publishing charge ("APC") for Open Access articles. Where the Submitting Author wishes to make the Work available on an Open Access basis (and intends to pay the relevant APC), the terms of reuse of such Open Access shall be governed by a Creative Commons licence – details of these licences and which [Creative Commons](#) licence will apply to this Work are set out in our licence referred to above.

Other than as permitted in any relevant BMJ Author's Self Archiving Policies, I confirm this Work has not been accepted for publication elsewhere, is not being considered for publication elsewhere and does not duplicate material already published. I confirm all authors consent to publication of this Work and authorise the granting of this licence.

## Public perceptions of brain health: an international, online cross-sectional survey

Isabelle Budin-Ljøsne (0000-0002-4610-1662)<sup>1\*</sup>, Athanasia Monika Mowinckel (0000-0002-5756-0223)<sup>2</sup>, Barbara Bodorkos Friedman<sup>3</sup>, Klaus P Ebmeier (0000-0002-5190-7038)<sup>4</sup>, Christian A Drevon (0000-0002-7216-2784)<sup>5</sup>, Rebecca Bruu Carver (0000-0003-4490-0441)<sup>6</sup>, Enikő Zsoldos (0000-0002-0478-6165)<sup>7</sup>, Nanna Alida Grit Fredheim (0000-0001-6110-125X)<sup>8</sup>, Øystein Sørensen (0000-0003-0724-3542)<sup>9</sup>, William Frans Christiaan Baaré (0000-0002-1810-7266)<sup>10</sup>, Kathrine Skak Madsen (0000-0001-8884-5902)<sup>11</sup>, Anders M Fjell (0000-0003-2502-8774)<sup>12</sup>, Rogier A Kievit<sup>13</sup> (0000-0003-0700-4568), Paolo Ghisletta<sup>14</sup> (0000-0001-7731-2406), David Bartrés-Faz<sup>15</sup> (0000-0001-6020-4118), Laura Nawijn<sup>16</sup> (0000-0001-7183-8933), Cristina Solé-Padullés (0000-0002-6653-1053)<sup>17</sup>, Kristine B Walhovd (0000-0003-1918-1123)<sup>18</sup>, Sandra Düzel<sup>19</sup>, Larisa Zasyekina (0000-0001-8456-077)<sup>20</sup>, Maria Florencia Iulita (0000-0002-3360-4498)<sup>21</sup> and Maria Teresa Ferretti<sup>22</sup>

<sup>1</sup> Department of Genetics and Bioinformatics, Norwegian Institute of Public Health, Norway, Senior Adviser, Isabelle.budin.ljosne@fhi.no

<sup>2</sup> Center for Lifespan Changes in Brain and Cognition, Department of Psychology, University of Oslo, Norway, Researcher, a.m.mowinckel@psykologi.uio.no

<sup>3</sup> Center for Lifespan Changes in Brain and Cognition, Department of Psychology, University of Oslo, Norway, Research coordinator, b.b.friedman@psykologi.uio.no

<sup>4</sup> Department of Psychiatry (UOXF), Warneford Hospital, University of Oxford, OX37JX Oxford, UK. Chair of Old Age Psychiatry, klaus.ebmeier@psych.ox.ac.uk

<sup>5</sup> Vitas AS, Research Park, Gaustadalleen 21, 0349, Oslo, consultant; Department of Nutrition, Institute of Basic Medical Sciences, Faculty of Medicine, University of Oslo, Norway, Professor Emeritus, c.a.drevon@medisin.uio.no

<sup>6</sup> Department of Communication, Norwegian Institute of Public Health, Norway, senior Communication Officer, Rebecca.Bruu.Carver@fhi.no

1  
2 <sup>7</sup> Department of Psychiatry and Wellcome Centre for Integrative Neuroimaging (WIN), University of  
3  
4 Oxford, Oxford, OX3 7JX, United Kingdom, Postdoctoral Researcher, eniko.zsoldos@psych.ox.ac.uk  
5

6  
7 <sup>8</sup> Department of Genetics and Bioinformatics, Norwegian Institute of Public Health, Norway,  
8  
9 Researcher, NannaAlidaGrit.Fredheim@fhi.no  
10

11  
12 <sup>9</sup> Center for Lifespan Changes in Brain and Cognition, Department of Psychology, University of Oslo,  
13  
14 Norway, Associate Professor, oystein.sorensen@psykologi.uio.no  
15

16  
17 <sup>10</sup> Danish Research Centre for Magnetic Resonance, Centre for Functional and Diagnostic Imaging and  
18  
19 Research, Copenhagen University Hospital - Amager and Hvidovre, Copenhagen, Denmark, Senior  
20  
21 Researcher, wimb@drcmr.dk  
22

23  
24 <sup>11</sup> Danish Research Centre for Magnetic Resonance, Centre for Functional and Diagnostic Imaging and  
25  
26 Research, Copenhagen University Hospital - Amager and Hvidovre, Copenhagen, Denmark, Senior  
27  
28 Researcher, kathrine@drcmr.dk  
29

30  
31 <sup>12</sup> Center for Lifespan Changes in Brain and Cognition, Department of Psychology, University of Oslo,  
32  
33 Norway, Professor, a.m.fjell@psykologi.uio.no  
34

35  
36 <sup>13</sup> Cognitive Neuroscience Department, Donders Institute for Brain, Cognition and Behavior, Radboud  
37  
38 University Medical Center, Nijmegen, The Netherlands, Professor, roger.kievit@donders.ru.nl  
39

40  
41 <sup>14</sup> Faculty of Psychology and Educational Sciences, University of Geneva, Switzerland (full professor);  
42  
43 UniDistance Suisse, Brig, Switzerland (dean); Swiss National Centre of Competence in Research LIVES,  
44  
45 University of Geneva, Switzerland, Full professor, paolo.ghisletta@unige.ch  
46  
47

48  
49 <sup>15</sup> Department of Medicine, Faculty of Medicine and Health Sciences and Institute of Neuroscience,  
50  
51 University of Barcelona, Institut d'Investigacions Biomèdiques August Pi i Sunyer (IDIBAPS),  
52  
53 Barcelona, Spain, Professor, dbartres@ub.edu  
54

55  
56 <sup>16</sup> Amsterdam UMC, Location VUmc, Vrije Universiteit Amsterdam, Department of Psychiatry,  
57  
58 Amsterdam Neuroscience, Amsterdam, The Netherlands, Postdoctoral Researcher,  
59  
60 l.nawijn@amsterdamumc.nl

1  
2 <sup>17</sup> Department of Medicine, Faculty of Medicine and Health Sciences and Institute of Neuroscience,  
3  
4 University of Barcelona, Institut d'Investigacions Biomèdiques August Pi i Sunyer (IDIBAPS),  
5  
6 Barcelona, Spain; csolepadulles@ub.edu  
7

8  
9 <sup>18</sup> Center for Lifespan Changes in Brain and Cognition, Department of Psychology, University of Oslo,  
10  
11 Norway, Professor, k.b.walhovd@psykologi.uio.no  
12

13  
14 <sup>19</sup> Center for Lifespan Psychology, Max Planck Institute for Human Development, Berlin, Germany,  
15  
16 Senior Research Scientist, duezel@mpib-berlin.mpg.de  
17

18  
19 <sup>20</sup> Department of General and Clinical Psychology, Professor, Vice-Rector for Research and  
20  
21 International Affairs, Lesya Ukrainka Volyn National University, larisa.zasyekina@vnu.edu.ua  
22

23  
24 <sup>21</sup> Sant Pau Memory Unit, Department of Neurology, Hospital de la Santa Creu i Sant Pau, Biomedical  
25  
26 Research Institute Sant Pau, Universitat Autònoma de Barcelona, Barcelona, Spain, Senior Scientist,  
27  
28 miulita@santpau.cat  
29

30  
31 <sup>22</sup> Women's Brain Project, c/o Pfisterwisstrasse 14, 8357 Guntershausen, Switzerland, Chief Scientific  
32  
33 Officer, mariateresa.ferretti@gmail.com  
34  
35

36  
37  
38  
39  
40 **\* Correspondence:**

41  
42  
43 Dr. Isabelle Budin-Ljøsne. Email: Isabelle.budin.ljosne@fhi.no  
44

45  
46 Norwegian Institute of Public Health  
47

48  
49 P.O.Box 222 Skøyen  
50

51  
52 NO-0213 Oslo, Norway  
53

54  
55  
56  
57 **Keywords:** Survey, brain health, perceptions, attitudes, lifestyle, cognitive health, mental health,  
58  
59 policy  
60

## ABSTRACT

**Objectives:** To investigate public perspectives on brain health.

**Design:** Cross-sectional multi-language online survey.

**Setting:** Lifebrain posted the survey on its website and social media and shared it with stakeholders.

The survey was open from June 4, 2019 until August 31, 2020.

**Participants:** N=27,590 aged  $\geq 18$  years completed the survey. The respondents were predominantly women (71%), middle-aged (41-60 years; 37%) or above (>60 years; 46%), highly educated (69%) and resided in Europe (98%).

**Main outcome measures:** Survey respondents' views were assessed regarding factors that may influence brain health, life periods considered important to look after the brain, and diseases and disorders associated with the brain. We run exploratory linear models at a 99% level of significance to assess correlates of the outcome variables, adjusting for likely confounders in a targeted fashion.

**Results:** The survey respondents recognized the impact of lifestyle factors on brain health but had relatively less awareness of the role that socio-economic factors might play. Most respondents rated all life periods as important for the brain (95-96%), although the prenatal period was ranked lower (84%). Women and highly educated respondents more often rated factors and life periods to be important for brain health. Ninety-nine percent of respondents associated Alzheimer's disease and dementia with the brain. The respondents made a clear connection between mental health and the brain, and mental disorders such as schizophrenia and depression were more often considered to be associated with the brain than neurological disorders such as stroke and Parkinson's disease. Few respondents (<32%) associated cancer, hypertension, diabetes, and arthritis with the brain.

**Conclusions:** Differences in perceptions of brain health were noted among specific segments of the population. Policies providing information about health behaviors beneficial for the brain and targeting people less likely to have relevant experience seem to be needed.

**ARTICLE SUMMARY****STRENGTHS AND LIMITATIONS OF THIS STUDY**

- We aimed to investigate the views of an international sample of people regarding factors that may influence brain health, life periods considered important to look after the brain, and diseases and disorders potentially associated with the brain.

- The survey was developed in collaboration with representatives from national brain councils, brain foundations, and research registries interested in brain health and was made available online in 14 languages.

- The survey respondents were mostly middle-aged or older, highly educated women probably interested in brain health; thus, our respondents are not representative of the general population.

- We attempted to adjust for measured confounders using multivariable analyses. The knowledge gaps observed in this sample are likely to be an issue also in a more representative sample.



## INTRODUCTION

Many neurological and mental conditions affect the brain's structure and function like dementia, stroke, depression, and schizophrenia, and significantly contribute to the global burden of non-communicable diseases<sup>1</sup>. The U.S. National Institute on Aging recently described brain health as the ability to *"remember, learn, plan, concentrate, and handle challenges [...] and be mentally and emotionally in balance, [...] making the most of the brain and taking care of it."*<sup>2</sup> There is increasing evidence that adopting healthy lifestyles including physical activity, having a healthy diet and good cardiovascular control, restraining from substance use, avoiding chronic stress, and perhaps getting enough sleep, may reduce risk of developing some brain diseases, although such impacts are not conclusively understood<sup>3,4</sup>.

Knowledge regarding how people perceive brain health, and what actions they are willing to take to maintain a healthy brain, is needed. In Europe, surveys aiming to investigate public perceptions of cognitive health have been conducted in Ireland<sup>5,6</sup>, the Netherlands<sup>7</sup>, and the United Kingdom<sup>8</sup>, and suggest limited knowledge and awareness of dementia, dementia risk, and factors contributing to cognitive decline. Studies conducted in France<sup>9</sup> and the United Kingdom<sup>10</sup> reported a lack of understanding of some mental disorders such as schizophrenia, bipolar disorders, and autism. In Slovenia, a recent survey reported that, despite awareness of the importance of brain health, lay people were unlikely to adopt purposefully behaviors beneficial for the brain due to lack of time and information<sup>11</sup>. Qualitative studies conducted in the United Kingdom<sup>12,13</sup> and elsewhere in Europe<sup>14</sup>, showed varying awareness of actions beneficial for the brain, and emphasized the importance of providing people with evidence-based and trustworthy information to encourage adoption of brain-friendly behaviors. Studies conducted in Australia and New Zealand have also reported limited knowledge about cognitive health and Alzheimer's disease<sup>15</sup> and potential measures to reduce risk of dementia and cognitive decline<sup>16-19</sup>. A 2015 systematic review of public perceptions about risk and protective factors for cognitive health and impairment concluded that although some awareness was

1  
2 present regarding risk factors for cognitive impairment, efforts should be made to provide the general  
3  
4 public with accurate information regarding risk reducing strategies<sup>20</sup>.  
5

6  
7 These studies offer useful insights to understand public perceptions of brain health but usually were  
8  
9 conducted at national level and included samples of limited size. They often focused on one specific  
10  
11 aspect of brain health, such as cognitive health or a mental illness, used different measures and  
12  
13 instruments, and did not share a common definition of brain health, making a comparison of results  
14  
15 between studies challenging. Investigating perceptions of brain health in a larger sample and exploring  
16  
17 how views may differ depending on gender, age, and education, will provide new and useful  
18  
19 knowledge to guide brain health promotion. If there is a mismatch between what people consider  
20  
21 important and what the best available evidence suggests, there may be considerable public health  
22  
23 gains to explain the benefits or dangers of certain factors, especially those that could be acted on by  
24  
25 the individual.  
26  
27  
28

29  
30 In June 2019, the Lifebrain consortium<sup>21</sup> launched the “Global Brain Health Survey.”<sup>22</sup> Lifebrain is a  
31  
32 European consortium including 16 partners and data from brain imaging cohorts in eight European  
33  
34 countries, totaling approximately 6,000 research participants<sup>23</sup>. We aimed to investigate the  
35  
36 perspectives of participants in the Lifebrain cohorts and members of the public on brain health. The  
37  
38 survey was conducted online and featured as “global” to invite anyone interested in the topic of brain  
39  
40 health to take the survey irrespective of geographical location. The survey included four overall  
41  
42 themes: perception of some aspects of brain health, interest in undertaking brain health tests,  
43  
44 motivations to look after one’s brain, and support needed to make lifestyle changes beneficial for the  
45  
46 brain. In this paper, we report responses to survey questions relating to: (1) factors believed to  
47  
48 influence brain health, (2) specific life periods considered important to look after one’s brain, and (3)  
49  
50 diseases and disorders associated with the brain. Whereas extrapolating from responses in this  
51  
52 convenience sample to the general population will not be feasible considering the diverse recruitment  
53  
54 rates and sample characteristics in different countries, we adjust results for obvious confounding  
55  
56 variables, such as age, sex, and education where appropriate.  
57  
58  
59  
60

## METHODS

A detailed description of the survey's background and design, technical platform as well as a summary of the main questionnaire has been published elsewhere<sup>22</sup>. In brief, the survey included 16 multiple-choice questions addressing brain health perceptions and 12 questions on demographics. The questions were developed using an interview guide from a previous qualitative interview study, where we investigated Lifebrain research participants' perceptions of brain health<sup>24</sup>. The survey was translated to 14 languages, including English, Danish, Spanish, French, Norwegian, Catalan, German, Swedish, Hungarian, Ukrainian, Italian, Dutch, Chinese (simplified mandarin), and Turkish. The study applied the procedure of back translation. The survey was made freely available online from the Lifebrain website: [www.lifebrain.uio.no](http://www.lifebrain.uio.no), was anonymous and took approximately 15-20 minutes to complete. No financial compensation was provided to respondents. On the introductory survey page, the U.S. National Institute on Aging's description of brain health was provided<sup>2</sup>. The survey was available from June 2019 and was closed 31 August 2020. To be able to submit their questionnaire, the respondents had to consent to the use of their data for research and complete at least five multiple-choice questions and the 12 demographic questions.

### Patient and public involvement (PPI)

The draft survey questionnaire was shared and discussed with representatives from patient organizations and national brain councils<sup>25</sup> in Europe, Lifebrain researchers and cohort participants, and members of the public who participated in Lifebrain stakeholder workshops and public lectures in Spain, Norway, and the United Kingdom. Their suggestions for improvement were integrated in later versions of the questionnaire. The questionnaire was also shared with national brain councils in Norway, Belgium, and Germany, and brain foundations, and some agreed to become official co-organizers of the survey.

## Sampling

The survey was primarily distributed via the Lifebrain cohorts' websites, social media, and E-newsletters, and with help from approximately 20 to 25 European organizational stakeholders in the consortium network. National brain councils, brain foundations, universities, research projects, professional societies, patient organizations and charities, and research registries, whose mission is to match interested volunteers with research groups, invited their members to take the survey. In addition, Lifebrain researchers posted the survey on their websites and social media, and distributed leaflets presenting the survey at conferences, scientific events, in public libraries, and hospital waiting rooms. The survey was also featured in Scandinavian media<sup>26 27</sup>. As the survey was freely available online, it is likely that it has been shared by other stakeholders outside of Europe.

## Measures

We used three of the 16 multiple-choice questions in the survey questionnaire providing information about perceptions of brain health, and 12 demographic questions. The three multiple-choice questions were not mandatory and could be skipped by the respondents, whereas the 12 demographic questions were mandatory. For each multiple-choice question, respondents could endorse any number of items.

### *Factors influencing brain health*

The first question was: "In your opinion, to what extent do the following influence brain health?." A list of 11 factors was provided including physical health, diet, physical environment (e.g., air pollution, noise), social environment (e.g., family, social network), education, profession, family income, genetics and family medical history, substance use (e.g., alcohol, smoking and drugs), sleeping habits and having goals that make life meaningful. The respondents could rate the factors using a 5-item Likert scale (very strong, strong, moderate, weak, or no influence).

### *Specific life periods to look after one's brain*

1  
2 The second question was: "In your opinion, at what stages in life is it important to look after one's  
3 brain?" Respondents could rate six life periods: in the womb (before birth), childhood (from birth to  
4 12 years), adolescence (13-18 years), young adulthood (19-45 years), middle age (46-65 years) and old  
5 12 years), adolescence (13-18 years), young adulthood (19-45 years), middle age (46-65 years) and old  
6 age (over 65 years), using a 4-item Likert scale (very important, important, moderately important, not  
7 important).  
8  
9  
10  
11  
12

### 13 *Diseases and disorders associated with the brain*

14  
15  
16 The third question was: "Which of the following diseases/disorders do you associate with the brain?."  
17 A list of 13 disorders was provided, of which 10 are recognized brain disorders (i.e., Alzheimer's disease  
18 and other forms of dementia, bipolar disorder, schizophrenia, Parkinson's disease, addiction, stroke,  
19 depression, migraine, anxiety, cancer), and 3 are known to have an impact on the brain (i.e., diabetes,  
20 arthritis, and hypertension). When listing cancer, we did not specify whether it referred to brain cancer  
21 or other types of cancer.  
22  
23  
24  
25  
26  
27  
28  
29

### 30 *Demographic questions*

31  
32  
33 The respondents were asked about their age category (18-25, 26-40, 41-60, 61-70, 71-80, over 80),  
34 gender (male, female, other, prefer not to tell), highest attained educational qualification (primary  
35 school, special educational school, secondary school, vocational training, university/college degree),  
36 relationship/civil status (single, in a stable relationship but not married, married, divorced or  
37 separated, or widowed), and occupational status (employed for wages or self-employed, unemployed,  
38 homemaker, student, retired, unable to work, or doing unpaid or voluntary work). The respondents  
39 were also asked to rate their ability to think, remember and learn (hereafter referred to as self-  
40 reported *cognitive health*) as well as their ability to be mentally and emotionally in balance (hereafter  
41 referred to as self-reported *mental health*) using a 5-item Likert scale (excellent, above average,  
42 average, below average, very poor). Finally, we asked for information about country of residence,  
43 previous experience of participating in brain research (yes, no), educational or work experience in  
44 health care (yes, no), experience of long-standing illness, disability, or health problem (yes, no), and  
45 experience of looking after a family member with brain disease (yes, no).  
46  
47  
48  
49  
50  
51  
52  
53  
54  
55  
56  
57  
58  
59  
60

## Statistical analysis

Exploratory linear models were performed on all survey questions presented applying R version 4.1.0<sup>28</sup>. Ten models were used per response category, exploring the relationship between demographic characteristics and responses. We report binarized responses and odds ratios for the purposes of communication and simplicity. However, we are aware of the potential pitfalls<sup>29</sup> so for purposes of robustness, we also report data modelled as continuous in the supplementary materials, and note general agreement between the binary and continuous models (see **supplementary material 1**). Complete detailed descriptive statistics are provided for all questions in **supplementary material 2** and the continuous, binary, and ordinal models for question 1 and question 2 are provided in **supplementary material 3**. Only responses from submitted questionnaires were used in the analysis.

The very large sample size with high statistical power made it very likely that group differences apparent on inspection of numbers were statistically significant. This means that many statistically significant results may not be of practical importance. Thus, rather than using methods of controlling for multiple comparisons, we report results only significant at the 1% level of probability and make a distinction between practically unimportant and probably important effects. If there was an obvious risk of confounding by the descriptive variables age, sex, and education, we used multivariable testing to adjust results appropriately.

For the first question (factors influencing brain health), responses of “very strong” and “strong” were classified as indicating an association between the question and response category, while the remaining options (“moderate,” “weak” and “no influence”) were categorized as indicating no association. Similarly, in the second question (life periods to take care of one’s brain), responses of “very important” and “important” were classified as indicating that respondents considered the life period as important to take care of the brain, indicating a positive association between the question and response category, whereas responses of the remaining “moderately important” and “not important”) were classified as indicating that the respondents considered the life period as not so important or not important. The third question was already on a binary scale, where responses were

logged by selecting from a list of diseases and disorders associated with brain health. For each category, separate predictive models for (1) age, (2) gender, (3) education, (4) relationship status, (5) experience or education in health care, (6) experience with illness, (7) experience of being a caregiver for someone with a brain disease, (8) rating of own cognitive health, and (9) rating of own mental health as predictors were computed.

Demographic variables with more than 3 response categories were reduced to aid interpretation of results. Education was reduced to whether the subject had higher education (university degree) or not. Age was reduced to three categories, “youngest” (those below 40 years), “middle-aged” (those between 40 and 60 years) and “oldest” (those above 60 years, the largest response group). Gender was reduced to three categories, “woman,” “man” and “other/prefer not to tell.” The ratings of subjects’ own mental and cognitive health were reduced to two categories, one for those rating their health as average or above, and those rating their health as below average. Relationship was reduced to those being in a stable relationship (married and domestic partnerships) or not. The base comparison groups for each predictor variable were set as the category where there was the highest number of subjects. Finally, the STROBE cross sectional reporting guidelines were used<sup>30</sup>.

## RESULTS

### Respondent characteristics

In total, 27,590 respondents from 81 countries completed the survey. 99.9% of respondents (n=27,552) completed the first question, 99.8% (n=27,536) completed the second question and 99.8% (n=27,530) completed the third question. All respondents completed the demographic questions.

### Table 1. Number of respondents by country

| Country                              | No of respondents | % of total |
|--------------------------------------|-------------------|------------|
| United Kingdom                       | 10,160            | 36.8       |
| Netherlands                          | 7,023             | 25.5       |
| Norway                               | 3,549             | 12.9       |
| Spain                                | 2,095             | 7.6        |
| Denmark                              | 1,101             | 4.0        |
| Germany                              | 1,060             | 3.8        |
| Sweden                               | 760               | 2.8        |
| Italy                                | 311               | 1.1        |
| Ukraine                              | 311               | 1.1        |
| Hungary                              | 187               | 0.7        |
| USA                                  | 165               | 0.6        |
| Slovenia                             | 148               | 0.5        |
| Turkey                               | 139               | 0.5        |
| Belgium                              | 115               | 0.4        |
| Other (<100 respondents per country) | 466               | 1.7        |
| <b>Total</b>                         | <b>27,590</b>     | <b>100</b> |

**Table 1** provides an overview of the number of respondents by country. The respondents predominantly lived in Europe (98%) including the United Kingdom (36.8%), the Netherlands (25.5%), Norway (12.9%), Spain (7.6%), Denmark (4.0%), Germany (3.8%), and Sweden (2.8%). Respondents outside Europe primarily resided in the United States (0.6%) and Turkey (0.5%). Due to large variation in the number of responses between countries, and varying recruitment strategies from one country to another, making meaningful comparisons of responses between countries is hardly feasible. We thus only provide, below, results for the whole sample across countries.

**Table 2** provides an overview of the demographic characteristics of the whole sample. The respondents were predominantly middle-aged (41-60: 37.4%) or older (>60: 46.2%), women (71.1%), married or in a relationship (71.8%) and highly educated (68.6%). About half of respondents (51.4%) reported being in paid employment and a third (38.5%) having an educational or employment experience in health care. The respondents largely rated their cognitive health (93.9%) and their mental health (86.8%) as average or above average. 40.4% of respondents reported having a long-standing illness, disability, or health problem. 46.5% reported having an experience of looking after a family member with brain disease, and 43.2% an experience of participating in brain research. A majority of respondents (57%) had been recruited through the research registries Join Dementia



1  
2 Research<sup>31</sup> in the United Kingdom and Hersenonderzoek.nl<sup>32</sup> in the Netherlands. The demographic  
3  
4 characteristics of respondents in the seven European countries with most responses is provided in  
5  
6 **supplementary material 4.**  
7  
8  
9  
10  
11  
12  
13  
14  
15  
16  
17  
18  
19  
20  
21  
22  
23  
24  
25  
26  
27  
28  
29  
30  
31  
32  
33  
34  
35  
36  
37  
38  
39  
40  
41  
42  
43  
44  
45  
46  
47  
48  
49  
50  
51  
52  
53  
54  
55  
56  
57  
58  
59  
60

For peer review only

**Table 2. Demographic characteristics of the whole sample**

| <b>Respondents</b>                                           | <b>No of respondents</b> | <b>%</b>     |
|--------------------------------------------------------------|--------------------------|--------------|
| <b>Gender</b>                                                |                          |              |
| Women                                                        | 19,626                   | 71.1         |
| Men                                                          | 7,833                    | 28.4         |
| Other                                                        | 131                      | 0.5          |
| <b>Total</b>                                                 | <b>27,590</b>            | <b>100.0</b> |
| <b>Age range (years)</b>                                     |                          |              |
| 18 – 40                                                      | 4,502                    | 16.4         |
| 41 – 60                                                      | 10,328                   | 37.4         |
| > 60                                                         | 12,760                   | 46.2         |
| <b>Education</b>                                             |                          |              |
| Higher education                                             | 18,925                   | 68.6         |
| Lower education                                              | 8,665                    | 31.4         |
| <b>Relationship status</b>                                   |                          |              |
| Yes                                                          | 19,819                   | 71.8         |
| No                                                           | 7,771                    | 28.2         |
| <b>Occupation*</b>                                           |                          |              |
| Employed for wages                                           | 14,181                   | 51.4         |
| Retired                                                      | 10,550                   | 38.2         |
| Other                                                        | 9,708                    | 35.2         |
| <b>Employment and/or education in health care</b>            |                          |              |
| No                                                           | 16,955                   | 61.5         |
| Yes                                                          | 10,635                   | 38.5         |
| <b>Participation in brain research</b>                       |                          |              |
| No                                                           | 15,671                   | 56.8         |
| Yes                                                          | 11,919                   | 43.2         |
| <b>Self-rated cognitive health</b>                           |                          |              |
| Below average                                                | 1,661                    | 6.1          |
| Average or above average                                     | 25,929                   | 93.9         |
| <b>Self-rated mental health</b>                              |                          |              |
| Below average                                                | 3,632                    | 13.2         |
| Average or above average                                     | 23,958                   | 86.8         |
| <b>Experience of illness, disability, or health problem</b>  |                          |              |
| No                                                           | 16,451                   | 59.6         |
| Yes                                                          | 11,139                   | 40.4         |
| <b>Experience as caregiver of patient with brain disease</b> |                          |              |
| No                                                           | 14,762                   | 53.5         |
| Yes                                                          | 12,828                   | 46.5         |

\* Percentages add up to >100% and N>27590 because multiple responses were allowed

## Factors influencing brain health

**Figure 1** shows how many respondents rated each factor as having strong or very strong influence on brain health. Most respondents rated substance use (92% of participants), physical health (87%), sleeping habits (85%), social environment (83%) and genetics (83%) as having a strong/very strong influence on brain health, followed by life goals (72%), physical environment (72%), diet (71%), and socio-economic factors such as education (61%), profession (56%) and income (36%). Other respondents rated the factors as having a moderate, weak or no influence on brain health. A detailed description of how factors were rated by all respondents according to a 5-item Likert scale is provided in the **supplementary material 2**, section 1.1 to 1.11).

Differences in response patterns were observed between demographic groups of respondents (**Table 3**). Men were less likely than women to consider factors such as substance use (odds ratio (OR) 0.66, 99% confidence interval (CI) 0.58-0.74), sleeping habits (OR 0.68, 99% CI 0.62-0.74) and diet (OR 0.70, 99% CI 0.65-0.75) as having strong or very strong influence on the brain. In contrast, men were more prone to rate profession (OR 1.18, 99% CI 1.10-1.27) and education (OR 1.13, 99% CI 1.05-1.21) as important. After controlling for educational level and age, these effects remained significant. Respondents with low education put less emphasis on factors such as education (OR 0.62, 99% CI 0.58-0.66), physical health (OR 0.73, 99% CI 0.66-0.81), profession (OR 0.75, 99% CI 0.71-0.81) and substance use (OR 0.75, 99% CI 0.67-0.85) as compared with highly educated respondents. However, they had higher odds of considering income (OR 1.11, 99% CI 1.04-1.19) and physical environment (OR 1.06, 99% CI 0.98-1.14) as having a strong/very strong influence on brain health.

Respondents older than 60 years gave more importance to income than participants below 40 years of age (OR 0.81, 99% CI 0.73-0.89) and respondents aged 41 to 60 years (OR 0.98, 99% CI 0.91-1.05). The same was observed for having meaningful goals in life. In contrast, importance given to sleep decreased with age and respondents below 40 years of age (OR 2.78, 99% CI 2.39-3.23), and respondents aged 41-60 years (OR 2.06, 99% CI 1.87-2.28) more often rated sleep as having a

1  
2 strong/very strong influence on brain health as compared with the respondents older than 60 years.  
3  
4 The same accounted for factors such as social environment, diet, and profession.  
5  
6  
7 Respondents with a higher education level, respondents with a reported education or experience in  
8  
9 health care, respondents who self-rated their cognitive and mental health as average or above, and  
10  
11 women were more prone to rate all factors as having a strong or very strong influence on brain health  
12  
13 (see **supplementary material 5**, section 1). In contrast, respondents who self-rated their cognitive and  
14  
15 mental health as below average were less likely to rate all factors as having a strong or very strong  
16  
17 influence on brain health, with one notable exception. Respondents rating their mental health as  
18  
19 below average were more likely to rate sleep as important (OR 1.33, 99% CI 1.16-1.53) as compared  
20  
21 with respondents rating their mental health as average or above. Likewise, respondents in a stable  
22  
23 relationship were less prone to rate sleep as important (OR 0.81, 99% CI 0.74-0.89), and more prone  
24  
25 to rate genetics as important (OR 1.20, 99% CI 1.11-1.31) as compared with other respondents not in  
26  
27 a stable relationship.  
28  
29  
30  
31  
32  
33  
34  
35  
36  
37  
38  
39  
40  
41  
42  
43  
44  
45  
46  
47  
48  
49  
50  
51  
52  
53  
54  
55  
56  
57  
58  
59  
60

**Table 3 – Factors believed to have a strong influence on brain health by demographic groups. Odd ratios (OR) and 99% confidence intervals (CI).**

| Variable         | Characteristics   | Substance use        |      |           | Genetics           |      |           | Physical health |      |           |
|------------------|-------------------|----------------------|------|-----------|--------------------|------|-----------|-----------------|------|-----------|
|                  |                   | %                    | OR   | 99% CI    | %                  | OR   | 99%CI     | %               | OR   | 99%CI     |
| Gender           | Women             | 93.3                 |      |           | 83.4               |      |           | 88.3            |      |           |
|                  | Men               | 90.1                 | 0.66 | 0.58-0.74 | 80.0               | 0.79 | 0.73-0.87 | 85.3            | 0.77 | 0.70-0.85 |
|                  | Other/Undisclosed | 85.8                 | 0.44 | 0.23-0.84 | 69.8               | 0.46 | 0.28-0.76 | 85.0            | 0.75 | 0.39-1.43 |
| Age              | >60 years         | 90.5                 |      |           | 83.4               |      |           | 86.6            |      |           |
|                  | 41-60 years       | 94.2                 | 1.70 | 1.49-1.95 | 83.6               | 1.01 | 0.92-1.11 | 88.1            | 1.14 | 1.03-1.26 |
|                  | <40 years         | 93.2                 | 1.43 | 1.20-1.69 | 76.6               | 0.65 | 0.58-0.72 | 88.4            | 1.17 | 1.02-1.34 |
| Education        | Higher education  | 93.0                 |      |           | 82.6               |      |           | 88.6            |      |           |
|                  | Lower education   | 90.9                 | 0.75 | 0.67-0.85 | 81.8               | 0.94 | 0.87-1.03 | 85.0            | 0.73 | 0.66-0.81 |
| Health care exp. | No                | 91.3                 |      |           | 81.7               |      |           | 85.7            |      |           |
|                  | Yes               | 94.0                 | 1.50 | 1.32-1.70 | 83.4               | 1.12 | 1.03-1.22 | 90.2            | 1.53 | 1.39-1.70 |
| Variable         | Characteristics   | Sleeping habits      |      |           | Social environment |      |           | Life goals      |      |           |
|                  |                   | %                    | OR   | 99% CI    | %                  | OR   | 99% CI    | %               | OR   | 99%CI     |
| Gender           | Women             | 86.5                 |      |           | 84.1               |      |           | 73.5            |      |           |
|                  | Men               | 81.3                 | 0.68 | 0.62-0.74 | 79.2               | 0.72 | 0.66-0.79 | 71.1            | 0.89 | 0.82-0.96 |
|                  | Other/Undisclosed | 87.4                 | 1.08 | 0.54-2.16 | 90.4               | 1.79 | 0.81-3.91 | 70.9            | 0.88 | 0.53-1.46 |
| Age              | >60 years         | 79.6                 |      |           | 79.9               |      |           | 74.3            |      |           |
|                  | 41-60 years       | 89.0                 | 2.06 | 1.87-2.28 | 84.1               | 1.33 | 1.22-1.46 | 73.3            | 0.95 | 0.88-1.03 |
|                  | <40 years         | 91.6                 | 2.78 | 2.39-3.23 | 87.3               | 1.73 | 1.52-1.97 | 67.2            | 0.71 | 0.64-0.78 |
| Education        | Higher education  | 85.8                 |      |           | 83.6               |      |           | 73.2            |      |           |
|                  | Lower education   | 83.4                 | 0.83 | 0.76-0.91 | 80.9               | 0.83 | 0.76-0.91 | 71.9            | 0.94 | 0.87-1.01 |
| Health care exp. | No                | 83.6                 |      |           | 80.6               |      |           | 70.9            |      |           |
|                  | Yes               | 87.3                 | 1.35 | 1.23-1.48 | 86.1               | 1.48 | 1.36-1.62 | 75.7            | 1.28 | 1.19-1.37 |
| Variable         | Characteristics   | Physical environment |      |           | Diet               |      |           | Education       |      |           |
|                  |                   | %                    | OR   | 99%CI     | %                  | OR   | 99%CI     | %               | OR   | 99%CI     |
| Gender           | Women             | 72.7                 |      |           | 73.7               |      |           | 59.8            |      |           |
|                  | Men               | 69.6                 | 0.86 | 0.80-0.93 | 66.2               | 0.70 | 0.65-0.75 | 62.7            | 1.13 | 1.05-1.21 |
|                  | Other/Undisclosed | 77.8                 | 1.31 | 0.76-2.29 | 72.4               | 0.94 | 0.56-1.57 | 64.6            | 1.22 | 0.76-1.98 |
| Age              | >60 years         | 69.8                 |      |           | 66.7               |      |           | 60.9            |      |           |
|                  | 41-60 years       | 74.3                 | 1.25 | 1.16-1.35 | 75.6               | 1.54 | 1.43-1.67 | 59.2            | 0.93 | 0.87-1.00 |
|                  | <40 years         | 71.7                 | 1.10 | 0.99-1.21 | 76.1               | 1.59 | 1.44-1.77 | 63.4            | 1.11 | 1.01-1.22 |
| Education        | Higher education  | 71.5                 |      |           | 73.1               |      |           | 64.3            |      |           |
|                  | Lower education   | 72.6                 | 1.06 | 0.98-1.14 | 68.2               | 0.79 | 0.73-0.85 | 52.6            | 0.62 | 0.58-0.66 |
| Health care exp. | No                | 70.5                 |      |           | 69.0               |      |           | 58.0            |      |           |
|                  | Yes               | 74.0                 | 1.19 | 1.11-1.28 | 75.6               | 1.39 | 1.29-1.49 | 64.8            | 1.33 | 1.25-1.42 |
| Variable         | Characteristics   | Profession           |      |           | Income             |      |           |                 |      |           |
|                  |                   | %                    | OR   | 99%CI     | %                  | OR   | 99%CI     |                 |      |           |
| Gender           | Women             | 54.6                 |      |           | 36.2               |      |           |                 |      |           |
|                  | Men               | 58.7                 | 1.18 | 1.10-1.27 | 35.0               | 0.95 | 0.88-1.02 |                 |      |           |
|                  | Other/Undisclosed | 54.3                 | 0.99 | 0.62-1.57 | 40.2               | 1.18 | 0.74-1.89 |                 |      |           |
| Age              | >60 years         | 53.2                 |      |           | 36.8               |      |           |                 |      |           |
|                  | 41-60 years       | 57.0                 | 1.16 | 1.08-1.24 | 36.3               | 0.98 | 0.91-1.05 |                 |      |           |
|                  | <40 years         | 60.2                 | 1.33 | 1.21-1.46 | 32.0               | 0.81 | 0.73-0.89 |                 |      |           |
| Education        | Higher education  | 58.0                 |      |           | 35.1               |      |           |                 |      |           |
|                  | Lower education   | 51.0                 | 0.75 | 0.71-0.81 | 37.5               | 1.11 | 1.04-1.19 |                 |      |           |
| Health care exp. | No                | 53.9                 |      |           | 33.5               |      |           |                 |      |           |
|                  | Yes               | 58.8                 | 1.23 | 1.15-1.31 | 39.6               | 1.30 | 1.22-1.39 |                 |      |           |

% indicates proportion of participants rating this factor as having a 'strong' or 'very strong' influence on brain health, with the remainder of participants rating it as 'moderate,' 'weak' or 'no influence.'

## Life periods to look after ones' brain

**Figure 2** shows that the respondents rated most life periods as important or very important for the brain (95-96%), whereas the prenatal stage (in the womb/before birth) was rated as important or very important by 84% of respondents (**supplementary material 2**, section 2).

**Table 4** shows that men were less likely to consider life periods such as the middle age (OR 0.41, 99% CI 0.35-0.48) and old age (OR 0.41, 99% CI 0.35-0.49) as important as compared with women. This was also observed when controlling for age and education. Respondents with lower education were also less likely to rate life periods as important as compared with higher educated respondents, except for young adulthood (OR 1.06, 99% CI 0.90-1.24). The youngest respondents (<40) were less likely to consider middle age (OR 0.82, 99% CI 0.67-1.00) and old age as important (OR 0.55, 99% CI 0.45-0.67) compared with the oldest respondents (>60). Rather, the youngest respondents were more likely to consider childhood (OR 1.89, 99% CI 1.51-2.37) and adolescence important (OR 2.14, 99% CI 1.60-2.85) as compared with the oldest respondents (>60).

Respondents with an education or experience in health care were more prone to consider the life periods as important, especially pregnancy (OR 1.91, 99% CI 1.74-2.10) and childhood (OR 2.06, 99% CI 1.74-2.43) as compared with other respondents with no experience (**supplementary material 5**, section 2). Respondents with lower education were consistently less likely to consider the life periods as important as compared with respondents with higher education, except for young adulthood, which they were more likely to consider important as compared with the highly educated (OR 1.06, 99% CI 0.90-1.24). Respondents in a stable relationship were more prone to consider important taking care of the brain in old age (OR 1.21, 99% CI 1.03-1.41) as compared with respondents not in a stable relationship.

**Table 4 – Life periods considered important to take care of one’s brain by demographic groups. OR and 99% CI.**

| Variable         | Characteristics   | In the womb             |      |           | Childhood (0-12)   |      |           | Adolescence (13-18) |      |           |
|------------------|-------------------|-------------------------|------|-----------|--------------------|------|-----------|---------------------|------|-----------|
|                  |                   | %                       | OR   | 99% CI    | %                  | OR   | 99%CI     | %                   | OR   | 99%CI     |
| Gender           | Women             | 85.9                    |      |           | 95.7               |      |           | 97.0                |      |           |
|                  | Men               | 78.0                    | 0.58 | 0.53-0.63 | 93.0               | 0.59 | 0.51-0.69 | 95.6                | 0.68 | 0.57-0.81 |
|                  | Other/Undisclosed | 86.4                    | 1.04 | 0.53-2.04 | 95.2               | 0.89 | 0.30-2.63 | 96.0                | 0.75 | 0.23-2.44 |
| Age              | >60 years         | 80.7                    |      |           | 93.4               |      |           | 95.5                |      |           |
|                  | 41-60 years       | 86.2                    | 1.49 | 1.36-1.64 | 96.2               | 1.78 | 1.51-2.09 | 97.3                | 1.71 | 1.41-2.08 |
|                  | <40 years         | 86.1                    | 1.48 | 1.31-1.68 | 96.4               | 1.89 | 1.51-2.37 | 97.9                | 2.14 | 1.60-2.85 |
| Education        | Higher education  | 86.0                    |      |           | 95.8               |      |           | 97.0                |      |           |
|                  | Lower education   | 78.5                    | 0.59 | 0.54-0.65 | 92.9               | 0.57 | 0.50-0.66 | 95.6                | 0.67 | 0.56-0.80 |
| Health care exp. | No                | 80.5                    |      |           | 93.7               |      |           | 95.9                |      |           |
|                  | Yes               | 88.8                    | 1.91 | 1.74-2.10 | 96.8               | 2.06 | 1.74-2.43 | 97.7                | 1.79 | 1.48-2.18 |
| Variable         | Characteristics   | Young adulthood (19-45) |      |           | Middle age (45-65) |      |           | Old age (>65)       |      |           |
|                  |                   | %                       | OR   | 99% CI    | %                  | OR   | 99%CI     | %                   | OR   | 99%CI     |
| Gender           | Women             | 96.2                    |      |           | 97.0               |      |           | 97.1                |      |           |
|                  | Men               | 93.4                    | 0.56 | 0.48-0.65 | 93.0               | 0.41 | 0.35-0.48 | 93.2                | 0.41 | 0.35-0.49 |
|                  | Other/Undisclosed | 92.8                    | 0.51 | 0.21-1.24 | 88.8               | 0.24 | 0.12-0.51 | 92.0                | 0.35 | 0.15-0.82 |
| Age              | >60 years         | 94.5                    |      |           | 95.3               |      |           | 96.2                |      |           |
|                  | 41-60 years       | 96.5                    | 1.59 | 1.34-1.89 | 97.2               | 1.68 | 1.40-2.03 | 96.8                | 1.19 | 0.98-1.43 |
|                  | <40 years         | 95.4                    | 1.21 | 0.98-1.50 | 94.3               | 0.82 | 0.67-1.00 | 93.3                | 0.55 | 0.45-0.67 |
| Education        | Higher education  | 95.3                    |      |           | 95.9               |      |           | 96.2                |      |           |
|                  | Lower education   | 95.6                    | 1.06 | 0.90-1.24 | 95.6               | 0.93 | 0.78-1.09 | 95.3                | 0.80 | 0.67-0.94 |
| Health care exp. | No                | 94.7                    |      |           | 95.2               |      |           | 95.4                |      |           |
|                  | Yes               | 96.6                    | 1.60 | 1.36-1.89 | 96.8               | 1.53 | 1.29-1.82 | 96.7                | 1.41 | 1.19-1.68 |

% indicates proportion of participants rating this life period as ‘important’ or ‘very important,’ with the remainder of participants rating it as ‘not important’ or ‘moderately important.’

### Diseases and disorders associated with the brain

Figure 3 shows that 99% of the respondents associated Alzheimer’s disease (AD) and other forms of dementia with the brain. The next most often selected disorders were mental disorders like schizophrenia (96%), depression (95%), bipolar disorder (92%), anxiety (91%), and addiction (88%). Disorders least often associated with the brain included cancer (32%), hypertension (32%), diabetes (16%), and arthritis (5%).

Women were more likely than men to associate the diseases with the brain, and this was particularly observed for bipolar disorder (OR 0.47, 99% CI 0.42-0.53), stroke (OR 0.53, 99% CI 0.48-0.58) and schizophrenia (OR 0.64, 99% CI 0.54-0.75) (Table 5). A similar trend was observed among lower educated respondents, who were less likely to select disorders such as bipolar disorder (OR 0.42, 99% CI 0.38-0.47) and AD/dementia (OR 0.48, 99% CI 0.34-0.67) as compared with highly educated respondents.

1  
2 The youngest respondents (aged <40) were less likely to associate with the brain diseases often  
3  
4 appearing in old age such as AD/dementia (OR 0.35, 99% CI 0.23-0.51), stroke (OR 0.76, 99% CI 0.67-  
5  
6 0.87), hypertension (OR 0.65, 99% CI 0.59-0.72), and Parkinson's disease (OR 0.80, 99% CI 0.71-0.91),  
7  
8 as compared with respondents aged >60. In contrast, they more often selected disorders such as  
9  
10 migraine (OR 2.18, 99% CI 1.91-2.48) and bipolar disorder (OR 1.90, 99% CI 1.59-2.26), addiction (OR  
11  
12 1.50, 99% CI 1.29-1.74) or anxiety (OR 1.44, 99% CI 1.23-1.70) as compared with respondents aged  
13  
14 >60.  
15  
16

17  
18 Respondents who self-assessed their mental health to be below average were less likely to associate  
19  
20 the given diseases/disorders above with the brain as compared with other respondents, although they  
21  
22 had higher odds of considering mental disorders such as anxiety (OR 1.51, 99% CI 1.26-1.82),  
23  
24 depression (OR 1.40, 99% CI 1.10-1.78), bipolar disorder (OR 1.29, 99% CI 1.07-1.55) and addiction (OR  
25  
26 1.12, 99% CI 0.97-1.30) as associated with the brain. Respondents with an experience of disease were  
27  
28 more likely, as compared with others with no such experience, to associate disorders such as arthritis  
29  
30 (OR 1.59, 99% CI 1.38-1.84), diabetes (OR 1.25, 99% CI 1.15-1.37) and hypertension (OR 1.20, 99% CI  
31  
32 1.12-1.29) with the brain (**supplementary material 5**, section 3). Respondents in a stable relationship  
33  
34 were more likely to associate Alzheimer's disease with the brain (OR 1.91, 99% CI 1.36-2.68) as  
35  
36 compared with respondents not in a stable relationship. However, this association did not hold when  
37  
38 controlling for age and education level.  
39  
40  
41  
42  
43  
44  
45  
46  
47  
48  
49  
50  
51  
52  
53  
54  
55  
56  
57  
58  
59  
60



**Table 5 – Diseases and disorders associated with the brain by demographic groups. OR and 99%CI.**

| Variable         | Characteristics   | AD and dementia  |      |           | Schizophrenia                                                                                                                                                                                  |      |           | Depression |      |           |
|------------------|-------------------|------------------|------|-----------|------------------------------------------------------------------------------------------------------------------------------------------------------------------------------------------------|------|-----------|------------|------|-----------|
|                  |                   | %                | OR   | 99% CI    | %                                                                                                                                                                                              | OR   | 99%CI     | %          | OR   | 99%CI     |
| Gender           | Women             | 99.4             |      |           | 96.4                                                                                                                                                                                           |      |           | 95.6       |      |           |
|                  | Men               | 98.5             | 0.40 | 0.29-0.56 | 94.5                                                                                                                                                                                           | 0.64 | 0.54-0.75 | 93.8       | 0.70 | 0.60-0.81 |
|                  | Other/Undisclosed | 100              |      |           | 95.2                                                                                                                                                                                           | 0.74 | 0.25-2.18 | 96.0       | 1.11 | 0.34-3.61 |
| Age              | >60 years         | 99.3             |      |           | 95.1                                                                                                                                                                                           |      |           | 94.2       |      |           |
|                  | 41-60 years       | 99.4             | 1.08 | 0.71-1.65 | 96.6                                                                                                                                                                                           | 1.47 | 1.23-1.75 | 96.1       | 1.51 | 1.29-1.78 |
|                  | <40 years         | 98.0             | 0.35 | 0.23-0.51 | 96.3                                                                                                                                                                                           | 1.34 | 1.06-1.69 | 95.4       | 1.29 | 1.05-1.59 |
| Education        | Higher education  | 99.3             |      |           | 96.5                                                                                                                                                                                           |      |           | 95.6       |      |           |
|                  | Lower education   | 98.6             | 0.48 | 0.34-0.67 | 94.5                                                                                                                                                                                           | 0.62 | 0.53-0.72 | 94.0       | 0.72 | 0.62-0.84 |
| Health care exp. | No                | 98.9             |      |           | 95.3                                                                                                                                                                                           |      |           | 94.6       |      |           |
|                  | Yes               | 99.5             | 2.37 | 1.57-3.56 | 96.9                                                                                                                                                                                           | 1.52 | 1.28-1.81 | 96.0       | 1.38 | 1.18-1.61 |
| Variable         | Characteristics   | Bipolar disorder |      |           | Anxiety                                                                                                                                                                                        |      |           | Addiction  |      |           |
|                  |                   | %                | OR   | 99% CI    | %                                                                                                                                                                                              | OR   | 99%CI     | %          | OR   | 99%CI     |
| Gender           | Women             | 93.6             |      |           | 91.4                                                                                                                                                                                           |      |           | 90.0       |      |           |
|                  | Men               | 87.3             | 0.47 | 0.42-0.53 | 89.4                                                                                                                                                                                           | 0.79 | 0.71-0.89 | 84.4       | 0.60 | 0.54-0.67 |
|                  | Other/Undisclosed | 93.7             | 1.01 | 0.39-2.60 | 95.2                                                                                                                                                                                           | 1.88 | 0.64-5.55 | 90.5       | 1.05 | 0.48-2.31 |
| Age              | >60 years         | 88.9             |      |           | 89.0                                                                                                                                                                                           |      |           | 86.6       |      |           |
|                  | 41-60 years       | 94.6             | 2.17 | 1.90-2.49 | 92.6                                                                                                                                                                                           | 1.54 | 1.37-1.74 | 89.8       | 1.37 | 1.23-1.52 |
|                  | <40 years         | 93.8             | 1.90 | 1.59-2.26 | 92.1                                                                                                                                                                                           | 1.44 | 1.23-1.70 | 90.6       | 1.50 | 1.29-1.74 |
| Education        | Higher education  | 94.0             |      |           | 91.6                                                                                                                                                                                           |      |           | 90.0       |      |           |
|                  | Lower education   | 87.0             | 0.42 | 0.38-0.47 | 89.1                                                                                                                                                                                           | 0.75 | 0.67-0.84 | 85.0       | 0.63 | 0.57-0.69 |
| Health care exp. | No                | 90.0             |      |           | 90.2                                                                                                                                                                                           |      |           | 86.0       |      |           |
|                  | Yes               | 94.7             | 2.00 | 1.76-2.28 | 92.0                                                                                                                                                                                           | 1.25 | 1.11-1.40 | 92.4       | 1.97 | 1.77-2.20 |
| Variable         | Characteristics   | Stroke           |      |           | Parkinson's disease                                                                                                                                                                            |      |           | Migraine   |      |           |
|                  |                   | %                | OR   | 99% CI    | %                                                                                                                                                                                              | OR   | 99%CI     | %          | OR   | 99%CI     |
| Gender           | Women             | 89.9             |      |           | 86.9                                                                                                                                                                                           |      |           |            |      |           |
|                  | Men               | 82.4             | 0.53 | 0.48-0.58 | 84.3                                                                                                                                                                                           | 0.81 | 0.73-0.89 | 83.5       |      |           |
|                  | Other/Undisclosed | 89.7             | 0.98 | 0.46-2.08 | 84.9                                                                                                                                                                                           | 0.85 | 0.45-1.62 | 79.7       | 0.78 | 0.71-0.85 |
| Age              | >60 years         | 87.7             |      |           | 86.1                                                                                                                                                                                           |      |           | 77.6       |      |           |
|                  | 41-60 years       | 89.3             | 1.16 | 1.04-1.29 | 87.5                                                                                                                                                                                           | 1.13 | 1.25-1.02 | 86.0       | 1.78 | 1.62-1.95 |
|                  | <40 years         | 84.5             | 0.76 | 0.67-0.87 | 83.2                                                                                                                                                                                           | 0.80 | 0.71-0.91 | 88.3       | 2.18 | 1.91-2.48 |
| Education        | Higher education  | 88.3             |      |           | 87.9                                                                                                                                                                                           |      |           | 84.3       |      |           |
|                  | Lower education   | 86.7             | 0.87 | 0.79-0.96 | 82.1                                                                                                                                                                                           | 0.63 | 0.57-0.69 | 78.6       | 0.69 | 0.63-0.75 |
| Health care exp. | No                | 84.5             |      |           | 83.1                                                                                                                                                                                           |      |           | 79.5       |      |           |
|                  | Yes               | 93.0             | 2.44 | 2.18-2.73 | 90.9                                                                                                                                                                                           | 2.04 | 1.85-2.26 | 87.2       | 1.76 | 1.61-1.92 |
| Variable         | Characteristics   | Cancer           |      |           | Hypertension                                                                                                                                                                                   |      |           | Diabetes   |      |           |
|                  |                   | %                | OR   | 99% CI    | %                                                                                                                                                                                              | OR   | 99%CI     | %          | OR   | 99%CI     |
| Gender           | Women             | 33.8             |      |           | 33.7                                                                                                                                                                                           |      |           | 16.7       |      |           |
|                  | Men               | 27.9             | 0.76 | 0.70-0.82 | 26.5                                                                                                                                                                                           | 0.71 | 0.66-0.77 | 13.8       | 0.80 | 0.73-0.88 |
|                  | Other/Undisclosed | 37.3             | 1.16 | 0.72-1.88 | 41.3                                                                                                                                                                                           | 1.38 | 0.86-2.20 | 25.4       | 1.70 | 1.00-2.89 |
| Age              | >60 years         | 28.5             |      |           | 34.2                                                                                                                                                                                           |      |           | 15.3       |      |           |
|                  | 41-60 years       | 34.1             | 1.30 | 1.21-1.40 | 31.5                                                                                                                                                                                           | 0.88 | 0.82-0.95 | 17.2       | 1.15 | 1.05-1.27 |
|                  | <40 years         | 38.2             | 1.55 | 1.41-1.70 | 25.4                                                                                                                                                                                           | 0.65 | 0.59-0.72 | 14.7       | 0.96 | 0.84-1.09 |
| Education        | Higher education  | 34.2             |      |           | 33.5                                                                                                                                                                                           |      |           | 17.3       |      |           |
|                  | Lower education   | 27.7             | 0.74 | 0.68-0.79 | 27.9                                                                                                                                                                                           | 0.77 | 0.71-0.83 | 12.8       | 0.70 | 0.64-0.77 |
| Health care exp. | No                | 27.4             |      |           | 24.9                                                                                                                                                                                           |      |           | 10.6       |      |           |
|                  | Yes               | 39.7             | 1.74 | 1.63-1.87 | 42.6                                                                                                                                                                                           | 2.24 | 2.09-2.39 | 24.3       | 2.71 | 2.49-2.96 |
| Variable         | Characteristics   | Arthritis        |      |           | <i>% indicates proportion of participants rating this disorder or disease as 'associated with the brain,' with the remainder of participants rating it as 'not associated with the brain.'</i> |      |           |            |      |           |
|                  |                   | %                | OR   | 99% CI    |                                                                                                                                                                                                |      |           |            |      |           |
| Gender           | Women             | 5.1              |      |           |                                                                                                                                                                                                |      |           |            |      |           |
|                  | Men               | 3.9              | 0.75 | 0.63-0.89 |                                                                                                                                                                                                |      |           |            |      |           |
|                  | Other/Undisclosed | 6.3              | 1.25 | 0.49-3.23 |                                                                                                                                                                                                |      |           |            |      |           |
| Age              | >60 years         | 4.5              |      |           |                                                                                                                                                                                                |      |           |            |      |           |
|                  | 41-60 years       | 5.2              | 1.15 | 0.98-1.35 |                                                                                                                                                                                                |      |           |            |      |           |
|                  | <40 years         | 4.6              | 1.01 | 0.81-1.25 |                                                                                                                                                                                                |      |           |            |      |           |
| Education        | Higher education  | 4.9              |      |           |                                                                                                                                                                                                |      |           |            |      |           |
|                  | Lower education   | 4.6              | 0.94 | 0.80-1.11 |                                                                                                                                                                                                |      |           |            |      |           |
| Health care exp. | No                | 3.4              |      |           |                                                                                                                                                                                                |      |           |            |      |           |
|                  | Yes               | 7.0              | 2.12 | 1.83-2.46 |                                                                                                                                                                                                |      |           |            |      |           |

## DISCUSSION

### Summary of findings

To the best of our knowledge, this study was the first and largest survey to investigate public perceptions of brain health across countries using an online questionnaire available in multiple languages. Our respondents considered certain behaviors such as substance use (i.e., smoking, drugs, and alcohol consumption) and factors such as lifestyle, physical health, genetics, and social environment important for brain health. Other factors included, in decreasing order of importance, diet, the physical environment and having goals that make life meaningful, followed by socio-economic factors such as income, profession, and education. The respondents rated all life periods as important for the brain although taking care of the brain in the womb (before birth) received relatively less attention. This question aimed to describe the life period during which one can take care of the fetal brain during pregnancy. It is possible that some respondents interpreted this life period as taking care of the mother's brain during pregnancy. However, regardless of how it was interpreted, taking care of the mother's and the fetus's brain is important and deserves attention.

Awareness was high of Alzheimer's disease and dementia affecting the brain. Our respondents more frequently associated mental disorders such as schizophrenia and depression with the brain as compared with neurological disorders such as stroke and Parkinson's disease, although it should be noted that both classes were most often ranked as associated. Since we partly relied on our network of stakeholders working in fields of relevance for brain health to recruit survey respondents, it is likely that our sample was more interested in cognitive and psychological aspects of brain health than the general population. Disorders that are not defined as brain diseases but have an impact on the brain, such as hypertension, diabetes, and arthritis, were perceived to be associated with the brain only to a small extent. Overall, women and highly educated respondents more often rated items as important than men and less educated participants. Men and women also differed in which factors they considered important for brain health.

### Relevance to previous research

1  
2 The high ranking of substance use as a factor influencing brain health is consistent with data from  
3  
4 surveys in Australia and the USA<sup>19 33</sup> but not from previous surveys in Ireland<sup>5</sup> or the Netherlands<sup>7</sup>  
5  
6 where other factors like cognitive activity were given more importance. A recent scoping review of  
7  
8 studies examining public perceptions of risk and protective factors related to cognitive health and  
9  
10 impairment reported that genetics was the most identified risk factor for Alzheimer's disease and  
11  
12 dementia<sup>20</sup>. In our survey, genetics was considered highly important for brain health. Likewise, our  
13  
14 respondents' high ranking of sleep corroborates results from a recent U.K.-wide survey in which  
15  
16 respondents perceived sleep as important for maintaining or improving cognitive skills <sup>34</sup>.  
17  
18

19  
20 Physical health was rated as highly important in our study in contrast to what previous surveys found<sup>7</sup>  
21  
22 <sup>18 19</sup>, which reported limited awareness of how high blood pressure, coronary heart disease, obesity  
23  
24 and plasma cholesterol levels influence brain health. Although our respondents rated physical health  
25  
26 as important, paradoxically, they associated hypertension with the brain to a limited extent. In our  
27  
28 questionnaire, we did not provide any example of what physical health entails, so we do not know  
29  
30 exactly how our respondents interpreted the question. Results across studies may also be difficult to  
31  
32 compare due to differences in the measures and instruments used. Our respondents less often  
33  
34 deemed diet to be of very strong importance for brain health relative to other lifestyle factors, in line  
35  
36 with previous studies<sup>5 35</sup>. Although the topic has been little explored, our participants' limited emphasis  
37  
38 on socio-economic factors is in line with results from an Australian survey on cognitive health <sup>19</sup>. With  
39  
40 few exceptions, most of our participants resided in high-income countries or upper-middle income  
41  
42 countries such as Turkey. Views regarding the importance of socio-economic factors for brain health  
43  
44 may differ in low- and middle-income countries.  
45  
46  
47  
48  
49

50 To our knowledge, few studies have investigated what life periods people consider important for  
51  
52 taking care of the brain. A recent global Ipsos survey (2021) looked at perceptions of the importance  
53  
54 of early life for a person's health and happiness in adulthood<sup>36</sup> and found that people did not consider  
55  
56 the early (first five) years as important for later health, compared with other periods of life. Previous  
57  
58 research has shown that focus is often put on old age, as it might be considered as a risk factor for  
59  
60

1  
2 cognitive decline<sup>37</sup>. In contrast, our respondents attributed high importance to childhood although  
3  
4 they tended to rank age ranges closer to their own as more important. Similarly, we have not found  
5  
6 studies specifically investigating which diseases people associate with the brain. Other surveys have  
7  
8 shown public awareness of dementia<sup>15</sup>, as confirmed by our results, despite limited knowledge of  
9  
10 disease mechanisms and risk and protective factors<sup>5</sup>, little concern regarding risk of developing  
11  
12 dementia<sup>16</sup>, and limited public awareness of the prevalence and characteristics of mental illnesses such  
13  
14 as schizophrenia and bipolar disorders<sup>9 10</sup>.  
15  
16

### 21 **Implications for policymakers**

22  
23  
24 Our sample was highly educated, mostly women probably interested in brain health, and therefore  
25  
26 not representative of the general population. Our survey, however, highlights that even in such  
27  
28 population, there are some knowledge gaps to be filled. Detailed information should be provided  
29  
30 about dietary habits and physical activity beneficial for physical health and for the brain. Our findings  
31  
32 indicate that people may underestimate the importance of risk factors such as diabetes and poor  
33  
34 vascular health for brain health, suggesting an avenue for improved public health messaging. Previous  
35  
36 research has shown that unmarried people are at higher risk of dementia as compared with people  
37  
38 living in stable relationships<sup>38</sup>. We observed that awareness of Alzheimer's disease was higher among  
39  
40 our respondents living in stable relationships. This may suggest the need for targeted brain health  
41  
42 information to single people. Men and women differed in their perceptions of factors influencing brain  
43  
44 health. Educational campaigns might need to consider these differences and leverage them for more  
45  
46 personalized messages.  
47  
48  
49

50  
51 Our respondents made a clear connection between mental health and brain health, which may be due  
52  
53 to their experience of the increasing societal burden of mental and addictive disorders<sup>39</sup>. The outbreak  
54  
55 of the covid-19 pandemic in 2020, with strong implications for mental health<sup>40</sup>, may also have  
56  
57 influenced responses. However, we cannot verify this as the survey was anonymous and no time logs  
58  
59 were recorded. Our results suggest that governments should give more attention to the reduction of  
60

1  
2 preventable or modifiable mental health risk factors, for instance by identifying individuals in early  
3  
4 stages of disease or creating social environments promoting psychological well-being<sup>41</sup>.  
5  
6  
7  
8  
9

### 10 **Strengths and limitations**

11  
12 We believe that our study has several strengths. First, we consulted representatives from patient and  
13  
14 civil society organizations such as patient organizations and national brain councils when developing  
15  
16 the survey questionnaire. They are knowledgeable about how the public processes health-related  
17  
18 information and helped strengthen the readability and relevance of our questions. The questions were  
19  
20 also piloted in a previous study<sup>24</sup> and at several public meetings. Second, we translated the survey into  
21  
22 14 languages, made it available online, and promoted it in Europe and beyond. This enabled us to  
23  
24 achieve a sample size up to 10 times larger than in previous comparable surveys<sup>19 7 42</sup>. Third, our survey  
25  
26 described brain health as encompassing both cognitive and mental health. This definition was more  
27  
28 comprehensive than in other studies, which often focused solely on one aspect of brain health such as  
29  
30 cognitive decline. This may make our results more relevant when discussing brain health promotion.  
31  
32  
33  
34

35  
36 Our study has limitations. Our sample is not representative of the general population. Our respondents  
37  
38 were predominantly highly educated, mostly women from the oldest segment of population reporting  
39  
40 good cognitive and mental health. This is probably due to our recruitment strategy. Several of the  
41  
42 Lifebrain cohorts<sup>23</sup> as well as the research registries we used to recruit participants included more  
43  
44 female, educated volunteers<sup>32</sup>. This may also be because women appear more concerned about  
45  
46 cognitive decline and the maintenance of cognitive skills<sup>34 43</sup> than men. Our respondents were probably  
47  
48 more interested in, and knowledgeable about, brain health than the general population. Although we  
49  
50 did not collect any ethnic data, we suspect that our sample was probably not ethnically and culturally  
51  
52 diverse. We also do not know whether people in developing countries would manifest different  
53  
54 perceptions to brain health, particularly the influence of socio-economic factors. Another limitation of  
55  
56 our study is that an online survey is more easily accessed by the most resourceful population groups  
57  
58 with digital connection and competence. We were aware of this limitation when conceiving the study  
59  
60

1  
2 but aimed to reach a large international sample and include respondents from the Lifebrain  
3 consortium. Using an online tool was the most appropriate strategy due to our limited resources and  
4 it facilitated anonymous collection of data. Finally, although great care was taken in the translation  
5 and back-translation process<sup>22</sup> and stakeholders in several countries helped adapt the survey to their  
6 local circumstances, there is a risk that our international respondents interpreted our questions slightly  
7 differently due to nuances in translations and the novelty of the concept of brain health<sup>24</sup>.  
8  
9  
10  
11  
12  
13  
14  
15  
16  
17  
18

## 19 **CONCLUSIONS AND FUTURE DIRECTIONS**

20  
21 Our findings reflect a relatively good understanding of some facets of brain health. Awareness was  
22 higher among highly educated, female respondents as compared to male and lowly educated  
23 respondents. Differences in perceptions of brain health were noted among specific segments of the  
24 population, suggesting that targeted policy actions towards these groups might be of relevance.  
25 Exploring how perceptions of brain health relate to intentions to follow brain-friendly lifestyles will  
26 also be of interest, knowing that such intentions may also depend on perceptions of risk<sup>44 45</sup> and the  
27 socio-economic, physical, and technological contexts in which people navigate<sup>46</sup>. Analysis of  
28 subsequent questions in this survey will provide some answers to this question.  
29  
30  
31  
32  
33  
34  
35  
36  
37  
38  
39

40 Future research should investigate views on brain health of diverse ethnic groups in Europe, following  
41 recent calls for more diversity in research<sup>47</sup> as well as explore views on brain health in non-Western  
42 countries due to cultural variations<sup>48</sup>. We did not compare results between countries due to varying  
43 sample size and recruitment strategies. Future research might investigate whether results differ  
44 between the three countries with most responses (United Kingdom, the Netherlands, Norway), and  
45 how any difference may have implications for brain health promotion at national levels. Future studies  
46 should also consider adopting alternative recruitment techniques and data collection platforms and  
47 include more men and respondents more representative of the general population.  
48  
49  
50  
51  
52  
53  
54  
55  
56  
57  
58  
59  
60

## Acknowledgments

We are grateful for the valuable help we received from many people to develop and disseminate the survey. This includes, but is not limited to, the Lifebrain research staff, the stakeholders who participated in Lifebrain workshops and public lectures, representatives from the Norwegian Brain Council, the Belgian Brain Council, the German Brain Council, the Brain Foundation Netherlands (Hersenstichting.nl), the Swedish Brain Foundation, the Women's Brain Project, the National University of Ostroh Academy in Ukraine, Join Dementia Research, Hersenonderzoek, patient organizations and professional societies in Europe and elsewhere. We thank the survey respondents for their contribution.

## Contributors

IBL, AMM, BBF, KPE, CAD, RBC, EZ, WFCB, KSM, AMJ, RAK, PG, DBF, LN, CAP, KBW, SD, LZ, MFI, and MTF were involved in the design and data collection of the study. AMM, KPE, ØS and EZs had full access to the raw data and conducted the statistical analysis. IBL, BBF, CAD, NAGF and RBC made substantial contribution to the analysis of the data. IBL drafted the manuscript. IBL, AMM, BBF, KPE, CAD, RBC, EZ, NAGF, ØS, WFCB, KSM, AMJ, RAK, PG, DBF, LN, CAP, KBW, SD, LZ, MFI, and MTF substantively revised the manuscript, and approved the submitted version. IBL is the guarantor for the article. The corresponding author attests that all listed authors meet authorship criteria and that no others meeting the criteria have been omitted.

## Funding

This research was funded by the EU Horizon 2020 Grant: Healthy minds 0–100 years: Optimising the use of European brain imaging cohorts (Lifebrain), Grant Agreement No. 732592.

## Competing interest

1  
2 Competing interests: All authors have completed the ICMJE uniform disclosure form at  
3  
4 [www.icmje.org/coi\\_disclosure.pdf](http://www.icmje.org/coi_disclosure.pdf) and declare: no support from any organisation for the submitted  
5  
6 work; no financial relationships with any organisations that might have an interest in the submitted  
7  
8 work in the previous three years [or describe if any]; no other relationships or activities that could  
9  
10 appear to have influenced the submitted work.  
11  
12

13 MTF is the Chief Scientific Officer of the Women's Brain Project and has received personal fees from  
14  
15 Eli Lilly on a project not related to the current paper.  
16  
17  
18  
19  
20  
21

### 22 **Patients consent for publication**

23  
24 Not required  
25  
26  
27  
28  
29

### 30 **Ethics approval**

31  
32  
33 The survey was reviewed by the Regional Committees for Medical and Health Research Ethics in  
34  
35 Norway (2017/653 REK SørØst B) and approved for exemption from ethics approval according to the  
36  
37 Norwegian Health Research Act. In addition, the survey was approved by the University of Oxford  
38  
39 Medical Sciences Interdivisional Research Ethics Committee (R67364/RE001) and the Medical Ethics  
40  
41 Review Committee of VU University Medical Center in the Netherlands as required for dissemination  
42  
43 in the country's research networks. Ethics approval was not required for dissemination in the other  
44  
45 Lifebrain partner countries.  
46  
47  
48  
49  
50  
51

### 52 **Data availability statement**

53  
54  
55 Data will be made available via an open science platform before the Lifebrain project ends.  
56  
57  
58  
59  
60



## Transparency declaration

The corresponding author affirms that this manuscript is an honest, accurate, and transparent account of the study being reported; that no important aspects of the study have been omitted; and that any discrepancies from the study as planned (and, if relevant, registered) have been explained.

## Copyright/license for publication

The corresponding author has the right to grant on behalf of all authors and does grant on behalf of all authors, a worldwide license to the Publishers and its licensees in perpetuity, in all forms, formats and media (whether known now or created in the future), to i) publish, reproduce, distribute, display and store the Contribution, ii) translate the Contribution into other languages, create adaptations, reprints, include within collections and create summaries, extracts and/or, abstracts of the Contribution, iii) create any other derivative work(s) based on the Contribution, iv) to exploit all subsidiary rights in the Contribution, v) the inclusion of electronic links from the Contribution to third party material wherever it may be located; and, vi) license any third party to do any or all of the above.

## REFERENCES

1. Raggi A, Leonardi M. Burden of brain disorders in Europe in 2017 and comparison with other non-communicable disease groups. *J Neurol Neurosurg Psychiatry* 2020;91(1):104-05. doi: 10.1136/jnnp-2019-320466 [published Online First: 2019/06/19]
2. National Institute on Aging U. What is brain health? : National Institute on Aging; 2019 [Available from: <https://brainhealth.nia.nih.gov/> accessed 20 May 2019.
3. Mintzer J, Donovan KA, Kindy AZ, et al. Lifestyle Choices and Brain Health. *Frontiers in Medicine* 2019;6(204) doi: 10.3389/fmed.2019.00204
4. Livingston G, Sommerlad A, Orgeta V, et al. Dementia prevention, intervention, and care. *Lancet* 2017 doi: 10.1016/S0140-6736(17)31363-6
5. Glynn RW, Shelley E, Lawlor BA. Public knowledge and understanding of dementia-evidence from a national survey in Ireland. *Age Ageing* 2017;46(5):865-69. doi: 10.1093/ageing/afx082 [published Online First: 2017/05/23]
6. Rosato M, Leavey G, Cooper J, et al. Factors associated with public knowledge of and attitudes to dementia: A cross-sectional study. *PLoS One* 2019;14(2):e0210543. doi: 10.1371/journal.pone.0210543 [published Online First: 2019/03/01]
7. Heger I, Deckers K, van Boxtel M, et al. Dementia awareness and risk perception in middle-aged and older individuals: baseline results of the MijnBreincoach survey on the association

- 1  
2 between lifestyle and brain health. *BMC Public Health* 2019;19(1):678. doi: 10.1186/s12889-  
3 019-7010-z
- 4 8. Alzheimer's Research UK. Dementia Attitudes Monitor. Wave 1 2018. Shaping breakthroughs in  
5 public understanding of dementia and attitudes to research., 2018.
- 6 9. Durand-Zaleski I, Scott J, Rouillon F, et al. A first national survey of knowledge, attitudes and  
7 behaviours towards schizophrenia, bipolar disorders and autism in France. *BMC Psychiatry*  
8 2012;12:128. doi: 10.1186/1471-244X-12-128 [published Online First: 2012/08/30]
- 9 10. Cadge C, Connor C, Greenfield S. University students' understanding and perceptions of  
10 schizophrenia in the UK: a qualitative study. *BMJ Open* 2019;9(4):e025813. doi:  
11 10.1136/bmjopen-2018-025813 [published Online First: 2019/04/06]
- 12 11. Tomat N, Perovnik M, Vidmar G, et al. Lay Public View of Neuroscience and Science-Based Brain  
13 Health Recommendations in Slovenia. *Frontiers in Public Health* 2021;9(841) doi:  
14 10.3389/fpubh.2021.690421
- 15 12. Niechcial MA, Vaportzis E, Gow AJ. People's views on preserving thinking skills in old age.  
16 *Educational Gerontology* 2019;45(5):341-52. doi: 10.1080/03601277.2019.1627054
- 17 13. Bosco A, Jones KA, Di Lorito C, et al. Changing lifestyle for dementia risk reduction: Inductive  
18 content analysis of a national UK survey. *PLoS One* 2020;15(5):e0233039. doi:  
19 10.1371/journal.pone.0233039 [published Online First: 2020/05/16]
- 20 14. Rosenberg A, Coley N, Soulier A, et al. Experiences of dementia and attitude towards prevention:  
21 a qualitative study among older adults participating in a prevention trial. *BMC Geriatr*  
22 2020;20(1):99. doi: 10.1186/s12877-020-1493-4 [published Online First: 2020/03/14]
- 23 15. Anderson LA, Day KL, Beard RL, et al. The public's perceptions about cognitive health and  
24 Alzheimer's disease among the U.S. population: a national review. *Gerontologist* 2009;49  
25 Suppl 1:S3-11. doi: 10.1093/geront/gnp088
- 26 16. Smith BJ, Ali S, Quach H. Public knowledge and beliefs about dementia risk reduction: a national  
27 survey of Australians. *BMC Public Health* 2014;14:661. doi: 10.1186/1471-2458-14-661
- 28 17. Kim S, Sargent-Cox KA, Anstey KJ. A qualitative study of older and middle-aged adults' perception  
29 and attitudes towards dementia and dementia risk reduction. *J Adv Nurs* 2015;71(7):1694-  
30 703. doi: 10.1111/jan.12641 [published Online First: 2015/02/24]
- 31 18. Barak Y, Gray AR, Rapsey C, et al. The Dunedin dementia risk awareness project: pilot study in  
32 older adults. *Int Psychogeriatr* 2020;32(2):241-54. doi: 10.1017/S1041610219000772  
33 [published Online First: 2019/09/14]
- 34 19. Hosking DE, Sargent-Cox KA, Anstey KJ. An Australian survey of cognitive health beliefs,  
35 intentions, and behaviours through the adult life course. *Prev Med Rep* 2015;2:498-504. doi:  
36 10.1016/j.pmedr.2015.06.008
- 37 20. Friedman DB, Becofsky K, Anderson LA, et al. Public perceptions about risk and protective factors  
38 for cognitive health and impairment: a review of the literature. *Int Psychogeriatr*  
39 2015;27(8):1263-75. doi: 10.1017/S1041610214002877
- 40 21. The Lifebrain Consortium. Lifebrain 2018 [Available from: <http://www.lifebrain.uio.no/>.]
- 41 22. Budin-Ljøsne I, Friedman BB, Suri S, et al. The Global Brain Health Survey: Development of a  
42 Multi-Language Survey of Public Views on Brain Health. *Frontiers in Public Health*  
43 2020;8(387) doi: 10.3389/fpubh.2020.00387
- 44 23. Walhovd KB, Fjell AM, Westerhausen R, et al. Healthy minds from 0-100 years: Optimising the use  
45 of European brain imaging cohorts ("Lifebrain"). *Eur Psychiatry* 2017;47:76-87. doi:  
46 10.1016/j.eurpsy.2017.10.005
- 47 24. Friedman BB, Suri S, Sole-Padullés C, et al. Are People Ready for Personalized Brain Health?  
48 Perspectives of Research Participants in the Lifebrain Consortium. *Gerontologist* 2019 doi:  
49 10.1093/geront/gnz155
- 50 25. Mauguier F, Trejo JL, Andjus P, et al. Ten priorities for national brain and mental health plans.  
51 *Croat Med J* 2019;60(2):152-55.
- 52 26. Baare WFCM, KS; Arnesen, M; Carver, RB; Drevon, CA; Budin-Ljøsne, I Brain researchers want to  
53 know how you take care of your brain 2020 [Available from:  
54  
55  
56  
57  
58  
59  
60

- <https://sciencenordic.com/brain-denmark-researchers-zone/brain-researchers-want-to-know-how-you-take-care-of-your-brain/1621966>.
27. Baare WFCM KA, M; Carver, RB; Drevon, CA; Budin-Ljøsne, I. Hjælp forskerne: Hvordan passer du på din hjerne? : Forskerzonen; 2020 [Available from: <https://videnskab.dk/krop-sundhed/hjaelp-forskerne-hvordan-passer-du-paa-din-hjerne>].
  28. R: A Language and Environment for Statistical Computing [program]: R Foundation for Statistical Computing, 2021.
  29. Altman DG, Royston P. The cost of dichotomising continuous variables. *BMJ* 2006;332(7549):1080. doi: 10.1136/bmj.332.7549.1080
  30. Elm Ev, Altman DG, Egger M, et al. Strengthening the reporting of observational studies in epidemiology (STROBE) statement: guidelines for reporting observational studies. *BMJ* 2007;335(7624):806-08. doi: 10.1136/bmj.39335.541782.AD
  31. Join Dementia Research [Available from: <https://www.joindementiaresearch.nihr.ac.uk/>].
  32. Hersenonderzoek.nl. [Available from: <https://hersenonderzoek.nl/>].
  33. American Society on Aging. ASA-MetLife Foundation Attitudes and Awareness of Brain Health Poll, 2006.
  34. Vaportzis E, Gow AJ. People's Beliefs and Expectations About How Cognitive Skills Change with Age: Evidence From a U.K.-Wide Aging Survey. *Am J Geriatr Psychiatry* 2018;26(7):797-805. doi: 10.1016/j.jagp.2018.03.016 [published Online First: 2018/05/08]
  35. Wilcox S, Sharkey JR, Mathews AE, et al. Perceptions and Beliefs About the Role of Physical Activity and Nutrition on Brain Health in Older Adults. *Gerontologist* 2009;49 doi: 10.1093/geront/gnp078
  36. IPSOS. Attitudes towards the early years, 2021.
  37. Maust DT, Solway E, Langa KM, et al. Perception of Dementia Risk and Preventive Actions Among US Adults Aged 50 to 64 Years. *JAMA Neurol* 2020;77(2):259-62. doi: 10.1001/jamaneurol.2019.3946 [published Online First: 2019/11/16]
  38. Sommerlad A, Ruegger J, Singh-Manoux A, et al. Marriage and risk of dementia: systematic review and meta-analysis of observational studies. *J Neurol Neurosurg Psychiatry* 2018;89(3):231-38. doi: 10.1136/jnnp-2017-316274 [published Online First: 2017/12/01]
  39. Rehm J, Shield KD. Global Burden of Disease and the Impact of Mental and Addictive Disorders. *Curr Psychiatry Rep* 2019;21(2):10. doi: 10.1007/s11920-019-0997-0 [published Online First: 2019/02/08]
  40. Barzilay R, Moore TM, Greenberg DM, et al. Resilience, COVID-19-related stress, anxiety and depression during the pandemic in a large population enriched for healthcare providers. *Translational Psychiatry* 2020;10(1):291. doi: 10.1038/s41398-020-00982-4
  41. Arango C, Diaz-Caneja CM, McGorry PD, et al. Preventive strategies for mental health. *Lancet Psychiatry* 2018;5(7):591-604. doi: 10.1016/S2215-0366(18)30057-9 [published Online First: 2018/05/19]
  42. Mehegan LR, C; Skufca L. 2017 Brain Health and Nutrition Survey. AARP Research 2018 [Available from: <https://doi.org/10.26419/res.00187.001>].
  43. Wu B, Goins RT, Laditka JN, et al. Gender differences in views about cognitive health and healthy lifestyle behaviors among rural older adults. *Gerontologist* 2009;49 Suppl 1:S72-8. doi: 10.1093/geront/gnp077
  44. Gaube S, Lermer E, Fischer P. The Concept of Risk Perception in Health-Related Behavior Theory and Behavior Change. In: Raue M, Streicher B, Lermer E, eds. *Perceived Safety: A Multidisciplinary Perspective*. Cham: Springer International Publishing 2019:101-18.
  45. Ferrer R, Klein WM. Risk perceptions and health behavior. *Curr Opin Psychol* 2015;5:85-89. doi: 10.1016/j.copsyc.2015.03.012 [published Online First: 2015/08/11]
  46. Wahl HW, Hoppmann CA, Ram N, et al. Healthy Aging-Relevant Goals: The Role of Person-Context Co-construction. *J Gerontol B Psychol Sci Soc Sci* 2021;76(Supplement\_2):S181-S90. doi: 10.1093/geronb/gbab089 [published Online First: 2021/09/14]
  47. Farkas L. Data collection in the field of ethnicity. European Commission. Luxembourg: Publications Office of the European Union, 2017.

1  
2 48. Wang Y, Pan Y, Li H. What is brain health and why is it important? *Bmj* 2020;371:m3683. doi:  
3 10.1136/bmj.m3683 [published Online First: 2020/10/11]  
4  
5  
6  
7  
8  
9  
10  
11  
12  
13  
14  
15  
16  
17  
18  
19  
20  
21  
22  
23  
24  
25  
26  
27  
28  
29  
30  
31  
32  
33  
34  
35  
36  
37  
38  
39  
40  
41  
42  
43  
44  
45  
46  
47  
48  
49  
50  
51  
52  
53  
54  
55  
56  
57  
58  
59  
60

For peer review only

1  
2 **Figures (provided in separate files)**  
3

4  
5 **Figure 1. Factors believed to have a strong influence on brain health**  
6

7 *% indicates proportion of participants rating this factor as having a 'strong' or 'very strong' influence*  
8 *on brain health, with the remainder of participants rating it as 'moderate,' 'weak' or 'no influence.'*  
9

10  
11  
12  
13  
14  
15  
16 **Figure 2. Life periods considered important to take care of one's brain**  
17

18 *% indicates proportion of participants rating this life period as 'important' or 'very important,' with*  
19 *the remainder of participants rating it as 'not important' or 'moderately important.'*  
20  
21  
22

23  
24  
25  
26  
27 **Figure 3. Diseases and disorders believed to be associated with the brain**  
28

29 *% indicates proportion of participants rating this disorder or disease as 'associated with the brain,'*  
30 *with the remainder of participants rating it as 'not associated with the brain.'*  
31  
32  
33

34  
35  
36  
37  
38  
39  
40 **Supplementary material (provided in separate files)**  
41

42  
43 Supplementary material 1. Comparison of binary vs continuous outcome models  
44

45  
46 Supplementary material 2. Lifebrain Global Brain Health Survey. Detailed descriptive statistics  
47

48  
49 Supplementary material 3. All model tables  
50

51  
52 Supplementary material 4. Demographic characteristics across countries  
53

54  
55 Supplementary material 5. Lifebrain Global Brain Health Survey. Odd ratios and 99% confidence  
56  
57 intervals across all demographic characteristics  
58  
59  
60



1  
2  
3  
4  
5  
6  
7  
8  
9  
10  
11  
12  
13  
14  
15  
16  
17  
18  
19  
20  
21  
22  
23  
24  
25  
26  
27  
28  
29  
30  
31  
32  
33  
34  
35  
36  
37  
38  
39  
40  
41  
42  
43  
44  
45  
46



1  
2  
3  
4  
5  
6  
7  
8  
9  
10  
11  
12  
13  
14  
15  
16  
17  
18  
19  
20  
21  
22  
23  
24  
25  
26  
27  
28  
29  
30  
31  
32  
33  
34  
35  
36  
37  
38  
39  
40  
41  
42  
43  
44  
45  
46





# Lifebrain Global Brain Health Survey

## Supplementary tables

### Contents

|          |                                                |          |
|----------|------------------------------------------------|----------|
| <b>1</b> | <b>Question 1</b>                              | <b>3</b> |
| 1.1      | Continuous models                              | 3        |
| 1.1.1    | Question 1: continuous - Substance use         | 4        |
| 1.1.2    | Question 1: continuous - Genetics              | 5        |
| 1.1.3    | Question 1: continuous - Physical health       | 6        |
| 1.1.4    | Question 1: continuous - Sleeping habits       | 7        |
| 1.1.5    | Question 1: continuous - Social environment    | 8        |
| 1.1.6    | Question 1: continuous - Life goals            | 9        |
| 1.1.7    | Question 1: continuous - Physical environment  | 10       |
| 1.1.8    | Question 1: continuous - Diet                  | 11       |
| 1.1.9    | Question 1: continuous - Education             | 12       |
| 1.1.10   | Question 1: continuous - Profession            | 13       |
| 1.1.11   | Question 1: continuous - Income                | 14       |
| 1.2      | Binary models                                  | 14       |
| 1.2.1    | Question 1: binary - Substance use             | 15       |
| 1.2.2    | Question 1: binary - Genetics                  | 16       |
| 1.2.3    | Question 1: binary - Physical health           | 17       |
| 1.2.4    | Question 1: binary - Sleeping habits           | 18       |
| 1.2.5    | Question 1: binary - Social environment        | 19       |
| 1.2.6    | Question 1: binary - Life goals                | 20       |
| 1.2.7    | Question 1: binary - Physical environment      | 21       |
| 1.2.8    | Question 1: binary - Diet                      | 22       |
| 1.2.9    | Question 1: binary - Education                 | 23       |
| 1.2.10   | Question 1: binary - Profession                | 24       |
| 1.2.11   | Question 1: binary - Income                    | 25       |
| 1.3      | Ordinal models                                 | 25       |
| 1.3.1    | Question 1: ordinal - Substance use            | 26       |
| 1.3.2    | Question 1: ordinal - Genetics                 | 28       |
| 1.3.3    | Question 1: ordinal - Physical health          | 30       |
| 1.3.4    | Question 1: ordinal - Sleeping habits          | 32       |
| 1.3.5    | Question 1: ordinal - Social environment       | 34       |
| 1.3.6    | Question 1: ordinal - Life goals               | 36       |
| 1.3.7    | Question 1: ordinal - Physical environment     | 38       |
| 1.3.8    | Question 1: ordinal - Diet                     | 40       |
| 1.3.9    | Question 1: ordinal - Education                | 42       |
| 1.3.10   | Question 1: ordinal - Profession               | 44       |
| 1.3.11   | Question 1: ordinal - Income                   | 46       |
| 1.4      | Comparison binary and continuous model results | 47       |
| 1.4.1    | Question 1: bin_vs_cont - Substance use        | 47       |
| 1.4.2    | Question 1: bin_vs_cont - Sleeping habits      | 47       |
| 1.4.3    | Question 1: bin_vs_cont - Life goals           | 47       |
| 1.4.4    | Question 1: bin_vs_cont - Diet                 | 48       |

1  
2  
3  
4  
5  
6  
7  
8  
9  
10  
11  
12  
13  
14  
15  
16  
17  
18  
19  
20  
21  
22  
23  
24  
25  
26  
27  
28  
29  
30  
31  
32  
33  
34  
35  
36  
37  
38  
39  
40  
41  
42  
43  
44  
45  
46  
47  
48  
49  
50  
51  
52  
53  
54  
55  
56  
57  
58  
59  
60

|          |                                                          |           |
|----------|----------------------------------------------------------|-----------|
| 1.4.5    | Question 1: bin_vs_cont - Education . . . . .            | 48        |
| 1.4.6    | Question 1: bin_vs_cont - Income . . . . .               | 48        |
| <b>2</b> | <b>Question 2</b>                                        | <b>49</b> |
| 2.1      | Continuous models . . . . .                              | 49        |
| 2.1.1    | Question 2: continuous - In the womb . . . . .           | 50        |
| 2.1.2    | Question 2: continuous - Childhood . . . . .             | 51        |
| 2.1.3    | Question 2: continuous - Adolescence . . . . .           | 52        |
| 2.1.4    | Question 2: continuous - Young adulthood . . . . .       | 53        |
| 2.1.5    | Question 2: continuous - Middle age . . . . .            | 54        |
| 2.1.6    | Question 2: continuous - Old age . . . . .               | 55        |
| 2.2      | Binary models . . . . .                                  | 55        |
| 2.2.1    | Question 2: binary - In the womb . . . . .               | 56        |
| 2.2.2    | Question 2: binary - Childhood . . . . .                 | 57        |
| 2.2.3    | Question 2: binary - Adolescence . . . . .               | 58        |
| 2.2.4    | Question 2: binary - Young adulthood . . . . .           | 59        |
| 2.2.5    | Question 2: binary - Middle age . . . . .                | 60        |
| 2.2.6    | Question 2: binary - Old age . . . . .                   | 61        |
| 2.3      | Ordinal models . . . . .                                 | 61        |
| 2.3.1    | Question 2: ordinal - In the womb . . . . .              | 62        |
| 2.3.2    | Question 2: ordinal - Childhood . . . . .                | 64        |
| 2.3.3    | Question 2: ordinal - Adolescence . . . . .              | 66        |
| 2.3.4    | Question 2: ordinal - Young adulthood . . . . .          | 68        |
| 2.3.5    | Question 2: ordinal - Middle age . . . . .               | 70        |
| 2.3.6    | Question 2: ordinal - Old age . . . . .                  | 72        |
| 2.4      | Comparison binary and continuous model results . . . . . | 73        |
| 2.4.1    | Question 2: bin_vs_cont - In the womb . . . . .          | 73        |
| 2.4.2    | Question 2: bin_vs_cont - Childhood . . . . .            | 73        |
| 2.4.3    | Question 2: bin_vs_cont - Adolescence . . . . .          | 73        |
| 2.4.4    | Question 2: bin_vs_cont - Young adulthood . . . . .      | 73        |
| <b>3</b> | <b>Question 3</b>                                        | <b>74</b> |
| 3.1      | Binary models . . . . .                                  | 74        |
| 3.1.1    | Question 3: binary - Alzheimer's . . . . .               | 75        |
| 3.1.2    | Question 3: binary - Schizophrenia . . . . .             | 76        |
| 3.1.3    | Question 3: binary - Depression . . . . .                | 77        |
| 3.1.4    | Question 3: binary - Bipolar . . . . .                   | 78        |
| 3.1.5    | Question 3: binary - Anxiety . . . . .                   | 79        |
| 3.1.6    | Question 3: binary - Addiction . . . . .                 | 80        |
| 3.1.7    | Question 3: binary - Stroke . . . . .                    | 81        |
| 3.1.8    | Question 3: binary - Parkinson's . . . . .               | 82        |
| 3.1.9    | Question 3: binary - Migraine . . . . .                  | 83        |
| 3.1.10   | Question 3: binary - Cancer . . . . .                    | 84        |
| 3.1.11   | Question 3: binary - Hypertension . . . . .              | 85        |
| 3.1.12   | Question 3: binary - Diabetes . . . . .                  | 86        |
| 3.1.13   | Question 3: binary - Arthritis . . . . .                 | 87        |

# 1 Question 1

## 1.1 Continuous models

For peer review only

## 1.1.1 Question 1: continuous - Substance use

| fct                          | term              | estimate | std.error | statistic | p.value |
|------------------------------|-------------------|----------|-----------|-----------|---------|
|                              | (Intercept)       | 4.43     | 0.01      | 688.58    | 0.00    |
| age                          | 41-60             | 0.14     | 0.01      | 14.92     | 0.00    |
|                              | <= 40             | 0.12     | 0.01      | 9.92      | 0.00    |
| education                    | (Intercept)       | 4.52     | 0.01      | 854.00    | 0.00    |
|                              | Lower             | -0.06    | 0.01      | -6.44     | 0.00    |
| gender                       | (Intercept)       | 4.54     | 0.01      | 873.16    | 0.00    |
|                              | Man               | -0.11    | 0.01      | -11.15    | 0.00    |
|                              | Other/Undisclosed | -0.18    | 0.06      | -2.83     | 0.00    |
| healthcare_experience        | (Intercept)       | 4.47     | 0.01      | 798.95    | 0.00    |
|                              | Yes               | 0.10     | 0.01      | 10.71     | 0.00    |
| cognitive_health             | (Intercept)       | 4.52     | 0.00      | 998.47    | 0.00    |
|                              | Below average     | -0.18    | 0.02      | -9.81     | 0.00    |
| mental_health                | (Intercept)       | 4.51     | 0.00      | 956.62    | 0.00    |
|                              | Below average     | -0.03    | 0.01      | -2.19     | 0.03    |
| illness_experience           | (Intercept)       | 4.53     | 0.01      | 796.11    | 0.00    |
|                              | Yes               | -0.05    | 0.01      | -5.55     | 0.00    |
| brain_disease_caregiver      | (Intercept)       | 4.50     | 0.01      | 749.35    | 0.00    |
|                              | Yes               | 0.01     | 0.01      | 1.46      | 0.14    |
| brain_research_participation | (Intercept)       | 4.51     | 0.01      | 774.55    | 0.00    |
|                              | Yes               | -0.02    | 0.01      | -2.00     | 0.05    |
| relationship                 | (Intercept)       | 4.50     | 0.01      | 680.52    | 0.00    |
|                              | Stable            | 0.01     | 0.01      | 0.65      | 0.52    |

## 1.1.2 Question 1: continuous - Genetics

| fct                          | term              | estimate | std.error | statistic | p.value |
|------------------------------|-------------------|----------|-----------|-----------|---------|
|                              | (Intercept)       | 4.18     | 0.01      | 601.12    | 0.00    |
| age                          | 41-60             | 0.03     | 0.01      | 2.59      | 0.01    |
|                              | <= 40             | -0.12    | 0.01      | -8.53     | 0.00    |
| education                    | (Intercept)       | 4.18     | 0.01      | 731.49    | 0.00    |
|                              | Lower             | -0.03    | 0.01      | -2.59     | 0.01    |
| gender                       | (Intercept)       | 4.20     | 0.01      | 749.84    | 0.00    |
|                              | Man               | -0.10    | 0.01      | -9.30     | 0.00    |
|                              | Other/Undisclosed | -0.32    | 0.07      | -4.60     | 0.00    |
| healthcare_experience        | (Intercept)       | 4.16     | 0.01      | 688.35    | 0.00    |
|                              | Yes               | 0.04     | 0.01      | 3.85      | 0.00    |
| cognitive_health             | (Intercept)       | 4.18     | 0.00      | 854.95    | 0.00    |
|                              | Below average     | -0.05    | 0.02      | -2.72     | 0.01    |
| mental_health                | (Intercept)       | 4.17     | 0.01      | 820.60    | 0.00    |
|                              | Below average     | 0.02     | 0.01      | 1.09      | 0.27    |
| illness_experience           | (Intercept)       | 4.17     | 0.01      | 679.16    | 0.00    |
|                              | Yes               | 0.02     | 0.01      | 2.07      | 0.04    |
| brain_disease_caregiver      | (Intercept)       | 4.11     | 0.01      | 636.56    | 0.00    |
|                              | Yes               | 0.14     | 0.01      | 15.23     | 0.00    |
| brain_research_participation | (Intercept)       | 4.14     | 0.01      | 659.34    | 0.00    |
|                              | Yes               | 0.08     | 0.01      | 8.22      | 0.00    |
| relationship                 | (Intercept)       | 4.14     | 0.01      | 580.72    | 0.00    |
|                              | Stable            | 0.06     | 0.01      | 6.27      | 0.00    |

## 1.1.3 Question 1: continuous - Physical health

| fct                          | term              | estimate | std.error | statistic | p.value |
|------------------------------|-------------------|----------|-----------|-----------|---------|
|                              | (Intercept)       | 4.18     | 0.01      | 666.63    | 0.00    |
| age                          | 41-60             | 0.07     | 0.01      | 7.65      | 0.00    |
|                              | <= 40             | 0.09     | 0.01      | 7.70      | 0.00    |
| education                    | (Intercept)       | 4.26     | 0.01      | 829.57    | 0.00    |
|                              | Lower             | -0.12    | 0.01      | -12.71    | 0.00    |
| gender                       | (Intercept)       | 4.24     | 0.01      | 839.39    | 0.00    |
|                              | Man               | -0.07    | 0.01      | -7.47     | 0.00    |
|                              | Other/Undisclosed | -0.01    | 0.06      | -0.21     | 0.83    |
| healthcare_experience        | (Intercept)       | 4.17     | 0.01      | 769.63    | 0.00    |
|                              | Yes               | 0.12     | 0.01      | 14.06     | 0.00    |
| cognitive_health             | (Intercept)       | 4.23     | 0.00      | 962.91    | 0.00    |
|                              | Below average     | -0.16    | 0.02      | -8.83     | 0.00    |
| mental_health                | (Intercept)       | 4.23     | 0.00      | 924.48    | 0.00    |
|                              | Below average     | -0.07    | 0.01      | -5.46     | 0.00    |
| illness_experience           | (Intercept)       | 4.24     | 0.01      | 768.61    | 0.00    |
|                              | Yes               | -0.05    | 0.01      | -6.01     | 0.00    |
| brain_disease_caregiver      | (Intercept)       | 4.20     | 0.01      | 720.63    | 0.00    |
|                              | Yes               | 0.04     | 0.01      | 4.98      | 0.00    |
| brain_research_participation | (Intercept)       | 4.21     | 0.01      | 744.16    | 0.00    |
|                              | Yes               | 0.02     | 0.01      | 2.45      | 0.01    |
| relationship                 | (Intercept)       | 4.22     | 0.01      | 656.77    | 0.00    |
|                              | Stable            | 0.01     | 0.01      | 0.66      | 0.51    |

## 1.1.4 Question 1: continuous - Sleeping habits

| fct                          | term              | estimate | std.error | statistic | p.value |
|------------------------------|-------------------|----------|-----------|-----------|---------|
|                              | (Intercept)       | 4.02     | 0.01      | 633.20    | 0.00    |
| age                          | 41-60             | 0.28     | 0.01      | 29.04     | 0.00    |
|                              | <= 40             | 0.41     | 0.01      | 32.90     | 0.00    |
| education                    | (Intercept)       | 4.21     | 0.01      | 789.13    | 0.00    |
|                              | Lower             | -0.07    | 0.01      | -7.00     | 0.00    |
| gender                       | (Intercept)       | 4.23     | 0.01      | 808.10    | 0.00    |
|                              | Man               | -0.13    | 0.01      | -13.02    | 0.00    |
|                              | Other/Undisclosed | 0.04     | 0.07      | 0.65      | 0.51    |
| healthcare_experience        | (Intercept)       | 4.15     | 0.01      | 736.57    | 0.00    |
|                              | Yes               | 0.11     | 0.01      | 11.72     | 0.00    |
| cognitive_health             | (Intercept)       | 4.19     | 0.00      | 917.63    | 0.00    |
|                              | Below average     | 0.02     | 0.02      | 1.28      | 0.20    |
| mental_health                | (Intercept)       | 4.17     | 0.00      | 880.30    | 0.00    |
|                              | Below average     | 0.12     | 0.01      | 9.03      | 0.00    |
| illness_experience           | (Intercept)       | 4.17     | 0.01      | 728.84    | 0.00    |
|                              | Yes               | 0.04     | 0.01      | 3.95      | 0.00    |
| brain_disease_caregiver      | (Intercept)       | 4.20     | 0.01      | 695.18    | 0.00    |
|                              | Yes               | -0.03    | 0.01      | -3.77     | 0.00    |
| brain_research_participation | (Intercept)       | 4.24     | 0.01      | 724.78    | 0.00    |
|                              | Yes               | -0.12    | 0.01      | -13.42    | 0.00    |
| relationship                 | (Intercept)       | 4.24     | 0.01      | 638.23    | 0.00    |
|                              | Stable            | -0.10    | 0.01      | -10.98    | 0.00    |

## 1.1.5 Question 1: continuous - Social environment

| fct                          | term              | estimate | std.error | statistic | p.value |
|------------------------------|-------------------|----------|-----------|-----------|---------|
|                              | (Intercept)       | 4.06     | 0.01      | 602.76    | 0.00    |
| age                          | 41-60             | 0.13     | 0.01      | 12.66     | 0.00    |
|                              | <= 40             | 0.26     | 0.01      | 20.07     | 0.00    |
| education                    | (Intercept)       | 4.17     | 0.01      | 749.41    | 0.00    |
|                              | Lower             | -0.06    | 0.01      | -6.20     | 0.00    |
| gender                       | (Intercept)       | 4.18     | 0.01      | 766.26    | 0.00    |
|                              | Man               | -0.11    | 0.01      | -10.85    | 0.00    |
|                              | Other/Undisclosed | 0.17     | 0.07      | 2.52      | 0.01    |
| healthcare_experience        | (Intercept)       | 4.10     | 0.01      | 698.87    | 0.00    |
|                              | Yes               | 0.14     | 0.01      | 14.45     | 0.00    |
| cognitive_health             | (Intercept)       | 4.16     | 0.00      | 874.55    | 0.00    |
|                              | Below average     | -0.13    | 0.02      | -6.66     | 0.00    |
| mental_health                | (Intercept)       | 4.14     | 0.00      | 837.48    | 0.00    |
|                              | Below average     | 0.04     | 0.01      | 2.84      | 0.00    |
| illness_experience           | (Intercept)       | 4.16     | 0.01      | 696.08    | 0.00    |
|                              | Yes               | -0.02    | 0.01      | -1.82     | 0.07    |
| brain_disease_caregiver      | (Intercept)       | 4.14     | 0.01      | 657.26    | 0.00    |
|                              | Yes               | 0.01     | 0.01      | 1.16      | 0.25    |
| brain_research_participation | (Intercept)       | 4.17     | 0.01      | 680.99    | 0.00    |
|                              | Yes               | -0.04    | 0.01      | -4.30     | 0.00    |
| relationship                 | (Intercept)       | 4.17     | 0.01      | 601.43    | 0.00    |
|                              | Stable            | -0.05    | 0.01      | -4.97     | 0.00    |



## 1.1.6 Question 1: continuous - Life goals

| fct                          | term              | estimate | std.error | statistic | p.value |
|------------------------------|-------------------|----------|-----------|-----------|---------|
|                              | (Intercept)       | 3.94     | 0.01      | 517.96    | 0.00    |
| age                          | 41-60             | 0.01     | 0.01      | 0.49      | 0.62    |
|                              | <= 40             | -0.09    | 0.01      | -6.00     | 0.00    |
| education                    | (Intercept)       | 3.94     | 0.01      | 630.76    | 0.00    |
|                              | Lower             | -0.04    | 0.01      | -3.25     | 0.00    |
| gender                       | (Intercept)       | 3.95     | 0.01      | 643.86    | 0.00    |
|                              | Man               | -0.07    | 0.01      | -6.14     | 0.00    |
|                              | Other/Undisclosed | -0.01    | 0.08      | -0.17     | 0.87    |
| healthcare_experience        | (Intercept)       | 3.89     | 0.01      | 589.36    | 0.00    |
|                              | Yes               | 0.11     | 0.01      | 10.78     | 0.00    |
| cognitive_health             | (Intercept)       | 3.93     | 0.01      | 736.61    | 0.00    |
|                              | Below average     | -0.06    | 0.02      | -2.79     | 0.01    |
| mental_health                | (Intercept)       | 3.94     | 0.01      | 709.13    | 0.00    |
|                              | Below average     | -0.07    | 0.02      | -4.39     | 0.00    |
| illness_experience           | (Intercept)       | 3.93     | 0.01      | 585.48    | 0.00    |
|                              | Yes               | 0.01     | 0.01      | 0.93      | 0.35    |
| brain_disease_caregiver      | (Intercept)       | 3.94     | 0.01      | 556.22    | 0.00    |
|                              | Yes               | -0.02    | 0.01      | -1.62     | 0.10    |
| brain_research_participation | (Intercept)       | 3.96     | 0.01      | 576.30    | 0.00    |
|                              | Yes               | -0.06    | 0.01      | -6.14     | 0.00    |
| relationship                 | (Intercept)       | 3.94     | 0.01      | 504.61    | 0.00    |
|                              | Stable            | -0.01    | 0.01      | -0.93     | 0.35    |

## 1.1.7 Question 1: continuous - Physical environment

| fct                          | term              | estimate | std.error | statistic | p.value |
|------------------------------|-------------------|----------|-----------|-----------|---------|
|                              | (Intercept)       | 3.88     | 0.01      | 532.98    | 0.00    |
| age                          | 41-60             | 0.09     | 0.01      | 8.67      | 0.00    |
|                              | <= 40             | 0.06     | 0.01      | 4.14      | 0.00    |
| education                    | (Intercept)       | 3.92     | 0.01      | 656.04    | 0.00    |
|                              | Lower             | 0.02     | 0.01      | 1.57      | 0.12    |
| gender                       | (Intercept)       | 3.95     | 0.01      | 672.96    | 0.00    |
|                              | Man               | -0.08    | 0.01      | -6.99     | 0.00    |
|                              | Other/Undisclosed | 0.10     | 0.07      | 1.43      | 0.15    |
| healthcare_experience        | (Intercept)       | 3.90     | 0.01      | 617.01    | 0.00    |
|                              | Yes               | 0.08     | 0.01      | 8.19      | 0.00    |
| cognitive_health             | (Intercept)       | 3.94     | 0.01      | 770.14    | 0.00    |
|                              | Below average     | -0.10    | 0.02      | -4.90     | 0.00    |
| mental_health                | (Intercept)       | 3.93     | 0.01      | 739.62    | 0.00    |
|                              | Below average     | -0.03    | 0.01      | -2.28     | 0.02    |
| illness_experience           | (Intercept)       | 3.91     | 0.01      | 609.36    | 0.00    |
|                              | Yes               | 0.05     | 0.01      | 5.38      | 0.00    |
| brain_disease_caregiver      | (Intercept)       | 3.92     | 0.01      | 578.50    | 0.00    |
|                              | Yes               | 0.02     | 0.01      | 1.72      | 0.09    |
| brain_research_participation | (Intercept)       | 3.93     | 0.01      | 596.77    | 0.00    |
|                              | Yes               | 0.01     | 0.01      | 0.81      | 0.42    |
| relationship                 | (Intercept)       | 3.95     | 0.01      | 529.19    | 0.00    |
|                              | Stable            | -0.04    | 0.01      | -3.64     | 0.00    |

## 1.1.8 Question 1: continuous - Diet

| fct                          | term              | estimate | std.error | statistic | p.value |
|------------------------------|-------------------|----------|-----------|-----------|---------|
|                              | (Intercept)       | 3.79     | 0.01      | 519.59    | 0.00    |
| age                          | 41-60             | 0.19     | 0.01      | 17.83     | 0.00    |
|                              | <= 40             | 0.24     | 0.01      | 16.58     | 0.00    |
| education                    | (Intercept)       | 3.93     | 0.01      | 655.35    | 0.00    |
|                              | Lower             | -0.12    | 0.01      | -11.01    | 0.00    |
| gender                       | (Intercept)       | 3.94     | 0.01      | 667.95    | 0.00    |
|                              | Man               | -0.14    | 0.01      | -12.65    | 0.00    |
|                              | Other/Undisclosed | 0.05     | 0.07      | 0.65      | 0.51    |
| healthcare_experience        | (Intercept)       | 3.84     | 0.01      | 606.08    | 0.00    |
|                              | Yes               | 0.14     | 0.01      | 14.09     | 0.00    |
| cognitive_health             | (Intercept)       | 3.91     | 0.01      | 761.01    | 0.00    |
|                              | Below average     | -0.18    | 0.02      | -8.69     | 0.00    |
| mental_health                | (Intercept)       | 3.91     | 0.01      | 730.87    | 0.00    |
|                              | Below average     | -0.09    | 0.01      | -5.98     | 0.00    |
| illness_experience           | (Intercept)       | 3.92     | 0.01      | 606.91    | 0.00    |
|                              | Yes               | -0.05    | 0.01      | -4.56     | 0.00    |
| brain_disease_caregiver      | (Intercept)       | 3.86     | 0.01      | 567.08    | 0.00    |
|                              | Yes               | 0.07     | 0.01      | 7.35      | 0.00    |
| brain_research_participation | (Intercept)       | 3.89     | 0.01      | 587.86    | 0.00    |
|                              | Yes               | 0.02     | 0.01      | 2.02      | 0.04    |
| relationship                 | (Intercept)       | 3.91     | 0.01      | 521.37    | 0.00    |
|                              | Stable            | -0.03    | 0.01      | -2.66     | 0.01    |

## 1.1.9 Question 1: continuous - Education

| fct                          | term              | estimate | std.error | statistic | p.value |
|------------------------------|-------------------|----------|-----------|-----------|---------|
|                              | (Intercept)       | 3.67     | 0.01      | 464.29    | 0.00    |
| age                          | 41-60             | -0.02    | 0.01      | -1.55     | 0.12    |
|                              | <= 40             | 0.11     | 0.02      | 6.88      | 0.00    |
| education                    | (Intercept)       | 3.76     | 0.01      | 582.87    | 0.00    |
|                              | Lower             | -0.23    | 0.01      | -20.40    | 0.00    |
| gender                       | (Intercept)       | 3.68     | 0.01      | 576.03    | 0.00    |
|                              | Man               | 0.03     | 0.01      | 2.60      | 0.01    |
|                              | Other/Undisclosed | 0.03     | 0.08      | 0.32      | 0.75    |
| healthcare_experience        | (Intercept)       | 3.63     | 0.01      | 529.68    | 0.00    |
|                              | Yes               | 0.15     | 0.01      | 13.63     | 0.00    |
| cognitive_health             | (Intercept)       | 3.70     | 0.01      | 667.00    | 0.00    |
|                              | Below average     | -0.22    | 0.02      | -9.50     | 0.00    |
| mental_health                | (Intercept)       | 3.70     | 0.01      | 642.33    | 0.00    |
|                              | Below average     | -0.15    | 0.02      | -9.54     | 0.00    |
| illness_experience           | (Intercept)       | 3.71     | 0.01      | 531.94    | 0.00    |
|                              | Yes               | -0.05    | 0.01      | -4.79     | 0.00    |
| brain_disease_caregiver      | (Intercept)       | 3.70     | 0.01      | 503.48    | 0.00    |
|                              | Yes               | -0.04    | 0.01      | -3.97     | 0.00    |
| brain_research_participation | (Intercept)       | 3.69     | 0.01      | 516.62    | 0.00    |
|                              | Yes               | -0.01    | 0.01      | -1.08     | 0.28    |
| relationship                 | (Intercept)       | 3.69     | 0.01      | 454.60    | 0.00    |
|                              | Stable            | 0.00     | 0.01      | -0.14     | 0.89    |

## 1.1.10 Question 1: continuous - Profession

| fct                          | term              | estimate | std.error | statistic | p.value |
|------------------------------|-------------------|----------|-----------|-----------|---------|
|                              | (Intercept)       | 3.51     | 0.01      | 451.81    | 0.00    |
| age                          | 41-60             | 0.09     | 0.01      | 7.52      | 0.00    |
|                              | <= 40             | 0.19     | 0.02      | 12.39     | 0.00    |
| education                    | (Intercept)       | 3.62     | 0.01      | 568.60    | 0.00    |
|                              | Lower             | -0.15    | 0.01      | -13.31    | 0.00    |
| gender                       | (Intercept)       | 3.56     | 0.01      | 567.36    | 0.00    |
|                              | Man               | 0.05     | 0.01      | 4.27      | 0.00    |
|                              | Other/Undisclosed | -0.01    | 0.08      | -0.12     | 0.90    |
| healthcare_experience        | (Intercept)       | 3.53     | 0.01      | 523.68    | 0.00    |
|                              | Yes               | 0.11     | 0.01      | 10.03     | 0.00    |
| cognitive_health             | (Intercept)       | 3.58     | 0.01      | 656.35    | 0.00    |
|                              | Below average     | -0.14    | 0.02      | -6.08     | 0.00    |
| mental_health                | (Intercept)       | 3.58     | 0.01      | 630.27    | 0.00    |
|                              | Below average     | -0.05    | 0.02      | -3.07     | 0.00    |
| illness_experience           | (Intercept)       | 3.59     | 0.01      | 523.05    | 0.00    |
|                              | Yes               | -0.03    | 0.01      | -2.52     | 0.01    |
| brain_disease_caregiver      | (Intercept)       | 3.61     | 0.01      | 498.23    | 0.00    |
|                              | Yes               | -0.07    | 0.01      | -6.30     | 0.00    |
| brain_research_participation | (Intercept)       | 3.60     | 0.01      | 513.26    | 0.00    |
|                              | Yes               | -0.07    | 0.01      | -6.48     | 0.00    |
| relationship                 | (Intercept)       | 3.59     | 0.01      | 450.03    | 0.00    |
|                              | Stable            | -0.03    | 0.01      | -2.38     | 0.02    |

## 1.1.11 Question 1: continuous - Income

| fct                          | term              | estimate | std.error | statistic | p.value |
|------------------------------|-------------------|----------|-----------|-----------|---------|
|                              | (Intercept)       | 3.21     | 0.01      | 398.85    | 0.00    |
| age                          | 41-60             | -0.02    | 0.01      | -1.34     | 0.18    |
|                              | <= 40             | -0.13    | 0.02      | -8.24     | 0.00    |
| education                    | (Intercept)       | 3.17     | 0.01      | 480.09    | 0.00    |
|                              | Lower             | 0.03     | 0.01      | 2.85      | 0.00    |
| gender                       | (Intercept)       | 3.20     | 0.01      | 493.23    | 0.00    |
|                              | Man               | -0.06    | 0.01      | -5.03     | 0.00    |
|                              | Other/Undisclosed | 0.10     | 0.08      | 1.21      | 0.23    |
| healthcare_experience        | (Intercept)       | 3.13     | 0.01      | 449.09    | 0.00    |
|                              | Yes               | 0.14     | 0.01      | 12.62     | 0.00    |
| cognitive_health             | (Intercept)       | 3.19     | 0.01      | 564.26    | 0.00    |
|                              | Below average     | -0.06    | 0.02      | -2.64     | 0.01    |
| mental_health                | (Intercept)       | 3.19     | 0.01      | 542.31    | 0.00    |
|                              | Below average     | -0.03    | 0.02      | -1.74     | 0.08    |
| illness_experience           | (Intercept)       | 3.16     | 0.01      | 446.13    | 0.00    |
|                              | Yes               | 0.06     | 0.01      | 4.95      | 0.00    |
| brain_disease_caregiver      | (Intercept)       | 3.18     | 0.01      | 424.25    | 0.00    |
|                              | Yes               | 0.02     | 0.01      | 1.46      | 0.14    |
| brain_research_participation | (Intercept)       | 3.17     | 0.01      | 436.64    | 0.00    |
|                              | Yes               | 0.02     | 0.01      | 2.12      | 0.03    |
| relationship                 | (Intercept)       | 3.18     | 0.01      | 385.82    | 0.00    |
|                              | Stable            | 0.00     | 0.01      | 0.09      | 0.93    |

## 1.2 Binary models

## 1.2.1 Question 1: binary - Substance use

| fct                          | term              | estimate | std.error | statistic | p.value |
|------------------------------|-------------------|----------|-----------|-----------|---------|
|                              | (Intercept)       | 2.26     | 0.03      | 74.47     | 0.00    |
| age                          | 41-60             | 0.53     | 0.05      | 10.25     | 0.00    |
|                              | <= 40             | 0.36     | 0.07      | 5.35      | 0.00    |
| education                    | (Intercept)       | 2.59     | 0.03      | 90.65     | 0.00    |
|                              | Lower             | -0.28    | 0.05      | -6.03     | 0.00    |
| gender                       | (Intercept)       | 2.63     | 0.03      | 92.09     | 0.00    |
|                              | Man               | -0.42    | 0.05      | -8.88     | 0.00    |
|                              | Other/Undisclosed | -0.83    | 0.26      | -3.24     | 0.00    |
| healthcare_experience        | (Intercept)       | 2.35     | 0.03      | 86.09     | 0.00    |
|                              | Yes               | 0.41     | 0.05      | 8.25      | 0.00    |
| cognitive_health             | (Intercept)       | 2.54     | 0.02      | 106.27    | 0.00    |
|                              | Below average     | -0.63    | 0.08      | -8.13     | 0.00    |
| mental_health                | (Intercept)       | 2.51     | 0.02      | 102.24    | 0.00    |
|                              | Below average     | -0.13    | 0.06      | -1.95     | 0.05    |
| illness_experience           | (Intercept)       | 2.58     | 0.03      | 84.53     | 0.00    |
|                              | Yes               | -0.21    | 0.05      | -4.59     | 0.00    |
| brain_disease_caregiver      | (Intercept)       | 2.44     | 0.03      | 80.36     | 0.00    |
|                              | Yes               | 0.12     | 0.05      | 2.66      | 0.01    |
| brain_research_participation | (Intercept)       | 2.49     | 0.03      | 82.75     | 0.00    |
|                              | Yes               | 0.00     | 0.05      | 0.09      | 0.93    |
| relationship                 | (Intercept)       | 2.45     | 0.03      | 72.93     | 0.00    |
|                              | Stable            | 0.08     | 0.05      | 1.78      | 0.08    |

## 1.2.2 Question 1: binary - Genetics

| fct                          | term              | estimate | std.error | statistic | p.value |
|------------------------------|-------------------|----------|-----------|-----------|---------|
|                              | (Intercept)       | 1.62     | 0.02      | 67.72     | 0.00    |
| age                          | 41-60             | 0.01     | 0.04      | 0.27      | 0.79    |
|                              | <= 40             | -0.43    | 0.04      | -10.19    | 0.00    |
| education                    | (Intercept)       | 1.56     | 0.02      | 81.15     | 0.00    |
|                              | Lower             | -0.06    | 0.03      | -1.67     | 0.09    |
| gender                       | (Intercept)       | 1.61     | 0.02      | 84.01     | 0.00    |
|                              | Man               | -0.23    | 0.03      | -6.74     | 0.00    |
|                              | Other/Undisclosed | -0.77    | 0.20      | -3.97     | 0.00    |
| healthcare_experience        | (Intercept)       | 1.50     | 0.02      | 75.21     | 0.00    |
|                              | Yes               | 0.12     | 0.03      | 3.52      | 0.00    |
| cognitive_health             | (Intercept)       | 1.55     | 0.02      | 94.77     | 0.00    |
|                              | Below average     | -0.19    | 0.06      | -2.94     | 0.00    |
| mental_health                | (Intercept)       | 1.54     | 0.02      | 90.69     | 0.00    |
|                              | Below average     | 0.01     | 0.05      | 0.27      | 0.79    |
| illness_experience           | (Intercept)       | 1.52     | 0.02      | 74.65     | 0.00    |
|                              | Yes               | 0.06     | 0.03      | 1.74      | 0.08    |
| brain_disease_caregiver      | (Intercept)       | 1.37     | 0.02      | 66.76     | 0.00    |
|                              | Yes               | 0.39     | 0.03      | 12.18     | 0.00    |
| brain_research_participation | (Intercept)       | 1.45     | 0.02      | 71.10     | 0.00    |
|                              | Yes               | 0.22     | 0.03      | 6.69      | 0.00    |
| relationship                 | (Intercept)       | 1.44     | 0.02      | 62.39     | 0.00    |
|                              | Stable            | 0.18     | 0.03      | 5.83      | 0.00    |



## 1.2.3 Question 1: binary - Physical health

| fct                          | term              | estimate | std.error | statistic | p.value |
|------------------------------|-------------------|----------|-----------|-----------|---------|
|                              | (Intercept)       | 1.87     | 0.03      | 71.58     | 0.00    |
| age                          | 41-60             | 0.13     | 0.04      | 3.28      | 0.00    |
|                              | <= 40             | 0.16     | 0.05      | 2.97      | 0.00    |
| education                    | (Intercept)       | 2.05     | 0.02      | 89.45     | 0.00    |
|                              | Lower             | -0.31    | 0.04      | -8.30     | 0.00    |
| gender                       | (Intercept)       | 2.02     | 0.02      | 90.79     | 0.00    |
|                              | Man               | -0.26    | 0.04      | -6.75     | 0.00    |
|                              | Other/Undisclosed | -0.29    | 0.25      | -1.14     | 0.25    |
| healthcare_experience        | (Intercept)       | 1.79     | 0.02      | 81.42     | 0.00    |
|                              | Yes               | 0.43     | 0.04      | 10.86     | 0.00    |
| cognitive_health             | (Intercept)       | 1.98     | 0.02      | 103.89    | 0.00    |
|                              | Below average     | -0.58    | 0.06      | -8.95     | 0.00    |
| mental_health                | (Intercept)       | 1.98     | 0.02      | 99.84     | 0.00    |
|                              | Below average     | -0.29    | 0.05      | -5.84     | 0.00    |
| illness_experience           | (Intercept)       | 2.02     | 0.02      | 83.15     | 0.00    |
|                              | Yes               | -0.19    | 0.04      | -5.27     | 0.00    |
| brain_disease_caregiver      | (Intercept)       | 1.90     | 0.02      | 77.40     | 0.00    |
|                              | Yes               | 0.10     | 0.04      | 2.75      | 0.01    |
| brain_research_participation | (Intercept)       | 1.92     | 0.02      | 80.03     | 0.00    |
|                              | Yes               | 0.05     | 0.04      | 1.46      | 0.14    |
| relationship                 | (Intercept)       | 1.90     | 0.03      | 70.39     | 0.00    |
|                              | Stable            | 0.07     | 0.04      | 1.84      | 0.07    |

## 1.2.4 Question 1: binary - Sleeping habits

| fct                          | term              | estimate | std.error | statistic | p.value |
|------------------------------|-------------------|----------|-----------|-----------|---------|
|                              | (Intercept)       | 1.36     | 0.02      | 61.79     | 0.00    |
| age                          | 41-60             | 0.72     | 0.04      | 18.89     | 0.00    |
|                              | <= 40             | 1.02     | 0.06      | 17.61     | 0.00    |
| education                    | (Intercept)       | 1.80     | 0.02      | 86.24     | 0.00    |
|                              | Lower             | -0.18    | 0.04      | -5.11     | 0.00    |
| gender                       | (Intercept)       | 1.86     | 0.02      | 88.80     | 0.00    |
|                              | Man               | -0.39    | 0.04      | -10.87    | 0.00    |
|                              | Other/Undisclosed | 0.08     | 0.27      | 0.29      | 0.78    |
| healthcare_experience        | (Intercept)       | 1.63     | 0.02      | 78.39     | 0.00    |
|                              | Yes               | 0.30     | 0.04      | 8.36      | 0.00    |
| cognitive_health             | (Intercept)       | 1.74     | 0.02      | 99.75     | 0.00    |
|                              | Below average     | -0.08    | 0.07      | -1.21     | 0.23    |
| mental_health                | (Intercept)       | 1.70     | 0.02      | 95.01     | 0.00    |
|                              | Below average     | 0.29     | 0.05      | 5.28      | 0.00    |
| illness_experience           | (Intercept)       | 1.69     | 0.02      | 78.50     | 0.00    |
|                              | Yes               | 0.12     | 0.03      | 3.39      | 0.00    |
| brain_disease_caregiver      | (Intercept)       | 1.77     | 0.02      | 75.60     | 0.00    |
|                              | Yes               | -0.06    | 0.03      | -1.68     | 0.09    |
| brain_research_participation | (Intercept)       | 1.90     | 0.02      | 79.81     | 0.00    |
|                              | Yes               | -0.34    | 0.03      | -10.04    | 0.00    |
| relationship                 | (Intercept)       | 1.86     | 0.03      | 69.87     | 0.00    |
|                              | Stable            | -0.21    | 0.03      | -6.01     | 0.00    |

## 1.2.5 Question 1: binary - Social environment

| fct                          | term              | estimate | std.error | statistic | p.value |
|------------------------------|-------------------|----------|-----------|-----------|---------|
|                              | (Intercept)       | 1.38     | 0.02      | 62.38     | 0.00    |
| age                          | 41-60             | 0.29     | 0.03      | 8.18      | 0.00    |
|                              | <= 40             | 0.55     | 0.05      | 10.93     | 0.00    |
| education                    | (Intercept)       | 1.63     | 0.02      | 82.78     | 0.00    |
|                              | Lower             | -0.18    | 0.03      | -5.46     | 0.00    |
| gender                       | (Intercept)       | 1.66     | 0.02      | 85.12     | 0.00    |
|                              | Man               | -0.32    | 0.03      | -9.48     | 0.00    |
|                              | Other/Undisclosed | 0.58     | 0.30      | 1.91      | 0.06    |
| healthcare_experience        | (Intercept)       | 1.43     | 0.02      | 73.23     | 0.00    |
|                              | Yes               | 0.39     | 0.03      | 11.55     | 0.00    |
| cognitive_health             | (Intercept)       | 1.59     | 0.02      | 95.96     | 0.00    |
|                              | Below average     | -0.41    | 0.06      | -6.76     | 0.00    |
| mental_health                | (Intercept)       | 1.56     | 0.02      | 91.36     | 0.00    |
|                              | Below average     | 0.03     | 0.05      | 0.62      | 0.53    |
| illness_experience           | (Intercept)       | 1.59     | 0.02      | 76.29     | 0.00    |
|                              | Yes               | -0.05    | 0.03      | -1.55     | 0.12    |
| brain_disease_caregiver      | (Intercept)       | 1.55     | 0.02      | 71.32     | 0.00    |
|                              | Yes               | 0.04     | 0.03      | 1.41      | 0.16    |
| brain_research_participation | (Intercept)       | 1.60     | 0.02      | 74.70     | 0.00    |
|                              | Yes               | -0.07    | 0.03      | -2.32     | 0.02    |
| relationship                 | (Intercept)       | 1.58     | 0.02      | 65.50     | 0.00    |
|                              | Stable            | -0.03    | 0.03      | -0.86     | 0.39    |

## 1.2.6 Question 1: binary - Life goals

| fct                          | term              | estimate | std.error | statistic | p.value |
|------------------------------|-------------------|----------|-----------|-----------|---------|
|                              | (Intercept)       | 1.06     | 0.02      | 52.30     | 0.00    |
| age                          | 41-60             | -0.05    | 0.03      | -1.73     | 0.08    |
|                              | <= 40             | -0.34    | 0.04      | -9.10     | 0.00    |
| education                    | (Intercept)       | 1.00     | 0.02      | 61.07     | 0.00    |
|                              | Lower             | -0.06    | 0.03      | -2.21     | 0.03    |
| gender                       | (Intercept)       | 1.02     | 0.02      | 62.87     | 0.00    |
|                              | Man               | -0.12    | 0.03      | -4.00     | 0.00    |
|                              | Other/Undisclosed | -0.13    | 0.20      | -0.66     | 0.51    |
| healthcare_experience        | (Intercept)       | 0.89     | 0.02      | 52.63     | 0.00    |
|                              | Yes               | 0.24     | 0.03      | 8.66      | 0.00    |
| cognitive_health             | (Intercept)       | 0.99     | 0.01      | 70.68     | 0.00    |
|                              | Below average     | -0.10    | 0.06      | -1.75     | 0.08    |
| mental_health                | (Intercept)       | 1.01     | 0.01      | 69.23     | 0.00    |
|                              | Below average     | -0.22    | 0.04      | -5.74     | 0.00    |
| illness_experience           | (Intercept)       | 0.97     | 0.02      | 55.48     | 0.00    |
|                              | Yes               | 0.03     | 0.03      | 1.12      | 0.26    |
| brain_disease_caregiver      | (Intercept)       | 1.00     | 0.02      | 53.83     | 0.00    |
|                              | Yes               | -0.04    | 0.03      | -1.44     | 0.15    |
| brain_research_participation | (Intercept)       | 1.05     | 0.02      | 57.29     | 0.00    |
|                              | Yes               | -0.14    | 0.03      | -5.19     | 0.00    |
| relationship                 | (Intercept)       | 0.98     | 0.02      | 47.91     | 0.00    |
|                              | Stable            | 0.01     | 0.03      | 0.45      | 0.65    |

## 1.2.7 Question 1: binary - Physical environment

| fct                          | term              | estimate | std.error | statistic | p.value |
|------------------------------|-------------------|----------|-----------|-----------|---------|
|                              | (Intercept)       | 0.84     | 0.02      | 43.31     | 0.00    |
| age                          | 41-60             | 0.23     | 0.03      | 7.59      | 0.00    |
|                              | <= 40             | 0.09     | 0.04      | 2.42      | 0.02    |
| education                    | (Intercept)       | 0.92     | 0.02      | 56.95     | 0.00    |
|                              | Lower             | 0.06     | 0.03      | 1.90      | 0.06    |
| gender                       | (Intercept)       | 0.98     | 0.02      | 60.95     | 0.00    |
|                              | Man               | -0.15    | 0.03      | -5.16     | 0.00    |
|                              | Other/Undisclosed | 0.27     | 0.21      | 1.27      | 0.20    |
| healthcare_experience        | (Intercept)       | 0.87     | 0.02      | 51.54     | 0.00    |
|                              | Yes               | 0.17     | 0.03      | 6.27      | 0.00    |
| cognitive_health             | (Intercept)       | 0.95     | 0.01      | 68.45     | 0.00    |
|                              | Below average     | -0.23    | 0.05      | -4.22     | 0.00    |
| mental_health                | (Intercept)       | 0.95     | 0.01      | 65.66     | 0.00    |
|                              | Below average     | -0.09    | 0.04      | -2.29     | 0.02    |
| illness_experience           | (Intercept)       | 0.88     | 0.02      | 51.40     | 0.00    |
|                              | Yes               | 0.13     | 0.03      | 4.88      | 0.00    |
| brain_disease_caregiver      | (Intercept)       | 0.92     | 0.02      | 50.32     | 0.00    |
|                              | Yes               | 0.03     | 0.03      | 1.25      | 0.21    |
| brain_research_participation | (Intercept)       | 0.93     | 0.02      | 52.21     | 0.00    |
|                              | Yes               | 0.02     | 0.03      | 0.65      | 0.52    |
| relationship                 | (Intercept)       | 0.97     | 0.02      | 47.76     | 0.00    |
|                              | Stable            | -0.07    | 0.03      | -2.46     | 0.01    |

## 1.2.8 Question 1: binary - Diet

| fct                          | term              | estimate | std.error | statistic | p.value |
|------------------------------|-------------------|----------|-----------|-----------|---------|
|                              | (Intercept)       | 0.69     | 0.02      | 36.76     | 0.00    |
| age                          | 41-60             | 0.43     | 0.03      | 14.59     | 0.00    |
|                              | <= 40             | 0.47     | 0.04      | 11.71     | 0.00    |
| education                    | (Intercept)       | 1.00     | 0.02      | 60.83     | 0.00    |
|                              | Lower             | -0.24    | 0.03      | -8.44     | 0.00    |
| gender                       | (Intercept)       | 1.03     | 0.02      | 63.33     | 0.00    |
|                              | Man               | -0.36    | 0.03      | -12.40    | 0.00    |
|                              | Other/Undisclosed | -0.06    | 0.20      | -0.32     | 0.75    |
| healthcare_experience        | (Intercept)       | 0.80     | 0.02      | 48.06     | 0.00    |
|                              | Yes               | 0.33     | 0.03      | 11.70     | 0.00    |
| cognitive_health             | (Intercept)       | 0.95     | 0.01      | 68.49     | 0.00    |
|                              | Below average     | -0.46    | 0.05      | -8.67     | 0.00    |
| mental_health                | (Intercept)       | 0.96     | 0.01      | 66.14     | 0.00    |
|                              | Below average     | -0.26    | 0.04      | -6.77     | 0.00    |
| illness_experience           | (Intercept)       | 0.98     | 0.02      | 55.61     | 0.00    |
|                              | Yes               | -0.13    | 0.03      | -4.76     | 0.00    |
| brain_disease_caregiver      | (Intercept)       | 0.85     | 0.02      | 46.89     | 0.00    |
|                              | Yes               | 0.17     | 0.03      | 6.29      | 0.00    |
| brain_research_participation | (Intercept)       | 0.90     | 0.02      | 51.08     | 0.00    |
|                              | Yes               | 0.04     | 0.03      | 1.59      | 0.11    |
| relationship                 | (Intercept)       | 0.94     | 0.02      | 46.61     | 0.00    |
|                              | Stable            | -0.04    | 0.03      | -1.41     | 0.16    |

## 1.2.9 Question 1: binary - Education

| fct                          | term              | estimate | std.error | statistic | p.value |
|------------------------------|-------------------|----------|-----------|-----------|---------|
|                              | (Intercept)       | 0.44     | 0.02      | 24.30     | 0.00    |
| age                          | 41-60             | -0.07    | 0.03      | -2.57     | 0.01    |
|                              | <= 40             | 0.11     | 0.04      | 2.97      | 0.00    |
| education                    | (Intercept)       | 0.59     | 0.02      | 38.77     | 0.00    |
|                              | Lower             | -0.48    | 0.03      | -18.32    | 0.00    |
| gender                       | (Intercept)       | 0.40     | 0.01      | 27.28     | 0.00    |
|                              | Man               | 0.12     | 0.03      | 4.40      | 0.00    |
|                              | Other/Undisclosed | 0.20     | 0.19      | 1.09      | 0.28    |
| healthcare_experience        | (Intercept)       | 0.32     | 0.02      | 20.77     | 0.00    |
|                              | Yes               | 0.29     | 0.03      | 11.23     | 0.00    |
| cognitive_health             | (Intercept)       | 0.46     | 0.01      | 35.77     | 0.00    |
|                              | Below average     | -0.39    | 0.05      | -7.57     | 0.00    |
| mental_health                | (Intercept)       | 0.48     | 0.01      | 35.81     | 0.00    |
|                              | Below average     | -0.33    | 0.04      | -9.05     | 0.00    |
| illness_experience           | (Intercept)       | 0.47     | 0.02      | 29.52     | 0.00    |
|                              | Yes               | -0.10    | 0.03      | -4.03     | 0.00    |
| brain_disease_caregiver      | (Intercept)       | 0.47     | 0.02      | 27.85     | 0.00    |
|                              | Yes               | -0.08    | 0.02      | -3.40     | 0.00    |
| brain_research_participation | (Intercept)       | 0.44     | 0.02      | 26.81     | 0.00    |
|                              | Yes               | -0.02    | 0.02      | -0.61     | 0.54    |
| relationship                 | (Intercept)       | 0.42     | 0.02      | 22.55     | 0.00    |
|                              | Stable            | 0.03     | 0.02      | 1.03      | 0.30    |

## 1.2.10 Question 1: binary - Profession

| fct                          | term              | estimate | std.error | statistic | p.value |
|------------------------------|-------------------|----------|-----------|-----------|---------|
|                              | (Intercept)       | 0.13     | 0.02      | 7.30      | 0.00    |
| age                          | 41-60             | 0.15     | 0.03      | 5.61      | 0.00    |
|                              | <= 40             | 0.29     | 0.04      | 8.08      | 0.00    |
| education                    | (Intercept)       | 0.32     | 0.01      | 21.78     | 0.00    |
|                              | Lower             | -0.28    | 0.03      | -10.78    | 0.00    |
| gender                       | (Intercept)       | 0.19     | 0.01      | 12.91     | 0.00    |
|                              | Man               | 0.17     | 0.03      | 6.11      | 0.00    |
|                              | Other/Undisclosed | -0.01    | 0.18      | -0.07     | 0.95    |
| healthcare_experience        | (Intercept)       | 0.15     | 0.02      | 9.99      | 0.00    |
|                              | Yes               | 0.20     | 0.03      | 8.10      | 0.00    |
| cognitive_health             | (Intercept)       | 0.24     | 0.01      | 19.47     | 0.00    |
|                              | Below average     | -0.20    | 0.05      | -3.92     | 0.00    |
| mental_health                | (Intercept)       | 0.25     | 0.01      | 19.12     | 0.00    |
|                              | Below average     | -0.13    | 0.04      | -3.69     | 0.00    |
| illness_experience           | (Intercept)       | 0.26     | 0.02      | 16.25     | 0.00    |
|                              | Yes               | -0.06    | 0.02      | -2.38     | 0.02    |
| brain_disease_caregiver      | (Intercept)       | 0.29     | 0.02      | 17.29     | 0.00    |
|                              | Yes               | -0.12    | 0.02      | -4.94     | 0.00    |
| brain_research_participation | (Intercept)       | 0.29     | 0.02      | 18.13     | 0.00    |
|                              | Yes               | -0.14    | 0.02      | -5.77     | 0.00    |
| relationship                 | (Intercept)       | 0.24     | 0.02      | 13.32     | 0.00    |
|                              | Stable            | -0.02    | 0.02      | -0.86     | 0.39    |



## 1.2.11 Question 1: binary - Income

| fct                          | term              | estimate | std.error | statistic | p.value |
|------------------------------|-------------------|----------|-----------|-----------|---------|
|                              | (Intercept)       | -0.54    | 0.02      | -29.28    | 0.00    |
| age                          | 41-60             | -0.02    | 0.03      | -0.87     | 0.38    |
|                              | <= 40             | -0.21    | 0.04      | -5.81     | 0.00    |
| education                    | (Intercept)       | -0.62    | 0.02      | -40.31    | 0.00    |
|                              | Lower             | 0.10     | 0.03      | 3.86      | 0.00    |
| gender                       | (Intercept)       | -0.57    | 0.01      | -38.16    | 0.00    |
|                              | Man               | -0.05    | 0.03      | -1.88     | 0.06    |
|                              | Other/Undisclosed | 0.17     | 0.18      | 0.93      | 0.35    |
| healthcare_experience        | (Intercept)       | -0.69    | 0.02      | -42.09    | 0.00    |
|                              | Yes               | 0.27     | 0.03      | 10.31     | 0.00    |
| cognitive_health             | (Intercept)       | -0.58    | 0.01      | -45.02    | 0.00    |
|                              | Below average     | 0.04     | 0.05      | 0.74      | 0.46    |
| mental_health                | (Intercept)       | -0.58    | 0.01      | -43.13    | 0.00    |
|                              | Below average     | 0.00     | 0.04      | 0.07      | 0.94    |
| illness_experience           | (Intercept)       | -0.64    | 0.02      | -38.97    | 0.00    |
|                              | Yes               | 0.14     | 0.03      | 5.57      | 0.00    |
| brain_disease_caregiver      | (Intercept)       | -0.60    | 0.02      | -34.83    | 0.00    |
|                              | Yes               | 0.04     | 0.03      | 1.58      | 0.11    |
| brain_research_participation | (Intercept)       | -0.61    | 0.02      | -36.13    | 0.00    |
|                              | Yes               | 0.05     | 0.03      | 2.11      | 0.03    |
| relationship                 | (Intercept)       | -0.58    | 0.02      | -30.68    | 0.00    |
|                              | Stable            | 0.00     | 0.03      | -0.05     | 0.96    |

## 1.3 Ordinal models

## 1.3.1 Question 1: ordinal - Substance use

| fct                   | term               | estimate | std.error | statistic | coef.type   |
|-----------------------|--------------------|----------|-----------|-----------|-------------|
| age                   | 41-60              | 0.39     | 0.03      | 14.67     | coefficient |
|                       | <= 40              | 0.34     | 0.04      | 9.72      | coefficient |
|                       | No influence Weak  | -4.46    | 0.06      | -70.54    | scale       |
|                       | Weak Moderate      | -3.83    | 0.05      | -81.10    | scale       |
|                       | Moderate Strong    | -2.30    | 0.03      | -90.12    | scale       |
|                       | Strong Very strong | -0.24    | 0.02      | -13.80    | scale       |
| education             | Lower              | -0.09    | 0.03      | -3.35     | coefficient |
|                       | No influence Weak  | -4.68    | 0.06      | -74.45    | scale       |
|                       | Weak Moderate      | -4.05    | 0.05      | -86.82    | scale       |
|                       | Moderate Strong    | -2.52    | 0.02      | -104.14   | scale       |
|                       | Strong Very strong | -0.47    | 0.01      | -31.83    | scale       |
| gender                | Man                | -0.29    | 0.03      | -10.73    | coefficient |
|                       | Other/Undisclosed  | -0.43    | 0.18      | -2.47     | coefficient |
|                       | No influence Weak  | -4.74    | 0.06      | -75.43    | scale       |
|                       | Weak Moderate      | -4.11    | 0.05      | -88.06    | scale       |
|                       | Moderate Strong    | -2.58    | 0.02      | -106.26   | scale       |
| healthcare_experience | Strong Very strong | -0.53    | 0.01      | -35.98    | scale       |
|                       | Yes                | 0.28     | 0.03      | 10.92     | coefficient |
|                       | No influence Weak  | -4.55    | 0.06      | -72.48    | scale       |
|                       | Weak Moderate      | -3.92    | 0.05      | -84.11    | scale       |
|                       | Moderate Strong    | -2.39    | 0.02      | -98.36    | scale       |
| cognitive_health      | Strong Very strong | -0.34    | 0.02      | -21.92    | scale       |
|                       | Below average      | -0.37    | 0.05      | -7.45     | coefficient |
|                       | No influence Weak  | -4.67    | 0.06      | -75.00    | scale       |
|                       | Weak Moderate      | -4.05    | 0.05      | -87.95    | scale       |
|                       | Moderate Strong    | -2.52    | 0.02      | -109.46   | scale       |
| mental_health         | Strong Very strong | -0.47    | 0.01      | -36.63    | scale       |
|                       | Below average      | -0.07    | 0.04      | -1.99     | coefficient |
|                       | No influence Weak  | -4.66    | 0.06      | -74.64    | scale       |
|                       | Weak Moderate      | -4.03    | 0.05      | -87.40    | scale       |
|                       | Moderate Strong    | -2.50    | 0.02      | -107.73   | scale       |
|                       | Strong Very strong | -0.45    | 0.01      | -34.30    | scale       |
|                       | Yes                | -0.09    | 0.02      | -3.69     | coefficient |
|                       | No influence Weak  | -4.69    | 0.06      | -74.23    | scale       |
|                       | Weak Moderate      | -4.06    | 0.05      | -86.32    | scale       |
|                       | Moderate Strong    | -2.53    | 0.02      | -101.57   | scale       |

*(continued)*

| illness_experience           | term               | estimate | std.error | statistic | coef.type   |
|------------------------------|--------------------|----------|-----------|-----------|-------------|
|                              | Strong Very strong | -0.48    | 0.02      | -30.26    | scale       |
|                              | Yes                | 0.00     | 0.02      | -0.07     | coefficient |
|                              | No influence Weak  | -4.65    | 0.06      | -73.52    | scale       |
| brain_disease_caregiver      | Weak Moderate      | -4.02    | 0.05      | -85.14    | scale       |
|                              | Moderate Strong    | -2.49    | 0.03      | -98.15    | scale       |
|                              | Strong Very strong | -0.45    | 0.02      | -26.55    | scale       |
|                              | Yes                | -0.07    | 0.02      | -2.85     | coefficient |
|                              | No influence Weak  | -4.68    | 0.06      | -74.10    | scale       |
| brain_research_participation | Weak Moderate      | -4.05    | 0.05      | -85.99    | scale       |
|                              | Moderate Strong    | -2.52    | 0.03      | -100.22   | scale       |
|                              | Strong Very strong | -0.48    | 0.02      | -29.08    | scale       |
|                              | Stable             | 0.02     | 0.02      | 0.64      | coefficient |
|                              | No influence Weak  | -4.64    | 0.06      | -72.86    | scale       |
| relationship                 | Weak Moderate      | -4.01    | 0.05      | -83.90    | scale       |
|                              | Moderate Strong    | -2.48    | 0.03      | -93.80    | scale       |
|                              | Strong Very strong | -0.44    | 0.02      | -23.67    | scale       |

## 1.3.2 Question 1: ordinal - Genetics

| fct                   | term               | estimate | std.error | statistic | coef.type   |
|-----------------------|--------------------|----------|-----------|-----------|-------------|
| age                   | 41-60              | 0.06     | 0.02      | 2.43      | coefficient |
|                       | <= 40              | -0.26    | 0.03      | -8.02     | coefficient |
|                       | No influence Weak  | -5.52    | 0.10      | -58.02    | scale       |
|                       | Weak Moderate      | -3.74    | 0.04      | -90.21    | scale       |
|                       | Moderate Strong    | -1.56    | 0.02      | -78.11    | scale       |
|                       | Strong Very strong | 0.48     | 0.02      | 27.58     | scale       |
| education             | Lower              | -0.04    | 0.02      | -1.68     | coefficient |
|                       | No influence Weak  | -5.50    | 0.09      | -58.18    | scale       |
|                       | Weak Moderate      | -3.72    | 0.04      | -92.50    | scale       |
|                       | Moderate Strong    | -1.55    | 0.02      | -88.31    | scale       |
|                       | Strong Very strong | 0.48     | 0.01      | 33.17     | scale       |
| gender                | Man                | -0.20    | 0.03      | -8.11     | coefficient |
|                       | Other/Undisclosed  | -0.72    | 0.17      | -4.28     | coefficient |
|                       | No influence Weak  | -5.56    | 0.09      | -58.73    | scale       |
|                       | Weak Moderate      | -3.78    | 0.04      | -93.72    | scale       |
|                       | Moderate Strong    | -1.61    | 0.02      | -91.27    | scale       |
| healthcare_experience | Strong Very strong | 0.44     | 0.01      | 30.60     | scale       |
|                       | Yes                | 0.08     | 0.02      | 3.46      | coefficient |
|                       | No influence Weak  | -5.46    | 0.09      | -57.67    | scale       |
|                       | Weak Moderate      | -3.68    | 0.04      | -90.99    | scale       |
|                       | Moderate Strong    | -1.51    | 0.02      | -83.44    | scale       |
| cognitive_health      | Strong Very strong | 0.53     | 0.02      | 34.26     | scale       |
|                       | Below average      | -0.07    | 0.05      | -1.43     | coefficient |
|                       | No influence Weak  | -5.49    | 0.09      | -58.25    | scale       |
|                       | Weak Moderate      | -3.71    | 0.04      | -93.77    | scale       |
|                       | Moderate Strong    | -1.55    | 0.02      | -96.07    | scale       |
| mental_health         | Strong Very strong | 0.49     | 0.01      | 38.60     | scale       |
|                       | Below average      | 0.07     | 0.03      | 1.98      | coefficient |
|                       | No influence Weak  | -5.48    | 0.09      | -58.09    | scale       |
|                       | Weak Moderate      | -3.70    | 0.04      | -93.19    | scale       |
|                       | Moderate Strong    | -1.53    | 0.02      | -93.54    | scale       |
|                       | Strong Very strong | 0.50     | 0.01      | 38.23     | scale       |
|                       | Yes                | 0.06     | 0.02      | 2.63      | coefficient |
|                       | No influence Weak  | -5.47    | 0.09      | -57.72    | scale       |
|                       | Weak Moderate      | -3.69    | 0.04      | -90.97    | scale       |
|                       | Moderate Strong    | -1.52    | 0.02      | -83.06    | scale       |

*(continued)*

| illness_experience           | term               | estimate | std.error | statistic | coef.type   |
|------------------------------|--------------------|----------|-----------|-----------|-------------|
|                              | Strong Very strong | 0.52     | 0.02      | 33.45     | scale       |
|                              | Yes                | 0.33     | 0.02      | 14.68     | coefficient |
|                              | No influence Weak  | -5.35    | 0.09      | -56.46    | scale       |
| brain_disease_caregiver      | Weak Moderate      | -3.57    | 0.04      | -87.86    | scale       |
|                              | Moderate Strong    | -1.39    | 0.02      | -74.82    | scale       |
|                              | Strong Very strong | 0.66     | 0.02      | 39.48     | scale       |
|                              | Yes                | 0.18     | 0.02      | 7.88      | coefficient |
|                              | No influence Weak  | -5.42    | 0.09      | -57.18    | scale       |
| brain_research_participation | Weak Moderate      | -3.64    | 0.04      | -89.64    | scale       |
|                              | Moderate Strong    | -1.47    | 0.02      | -79.50    | scale       |
|                              | Strong Very strong | 0.58     | 0.02      | 35.91     | scale       |
|                              | Stable             | 0.13     | 0.02      | 5.75      | coefficient |
|                              | No influence Weak  | -5.42    | 0.10      | -57.00    | scale       |
| relationship                 | Weak Moderate      | -3.64    | 0.04      | -87.98    | scale       |
|                              | Moderate Strong    | -1.47    | 0.02      | -72.90    | scale       |
|                              | Strong Very strong | 0.57     | 0.02      | 31.78     | scale       |

## 1.3.3 Question 1: ordinal - Physical health

| fct                   | term               | estimate | std.error | statistic | coef.type   |
|-----------------------|--------------------|----------|-----------|-----------|-------------|
| age                   | 41-60              | 0.20     | 0.03      | 7.91      | coefficient |
|                       | <= 40              | 0.27     | 0.03      | 8.06      | coefficient |
|                       | No influence Weak  | -5.95    | 0.13      | -47.31    | scale       |
|                       | Weak Moderate      | -4.04    | 0.05      | -80.42    | scale       |
|                       | Moderate Strong    | -1.83    | 0.02      | -84.28    | scale       |
|                       | Strong Very strong | 0.67     | 0.02      | 37.75     | scale       |
| education             | Lower              | -0.31    | 0.03      | -12.46    | coefficient |
|                       | No influence Weak  | -6.17    | 0.13      | -49.15    | scale       |
|                       | Weak Moderate      | -4.26    | 0.05      | -85.72    | scale       |
|                       | Moderate Strong    | -2.05    | 0.02      | -101.07   | scale       |
|                       | Strong Very strong | 0.46     | 0.01      | 31.42     | scale       |
| gender                | Man                | -0.17    | 0.03      | -6.76     | coefficient |
|                       | Other/Undisclosed  | 0.01     | 0.17      | 0.07      | coefficient |
|                       | No influence Weak  | -6.11    | 0.13      | -48.76    | scale       |
|                       | Weak Moderate      | -4.20    | 0.05      | -84.92    | scale       |
|                       | Moderate Strong    | -1.99    | 0.02      | -100.46   | scale       |
| healthcare_experience | Strong Very strong | 0.51     | 0.01      | 35.05     | scale       |
|                       | Yes                | 0.33     | 0.02      | 13.89     | coefficient |
|                       | No influence Weak  | -5.94    | 0.13      | -47.40    | scale       |
|                       | Weak Moderate      | -4.03    | 0.05      | -81.54    | scale       |
|                       | Moderate Strong    | -1.82    | 0.02      | -91.10    | scale       |
| cognitive_health      | Strong Very strong | 0.69     | 0.02      | 43.32     | scale       |
|                       | Below average      | -0.41    | 0.05      | -8.22     | coefficient |
|                       | No influence Weak  | -6.09    | 0.13      | -48.64    | scale       |
|                       | Weak Moderate      | -4.18    | 0.05      | -85.31    | scale       |
|                       | Moderate Strong    | -1.97    | 0.02      | -105.97   | scale       |
| mental_health         | Strong Very strong | 0.53     | 0.01      | 41.47     | scale       |
|                       | Below average      | -0.19    | 0.03      | -5.38     | coefficient |
|                       | No influence Weak  | -6.09    | 0.13      | -48.59    | scale       |
|                       | Weak Moderate      | -4.18    | 0.05      | -85.07    | scale       |
|                       | Moderate Strong    | -1.97    | 0.02      | -104.22   | scale       |
|                       | Strong Very strong | 0.53     | 0.01      | 39.99     | scale       |
|                       | Yes                | -0.13    | 0.02      | -5.53     | coefficient |
|                       | No influence Weak  | -6.11    | 0.13      | -48.70    | scale       |
|                       | Weak Moderate      | -4.20    | 0.05      | -84.34    | scale       |
|                       | Moderate Strong    | -2.00    | 0.02      | -96.25    | scale       |

*(continued)*

| illness_experience           | term               | estimate | std.error | statistic | coef.type   |
|------------------------------|--------------------|----------|-----------|-----------|-------------|
|                              | Strong Very strong | 0.50     | 0.02      | 32.13     | scale       |
|                              | Yes                | 0.12     | 0.02      | 5.03      | coefficient |
|                              | No influence Weak  | -6.01    | 0.13      | -47.83    | scale       |
|                              | Weak Moderate      | -4.10    | 0.05      | -82.10    | scale       |
| brain_disease_caregiver      | Moderate Strong    | -1.89    | 0.02      | -89.99    | scale       |
|                              | Strong Very strong | 0.61     | 0.02      | 36.60     | scale       |
|                              | Yes                | 0.06     | 0.02      | 2.39      | coefficient |
|                              | No influence Weak  | -6.04    | 0.13      | -48.08    | scale       |
|                              | Weak Moderate      | -4.13    | 0.05      | -82.83    | scale       |
| brain_research_participation | Moderate Strong    | -1.92    | 0.02      | -92.45    | scale       |
|                              | Strong Very strong | 0.58     | 0.02      | 35.84     | scale       |
|                              | Stable             | 0.00     | 0.02      | 0.02      | coefficient |
|                              | No influence Weak  | -6.06    | 0.13      | -48.16    | scale       |
|                              | Weak Moderate      | -4.15    | 0.05      | -82.11    | scale       |
| relationship                 | Moderate Strong    | -1.94    | 0.02      | -86.55    | scale       |
|                              | Strong Very strong | 0.55     | 0.02      | 30.60     | scale       |

## 1.3.4 Question 1: ordinal - Sleeping habits

| fct                   | term               | estimate | std.error | statistic | coef.type   |
|-----------------------|--------------------|----------|-----------|-----------|-------------|
| age                   | 41-60              | 0.74     | 0.03      | 28.81     | coefficient |
|                       | <= 40              | 1.14     | 0.03      | 33.41     | coefficient |
|                       | No influence Weak  | -5.44    | 0.11      | -49.04    | scale       |
|                       | Weak Moderate      | -3.69    | 0.05      | -77.33    | scale       |
|                       | Moderate Strong    | -1.35    | 0.02      | -67.92    | scale       |
|                       | Strong Very strong | 1.07     | 0.02      | 56.79     | scale       |
| education             | Lower              | -0.15    | 0.02      | -6.24     | coefficient |
|                       | No influence Weak  | -5.86    | 0.11      | -52.86    | scale       |
|                       | Weak Moderate      | -4.11    | 0.05      | -86.58    | scale       |
|                       | Moderate Strong    | -1.79    | 0.02      | -95.26    | scale       |
|                       | Strong Very strong | 0.53     | 0.01      | 36.39     | scale       |
| gender                | Man                | -0.32    | 0.03      | -12.44    | coefficient |
|                       | Other/Undisclosed  | 0.14     | 0.17      | 0.85      | coefficient |
|                       | No influence Weak  | -5.91    | 0.11      | -53.29    | scale       |
|                       | Weak Moderate      | -4.16    | 0.05      | -87.53    | scale       |
|                       | Moderate Strong    | -1.84    | 0.02      | -97.66    | scale       |
| healthcare_experience | Strong Very strong | 0.50     | 0.01      | 34.50     | scale       |
|                       | Yes                | 0.27     | 0.02      | 11.54     | coefficient |
|                       | No influence Weak  | -5.71    | 0.11      | -51.54    | scale       |
|                       | Weak Moderate      | -3.97    | 0.05      | -83.53    | scale       |
|                       | Moderate Strong    | -1.64    | 0.02      | -86.84    | scale       |
| cognitive_health      | Strong Very strong | 0.69     | 0.02      | 43.78     | scale       |
|                       | Below average      | 0.13     | 0.05      | 2.56      | coefficient |
|                       | No influence Weak  | -5.80    | 0.11      | -52.46    | scale       |
|                       | Weak Moderate      | -4.05    | 0.05      | -86.56    | scale       |
|                       | Moderate Strong    | -1.73    | 0.02      | -101.13   | scale       |
| mental_health         | Strong Very strong | 0.59     | 0.01      | 45.60     | scale       |
|                       | Below average      | 0.33     | 0.03      | 9.69      | coefficient |
|                       | No influence Weak  | -5.77    | 0.11      | -52.18    | scale       |
|                       | Weak Moderate      | -4.02    | 0.05      | -85.77    | scale       |
|                       | Moderate Strong    | -1.70    | 0.02      | -97.95    | scale       |
|                       | Strong Very strong | 0.63     | 0.01      | 46.59     | scale       |
|                       | Yes                | 0.11     | 0.02      | 4.68      | coefficient |
|                       | No influence Weak  | -5.77    | 0.11      | -52.00    | scale       |
|                       | Weak Moderate      | -4.02    | 0.05      | -84.40    | scale       |
|                       | Moderate Strong    | -1.70    | 0.02      | -88.30    | scale       |



*(continued)*

| illness_experience           | term               | estimate | std.error | statistic | coef.type   |
|------------------------------|--------------------|----------|-----------|-----------|-------------|
|                              | Strong Very strong | 0.63     | 0.02      | 39.62     | scale       |
|                              | Yes                | -0.10    | 0.02      | -4.43     | coefficient |
|                              | No influence Weak  | -5.86    | 0.11      | -52.74    | scale       |
| brain_disease_caregiver      | Weak Moderate      | -4.11    | 0.05      | -85.51    | scale       |
|                              | Moderate Strong    | -1.79    | 0.02      | -88.46    | scale       |
|                              | Strong Very strong | 0.53     | 0.02      | 32.47     | scale       |
|                              | Yes                | -0.32    | 0.02      | -13.94    | coefficient |
|                              | No influence Weak  | -5.96    | 0.11      | -53.64    | scale       |
| brain_research_participation | Weak Moderate      | -4.21    | 0.05      | -87.55    | scale       |
|                              | Moderate Strong    | -1.89    | 0.02      | -93.42    | scale       |
|                              | Strong Very strong | 0.45     | 0.02      | 28.09     | scale       |
|                              | Stable             | -0.27    | 0.02      | -11.56    | coefficient |
|                              | No influence Weak  | -5.97    | 0.11      | -53.55    | scale       |
| relationship                 | Weak Moderate      | -4.22    | 0.05      | -86.43    | scale       |
|                              | Moderate Strong    | -1.90    | 0.02      | -86.79    | scale       |
|                              | Strong Very strong | 0.43     | 0.02      | 24.26     | scale       |

## 1.3.5 Question 1: ordinal - Social environment

| fct                   | term               | estimate | std.error | statistic | coef.type   |
|-----------------------|--------------------|----------|-----------|-----------|-------------|
| age                   | 41-60              | 0.31     | 0.03      | 12.49     | coefficient |
|                       | <= 40              | 0.69     | 0.03      | 20.60     | coefficient |
|                       | No influence Weak  | -5.54    | 0.11      | -51.62    | scale       |
|                       | Weak Moderate      | -3.53    | 0.04      | -85.29    | scale       |
|                       | Moderate Strong    | -1.36    | 0.02      | -69.53    | scale       |
|                       | Strong Very strong | 0.87     | 0.02      | 47.81     | scale       |
| education             | Lower              | -0.14    | 0.02      | -5.87     | coefficient |
|                       | No influence Weak  | -5.79    | 0.11      | -54.06    | scale       |
|                       | Weak Moderate      | -3.78    | 0.04      | -92.66    | scale       |
|                       | Moderate Strong    | -1.61    | 0.02      | -90.26    | scale       |
|                       | Strong Very strong | 0.58     | 0.01      | 39.71     | scale       |
| gender                | Man                | -0.26    | 0.03      | -10.44    | coefficient |
|                       | Other/Undisclosed  | 0.49     | 0.17      | 2.88      | coefficient |
|                       | No influence Weak  | -5.82    | 0.11      | -54.37    | scale       |
|                       | Weak Moderate      | -3.82    | 0.04      | -93.47    | scale       |
|                       | Moderate Strong    | -1.64    | 0.02      | -92.34    | scale       |
| healthcare_experience | Strong Very strong | 0.56     | 0.01      | 38.71     | scale       |
|                       | Yes                | 0.33     | 0.02      | 14.11     | coefficient |
|                       | No influence Weak  | -5.63    | 0.11      | -52.55    | scale       |
|                       | Weak Moderate      | -3.62    | 0.04      | -88.81    | scale       |
|                       | Moderate Strong    | -1.45    | 0.02      | -80.46    | scale       |
| cognitive_health      | Strong Very strong | 0.76     | 0.02      | 47.99     | scale       |
|                       | Below average      | -0.28    | 0.05      | -5.79     | coefficient |
|                       | No influence Weak  | -5.76    | 0.11      | -53.93    | scale       |
|                       | Weak Moderate      | -3.76    | 0.04      | -93.54    | scale       |
|                       | Moderate Strong    | -1.58    | 0.02      | -97.31    | scale       |
| mental_health         | Strong Very strong | 0.61     | 0.01      | 47.36     | scale       |
|                       | Below average      | 0.12     | 0.03      | 3.44      | coefficient |
|                       | No influence Weak  | -5.73    | 0.11      | -53.60    | scale       |
|                       | Weak Moderate      | -3.72    | 0.04      | -92.56    | scale       |
|                       | Moderate Strong    | -1.55    | 0.02      | -94.06    | scale       |
|                       | Strong Very strong | 0.64     | 0.01      | 47.92     | scale       |
|                       | Yes                | -0.04    | 0.02      | -1.55     | coefficient |
|                       | No influence Weak  | -5.76    | 0.11      | -53.70    | scale       |
|                       | Weak Moderate      | -3.75    | 0.04      | -91.26    | scale       |
|                       | Moderate Strong    | -1.58    | 0.02      | -85.29    | scale       |

*(continued)*

| illness_experience           | term               | estimate | std.error | statistic | coef.type   |
|------------------------------|--------------------|----------|-----------|-----------|-------------|
| illness_experience           | Strong Very strong | 0.61     | 0.02      | 39.10     | scale       |
|                              | Yes                | 0.02     | 0.02      | 0.99      | coefficient |
|                              | No influence Weak  | -5.73    | 0.11      | -53.41    | scale       |
|                              | Weak Moderate      | -3.73    | 0.04      | -90.10    | scale       |
|                              | Moderate Strong    | -1.56    | 0.02      | -81.28    | scale       |
| brain_disease_caregiver      | Strong Very strong | 0.64     | 0.02      | 38.63     | scale       |
|                              | Yes                | -0.10    | 0.02      | -4.47     | coefficient |
|                              | No influence Weak  | -5.79    | 0.11      | -53.95    | scale       |
|                              | Weak Moderate      | -3.78    | 0.04      | -91.56    | scale       |
|                              | Moderate Strong    | -1.61    | 0.02      | -85.02    | scale       |
| brain_research_participation | Strong Very strong | 0.58     | 0.02      | 36.48     | scale       |
|                              | Stable             | -0.12    | 0.02      | -5.23     | coefficient |
|                              | No influence Weak  | -5.81    | 0.11      | -54.01    | scale       |
|                              | Weak Moderate      | -3.81    | 0.04      | -90.29    | scale       |
|                              | Moderate Strong    | -1.63    | 0.02      | -78.89    | scale       |
| relationship                 | Strong Very strong | 0.56     | 0.02      | 31.25     | scale       |

## 1.3.6 Question 1: ordinal - Life goals

| fct                   | term               | estimate | std.error | statistic | coef.type   |
|-----------------------|--------------------|----------|-----------|-----------|-------------|
| age                   | 41-60              | 0.02     | 0.02      | 0.87      | coefficient |
|                       | <= 40              | -0.17    | 0.03      | -5.34     | coefficient |
|                       | No influence Weak  | -4.63    | 0.06      | -74.53    | scale       |
|                       | Weak Moderate      | -2.92    | 0.03      | -98.27    | scale       |
|                       | Moderate Strong    | -1.00    | 0.02      | -55.54    | scale       |
|                       | Strong Very strong | 1.01     | 0.02      | 55.67     | scale       |
| education             | Lower              | -0.08    | 0.02      | -3.26     | coefficient |
|                       | No influence Weak  | -4.63    | 0.06      | -75.38    | scale       |
|                       | Weak Moderate      | -2.93    | 0.03      | -103.62   | scale       |
|                       | Moderate Strong    | -1.01    | 0.02      | -64.62    | scale       |
| gender                | Strong Very strong | 1.00     | 0.02      | 64.24     | scale       |
|                       | Man                | -0.13    | 0.02      | -5.35     | coefficient |
|                       | Other/Undisclosed  | 0.06     | 0.17      | 0.35      | coefficient |
|                       | No influence Weak  | -4.65    | 0.06      | -75.58    | scale       |
|                       | Weak Moderate      | -2.94    | 0.03      | -104.40   | scale       |
| healthcare_experience | Moderate Strong    | -1.02    | 0.02      | -66.35    | scale       |
|                       | Strong Very strong | 0.99     | 0.02      | 64.49     | scale       |
|                       | Yes                | 0.24     | 0.02      | 10.53     | coefficient |
|                       | No influence Weak  | -4.52    | 0.06      | -73.52    | scale       |
|                       | Weak Moderate      | -2.81    | 0.03      | -99.32    | scale       |
| cognitive_health      | Moderate Strong    | -0.89    | 0.02      | -55.81    | scale       |
|                       | Strong Very strong | 1.12     | 0.02      | 67.64     | scale       |
|                       | Below average      | -0.10    | 0.05      | -2.05     | coefficient |
|                       | No influence Weak  | -4.61    | 0.06      | -75.60    | scale       |
|                       | Weak Moderate      | -2.91    | 0.03      | -106.49   | scale       |
| mental_health         | Moderate Strong    | -0.99    | 0.01      | -71.40    | scale       |
|                       | Strong Very strong | 1.02     | 0.01      | 73.06     | scale       |
|                       | Below average      | -0.11    | 0.03      | -3.12     | coefficient |
|                       | No influence Weak  | -4.62    | 0.06      | -75.58    | scale       |
|                       | Weak Moderate      | -2.92    | 0.03      | -105.90   | scale       |
|                       | Moderate Strong    | -1.00    | 0.01      | -70.04    | scale       |
|                       | Strong Very strong | 1.01     | 0.01      | 70.80     | scale       |
|                       | Yes                | 0.04     | 0.02      | 1.74      | coefficient |
|                       | No influence Weak  | -4.59    | 0.06      | -74.52    | scale       |
|                       | Weak Moderate      | -2.89    | 0.03      | -100.89   | scale       |
|                       | Moderate Strong    | -0.97    | 0.02      | -59.31    | scale       |

*(continued)*

| illness_experience           | term               | estimate | std.error | statistic | coef.type   |
|------------------------------|--------------------|----------|-----------|-----------|-------------|
|                              | Strong Very strong | 1.04     | 0.02      | 63.02     | scale       |
|                              | Yes                | -0.03    | 0.02      | -1.45     | coefficient |
|                              | No influence Weak  | -4.62    | 0.06      | -74.73    | scale       |
| brain_disease_caregiver      | Weak Moderate      | -2.92    | 0.03      | -100.18   | scale       |
|                              | Moderate Strong    | -1.00    | 0.02      | -58.29    | scale       |
|                              | Strong Very strong | 1.01     | 0.02      | 58.85     | scale       |
|                              | Yes                | -0.15    | 0.02      | -6.60     | coefficient |
|                              | No influence Weak  | -4.67    | 0.06      | -75.61    | scale       |
| brain_research_participation | Weak Moderate      | -2.97    | 0.03      | -102.21   | scale       |
|                              | Moderate Strong    | -1.05    | 0.02      | -62.08    | scale       |
|                              | Strong Very strong | 0.96     | 0.02      | 57.71     | scale       |
|                              | Stable             | -0.04    | 0.02      | -1.57     | coefficient |
|                              | No influence Weak  | -4.63    | 0.06      | -74.30    | scale       |
| relationship                 | Weak Moderate      | -2.92    | 0.03      | -97.38    | scale       |
|                              | Moderate Strong    | -1.00    | 0.02      | -53.84    | scale       |
|                              | Strong Very strong | 1.01     | 0.02      | 53.97     | scale       |

## 1.3.7 Question 1: ordinal - Physical environment

| fct                   | term               | estimate | std.error | statistic | coef.type   |
|-----------------------|--------------------|----------|-----------|-----------|-------------|
| age                   | 41-60              | 0.20     | 0.02      | 8.20      | coefficient |
|                       | <= 40              | 0.13     | 0.03      | 3.99      | coefficient |
|                       | No influence Weak  | -5.48    | 0.10      | -55.39    | scale       |
|                       | Weak Moderate      | -3.06    | 0.03      | -93.95    | scale       |
|                       | Moderate Strong    | -0.84    | 0.02      | -46.96    | scale       |
|                       | Strong Very strong | 1.17     | 0.02      | 62.60     | scale       |
| education             | Lower              | 0.06     | 0.02      | 2.28      | coefficient |
|                       | No influence Weak  | -5.55    | 0.10      | -56.38    | scale       |
|                       | Weak Moderate      | -3.14    | 0.03      | -100.07   | scale       |
|                       | Moderate Strong    | -0.92    | 0.02      | -59.88    | scale       |
| gender                | Strong Very strong | 1.09     | 0.02      | 68.64     | scale       |
|                       | Man                | -0.16    | 0.02      | -6.41     | coefficient |
|                       | Other/Undisclosed  | 0.29     | 0.17      | 1.72      | coefficient |
|                       | No influence Weak  | -5.62    | 0.10      | -57.01    | scale       |
|                       | Weak Moderate      | -3.20    | 0.03      | -101.87   | scale       |
| healthcare_experience | Moderate Strong    | -0.98    | 0.02      | -64.11    | scale       |
|                       | Strong Very strong | 1.03     | 0.02      | 66.41     | scale       |
|                       | Yes                | 0.19     | 0.02      | 8.16      | coefficient |
|                       | No influence Weak  | -5.50    | 0.10      | -55.95    | scale       |
|                       | Weak Moderate      | -3.09    | 0.03      | -97.73    | scale       |
| cognitive_health      | Moderate Strong    | -0.87    | 0.02      | -54.33    | scale       |
|                       | Strong Very strong | 1.14     | 0.02      | 68.65     | scale       |
|                       | Below average      | -0.19    | 0.05      | -3.84     | coefficient |
|                       | No influence Weak  | -5.58    | 0.10      | -56.80    | scale       |
| mental_health         | Weak Moderate      | -3.17    | 0.03      | -103.33   | scale       |
|                       | Moderate Strong    | -0.95    | 0.01      | -68.97    | scale       |
|                       | Strong Very strong | 1.06     | 0.01      | 75.12     | scale       |
|                       | Below average      | -0.07    | 0.03      | -2.05     | coefficient |
|                       | No influence Weak  | -5.58    | 0.10      | -56.74    | scale       |
|                       | Weak Moderate      | -3.16    | 0.03      | -102.66   | scale       |
|                       | Moderate Strong    | -0.95    | 0.01      | -66.89    | scale       |
|                       | Strong Very strong | 1.06     | 0.01      | 73.20     | scale       |
|                       | Yes                | 0.13     | 0.02      | 5.86      | coefficient |
|                       | No influence Weak  | -5.52    | 0.10      | -56.02    | scale       |
|                       | Weak Moderate      | -3.10    | 0.03      | -97.87    | scale       |
|                       | Moderate Strong    | -0.88    | 0.02      | -54.73    | scale       |

*(continued)*

| illness_experience           | term               | estimate | std.error | statistic | coef.type   |
|------------------------------|--------------------|----------|-----------|-----------|-------------|
|                              | Strong Very strong | 1.12     | 0.02      | 66.99     | scale       |
|                              | Yes                | 0.04     | 0.02      | 1.69      | coefficient |
|                              | No influence Weak  | -5.55    | 0.10      | -56.22    | scale       |
| brain_disease_caregiver      | Weak Moderate      | -3.14    | 0.03      | -97.48    | scale       |
|                              | Moderate Strong    | -0.92    | 0.02      | -54.10    | scale       |
|                              | Strong Very strong | 1.09     | 0.02      | 62.46     | scale       |
|                              | Yes                | 0.02     | 0.02      | 0.76      | coefficient |
|                              | No influence Weak  | -5.56    | 0.10      | -56.36    | scale       |
| brain_research_participation | Weak Moderate      | -3.15    | 0.03      | -98.37    | scale       |
|                              | Moderate Strong    | -0.93    | 0.02      | -55.96    | scale       |
|                              | Strong Very strong | 1.08     | 0.02      | 63.41     | scale       |
|                              | Stable             | -0.08    | 0.02      | -3.71     | coefficient |
|                              | No influence Weak  | -5.62    | 0.10      | -56.73    | scale       |
| relationship                 | Weak Moderate      | -3.20    | 0.03      | -96.71    | scale       |
|                              | Moderate Strong    | -0.98    | 0.02      | -53.00    | scale       |
|                              | Strong Very strong | 1.02     | 0.02      | 54.83     | scale       |

## 1.3.8 Question 1: ordinal - Diet

| fct                   | term               | estimate | std.error | statistic | coef.type   |
|-----------------------|--------------------|----------|-----------|-----------|-------------|
| age                   | 41-60              | 0.42     | 0.02      | 17.02     | coefficient |
|                       | <= 40              | 0.53     | 0.03      | 16.22     | coefficient |
|                       | No influence Weak  | -4.61    | 0.07      | -66.74    | scale       |
|                       | Weak Moderate      | -2.84    | 0.03      | -91.06    | scale       |
|                       | Moderate Strong    | -0.69    | 0.02      | -38.82    | scale       |
|                       | Strong Very strong | 1.45     | 0.02      | 73.97     | scale       |
| education             | Lower              | -0.24    | 0.02      | -9.83     | coefficient |
|                       | No influence Weak  | -4.91    | 0.07      | -71.39    | scale       |
|                       | Weak Moderate      | -3.15    | 0.03      | -103.15   | scale       |
|                       | Moderate Strong    | -1.00    | 0.02      | -64.10    | scale       |
|                       | Strong Very strong | 1.12     | 0.02      | 69.89     | scale       |
| gender                | Man                | -0.30    | 0.03      | -12.07    | coefficient |
|                       | Other/Undisclosed  | 0.10     | 0.17      | 0.60      | coefficient |
|                       | No influence Weak  | -4.93    | 0.07      | -71.62    | scale       |
|                       | Weak Moderate      | -3.16    | 0.03      | -103.75   | scale       |
|                       | Moderate Strong    | -1.01    | 0.02      | -65.61    | scale       |
| healthcare_experience | Strong Very strong | 1.11     | 0.02      | 70.49     | scale       |
|                       | Yes                | 0.33     | 0.02      | 14.24     | coefficient |
|                       | No influence Weak  | -4.72    | 0.07      | -68.63    | scale       |
|                       | Weak Moderate      | -2.95    | 0.03      | -97.17    | scale       |
|                       | Moderate Strong    | -0.80    | 0.02      | -50.56    | scale       |
| cognitive_health      | Strong Very strong | 1.32     | 0.02      | 76.48     | scale       |
|                       | Below average      | -0.39    | 0.05      | -8.06     | coefficient |
|                       | No influence Weak  | -4.86    | 0.07      | -71.06    | scale       |
|                       | Weak Moderate      | -3.10    | 0.03      | -104.69   | scale       |
|                       | Moderate Strong    | -0.95    | 0.01      | -68.82    | scale       |
| mental_health         | Strong Very strong | 1.17     | 0.01      | 80.55     | scale       |
|                       | Below average      | -0.20    | 0.03      | -5.93     | coefficient |
|                       | No influence Weak  | -4.86    | 0.07      | -70.99    | scale       |
|                       | Weak Moderate      | -3.10    | 0.03      | -104.07   | scale       |
|                       | Moderate Strong    | -0.95    | 0.01      | -67.03    | scale       |
|                       | Strong Very strong | 1.16     | 0.01      | 78.30     | scale       |
|                       | Yes                | -0.10    | 0.02      | -4.22     | coefficient |
|                       | No influence Weak  | -4.87    | 0.07      | -70.65    | scale       |
|                       | Weak Moderate      | -3.11    | 0.03      | -100.68   | scale       |
|                       | Moderate Strong    | -0.96    | 0.02      | -58.79    | scale       |



*(continued)*

| illness_experience           | term               | estimate | std.error | statistic | coef.type   |
|------------------------------|--------------------|----------|-----------|-----------|-------------|
|                              | Strong Very strong | 1.15     | 0.02      | 68.03     | scale       |
|                              | Yes                | 0.16     | 0.02      | 6.95      | coefficient |
|                              | No influence Weak  | -4.76    | 0.07      | -69.00    | scale       |
| brain_disease_caregiver      | Weak Moderate      | -3.00    | 0.03      | -96.71    | scale       |
|                              | Moderate Strong    | -0.85    | 0.02      | -50.28    | scale       |
|                              | Strong Very strong | 1.26     | 0.02      | 70.21     | scale       |
|                              | Yes                | 0.05     | 0.02      | 1.99      | coefficient |
|                              | No influence Weak  | -4.81    | 0.07      | -69.79    | scale       |
| brain_research_participation | Weak Moderate      | -3.05    | 0.03      | -98.69    | scale       |
|                              | Moderate Strong    | -0.90    | 0.02      | -54.50    | scale       |
|                              | Strong Very strong | 1.21     | 0.02      | 69.39     | scale       |
|                              | Stable             | -0.07    | 0.02      | -2.98     | coefficient |
|                              | No influence Weak  | -4.87    | 0.07      | -70.07    | scale       |
| relationship                 | Weak Moderate      | -3.11    | 0.03      | -96.85    | scale       |
|                              | Moderate Strong    | -0.96    | 0.02      | -51.70    | scale       |
|                              | Strong Very strong | 1.15     | 0.02      | 60.37     | scale       |

## 1.3.9 Question 1: ordinal - Education

| fct                   | term               | estimate | std.error | statistic | coef.type   |
|-----------------------|--------------------|----------|-----------|-----------|-------------|
| age                   | 41-60              | -0.04    | 0.02      | -1.78     | coefficient |
|                       | <= 40              | 0.23     | 0.03      | 7.05      | coefficient |
|                       | No influence Weak  | -4.09    | 0.05      | -83.03    | scale       |
|                       | Weak Moderate      | -2.40    | 0.03      | -95.97    | scale       |
|                       | Moderate Strong    | -0.41    | 0.02      | -24.25    | scale       |
|                       | Strong Very strong | 1.57     | 0.02      | 78.90     | scale       |
| education             | Lower              | -0.49    | 0.02      | -20.39    | coefficient |
|                       | No influence Weak  | -4.29    | 0.05      | -87.97    | scale       |
|                       | Weak Moderate      | -2.59    | 0.02      | -108.65   | scale       |
|                       | Moderate Strong    | -0.59    | 0.01      | -40.19    | scale       |
|                       | Strong Very strong | 1.41     | 0.02      | 82.11     | scale       |
| gender                | Man                | 0.10     | 0.02      | 3.93      | coefficient |
|                       | Other/Undisclosed  | 0.15     | 0.17      | 0.89      | coefficient |
|                       | No influence Weak  | -4.08    | 0.05      | -84.51    | scale       |
|                       | Weak Moderate      | -2.39    | 0.02      | -103.91   | scale       |
|                       | Moderate Strong    | -0.41    | 0.01      | -28.67    | scale       |
| healthcare_experience | Strong Very strong | 1.57     | 0.02      | 90.20     | scale       |
|                       | Yes                | 0.30     | 0.02      | 13.12     | coefficient |
|                       | No influence Weak  | -4.00    | 0.05      | -82.60    | scale       |
|                       | Weak Moderate      | -2.31    | 0.02      | -98.63    | scale       |
|                       | Moderate Strong    | -0.32    | 0.02      | -21.11    | scale       |
| cognitive_health      | Strong Very strong | 1.67     | 0.02      | 89.89     | scale       |
|                       | Below average      | -0.41    | 0.05      | -8.71     | coefficient |
|                       | No influence Weak  | -4.14    | 0.05      | -86.28    | scale       |
|                       | Weak Moderate      | -2.45    | 0.02      | -109.73   | scale       |
|                       | Moderate Strong    | -0.46    | 0.01      | -36.06    | scale       |
| mental_health         | Strong Very strong | 1.52     | 0.02      | 95.08     | scale       |
|                       | Below average      | -0.32    | 0.03      | -9.56     | coefficient |
|                       | No influence Weak  | -4.15    | 0.05      | -86.38    | scale       |
|                       | Weak Moderate      | -2.46    | 0.02      | -109.02   | scale       |
|                       | Moderate Strong    | -0.47    | 0.01      | -36.15    | scale       |
|                       | Strong Very strong | 1.51     | 0.02      | 92.50     | scale       |
|                       | Yes                | -0.10    | 0.02      | -4.43     | coefficient |
|                       | No influence Weak  | -4.15    | 0.05      | -85.13    | scale       |
|                       | Weak Moderate      | -2.46    | 0.02      | -102.68   | scale       |
|                       | Moderate Strong    | -0.47    | 0.02      | -30.73    | scale       |

*(continued)*

| illness_experience           | term               | estimate | std.error | statistic | coef.type   |
|------------------------------|--------------------|----------|-----------|-----------|-------------|
|                              | Strong Very strong | 1.51     | 0.02      | 82.88     | scale       |
|                              | Yes                | -0.10    | 0.02      | -4.28     | coefficient |
|                              | No influence Weak  | -4.15    | 0.05      | -84.76    | scale       |
| brain_disease_caregiver      | Weak Moderate      | -2.46    | 0.02      | -100.62   | scale       |
|                              | Moderate Strong    | -0.48    | 0.02      | -29.47    | scale       |
|                              | Strong Very strong | 1.50     | 0.02      | 79.77     | scale       |
|                              | Yes                | -0.02    | 0.02      | -1.10     | coefficient |
|                              | No influence Weak  | -4.12    | 0.05      | -84.39    | scale       |
| brain_research_participation | Weak Moderate      | -2.43    | 0.02      | -100.84   | scale       |
|                              | Moderate Strong    | -0.44    | 0.02      | -28.23    | scale       |
|                              | Strong Very strong | 1.54     | 0.02      | 82.74     | scale       |
|                              | Stable             | 0.00     | 0.02      | -0.16     | coefficient |
|                              | No influence Weak  | -4.11    | 0.05      | -83.15    | scale       |
| relationship                 | Weak Moderate      | -2.42    | 0.03      | -95.48    | scale       |
|                              | Moderate Strong    | -0.44    | 0.02      | -24.64    | scale       |
|                              | Strong Very strong | 1.54     | 0.02      | 76.24     | scale       |

## 1.3.10 Question 1: ordinal - Profession

| fct                   | term               | estimate | std.error | statistic | coef.type   |
|-----------------------|--------------------|----------|-----------|-----------|-------------|
| age                   | 41-60              | 0.17     | 0.02      | 7.01      | coefficient |
|                       | <= 40              | 0.38     | 0.03      | 11.75     | coefficient |
|                       | No influence Weak  | -3.75    | 0.04      | -85.03    | scale       |
|                       | Weak Moderate      | -2.17    | 0.02      | -91.21    | scale       |
|                       | Moderate Strong    | -0.11    | 0.02      | -6.35     | scale       |
|                       | Strong Very strong | 2.04     | 0.02      | 92.50     | scale       |
| education             | Lower              | -0.30    | 0.02      | -12.53    | coefficient |
|                       | No influence Weak  | -3.97    | 0.04      | -91.30    | scale       |
|                       | Weak Moderate      | -2.39    | 0.02      | -106.10   | scale       |
|                       | Moderate Strong    | -0.33    | 0.01      | -22.77    | scale       |
|                       | Strong Very strong | 1.82     | 0.02      | 94.52     | scale       |
| gender                | Man                | 0.14     | 0.02      | 5.56      | coefficient |
|                       | Other/Undisclosed  | 0.00     | 0.17      | 0.01      | coefficient |
|                       | No influence Weak  | -3.83    | 0.04      | -88.77    | scale       |
|                       | Weak Moderate      | -2.25    | 0.02      | -102.78   | scale       |
|                       | Moderate Strong    | -0.19    | 0.01      | -13.84    | scale       |
| healthcare_experience | Strong Very strong | 1.94     | 0.02      | 99.89     | scale       |
|                       | Yes                | 0.22     | 0.02      | 9.65      | coefficient |
|                       | No influence Weak  | -3.79    | 0.04      | -87.28    | scale       |
|                       | Weak Moderate      | -2.20    | 0.02      | -98.33    | scale       |
|                       | Moderate Strong    | -0.15    | 0.02      | -9.79     | scale       |
| cognitive_health      | Strong Very strong | 1.99     | 0.02      | 98.03     | scale       |
|                       | Below average      | -0.24    | 0.05      | -5.08     | coefficient |
|                       | No influence Weak  | -3.89    | 0.04      | -90.82    | scale       |
|                       | Weak Moderate      | -2.30    | 0.02      | -109.13   | scale       |
|                       | Moderate Strong    | -0.25    | 0.01      | -19.75    | scale       |
| mental_health         | Strong Very strong | 1.89     | 0.02      | 104.23    | scale       |
|                       | Below average      | -0.10    | 0.03      | -3.13     | coefficient |
|                       | No influence Weak  | -3.88    | 0.04      | -90.52    | scale       |
|                       | Weak Moderate      | -2.30    | 0.02      | -107.74   | scale       |
|                       | Moderate Strong    | -0.25    | 0.01      | -19.05    | scale       |
|                       | Strong Very strong | 1.89     | 0.02      | 102.62    | scale       |
|                       | Yes                | -0.05    | 0.02      | -2.17     | coefficient |
|                       | No influence Weak  | -3.89    | 0.04      | -89.08    | scale       |
|                       | Weak Moderate      | -2.31    | 0.02      | -101.00   | scale       |
|                       | Moderate Strong    | -0.25    | 0.02      | -16.56    | scale       |

*(continued)*

| illness_experience           | term               | estimate | std.error | statistic | coef.type   |
|------------------------------|--------------------|----------|-----------|-----------|-------------|
|                              | Strong Very strong | 1.88     | 0.02      | 93.76     | scale       |
|                              | Yes                | -0.13    | 0.02      | -6.01     | coefficient |
|                              | No influence Weak  | -3.93    | 0.04      | -89.36    | scale       |
| brain_disease_caregiver      | Weak Moderate      | -2.35    | 0.02      | -100.01   | scale       |
|                              | Moderate Strong    | -0.30    | 0.02      | -18.37    | scale       |
|                              | Strong Very strong | 1.84     | 0.02      | 89.51     | scale       |
|                              | Yes                | -0.15    | 0.02      | -6.56     | coefficient |
|                              | No influence Weak  | -3.94    | 0.04      | -89.70    | scale       |
| brain_research_participation | Weak Moderate      | -2.35    | 0.02      | -101.27   | scale       |
|                              | Moderate Strong    | -0.30    | 0.02      | -18.97    | scale       |
|                              | Strong Very strong | 1.84     | 0.02      | 91.00     | scale       |
|                              | Stable             | -0.05    | 0.02      | -2.04     | coefficient |
|                              | No influence Weak  | -3.90    | 0.04      | -87.51    | scale       |
| relationship                 | Weak Moderate      | -2.31    | 0.02      | -94.65    | scale       |
|                              | Moderate Strong    | -0.26    | 0.02      | -14.70    | scale       |
|                              | Strong Very strong | 1.88     | 0.02      | 85.81     | scale       |

## 1.3.11 Question 1: ordinal - Income

| fct                   | term               | estimate | std.error | statistic | coef.type   |
|-----------------------|--------------------|----------|-----------|-----------|-------------|
| age                   | 41-60              | -0.04    | 0.02      | -1.51     | coefficient |
|                       | <= 40              | -0.28    | 0.03      | -8.55     | coefficient |
|                       | No influence Weak  | -3.26    | 0.03      | -97.38    | scale       |
|                       | Weak Moderate      | -1.47    | 0.02      | -75.43    | scale       |
|                       | Moderate Strong    | 0.53     | 0.02      | 30.57     | scale       |
|                       | Strong Very strong | 2.67     | 0.03      | 96.51     | scale       |
| education             | Lower              | 0.09     | 0.02      | 3.53      | coefficient |
|                       | No influence Weak  | -3.17    | 0.03      | -99.43    | scale       |
|                       | Weak Moderate      | -1.38    | 0.02      | -82.25    | scale       |
|                       | Moderate Strong    | 0.61     | 0.01      | 41.51     | scale       |
|                       | Strong Very strong | 2.75     | 0.03      | 104.64    | scale       |
| gender                | Man                | -0.12    | 0.02      | -4.63     | coefficient |
|                       | Other/Undisclosed  | 0.18     | 0.17      | 1.02      | coefficient |
|                       | No influence Weak  | -3.23    | 0.03      | -101.07   | scale       |
|                       | Weak Moderate      | -1.44    | 0.02      | -85.65    | scale       |
|                       | Moderate Strong    | 0.55     | 0.01      | 38.47     | scale       |
| healthcare_experience | Strong Very strong | 2.69     | 0.03      | 103.57    | scale       |
|                       | Yes                | 0.29     | 0.02      | 12.48     | coefficient |
|                       | No influence Weak  | -3.09    | 0.03      | -96.53    | scale       |
|                       | Weak Moderate      | -1.31    | 0.02      | -75.46    | scale       |
|                       | Moderate Strong    | 0.70     | 0.02      | 44.57     | scale       |
| cognitive_health      | Strong Very strong | 2.84     | 0.03      | 105.35    | scale       |
|                       | Below average      | -0.10    | 0.05      | -2.11     | coefficient |
|                       | No influence Weak  | -3.20    | 0.03      | -102.60   | scale       |
|                       | Weak Moderate      | -1.42    | 0.02      | -91.57    | scale       |
|                       | Moderate Strong    | 0.58     | 0.01      | 44.84     | scale       |
| mental_health         | Strong Very strong | 2.72     | 0.03      | 107.62    | scale       |
|                       | Below average      | -0.06    | 0.03      | -1.68     | coefficient |
|                       | No influence Weak  | -3.20    | 0.03      | -102.06   | scale       |
|                       | Weak Moderate      | -1.42    | 0.02      | -89.62    | scale       |
|                       | Moderate Strong    | 0.58     | 0.01      | 43.36     | scale       |
|                       | Strong Very strong | 2.72     | 0.03      | 106.69    | scale       |
|                       | Yes                | 0.12     | 0.02      | 5.38      | coefficient |
|                       | No influence Weak  | -3.15    | 0.03      | -97.61    | scale       |
|                       | Weak Moderate      | -1.36    | 0.02      | -77.60    | scale       |
|                       | Moderate Strong    | 0.63     | 0.02      | 40.48     | scale       |

*(continued)*

| fct                          | term               | estimate | std.error | statistic | coef.type   |
|------------------------------|--------------------|----------|-----------|-----------|-------------|
| illness_experience           | Strong Very strong | 2.77     | 0.03      | 103.25    | scale       |
|                              | Yes                | 0.04     | 0.02      | 1.64      | coefficient |
|                              | No influence Weak  | -3.18    | 0.03      | -97.19    | scale       |
|                              | Weak Moderate      | -1.39    | 0.02      | -75.89    | scale       |
|                              | Moderate Strong    | 0.60     | 0.02      | 36.65     | scale       |
| brain_disease_caregiver      | Strong Very strong | 2.74     | 0.03      | 100.66    | scale       |
|                              | Yes                | 0.05     | 0.02      | 2.08      | coefficient |
|                              | No influence Weak  | -3.18    | 0.03      | -97.71    | scale       |
|                              | Weak Moderate      | -1.39    | 0.02      | -77.24    | scale       |
|                              | Moderate Strong    | 0.60     | 0.02      | 37.77     | scale       |
| brain_research_participation | Strong Very strong | 2.74     | 0.03      | 101.65    | scale       |
|                              | Stable             | 0.00     | 0.02      | 0.11      | coefficient |
|                              | No influence Weak  | -3.19    | 0.03      | -95.36    | scale       |
|                              | Weak Moderate      | -1.41    | 0.02      | -71.44    | scale       |
|                              | Moderate Strong    | 0.58     | 0.02      | 32.81     | scale       |
| relationship                 | Strong Very strong | 2.72     | 0.03      | 97.03     | scale       |

## 1.4 Comparison binary and continuous model results

### 1.4.1 Question 1: bin\_vs\_cont - Substance use

| fct                          | Binary |          |           |           |         | Continuous |       |           |           |         |
|------------------------------|--------|----------|-----------|-----------|---------|------------|-------|-----------|-----------|---------|
|                              | term   | log_odds | std.error | statistic | p.value | term       | beta  | std.error | statistic | p.value |
| brain_research_participation | Yes    | 0        | 0.05      | 0.09      | 0.93    | Yes        | -0.02 | 0.01      | -2        | 0.05    |

### 1.4.2 Question 1: bin\_vs\_cont - Sleeping habits

| fct              | Binary        |          |           |           |         | Continuous    |      |           |           |         |
|------------------|---------------|----------|-----------|-----------|---------|---------------|------|-----------|-----------|---------|
|                  | term          | log_odds | std.error | statistic | p.value | term          | beta | std.error | statistic | p.value |
| cognitive_health | Below average | -0.08    | 0.07      | -1.21     | 0.23    | Below average | 0.02 | 0.02      | 1.28      | 0.2     |

### 1.4.3 Question 1: bin\_vs\_cont - Life goals

| fct          | Binary |          |           |           |         | Continuous |       |           |           |         |
|--------------|--------|----------|-----------|-----------|---------|------------|-------|-----------|-----------|---------|
|              | term   | log_odds | std.error | statistic | p.value | term       | beta  | std.error | statistic | p.value |
| age          | 41-60  | -0.05    | 0.03      | -1.73     | 0.08    | 41-60      | 0.01  | 0.01      | 0.49      | 0.62    |
| relationship | Stable | 0.01     | 0.03      | 0.45      | 0.65    | Stable     | -0.01 | 0.01      | -0.93     | 0.35    |

## 1.4.4 Question 1: bin\_vs\_cont - Diet

| fct    | Binary            |          |           |           |         | Continuous        |      |           |           |         |
|--------|-------------------|----------|-----------|-----------|---------|-------------------|------|-----------|-----------|---------|
|        | term              | log_odds | std.error | statistic | p.value | term              | beta | std.error | statistic | p.value |
| gender | Other/Undisclosed | -0.06    | 0.2       | -0.32     | 0.75    | Other/Undisclosed | 0.05 | 0.07      | 0.65      | 0.51    |

## 1.4.5 Question 1: bin\_vs\_cont - Education

| fct          | Binary |          |           |           |         | Continuous |      |           |           |         |
|--------------|--------|----------|-----------|-----------|---------|------------|------|-----------|-----------|---------|
|              | term   | log_odds | std.error | statistic | p.value | term       | beta | std.error | statistic | p.value |
| relationship | Stable | 0.03     | 0.02      | 1.03      | 0.3     | Stable     | 0    | 0.01      | -0.14     | 0.89    |

## 1.4.6 Question 1: bin\_vs\_cont - Income

| fct              | Binary        |          |           |           |         | Continuous    |       |           |           |         |
|------------------|---------------|----------|-----------|-----------|---------|---------------|-------|-----------|-----------|---------|
|                  | term          | log_odds | std.error | statistic | p.value | term          | beta  | std.error | statistic | p.value |
| cognitive_health | Below average | 0.04     | 0.05      | 0.74      | 0.46    | Below average | -0.06 | 0.02      | -2.64     | 0.01    |
| mental_health    | Below average | 0.00     | 0.04      | 0.07      | 0.94    | Below average | -0.03 | 0.02      | -1.74     | 0.08    |
| relationship     | Stable        | 0.00     | 0.03      | -0.05     | 0.96    | Stable        | 0.00  | 0.01      | 0.09      | 0.93    |



## 2 Question 2

### 2.1 Continuous models

For peer review only

## 2.1.1 Question 2: continuous - In the womb

| fct                          | term              | estimate | std.error | statistic | p.value |
|------------------------------|-------------------|----------|-----------|-----------|---------|
|                              | (Intercept)       | 3.25     | 0.01      | 424.60    | 0.00    |
| age                          | 41-60             | 0.17     | 0.01      | 14.54     | 0.00    |
|                              | <= 40             | 0.18     | 0.01      | 12.24     | 0.00    |
| education                    | (Intercept)       | 3.41     | 0.01      | 546.44    | 0.00    |
|                              | Lower             | -0.22    | 0.01      | -19.76    | 0.00    |
| gender                       | (Intercept)       | 3.40     | 0.01      | 554.77    | 0.00    |
|                              | Man               | -0.22    | 0.01      | -18.76    | 0.00    |
|                              | Other/Undisclosed | 0.03     | 0.08      | 0.33      | 0.74    |
| healthcare_experience        | (Intercept)       | 3.25     | 0.01      | 492.92    | 0.00    |
|                              | Yes               | 0.24     | 0.01      | 22.48     | 0.00    |
| cognitive_health             | (Intercept)       | 3.35     | 0.01      | 624.96    | 0.00    |
|                              | Below average     | -0.20    | 0.02      | -9.35     | 0.00    |
| mental_health                | (Intercept)       | 3.34     | 0.01      | 597.91    | 0.00    |
|                              | Below average     | -0.02    | 0.02      | -1.30     | 0.19    |
| illness_experience           | (Intercept)       | 3.34     | 0.01      | 495.49    | 0.00    |
|                              | Yes               | 0.00     | 0.01      | -0.20     | 0.84    |
| brain_disease_caregiver      | (Intercept)       | 3.30     | 0.01      | 464.18    | 0.00    |
|                              | Yes               | 0.08     | 0.01      | 7.59      | 0.00    |
| brain_research_participation | (Intercept)       | 3.34     | 0.01      | 482.93    | 0.00    |
|                              | Yes               | 0.00     | 0.01      | 0.42      | 0.67    |
| relationship                 | (Intercept)       | 3.33     | 0.01      | 424.85    | 0.00    |
|                              | Stable            | 0.01     | 0.01      | 1.40      | 0.16    |

## 2.1.2 Question 2: continuous - Childhood

| fct                          | term              | estimate | std.error | statistic | p.value |
|------------------------------|-------------------|----------|-----------|-----------|---------|
|                              | (Intercept)       | 3.59     | 0.01      | 685.25    | 0.00    |
| age                          | 41-60             | 0.12     | 0.01      | 15.09     | 0.00    |
|                              | <= 40             | 0.18     | 0.01      | 17.75     | 0.00    |
| education                    | (Intercept)       | 3.70     | 0.00      | 859.50    | 0.00    |
|                              | Lower             | -0.11    | 0.01      | -14.84    | 0.00    |
| gender                       | (Intercept)       | 3.69     | 0.00      | 871.25    | 0.00    |
|                              | Man               | -0.09    | 0.01      | -11.39    | 0.00    |
|                              | Other/Undisclosed | 0.04     | 0.05      | 0.80      | 0.42    |
| healthcare_experience        | (Intercept)       | 3.62     | 0.00      | 795.47    | 0.00    |
|                              | Yes               | 0.11     | 0.01      | 15.41     | 0.00    |
| cognitive_health             | (Intercept)       | 3.67     | 0.00      | 994.69    | 0.00    |
|                              | Below average     | -0.12    | 0.02      | -7.83     | 0.00    |
| mental_health                | (Intercept)       | 3.66     | 0.00      | 952.42    | 0.00    |
|                              | Below average     | 0.02     | 0.01      | 2.17      | 0.03    |
| illness_experience           | (Intercept)       | 3.66     | 0.00      | 790.22    | 0.00    |
|                              | Yes               | 0.00     | 0.01      | -0.36     | 0.72    |
| brain_disease_caregiver      | (Intercept)       | 3.66     | 0.00      | 748.43    | 0.00    |
|                              | Yes               | 0.00     | 0.01      | -0.41     | 0.68    |
| brain_research_participation | (Intercept)       | 3.67     | 0.00      | 772.67    | 0.00    |
|                              | Yes               | -0.02    | 0.01      | -2.64     | 0.01    |
| relationship                 | (Intercept)       | 3.67     | 0.01      | 681.02    | 0.00    |
|                              | Stable            | -0.02    | 0.01      | -2.31     | 0.02    |

## 2.1.3 Question 2: continuous - Adolescence

| fct                          | term              | estimate | std.error | statistic | p.value |
|------------------------------|-------------------|----------|-----------|-----------|---------|
|                              | (Intercept)       | 3.60     | 0.00      | 739.48    | 0.00    |
| age                          | 41-60             | 0.10     | 0.01      | 13.91     | 0.00    |
|                              | <= 40             | 0.16     | 0.01      | 16.49     | 0.00    |
| education                    | (Intercept)       | 3.68     | 0.00      | 919.07    | 0.00    |
|                              | Lower             | -0.06    | 0.01      | -9.00     | 0.00    |
| gender                       | (Intercept)       | 3.69     | 0.00      | 938.03    | 0.00    |
|                              | Man               | -0.09    | 0.01      | -12.11    | 0.00    |
|                              | Other/Undisclosed | 0.05     | 0.05      | 0.94      | 0.35    |
| healthcare_experience        | (Intercept)       | 3.63     | 0.00      | 857.58    | 0.00    |
|                              | Yes               | 0.09     | 0.01      | 13.28     | 0.00    |
| cognitive_health             | (Intercept)       | 3.67     | 0.00      | 1070.09   | 0.00    |
|                              | Below average     | -0.09    | 0.01      | -6.42     | 0.00    |
| mental_health                | (Intercept)       | 3.66     | 0.00      | 1025.39   | 0.00    |
|                              | Below average     | 0.02     | 0.01      | 2.32      | 0.02    |
| illness_experience           | (Intercept)       | 3.66     | 0.00      | 849.83    | 0.00    |
|                              | Yes               | 0.01     | 0.01      | 1.19      | 0.24    |
| brain_disease_caregiver      | (Intercept)       | 3.66     | 0.00      | 805.15    | 0.00    |
|                              | Yes               | 0.00     | 0.01      | 0.66      | 0.51    |
| brain_research_participation | (Intercept)       | 3.66     | 0.00      | 829.97    | 0.00    |
|                              | Yes               | 0.00     | 0.01      | 0.09      | 0.93    |
| relationship                 | (Intercept)       | 3.68     | 0.01      | 734.28    | 0.00    |
|                              | Stable            | -0.03    | 0.01      | -3.75     | 0.00    |

## 2.1.4 Question 2: continuous - Young adulthood

| fct                          | term              | estimate | std.error | statistic | p.value |
|------------------------------|-------------------|----------|-----------|-----------|---------|
|                              | (Intercept)       | 3.51     | 0.01      | 670.76    | 0.00    |
| age                          | 41-60             | 0.07     | 0.01      | 9.61      | 0.00    |
|                              | <= 40             | 0.07     | 0.01      | 7.29      | 0.00    |
| education                    | (Intercept)       | 3.55     | 0.00      | 827.66    | 0.00    |
|                              | Lower             | -0.01    | 0.01      | -1.85     | 0.06    |
| gender                       | (Intercept)       | 3.58     | 0.00      | 853.74    | 0.00    |
|                              | Man               | -0.12    | 0.01      | -15.84    | 0.00    |
|                              | Other/Undisclosed | -0.05    | 0.05      | -1.03     | 0.30    |
| healthcare_experience        | (Intercept)       | 3.51     | 0.00      | 775.81    | 0.00    |
|                              | Yes               | 0.09     | 0.01      | 12.85     | 0.00    |
| cognitive_health             | (Intercept)       | 3.55     | 0.00      | 968.01    | 0.00    |
|                              | Below average     | -0.05    | 0.01      | -3.67     | 0.00    |
| mental_health                | (Intercept)       | 3.55     | 0.00      | 929.45    | 0.00    |
|                              | Below average     | -0.01    | 0.01      | -0.63     | 0.53    |
| illness_experience           | (Intercept)       | 3.53     | 0.00      | 767.77    | 0.00    |
|                              | Yes               | 0.03     | 0.01      | 4.43      | 0.00    |
| brain_disease_caregiver      | (Intercept)       | 3.52     | 0.00      | 725.02    | 0.00    |
|                              | Yes               | 0.05     | 0.01      | 7.39      | 0.00    |
| brain_research_participation | (Intercept)       | 3.54     | 0.00      | 749.48    | 0.00    |
|                              | Yes               | 0.02     | 0.01      | 2.78      | 0.01    |
| relationship                 | (Intercept)       | 3.55     | 0.01      | 662.83    | 0.00    |
|                              | Stable            | 0.00     | 0.01      | -0.67     | 0.51    |

## 2.1.5 Question 2: continuous - Middle age

| fct                          | term              | estimate | std.error | statistic | p.value |
|------------------------------|-------------------|----------|-----------|-----------|---------|
|                              | (Intercept)       | 3.56     | 0.01      | 700.08    | 0.00    |
| age                          | 41-60             | 0.10     | 0.01      | 12.88     | 0.00    |
|                              | <= 40             | -0.01    | 0.01      | -0.84     | 0.40    |
| education                    | (Intercept)       | 3.60     | 0.00      | 860.58    | 0.00    |
|                              | Lower             | -0.01    | 0.01      | -1.73     | 0.08    |
| gender                       | (Intercept)       | 3.65     | 0.00      | 893.54    | 0.00    |
|                              | Man               | -0.16    | 0.01      | -20.93    | 0.00    |
|                              | Other/Undisclosed | -0.17    | 0.05      | -3.23     | 0.00    |
| healthcare_experience        | (Intercept)       | 3.57     | 0.00      | 808.12    | 0.00    |
|                              | Yes               | 0.07     | 0.01      | 9.33      | 0.00    |
| cognitive_health             | (Intercept)       | 3.60     | 0.00      | 1006.69   | 0.00    |
|                              | Below average     | -0.05    | 0.01      | -3.65     | 0.00    |
| mental_health                | (Intercept)       | 3.60     | 0.00      | 967.35    | 0.00    |
|                              | Below average     | -0.02    | 0.01      | -2.40     | 0.02    |
| illness_experience           | (Intercept)       | 3.59     | 0.00      | 799.55    | 0.00    |
|                              | Yes               | 0.02     | 0.01      | 2.48      | 0.01    |
| brain_disease_caregiver      | (Intercept)       | 3.56     | 0.00      | 751.82    | 0.00    |
|                              | Yes               | 0.09     | 0.01      | 13.03     | 0.00    |
| brain_research_participation | (Intercept)       | 3.59     | 0.00      | 778.77    | 0.00    |
|                              | Yes               | 0.03     | 0.01      | 4.17      | 0.00    |
| relationship                 | (Intercept)       | 3.59     | 0.01      | 686.89    | 0.00    |
|                              | Stable            | 0.02     | 0.01      | 2.54      | 0.01    |

### 2.1.6 Question 2: continuous - Old age

| fct                          | term              | estimate | std.error | statistic | p.value |
|------------------------------|-------------------|----------|-----------|-----------|---------|
|                              | (Intercept)       | 3.69     | 0.00      | 745.06    | 0.00    |
| age                          | 41-60             | 0.01     | 0.01      | 1.40      | 0.16    |
|                              | <= 40             | -0.09    | 0.01      | -9.28     | 0.00    |
| education                    | (Intercept)       | 3.70     | 0.00      | 907.70    | 0.00    |
|                              | Lower             | -0.04    | 0.01      | -5.44     | 0.00    |
| gender                       | (Intercept)       | 3.72     | 0.00      | 933.78    | 0.00    |
|                              | Man               | -0.12    | 0.01      | -16.04    | 0.00    |
|                              | Other/Undisclosed | -0.17    | 0.05      | -3.32     | 0.00    |
| healthcare_experience        | (Intercept)       | 3.67     | 0.00      | 852.14    | 0.00    |
|                              | Yes               | 0.04     | 0.01      | 5.57      | 0.00    |
| cognitive_health             | (Intercept)       | 3.69     | 0.00      | 1059.06   | 0.00    |
|                              | Below average     | -0.05    | 0.01      | -3.63     | 0.00    |
| mental_health                | (Intercept)       | 3.69     | 0.00      | 1018.63   | 0.00    |
|                              | Below average     | -0.04    | 0.01      | -4.24     | 0.00    |
| illness_experience           | (Intercept)       | 3.68     | 0.00      | 841.89    | 0.00    |
|                              | Yes               | 0.01     | 0.01      | 1.63      | 0.10    |
| brain_disease_caregiver      | (Intercept)       | 3.65     | 0.00      | 792.71    | 0.00    |
|                              | Yes               | 0.06     | 0.01      | 9.54      | 0.00    |
| brain_research_participation | (Intercept)       | 3.66     | 0.00      | 818.20    | 0.00    |
|                              | Yes               | 0.05     | 0.01      | 6.83      | 0.00    |
| relationship                 | (Intercept)       | 3.67     | 0.01      | 722.10    | 0.00    |
|                              | Stable            | 0.02     | 0.01      | 3.53      | 0.00    |

## 2.2 Binary models

## 2.2.1 Question 2: binary - In the womb

| fct                          | term              | estimate | std.error | statistic | p.value |
|------------------------------|-------------------|----------|-----------|-----------|---------|
|                              | (Intercept)       | 1.43     | 0.02      | 63.24     | 0.00    |
| age                          | 41-60             | 0.40     | 0.04      | 10.94     | 0.00    |
|                              | <= 40             | 0.39     | 0.05      | 8.04      | 0.00    |
| education                    | (Intercept)       | 1.82     | 0.02      | 86.26     | 0.00    |
|                              | Lower             | -0.52    | 0.03      | -15.42    | 0.00    |
| gender                       | (Intercept)       | 1.81     | 0.02      | 87.70     | 0.00    |
|                              | Man               | -0.54    | 0.03      | -15.83    | 0.00    |
|                              | Other/Undisclosed | 0.04     | 0.26      | 0.15      | 0.88    |
| healthcare_experience        | (Intercept)       | 1.42     | 0.02      | 72.64     | 0.00    |
|                              | Yes               | 0.65     | 0.04      | 17.78     | 0.00    |
| cognitive_health             | (Intercept)       | 1.67     | 0.02      | 97.64     | 0.00    |
|                              | Below average     | -0.51    | 0.06      | -8.47     | 0.00    |
| mental_health                | (Intercept)       | 1.65     | 0.02      | 93.42     | 0.00    |
|                              | Below average     | -0.14    | 0.05      | -3.00     | 0.00    |
| illness_experience           | (Intercept)       | 1.64     | 0.02      | 77.25     | 0.00    |
|                              | Yes               | -0.02    | 0.03      | -0.65     | 0.52    |
| brain_disease_caregiver      | (Intercept)       | 1.53     | 0.02      | 70.58     | 0.00    |
|                              | Yes               | 0.24     | 0.03      | 7.35      | 0.00    |
| brain_research_participation | (Intercept)       | 1.65     | 0.02      | 75.48     | 0.00    |
|                              | Yes               | -0.03    | 0.03      | -1.05     | 0.29    |
| relationship                 | (Intercept)       | 1.60     | 0.02      | 65.62     | 0.00    |
|                              | Stable            | 0.06     | 0.03      | 1.88      | 0.06    |



## 2.2.2 Question 2: binary - Childhood

| fct                          | term              | estimate | std.error | statistic | p.value |
|------------------------------|-------------------|----------|-----------|-----------|---------|
|                              | (Intercept)       | 2.65     | 0.04      | 73.93     | 0.00    |
| age                          | 41-60             | 0.57     | 0.06      | 9.17      | 0.00    |
|                              | <= 40             | 0.64     | 0.09      | 7.26      | 0.00    |
| education                    | (Intercept)       | 3.13     | 0.04      | 86.00     | 0.00    |
|                              | Lower             | -0.56    | 0.06      | -9.99     | 0.00    |
| gender                       | (Intercept)       | 3.10     | 0.04      | 87.94     | 0.00    |
|                              | Man               | -0.52    | 0.06      | -9.23     | 0.00    |
|                              | Other/Undisclosed | -0.12    | 0.42      | -0.28     | 0.78    |
| healthcare_experience        | (Intercept)       | 2.70     | 0.03      | 85.08     | 0.00    |
|                              | Yes               | 0.72     | 0.06      | 11.26     | 0.00    |
| cognitive_health             | (Intercept)       | 2.97     | 0.03      | 102.68    | 0.00    |
|                              | Below average     | -0.58    | 0.09      | -6.21     | 0.00    |
| mental_health                | (Intercept)       | 2.93     | 0.03      | 99.12     | 0.00    |
|                              | Below average     | -0.04    | 0.08      | -0.46     | 0.65    |
| illness_experience           | (Intercept)       | 2.96     | 0.04      | 81.90     | 0.00    |
|                              | Yes               | -0.08    | 0.06      | -1.48     | 0.14    |
| brain_disease_caregiver      | (Intercept)       | 2.92     | 0.04      | 77.91     | 0.00    |
|                              | Yes               | 0.02     | 0.06      | 0.29      | 0.77    |
| brain_research_participation | (Intercept)       | 2.96     | 0.04      | 79.93     | 0.00    |
|                              | Yes               | -0.07    | 0.06      | -1.31     | 0.19    |
| relationship                 | (Intercept)       | 2.98     | 0.04      | 70.24     | 0.00    |
|                              | Stable            | -0.10    | 0.06      | -1.76     | 0.08    |

## 2.2.3 Question 2: binary - Adolescence

| fct                          | term              | estimate | std.error | statistic | p.value |
|------------------------------|-------------------|----------|-----------|-----------|---------|
|                              | (Intercept)       | 3.06     | 0.04      | 71.14     | 0.00    |
| age                          | 41-60             | 0.54     | 0.07      | 7.18      | 0.00    |
|                              | <= 40             | 0.76     | 0.11      | 6.79      | 0.00    |
| education                    | (Intercept)       | 3.49     | 0.04      | 81.21     | 0.00    |
|                              | Lower             | -0.40    | 0.07      | -5.93     | 0.00    |
| gender                       | (Intercept)       | 3.47     | 0.04      | 82.93     | 0.00    |
|                              | Man               | -0.39    | 0.07      | -5.59     | 0.00    |
|                              | Other/Undisclosed | -0.29    | 0.46      | -0.64     | 0.52    |
| healthcare_experience        | (Intercept)       | 3.15     | 0.04      | 81.08     | 0.00    |
|                              | Yes               | 0.58     | 0.08      | 7.74      | 0.00    |
| cognitive_health             | (Intercept)       | 3.40     | 0.04      | 96.48     | 0.00    |
|                              | Below average     | -0.69    | 0.11      | -6.44     | 0.00    |
| mental_health                | (Intercept)       | 3.36     | 0.04      | 93.38     | 0.00    |
|                              | Below average     | -0.11    | 0.09      | -1.16     | 0.25    |
| illness_experience           | (Intercept)       | 3.35     | 0.04      | 77.56     | 0.00    |
|                              | Yes               | -0.01    | 0.07      | -0.12     | 0.91    |
| brain_disease_caregiver      | (Intercept)       | 3.34     | 0.05      | 73.49     | 0.00    |
|                              | Yes               | 0.00     | 0.07      | -0.02     | 0.98    |
| brain_research_participation | (Intercept)       | 3.36     | 0.04      | 75.48     | 0.00    |
|                              | Yes               | -0.05    | 0.07      | -0.68     | 0.50    |
| relationship                 | (Intercept)       | 3.42     | 0.05      | 65.86     | 0.00    |
|                              | Stable            | -0.13    | 0.07      | -1.96     | 0.05    |

## 2.2.4 Question 2: binary - Young adulthood

| fct                          | term              | estimate | std.error | statistic | p.value |
|------------------------------|-------------------|----------|-----------|-----------|---------|
|                              | (Intercept)       | 2.85     | 0.04      | 72.82     | 0.00    |
| age                          | 41-60             | 0.46     | 0.07      | 6.98      | 0.00    |
|                              | <= 40             | 0.19     | 0.08      | 2.35      | 0.02    |
| education                    | (Intercept)       | 3.02     | 0.03      | 87.28     | 0.00    |
|                              | Lower             | 0.05     | 0.06      | 0.86      | 0.39    |
| gender                       | (Intercept)       | 3.24     | 0.04      | 86.19     | 0.00    |
|                              | Man               | -0.58    | 0.06      | -9.85     | 0.00    |
|                              | Other/Undisclosed | -0.68    | 0.35      | -1.96     | 0.05    |
| healthcare_experience        | (Intercept)       | 2.88     | 0.03      | 83.82     | 0.00    |
|                              | Yes               | 0.47     | 0.06      | 7.38      | 0.00    |
| cognitive_health             | (Intercept)       | 3.07     | 0.03      | 101.50    | 0.00    |
|                              | Below average     | -0.42    | 0.10      | -4.08     | 0.00    |
| mental_health                | (Intercept)       | 3.06     | 0.03      | 97.59     | 0.00    |
|                              | Below average     | -0.19    | 0.08      | -2.36     | 0.02    |
| illness_experience           | (Intercept)       | 2.99     | 0.04      | 81.65     | 0.00    |
|                              | Yes               | 0.12     | 0.06      | 2.07      | 0.04    |
| brain_disease_caregiver      | (Intercept)       | 2.94     | 0.04      | 77.70     | 0.00    |
|                              | Yes               | 0.21     | 0.06      | 3.63      | 0.00    |
| brain_research_participation | (Intercept)       | 3.06     | 0.04      | 78.97     | 0.00    |
|                              | Yes               | -0.04    | 0.06      | -0.77     | 0.44    |
| relationship                 | (Intercept)       | 3.00     | 0.04      | 70.12     | 0.00    |
|                              | Stable            | 0.07     | 0.06      | 1.19      | 0.23    |

## 2.2.5 Question 2: binary - Middle age

| fct                          | term              | estimate | std.error | statistic | p.value |
|------------------------------|-------------------|----------|-----------|-----------|---------|
|                              | (Intercept)       | 3.01     | 0.04      | 71.66     | 0.00    |
| age                          | 41-60             | 0.52     | 0.07      | 7.17      | 0.00    |
|                              | <= 40             | -0.20    | 0.08      | -2.57     | 0.01    |
| education                    | (Intercept)       | 3.16     | 0.04      | 85.70     | 0.00    |
|                              | Lower             | -0.08    | 0.06      | -1.20     | 0.23    |
| gender                       | (Intercept)       | 3.48     | 0.04      | 82.85     | 0.00    |
|                              | Man               | -0.89    | 0.06      | -14.53    | 0.00    |
|                              | Other/Undisclosed | -1.41    | 0.29      | -4.91     | 0.00    |
| healthcare_experience        | (Intercept)       | 2.99     | 0.04      | 82.84     | 0.00    |
|                              | Yes               | 0.43     | 0.07      | 6.47      | 0.00    |
| cognitive_health             | (Intercept)       | 3.17     | 0.03      | 100.16    | 0.00    |
|                              | Below average     | -0.43    | 0.11      | -3.98     | 0.00    |
| mental_health                | (Intercept)       | 3.19     | 0.03      | 95.93     | 0.00    |
|                              | Below average     | -0.36    | 0.08      | -4.49     | 0.00    |
| illness_experience           | (Intercept)       | 3.09     | 0.04      | 80.68     | 0.00    |
|                              | Yes               | 0.13     | 0.06      | 2.02      | 0.04    |
| brain_disease_caregiver      | (Intercept)       | 2.96     | 0.04      | 77.62     | 0.00    |
|                              | Yes               | 0.43     | 0.06      | 6.89      | 0.00    |
| brain_research_participation | (Intercept)       | 3.12     | 0.04      | 78.37     | 0.00    |
|                              | Yes               | 0.04     | 0.06      | 0.73      | 0.46    |
| relationship                 | (Intercept)       | 3.08     | 0.04      | 69.46     | 0.00    |
|                              | Stable            | 0.11     | 0.06      | 1.79      | 0.07    |

### 2.2.6 Question 2: binary - Old age

| fct                          | term              | estimate | std.error | statistic | p.value |
|------------------------------|-------------------|----------|-----------|-----------|---------|
|                              | (Intercept)       | 3.23     | 0.05      | 69.57     | 0.00    |
| age                          | 41-60             | 0.17     | 0.07      | 2.35      | 0.02    |
|                              | <= 40             | -0.60    | 0.08      | -7.93     | 0.00    |
| education                    | (Intercept)       | 3.24     | 0.04      | 84.73     | 0.00    |
|                              | Lower             | -0.23    | 0.06      | -3.60     | 0.00    |
| gender                       | (Intercept)       | 3.50     | 0.04      | 82.59     | 0.00    |
|                              | Man               | -0.88    | 0.06      | -14.25    | 0.00    |
|                              | Other/Undisclosed | -1.05    | 0.33      | -3.17     | 0.00    |
| healthcare_experience        | (Intercept)       | 3.04     | 0.04      | 82.38     | 0.00    |
|                              | Yes               | 0.35     | 0.07      | 5.26      | 0.00    |
| cognitive_health             | (Intercept)       | 3.19     | 0.03      | 99.83     | 0.00    |
|                              | Below average     | -0.42    | 0.11      | -3.87     | 0.00    |
| mental_health                | (Intercept)       | 3.23     | 0.03      | 95.43     | 0.00    |
|                              | Below average     | -0.43    | 0.08      | -5.41     | 0.00    |
| illness_experience           | (Intercept)       | 3.12     | 0.04      | 80.34     | 0.00    |
|                              | Yes               | 0.10     | 0.06      | 1.59      | 0.11    |
| brain_disease_caregiver      | (Intercept)       | 3.02     | 0.04      | 77.11     | 0.00    |
|                              | Yes               | 0.34     | 0.06      | 5.48      | 0.00    |
| brain_research_participation | (Intercept)       | 3.09     | 0.04      | 78.74     | 0.00    |
|                              | Yes               | 0.19     | 0.06      | 2.97      | 0.00    |
| relationship                 | (Intercept)       | 3.06     | 0.04      | 69.64     | 0.00    |
|                              | Stable            | 0.19     | 0.06      | 3.09      | 0.00    |

### 2.3 Ordinal models

## 2.3.1 Question 2: ordinal - In the womb

| fct                     | term                               | estimate | std.error | statistic | coef.type   |
|-------------------------|------------------------------------|----------|-----------|-----------|-------------|
| age                     | 41-60                              | 0.36     | 0.03      | 14.06     | coefficient |
|                         | <= 40                              | 0.41     | 0.03      | 11.92     | coefficient |
|                         | Not important Moderately important | -2.82    | 0.03      | -91.71    | scale       |
|                         | Moderately important Important     | -1.44    | 0.02      | -71.71    | scale       |
|                         | Important Very important           | 0.01     | 0.02      | 0.53      | scale       |
| education               | Lower                              | -0.47    | 0.02      | -19.05    | coefficient |
|                         | Not important Moderately important | -3.18    | 0.03      | -105.36   | scale       |
|                         | Moderately important Important     | -1.80    | 0.02      | -95.89    | scale       |
|                         | Important Very important           | -0.34    | 0.01      | -23.36    | scale       |
| gender                  | Man                                | -0.45    | 0.03      | -17.48    | coefficient |
|                         | Other/Undisclosed                  | 0.04     | 0.18      | 0.22      | coefficient |
|                         | Not important Moderately important | -3.15    | 0.03      | -105.21   | scale       |
|                         | Moderately important Important     | -1.77    | 0.02      | -96.10    | scale       |
|                         | Important Very important           | -0.32    | 0.01      | -22.24    | scale       |
| healthcare_experience   | Yes                                | 0.53     | 0.02      | 21.60     | coefficient |
|                         | Not important Moderately important | -2.83    | 0.03      | -95.61    | scale       |
|                         | Moderately important Important     | -1.45    | 0.02      | -79.22    | scale       |
|                         | Important Very important           | 0.01     | 0.02      | 0.66      | scale       |
| cognitive_health        | Below average                      | -0.39    | 0.05      | -8.04     | coefficient |
|                         | Not important Moderately important | -3.03    | 0.03      | -105.28   | scale       |
|                         | Moderately important Important     | -1.66    | 0.02      | -99.23    | scale       |
|                         | Important Very important           | -0.22    | 0.01      | -17.21    | scale       |
| mental_health           | Below average                      | -0.01    | 0.03      | -0.22     | coefficient |
|                         | Not important Moderately important | -3.01    | 0.03      | -103.92   | scale       |
|                         | Moderately important Important     | -1.64    | 0.02      | -96.26    | scale       |
|                         | Important Very important           | -0.19    | 0.01      | -14.94    | scale       |
| illness_experience      | Yes                                | 0.02     | 0.02      | 0.86      | coefficient |
|                         | Not important Moderately important | -3.00    | 0.03      | -99.59    | scale       |
|                         | Moderately important Important     | -1.63    | 0.02      | -86.01    | scale       |
|                         | Important Very important           | -0.18    | 0.02      | -11.95    | scale       |
| brain_disease_caregiver | Yes                                | 0.17     | 0.02      | 7.15      | coefficient |
|                         | Not important Moderately important | -2.93    | 0.03      | -96.53    | scale       |
|                         | Moderately important Important     | -1.56    | 0.02      | -80.16    | scale       |
|                         | Important Very important           | -0.11    | 0.02      | -7.05     | scale       |
|                         | Yes                                | 0.02     | 0.02      | 0.83      | coefficient |
|                         | Not important Moderately important | -3.00    | 0.03      | -98.90    | scale       |

*(continued)*

| fct                          | term                               | estimate | std.error | statistic | coef.type   |
|------------------------------|------------------------------------|----------|-----------|-----------|-------------|
| brain_research_participation | Moderately important Important     | -1.63    | 0.02      | -84.53    | scale       |
|                              | Important Very important           | -0.18    | 0.02      | -11.65    | scale       |
|                              | Stable                             | 0.04     | 0.02      | 1.75      | coefficient |
| relationship                 | Not important Moderately important | -2.98    | 0.03      | -95.12    | scale       |
|                              | Moderately important Important     | -1.61    | 0.02      | -77.15    | scale       |
|                              | Important Very important           | -0.17    | 0.02      | -9.51     | scale       |

For peer review only

## 2.3.2 Question 2: ordinal - Childhood

| fct                     | term                               | estimate | std.error | statistic | coef.type   |
|-------------------------|------------------------------------|----------|-----------|-----------|-------------|
| age                     | 41-60                              | 0.42     | 0.03      | 14.35     | coefficient |
|                         | <= 40                              | 0.75     | 0.04      | 17.90     | coefficient |
|                         | Not important Moderately important | -4.83    | 0.08      | -62.21    | scale       |
|                         | Moderately important Important     | -2.68    | 0.03      | -89.23    | scale       |
|                         | Important Very important           | -0.67    | 0.02      | -35.65    | scale       |
| education               | Lower                              | -0.40    | 0.03      | -14.12    | coefficient |
|                         | Not important Moderately important | -5.21    | 0.08      | -67.28    | scale       |
|                         | Moderately important Important     | -3.07    | 0.03      | -104.07   | scale       |
|                         | Important Very important           | -1.06    | 0.02      | -63.85    | scale       |
| gender                  | Man                                | -0.30    | 0.03      | -10.27    | coefficient |
|                         | Other/Undisclosed                  | 0.26     | 0.22      | 1.18      | coefficient |
|                         | Not important Moderately important | -5.16    | 0.08      | -66.77    | scale       |
|                         | Moderately important Important     | -3.02    | 0.03      | -103.70   | scale       |
|                         | Important Very important           | -1.02    | 0.02      | -62.99    | scale       |
| healthcare_experience   | Yes                                | 0.40     | 0.03      | 14.30     | coefficient |
|                         | Not important Moderately important | -4.93    | 0.08      | -63.89    | scale       |
|                         | Moderately important Important     | -2.79    | 0.03      | -96.22    | scale       |
|                         | Important Very important           | -0.78    | 0.02      | -47.14    | scale       |
| cognitive_health        | Below average                      | -0.34    | 0.05      | -6.48     | coefficient |
|                         | Not important Moderately important | -5.09    | 0.08      | -66.32    | scale       |
|                         | Moderately important Important     | -2.95    | 0.03      | -106.19   | scale       |
|                         | Important Very important           | -0.95    | 0.01      | -68.57    | scale       |
| mental_health           | Below average                      | 0.13     | 0.04      | 3.18      | coefficient |
|                         | Not important Moderately important | -5.05    | 0.08      | -65.76    | scale       |
|                         | Moderately important Important     | -2.91    | 0.03      | -104.24   | scale       |
|                         | Important Very important           | -0.91    | 0.01      | -63.83    | scale       |
| illness_experience      | Yes                                | 0.01     | 0.03      | 0.38      | coefficient |
|                         | Not important Moderately important | -5.07    | 0.08      | -65.39    | scale       |
|                         | Moderately important Important     | -2.92    | 0.03      | -98.86    | scale       |
|                         | Important Very important           | -0.93    | 0.02      | -53.62    | scale       |
| brain_disease_caregiver | Yes                                | -0.02    | 0.03      | -0.88     | coefficient |
|                         | Not important Moderately important | -5.08    | 0.08      | -65.38    | scale       |
|                         | Moderately important Important     | -2.94    | 0.03      | -97.21    | scale       |
|                         | Important Very important           | -0.94    | 0.02      | -51.38    | scale       |
|                         | Yes                                | -0.08    | 0.03      | -2.96     | coefficient |
|                         | Not important Moderately important | -5.11    | 0.08      | -65.76    | scale       |



*(continued)*

| fct                          | term                               | estimate | std.error | statistic | coef.type   |
|------------------------------|------------------------------------|----------|-----------|-----------|-------------|
| brain_research_participation | Moderately important Important     | -2.96    | 0.03      | -98.75    | scale       |
|                              | Important Very important           | -0.96    | 0.02      | -53.99    | scale       |
| relationship                 | Stable                             | -0.05    | 0.03      | -2.04     | coefficient |
|                              | Not important Moderately important | -5.10    | 0.08      | -65.22    | scale       |
|                              | Moderately important Important     | -2.96    | 0.03      | -94.07    | scale       |
|                              | Important Very important           | -0.96    | 0.02      | -47.50    | scale       |

For peer review only

## 2.3.3 Question 2: ordinal - Adolescence

| fct                     | term                               | estimate | std.error | statistic | coef.type   |
|-------------------------|------------------------------------|----------|-----------|-----------|-------------|
| age                     | 41-60                              | 0.38     | 0.03      | 13.32     | coefficient |
|                         | <= 40                              | 0.66     | 0.04      | 16.26     | coefficient |
|                         | Not important Moderately important | -5.56    | 0.11      | -50.61    | scale       |
|                         | Moderately important Important     | -3.12    | 0.04      | -88.13    | scale       |
|                         | Important Very important           | -0.62    | 0.02      | -33.11    | scale       |
| education               | Lower                              | -0.23    | 0.03      | -8.34     | coefficient |
|                         | Not important Moderately important | -5.86    | 0.11      | -53.44    | scale       |
|                         | Moderately important Important     | -3.42    | 0.03      | -98.66    | scale       |
|                         | Important Very important           | -0.93    | 0.02      | -57.62    | scale       |
| gender                  | Man                                | -0.34    | 0.03      | -12.01    | coefficient |
|                         | Other/Undisclosed                  | 0.31     | 0.22      | 1.43      | coefficient |
|                         | Not important Moderately important | -5.89    | 0.11      | -53.71    | scale       |
|                         | Moderately important Important     | -3.45    | 0.03      | -99.56    | scale       |
|                         | Important Very important           | -0.95    | 0.02      | -59.87    | scale       |
| healthcare_experience   | Yes                                | 0.35     | 0.03      | 12.77     | coefficient |
|                         | Not important Moderately important | -5.66    | 0.11      | -51.65    | scale       |
|                         | Moderately important Important     | -3.22    | 0.03      | -93.38    | scale       |
|                         | Important Very important           | -0.72    | 0.02      | -44.12    | scale       |
| cognitive_health        | Below average                      | -0.27    | 0.05      | -4.99     | coefficient |
|                         | Not important Moderately important | -5.80    | 0.11      | -53.05    | scale       |
|                         | Moderately important Important     | -3.36    | 0.03      | -100.36   | scale       |
|                         | Important Very important           | -0.87    | 0.01      | -63.84    | scale       |
| mental_health           | Below average                      | 0.12     | 0.04      | 3.07      | coefficient |
|                         | Not important Moderately important | -5.77    | 0.11      | -52.75    | scale       |
|                         | Moderately important Important     | -3.33    | 0.03      | -99.00    | scale       |
|                         | Important Very important           | -0.84    | 0.01      | -59.49    | scale       |
| illness_experience      | Yes                                | 0.04     | 0.03      | 1.55      | coefficient |
|                         | Not important Moderately important | -5.77    | 0.11      | -52.56    | scale       |
|                         | Moderately important Important     | -3.33    | 0.03      | -95.27    | scale       |
|                         | Important Very important           | -0.84    | 0.02      | -49.34    | scale       |
| brain_disease_caregiver | Yes                                | 0.02     | 0.03      | 0.64      | coefficient |
|                         | Not important Moderately important | -5.78    | 0.11      | -52.55    | scale       |
|                         | Moderately important Important     | -3.34    | 0.04      | -94.16    | scale       |
|                         | Important Very important           | -0.85    | 0.02      | -47.15    | scale       |
|                         | Yes                                | 0.01     | 0.03      | 0.30      | coefficient |
|                         | Not important Moderately important | -5.78    | 0.11      | -52.62    | scale       |

(continued)

| fct                          | term                               | estimate | std.error | statistic | coef.type   |
|------------------------------|------------------------------------|----------|-----------|-----------|-------------|
| brain_research_participation | Moderately important Important     | -3.34    | 0.04      | -94.96    | scale       |
|                              | Important Very important           | -0.85    | 0.02      | -48.79    | scale       |
| relationship                 | Stable                             | -0.10    | 0.03      | -3.76     | coefficient |
|                              | Not important Moderately important | -5.84    | 0.11      | -52.95    | scale       |
|                              | Moderately important Important     | -3.40    | 0.04      | -92.85    | scale       |
|                              | Important Very important           | -0.91    | 0.02      | -45.45    | scale       |

For peer review only

## 2.3.4 Question 2: ordinal - Young adulthood

| fct                     | term                               | estimate | std.error | statistic | coef.type   |
|-------------------------|------------------------------------|----------|-----------|-----------|-------------|
| age                     | 41-60                              | 0.24     | 0.03      | 8.95      | coefficient |
|                         | <= 40                              | 0.26     | 0.04      | 7.35      | coefficient |
|                         | Not important Moderately important | -6.22    | 0.14      | -42.98    | scale       |
|                         | Moderately important Important     | -2.91    | 0.03      | -92.86    | scale       |
|                         | Important Very important           | -0.25    | 0.02      | -14.00    | scale       |
| education               | Lower                              | -0.05    | 0.03      | -2.10     | coefficient |
|                         | Not important Moderately important | -6.36    | 0.14      | -43.98    | scale       |
|                         | Moderately important Important     | -3.05    | 0.03      | -101.48   | scale       |
|                         | Important Very important           | -0.40    | 0.01      | -26.85    | scale       |
| gender                  | Man                                | -0.41    | 0.03      | -15.28    | coefficient |
|                         | Other/Undisclosed                  | -0.11    | 0.18      | -0.59     | coefficient |
|                         | Not important Moderately important | -6.48    | 0.14      | -44.75    | scale       |
|                         | Moderately important Important     | -3.17    | 0.03      | -104.40   | scale       |
|                         | Important Very important           | -0.50    | 0.01      | -33.93    | scale       |
| healthcare_experience   | Yes                                | 0.32     | 0.03      | 12.52     | coefficient |
|                         | Not important Moderately important | -6.23    | 0.14      | -43.09    | scale       |
|                         | Moderately important Important     | -2.92    | 0.03      | -97.06    | scale       |
|                         | Important Very important           | -0.26    | 0.02      | -16.82    | scale       |
| cognitive_health        | Below average                      | -0.15    | 0.05      | -3.02     | coefficient |
|                         | Not important Moderately important | -6.36    | 0.14      | -43.98    | scale       |
|                         | Moderately important Important     | -3.05    | 0.03      | -104.72   | scale       |
|                         | Important Very important           | -0.39    | 0.01      | -30.73    | scale       |
| mental_health           | Below average                      | -0.01    | 0.04      | -0.21     | coefficient |
|                         | Not important Moderately important | -6.35    | 0.14      | -43.91    | scale       |
|                         | Moderately important Important     | -3.04    | 0.03      | -103.73   | scale       |
|                         | Important Very important           | -0.38    | 0.01      | -28.96    | scale       |
| illness_experience      | Yes                                | 0.11     | 0.02      | 4.58      | coefficient |
|                         | Not important Moderately important | -6.30    | 0.14      | -43.53    | scale       |
|                         | Moderately important Important     | -2.99    | 0.03      | -98.31    | scale       |
|                         | Important Very important           | -0.34    | 0.02      | -21.24    | scale       |
| brain_disease_caregiver | Yes                                | 0.18     | 0.02      | 7.39      | coefficient |
|                         | Not important Moderately important | -6.27    | 0.14      | -43.26    | scale       |
|                         | Moderately important Important     | -2.96    | 0.03      | -96.03    | scale       |
|                         | Important Very important           | -0.30    | 0.02      | -17.92    | scale       |
|                         | Yes                                | 0.08     | 0.02      | 3.25      | coefficient |
|                         | Not important Moderately important | -6.31    | 0.14      | -43.58    | scale       |

*(continued)*

| fct                          | term                               | estimate | std.error | statistic | coef.type   |
|------------------------------|------------------------------------|----------|-----------|-----------|-------------|
| brain_research_participation | Moderately important Important     | -3.00    | 0.03      | -97.93    | scale       |
|                              | Important Very important           | -0.35    | 0.02      | -21.42    | scale       |
| relationship                 | Stable                             | -0.03    | 0.02      | -1.05     | coefficient |
|                              | Not important Moderately important | -6.33    | 0.14      | -44.12    | scale       |
|                              | Moderately important Important     | -3.05    | 0.03      | -95.27    | scale       |
|                              | Important Very important           | -0.39    | 0.02      | -21.42    | scale       |

For peer review only

## 2.3.5 Question 2: ordinal - Middle age

| fct                     | term                               | estimate | std.error | statistic | coef.type   |
|-------------------------|------------------------------------|----------|-----------|-----------|-------------|
| age                     | 41-60                              | 0.35     | 0.03      | 12.69     | coefficient |
|                         | <= 40                              | -0.01    | 0.04      | -0.32     | coefficient |
|                         | Not important Moderately important | -6.23    | 0.14      | -43.01    | scale       |
|                         | Moderately important Important     | -3.02    | 0.03      | -92.29    | scale       |
|                         | Important Very important           | -0.46    | 0.02      | -25.37    | scale       |
| education               | Lower                              | -0.04    | 0.03      | -1.47     | coefficient |
|                         | Not important Moderately important | -6.35    | 0.14      | -44.05    | scale       |
|                         | Moderately important Important     | -3.15    | 0.03      | -100.25   | scale       |
|                         | Important Very important           | -0.60    | 0.02      | -39.50    | scale       |
| gender                  | Man                                | -0.54    | 0.03      | -19.76    | coefficient |
|                         | Other/Undisclosed                  | -0.45    | 0.18      | -2.45     | coefficient |
|                         | Not important Moderately important | -6.50    | 0.14      | -45.45    | scale       |
|                         | Moderately important Important     | -3.32    | 0.03      | -104.16   | scale       |
|                         | Important Very important           | -0.75    | 0.02      | -49.01    | scale       |
| healthcare_experience   | Yes                                | 0.23     | 0.03      | 8.82      | coefficient |
|                         | Not important Moderately important | -6.26    | 0.14      | -43.29    | scale       |
|                         | Moderately important Important     | -3.05    | 0.03      | -96.76    | scale       |
|                         | Important Very important           | -0.50    | 0.02      | -31.56    | scale       |
| cognitive_health        | Below average                      | -0.15    | 0.05      | -2.97     | coefficient |
|                         | Not important Moderately important | -6.36    | 0.14      | -43.99    | scale       |
|                         | Moderately important Important     | -3.15    | 0.03      | -103.43   | scale       |
|                         | Important Very important           | -0.60    | 0.01      | -45.89    | scale       |
| mental_health           | Below average                      | -0.06    | 0.04      | -1.57     | coefficient |
|                         | Not important Moderately important | -6.34    | 0.14      | -44.15    | scale       |
|                         | Moderately important Important     | -3.14    | 0.03      | -102.64   | scale       |
|                         | Important Very important           | -0.59    | 0.01      | -44.03    | scale       |
| illness_experience      | Yes                                | 0.06     | 0.03      | 2.42      | coefficient |
|                         | Not important Moderately important | -6.32    | 0.14      | -43.79    | scale       |
|                         | Moderately important Important     | -3.11    | 0.03      | -97.73    | scale       |
|                         | Important Very important           | -0.56    | 0.02      | -34.71    | scale       |
| brain_disease_caregiver | Yes                                | 0.32     | 0.03      | 12.90     | coefficient |
|                         | Not important Moderately important | -6.21    | 0.14      | -42.99    | scale       |
|                         | Moderately important Important     | -3.00    | 0.03      | -93.80    | scale       |
|                         | Important Very important           | -0.44    | 0.02      | -26.08    | scale       |
|                         | Yes                                | 0.11     | 0.03      | 4.50      | coefficient |
|                         | Not important Moderately important | -6.30    | 0.14      | -43.49    | scale       |

*(continued)*

| fct                          | term                               | estimate | std.error | statistic | coef.type   |
|------------------------------|------------------------------------|----------|-----------|-----------|-------------|
| brain_research_participation | Moderately important Important     | -3.09    | 0.03      | -96.61    | scale       |
|                              | Important Very important           | -0.54    | 0.02      | -32.58    | scale       |
| relationship                 | Stable                             | 0.06     | 0.03      | 2.28      | coefficient |
|                              | Not important Moderately important | -6.32    | 0.15      | -43.43    | scale       |
|                              | Moderately important Important     | -3.10    | 0.03      | -93.44    | scale       |
|                              | Important Very important           | -0.56    | 0.02      | -29.55    | scale       |

For peer review only

## 2.3.6 Question 2: ordinal - Old age

| fct                     | term                               | estimate | std.error | statistic | coef.type   |
|-------------------------|------------------------------------|----------|-----------|-----------|-------------|
| age                     | 41-60                              | 0.02     | 0.03      | 0.73      | coefficient |
|                         | <= 40                              | -0.30    | 0.04      | -7.86     | coefficient |
|                         | Not important Moderately important | -5.63    | 0.10      | -56.36    | scale       |
|                         | Moderately important Important     | -3.21    | 0.03      | -94.19    | scale       |
|                         | Important Very important           | -1.02    | 0.02      | -51.00    | scale       |
| education               | Lower                              | -0.14    | 0.03      | -4.92     | coefficient |
|                         | Not important Moderately important | -5.63    | 0.10      | -56.74    | scale       |
|                         | Moderately important Important     | -3.21    | 0.03      | -100.08   | scale       |
|                         | Important Very important           | -1.03    | 0.02      | -62.27    | scale       |
| gender                  | Man                                | -0.41    | 0.03      | -14.21    | coefficient |
|                         | Other/Undisclosed                  | -0.50    | 0.19      | -2.67     | coefficient |
|                         | Not important Moderately important | -5.72    | 0.10      | -57.62    | scale       |
|                         | Moderately important Important     | -3.30    | 0.03      | -102.30   | scale       |
|                         | Important Very important           | -1.11    | 0.02      | -67.19    | scale       |
| healthcare_experience   | Yes                                | 0.13     | 0.03      | 4.73      | coefficient |
|                         | Not important Moderately important | -5.53    | 0.10      | -55.76    | scale       |
|                         | Moderately important Important     | -3.11    | 0.03      | -96.61    | scale       |
|                         | Important Very important           | -0.93    | 0.02      | -54.50    | scale       |
| cognitive_health        | Below average                      | -0.15    | 0.06      | -2.77     | coefficient |
|                         | Not important Moderately important | -5.59    | 0.10      | -56.60    | scale       |
|                         | Moderately important Important     | -3.17    | 0.03      | -103.01   | scale       |
|                         | Important Very important           | -0.99    | 0.01      | -70.78    | scale       |
| mental_health           | Below average                      | -0.11    | 0.04      | -2.83     | coefficient |
|                         | Not important Moderately important | -5.60    | 0.10      | -56.61    | scale       |
|                         | Moderately important Important     | -3.18    | 0.03      | -102.29   | scale       |
|                         | Important Very important           | -1.00    | 0.01      | -68.38    | scale       |
| illness_experience      | Yes                                | 0.04     | 0.03      | 1.47      | coefficient |
|                         | Not important Moderately important | -5.57    | 0.10      | -56.04    | scale       |
|                         | Moderately important Important     | -3.15    | 0.03      | -96.92    | scale       |
|                         | Important Very important           | -0.97    | 0.02      | -55.33    | scale       |
| brain_disease_caregiver | Yes                                | 0.26     | 0.03      | 9.43      | coefficient |
|                         | Not important Moderately important | -5.47    | 0.10      | -55.05    | scale       |
|                         | Moderately important Important     | -3.05    | 0.03      | -93.46    | scale       |
|                         | Important Very important           | -0.87    | 0.02      | -48.00    | scale       |
|                         | Yes                                | 0.19     | 0.03      | 6.92      | coefficient |
|                         | Not important Moderately important | -5.50    | 0.10      | -55.42    | scale       |



*(continued)*

| fct                          | term                               | estimate | std.error | statistic | coef.type   |
|------------------------------|------------------------------------|----------|-----------|-----------|-------------|
| brain_research_participation | Moderately important Important     | -3.08    | 0.03      | -94.99    | scale       |
|                              | Important Very important           | -0.90    | 0.02      | -51.13    | scale       |
|                              | Stable                             | 0.08     | 0.03      | 2.82      | coefficient |
| relationship                 | Not important Moderately important | -5.54    | 0.10      | -55.50    | scale       |
|                              | Moderately important Important     | -3.12    | 0.03      | -91.85    | scale       |
|                              | Important Very important           | -0.94    | 0.02      | -46.55    | scale       |

## 2.4 Comparison binary and continuous model results

### 2.4.1 Question 2: bin\_vs\_cont - In the womb

| fct                          | Binary |          |           |           |         | Continuous |      |           |           |         |
|------------------------------|--------|----------|-----------|-----------|---------|------------|------|-----------|-----------|---------|
|                              | term   | log_odds | std.error | statistic | p.value | term       | beta | std.error | statistic | p.value |
| brain_research_participation | Yes    | -0.03    | 0.03      | -1.05     | 0.29    | Yes        | 0    | 0.01      | 0.42      | 0.67    |

### 2.4.2 Question 2: bin\_vs\_cont - Childhood

| fct                     | Binary            |          |           |           |         | Continuous        |      |           |           |         |
|-------------------------|-------------------|----------|-----------|-----------|---------|-------------------|------|-----------|-----------|---------|
|                         | term              | log_odds | std.error | statistic | p.value | term              | beta | std.error | statistic | p.value |
| gender                  | Other/Undisclosed | -0.12    | 0.42      | -0.28     | 0.78    | Other/Undisclosed | 0.04 | 0.05      | 0.80      | 0.42    |
| mental_health           | Below average     | -0.04    | 0.08      | -0.46     | 0.65    | Below average     | 0.02 | 0.01      | 2.17      | 0.03    |
| brain_disease_caregiver | Yes               | 0.02     | 0.06      | 0.29      | 0.77    | Yes               | 0.00 | 0.01      | -0.41     | 0.68    |

### 2.4.3 Question 2: bin\_vs\_cont - Adolescence

| fct                          | Binary            |          |           |           |         | Continuous        |      |           |           |         |
|------------------------------|-------------------|----------|-----------|-----------|---------|-------------------|------|-----------|-----------|---------|
|                              | term              | log_odds | std.error | statistic | p.value | term              | beta | std.error | statistic | p.value |
| gender                       | Other/Undisclosed | -0.29    | 0.46      | -0.64     | 0.52    | Other/Undisclosed | 0.05 | 0.05      | 0.94      | 0.35    |
| mental_health                | Below average     | -0.11    | 0.09      | -1.16     | 0.25    | Below average     | 0.02 | 0.01      | 2.32      | 0.02    |
| illness_experience           | Yes               | -0.01    | 0.07      | -0.12     | 0.91    | Yes               | 0.01 | 0.01      | 1.19      | 0.24    |
| brain_disease_caregiver      | Yes               | 0.00     | 0.07      | -0.02     | 0.98    | Yes               | 0.00 | 0.01      | 0.66      | 0.51    |
| brain_research_participation | Yes               | -0.05    | 0.07      | -0.68     | 0.50    | Yes               | 0.00 | 0.01      | 0.09      | 0.93    |

### 2.4.4 Question 2: bin\_vs\_cont - Young adulthood

| fct                          | Binary |          |           |           |         | Continuous |       |           |           |         |
|------------------------------|--------|----------|-----------|-----------|---------|------------|-------|-----------|-----------|---------|
|                              | term   | log_odds | std.error | statistic | p.value | term       | beta  | std.error | statistic | p.value |
| education                    | Lower  | 0.05     | 0.06      | 0.86      | 0.39    | Lower      | -0.01 | 0.01      | -1.85     | 0.06    |
| brain_research_participation | Yes    | -0.04    | 0.06      | -0.77     | 0.44    | Yes        | 0.02  | 0.01      | 2.78      | 0.01    |
| relationship                 | Stable | 0.07     | 0.06      | 1.19      | 0.23    | Stable     | 0.00  | 0.01      | -0.67     | 0.51    |

1  
2  
3  
4  
5  
6  
7  
8  
9  
10  
11  
12  
13  
14  
15  
16  
17  
18  
19  
20  
21  
22  
23  
24  
25  
26  
27  
28  
29  
30  
31  
32  
33  
34  
35  
36  
37  
38  
39  
40  
41  
42  
43  
44  
45  
46  
47  
48  
49  
50  
51  
52  
53  
54  
55  
56  
57  
58  
59  
60

**3 Question 3**

**3.1 Binary models**

For peer review only

## 3.1.1 Question 3: binary - Alzheimer's

| fct                          | term              | estimate | std.error | statistic | p.value |
|------------------------------|-------------------|----------|-----------|-----------|---------|
|                              | (Intercept)       | 4.97     | 0.11      | 46.45     | 0.00    |
| age                          | 41-60             | 0.08     | 0.16      | 0.47      | 0.64    |
|                              | <= 40             | -1.06    | 0.15      | -6.97     | 0.00    |
| education                    | (Intercept)       | 5.02     | 0.09      | 55.72     | 0.00    |
|                              | Lower             | -0.74    | 0.13      | -5.72     | 0.00    |
| gender                       | (Intercept)       | 5.07     | 0.09      | 55.85     | 0.00    |
|                              | Man               | -0.91    | 0.13      | -7.05     | 0.00    |
|                              | Other/Undisclosed | 12.49    | 352.44    | 0.04      | 0.97    |
| healthcare_experience        | (Intercept)       | 4.47     | 0.07      | 61.46     | 0.00    |
|                              | Yes               | 0.86     | 0.16      | 5.45      | 0.00    |
| cognitive_health             | (Intercept)       | 4.75     | 0.07      | 70.47     | 0.00    |
|                              | Below average     | -0.35    | 0.23      | -1.48     | 0.14    |
| mental_health                | (Intercept)       | 4.80     | 0.07      | 66.87     | 0.00    |
|                              | Below average     | -0.44    | 0.16      | -2.69     | 0.01    |
| illness_experience           | (Intercept)       | 4.89     | 0.09      | 53.86     | 0.00    |
|                              | Yes               | -0.38    | 0.13      | -2.91     | 0.00    |
| brain_disease_caregiver      | (Intercept)       | 4.41     | 0.08      | 58.21     | 0.00    |
|                              | Yes               | 0.85     | 0.14      | 5.86      | 0.00    |
| brain_research_participation | (Intercept)       | 4.46     | 0.08      | 59.30     | 0.00    |
|                              | Yes               | 0.78     | 0.15      | 5.29      | 0.00    |
| relationship                 | (Intercept)       | 4.42     | 0.08      | 52.85     | 0.00    |
|                              | Stable            | 0.65     | 0.13      | 4.90      | 0.00    |

## 3.1.2 Question 3: binary - Schizophrenia

| fct                          | term              | estimate | std.error | statistic | p.value |
|------------------------------|-------------------|----------|-----------|-----------|---------|
|                              | (Intercept)       | 2.98     | 0.04      | 72.17     | 0.00    |
| age                          | 41-60             | 0.38     | 0.07      | 5.62      | 0.00    |
|                              | <= 40             | 0.29     | 0.09      | 3.28      | 0.00    |
| education                    | (Intercept)       | 3.33     | 0.04      | 83.62     | 0.00    |
|                              | Lower             | -0.48    | 0.06      | -7.79     | 0.00    |
| gender                       | (Intercept)       | 3.30     | 0.04      | 85.53     | 0.00    |
|                              | Man               | -0.45    | 0.06      | -7.11     | 0.00    |
|                              | Other/Undisclosed | -0.31    | 0.42      | -0.73     | 0.47    |
| healthcare_experience        | (Intercept)       | 3.01     | 0.04      | 82.83     | 0.00    |
|                              | Yes               | 0.42     | 0.07      | 6.33      | 0.00    |
| cognitive_health             | (Intercept)       | 3.21     | 0.03      | 99.65     | 0.00    |
|                              | Below average     | -0.74    | 0.10      | -7.54     | 0.00    |
| mental_health                | (Intercept)       | 3.15     | 0.03      | 96.65     | 0.00    |
|                              | Below average     | 0.00     | 0.09      | 0.03      | 0.97    |
| illness_experience           | (Intercept)       | 3.22     | 0.04      | 79.23     | 0.00    |
|                              | Yes               | -0.17    | 0.06      | -2.74     | 0.01    |
| brain_disease_caregiver      | (Intercept)       | 3.06     | 0.04      | 76.83     | 0.00    |
|                              | Yes               | 0.22     | 0.06      | 3.58      | 0.00    |
| brain_research_participation | (Intercept)       | 3.02     | 0.04      | 79.51     | 0.00    |
|                              | Yes               | 0.33     | 0.06      | 5.23      | 0.00    |
| relationship                 | (Intercept)       | 3.18     | 0.05      | 68.62     | 0.00    |
|                              | Stable            | -0.04    | 0.06      | -0.69     | 0.49    |

## 3.1.3 Question 3: binary - Depression

| fct                          | term              | estimate | std.error | statistic | p.value |
|------------------------------|-------------------|----------|-----------|-----------|---------|
|                              | (Intercept)       | 2.79     | 0.04      | 73.54     | 0.00    |
| age                          | 41-60             | 0.42     | 0.06      | 6.55      | 0.00    |
|                              | <= 40             | 0.26     | 0.08      | 3.15      | 0.00    |
| education                    | (Intercept)       | 3.08     | 0.04      | 86.76     | 0.00    |
|                              | Lower             | -0.33    | 0.06      | -5.67     | 0.00    |
| gender                       | (Intercept)       | 3.08     | 0.03      | 88.33     | 0.00    |
|                              | Man               | -0.36    | 0.06      | -6.21     | 0.00    |
|                              | Other/Undisclosed | 0.10     | 0.46      | 0.23      | 0.82    |
| healthcare_experience        | (Intercept)       | 2.85     | 0.03      | 84.24     | 0.00    |
|                              | Yes               | 0.32     | 0.06      | 5.38      | 0.00    |
| cognitive_health             | (Intercept)       | 2.99     | 0.03      | 102.71    | 0.00    |
|                              | Below average     | -0.31    | 0.10      | -2.94     | 0.00    |
| mental_health                | (Intercept)       | 2.93     | 0.03      | 99.39     | 0.00    |
|                              | Below average     | 0.34     | 0.09      | 3.63      | 0.00    |
| illness_experience           | (Intercept)       | 2.97     | 0.04      | 81.99     | 0.00    |
|                              | Yes               | 0.00     | 0.06      | -0.02     | 0.99    |
| brain_disease_caregiver      | (Intercept)       | 2.87     | 0.04      | 78.49     | 0.00    |
|                              | Yes               | 0.23     | 0.06      | 4.04      | 0.00    |
| brain_research_participation | (Intercept)       | 2.84     | 0.04      | 81.08     | 0.00    |
|                              | Yes               | 0.32     | 0.06      | 5.49      | 0.00    |
| relationship                 | (Intercept)       | 2.98     | 0.04      | 70.44     | 0.00    |
|                              | Stable            | -0.02    | 0.06      | -0.30     | 0.76    |

## 3.1.4 Question 3: binary - Bipolar

| fct                          | term              | estimate | std.error | statistic | p.value |
|------------------------------|-------------------|----------|-----------|-----------|---------|
|                              | (Intercept)       | 2.08     | 0.03      | 73.75     | 0.00    |
| age                          | 41-60             | 0.78     | 0.05      | 15.01     | 0.00    |
|                              | <= 40             | 0.64     | 0.07      | 9.40      | 0.00    |
| education                    | (Intercept)       | 2.76     | 0.03      | 89.77     | 0.00    |
|                              | Lower             | -0.86    | 0.04      | -19.41    | 0.00    |
| gender                       | (Intercept)       | 2.68     | 0.03      | 91.92     | 0.00    |
|                              | Man               | -0.75    | 0.04      | -16.70    | 0.00    |
|                              | Other/Undisclosed | 0.01     | 0.37      | 0.03      | 0.98    |
| healthcare_experience        | (Intercept)       | 2.19     | 0.03      | 85.72     | 0.00    |
|                              | Yes               | 0.70     | 0.05      | 13.78     | 0.00    |
| cognitive_health             | (Intercept)       | 2.45     | 0.02      | 106.57    | 0.00    |
|                              | Below average     | -0.49    | 0.08      | -6.29     | 0.00    |
| mental_health                | (Intercept)       | 2.39     | 0.02      | 102.47    | 0.00    |
|                              | Below average     | 0.25     | 0.07      | 3.60      | 0.00    |
| illness_experience           | (Intercept)       | 2.42     | 0.03      | 84.89     | 0.00    |
|                              | Yes               | -0.01    | 0.04      | -0.29     | 0.77    |
| brain_disease_caregiver      | (Intercept)       | 2.25     | 0.03      | 80.16     | 0.00    |
|                              | Yes               | 0.41     | 0.05      | 8.97      | 0.00    |
| brain_research_participation | (Intercept)       | 2.26     | 0.03      | 82.64     | 0.00    |
|                              | Yes               | 0.41     | 0.05      | 8.96      | 0.00    |
| relationship                 | (Intercept)       | 2.52     | 0.03      | 72.89     | 0.00    |
|                              | Stable            | -0.18    | 0.04      | -3.92     | 0.00    |

## 3.1.5 Question 3: binary - Anxiety

| fct                          | term              | estimate | std.error | statistic | p.value |
|------------------------------|-------------------|----------|-----------|-----------|---------|
|                              | (Intercept)       | 2.09     | 0.03      | 73.83     | 0.00    |
| age                          | 41-60             | 0.43     | 0.05      | 9.24      | 0.00    |
|                              | <= 40             | 0.37     | 0.06      | 5.91      | 0.00    |
| education                    | (Intercept)       | 2.39     | 0.03      | 91.09     | 0.00    |
|                              | Lower             | -0.29    | 0.04      | -6.68     | 0.00    |
| gender                       | (Intercept)       | 2.36     | 0.03      | 92.74     | 0.00    |
|                              | Man               | -0.23    | 0.04      | -5.17     | 0.00    |
|                              | Other/Undisclosed | 0.63     | 0.42      | 1.51      | 0.13    |
| healthcare_experience        | (Intercept)       | 2.22     | 0.03      | 85.81     | 0.00    |
|                              | Yes               | 0.22     | 0.04      | 5.02      | 0.00    |
| cognitive_health             | (Intercept)       | 2.31     | 0.02      | 106.50    | 0.00    |
|                              | Below average     | -0.19    | 0.08      | -2.35     | 0.02    |
| mental_health                | (Intercept)       | 2.25     | 0.02      | 102.17    | 0.00    |
|                              | Below average     | 0.41     | 0.07      | 5.85      | 0.00    |
| illness_experience           | (Intercept)       | 2.27     | 0.03      | 84.71     | 0.00    |
|                              | Yes               | 0.07     | 0.04      | 1.63      | 0.10    |
| brain_disease_caregiver      | (Intercept)       | 2.21     | 0.03      | 80.03     | 0.00    |
|                              | Yes               | 0.19     | 0.04      | 4.55      | 0.00    |
| brain_research_participation | (Intercept)       | 2.18     | 0.03      | 82.34     | 0.00    |
|                              | Yes               | 0.28     | 0.04      | 6.49      | 0.00    |
| relationship                 | (Intercept)       | 2.30     | 0.03      | 72.91     | 0.00    |
|                              | Stable            | 0.00     | 0.04      | 0.00      | 1.00    |

## 3.1.6 Question 3: binary - Addiction

| fct                          | term              | estimate | std.error | statistic | p.value |
|------------------------------|-------------------|----------|-----------|-----------|---------|
|                              | (Intercept)       | 1.86     | 0.03      | 71.70     | 0.00    |
| age                          | 41-60             | 0.31     | 0.04      | 7.54      | 0.00    |
|                              | <= 40             | 0.41     | 0.06      | 7.06      | 0.00    |
| education                    | (Intercept)       | 2.20     | 0.02      | 90.62     | 0.00    |
|                              | Lower             | -0.47    | 0.04      | -12.10    | 0.00    |
| gender                       | (Intercept)       | 2.20     | 0.02      | 92.28     | 0.00    |
|                              | Man               | -0.51    | 0.04      | -12.94    | 0.00    |
|                              | Other/Undisclosed | 0.05     | 0.30      | 0.17      | 0.86    |
| healthcare_experience        | (Intercept)       | 1.81     | 0.02      | 81.89     | 0.00    |
|                              | Yes               | 0.68     | 0.04      | 15.89     | 0.00    |
| cognitive_health             | (Intercept)       | 2.06     | 0.02      | 104.94    | 0.00    |
|                              | Below average     | -0.38    | 0.07      | -5.35     | 0.00    |
| mental_health                | (Intercept)       | 2.02     | 0.02      | 100.44    | 0.00    |
|                              | Below average     | 0.11     | 0.06      | 1.99      | 0.05    |
| illness_experience           | (Intercept)       | 2.02     | 0.02      | 83.23     | 0.00    |
|                              | Yes               | 0.03     | 0.04      | 0.76      | 0.45    |
| brain_disease_caregiver      | (Intercept)       | 1.93     | 0.02      | 77.93     | 0.00    |
|                              | Yes               | 0.23     | 0.04      | 6.04      | 0.00    |
| brain_research_participation | (Intercept)       | 1.93     | 0.02      | 80.24     | 0.00    |
|                              | Yes               | 0.26     | 0.04      | 6.82      | 0.00    |
| relationship                 | (Intercept)       | 2.11     | 0.03      | 72.19     | 0.00    |
|                              | Stable            | -0.13    | 0.04      | -3.46     | 0.00    |



## 3.1.7 Question 3: binary - Stroke

| fct                          | term              | estimate | std.error | statistic | p.value |
|------------------------------|-------------------|----------|-----------|-----------|---------|
|                              | (Intercept)       | 1.97     | 0.03      | 72.84     | 0.00    |
| age                          | 41-60             | 0.15     | 0.04      | 3.60      | 0.00    |
|                              | <= 40             | -0.27    | 0.05      | -5.49     | 0.00    |
| education                    | (Intercept)       | 2.02     | 0.02      | 89.24     | 0.00    |
|                              | Lower             | -0.14    | 0.04      | -3.60     | 0.00    |
| gender                       | (Intercept)       | 2.19     | 0.02      | 92.21     | 0.00    |
|                              | Man               | -0.64    | 0.04      | -16.91    | 0.00    |
|                              | Other/Undisclosed | -0.02    | 0.29      | -0.08     | 0.93    |
| healthcare_experience        | (Intercept)       | 1.70     | 0.02      | 79.82     | 0.00    |
|                              | Yes               | 0.89     | 0.04      | 20.45     | 0.00    |
| cognitive_health             | (Intercept)       | 1.98     | 0.02      | 104.04    | 0.00    |
|                              | Below average     | -0.20    | 0.07      | -2.69     | 0.01    |
| mental_health                | (Intercept)       | 1.98     | 0.02      | 100.01    | 0.00    |
|                              | Below average     | -0.09    | 0.05      | -1.71     | 0.09    |
| illness_experience           | (Intercept)       | 1.88     | 0.02      | 81.56     | 0.00    |
|                              | Yes               | 0.25     | 0.04      | 6.56      | 0.00    |
| brain_disease_caregiver      | (Intercept)       | 1.77     | 0.02      | 75.70     | 0.00    |
|                              | Yes               | 0.48     | 0.04      | 12.70     | 0.00    |
| brain_research_participation | (Intercept)       | 1.88     | 0.02      | 79.61     | 0.00    |
|                              | Yes               | 0.23     | 0.04      | 6.17      | 0.00    |
| relationship                 | (Intercept)       | 1.88     | 0.03      | 70.25     | 0.00    |
|                              | Stable            | 0.16     | 0.04      | 4.31      | 0.00    |

## 3.1.8 Question 3: binary - Parkinson's

| fct                          | term              | estimate | std.error | statistic | p.value |
|------------------------------|-------------------|----------|-----------|-----------|---------|
|                              | (Intercept)       | 1.82     | 0.03      | 71.15     | 0.00    |
| age                          | 41-60             | 0.12     | 0.04      | 3.13      | 0.00    |
|                              | <= 40             | -0.22    | 0.05      | -4.62     | 0.00    |
| education                    | (Intercept)       | 1.99     | 0.02      | 88.93     | 0.00    |
|                              | Lower             | -0.46    | 0.04      | -12.87    | 0.00    |
| gender                       | (Intercept)       | 1.89     | 0.02      | 89.32     | 0.00    |
|                              | Man               | -0.21    | 0.04      | -5.63     | 0.00    |
|                              | Other/Undisclosed | -0.16    | 0.25      | -0.64     | 0.52    |
| healthcare_experience        | (Intercept)       | 1.59     | 0.02      | 77.61     | 0.00    |
|                              | Yes               | 0.72     | 0.04      | 18.08     | 0.00    |
| cognitive_health             | (Intercept)       | 1.84     | 0.02      | 101.83    | 0.00    |
|                              | Below average     | -0.26    | 0.07      | -3.84     | 0.00    |
| mental_health                | (Intercept)       | 1.85     | 0.02      | 98.00     | 0.00    |
|                              | Below average     | -0.17    | 0.05      | -3.47     | 0.00    |
| illness_experience           | (Intercept)       | 1.79     | 0.02      | 80.32     | 0.00    |
|                              | Yes               | 0.08     | 0.04      | 2.33      | 0.02    |
| brain_disease_caregiver      | (Intercept)       | 1.67     | 0.02      | 73.91     | 0.00    |
|                              | Yes               | 0.37     | 0.04      | 10.34     | 0.00    |
| brain_research_participation | (Intercept)       | 1.69     | 0.02      | 76.56     | 0.00    |
|                              | Yes               | 0.35     | 0.04      | 9.55      | 0.00    |
| relationship                 | (Intercept)       | 1.73     | 0.03      | 68.21     | 0.00    |
|                              | Stable            | 0.17     | 0.03      | 4.86      | 0.00    |

## 3.1.9 Question 3: binary - Migraine

| fct                          | term              | estimate | std.error | statistic | p.value |
|------------------------------|-------------------|----------|-----------|-----------|---------|
|                              | (Intercept)       | 1.24     | 0.02      | 58.41     | 0.00    |
| age                          | 41-60             | 0.57     | 0.04      | 16.21     | 0.00    |
|                              | <= 40             | 0.78     | 0.05      | 15.24     | 0.00    |
| education                    | (Intercept)       | 1.68     | 0.02      | 83.96     | 0.00    |
|                              | Lower             | -0.38    | 0.03      | -11.48    | 0.00    |
| gender                       | (Intercept)       | 1.62     | 0.02      | 84.32     | 0.00    |
|                              | Man               | -0.25    | 0.03      | -7.46     | 0.00    |
|                              | Other/Undisclosed | 0.04     | 0.24      | 0.18      | 0.86    |
| healthcare_experience        | (Intercept)       | 1.36     | 0.02      | 71.15     | 0.00    |
|                              | Yes               | 0.56     | 0.03      | 16.24     | 0.00    |
| cognitive_health             | (Intercept)       | 1.57     | 0.02      | 95.25     | 0.00    |
|                              | Below average     | -0.28    | 0.06      | -4.46     | 0.00    |
| mental_health                | (Intercept)       | 1.55     | 0.02      | 90.96     | 0.00    |
|                              | Below average     | 0.02     | 0.05      | 0.46      | 0.65    |
| illness_experience           | (Intercept)       | 1.51     | 0.02      | 74.37     | 0.00    |
|                              | Yes               | 0.11     | 0.03      | 3.28      | 0.00    |
| brain_disease_caregiver      | (Intercept)       | 1.44     | 0.02      | 68.88     | 0.00    |
|                              | Yes               | 0.23     | 0.03      | 7.25      | 0.00    |
| brain_research_participation | (Intercept)       | 1.51     | 0.02      | 72.60     | 0.00    |
|                              | Yes               | 0.10     | 0.03      | 3.06      | 0.00    |
| relationship                 | (Intercept)       | 1.53     | 0.02      | 64.47     | 0.00    |
|                              | Stable            | 0.03     | 0.03      | 1.07      | 0.29    |

## 3.1.10 Question 3: binary - Cancer

| fct                          | term              | estimate | std.error | statistic | p.value |
|------------------------------|-------------------|----------|-----------|-----------|---------|
|                              | (Intercept)       | -0.92    | 0.02      | -46.91    | 0.00    |
| age                          | 41-60             | 0.26     | 0.03      | 9.11      | 0.00    |
|                              | <= 40             | 0.44     | 0.04      | 12.00     | 0.00    |
| education                    | (Intercept)       | -0.66    | 0.02      | -42.71    | 0.00    |
|                              | Lower             | -0.31    | 0.03      | -10.70    | 0.00    |
| gender                       | (Intercept)       | -0.67    | 0.02      | -44.48    | 0.00    |
|                              | Man               | -0.28    | 0.03      | -9.47     | 0.00    |
|                              | Other/Undisclosed | 0.15     | 0.18      | 0.82      | 0.41    |
| healthcare_experience        | (Intercept)       | -0.97    | 0.02      | -56.53    | 0.00    |
|                              | Yes               | 0.56     | 0.03      | 21.18     | 0.00    |
| cognitive_health             | (Intercept)       | -0.74    | 0.01      | -55.40    | 0.00    |
|                              | Below average     | -0.19    | 0.06      | -3.45     | 0.00    |
| mental_health                | (Intercept)       | -0.76    | 0.01      | -54.68    | 0.00    |
|                              | Below average     | 0.09     | 0.04      | 2.29      | 0.02    |
| illness_experience           | (Intercept)       | -0.80    | 0.02      | -47.23    | 0.00    |
|                              | Yes               | 0.12     | 0.03      | 4.61      | 0.00    |
| brain_disease_caregiver      | (Intercept)       | -0.86    | 0.02      | -47.50    | 0.00    |
|                              | Yes               | 0.23     | 0.03      | 8.84      | 0.00    |
| brain_research_participation | (Intercept)       | -0.81    | 0.02      | -46.92    | 0.00    |
|                              | Yes               | 0.15     | 0.03      | 5.82      | 0.00    |
| relationship                 | (Intercept)       | -0.75    | 0.02      | -38.60    | 0.00    |
|                              | Stable            | 0.01     | 0.03      | 0.24      | 0.81    |

## 3.1.11 Question 3: binary - Hypertension

| fct                          | term              | estimate | std.error | statistic | p.value |
|------------------------------|-------------------|----------|-----------|-----------|---------|
|                              | (Intercept)       | -0.66    | 0.02      | -35.09    | 0.00    |
| age                          | 41-60             | -0.12    | 0.03      | -4.33     | 0.00    |
|                              | <= 40             | -0.42    | 0.04      | -10.84    | 0.00    |
| education                    | (Intercept)       | -0.69    | 0.02      | -44.50    | 0.00    |
|                              | Lower             | -0.26    | 0.03      | -9.25     | 0.00    |
| gender                       | (Intercept)       | -0.67    | 0.02      | -44.65    | 0.00    |
|                              | Man               | -0.34    | 0.03      | -11.55    | 0.00    |
|                              | Other/Undisclosed | 0.32     | 0.18      | 1.77      | 0.08    |
| healthcare_experience        | (Intercept)       | -1.10    | 0.02      | -62.05    | 0.00    |
|                              | Yes               | 0.80     | 0.03      | 30.39     | 0.00    |
| cognitive_health             | (Intercept)       | -0.76    | 0.01      | -56.94    | 0.00    |
|                              | Below average     | -0.11    | 0.06      | -1.95     | 0.05    |
| mental_health                | (Intercept)       | -0.74    | 0.01      | -53.62    | 0.00    |
|                              | Below average     | -0.19    | 0.04      | -4.82     | 0.00    |
| illness_experience           | (Intercept)       | -0.84    | 0.02      | -49.49    | 0.00    |
|                              | Yes               | 0.18     | 0.03      | 7.04      | 0.00    |
| brain_disease_caregiver      | (Intercept)       | -0.97    | 0.02      | -52.58    | 0.00    |
|                              | Yes               | 0.42     | 0.03      | 16.24     | 0.00    |
| brain_research_participation | (Intercept)       | -0.86    | 0.02      | -48.95    | 0.00    |
|                              | Yes               | 0.20     | 0.03      | 7.80      | 0.00    |
| relationship                 | (Intercept)       | -0.81    | 0.02      | -41.17    | 0.00    |
|                              | Stable            | 0.08     | 0.03      | 2.96      | 0.00    |

## 3.1.12 Question 3: binary - Diabetes

| fct                          | term              | estimate | std.error | statistic | p.value |
|------------------------------|-------------------|----------|-----------|-----------|---------|
|                              | (Intercept)       | -1.71    | 0.02      | -69.58    | 0.00    |
| age                          | 41-60             | 0.14     | 0.04      | 4.01      | 0.00    |
|                              | <= 40             | -0.04    | 0.05      | -0.91     | 0.36    |
| education                    | (Intercept)       | -1.56    | 0.02      | -81.30    | 0.00    |
|                              | Lower             | -0.36    | 0.04      | -9.50     | 0.00    |
| gender                       | (Intercept)       | -1.61    | 0.02      | -83.95    | 0.00    |
|                              | Man               | -0.22    | 0.04      | -5.85     | 0.00    |
|                              | Other/Undisclosed | 0.53     | 0.21      | 2.59      | 0.01    |
| healthcare_experience        | (Intercept)       | -2.13    | 0.02      | -85.37    | 0.00    |
|                              | Yes               | 1.00     | 0.03      | 29.61     | 0.00    |
| cognitive_health             | (Intercept)       | -1.66    | 0.02      | -97.96    | 0.00    |
|                              | Below average     | -0.02    | 0.07      | -0.27     | 0.79    |
| mental_health                | (Intercept)       | -1.64    | 0.02      | -93.62    | 0.00    |
|                              | Below average     | -0.19    | 0.05      | -3.63     | 0.00    |
| illness_experience           | (Intercept)       | -1.76    | 0.02      | -79.82    | 0.00    |
|                              | Yes               | 0.23     | 0.03      | 6.82      | 0.00    |
| brain_disease_caregiver      | (Intercept)       | -1.85    | 0.02      | -76.95    | 0.00    |
|                              | Yes               | 0.38     | 0.03      | 11.36     | 0.00    |
| brain_research_participation | (Intercept)       | -1.75    | 0.02      | -77.66    | 0.00    |
|                              | Yes               | 0.18     | 0.03      | 5.48      | 0.00    |
| relationship                 | (Intercept)       | -1.66    | 0.02      | -67.06    | 0.00    |
|                              | Stable            | -0.01    | 0.03      | -0.16     | 0.87    |

## 3.1.13 Question 3: binary - Arthritis

| fct                          | term              | estimate | std.error | statistic | p.value |
|------------------------------|-------------------|----------|-----------|-----------|---------|
|                              | (Intercept)       | -3.05    | 0.04      | -71.56    | 0.00    |
| age                          | 41-60             | 0.14     | 0.06      | 2.28      | 0.02    |
|                              | <= 40             | 0.01     | 0.08      | 0.11      | 0.91    |
| education                    | (Intercept)       | -2.97    | 0.03      | -87.93    | 0.00    |
|                              | Lower             | -0.06    | 0.06      | -0.95     | 0.34    |
| gender                       | (Intercept)       | -2.92    | 0.03      | -90.08    | 0.00    |
|                              | Man               | -0.29    | 0.07      | -4.29     | 0.00    |
|                              | Other/Undisclosed | 0.23     | 0.37      | 0.62      | 0.54    |
| healthcare_experience        | (Intercept)       | -3.34    | 0.04      | -78.93    | 0.00    |
|                              | Yes               | 0.75     | 0.06      | 13.23     | 0.00    |
| cognitive_health             | (Intercept)       | -3.01    | 0.03      | -102.46   | 0.00    |
|                              | Below average     | 0.29     | 0.11      | 2.70      | 0.01    |
| mental_health                | (Intercept)       | -2.98    | 0.03      | -98.79    | 0.00    |
|                              | Below average     | -0.05    | 0.08      | -0.53     | 0.60    |
| illness_experience           | (Intercept)       | -3.20    | 0.04      | -79.49    | 0.00    |
|                              | Yes               | 0.47     | 0.06      | 8.25      | 0.00    |
| brain_disease_caregiver      | (Intercept)       | -3.12    | 0.04      | -76.19    | 0.00    |
|                              | Yes               | 0.26     | 0.06      | 4.67      | 0.00    |
| brain_research_participation | (Intercept)       | -3.01    | 0.04      | -79.67    | 0.00    |
|                              | Yes               | 0.04     | 0.06      | 0.65      | 0.52    |
| relationship                 | (Intercept)       | -2.90    | 0.04      | -71.01    | 0.00    |
|                              | Stable            | -0.16    | 0.06      | -2.84     | 0.00    |

# Lifefrain Global Brain Health Survey

for country: all

## Contents

|          |                                            |           |
|----------|--------------------------------------------|-----------|
| <b>1</b> | <b>Question 1</b>                          | <b>2</b>  |
| 1.1      | Overall . . . . .                          | 2         |
| 1.2      | Gender . . . . .                           | 3         |
| 1.3      | Age groups . . . . .                       | 4         |
| 1.4      | Education . . . . .                        | 5         |
| 1.5      | Country . . . . .                          | 6         |
| 1.6      | Health experience/education . . . . .      | 7         |
| 1.7      | Cognitive health . . . . .                 | 8         |
| 1.8      | Mental health . . . . .                    | 9         |
| 1.9      | Illness . . . . .                          | 10        |
| 1.10     | Brain disease care . . . . .               | 11        |
| 1.11     | Research participation . . . . .           | 12        |
| <b>2</b> | <b>Question 2</b>                          | <b>13</b> |
| 2.1      | Overall . . . . .                          | 13        |
| 2.2      | Gender . . . . .                           | 13        |
| 2.3      | Age groups . . . . .                       | 14        |
| 2.4      | Education . . . . .                        | 14        |
| 2.5      | Country . . . . .                          | 15        |
| 2.6      | Health experience/education . . . . .      | 16        |
| 2.7      | Cognitive health . . . . .                 | 17        |
| 2.8      | Mental health . . . . .                    | 17        |
| 2.9      | Illness . . . . .                          | 18        |
| 2.10     | Brain disease care . . . . .               | 18        |
| 2.11     | Research participation . . . . .           | 19        |
| <b>3</b> | <b>Question 3</b>                          | <b>20</b> |
| 3.1      | Overall . . . . .                          | 20        |
| 3.2      | Gender . . . . .                           | 21        |
| 3.3      | Age groups . . . . .                       | 22        |
| 3.4      | Education . . . . .                        | 23        |
| 3.5      | Country . . . . .                          | 24        |
| 3.6      | Health care experience/education . . . . . | 25        |
| 3.7      | Cognitive health . . . . .                 | 26        |
| 3.8      | Mental health . . . . .                    | 27        |
| 3.9      | Illness . . . . .                          | 28        |
| 3.10     | Brain disease care . . . . .               | 29        |
| 3.11     | Research participation . . . . .           | 30        |



# 1 Question 1

## 1.1 Overall

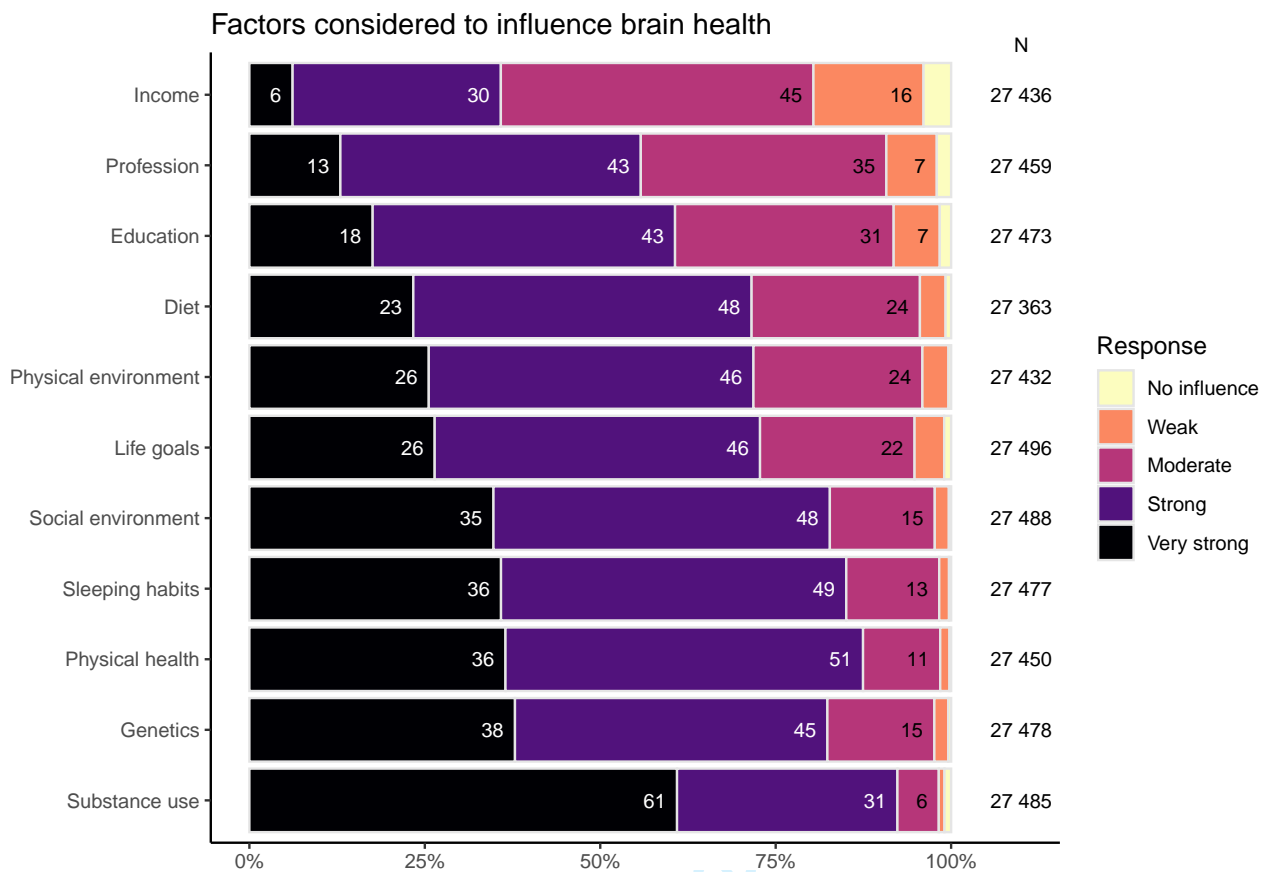

## 1.2 Gender

Factors considered to influence brain health  
by gender

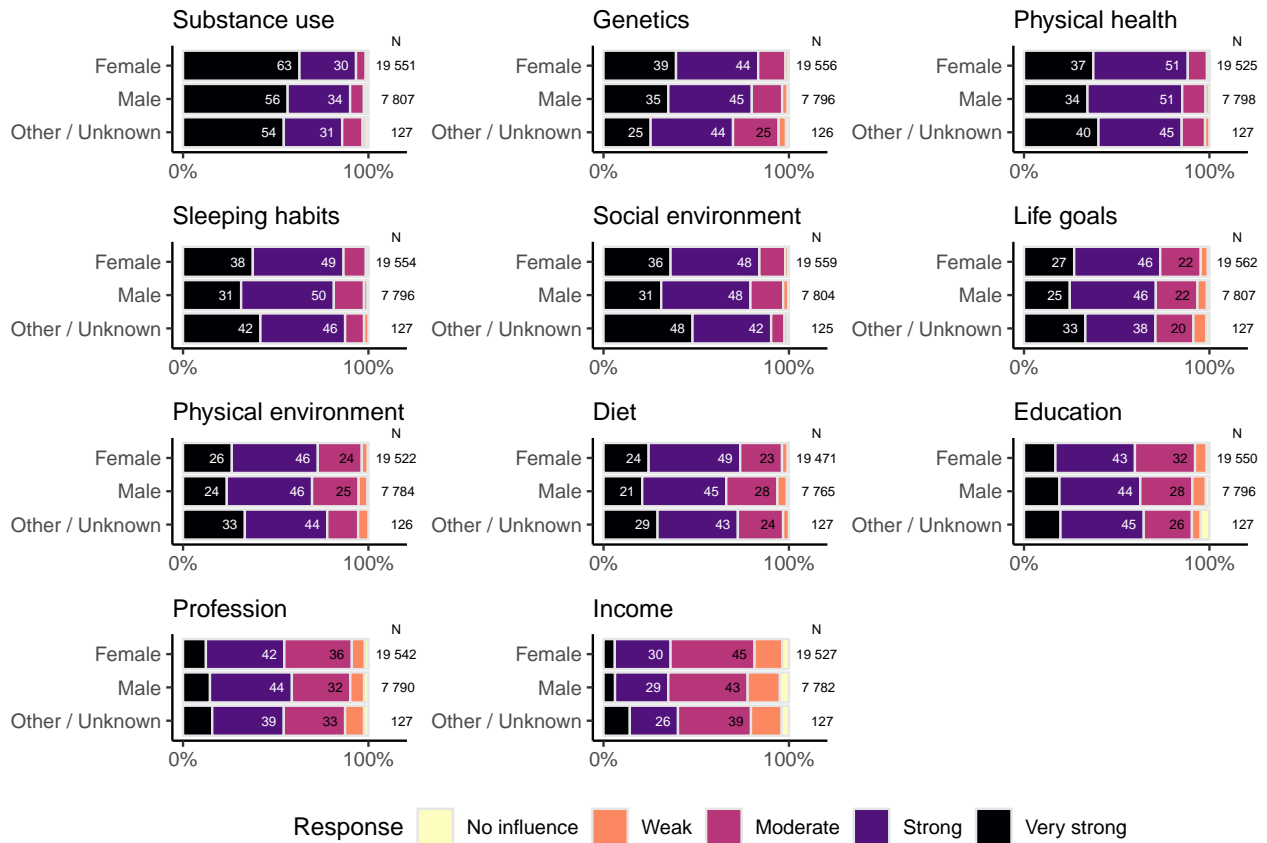

Question 1 asked respondents to rate on a 5-level likert-scale how strongly different life periods influence brain health. Here divided by respondent gender. Categories with less than 20% of the responses do not have percentages shown. Subplots are ordered by total rated importance across all groups. The number of male and female respondents differ between subplots due to missing answers.

### 1.3 Age groups

#### Factors considered to influence brain health by age groups

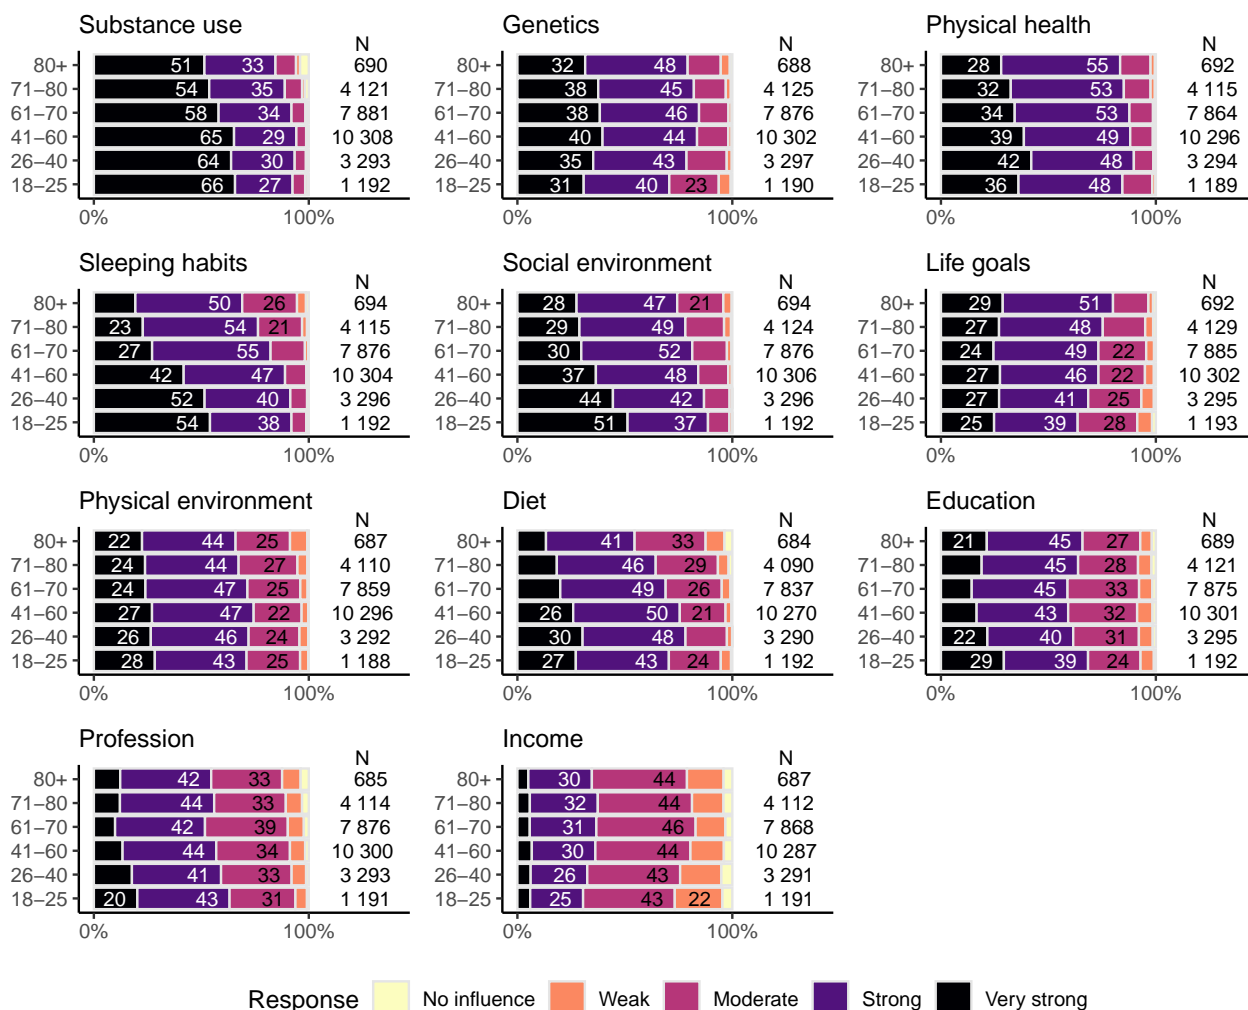

Question 1 asked respondents to rate on a 5-level likert-scale how strongly different life periods influence brain health. Here divided by respondent age group. Categories with less than 20% of the responses do not have percentages shown. Subplots are ordered by total rated importance across all groups

### 1.4 Education

Factors considered to influence brain health  
by educational level

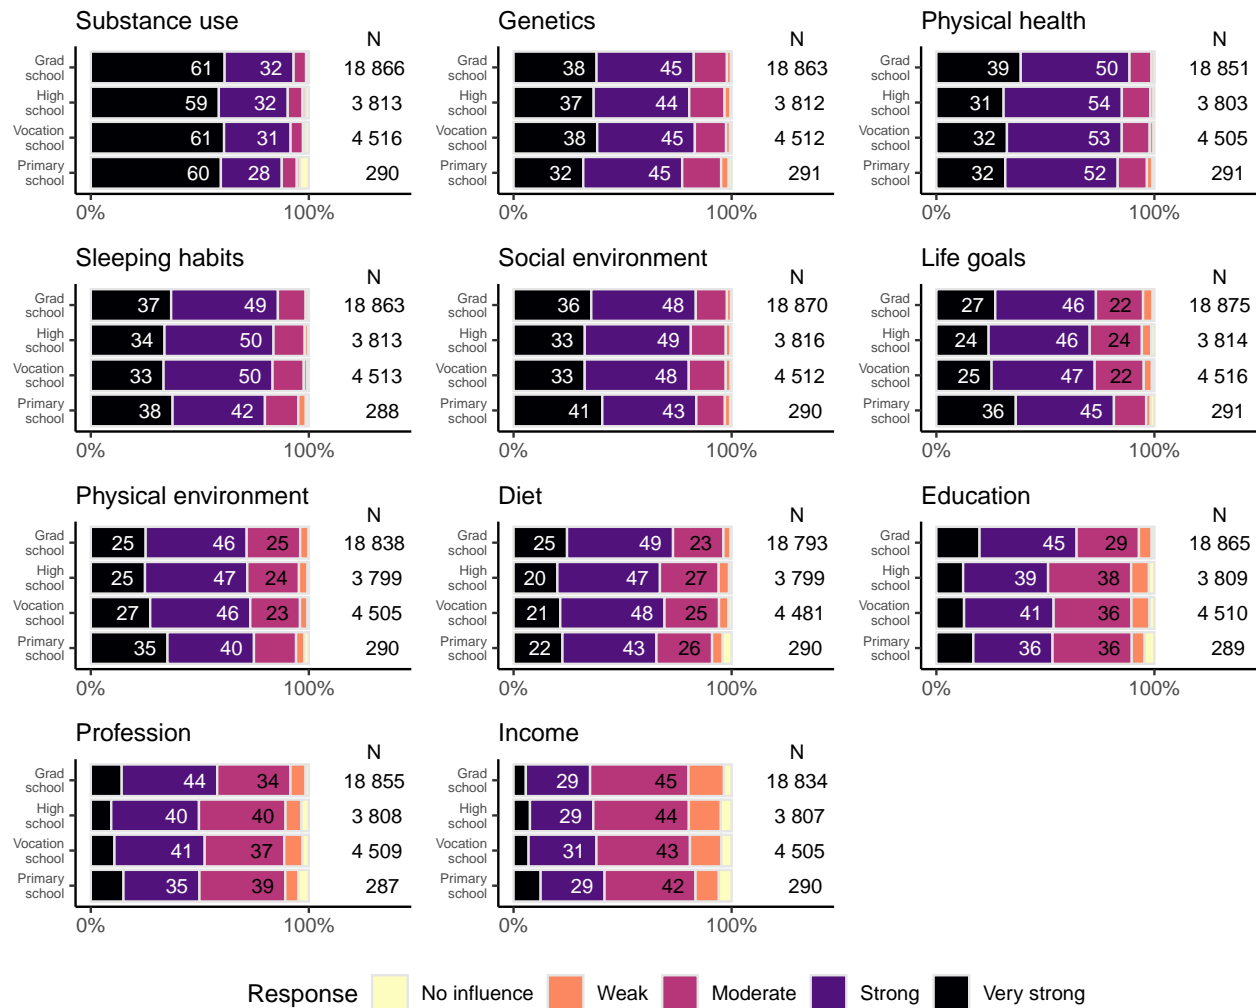

Question 1 asked respondents to rate on a 5-level likert-scale how strongly different life periods influence brain health. Here divided by respondent self-reported education level. Categories with less than 20% of the responses do not have percentages shown. Subplots are ordered by total rated importance across all groups

## 1.5 Country

### Factors considered to influence brain health by country of residence

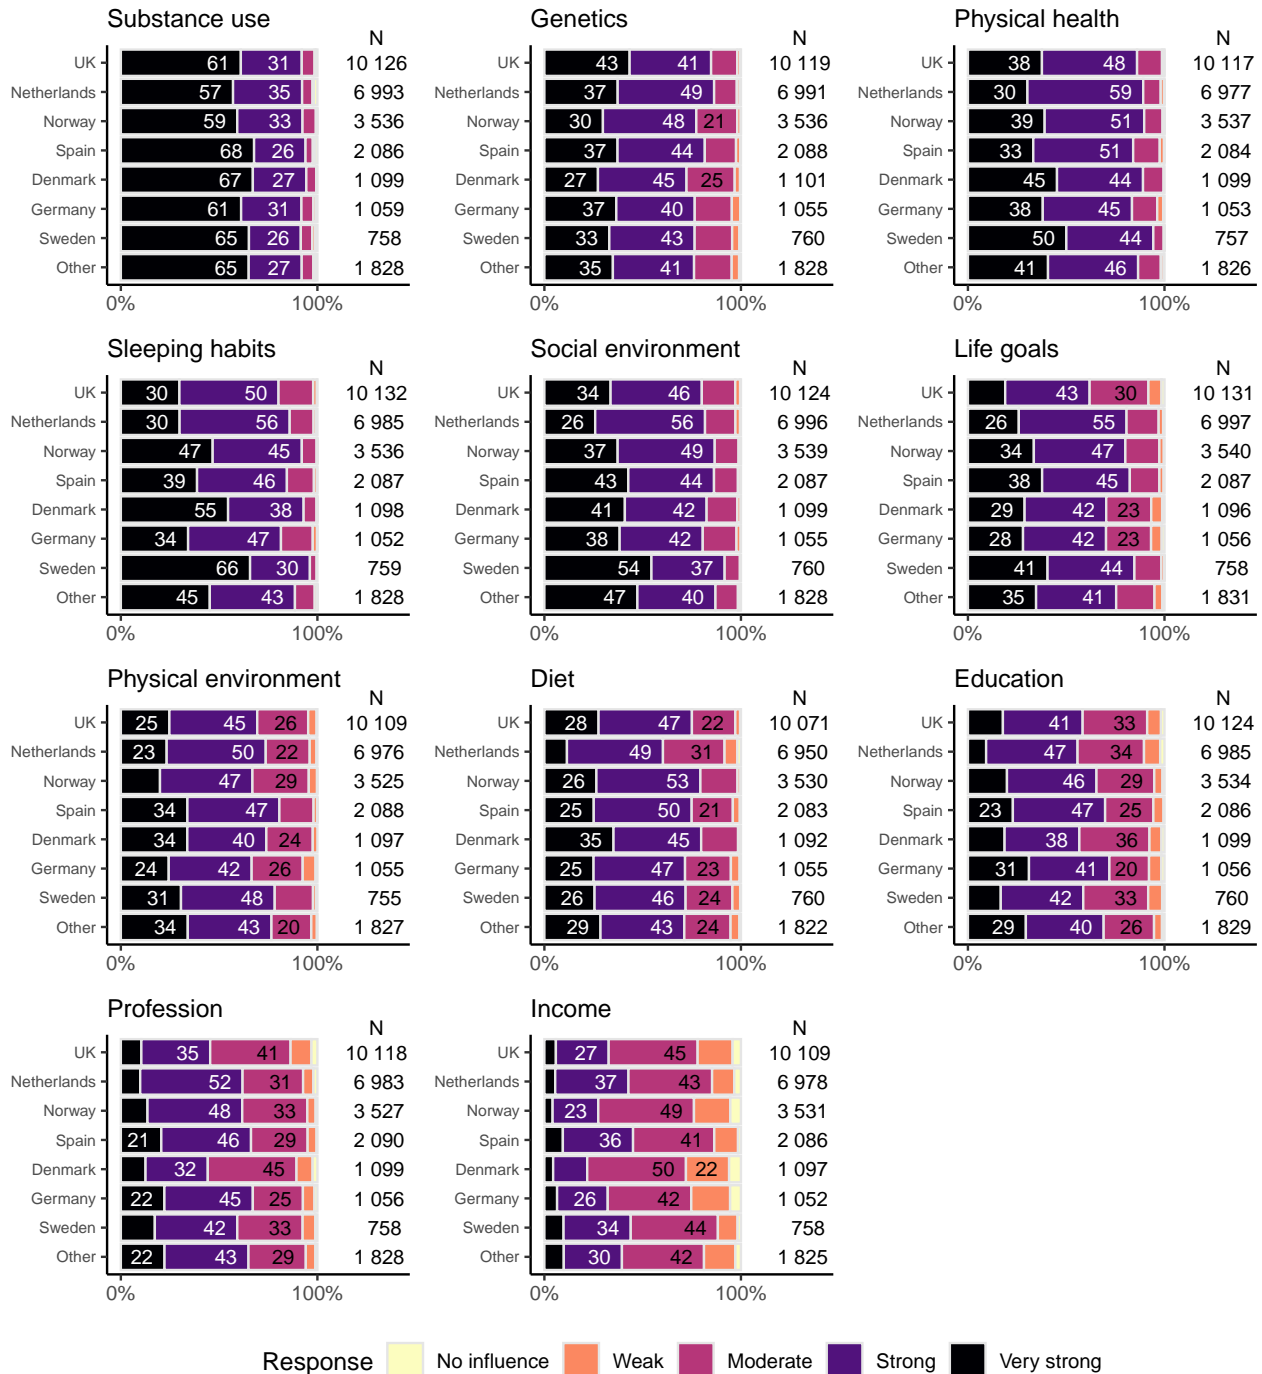

Question 1 asked respondents to rate on a 5-level likert-scale how strongly different life periods influence brain health. Here divided by respondent self-reported country of residence, showing the 7 with the most responses while all other countries are represented in 'Other'. Categories with less than 20% of the responses do not have percentages shown. Subplots are ordered by total rated importance across all groups

## 1.6 Health experience/education

### Factors considered to influence brain health

By reported education or work experience in health care

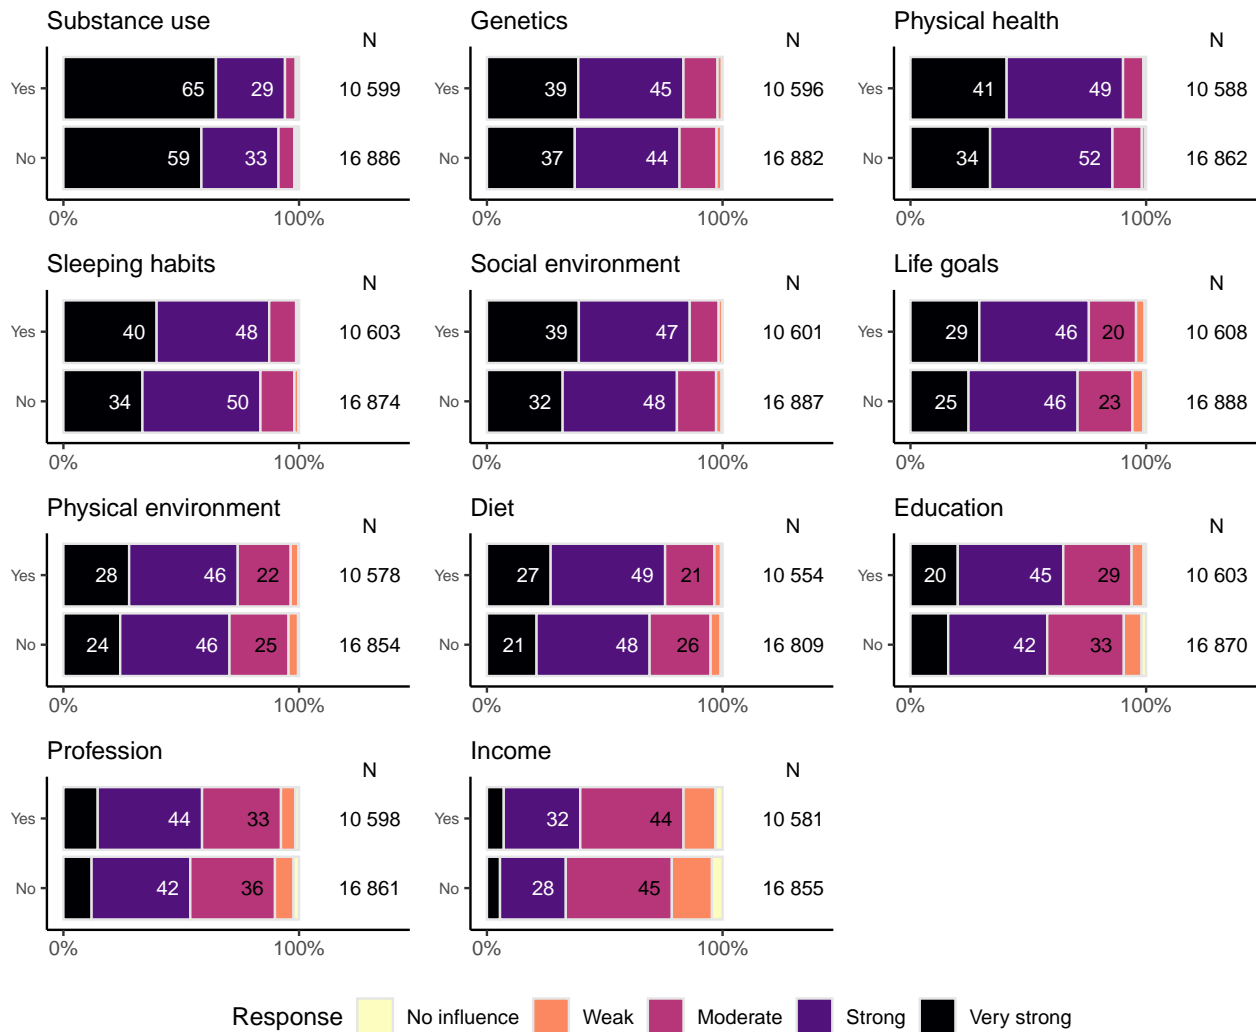

Question 1 asked respondents to rate on a 5-level likert-scale how strongly different life periods influence brain health. Here divided by having education or work experience in health care. Categories with less than 20% of the responses do not have percentages shown.

## 1.7 Cognitive health

Factors considered to influence brain health  
by self-reported rating of cognitive health

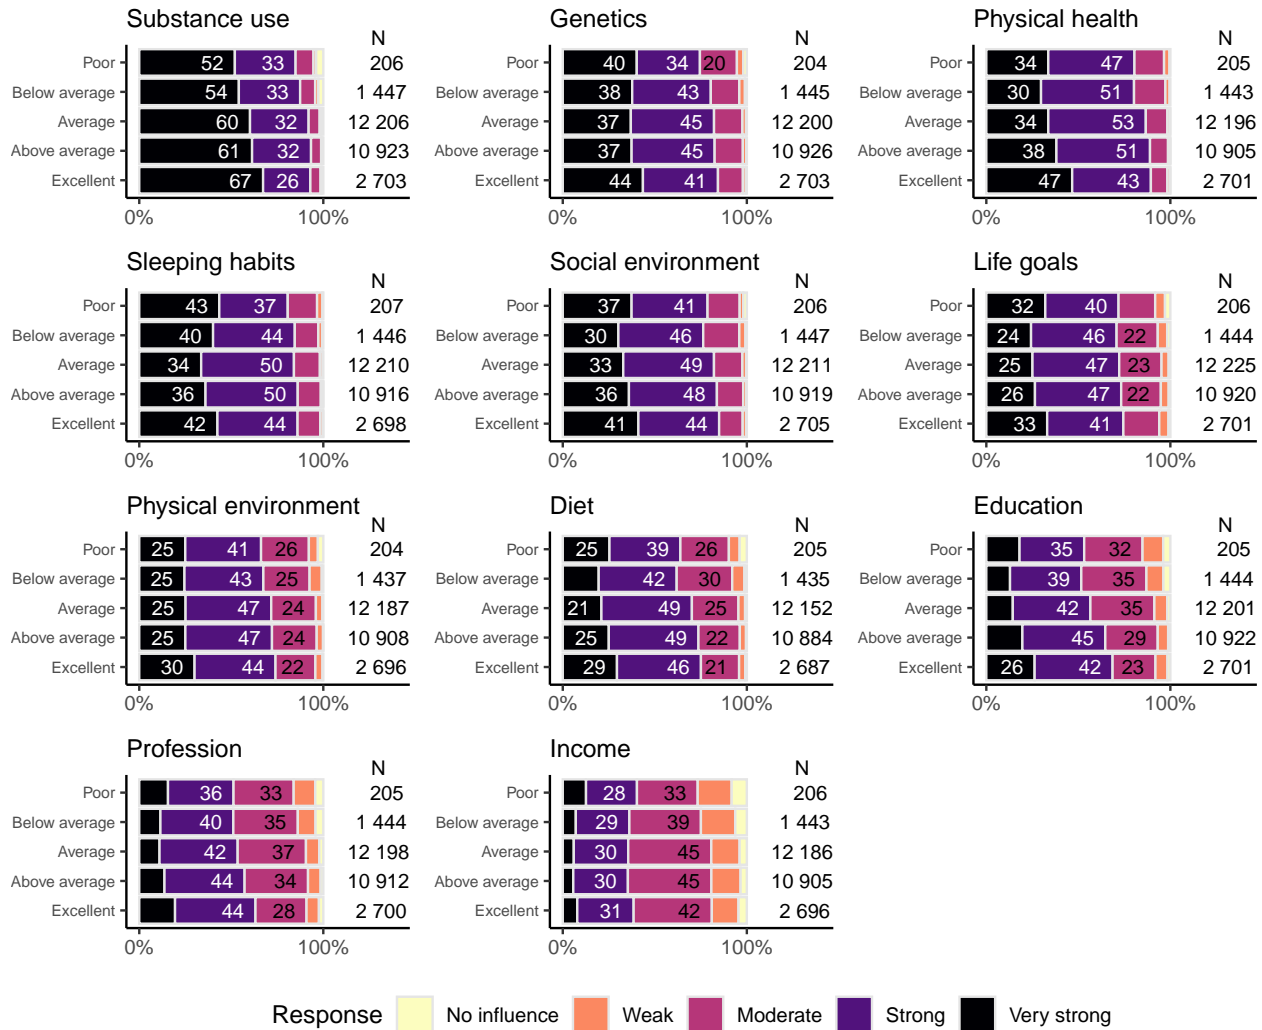

Question 1 asked respondents to rate on a 5-level likert-scale how strongly different life periods influence brain health. Here divided by self-reported rating of cognitive health. Categories with less than 20% of the responses do not have percentages shown.

## 1.8 Mental health

Factors considered to influence brain health  
by self-reported rating of mental health

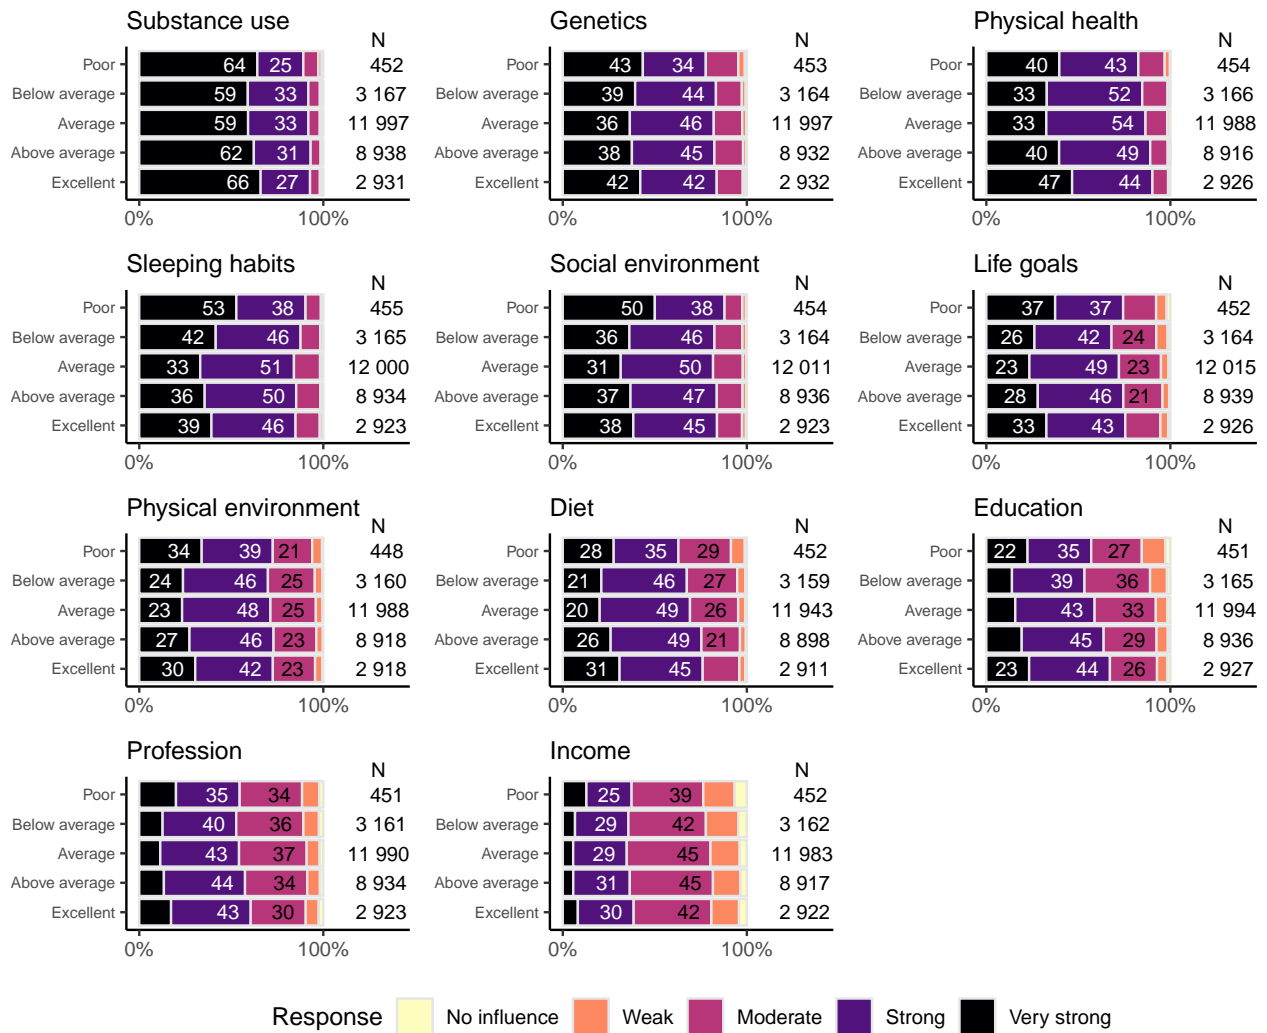

Question 1 asked respondents to rate on a 5-level likert-scale how strongly different life periods influence brain health. Here divided by self-reported rating of mental health. Categories with less than 20% of the responses do not have percentages shown.



### 1.9 Illness

#### Factors considered to influence brain health

by experience of long-standing illness, disability, or health problem

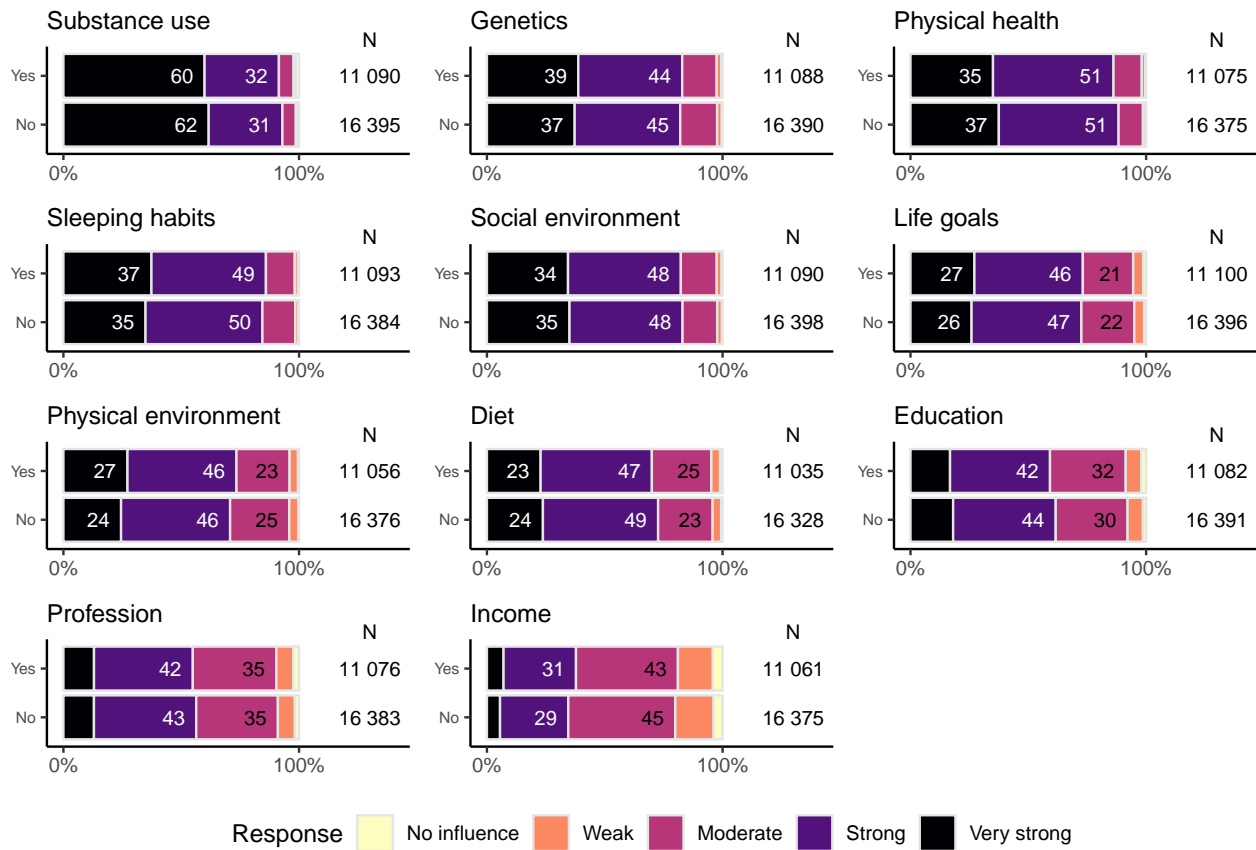

Question 1 asked respondents to rate on a 5-level likert-scale how strongly different life periods influence brain health. Here divided whether they had experience with long-standing illness, disability, or health problem. Categories with less than 20% of the responses do not have percentages shown.

Only

### 1.10 Brain disease care

#### Factors considered to influence brain health

by experience of taking care of family member with brain disease

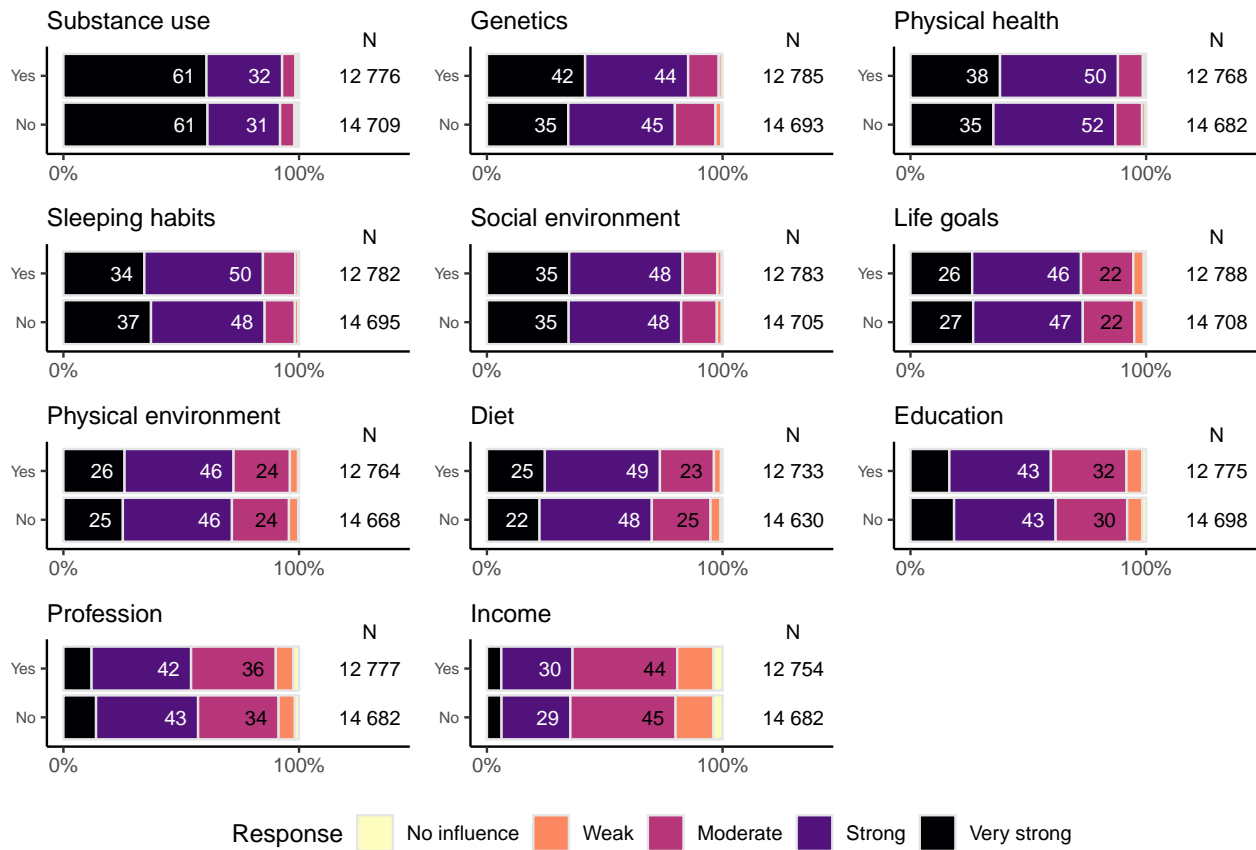

Question 1 asked respondents to rate on a 5-level likert-scale how strongly different life periods influence brain health. Here divided whether they had experience with looking after a member of family with brain disease. Categories with less than 20% of the responses do not have percentages shown.

Only

### 1.11 Research participation

#### Factors considered to influence brain health

By experience of brain research participation

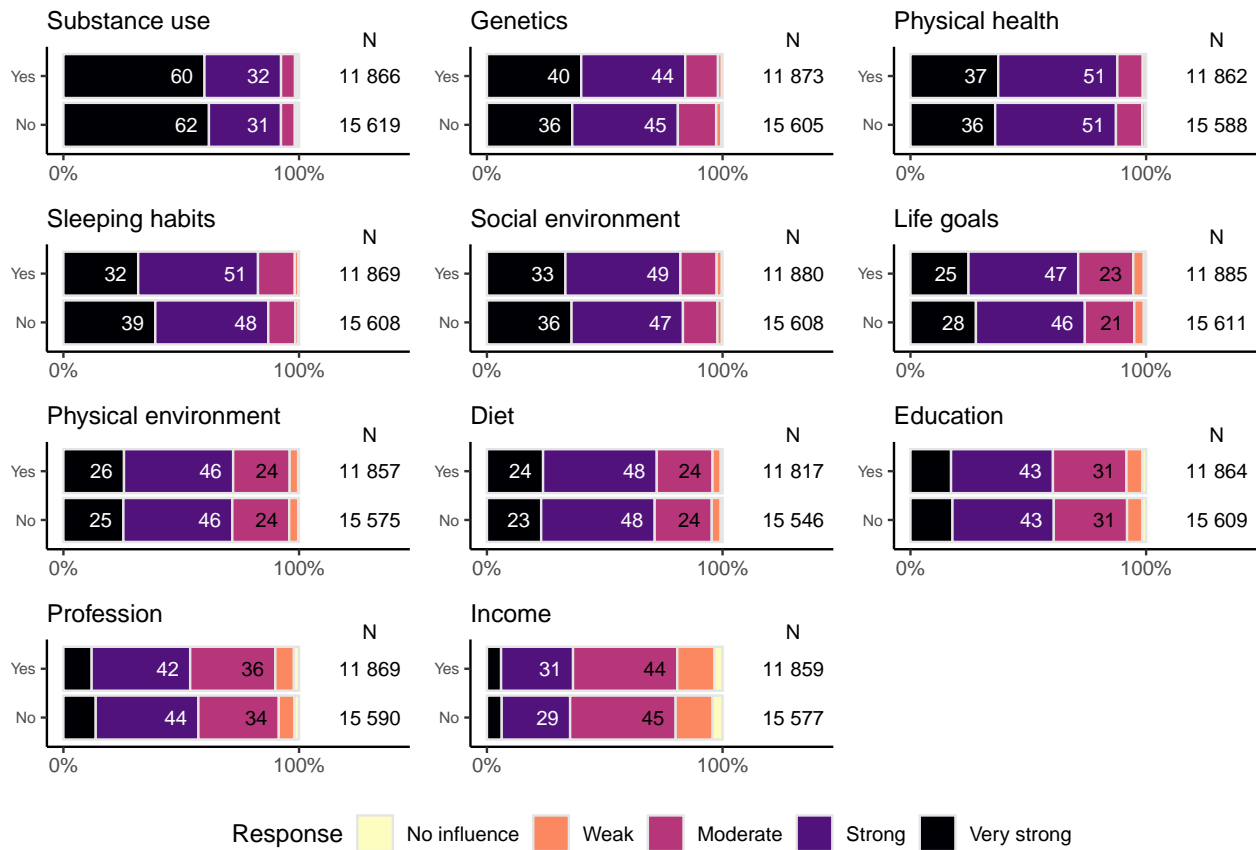

Question 1 asked respondents to rate on a 5-level likert-scale how strongly different life periods influence brain health. Here divided whether they have participated in brain research projects. Categories with less than 20% of the responses do not have percentages shown.

Only

## 2 Question 2

### 2.1 Overall

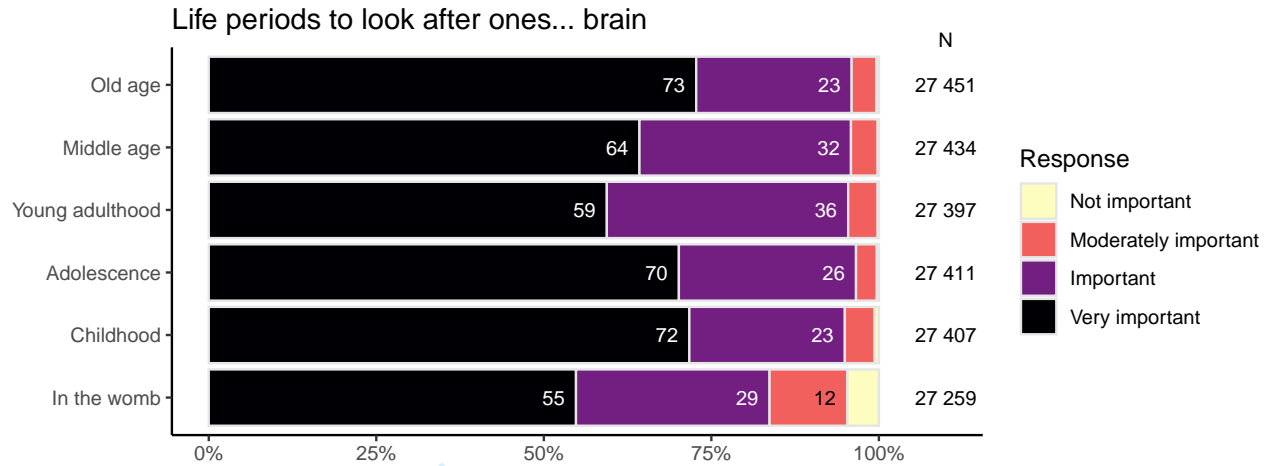

### 2.2 Gender

Life periods to look after ones... brain  
by gender

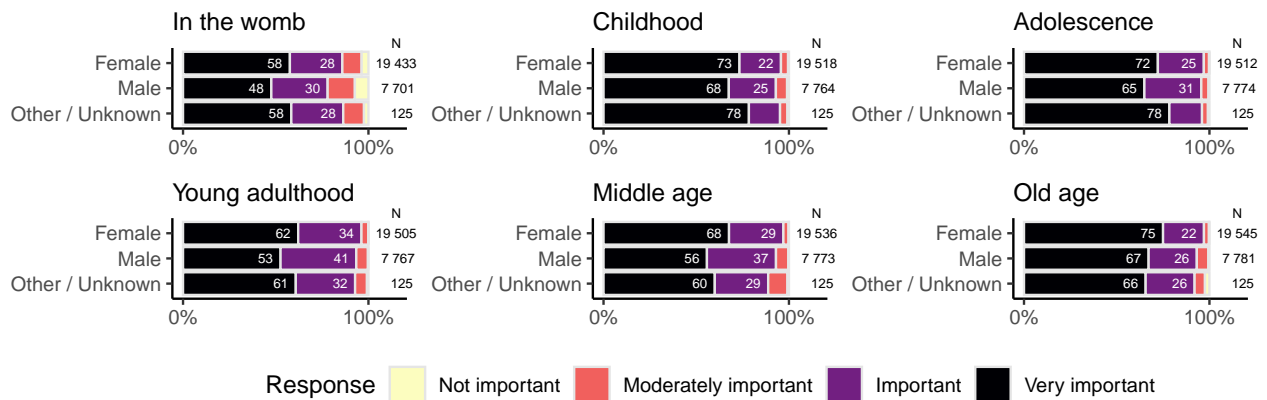

Question 2 asked respondents to rate on a 4...level scale at which life stages it is important to look after one's brain health. In the womb (before birth); Childhood (0–12 years); Adolescence (13–18 years); Young adulthood (19...45 years); Middle age (45–65 years); Old age (over 65 years) Here divided by respondent gender. Categories with less than 20% of the responses do not have percentages shown. Subplots are ordered by total rated importance across all groups. The number of male and female respondents differ between subplots due to missing answers.

### 2.3 Age groups

Life periods to look after ones... brain  
by age groups

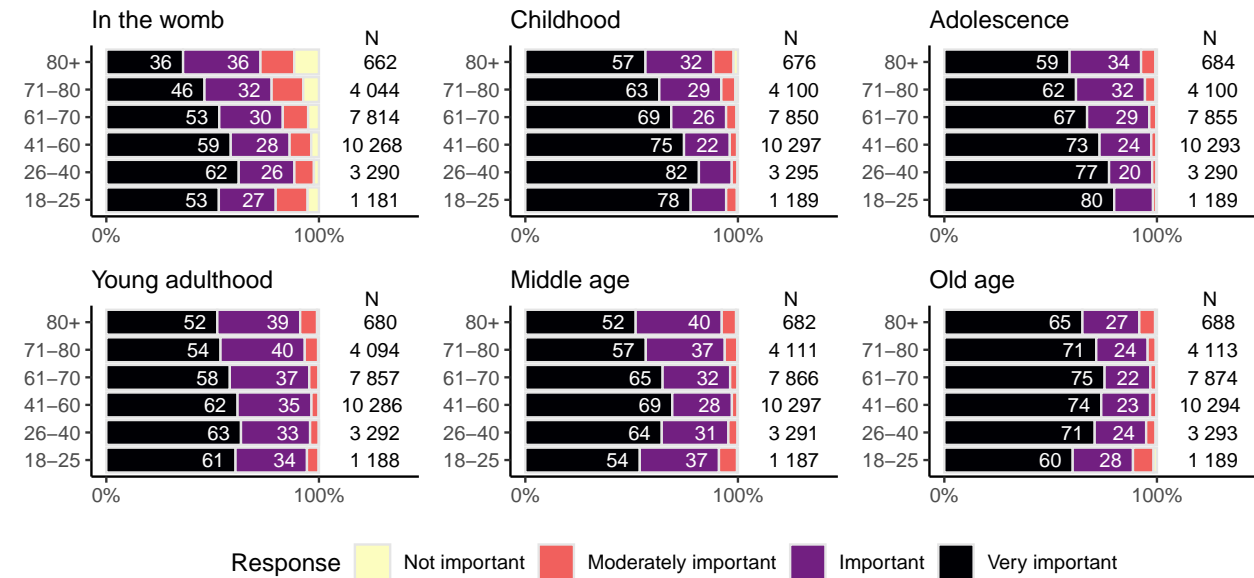

Question 2 asked respondents to rate on a 4...level scale at which life stages it is important to look after one's brain health. In the womb (before birth); Childhood (0-12 years); Adolescence (13-18 years); Young adulthood (19...45 years); Middle age (45-65 years); Old age (over 65 years) Here divided by respondent age group. Categories with less than 20% of the responses do not have percentages shown. Subplots are ordered by total rated importance across all groups

### 2.4 Education

Life periods to look after ones... brain  
by educational level

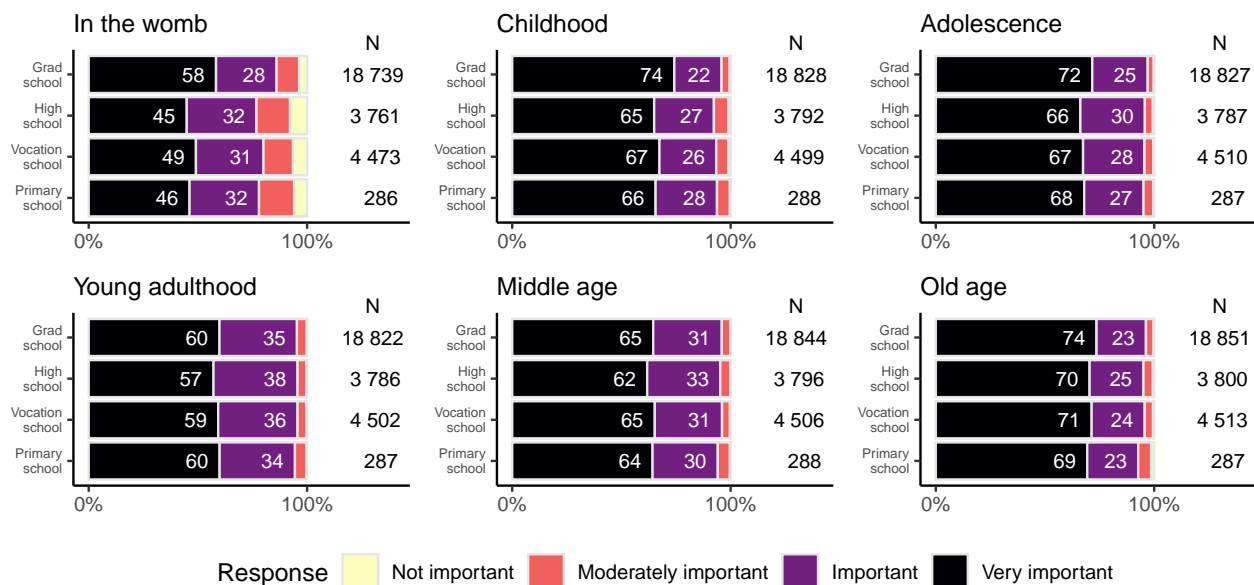

Question 2 asked respondents to rate on a 4...level scale at which life stages it is important to look after one's brain health. In the womb (before birth); Childhood (0-12 years); Adolescence (13-18 years); Young adulthood (19...45 years); Middle age (45-65 years); Old age (over 65 years) Here divided by respondent self-reported educational level. Categories with less than 20% of the responses do not have percentages shown. Subplots are ordered by total rated importance across all groups

## 2.5 Country

Life periods to look after ones... brain  
by country of residence

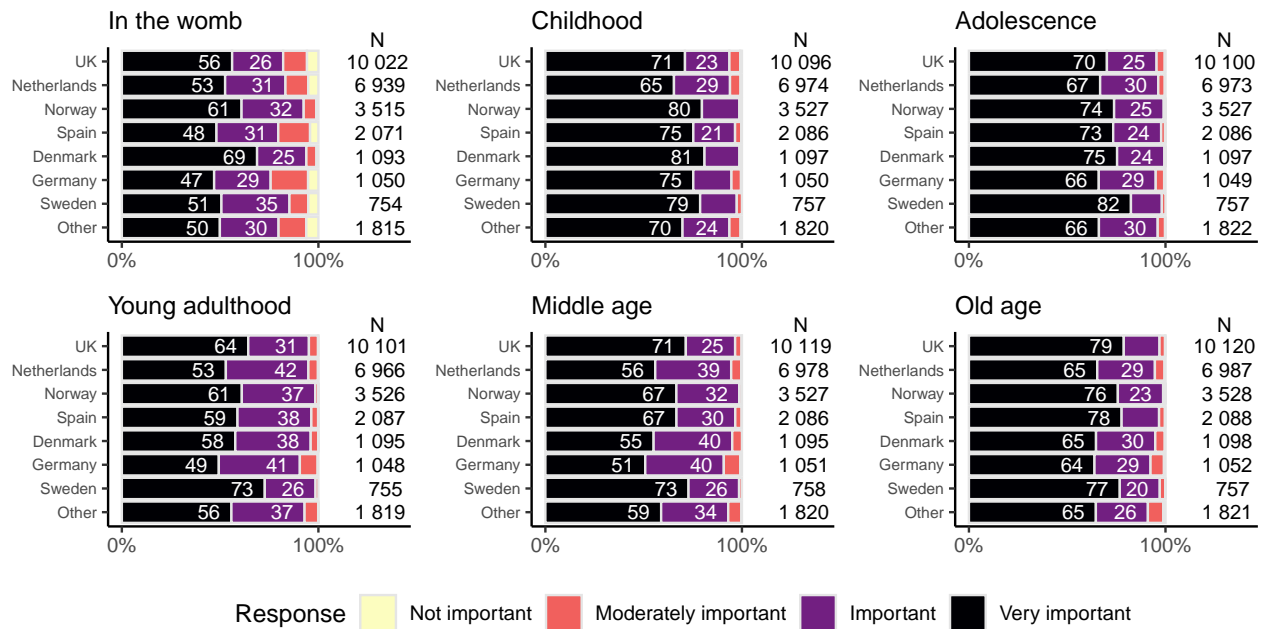

Question 2 asked respondents to rate on a 4...level scale at which life stages it is important to look after one's brain health. In the womb (before birth); Childhood (0–12 years); Adolescence (13–18 years); Young adulthood (19...45 years); Middle age (45–65 years); Old age (over 65 years) Here divided by respondent self-reported country of residence, showing the 7 with the most responses while all other countries are represented in 'Other'. Categories with less than 20% of the responses do not have percentages shown. Subplots are ordered by total rated importance across all groups

## 2.6 Health experience/education

### Life periods to look after ones... brain

By reported education or work experience in health care

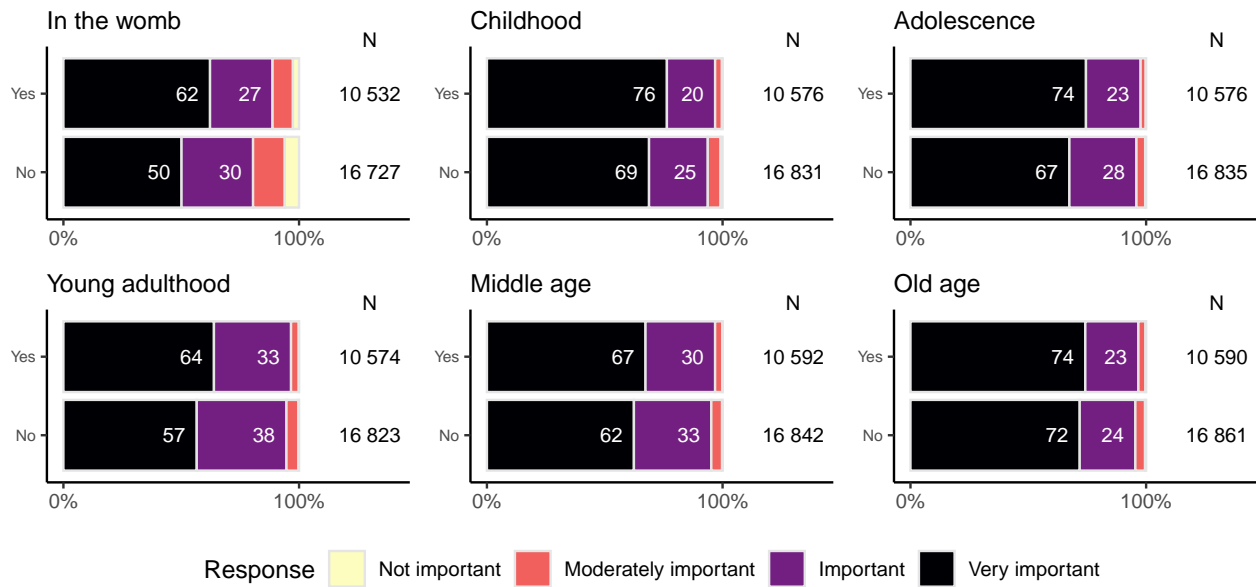

Question 2 asked respondents to rate on a 4...level scale at which life stages it is important to look after one's brain health. In the womb (before birth); Childhood (0–12 years); Adolescence (13–18 years); Young adulthood (19...45 years); Middle age (45–65 years); Old age (over 65 years) Here divided by having education or work experience in health care. Categories with less than 20% of the responses do not have percentages shown.

Review only

## 2.7 Cognitive health

Life periods to look after ones... brain  
by self-reported rating of cognitive health

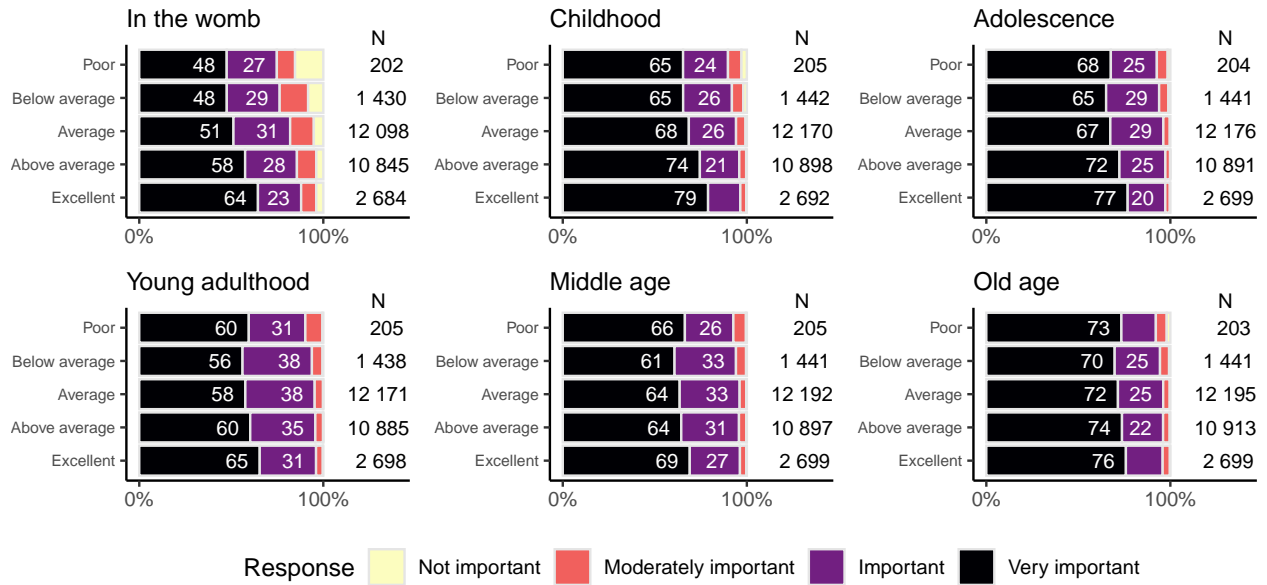

Question 2 asked respondents to rate on a 4...level scale at which life stages it is important to look after one's brain health. In the womb (before birth); Childhood (0–12 years); Adolescence (13–18 years); Young adulthood (19...45 years); Middle age (45–65 years); Old age (over 65 years) Here divided by self-reported rating of cognitive health. Categories with less than 20% of the responses do not have percentages shown.

## 2.8 Mental health

Life periods to look after ones... brain  
by self-reported rating of mental health

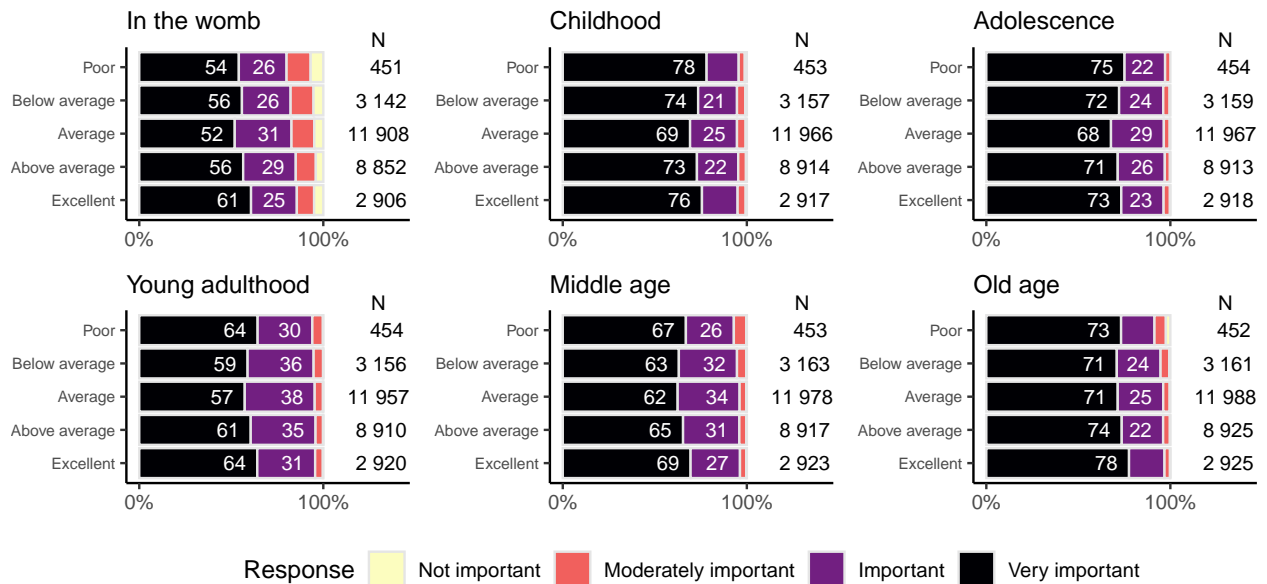

Question 2 asked respondents to rate on a 4...level scale at which life stages it is important to look after one's brain health. In the womb (before birth); Childhood (0–12 years); Adolescence (13–18 years); Young adulthood (19...45 years); Middle age (45–65 years); Old age (over 65 years) Here divided by self-reported rating of mental health. Categories with less than 20% of the responses do not have percentages shown.



## 2.9 Illness

### Life periods to look after ones... brain

by experience of long-standing illness, disability, or health problem

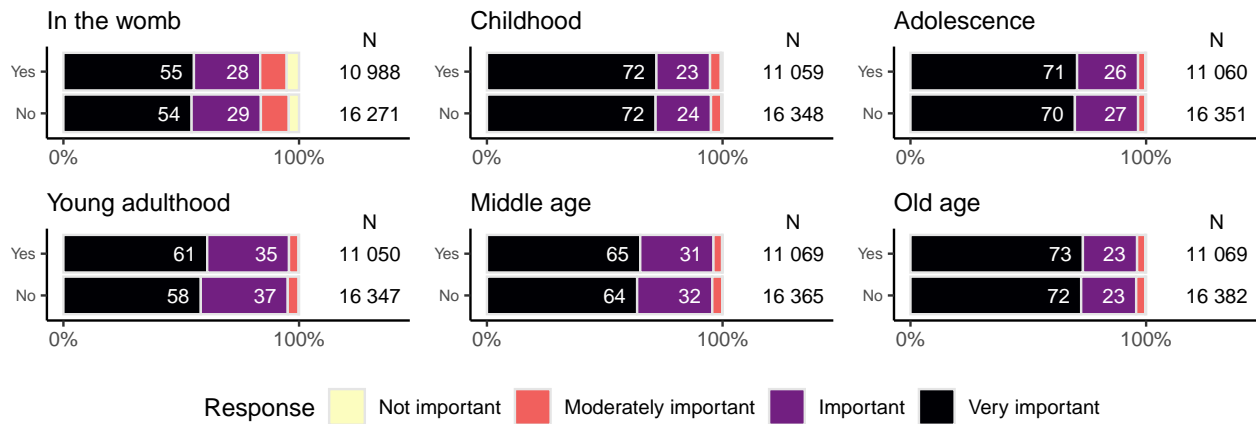

Question 2 asked respondents to rate on a 4...level scale at which life stages it is important to look after one's brain health. In the womb (before birth); Childhood (0–12 years); Adolescence (13–18 years); Young adulthood (19...45 years); Middle age (45–65 years); Old age (over 65 years) Here divided whether they had experience with long-standing illness, disability, or health problem. Categories with less than 20% of the responses do not have percentages shown.

## 2.10 Brain disease care

### Life periods to look after ones... brain

by experience of taking care of family member with brain disease

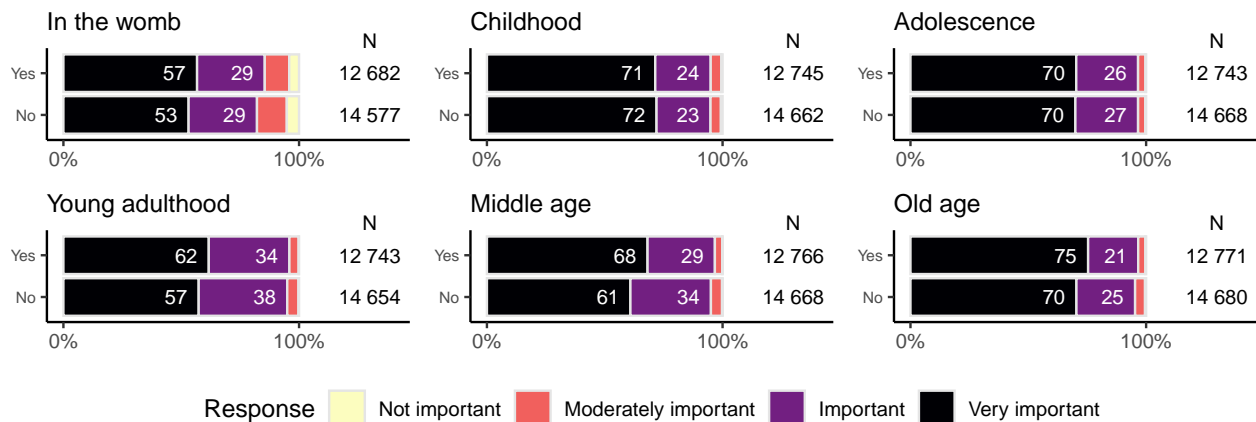

Question 2 asked respondents to rate on a 4...level scale at which life stages it is important to look after one's brain health. In the womb (before birth); Childhood (0–12 years); Adolescence (13–18 years); Young adulthood (19...45 years); Middle age (45–65 years); Old age (over 65 years) Here divided whether they had experience with looking after a member of family with brain disease. Categories with less than 20% of the responses do not have percentages shown.

## 2.11 Research participation

### Life periods to look after ones... brain

By experience of brain research participation

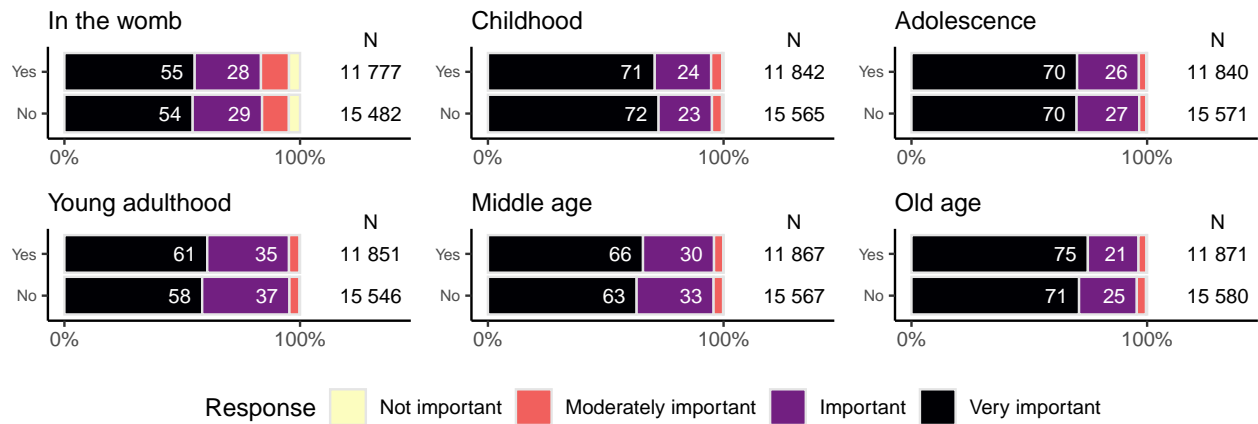

Question 2 asked respondents to rate on a 4...level scale at which life stages it is important to look after one's brain health. In the womb (before birth); Childhood (0–12 years); Adolescence (13–18 years); Young adulthood (19...45 years); Middle age (45–65 years); Old age (over 65 years) Here divided whether they have participated in brain research projects. Categories with less than 20% of the responses do not have percentages shown.

### 3 Question 3

#### 3.1 Overall

Diseases/disorders associated with the brain

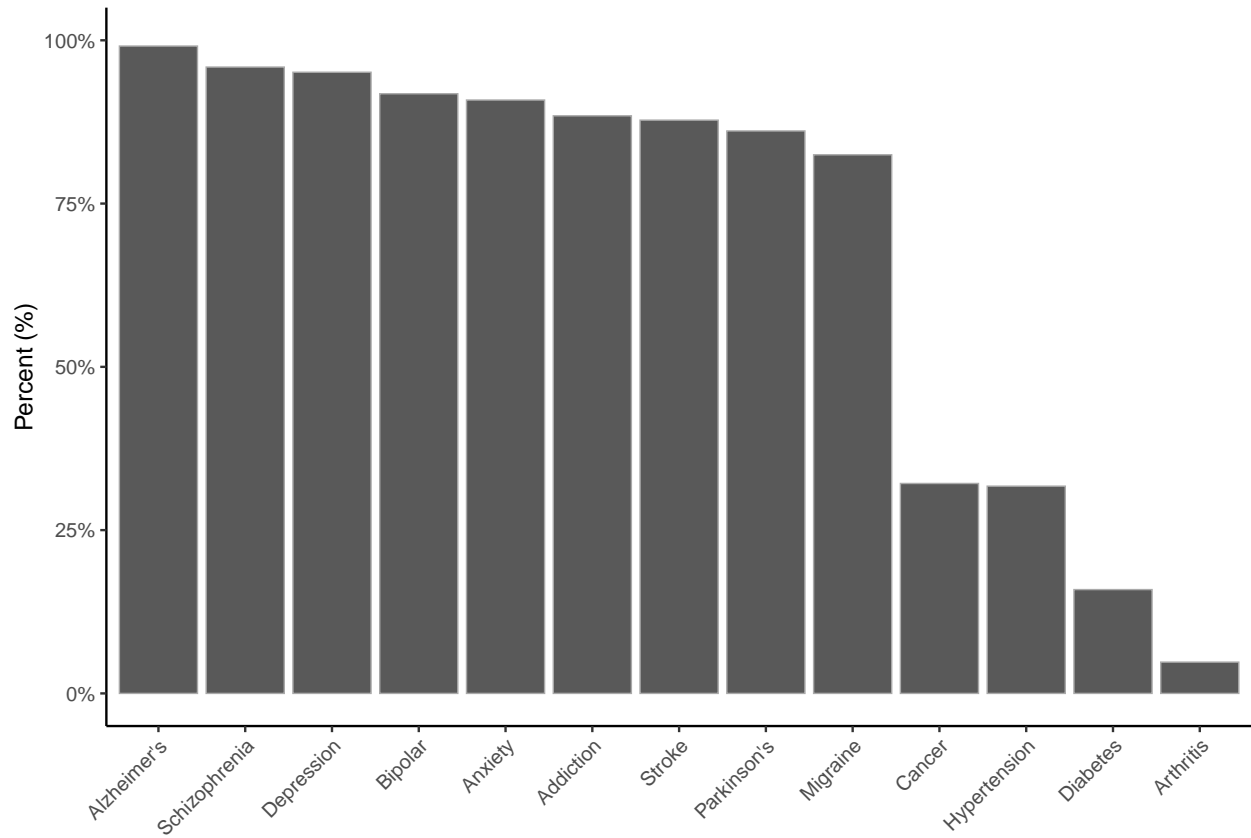

Respondents were given the option to tick boxes with the diseases presented above to indicate which ones they associated with the brain. They were allowed to select as many categories as they wished. The question was optional, and as such we present data from the 27 530 who responded to the question. We do not know if those who refrained from responding did so because they did not associate any of the diseases with the brain, or if they simply did not wish to respond.

### 3.2 Gender

Diseases/disorders associated with the brain  
by gender

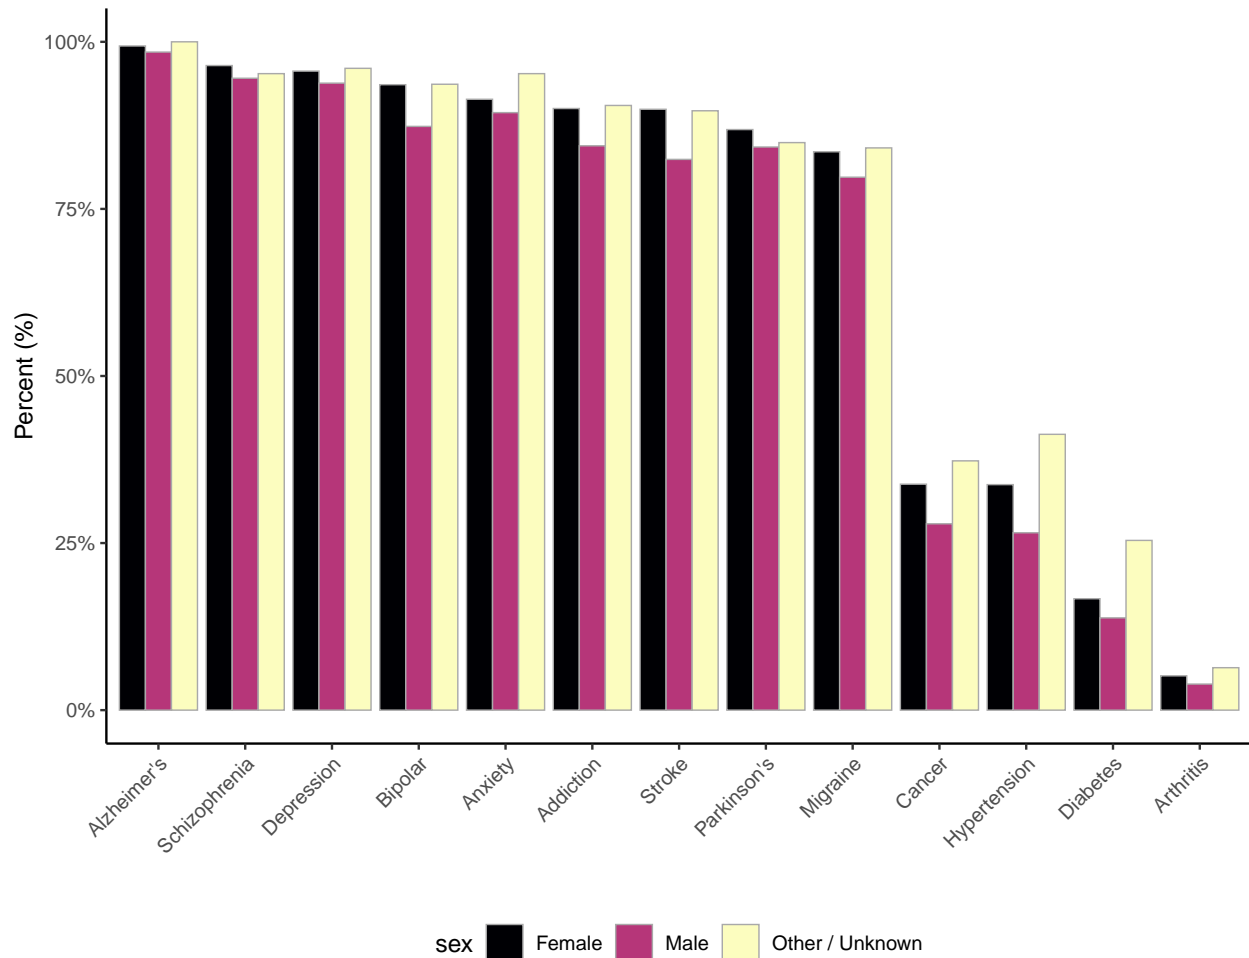

Respondents were given the option to tick boxes with the diseases presented above to indicate which ones they associated with the brain. They were allowed to select as many categories as they wished. The question was optional, and as such we present data from the 27 530 who responded to the question. We do not know if those who refrained from responding did so because they did not associate any of the diseases with the brain, or if they simply did not wish to respond. The number of male and female respondents differ between subplots due to missing answers.

### 3.3 Age groups

Diseases/disorders associated with the brain  
by age groups

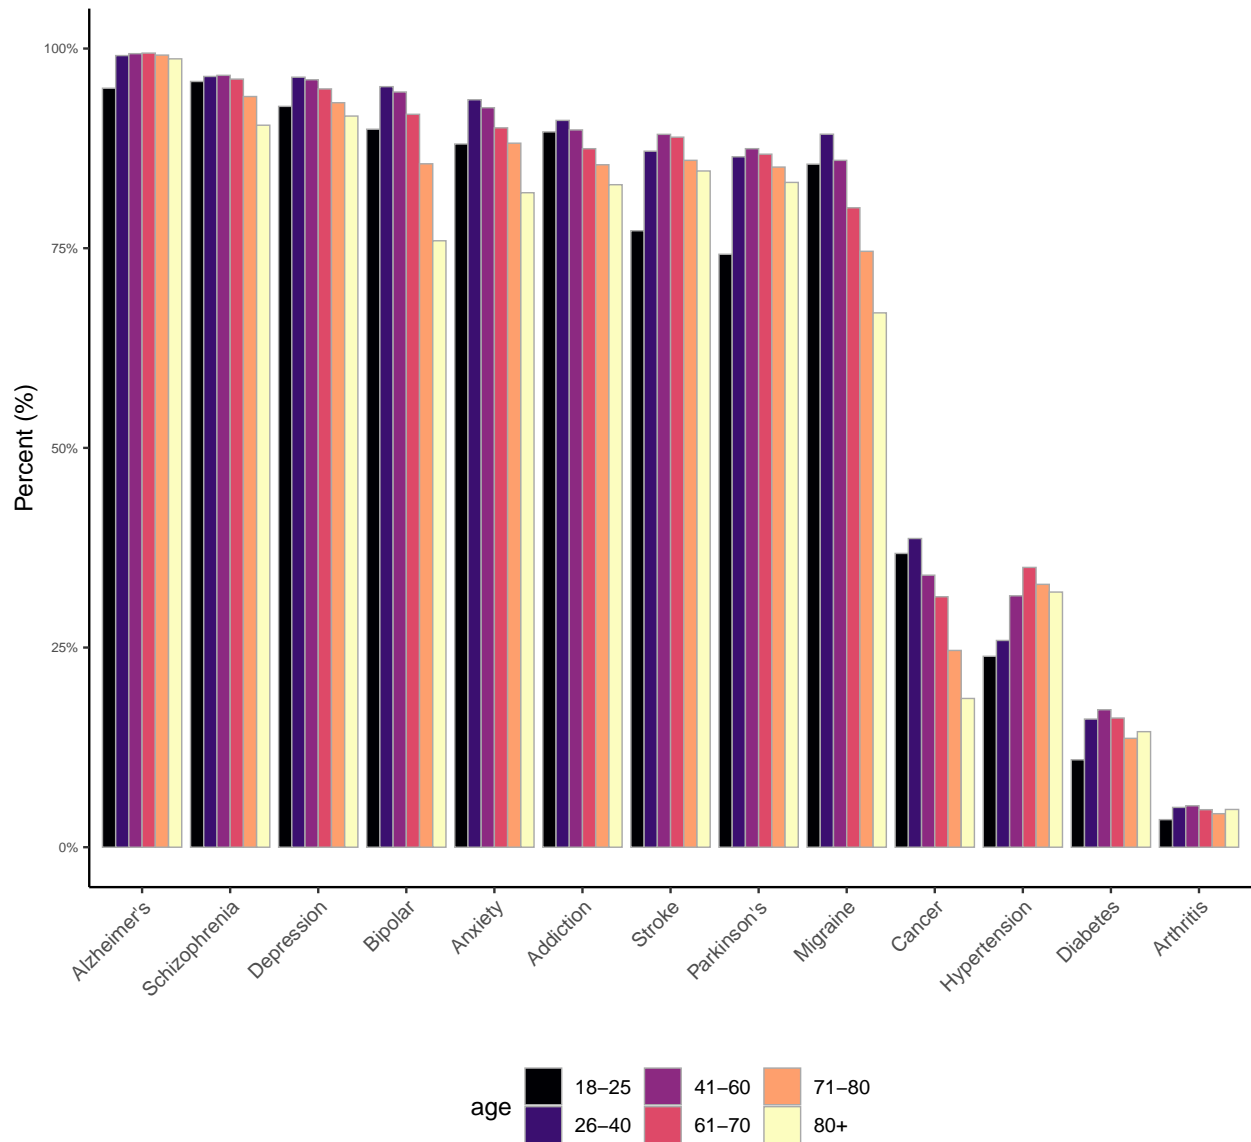

Respondents were given the option to tick boxes with the diseases presented above to indicate which ones they associated with the brain. They were allowed to select as many categories as they wished. The question was optional, and as such we present data from the 27 530 who responded to the question. We do not know if those who refrained from responding did so because they did not associate any of the diseases with the brain, or if they simply did not wish to respond.

### 3.4 Education

Diseases/disorders associated with the brain  
by education level

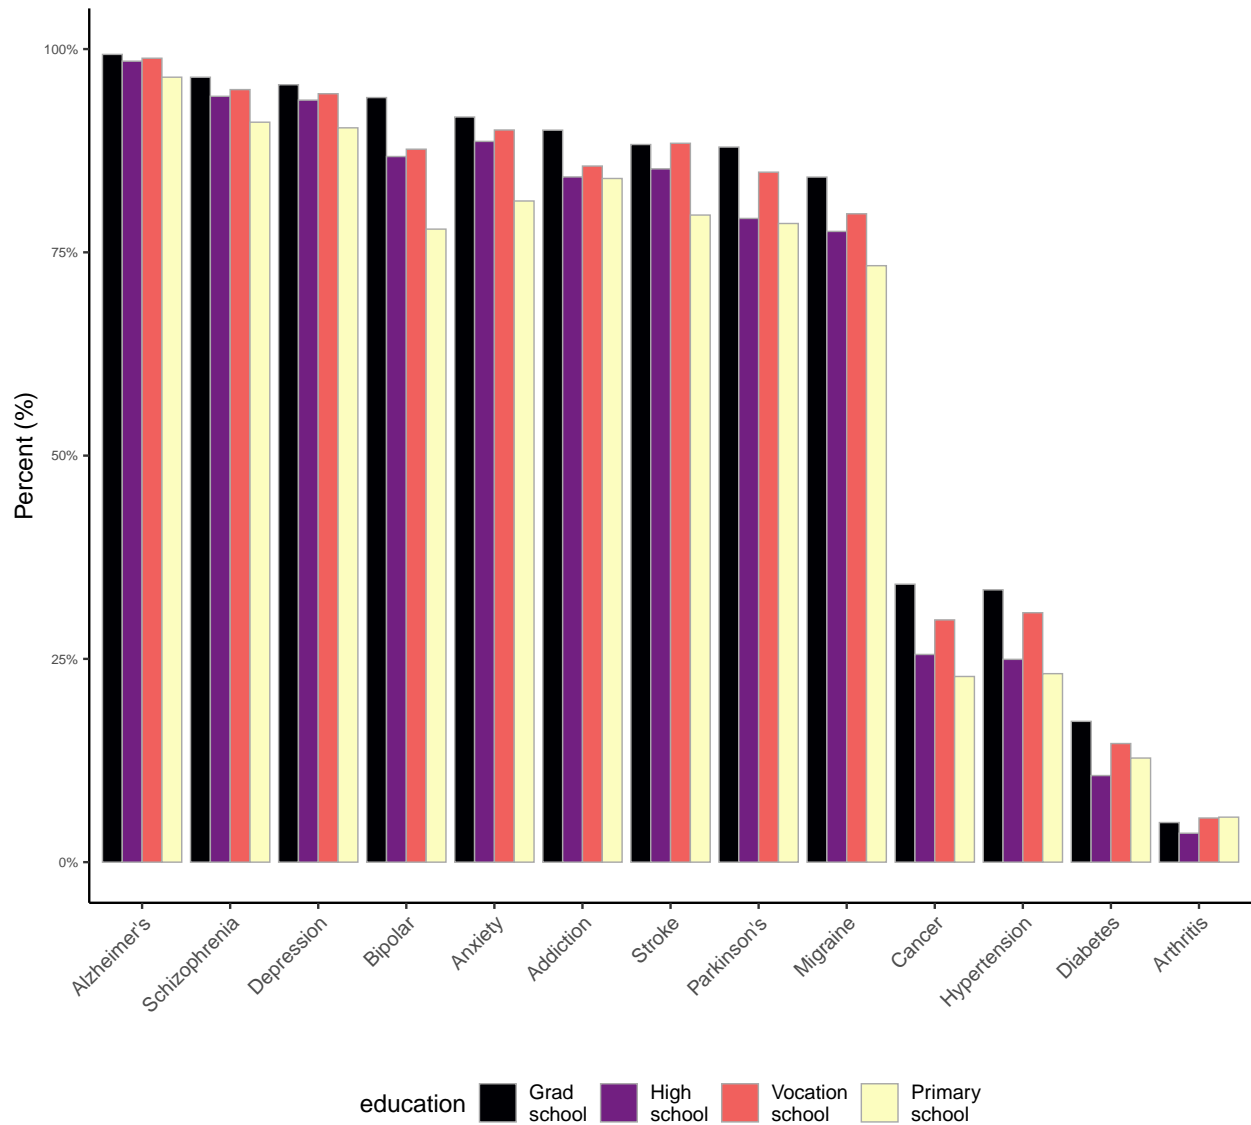

Respondents were given the option to tick boxes with the diseases presented above to indicate which ones they associated with the brain. They were allowed to select as many categories as they wished. The question was optional, and as such we present data from the 27 530 who responded to the question. We do not know if those who refrained from responding did so because they did not associate any of the diseases with the brain, or if they simply did not wish to respond. Percentages are added to clarify how large a porportion of the respondents associated the diseases with the brain.

### 3.5 Country

Diseases/disorders associated with the brain  
by country of residence

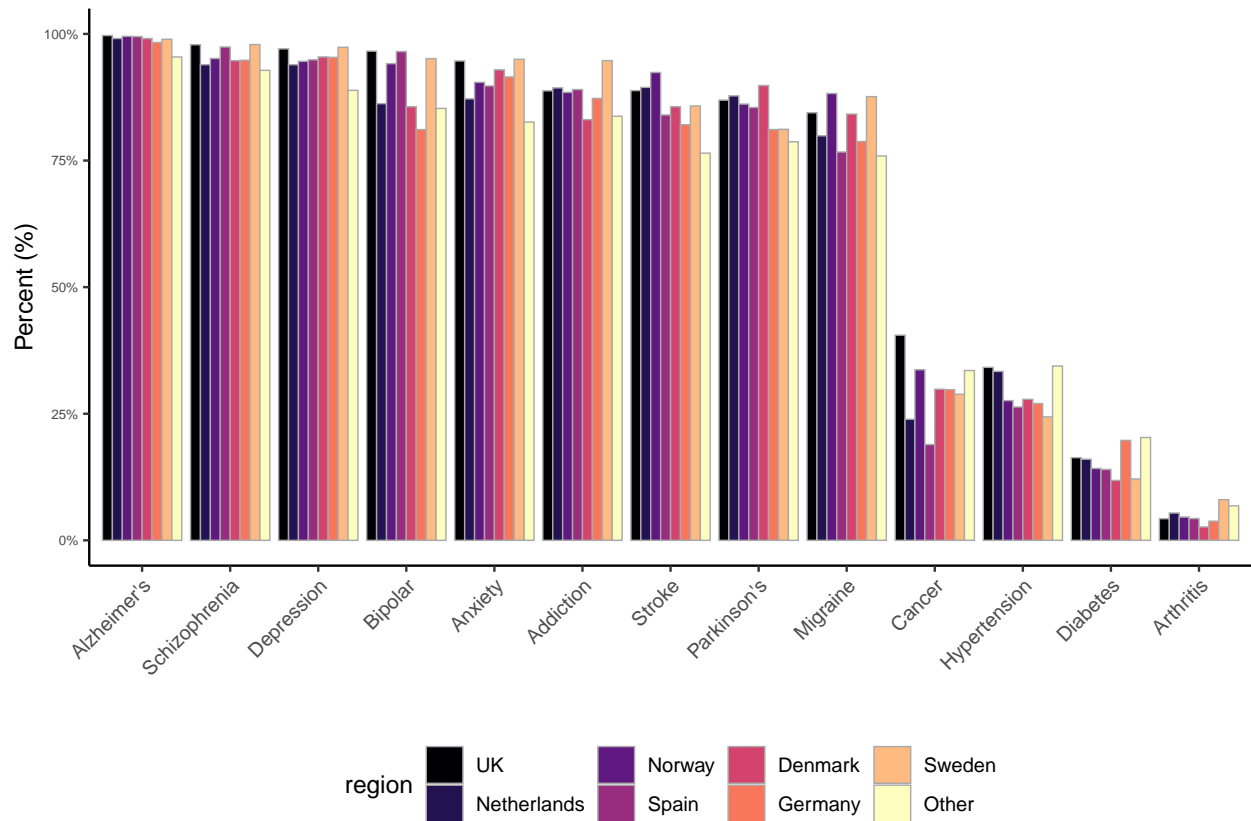

Respondents were given the option to tick boxes with the diseases presented above to indicate which ones they associated with the brain. They were allowed to select as many categories as they wished. The question was optional, and as such we present data from the 27 530 who responded to the question. We do not know if those who refrained from responding did so because they did not associate any of the diseases with the brain, or if they simply did not wish to respond.

Only

### 3.6 Health care experience/education

Diseases/disorders associated with the brain  
by reported education or work experience in health care...

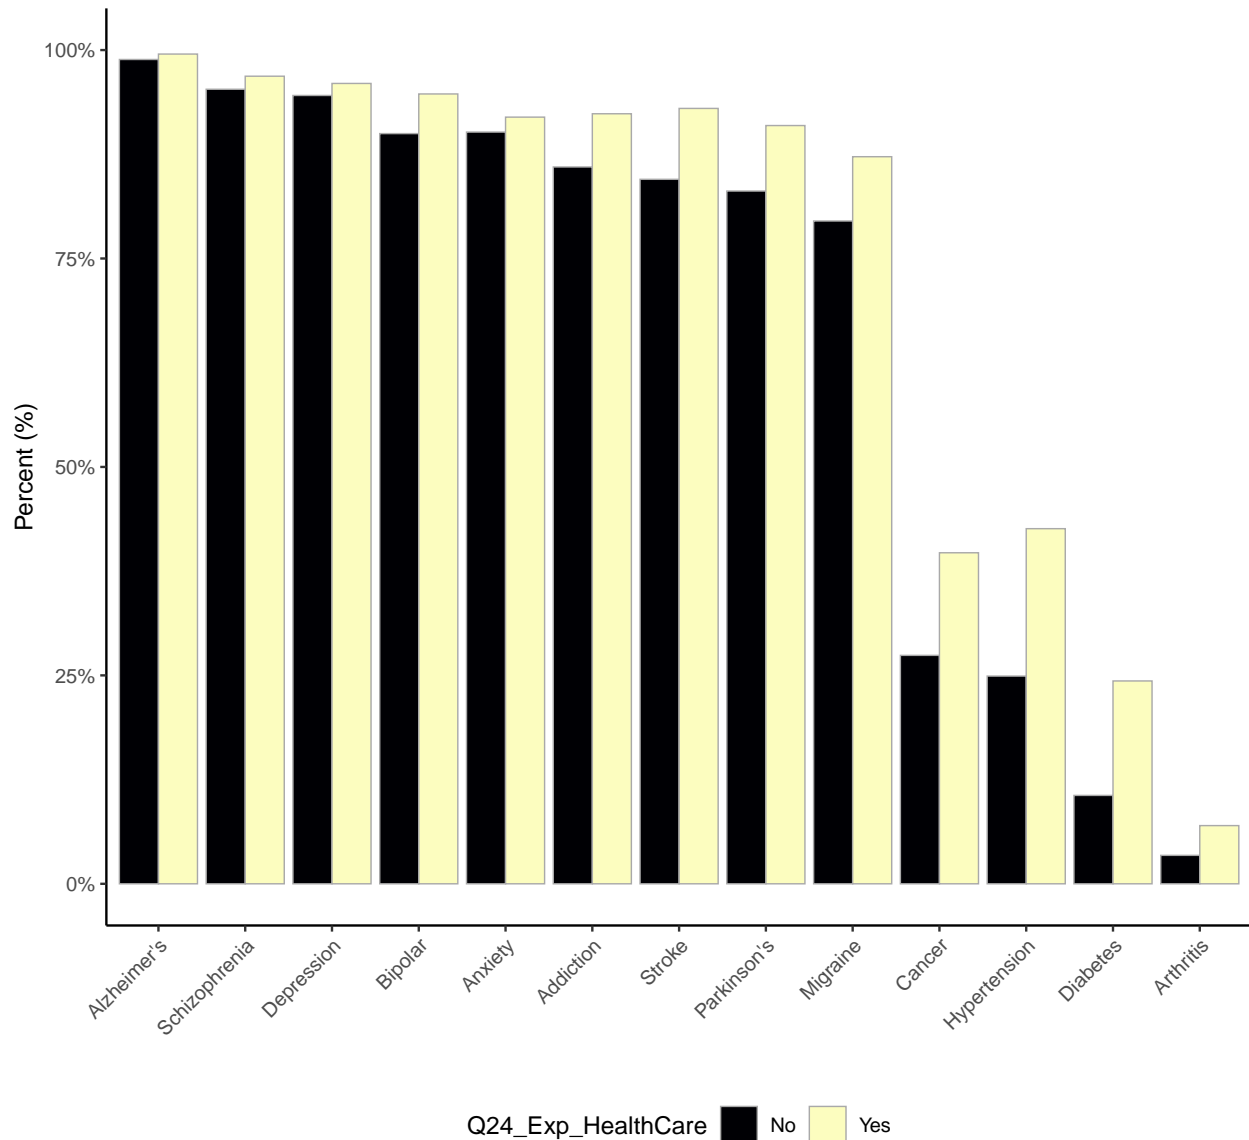

Respondents were given the option to tick boxes with the diseases presented above to indicate which ones they associated with the brain. They were allowed to select as many categories as they wished. The question was optional, and as such we present data from the 27 530 who responded to the question. We do not know if those who refrained from responding did so because they did not associate any of the diseases with the brain, or if they simply did not wish to respond.



### 3.7 Cognitive health

Diseases/disorders associated with the brain  
by self-rated cognitive health

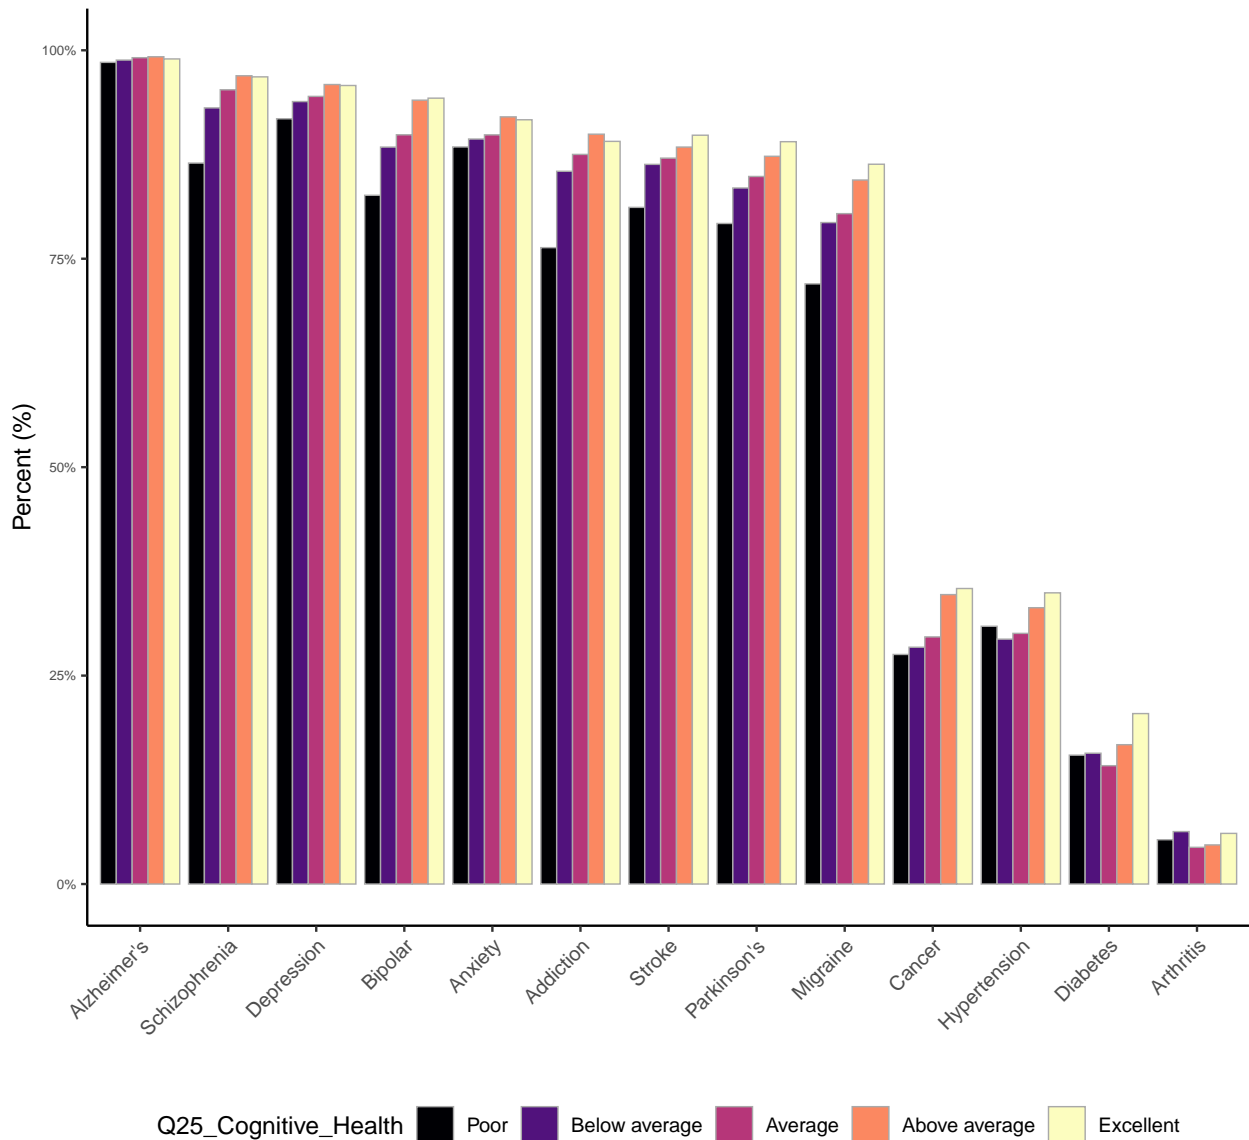

Respondents were given the option to tick boxes with the diseases presented above to indicate which ones they associated with the brain. They were allowed to select as many categories as they wished. The question was optional, and as such we present data from the 27 530 who responded to the question. We do not know if those who refrained from responding did so because they did not associate any of the diseases with the brain, or if they simply did not wish to respond.

### 3.8 Mental health

Diseases/disorders associated with the brain  
by self-rated mental health

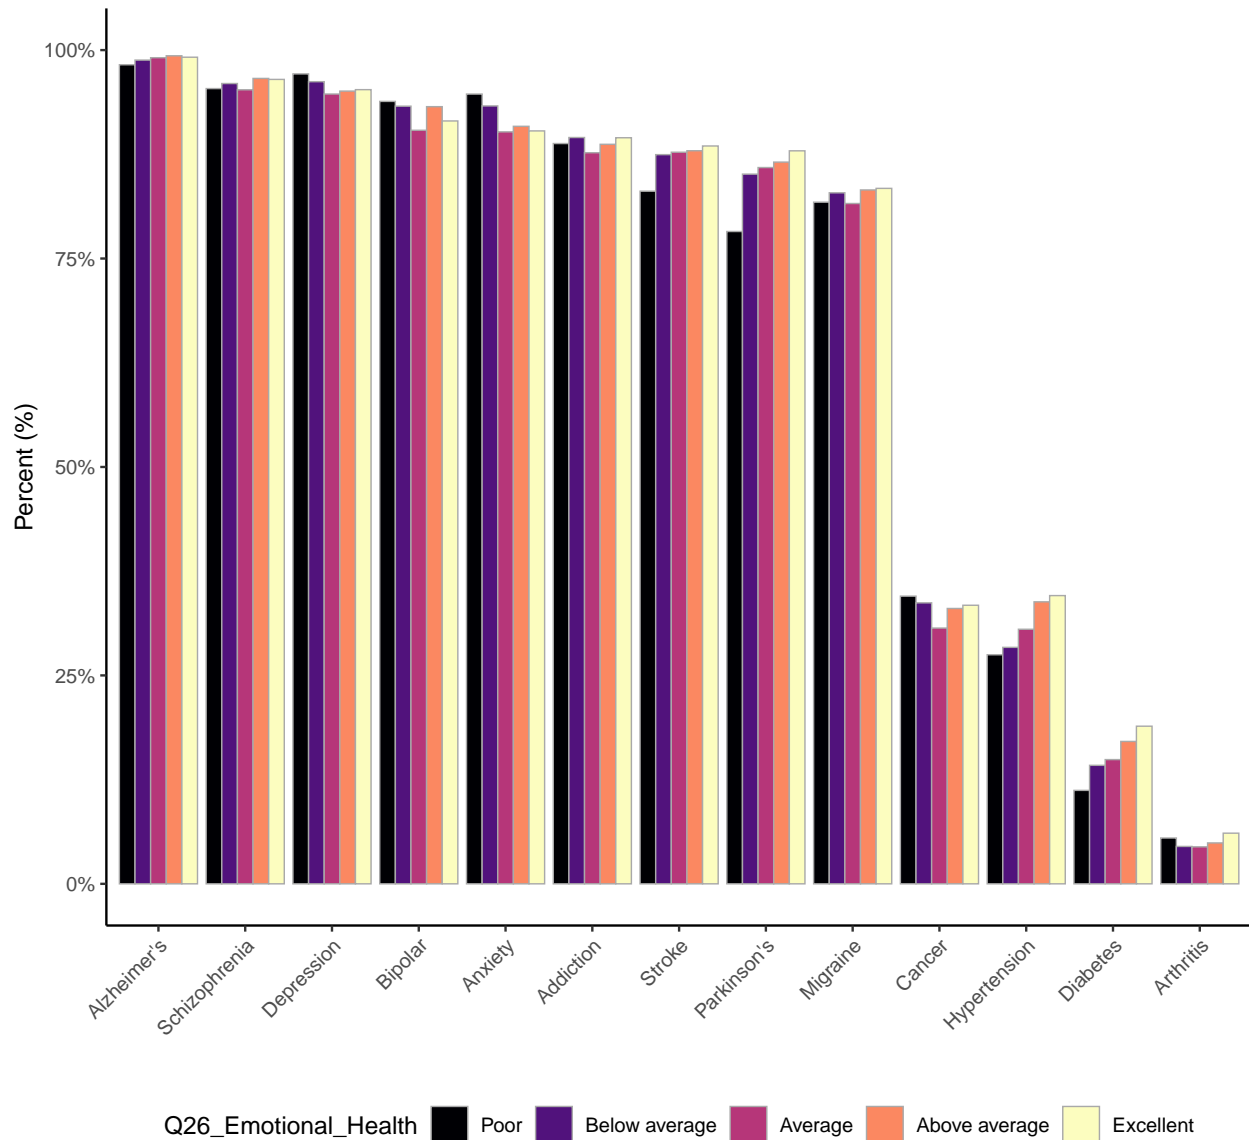

Respondents were given the option to tick boxes with the diseases presented above to indicate which ones they associated with the brain. They were allowed to select as many categories as they wished. The question was optional, and as such we present data from the 27 530 who responded to the question. We do not know if those who refrained from responding did so because they did not associate any of the diseases with the brain, or if they simply did not wish to respond.

### 3.9 Illness

#### Diseases/disorders associated with the brain

by experience of long-standing illness, disability or health problem

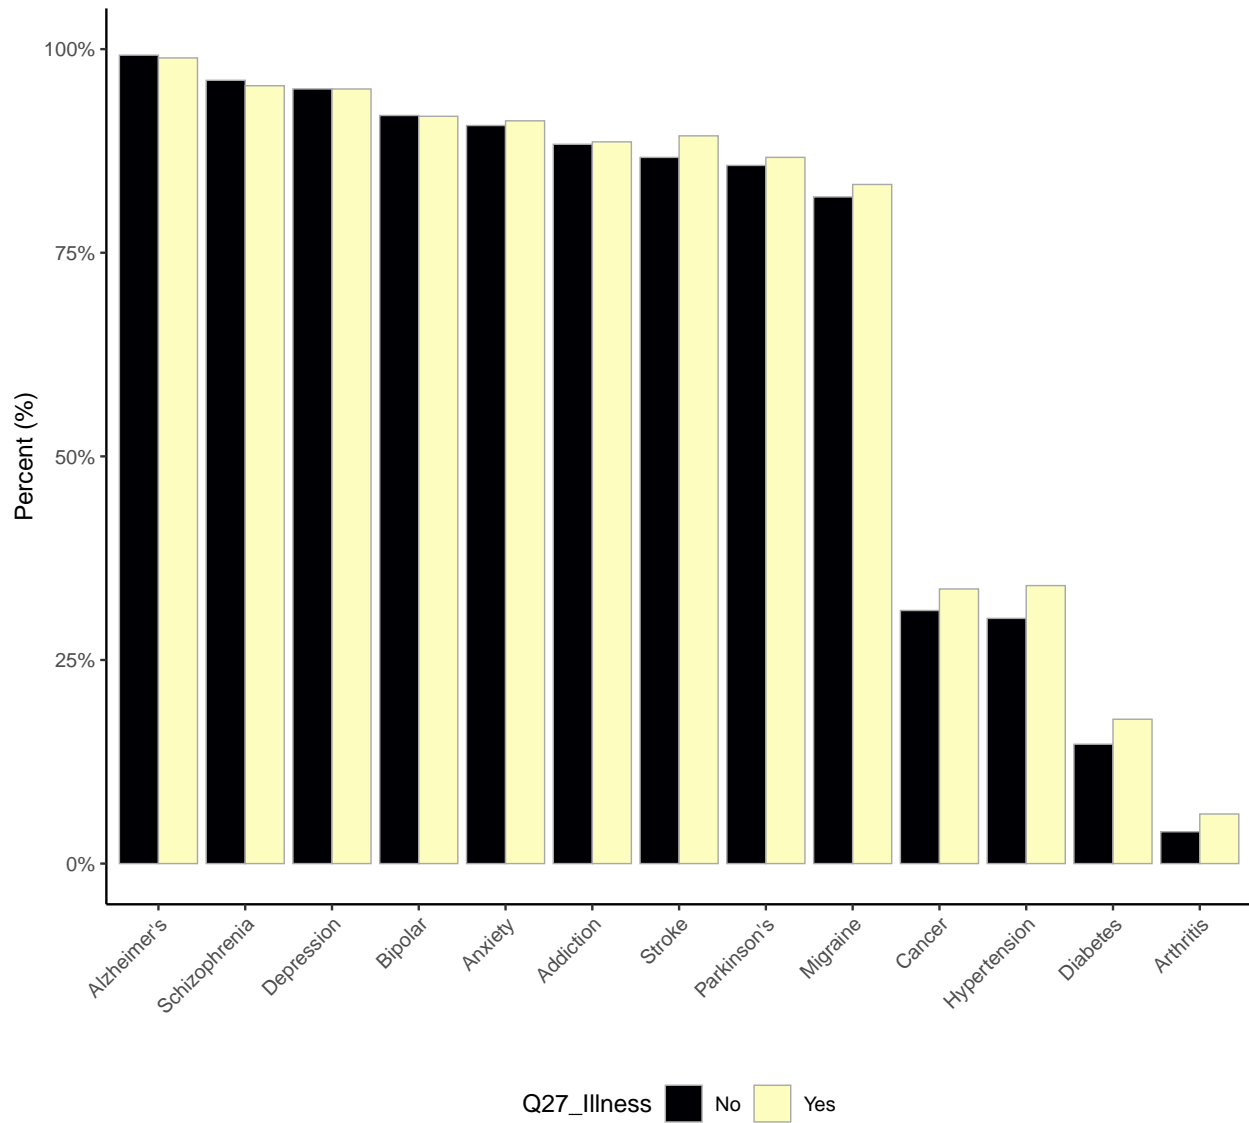

Respondents were given the option to tick boxes with the diseases presented above to indicate which ones they associated with the brain. They were allowed to select as many categories as they wished. The question was optional, and as such we present data from the 27 530 who responded to the question. We do not know if those who refrained from responding did so because they did not associate any of the diseases with the brain, or if they simply did not wish to respond. Here divided whether they had experience with long-standing illness, disability, or health problem.

### 3.10 Brain disease care

#### Ratings of factors influencing brain health

by experience of taking care of family member with brain disease

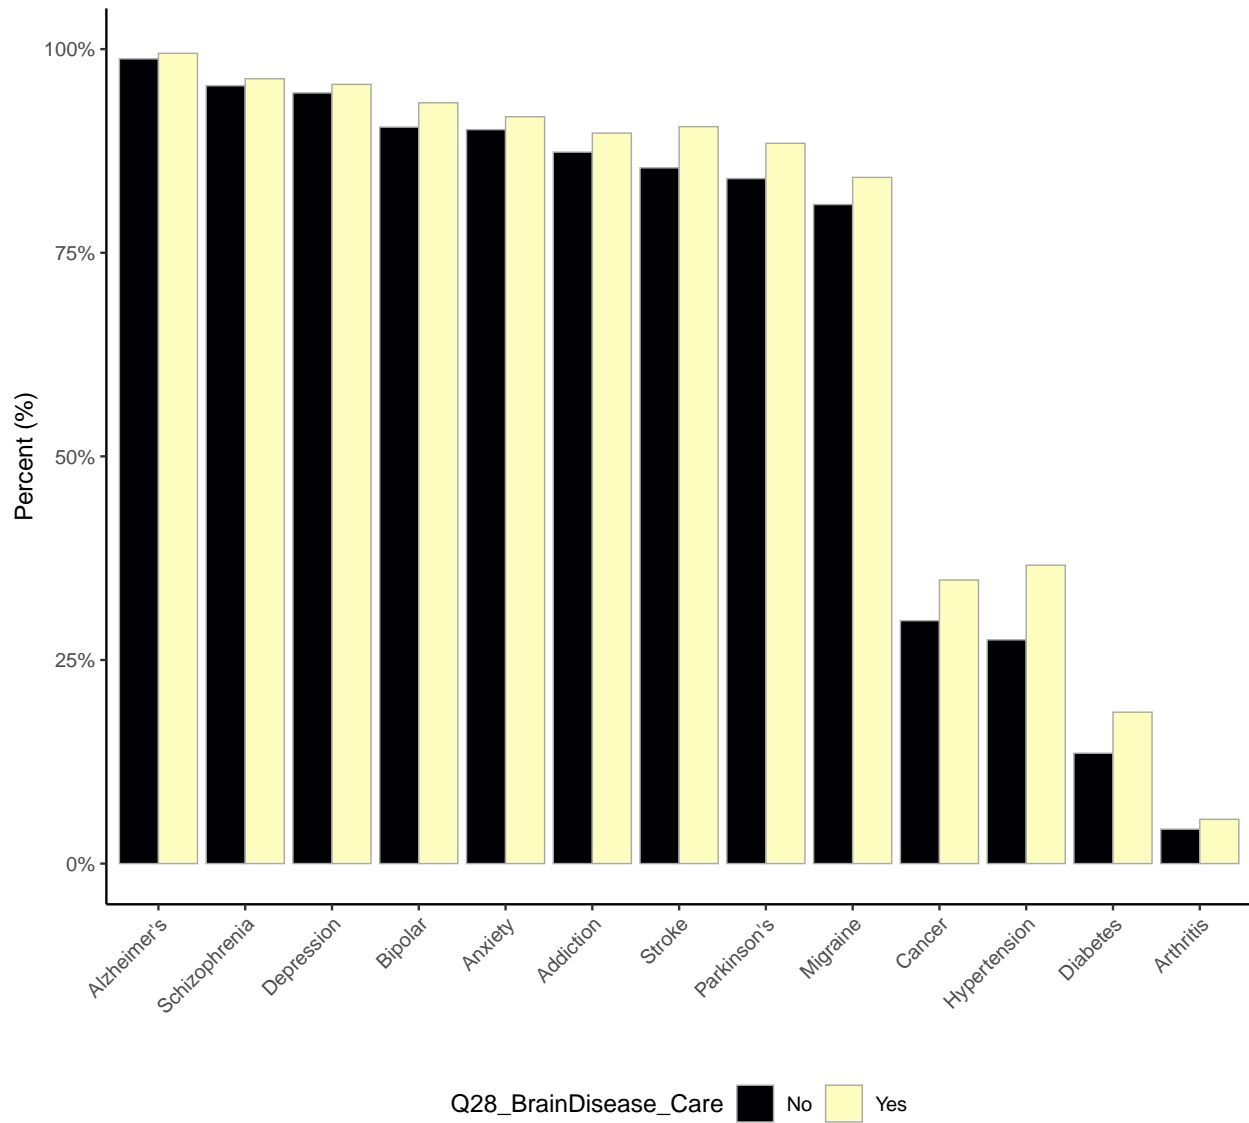

Respondents were given the option to tick boxes with the diseases presented above to indicate which ones they associated with the brain. They were allowed to select as many categories as they wished. The question was optional, and as such we present data from the 27 530 who responded to the question. We do not know if those who refrained from responding did so because they did not associate any of the diseases with the brain, or if they simply did not wish to respond. Here divided whether they had experience with looking after a member of family with brain disease.

### 3.11 Research participation

#### Ratings of factors influencing brain health

By experience of brain research participation

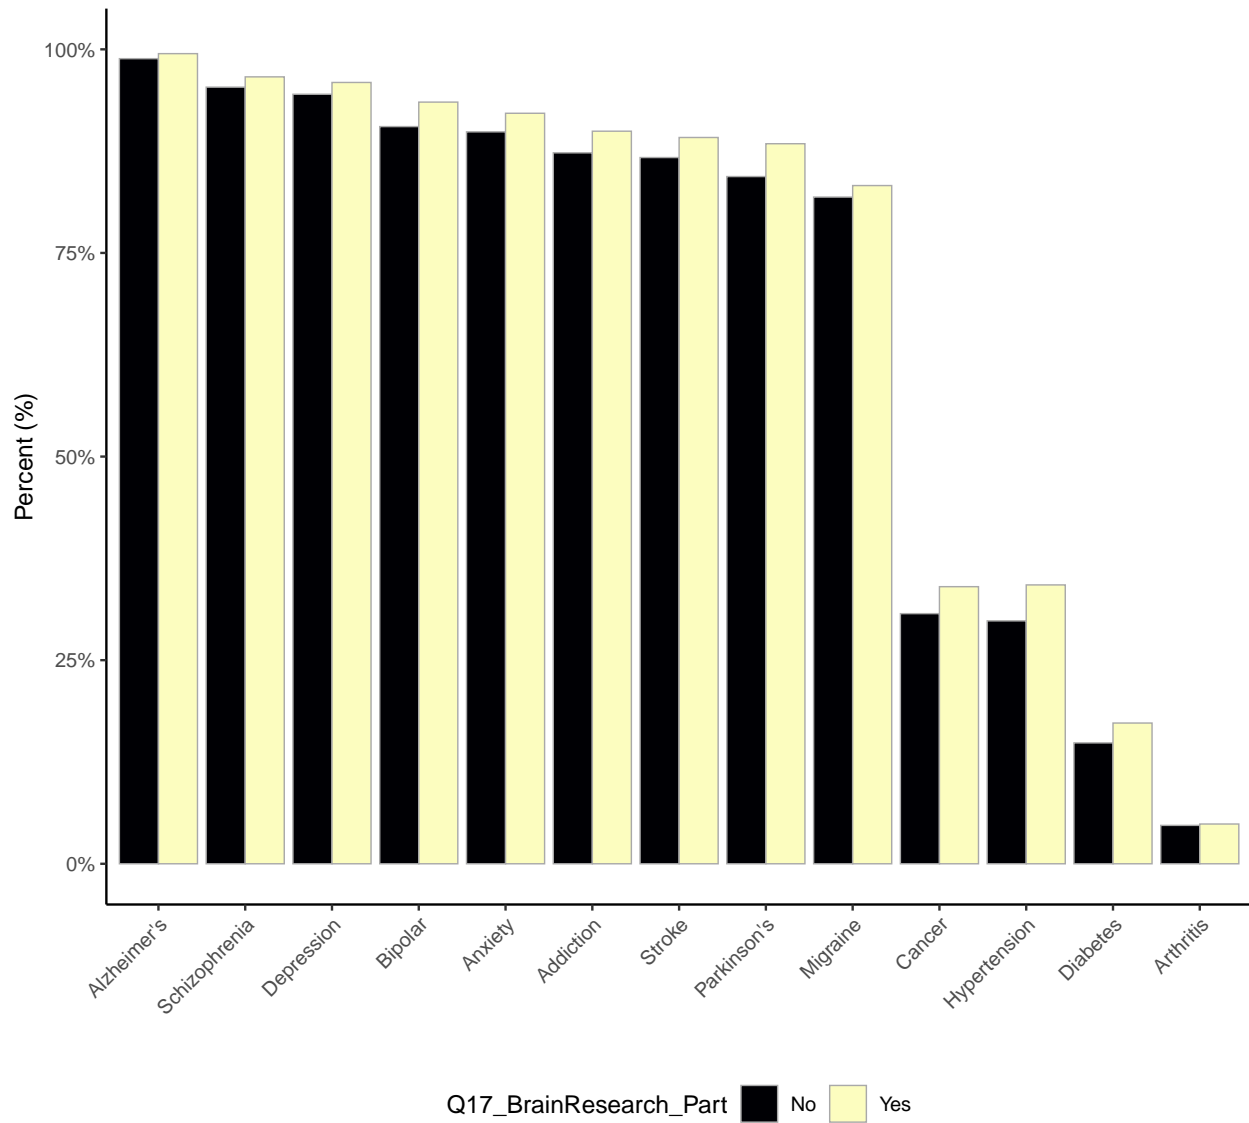

Respondents were given the option to tick boxes with the diseases presented above to indicate which ones they associated with the brain. They were allowed to select as many categories as they wished. The question was optional, and as such we present data from the 27 530 who responded to the question. We do not know if those who refrained from responding did so because they did not associate any of the diseases with the brain, or if they simply did not wish to respond. Here divided whether they have participated in brain research projects.

# Lifebrain Global Brain Health Survey

## Supplementary tables

### Contents

|          |                                                         |          |
|----------|---------------------------------------------------------|----------|
| <b>1</b> | <b>Question 1</b>                                       | <b>3</b> |
| 1.1      | continuous . . . . .                                    | 4        |
| 1.1.1    | Question 1: continuous - Income . . . . .               | 5        |
| 1.1.2    | Question 1: continuous - Profession . . . . .           | 6        |
| 1.1.3    | Question 1: continuous - Education . . . . .            | 7        |
| 1.1.4    | Question 1: continuous - Diet . . . . .                 | 8        |
| 1.1.5    | Question 1: continuous - Physical environment . . . . . | 9        |
| 1.1.6    | Question 1: continuous - Life goals . . . . .           | 10       |
| 1.1.7    | Question 1: continuous - Social environment . . . . .   | 11       |
| 1.1.8    | Question 1: continuous - Sleeping habits . . . . .      | 12       |
| 1.1.9    | Question 1: continuous - Physical health . . . . .      | 13       |
| 1.1.10   | Question 1: continuous - Genetics . . . . .             | 14       |
| 1.1.11   | Question 1: continuous - Substance use . . . . .        | 15       |
| 1.2      | binary . . . . .                                        | 16       |
| 1.2.1    | Question 1: binary - Income . . . . .                   | 17       |
| 1.2.2    | Question 1: binary - Profession . . . . .               | 18       |
| 1.2.3    | Question 1: binary - Education . . . . .                | 19       |
| 1.2.4    | Question 1: binary - Diet . . . . .                     | 20       |
| 1.2.5    | Question 1: binary - Physical environment . . . . .     | 21       |
| 1.2.6    | Question 1: binary - Life goals . . . . .               | 22       |
| 1.2.7    | Question 1: binary - Social environment . . . . .       | 23       |
| 1.2.8    | Question 1: binary - Sleeping habits . . . . .          | 24       |
| 1.2.9    | Question 1: binary - Physical health . . . . .          | 25       |
| 1.2.10   | Question 1: binary - Genetics . . . . .                 | 26       |
| 1.2.11   | Question 1: binary - Substance use . . . . .            | 27       |
| 1.3      | ordinal . . . . .                                       | 28       |
| 1.3.1    | Question 1: ordinal - Income . . . . .                  | 30       |
| 1.3.2    | Question 1: ordinal - Profession . . . . .              | 32       |
| 1.3.3    | Question 1: ordinal - Education . . . . .               | 34       |
| 1.3.4    | Question 1: ordinal - Diet . . . . .                    | 36       |
| 1.3.5    | Question 1: ordinal - Physical environment . . . . .    | 38       |
| 1.3.6    | Question 1: ordinal - Life goals . . . . .              | 40       |
| 1.3.7    | Question 1: ordinal - Social environment . . . . .      | 42       |
| 1.3.8    | Question 1: ordinal - Sleeping habits . . . . .         | 44       |
| 1.3.9    | Question 1: ordinal - Physical health . . . . .         | 46       |
| 1.3.10   | Question 1: ordinal - Genetics . . . . .                | 48       |
| 1.3.11   | Question 1: ordinal - Substance use . . . . .           | 50       |
| 1.4      | bin_vs_cont . . . . .                                   | 51       |
| 1.4.1    | Question 1: bin_vs_cont - Income . . . . .              | 52       |
| 1.4.2    | Question 1: bin_vs_cont - Profession . . . . .          | 53       |
| 1.4.3    | Question 1: bin_vs_cont - Education . . . . .           | 54       |
| 1.4.4    | Question 1: bin_vs_cont - Diet . . . . .                | 55       |

|    |          |                                                             |
|----|----------|-------------------------------------------------------------|
| 1  |          |                                                             |
| 2  |          |                                                             |
| 3  | 1.4.5    | Question 1: bin_vs_cont - Physical environment . . . . . 56 |
| 4  | 1.4.6    | Question 1: bin_vs_cont - Life goals . . . . . 57           |
| 5  | 1.4.7    | Question 1: bin_vs_cont - Social environment . . . . . 58   |
| 6  | 1.4.8    | Question 1: bin_vs_cont - Sleeping habits . . . . . 59      |
| 7  | 1.4.9    | Question 1: bin_vs_cont - Physical health . . . . . 60      |
| 8  | 1.4.10   | Question 1: bin_vs_cont - Genetics . . . . . 61             |
| 9  | 1.4.11   | Question 1: bin_vs_cont - Substance use . . . . . 62        |
| 10 |          |                                                             |
| 11 | <b>2</b> | <b>Question 2 . . . . . 64</b>                              |
| 12 | 2.1      | continuous . . . . . 64                                     |
| 13 | 2.1.1    | Question 2: continuous - In the womb . . . . . 65           |
| 14 | 2.1.2    | Question 2: continuous - Childhood . . . . . 66             |
| 15 | 2.1.3    | Question 2: continuous - Adolescence . . . . . 67           |
| 16 | 2.1.4    | Question 2: continuous - Young adulthood . . . . . 68       |
| 17 | 2.1.5    | Question 2: continuous - Middle age . . . . . 69            |
| 18 | 2.1.6    | Question 2: continuous - Old age . . . . . 70               |
| 19 | 2.2      | binary . . . . . 70                                         |
| 20 | 2.2.1    | Question 2: binary - In the womb . . . . . 71               |
| 21 | 2.2.2    | Question 2: binary - Childhood . . . . . 72                 |
| 22 | 2.2.3    | Question 2: binary - Adolescence . . . . . 73               |
| 23 | 2.2.4    | Question 2: binary - Young adulthood . . . . . 74           |
| 24 | 2.2.5    | Question 2: binary - Middle age . . . . . 75                |
| 25 | 2.2.6    | Question 2: binary - Old age . . . . . 76                   |
| 26 | 2.3      | ordinal . . . . . 76                                        |
| 27 | 2.3.1    | Question 2: ordinal - In the womb . . . . . 78              |
| 28 | 2.3.2    | Question 2: ordinal - Childhood . . . . . 80                |
| 29 | 2.3.3    | Question 2: ordinal - Adolescence . . . . . 82              |
| 30 | 2.3.4    | Question 2: ordinal - Young adulthood . . . . . 84          |
| 31 | 2.3.5    | Question 2: ordinal - Middle age . . . . . 86               |
| 32 | 2.3.6    | Question 2: ordinal - Old age . . . . . 88                  |
| 33 | 2.4      | bin_vs_cont . . . . . 89                                    |
| 34 | 2.4.1    | Question 2: bin_vs_cont - In the womb . . . . . 90          |
| 35 | 2.4.2    | Question 2: bin_vs_cont - Childhood . . . . . 91            |
| 36 | 2.4.3    | Question 2: bin_vs_cont - Adolescence . . . . . 92          |
| 37 | 2.4.4    | Question 2: bin_vs_cont - Young adulthood . . . . . 93      |
| 38 | 2.4.5    | Question 2: bin_vs_cont - Middle age . . . . . 94           |
| 39 | 2.4.6    | Question 2: bin_vs_cont - Old age . . . . . 95              |
| 40 |          |                                                             |
| 41 | <b>3</b> | <b>Question 3 . . . . . 97</b>                              |
| 42 | 3.1      | binary . . . . . 97                                         |
| 43 | 3.1.1    | Question 3: binary - Alzheimer's . . . . . 98               |
| 44 | 3.1.2    | Question 3: binary - Schizophrenia . . . . . 99             |
| 45 | 3.1.3    | Question 3: binary - Depression . . . . . 100               |
| 46 | 3.1.4    | Question 3: binary - Bipolar . . . . . 101                  |
| 47 | 3.1.5    | Question 3: binary - Anxiety . . . . . 102                  |
| 48 | 3.1.6    | Question 3: binary - Addiction . . . . . 103                |
| 49 | 3.1.7    | Question 3: binary - Stroke . . . . . 104                   |
| 50 | 3.1.8    | Question 3: binary - Parkinson's . . . . . 105              |
| 51 | 3.1.9    | Question 3: binary - Migraine . . . . . 106                 |
| 52 | 3.1.10   | Question 3: binary - Cancer . . . . . 107                   |
| 53 | 3.1.11   | Question 3: binary - Hypertension . . . . . 108             |
| 54 | 3.1.12   | Question 3: binary - Diabetes . . . . . 109                 |
| 55 | 3.1.13   | Question 3: binary - Arthritis . . . . . 110                |
| 56 |          |                                                             |
| 57 |          |                                                             |
| 58 |          |                                                             |
| 59 |          |                                                             |
| 60 |          |                                                             |

1  
2  
3  
4  
5  
6  
7  
8  
9  
10  
11  
12  
13  
14  
15  
16  
17  
18  
19  
20  
21  
22  
23  
24  
25  
26  
27  
28  
29  
30  
31  
32  
33  
34  
35  
36  
37  
38  
39  
40  
41  
42  
43  
44  
45  
46  
47  
48  
49  
50  
51  
52  
53  
54  
55  
56  
57  
58  
59  
60

**1 Question 1**

For peer review only



1  
2  
3 **1.1 continuous**  
4  
5  
6  
7  
8  
9  
10  
11  
12  
13  
14  
15  
16  
17  
18  
19  
20  
21  
22  
23  
24  
25  
26  
27  
28  
29  
30  
31  
32  
33  
34  
35  
36  
37  
38  
39  
40  
41  
42  
43  
44  
45  
46  
47  
48  
49  
50  
51  
52  
53  
54  
55  
56  
57  
58  
59  
60

For peer review only

## 1.1.1 Question 1: continuous - Income

| fct                          | term              | estimate | std.error | statistic | p.value |
|------------------------------|-------------------|----------|-----------|-----------|---------|
|                              | (Intercept)       | 2.79     | 0.01      | 346.28    | 0.00    |
| age                          | 41-60             | 0.02     | 0.01      | 1.34      | 0.18    |
|                              | <= 40             | 0.13     | 0.02      | 8.24      | 0.00    |
| education                    | (Intercept)       | 2.83     | 0.01      | 427.49    | 0.00    |
|                              | Lower             | -0.03    | 0.01      | -2.85     | 0.00    |
| gender                       | (Intercept)       | 2.80     | 0.01      | 431.20    | 0.00    |
|                              | Man               | 0.06     | 0.01      | 5.03      | 0.00    |
|                              | Other/Undisclosed | -0.10    | 0.08      | -1.21     | 0.23    |
| healthcare_experience        | (Intercept)       | 2.87     | 0.01      | 411.84    | 0.00    |
|                              | Yes               | -0.14    | 0.01      | -12.62    | 0.00    |
| cognitive_health             | (Intercept)       | 2.81     | 0.01      | 497.69    | 0.00    |
|                              | Below average     | 0.06     | 0.02      | 2.64      | 0.01    |
| mental_health                | (Intercept)       | 2.81     | 0.01      | 478.30    | 0.00    |
|                              | Below average     | 0.03     | 0.02      | 1.74      | 0.08    |
| illness_experience           | (Intercept)       | 2.84     | 0.01      | 400.38    | 0.00    |
|                              | Yes               | -0.06    | 0.01      | -4.95     | 0.00    |
| brain_disease_caregiver      | (Intercept)       | 2.82     | 0.01      | 376.99    | 0.00    |
|                              | Yes               | -0.02    | 0.01      | -1.46     | 0.14    |
| brain_research_participation | (Intercept)       | 2.83     | 0.01      | 388.69    | 0.00    |
|                              | Yes               | -0.02    | 0.01      | -2.12     | 0.03    |
| relationship                 | (Intercept)       | 2.82     | 0.01      | 341.26    | 0.00    |
|                              | Stable            | 0.00     | 0.01      | -0.09     | 0.93    |

## 1.1.2 Question 1: continuous - Profession

| fct                          | term              | estimate | std.error | statistic | p.value |
|------------------------------|-------------------|----------|-----------|-----------|---------|
|                              | (Intercept)       | 2.49     | 0.01      | 320.24    | 0.00    |
| age                          | 41-60             | -0.09    | 0.01      | -7.52     | 0.00    |
|                              | <= 40             | -0.19    | 0.02      | -12.39    | 0.00    |
| education                    | (Intercept)       | 2.38     | 0.01      | 373.25    | 0.00    |
|                              | Lower             | 0.15     | 0.01      | 13.31     | 0.00    |
| gender                       | (Intercept)       | 2.44     | 0.01      | 388.72    | 0.00    |
|                              | Man               | -0.05    | 0.01      | -4.27     | 0.00    |
|                              | Other/Undisclosed | 0.01     | 0.08      | 0.12      | 0.90    |
| healthcare_experience        | (Intercept)       | 2.47     | 0.01      | 365.74    | 0.00    |
|                              | Yes               | -0.11    | 0.01      | -10.03    | 0.00    |
| cognitive_health             | (Intercept)       | 2.42     | 0.01      | 442.80    | 0.00    |
|                              | Below average     | 0.14     | 0.02      | 6.08      | 0.00    |
| mental_health                | (Intercept)       | 2.42     | 0.01      | 425.73    | 0.00    |
|                              | Below average     | 0.05     | 0.02      | 3.07      | 0.00    |
| illness_experience           | (Intercept)       | 2.41     | 0.01      | 352.17    | 0.00    |
|                              | Yes               | 0.03     | 0.01      | 2.52      | 0.01    |
| brain_disease_caregiver      | (Intercept)       | 2.39     | 0.01      | 330.81    | 0.00    |
|                              | Yes               | 0.07     | 0.01      | 6.30      | 0.00    |
| brain_research_participation | (Intercept)       | 2.40     | 0.01      | 341.07    | 0.00    |
|                              | Yes               | 0.07     | 0.01      | 6.48      | 0.00    |
| relationship                 | (Intercept)       | 2.41     | 0.01      | 302.34    | 0.00    |
|                              | Stable            | 0.03     | 0.01      | 2.38      | 0.02    |

## 1.1.3 Question 1: continuous - Education

| fct                          | term              | estimate | std.error | statistic | p.value |
|------------------------------|-------------------|----------|-----------|-----------|---------|
|                              | (Intercept)       | 2.33     | 0.01      | 294.00    | 0.00    |
| age                          | 41-60             | 0.02     | 0.01      | 1.55      | 0.12    |
|                              | <= 40             | -0.11    | 0.02      | -6.88     | 0.00    |
| education                    | (Intercept)       | 2.24     | 0.01      | 347.77    | 0.00    |
|                              | Lower             | 0.23     | 0.01      | 20.40     | 0.00    |
| gender                       | (Intercept)       | 2.32     | 0.01      | 364.35    | 0.00    |
|                              | Man               | -0.03    | 0.01      | -2.60     | 0.01    |
|                              | Other/Undisclosed | -0.03    | 0.08      | -0.32     | 0.75    |
| healthcare_experience        | (Intercept)       | 2.37     | 0.01      | 346.73    | 0.00    |
|                              | Yes               | -0.15    | 0.01      | -13.63    | 0.00    |
| cognitive_health             | (Intercept)       | 2.30     | 0.01      | 415.46    | 0.00    |
|                              | Below average     | 0.22     | 0.02      | 9.50      | 0.00    |
| mental_health                | (Intercept)       | 2.30     | 0.01      | 398.10    | 0.00    |
|                              | Below average     | 0.15     | 0.02      | 9.54      | 0.00    |
| illness_experience           | (Intercept)       | 2.29     | 0.01      | 329.40    | 0.00    |
|                              | Yes               | 0.05     | 0.01      | 4.79      | 0.00    |
| brain_disease_caregiver      | (Intercept)       | 2.30     | 0.01      | 312.05    | 0.00    |
|                              | Yes               | 0.04     | 0.01      | 3.97      | 0.00    |
| brain_research_participation | (Intercept)       | 2.31     | 0.01      | 323.58    | 0.00    |
|                              | Yes               | 0.01     | 0.01      | 1.08      | 0.28    |
| relationship                 | (Intercept)       | 2.31     | 0.01      | 285.57    | 0.00    |
|                              | Stable            | 0.00     | 0.01      | 0.14      | 0.89    |

## 1.1.4 Question 1: continuous - Diet

| fct                          | term              | estimate | std.error | statistic | p.value |
|------------------------------|-------------------|----------|-----------|-----------|---------|
|                              | (Intercept)       | 2.21     | 0.01      | 303.94    | 0.00    |
| age                          | 41-60             | -0.19    | 0.01      | -17.83    | 0.00    |
|                              | <= 40             | -0.24    | 0.01      | -16.58    | 0.00    |
| education                    | (Intercept)       | 2.07     | 0.01      | 344.18    | 0.00    |
|                              | Lower             | 0.12     | 0.01      | 11.01     | 0.00    |
| gender                       | (Intercept)       | 2.06     | 0.01      | 350.17    | 0.00    |
|                              | Man               | 0.14     | 0.01      | 12.65     | 0.00    |
|                              | Other/Undisclosed | -0.05    | 0.07      | -0.65     | 0.51    |
| healthcare_experience        | (Intercept)       | 2.16     | 0.01      | 340.55    | 0.00    |
|                              | Yes               | -0.14    | 0.01      | -14.09    | 0.00    |
| cognitive_health             | (Intercept)       | 2.09     | 0.01      | 407.41    | 0.00    |
|                              | Below average     | 0.18     | 0.02      | 8.69      | 0.00    |
| mental_health                | (Intercept)       | 2.09     | 0.01      | 391.07    | 0.00    |
|                              | Below average     | 0.09     | 0.01      | 5.98      | 0.00    |
| illness_experience           | (Intercept)       | 2.08     | 0.01      | 323.06    | 0.00    |
|                              | Yes               | 0.05     | 0.01      | 4.56      | 0.00    |
| brain_disease_caregiver      | (Intercept)       | 2.14     | 0.01      | 313.75    | 0.00    |
|                              | Yes               | -0.07    | 0.01      | -7.35     | 0.00    |
| brain_research_participation | (Intercept)       | 2.11     | 0.01      | 319.29    | 0.00    |
|                              | Yes               | -0.02    | 0.01      | -2.02     | 0.04    |
| relationship                 | (Intercept)       | 2.09     | 0.01      | 278.30    | 0.00    |
|                              | Stable            | 0.03     | 0.01      | 2.66      | 0.01    |

## 1.1.5 Question 1: continuous - Physical environment

| fct                          | term              | estimate | std.error | statistic | p.value |
|------------------------------|-------------------|----------|-----------|-----------|---------|
|                              | (Intercept)       | 2.12     | 0.01      | 290.32    | 0.00    |
| age                          | 41-60             | -0.09    | 0.01      | -8.67     | 0.00    |
|                              | <= 40             | -0.06    | 0.01      | -4.14     | 0.00    |
| education                    | (Intercept)       | 2.08     | 0.01      | 347.07    | 0.00    |
|                              | Lower             | -0.02    | 0.01      | -1.57     | 0.12    |
| gender                       | (Intercept)       | 2.05     | 0.01      | 349.10    | 0.00    |
|                              | Man               | 0.08     | 0.01      | 6.99      | 0.00    |
|                              | Other/Undisclosed | -0.10    | 0.07      | -1.43     | 0.15    |
| healthcare_experience        | (Intercept)       | 2.10     | 0.01      | 332.92    | 0.00    |
|                              | Yes               | -0.08    | 0.01      | -8.19     | 0.00    |
| cognitive_health             | (Intercept)       | 2.06     | 0.01      | 404.03    | 0.00    |
|                              | Below average     | 0.10     | 0.02      | 4.90      | 0.00    |
| mental_health                | (Intercept)       | 2.07     | 0.01      | 388.51    | 0.00    |
|                              | Below average     | 0.03     | 0.01      | 2.28      | 0.02    |
| illness_experience           | (Intercept)       | 2.09     | 0.01      | 326.35    | 0.00    |
|                              | Yes               | -0.05    | 0.01      | -5.38     | 0.00    |
| brain_disease_caregiver      | (Intercept)       | 2.08     | 0.01      | 306.66    | 0.00    |
|                              | Yes               | -0.02    | 0.01      | -1.72     | 0.09    |
| brain_research_participation | (Intercept)       | 2.07     | 0.01      | 315.31    | 0.00    |
|                              | Yes               | -0.01    | 0.01      | -0.81     | 0.42    |
| relationship                 | (Intercept)       | 2.05     | 0.01      | 274.73    | 0.00    |
|                              | Stable            | 0.04     | 0.01      | 3.64      | 0.00    |

## 1.1.6 Question 1: continuous - Life goals

| fct                          | term              | estimate | std.error | statistic | p.value |
|------------------------------|-------------------|----------|-----------|-----------|---------|
|                              | (Intercept)       | 2.06     | 0.01      | 270.35    | 0.00    |
| age                          | 41-60             | -0.01    | 0.01      | -0.49     | 0.62    |
|                              | <= 40             | 0.09     | 0.01      | 6.00      | 0.00    |
| education                    | (Intercept)       | 2.06     | 0.01      | 329.50    | 0.00    |
|                              | Lower             | 0.04     | 0.01      | 3.25      | 0.00    |
| gender                       | (Intercept)       | 2.05     | 0.01      | 334.18    | 0.00    |
|                              | Man               | 0.07     | 0.01      | 6.14      | 0.00    |
|                              | Other/Undisclosed | 0.01     | 0.08      | 0.17      | 0.87    |
| healthcare_experience        | (Intercept)       | 2.11     | 0.01      | 320.69    | 0.00    |
|                              | Yes               | -0.11    | 0.01      | -10.78    | 0.00    |
| cognitive_health             | (Intercept)       | 2.07     | 0.01      | 387.00    | 0.00    |
|                              | Below average     | 0.06     | 0.02      | 2.79      | 0.01    |
| mental_health                | (Intercept)       | 2.06     | 0.01      | 371.13    | 0.00    |
|                              | Below average     | 0.07     | 0.02      | 4.39      | 0.00    |
| illness_experience           | (Intercept)       | 2.07     | 0.01      | 309.33    | 0.00    |
|                              | Yes               | -0.01    | 0.01      | -0.93     | 0.35    |
| brain_disease_caregiver      | (Intercept)       | 2.06     | 0.01      | 291.32    | 0.00    |
|                              | Yes               | 0.02     | 0.01      | 1.62      | 0.10    |
| brain_research_participation | (Intercept)       | 2.04     | 0.01      | 297.42    | 0.00    |
|                              | Yes               | 0.06     | 0.01      | 6.14      | 0.00    |
| relationship                 | (Intercept)       | 2.06     | 0.01      | 264.76    | 0.00    |
|                              | Stable            | 0.01     | 0.01      | 0.93      | 0.35    |

## 1.1.7 Question 1: continuous - Social environment

| fct                          | term              | estimate | std.error | statistic | p.value |
|------------------------------|-------------------|----------|-----------|-----------|---------|
|                              | (Intercept)       | 1.94     | 0.01      | 288.53    | 0.00    |
| age                          | 41-60             | -0.13    | 0.01      | -12.66    | 0.00    |
|                              | <= 40             | -0.26    | 0.01      | -20.07    | 0.00    |
| education                    | (Intercept)       | 1.83     | 0.01      | 329.44    | 0.00    |
|                              | Lower             | 0.06     | 0.01      | 6.20      | 0.00    |
| gender                       | (Intercept)       | 1.82     | 0.01      | 333.85    | 0.00    |
|                              | Man               | 0.11     | 0.01      | 10.85     | 0.00    |
|                              | Other/Undisclosed | -0.17    | 0.07      | -2.52     | 0.01    |
| healthcare_experience        | (Intercept)       | 1.90     | 0.01      | 324.88    | 0.00    |
|                              | Yes               | -0.14    | 0.01      | -14.45    | 0.00    |
| cognitive_health             | (Intercept)       | 1.84     | 0.00      | 387.94    | 0.00    |
|                              | Below average     | 0.13     | 0.02      | 6.66      | 0.00    |
| mental_health                | (Intercept)       | 1.86     | 0.00      | 375.25    | 0.00    |
|                              | Below average     | -0.04    | 0.01      | -2.84     | 0.00    |
| illness_experience           | (Intercept)       | 1.84     | 0.01      | 308.98    | 0.00    |
|                              | Yes               | 0.02     | 0.01      | 1.82      | 0.07    |
| brain_disease_caregiver      | (Intercept)       | 1.86     | 0.01      | 294.47    | 0.00    |
|                              | Yes               | -0.01    | 0.01      | -1.16     | 0.25    |
| brain_research_participation | (Intercept)       | 1.83     | 0.01      | 299.84    | 0.00    |
|                              | Yes               | 0.04     | 0.01      | 4.30      | 0.00    |
| relationship                 | (Intercept)       | 1.83     | 0.01      | 263.05    | 0.00    |
|                              | Stable            | 0.05     | 0.01      | 4.97      | 0.00    |



## 1.1.8 Question 1: continuous - Sleeping habits

| fct                          | term              | estimate | std.error | statistic | p.value |
|------------------------------|-------------------|----------|-----------|-----------|---------|
|                              | (Intercept)       | 1.98     | 0.01      | 312.03    | 0.00    |
| age                          | 41-60             | -0.28    | 0.01      | -29.04    | 0.00    |
|                              | <= 40             | -0.41    | 0.01      | -32.90    | 0.00    |
| education                    | (Intercept)       | 1.79     | 0.01      | 335.47    | 0.00    |
|                              | Lower             | 0.07     | 0.01      | 7.00      | 0.00    |
| gender                       | (Intercept)       | 1.77     | 0.01      | 339.42    | 0.00    |
|                              | Man               | 0.13     | 0.01      | 13.02     | 0.00    |
|                              | Other/Undisclosed | -0.04    | 0.07      | -0.65     | 0.51    |
| healthcare_experience        | (Intercept)       | 1.85     | 0.01      | 328.79    | 0.00    |
|                              | Yes               | -0.11    | 0.01      | -11.72    | 0.00    |
| cognitive_health             | (Intercept)       | 1.81     | 0.00      | 397.08    | 0.00    |
|                              | Below average     | -0.02    | 0.02      | -1.28     | 0.20    |
| mental_health                | (Intercept)       | 1.83     | 0.00      | 385.18    | 0.00    |
|                              | Below average     | -0.12    | 0.01      | -9.03     | 0.00    |
| illness_experience           | (Intercept)       | 1.83     | 0.01      | 318.62    | 0.00    |
|                              | Yes               | -0.04    | 0.01      | -3.95     | 0.00    |
| brain_disease_caregiver      | (Intercept)       | 1.80     | 0.01      | 296.79    | 0.00    |
|                              | Yes               | 0.03     | 0.01      | 3.77      | 0.00    |
| brain_research_participation | (Intercept)       | 1.76     | 0.01      | 300.63    | 0.00    |
|                              | Yes               | 0.12     | 0.01      | 13.42     | 0.00    |
| relationship                 | (Intercept)       | 1.76     | 0.01      | 264.10    | 0.00    |
|                              | Stable            | 0.10     | 0.01      | 10.98     | 0.00    |

## 1.1.9 Question 1: continuous - Physical health

| fct                          | term              | estimate | std.error | statistic | p.value |
|------------------------------|-------------------|----------|-----------|-----------|---------|
|                              | (Intercept)       | 1.82     | 0.01      | 290.41    | 0.00    |
| age                          | 41-60             | -0.07    | 0.01      | -7.65     | 0.00    |
|                              | <= 40             | -0.09    | 0.01      | -7.70     | 0.00    |
| education                    | (Intercept)       | 1.74     | 0.01      | 339.35    | 0.00    |
|                              | Lower             | 0.12     | 0.01      | 12.71     | 0.00    |
| gender                       | (Intercept)       | 1.76     | 0.01      | 347.94    | 0.00    |
|                              | Man               | 0.07     | 0.01      | 7.47      | 0.00    |
|                              | Other/Undisclosed | 0.01     | 0.06      | 0.21      | 0.83    |
| healthcare_experience        | (Intercept)       | 1.83     | 0.01      | 336.63    | 0.00    |
|                              | Yes               | -0.12    | 0.01      | -14.06    | 0.00    |
| cognitive_health             | (Intercept)       | 1.77     | 0.00      | 402.56    | 0.00    |
|                              | Below average     | 0.16     | 0.02      | 8.83      | 0.00    |
| mental_health                | (Intercept)       | 1.77     | 0.00      | 386.63    | 0.00    |
|                              | Below average     | 0.07     | 0.01      | 5.46      | 0.00    |
| illness_experience           | (Intercept)       | 1.76     | 0.01      | 318.36    | 0.00    |
|                              | Yes               | 0.05     | 0.01      | 6.01      | 0.00    |
| brain_disease_caregiver      | (Intercept)       | 1.80     | 0.01      | 308.40    | 0.00    |
|                              | Yes               | -0.04    | 0.01      | -4.98     | 0.00    |
| brain_research_participation | (Intercept)       | 1.79     | 0.01      | 315.78    | 0.00    |
|                              | Yes               | -0.02    | 0.01      | -2.45     | 0.01    |
| relationship                 | (Intercept)       | 1.78     | 0.01      | 277.38    | 0.00    |
|                              | Stable            | -0.01    | 0.01      | -0.66     | 0.51    |

## 1.1.10 Question 1: continuous - Genetics

| fct                          | term              | estimate | std.error | statistic | p.value |
|------------------------------|-------------------|----------|-----------|-----------|---------|
|                              | (Intercept)       | 1.82     | 0.01      | 261.11    | 0.00    |
| age                          | 41-60             | -0.03    | 0.01      | -2.59     | 0.01    |
|                              | <= 40             | 0.12     | 0.01      | 8.53      | 0.00    |
| education                    | (Intercept)       | 1.82     | 0.01      | 317.89    | 0.00    |
|                              | Lower             | 0.03     | 0.01      | 2.59      | 0.01    |
| gender                       | (Intercept)       | 1.80     | 0.01      | 320.51    | 0.00    |
|                              | Man               | 0.10     | 0.01      | 9.30      | 0.00    |
|                              | Other/Undisclosed | 0.32     | 0.07      | 4.60      | 0.00    |
| healthcare_experience        | (Intercept)       | 1.84     | 0.01      | 304.54    | 0.00    |
|                              | Yes               | -0.04    | 0.01      | -3.85     | 0.00    |
| cognitive_health             | (Intercept)       | 1.82     | 0.00      | 373.01    | 0.00    |
|                              | Below average     | 0.05     | 0.02      | 2.72      | 0.01    |
| mental_health                | (Intercept)       | 1.83     | 0.01      | 359.52    | 0.00    |
|                              | Below average     | -0.02    | 0.01      | -1.09     | 0.27    |
| illness_experience           | (Intercept)       | 1.83     | 0.01      | 298.97    | 0.00    |
|                              | Yes               | -0.02    | 0.01      | -2.07     | 0.04    |
| brain_disease_caregiver      | (Intercept)       | 1.89     | 0.01      | 293.37    | 0.00    |
|                              | Yes               | -0.14    | 0.01      | -15.23    | 0.00    |
| brain_research_participation | (Intercept)       | 1.86     | 0.01      | 296.18    | 0.00    |
|                              | Yes               | -0.08    | 0.01      | -8.22     | 0.00    |
| relationship                 | (Intercept)       | 1.86     | 0.01      | 260.76    | 0.00    |
|                              | Stable            | -0.06    | 0.01      | -6.27     | 0.00    |

## 1.1.11 Question 1: continuous - Substance use

| fct                          | term              | estimate | std.error | statistic | p.value |
|------------------------------|-------------------|----------|-----------|-----------|---------|
|                              | (Intercept)       | 1.57     | 0.01      | 243.70    | 0.00    |
| age                          | 41-60             | -0.14    | 0.01      | -14.92    | 0.00    |
|                              | <= 40             | -0.12    | 0.01      | -9.92     | 0.00    |
| education                    | (Intercept)       | 1.48     | 0.01      | 278.40    | 0.00    |
|                              | Lower             | 0.06     | 0.01      | 6.44      | 0.00    |
| gender                       | (Intercept)       | 1.46     | 0.01      | 281.44    | 0.00    |
|                              | Man               | 0.11     | 0.01      | 11.15     | 0.00    |
|                              | Other/Undisclosed | 0.18     | 0.06      | 2.83      | 0.00    |
| healthcare_experience        | (Intercept)       | 1.53     | 0.01      | 273.80    | 0.00    |
|                              | Yes               | -0.10    | 0.01      | -10.71    | 0.00    |
| cognitive_health             | (Intercept)       | 1.48     | 0.00      | 327.91    | 0.00    |
|                              | Below average     | 0.18     | 0.02      | 9.81      | 0.00    |
| mental_health                | (Intercept)       | 1.49     | 0.00      | 316.17    | 0.00    |
|                              | Below average     | 0.03     | 0.01      | 2.19      | 0.03    |
| illness_experience           | (Intercept)       | 1.47     | 0.01      | 259.31    | 0.00    |
|                              | Yes               | 0.05     | 0.01      | 5.55      | 0.00    |
| brain_disease_caregiver      | (Intercept)       | 1.50     | 0.01      | 249.82    | 0.00    |
|                              | Yes               | -0.01    | 0.01      | -1.46     | 0.14    |
| brain_research_participation | (Intercept)       | 1.49     | 0.01      | 255.10    | 0.00    |
|                              | Yes               | 0.02     | 0.01      | 2.00      | 0.05    |
| relationship                 | (Intercept)       | 1.50     | 0.01      | 226.32    | 0.00    |
|                              | Stable            | -0.01    | 0.01      | -0.65     | 0.52    |

## 1.2 binary

For peer review only

## 1.2.1 Question 1: binary - Income

| fct                          | term              | estimate | std.error | statistic | p.value |
|------------------------------|-------------------|----------|-----------|-----------|---------|
|                              | (Intercept)       | -0.54    | 0.02      | -29.28    | 0.00    |
| age                          | 41-60             | -0.02    | 0.03      | -0.87     | 0.38    |
|                              | <= 40             | -0.21    | 0.04      | -5.81     | 0.00    |
| education                    | (Intercept)       | -0.62    | 0.02      | -40.31    | 0.00    |
|                              | Lower             | 0.10     | 0.03      | 3.86      | 0.00    |
| gender                       | (Intercept)       | -0.57    | 0.01      | -38.16    | 0.00    |
|                              | Man               | -0.05    | 0.03      | -1.88     | 0.06    |
|                              | Other/Undisclosed | 0.17     | 0.18      | 0.93      | 0.35    |
| healthcare_experience        | (Intercept)       | -0.69    | 0.02      | -42.09    | 0.00    |
|                              | Yes               | 0.27     | 0.03      | 10.31     | 0.00    |
| cognitive_health             | (Intercept)       | -0.58    | 0.01      | -45.02    | 0.00    |
|                              | Below average     | 0.04     | 0.05      | 0.74      | 0.46    |
| mental_health                | (Intercept)       | -0.58    | 0.01      | -43.13    | 0.00    |
|                              | Below average     | 0.00     | 0.04      | 0.07      | 0.94    |
| illness_experience           | (Intercept)       | -0.64    | 0.02      | -38.97    | 0.00    |
|                              | Yes               | 0.14     | 0.03      | 5.57      | 0.00    |
| brain_disease_caregiver      | (Intercept)       | -0.60    | 0.02      | -34.83    | 0.00    |
|                              | Yes               | 0.04     | 0.03      | 1.58      | 0.11    |
| brain_research_participation | (Intercept)       | -0.61    | 0.02      | -36.13    | 0.00    |
|                              | Yes               | 0.05     | 0.03      | 2.11      | 0.03    |
| relationship                 | (Intercept)       | -0.58    | 0.02      | -30.68    | 0.00    |
|                              | Stable            | 0.00     | 0.03      | -0.05     | 0.96    |

## 1.2.2 Question 1: binary - Profession

| fct                          | term              | estimate | std.error | statistic | p.value |
|------------------------------|-------------------|----------|-----------|-----------|---------|
|                              | (Intercept)       | 0.13     | 0.02      | 7.30      | 0.00    |
| age                          | 41-60             | 0.15     | 0.03      | 5.61      | 0.00    |
|                              | <= 40             | 0.29     | 0.04      | 8.08      | 0.00    |
| education                    | (Intercept)       | 0.32     | 0.01      | 21.78     | 0.00    |
|                              | Lower             | -0.28    | 0.03      | -10.78    | 0.00    |
| gender                       | (Intercept)       | 0.19     | 0.01      | 12.91     | 0.00    |
|                              | Man               | 0.17     | 0.03      | 6.11      | 0.00    |
|                              | Other/Undisclosed | -0.01    | 0.18      | -0.07     | 0.95    |
| healthcare_experience        | (Intercept)       | 0.15     | 0.02      | 9.99      | 0.00    |
|                              | Yes               | 0.20     | 0.03      | 8.10      | 0.00    |
| cognitive_health             | (Intercept)       | 0.24     | 0.01      | 19.47     | 0.00    |
|                              | Below average     | -0.20    | 0.05      | -3.92     | 0.00    |
| mental_health                | (Intercept)       | 0.25     | 0.01      | 19.12     | 0.00    |
|                              | Below average     | -0.13    | 0.04      | -3.69     | 0.00    |
| illness_experience           | (Intercept)       | 0.26     | 0.02      | 16.25     | 0.00    |
|                              | Yes               | -0.06    | 0.02      | -2.38     | 0.02    |
| brain_disease_caregiver      | (Intercept)       | 0.29     | 0.02      | 17.29     | 0.00    |
|                              | Yes               | -0.12    | 0.02      | -4.94     | 0.00    |
| brain_research_participation | (Intercept)       | 0.29     | 0.02      | 18.13     | 0.00    |
|                              | Yes               | -0.14    | 0.02      | -5.77     | 0.00    |
| relationship                 | (Intercept)       | 0.24     | 0.02      | 13.32     | 0.00    |
|                              | Stable            | -0.02    | 0.02      | -0.86     | 0.39    |

## 1.2.3 Question 1: binary - Education

| fct                          | term              | estimate | std.error | statistic | p.value |
|------------------------------|-------------------|----------|-----------|-----------|---------|
|                              | (Intercept)       | 0.44     | 0.02      | 24.30     | 0.00    |
| age                          | 41-60             | -0.07    | 0.03      | -2.57     | 0.01    |
|                              | <= 40             | 0.11     | 0.04      | 2.97      | 0.00    |
| education                    | (Intercept)       | 0.59     | 0.02      | 38.77     | 0.00    |
|                              | Lower             | -0.48    | 0.03      | -18.32    | 0.00    |
| gender                       | (Intercept)       | 0.40     | 0.01      | 27.28     | 0.00    |
|                              | Man               | 0.12     | 0.03      | 4.40      | 0.00    |
|                              | Other/Undisclosed | 0.20     | 0.19      | 1.09      | 0.28    |
| healthcare_experience        | (Intercept)       | 0.32     | 0.02      | 20.77     | 0.00    |
|                              | Yes               | 0.29     | 0.03      | 11.23     | 0.00    |
| cognitive_health             | (Intercept)       | 0.46     | 0.01      | 35.77     | 0.00    |
|                              | Below average     | -0.39    | 0.05      | -7.57     | 0.00    |
| mental_health                | (Intercept)       | 0.48     | 0.01      | 35.81     | 0.00    |
|                              | Below average     | -0.33    | 0.04      | -9.05     | 0.00    |
| illness_experience           | (Intercept)       | 0.47     | 0.02      | 29.52     | 0.00    |
|                              | Yes               | -0.10    | 0.03      | -4.03     | 0.00    |
| brain_disease_caregiver      | (Intercept)       | 0.47     | 0.02      | 27.85     | 0.00    |
|                              | Yes               | -0.08    | 0.02      | -3.40     | 0.00    |
| brain_research_participation | (Intercept)       | 0.44     | 0.02      | 26.81     | 0.00    |
|                              | Yes               | -0.02    | 0.02      | -0.61     | 0.54    |
| relationship                 | (Intercept)       | 0.42     | 0.02      | 22.55     | 0.00    |
|                              | Stable            | 0.03     | 0.02      | 1.03      | 0.30    |



## 1.2.4 Question 1: binary - Diet

| fct                          | term              | estimate | std.error | statistic | p.value |
|------------------------------|-------------------|----------|-----------|-----------|---------|
|                              | (Intercept)       | 0.69     | 0.02      | 36.76     | 0.00    |
| age                          | 41-60             | 0.43     | 0.03      | 14.59     | 0.00    |
|                              | <= 40             | 0.47     | 0.04      | 11.71     | 0.00    |
| education                    | (Intercept)       | 1.00     | 0.02      | 60.83     | 0.00    |
|                              | Lower             | -0.24    | 0.03      | -8.44     | 0.00    |
| gender                       | (Intercept)       | 1.03     | 0.02      | 63.33     | 0.00    |
|                              | Man               | -0.36    | 0.03      | -12.40    | 0.00    |
|                              | Other/Undisclosed | -0.06    | 0.20      | -0.32     | 0.75    |
| healthcare_experience        | (Intercept)       | 0.80     | 0.02      | 48.06     | 0.00    |
|                              | Yes               | 0.33     | 0.03      | 11.70     | 0.00    |
| cognitive_health             | (Intercept)       | 0.95     | 0.01      | 68.49     | 0.00    |
|                              | Below average     | -0.46    | 0.05      | -8.67     | 0.00    |
| mental_health                | (Intercept)       | 0.96     | 0.01      | 66.14     | 0.00    |
|                              | Below average     | -0.26    | 0.04      | -6.77     | 0.00    |
| illness_experience           | (Intercept)       | 0.98     | 0.02      | 55.61     | 0.00    |
|                              | Yes               | -0.13    | 0.03      | -4.76     | 0.00    |
| brain_disease_caregiver      | (Intercept)       | 0.85     | 0.02      | 46.89     | 0.00    |
|                              | Yes               | 0.17     | 0.03      | 6.29      | 0.00    |
| brain_research_participation | (Intercept)       | 0.90     | 0.02      | 51.08     | 0.00    |
|                              | Yes               | 0.04     | 0.03      | 1.59      | 0.11    |
| relationship                 | (Intercept)       | 0.94     | 0.02      | 46.61     | 0.00    |
|                              | Stable            | -0.04    | 0.03      | -1.41     | 0.16    |

## 1.2.5 Question 1: binary - Physical environment

| fct                          | term              | estimate | std.error | statistic | p.value |
|------------------------------|-------------------|----------|-----------|-----------|---------|
|                              | (Intercept)       | 0.84     | 0.02      | 43.31     | 0.00    |
| age                          | 41-60             | 0.23     | 0.03      | 7.59      | 0.00    |
|                              | <= 40             | 0.09     | 0.04      | 2.42      | 0.02    |
| education                    | (Intercept)       | 0.92     | 0.02      | 56.95     | 0.00    |
|                              | Lower             | 0.06     | 0.03      | 1.90      | 0.06    |
| gender                       | (Intercept)       | 0.98     | 0.02      | 60.95     | 0.00    |
|                              | Man               | -0.15    | 0.03      | -5.16     | 0.00    |
|                              | Other/Undisclosed | 0.27     | 0.21      | 1.27      | 0.20    |
| healthcare_experience        | (Intercept)       | 0.87     | 0.02      | 51.54     | 0.00    |
|                              | Yes               | 0.17     | 0.03      | 6.27      | 0.00    |
| cognitive_health             | (Intercept)       | 0.95     | 0.01      | 68.45     | 0.00    |
|                              | Below average     | -0.23    | 0.05      | -4.22     | 0.00    |
| mental_health                | (Intercept)       | 0.95     | 0.01      | 65.66     | 0.00    |
|                              | Below average     | -0.09    | 0.04      | -2.29     | 0.02    |
| illness_experience           | (Intercept)       | 0.88     | 0.02      | 51.40     | 0.00    |
|                              | Yes               | 0.13     | 0.03      | 4.88      | 0.00    |
| brain_disease_caregiver      | (Intercept)       | 0.92     | 0.02      | 50.32     | 0.00    |
|                              | Yes               | 0.03     | 0.03      | 1.25      | 0.21    |
| brain_research_participation | (Intercept)       | 0.93     | 0.02      | 52.21     | 0.00    |
|                              | Yes               | 0.02     | 0.03      | 0.65      | 0.52    |
| relationship                 | (Intercept)       | 0.97     | 0.02      | 47.76     | 0.00    |
|                              | Stable            | -0.07    | 0.03      | -2.46     | 0.01    |

## 1.2.6 Question 1: binary - Life goals

| fct                          | term              | estimate | std.error | statistic | p.value |
|------------------------------|-------------------|----------|-----------|-----------|---------|
|                              | (Intercept)       | 1.06     | 0.02      | 52.30     | 0.00    |
| age                          | 41-60             | -0.05    | 0.03      | -1.73     | 0.08    |
|                              | <= 40             | -0.34    | 0.04      | -9.10     | 0.00    |
| education                    | (Intercept)       | 1.00     | 0.02      | 61.07     | 0.00    |
|                              | Lower             | -0.06    | 0.03      | -2.21     | 0.03    |
| gender                       | (Intercept)       | 1.02     | 0.02      | 62.87     | 0.00    |
|                              | Man               | -0.12    | 0.03      | -4.00     | 0.00    |
|                              | Other/Undisclosed | -0.13    | 0.20      | -0.66     | 0.51    |
| healthcare_experience        | (Intercept)       | 0.89     | 0.02      | 52.63     | 0.00    |
|                              | Yes               | 0.24     | 0.03      | 8.66      | 0.00    |
| cognitive_health             | (Intercept)       | 0.99     | 0.01      | 70.68     | 0.00    |
|                              | Below average     | -0.10    | 0.06      | -1.75     | 0.08    |
| mental_health                | (Intercept)       | 1.01     | 0.01      | 69.23     | 0.00    |
|                              | Below average     | -0.22    | 0.04      | -5.74     | 0.00    |
| illness_experience           | (Intercept)       | 0.97     | 0.02      | 55.48     | 0.00    |
|                              | Yes               | 0.03     | 0.03      | 1.12      | 0.26    |
| brain_disease_caregiver      | (Intercept)       | 1.00     | 0.02      | 53.83     | 0.00    |
|                              | Yes               | -0.04    | 0.03      | -1.44     | 0.15    |
| brain_research_participation | (Intercept)       | 1.05     | 0.02      | 57.29     | 0.00    |
|                              | Yes               | -0.14    | 0.03      | -5.19     | 0.00    |
| relationship                 | (Intercept)       | 0.98     | 0.02      | 47.91     | 0.00    |
|                              | Stable            | 0.01     | 0.03      | 0.45      | 0.65    |

## 1.2.7 Question 1: binary - Social environment

| fct                          | term              | estimate | std.error | statistic | p.value |
|------------------------------|-------------------|----------|-----------|-----------|---------|
|                              | (Intercept)       | 1.38     | 0.02      | 62.38     | 0.00    |
| age                          | 41-60             | 0.29     | 0.03      | 8.18      | 0.00    |
|                              | <= 40             | 0.55     | 0.05      | 10.93     | 0.00    |
| education                    | (Intercept)       | 1.63     | 0.02      | 82.78     | 0.00    |
|                              | Lower             | -0.18    | 0.03      | -5.46     | 0.00    |
| gender                       | (Intercept)       | 1.66     | 0.02      | 85.12     | 0.00    |
|                              | Man               | -0.32    | 0.03      | -9.48     | 0.00    |
|                              | Other/Undisclosed | 0.58     | 0.30      | 1.91      | 0.06    |
| healthcare_experience        | (Intercept)       | 1.43     | 0.02      | 73.23     | 0.00    |
|                              | Yes               | 0.39     | 0.03      | 11.55     | 0.00    |
| cognitive_health             | (Intercept)       | 1.59     | 0.02      | 95.96     | 0.00    |
|                              | Below average     | -0.41    | 0.06      | -6.76     | 0.00    |
| mental_health                | (Intercept)       | 1.56     | 0.02      | 91.36     | 0.00    |
|                              | Below average     | 0.03     | 0.05      | 0.62      | 0.53    |
| illness_experience           | (Intercept)       | 1.59     | 0.02      | 76.29     | 0.00    |
|                              | Yes               | -0.05    | 0.03      | -1.55     | 0.12    |
| brain_disease_caregiver      | (Intercept)       | 1.55     | 0.02      | 71.32     | 0.00    |
|                              | Yes               | 0.04     | 0.03      | 1.41      | 0.16    |
| brain_research_participation | (Intercept)       | 1.60     | 0.02      | 74.70     | 0.00    |
|                              | Yes               | -0.07    | 0.03      | -2.32     | 0.02    |
| relationship                 | (Intercept)       | 1.58     | 0.02      | 65.50     | 0.00    |
|                              | Stable            | -0.03    | 0.03      | -0.86     | 0.39    |

## 1.2.8 Question 1: binary - Sleeping habits

| fct                          | term              | estimate | std.error | statistic | p.value |
|------------------------------|-------------------|----------|-----------|-----------|---------|
|                              | (Intercept)       | 1.36     | 0.02      | 61.79     | 0.00    |
| age                          | 41-60             | 0.72     | 0.04      | 18.89     | 0.00    |
|                              | <= 40             | 1.02     | 0.06      | 17.61     | 0.00    |
| education                    | (Intercept)       | 1.80     | 0.02      | 86.24     | 0.00    |
|                              | Lower             | -0.18    | 0.04      | -5.11     | 0.00    |
| gender                       | (Intercept)       | 1.86     | 0.02      | 88.80     | 0.00    |
|                              | Man               | -0.39    | 0.04      | -10.87    | 0.00    |
|                              | Other/Undisclosed | 0.08     | 0.27      | 0.29      | 0.78    |
| healthcare_experience        | (Intercept)       | 1.63     | 0.02      | 78.39     | 0.00    |
|                              | Yes               | 0.30     | 0.04      | 8.36      | 0.00    |
| cognitive_health             | (Intercept)       | 1.74     | 0.02      | 99.75     | 0.00    |
|                              | Below average     | -0.08    | 0.07      | -1.21     | 0.23    |
| mental_health                | (Intercept)       | 1.70     | 0.02      | 95.01     | 0.00    |
|                              | Below average     | 0.29     | 0.05      | 5.28      | 0.00    |
| illness_experience           | (Intercept)       | 1.69     | 0.02      | 78.50     | 0.00    |
|                              | Yes               | 0.12     | 0.03      | 3.39      | 0.00    |
| brain_disease_caregiver      | (Intercept)       | 1.77     | 0.02      | 75.60     | 0.00    |
|                              | Yes               | -0.06    | 0.03      | -1.68     | 0.09    |
| brain_research_participation | (Intercept)       | 1.90     | 0.02      | 79.81     | 0.00    |
|                              | Yes               | -0.34    | 0.03      | -10.04    | 0.00    |
| relationship                 | (Intercept)       | 1.86     | 0.03      | 69.87     | 0.00    |
|                              | Stable            | -0.21    | 0.03      | -6.01     | 0.00    |

## 1.2.9 Question 1: binary - Physical health

| fct                          | term              | estimate | std.error | statistic | p.value |
|------------------------------|-------------------|----------|-----------|-----------|---------|
|                              | (Intercept)       | 1.87     | 0.03      | 71.58     | 0.00    |
| age                          | 41-60             | 0.13     | 0.04      | 3.28      | 0.00    |
|                              | <= 40             | 0.16     | 0.05      | 2.97      | 0.00    |
| education                    | (Intercept)       | 2.05     | 0.02      | 89.45     | 0.00    |
|                              | Lower             | -0.31    | 0.04      | -8.30     | 0.00    |
| gender                       | (Intercept)       | 2.02     | 0.02      | 90.79     | 0.00    |
|                              | Man               | -0.26    | 0.04      | -6.75     | 0.00    |
|                              | Other/Undisclosed | -0.29    | 0.25      | -1.14     | 0.25    |
| healthcare_experience        | (Intercept)       | 1.79     | 0.02      | 81.42     | 0.00    |
|                              | Yes               | 0.43     | 0.04      | 10.86     | 0.00    |
| cognitive_health             | (Intercept)       | 1.98     | 0.02      | 103.89    | 0.00    |
|                              | Below average     | -0.58    | 0.06      | -8.95     | 0.00    |
| mental_health                | (Intercept)       | 1.98     | 0.02      | 99.84     | 0.00    |
|                              | Below average     | -0.29    | 0.05      | -5.84     | 0.00    |
| illness_experience           | (Intercept)       | 2.02     | 0.02      | 83.15     | 0.00    |
|                              | Yes               | -0.19    | 0.04      | -5.27     | 0.00    |
| brain_disease_caregiver      | (Intercept)       | 1.90     | 0.02      | 77.40     | 0.00    |
|                              | Yes               | 0.10     | 0.04      | 2.75      | 0.01    |
| brain_research_participation | (Intercept)       | 1.92     | 0.02      | 80.03     | 0.00    |
|                              | Yes               | 0.05     | 0.04      | 1.46      | 0.14    |
| relationship                 | (Intercept)       | 1.90     | 0.03      | 70.39     | 0.00    |
|                              | Stable            | 0.07     | 0.04      | 1.84      | 0.07    |

## 1.2.10 Question 1: binary - Genetics

| fct                          | term              | estimate | std.error | statistic | p.value |
|------------------------------|-------------------|----------|-----------|-----------|---------|
|                              | (Intercept)       | 1.62     | 0.02      | 67.72     | 0.00    |
| age                          | 41-60             | 0.01     | 0.04      | 0.27      | 0.79    |
|                              | <= 40             | -0.43    | 0.04      | -10.19    | 0.00    |
| education                    | (Intercept)       | 1.56     | 0.02      | 81.15     | 0.00    |
|                              | Lower             | -0.06    | 0.03      | -1.67     | 0.09    |
| gender                       | (Intercept)       | 1.61     | 0.02      | 84.01     | 0.00    |
|                              | Man               | -0.23    | 0.03      | -6.74     | 0.00    |
|                              | Other/Undisclosed | -0.77    | 0.20      | -3.97     | 0.00    |
| healthcare_experience        | (Intercept)       | 1.50     | 0.02      | 75.21     | 0.00    |
|                              | Yes               | 0.12     | 0.03      | 3.52      | 0.00    |
| cognitive_health             | (Intercept)       | 1.55     | 0.02      | 94.77     | 0.00    |
|                              | Below average     | -0.19    | 0.06      | -2.94     | 0.00    |
| mental_health                | (Intercept)       | 1.54     | 0.02      | 90.69     | 0.00    |
|                              | Below average     | 0.01     | 0.05      | 0.27      | 0.79    |
| illness_experience           | (Intercept)       | 1.52     | 0.02      | 74.65     | 0.00    |
|                              | Yes               | 0.06     | 0.03      | 1.74      | 0.08    |
| brain_disease_caregiver      | (Intercept)       | 1.37     | 0.02      | 66.76     | 0.00    |
|                              | Yes               | 0.39     | 0.03      | 12.18     | 0.00    |
| brain_research_participation | (Intercept)       | 1.45     | 0.02      | 71.10     | 0.00    |
|                              | Yes               | 0.22     | 0.03      | 6.69      | 0.00    |
| relationship                 | (Intercept)       | 1.44     | 0.02      | 62.39     | 0.00    |
|                              | Stable            | 0.18     | 0.03      | 5.83      | 0.00    |

## 1.2.11 Question 1: binary - Substance use

| fct                          | term              | estimate | std.error | statistic | p.value |
|------------------------------|-------------------|----------|-----------|-----------|---------|
|                              | (Intercept)       | 2.26     | 0.03      | 74.47     | 0.00    |
| age                          | 41-60             | 0.53     | 0.05      | 10.25     | 0.00    |
|                              | <= 40             | 0.36     | 0.07      | 5.35      | 0.00    |
| education                    | (Intercept)       | 2.59     | 0.03      | 90.65     | 0.00    |
|                              | Lower             | -0.28    | 0.05      | -6.03     | 0.00    |
| gender                       | (Intercept)       | 2.63     | 0.03      | 92.09     | 0.00    |
|                              | Man               | -0.42    | 0.05      | -8.88     | 0.00    |
|                              | Other/Undisclosed | -0.83    | 0.26      | -3.24     | 0.00    |
| healthcare_experience        | (Intercept)       | 2.35     | 0.03      | 86.09     | 0.00    |
|                              | Yes               | 0.41     | 0.05      | 8.25      | 0.00    |
| cognitive_health             | (Intercept)       | 2.54     | 0.02      | 106.27    | 0.00    |
|                              | Below average     | -0.63    | 0.08      | -8.13     | 0.00    |
| mental_health                | (Intercept)       | 2.51     | 0.02      | 102.24    | 0.00    |
|                              | Below average     | -0.13    | 0.06      | -1.95     | 0.05    |
| illness_experience           | (Intercept)       | 2.58     | 0.03      | 84.53     | 0.00    |
|                              | Yes               | -0.21    | 0.05      | -4.59     | 0.00    |
| brain_disease_caregiver      | (Intercept)       | 2.44     | 0.03      | 80.36     | 0.00    |
|                              | Yes               | 0.12     | 0.05      | 2.66      | 0.01    |
| brain_research_participation | (Intercept)       | 2.49     | 0.03      | 82.75     | 0.00    |
|                              | Yes               | 0.00     | 0.05      | 0.09      | 0.93    |
| relationship                 | (Intercept)       | 2.45     | 0.03      | 72.93     | 0.00    |
|                              | Stable            | 0.08     | 0.05      | 1.78      | 0.08    |



1  
2  
3 **1.3 ordinal**  
4  
5  
6  
7  
8  
9  
10  
11  
12  
13  
14  
15  
16  
17  
18  
19  
20  
21  
22  
23  
24  
25  
26  
27  
28  
29  
30  
31  
32  
33  
34  
35  
36  
37  
38  
39  
40  
41  
42  
43  
44  
45  
46  
47  
48  
49  
50  
51  
52  
53  
54  
55  
56  
57  
58  
59  
60

For peer review only

1  
2  
3  
4  
5  
6  
7  
8  
9  
10  
11  
12  
13  
14  
15  
16  
17  
18  
19  
20  
21  
22  
23  
24  
25  
26  
27  
28  
29  
30  
31  
32  
33  
34  
35  
36  
37  
38  
39  
40  
41  
42  
43  
44  
45  
46  
47  
48  
49  
50  
51  
52  
53  
54  
55  
56  
57  
58  
59  
60

For peer review only

## 1.3.1 Question 1: ordinal - Income

| fct                     | term               | estimate | std.error | statistic | coef.type   |
|-------------------------|--------------------|----------|-----------|-----------|-------------|
| age                     | 41-60              | 0.04     | 0.02      | 1.54      | coefficient |
|                         | <= 40              | 0.28     | 0.03      | 8.59      | coefficient |
|                         | Very strong Strong | -2.67    | 0.03      | -96.49    | scale       |
|                         | Strong Moderate    | -0.53    | 0.02      | -30.55    | scale       |
|                         | Moderate Weak      | 1.47     | 0.02      | 75.45     | scale       |
|                         | Weak No influence  | 3.26     | 0.03      | 97.40     | scale       |
| education               | Lower              | -0.09    | 0.02      | -3.53     | coefficient |
|                         | Very strong Strong | -2.75    | 0.03      | -104.63   | scale       |
|                         | Strong Moderate    | -0.61    | 0.01      | -41.51    | scale       |
|                         | Moderate Weak      | 1.38     | 0.02      | 82.24     | scale       |
|                         | Weak No influence  | 3.17     | 0.03      | 99.42     | scale       |
| gender                  | Man                | 0.12     | 0.02      | 4.63      | coefficient |
|                         | Other/Undisclosed  | -0.18    | 0.17      | -1.02     | coefficient |
|                         | Very strong Strong | -2.69    | 0.03      | -103.57   | scale       |
|                         | Strong Moderate    | -0.55    | 0.01      | -38.47    | scale       |
|                         | Moderate Weak      | 1.44     | 0.02      | 85.65     | scale       |
| healthcare_experience   | Weak No influence  | 3.23     | 0.03      | 101.07    | scale       |
|                         | Yes                | -0.29    | 0.02      | -12.49    | coefficient |
|                         | Very strong Strong | -2.84    | 0.03      | -105.35   | scale       |
|                         | Strong Moderate    | -0.70    | 0.02      | -44.58    | scale       |
|                         | Moderate Weak      | 1.30     | 0.02      | 75.45     | scale       |
| cognitive_health        | Weak No influence  | 3.09     | 0.03      | 96.52     | scale       |
|                         | Below average      | 0.10     | 0.05      | 2.11      | coefficient |
|                         | Very strong Strong | -2.72    | 0.03      | -107.62   | scale       |
|                         | Strong Moderate    | -0.58    | 0.01      | -44.84    | scale       |
|                         | Moderate Weak      | 1.42     | 0.02      | 91.57     | scale       |
| mental_health           | Weak No influence  | 3.20     | 0.03      | 102.60    | scale       |
|                         | Below average      | 0.06     | 0.03      | 1.68      | coefficient |
|                         | Very strong Strong | -2.72    | 0.03      | -106.70   | scale       |
|                         | Strong Moderate    | -0.58    | 0.01      | -43.37    | scale       |
|                         | Moderate Weak      | 1.42     | 0.02      | 89.62     | scale       |
| illness_experience      | Weak No influence  | 3.20     | 0.03      | 102.06    | scale       |
|                         | Yes                | -0.12    | 0.02      | -5.38     | coefficient |
|                         | Very strong Strong | -2.77    | 0.03      | -103.25   | scale       |
|                         | Strong Moderate    | -0.63    | 0.02      | -40.50    | scale       |
|                         | Moderate Weak      | 1.36     | 0.02      | 77.59     | scale       |
| brain_disease_caregiver | Weak No influence  | 3.15     | 0.03      | 97.60     | scale       |
|                         | Yes                | -0.04    | 0.02      | -1.64     | coefficient |
|                         | Very strong Strong | -2.74    | 0.03      | -100.65   | scale       |
| brain_disease_caregiver | Strong Moderate    | -0.60    | 0.02      | -36.65    | scale       |
|                         | Moderate Weak      | 1.39     | 0.02      | 75.87     | scale       |

1  
2  
3  
4  
5  
6  
7  
8  
9  
10  
11  
12  
13  
14  
15  
16  
17  
18  
19  
20  
21  
22  
23  
24  
25  
26  
27  
28  
29  
30  
31  
32  
33  
34  
35  
36  
37  
38  
39  
40  
41  
42  
43  
44  
45  
46  
47  
48  
49  
50  
51  
52  
53  
54  
55  
56  
57  
58  
59  
60

For peer review only

## 1.3.2 Question 1: ordinal - Profession

| fct                     | term               | estimate | std.error | statistic | coef.type   |
|-------------------------|--------------------|----------|-----------|-----------|-------------|
| age                     | 41-60              | -0.17    | 0.02      | -7.01     | coefficient |
|                         | <= 40              | -0.38    | 0.03      | -11.75    | coefficient |
|                         | Very strong Strong | -2.04    | 0.02      | -92.50    | scale       |
|                         | Strong Moderate    | 0.11     | 0.02      | 6.35      | scale       |
|                         | Moderate Weak      | 2.17     | 0.02      | 91.21     | scale       |
|                         | Weak No influence  | 3.75     | 0.04      | 85.03     | scale       |
| education               | Lower              | 0.30     | 0.02      | 12.53     | coefficient |
|                         | Very strong Strong | -1.82    | 0.02      | -94.52    | scale       |
|                         | Strong Moderate    | 0.33     | 0.01      | 22.77     | scale       |
|                         | Moderate Weak      | 2.39     | 0.02      | 106.10    | scale       |
|                         | Weak No influence  | 3.97     | 0.04      | 91.30     | scale       |
| gender                  | Man                | -0.14    | 0.02      | -5.56     | coefficient |
|                         | Other/Undisclosed  | 0.00     | 0.17      | -0.01     | coefficient |
|                         | Very strong Strong | -1.94    | 0.02      | -99.89    | scale       |
|                         | Strong Moderate    | 0.19     | 0.01      | 13.84     | scale       |
|                         | Moderate Weak      | 2.25     | 0.02      | 102.78    | scale       |
| healthcare_experience   | Weak No influence  | 3.83     | 0.04      | 88.77     | scale       |
|                         | Yes                | -0.22    | 0.02      | -9.65     | coefficient |
|                         | Very strong Strong | -1.99    | 0.02      | -98.03    | scale       |
|                         | Strong Moderate    | 0.15     | 0.02      | 9.79      | scale       |
|                         | Moderate Weak      | 2.20     | 0.02      | 98.33     | scale       |
| cognitive_health        | Weak No influence  | 3.79     | 0.04      | 87.28     | scale       |
|                         | Below average      | 0.24     | 0.05      | 5.08      | coefficient |
|                         | Very strong Strong | -1.89    | 0.02      | -104.23   | scale       |
|                         | Strong Moderate    | 0.25     | 0.01      | 19.74     | scale       |
|                         | Moderate Weak      | 2.30     | 0.02      | 109.13    | scale       |
| mental_health           | Weak No influence  | 3.89     | 0.04      | 90.82     | scale       |
|                         | Below average      | 0.10     | 0.03      | 3.13      | coefficient |
|                         | Very strong Strong | -1.89    | 0.02      | -102.62   | scale       |
|                         | Strong Moderate    | 0.25     | 0.01      | 19.05     | scale       |
|                         | Moderate Weak      | 2.30     | 0.02      | 107.74    | scale       |
| illness_experience      | Weak No influence  | 3.88     | 0.04      | 90.52     | scale       |
|                         | Yes                | 0.05     | 0.02      | 2.17      | coefficient |
|                         | Very strong Strong | -1.88    | 0.02      | -93.76    | scale       |
|                         | Strong Moderate    | 0.25     | 0.02      | 16.56     | scale       |
|                         | Moderate Weak      | 2.31     | 0.02      | 101.00    | scale       |
| brain_disease_caregiver | Weak No influence  | 3.89     | 0.04      | 89.08     | scale       |
|                         | Yes                | 0.13     | 0.02      | 6.01      | coefficient |
|                         | Very strong Strong | -1.84    | 0.02      | -91.51    | scale       |
| brain_disease_caregiver | Strong Moderate    | 0.30     | 0.02      | 18.37     | scale       |
|                         | Moderate Weak      | 2.35     | 0.02      | 100.01    | scale       |

1  
2  
3  
4  
5  
6  
7  
8  
9  
10  
11  
12  
13  
14  
15  
16  
17  
18  
19  
20  
21  
22  
23  
24  
25  
26  
27  
28  
29  
30  
31  
32  
33  
34  
35  
36  
37  
38  
39  
40  
41  
42  
43  
44  
45  
46  
47  
48  
49  
50  
51  
52  
53  
54  
55  
56  
57  
58  
59  
60

For peer review only

## 1.3.3 Question 1: ordinal - Education

| fct                     | term               | estimate | std.error | statistic | coef.type   |
|-------------------------|--------------------|----------|-----------|-----------|-------------|
| age                     | 41-60              | 0.04     | 0.02      | 1.78      | coefficient |
|                         | <= 40              | -0.23    | 0.03      | -7.05     | coefficient |
|                         | Very strong Strong | -1.57    | 0.02      | -78.90    | scale       |
|                         | Strong Moderate    | 0.41     | 0.02      | 24.25     | scale       |
|                         | Moderate Weak      | 2.40     | 0.03      | 95.97     | scale       |
|                         | Weak No influence  | 4.09     | 0.05      | 83.03     | scale       |
| education               | Lower              | 0.49     | 0.02      | 20.39     | coefficient |
|                         | Very strong Strong | -1.41    | 0.02      | -82.11    | scale       |
|                         | Strong Moderate    | 0.59     | 0.01      | 40.19     | scale       |
|                         | Moderate Weak      | 2.59     | 0.02      | 108.65    | scale       |
|                         | Weak No influence  | 4.29     | 0.05      | 87.97     | scale       |
|                         | Man                | -0.10    | 0.02      | -3.93     | coefficient |
| gender                  | Other/Undisclosed  | -0.15    | 0.17      | -0.89     | coefficient |
|                         | Very strong Strong | -1.57    | 0.02      | -90.20    | scale       |
|                         | Strong Moderate    | 0.41     | 0.01      | 28.67     | scale       |
|                         | Moderate Weak      | 2.39     | 0.02      | 103.91    | scale       |
|                         | Weak No influence  | 4.08     | 0.05      | 84.51     | scale       |
|                         | Yes                | -0.30    | 0.02      | -13.11    | coefficient |
| healthcare_experience   | Very strong Strong | -1.67    | 0.02      | -89.89    | scale       |
|                         | Strong Moderate    | 0.32     | 0.02      | 21.11     | scale       |
|                         | Moderate Weak      | 2.31     | 0.02      | 98.63     | scale       |
|                         | Weak No influence  | 4.00     | 0.05      | 82.61     | scale       |
|                         | Below average      | 0.41     | 0.05      | 8.71      | coefficient |
|                         | Very strong Strong | -1.52    | 0.02      | -95.08    | scale       |
| cognitive_health        | Strong Moderate    | 0.46     | 0.01      | 36.06     | scale       |
|                         | Moderate Weak      | 2.45     | 0.02      | 109.73    | scale       |
|                         | Weak No influence  | 4.14     | 0.05      | 86.28     | scale       |
|                         | Below average      | 0.32     | 0.03      | 9.56      | coefficient |
|                         | Very strong Strong | -1.51    | 0.02      | -92.50    | scale       |
|                         | Strong Moderate    | 0.47     | 0.01      | 36.15     | scale       |
| mental_health           | Moderate Weak      | 2.46     | 0.02      | 109.02    | scale       |
|                         | Weak No influence  | 4.15     | 0.05      | 86.39     | scale       |
|                         | Yes                | 0.10     | 0.02      | 4.43      | coefficient |
|                         | Very strong Strong | -1.51    | 0.02      | -82.88    | scale       |
|                         | Strong Moderate    | 0.47     | 0.02      | 30.73     | scale       |
|                         | Moderate Weak      | 2.46     | 0.02      | 102.68    | scale       |
| illness_experience      | Weak No influence  | 4.15     | 0.05      | 85.13     | scale       |
|                         | Yes                | 0.10     | 0.02      | 4.28      | coefficient |
|                         | Very strong Strong | -1.50    | 0.02      | -79.77    | scale       |
|                         | Strong Moderate    | 0.48     | 0.02      | 29.47     | scale       |
|                         | Moderate Weak      | 2.46     | 0.02      | 100.62    | scale       |
|                         | Weak No influence  | 4.15     | 0.05      | 85.13     | scale       |
| brain_disease_caregiver | Yes                | 0.10     | 0.02      | 4.28      | coefficient |
|                         | Very strong Strong | -1.50    | 0.02      | -79.77    | scale       |

1  
2  
3  
4  
5  
6  
7  
8  
9  
10  
11  
12  
13  
14  
15  
16  
17  
18  
19  
20  
21  
22  
23  
24  
25  
26  
27  
28  
29  
30  
31  
32  
33  
34  
35  
36  
37  
38  
39  
40  
41  
42  
43  
44  
45  
46  
47  
48  
49  
50  
51  
52  
53  
54  
55  
56  
57  
58  
59  
60

For peer review only



## 1.3.4 Question 1: ordinal - Diet

| fct                     | term               | estimate | std.error | statistic | coef.type   |
|-------------------------|--------------------|----------|-----------|-----------|-------------|
| age                     | 41-60              | -0.42    | 0.02      | -17.02    | coefficient |
|                         | <= 40              | -0.53    | 0.03      | -16.22    | coefficient |
|                         | Very strong Strong | -1.45    | 0.02      | -73.97    | scale       |
|                         | Strong Moderate    | 0.69     | 0.02      | 38.82     | scale       |
|                         | Moderate Weak      | 2.84     | 0.03      | 91.06     | scale       |
|                         | Weak No influence  | 4.61     | 0.07      | 66.73     | scale       |
| education               | Lower              | 0.24     | 0.02      | 9.83      | coefficient |
|                         | Very strong Strong | -1.12    | 0.02      | -69.89    | scale       |
|                         | Strong Moderate    | 1.00     | 0.02      | 64.10     | scale       |
|                         | Moderate Weak      | 3.15     | 0.03      | 103.15    | scale       |
|                         | Weak No influence  | 4.91     | 0.07      | 71.39     | scale       |
| gender                  | Man                | 0.30     | 0.03      | 12.07     | coefficient |
|                         | Other/Undisclosed  | -0.10    | 0.17      | -0.60     | coefficient |
|                         | Very strong Strong | -1.11    | 0.02      | -70.49    | scale       |
|                         | Strong Moderate    | 1.01     | 0.02      | 65.61     | scale       |
|                         | Moderate Weak      | 3.16     | 0.03      | 103.75    | scale       |
| healthcare_experience   | Weak No influence  | 4.93     | 0.07      | 71.62     | scale       |
|                         | Yes                | -0.33    | 0.02      | -14.24    | coefficient |
|                         | Very strong Strong | -1.32    | 0.02      | -76.47    | scale       |
|                         | Strong Moderate    | 0.80     | 0.02      | 50.56     | scale       |
|                         | Moderate Weak      | 2.95     | 0.03      | 97.17     | scale       |
| cognitive_health        | Weak No influence  | 4.72     | 0.07      | 68.63     | scale       |
|                         | Below average      | 0.39     | 0.05      | 8.06      | coefficient |
|                         | Very strong Strong | -1.17    | 0.01      | -80.54    | scale       |
|                         | Strong Moderate    | 0.95     | 0.01      | 68.82     | scale       |
|                         | Moderate Weak      | 3.10     | 0.03      | 104.69    | scale       |
| mental_health           | Weak No influence  | 4.86     | 0.07      | 71.06     | scale       |
|                         | Below average      | 0.20     | 0.03      | 5.93      | coefficient |
|                         | Very strong Strong | -1.16    | 0.01      | -78.30    | scale       |
|                         | Strong Moderate    | 0.95     | 0.01      | 67.03     | scale       |
|                         | Moderate Weak      | 3.10     | 0.03      | 104.07    | scale       |
| illness_experience      | Weak No influence  | 4.86     | 0.07      | 70.99     | scale       |
|                         | Yes                | 0.10     | 0.02      | 4.22      | coefficient |
|                         | Very strong Strong | -1.15    | 0.02      | -68.03    | scale       |
|                         | Strong Moderate    | 0.96     | 0.02      | 58.79     | scale       |
|                         | Moderate Weak      | 3.11     | 0.03      | 100.68    | scale       |
| brain_disease_caregiver | Weak No influence  | 4.87     | 0.07      | 70.65     | scale       |
|                         | Yes                | -0.16    | 0.02      | -6.94     | coefficient |
|                         | Very strong Strong | -1.26    | 0.02      | -70.21    | scale       |
| brain_disease_caregiver | Strong Moderate    | 0.85     | 0.02      | 50.29     | scale       |
|                         | Moderate Weak      | 3.00     | 0.03      | 96.71     | scale       |

1  
2  
3  
4  
5  
6  
7  
8  
9  
10  
11  
12  
13  
14  
15  
16  
17  
18  
19  
20  
21  
22  
23  
24  
25  
26  
27  
28  
29  
30  
31  
32  
33  
34  
35  
36  
37  
38  
39  
40  
41  
42  
43  
44  
45  
46  
47  
48  
49  
50  
51  
52  
53  
54  
55  
56  
57  
58  
59  
60

For peer review only

## 1.3.5 Question 1: ordinal - Physical environment

| fct                     | term               | estimate | std.error | statistic | coef.type   |
|-------------------------|--------------------|----------|-----------|-----------|-------------|
| age                     | 41-60              | -0.20    | 0.02      | -8.20     | coefficient |
|                         | <= 40              | -0.13    | 0.03      | -3.99     | coefficient |
|                         | Very strong Strong | -1.17    | 0.02      | -62.60    | scale       |
|                         | Strong Moderate    | 0.84     | 0.02      | 46.96     | scale       |
|                         | Moderate Weak      | 3.06     | 0.03      | 93.95     | scale       |
|                         | Weak No influence  | 5.48     | 0.10      | 55.39     | scale       |
| education               | Lower              | -0.06    | 0.02      | -2.28     | coefficient |
|                         | Very strong Strong | -1.09    | 0.02      | -68.64    | scale       |
|                         | Strong Moderate    | 0.92     | 0.02      | 59.88     | scale       |
|                         | Moderate Weak      | 3.14     | 0.03      | 100.07    | scale       |
|                         | Weak No influence  | 5.55     | 0.10      | 56.38     | scale       |
| gender                  | Man                | 0.16     | 0.02      | 6.41      | coefficient |
|                         | Other/Undisclosed  | -0.29    | 0.17      | -1.72     | coefficient |
|                         | Very strong Strong | -1.03    | 0.02      | -66.41    | scale       |
|                         | Strong Moderate    | 0.98     | 0.02      | 64.11     | scale       |
|                         | Moderate Weak      | 3.20     | 0.03      | 101.87    | scale       |
|                         | Weak No influence  | 5.62     | 0.10      | 57.01     | scale       |
| healthcare_experience   | Yes                | -0.19    | 0.02      | -8.16     | coefficient |
|                         | Very strong Strong | -1.14    | 0.02      | -68.64    | scale       |
|                         | Strong Moderate    | 0.87     | 0.02      | 54.34     | scale       |
|                         | Moderate Weak      | 3.09     | 0.03      | 97.71     | scale       |
|                         | Weak No influence  | 5.50     | 0.10      | 55.82     | scale       |
| cognitive_health        | Below average      | 0.19     | 0.05      | 3.84      | coefficient |
|                         | Very strong Strong | -1.06    | 0.01      | -75.12    | scale       |
|                         | Strong Moderate    | 0.95     | 0.01      | 68.97     | scale       |
|                         | Moderate Weak      | 3.17     | 0.03      | 103.33    | scale       |
|                         | Weak No influence  | 5.58     | 0.10      | 56.80     | scale       |
| mental_health           | Below average      | 0.07     | 0.03      | 2.05      | coefficient |
|                         | Very strong Strong | -1.06    | 0.01      | -73.20    | scale       |
|                         | Strong Moderate    | 0.95     | 0.01      | 66.89     | scale       |
|                         | Moderate Weak      | 3.16     | 0.03      | 102.66    | scale       |
|                         | Weak No influence  | 5.58     | 0.10      | 56.74     | scale       |
| illness_experience      | Yes                | -0.13    | 0.02      | -5.86     | coefficient |
|                         | Very strong Strong | -1.12    | 0.02      | -66.98    | scale       |
|                         | Strong Moderate    | 0.88     | 0.02      | 54.73     | scale       |
|                         | Moderate Weak      | 3.10     | 0.03      | 97.86     | scale       |
|                         | Weak No influence  | 5.52     | 0.10      | 55.96     | scale       |
| brain_disease_caregiver | Yes                | -0.04    | 0.02      | -1.69     | coefficient |
|                         | Very strong Strong | -1.09    | 0.02      | -62.46    | scale       |
|                         | Strong Moderate    | 0.92     | 0.02      | 54.10     | scale       |
|                         | Moderate Weak      | 3.14     | 0.03      | 97.48     | scale       |

1  
2  
3  
4  
5  
6  
7  
8  
9  
10  
11  
12  
13  
14  
15  
16  
17  
18  
19  
20  
21  
22  
23  
24  
25  
26  
27  
28  
29  
30  
31  
32  
33  
34  
35  
36  
37  
38  
39  
40  
41  
42  
43  
44  
45  
46  
47  
48  
49  
50  
51  
52  
53  
54  
55  
56  
57  
58  
59  
60

For peer review only

## 1.3.6 Question 1: ordinal - Life goals

| fct                     | term               | estimate | std.error | statistic | coef.type   |
|-------------------------|--------------------|----------|-----------|-----------|-------------|
| age                     | 41-60              | -0.02    | 0.02      | -0.88     | coefficient |
|                         | <= 40              | 0.17     | 0.03      | 5.32      | coefficient |
|                         | Very strong Strong | -1.01    | 0.02      | -55.68    | scale       |
|                         | Strong Moderate    | 1.00     | 0.02      | 55.54     | scale       |
|                         | Moderate Weak      | 2.92     | 0.03      | 98.26     | scale       |
|                         | Weak No influence  | 4.63     | 0.06      | 74.47     | scale       |
| education               | Lower              | 0.08     | 0.02      | 3.26      | coefficient |
|                         | Very strong Strong | -1.00    | 0.02      | -64.24    | scale       |
|                         | Strong Moderate    | 1.01     | 0.02      | 64.62     | scale       |
|                         | Moderate Weak      | 2.93     | 0.03      | 103.62    | scale       |
|                         | Weak No influence  | 4.63     | 0.06      | 75.38     | scale       |
| gender                  | Man                | 0.13     | 0.02      | 5.35      | coefficient |
|                         | Other/Undisclosed  | -0.06    | 0.17      | -0.35     | coefficient |
|                         | Very strong Strong | -0.99    | 0.02      | -64.50    | scale       |
|                         | Strong Moderate    | 1.02     | 0.02      | 66.35     | scale       |
|                         | Moderate Weak      | 2.94     | 0.03      | 104.41    | scale       |
| healthcare_experience   | Weak No influence  | 4.65     | 0.06      | 75.65     | scale       |
|                         | Yes                | -0.24    | 0.02      | -10.53    | coefficient |
|                         | Very strong Strong | -1.12    | 0.02      | -67.64    | scale       |
|                         | Strong Moderate    | 0.89     | 0.02      | 55.81     | scale       |
|                         | Moderate Weak      | 2.81     | 0.03      | 99.32     | scale       |
| cognitive_health        | Weak No influence  | 4.52     | 0.06      | 73.52     | scale       |
|                         | Below average      | 0.10     | 0.05      | 2.06      | coefficient |
|                         | Very strong Strong | -1.02    | 0.01      | -73.06    | scale       |
|                         | Strong Moderate    | 0.99     | 0.01      | 71.40     | scale       |
|                         | Moderate Weak      | 2.91     | 0.03      | 106.49    | scale       |
| mental_health           | Weak No influence  | 4.61     | 0.06      | 75.60     | scale       |
|                         | Below average      | 0.11     | 0.03      | 3.12      | coefficient |
|                         | Very strong Strong | -1.01    | 0.01      | -70.80    | scale       |
|                         | Strong Moderate    | 1.00     | 0.01      | 70.04     | scale       |
|                         | Moderate Weak      | 2.92     | 0.03      | 105.90    | scale       |
| illness_experience      | Weak No influence  | 4.62     | 0.06      | 75.60     | scale       |
|                         | Yes                | -0.04    | 0.02      | -1.74     | coefficient |
|                         | Very strong Strong | -1.04    | 0.02      | -63.01    | scale       |
|                         | Strong Moderate    | 0.97     | 0.02      | 59.31     | scale       |
|                         | Moderate Weak      | 2.89     | 0.03      | 100.89    | scale       |
| brain_disease_caregiver | Weak No influence  | 4.59     | 0.06      | 74.51     | scale       |
|                         | Yes                | 0.03     | 0.02      | 1.45      | coefficient |
|                         | Very strong Strong | -1.01    | 0.02      | -58.85    | scale       |
| brain_disease_caregiver | Strong Moderate    | 1.00     | 0.02      | 58.29     | scale       |
|                         | Moderate Weak      | 2.92     | 0.03      | 100.18    | scale       |

1  
2  
3  
4  
5  
6  
7  
8  
9  
10  
11  
12  
13  
14  
15  
16  
17  
18  
19  
20  
21  
22  
23  
24  
25  
26  
27  
28  
29  
30  
31  
32  
33  
34  
35  
36  
37  
38  
39  
40  
41  
42  
43  
44  
45  
46  
47  
48  
49  
50  
51  
52  
53  
54  
55  
56  
57  
58  
59  
60

For peer review only

## 1.3.7 Question 1: ordinal - Social environment

| fct                     | term               | estimate | std.error | statistic | coef.type   |
|-------------------------|--------------------|----------|-----------|-----------|-------------|
| age                     | 41-60              | -0.31    | 0.03      | -12.49    | coefficient |
|                         | <= 40              | -0.69    | 0.03      | -20.60    | coefficient |
|                         | Very strong Strong | -0.87    | 0.02      | -47.81    | scale       |
|                         | Strong Moderate    | 1.36     | 0.02      | 69.53     | scale       |
|                         | Moderate Weak      | 3.53     | 0.04      | 85.29     | scale       |
|                         | Weak No influence  | 5.54     | 0.11      | 51.62     | scale       |
| education               | Lower              | 0.14     | 0.02      | 5.87      | coefficient |
|                         | Very strong Strong | -0.58    | 0.01      | -39.71    | scale       |
|                         | Strong Moderate    | 1.61     | 0.02      | 90.26     | scale       |
|                         | Moderate Weak      | 3.78     | 0.04      | 92.66     | scale       |
|                         | Weak No influence  | 5.79     | 0.11      | 54.05     | scale       |
|                         | Man                | 0.26     | 0.03      | 10.44     | coefficient |
| gender                  | Other/Undisclosed  | -0.49    | 0.17      | -2.88     | coefficient |
|                         | Very strong Strong | -0.56    | 0.01      | -38.71    | scale       |
|                         | Strong Moderate    | 1.64     | 0.02      | 92.34     | scale       |
|                         | Moderate Weak      | 3.82     | 0.04      | 93.46     | scale       |
|                         | Weak No influence  | 5.82     | 0.11      | 54.36     | scale       |
|                         | Yes                | -0.33    | 0.02      | -14.11    | coefficient |
| healthcare_experience   | Very strong Strong | -0.76    | 0.02      | -47.99    | scale       |
|                         | Strong Moderate    | 1.45     | 0.02      | 80.46     | scale       |
|                         | Moderate Weak      | 3.62     | 0.04      | 88.81     | scale       |
|                         | Weak No influence  | 5.63     | 0.11      | 52.55     | scale       |
|                         | Below average      | 0.28     | 0.05      | 5.79      | coefficient |
|                         | Very strong Strong | -0.61    | 0.01      | -47.36    | scale       |
| cognitive_health        | Strong Moderate    | 1.58     | 0.02      | 97.31     | scale       |
|                         | Moderate Weak      | 3.76     | 0.04      | 93.54     | scale       |
|                         | Weak No influence  | 5.76     | 0.11      | 53.92     | scale       |
|                         | Below average      | -0.12    | 0.03      | -3.44     | coefficient |
|                         | Very strong Strong | -0.64    | 0.01      | -47.92    | scale       |
|                         | Strong Moderate    | 1.55     | 0.02      | 94.06     | scale       |
| mental_health           | Moderate Weak      | 3.72     | 0.04      | 92.56     | scale       |
|                         | Weak No influence  | 5.73     | 0.11      | 53.59     | scale       |
|                         | Yes                | 0.04     | 0.02      | 1.55      | coefficient |
|                         | Very strong Strong | -0.61    | 0.02      | -39.10    | scale       |
|                         | Strong Moderate    | 1.58     | 0.02      | 85.29     | scale       |
|                         | Moderate Weak      | 3.75     | 0.04      | 91.26     | scale       |
| illness_experience      | Weak No influence  | 5.76     | 0.11      | 53.69     | scale       |
|                         | Yes                | -0.02    | 0.02      | -0.99     | coefficient |
|                         | Very strong Strong | -0.64    | 0.01      | -47.63    | scale       |
|                         | Strong Moderate    | 1.56     | 0.02      | 81.28     | scale       |
|                         | Moderate Weak      | 3.73     | 0.04      | 90.09     | scale       |
|                         | Weak No influence  | 5.73     | 0.11      | 53.69     | scale       |
| brain_disease_caregiver | Yes                | 0.04     | 0.02      | 1.55      | coefficient |
|                         | Very strong Strong | -0.64    | 0.01      | -47.63    | scale       |

1  
2  
3  
4  
5  
6  
7  
8  
9  
10  
11  
12  
13  
14  
15  
16  
17  
18  
19  
20  
21  
22  
23  
24  
25  
26  
27  
28  
29  
30  
31  
32  
33  
34  
35  
36  
37  
38  
39  
40  
41  
42  
43  
44  
45  
46  
47  
48  
49  
50  
51  
52  
53  
54  
55  
56  
57  
58  
59  
60

For peer review only



## 1.3.8 Question 1: ordinal - Sleeping habits

| fct                     | term               | estimate | std.error | statistic | coef.type   |
|-------------------------|--------------------|----------|-----------|-----------|-------------|
| age                     | 41-60              | -0.74    | 0.03      | -28.81    | coefficient |
|                         | <= 40              | -1.14    | 0.03      | -33.41    | coefficient |
|                         | Very strong Strong | -1.07    | 0.02      | -56.79    | scale       |
|                         | Strong Moderate    | 1.35     | 0.02      | 67.92     | scale       |
|                         | Moderate Weak      | 3.69     | 0.05      | 77.33     | scale       |
|                         | Weak No influence  | 5.44     | 0.11      | 49.04     | scale       |
| education               | Lower              | 0.15     | 0.02      | 6.24      | coefficient |
|                         | Very strong Strong | -0.53    | 0.01      | -36.39    | scale       |
|                         | Strong Moderate    | 1.79     | 0.02      | 95.26     | scale       |
|                         | Moderate Weak      | 4.11     | 0.05      | 86.58     | scale       |
|                         | Weak No influence  | 5.86     | 0.11      | 52.86     | scale       |
| gender                  | Man                | 0.32     | 0.03      | 12.44     | coefficient |
|                         | Other/Undisclosed  | -0.14    | 0.17      | -0.85     | coefficient |
|                         | Very strong Strong | -0.50    | 0.01      | -34.50    | scale       |
|                         | Strong Moderate    | 1.84     | 0.02      | 97.66     | scale       |
|                         | Moderate Weak      | 4.16     | 0.05      | 87.53     | scale       |
|                         | Weak No influence  | 5.91     | 0.11      | 53.29     | scale       |
| healthcare_experience   | Yes                | -0.27    | 0.02      | -11.54    | coefficient |
|                         | Very strong Strong | -0.69    | 0.02      | -43.78    | scale       |
|                         | Strong Moderate    | 1.64     | 0.02      | 86.84     | scale       |
|                         | Moderate Weak      | 3.97     | 0.05      | 83.53     | scale       |
|                         | Weak No influence  | 5.71     | 0.11      | 51.54     | scale       |
| cognitive_health        | Below average      | -0.13    | 0.05      | -2.56     | coefficient |
|                         | Very strong Strong | -0.59    | 0.01      | -45.60    | scale       |
|                         | Strong Moderate    | 1.73     | 0.02      | 101.12    | scale       |
|                         | Moderate Weak      | 4.05     | 0.05      | 86.56     | scale       |
|                         | Weak No influence  | 5.80     | 0.11      | 52.47     | scale       |
| mental_health           | Below average      | -0.33    | 0.03      | -9.68     | coefficient |
|                         | Very strong Strong | -0.63    | 0.01      | -46.59    | scale       |
|                         | Strong Moderate    | 1.70     | 0.02      | 97.95     | scale       |
|                         | Moderate Weak      | 4.02     | 0.05      | 85.77     | scale       |
|                         | Weak No influence  | 5.77     | 0.11      | 52.17     | scale       |
| illness_experience      | Yes                | -0.11    | 0.02      | -4.68     | coefficient |
|                         | Very strong Strong | -0.63    | 0.02      | -39.62    | scale       |
|                         | Strong Moderate    | 1.70     | 0.02      | 88.30     | scale       |
|                         | Moderate Weak      | 4.02     | 0.05      | 84.40     | scale       |
|                         | Weak No influence  | 5.77     | 0.11      | 51.99     | scale       |
| brain_disease_caregiver | Yes                | 0.10     | 0.02      | 4.43      | coefficient |
|                         | Very strong Strong | -0.53    | 0.02      | -32.47    | scale       |
|                         | Strong Moderate    | 1.79     | 0.02      | 88.46     | scale       |
|                         | Moderate Weak      | 4.11     | 0.05      | 85.51     | scale       |

1  
2  
3  
4  
5  
6  
7  
8  
9  
10  
11  
12  
13  
14  
15  
16  
17  
18  
19  
20  
21  
22  
23  
24  
25  
26  
27  
28  
29  
30  
31  
32  
33  
34  
35  
36  
37  
38  
39  
40  
41  
42  
43  
44  
45  
46  
47  
48  
49  
50  
51  
52  
53  
54  
55  
56  
57  
58  
59  
60

For peer review only

## 1.3.9 Question 1: ordinal - Physical health

| fct                     | term               | estimate | std.error | statistic | coef.type   |
|-------------------------|--------------------|----------|-----------|-----------|-------------|
| age                     | 41-60              | -0.20    | 0.03      | -7.91     | coefficient |
|                         | <= 40              | -0.27    | 0.03      | -8.06     | coefficient |
|                         | Very strong Strong | -0.67    | 0.02      | -37.75    | scale       |
|                         | Strong Moderate    | 1.83     | 0.02      | 84.28     | scale       |
|                         | Moderate Weak      | 4.04     | 0.05      | 80.42     | scale       |
|                         | Weak No influence  | 5.95     | 0.13      | 47.31     | scale       |
| education               | Lower              | 0.31     | 0.03      | 12.46     | coefficient |
|                         | Very strong Strong | -0.46    | 0.01      | -31.42    | scale       |
|                         | Strong Moderate    | 2.05     | 0.02      | 101.07    | scale       |
|                         | Moderate Weak      | 4.26     | 0.05      | 85.72     | scale       |
|                         | Weak No influence  | 6.17     | 0.13      | 49.15     | scale       |
| gender                  | Man                | 0.17     | 0.03      | 6.76      | coefficient |
|                         | Other/Undisclosed  | -0.01    | 0.17      | -0.07     | coefficient |
|                         | Very strong Strong | -0.51    | 0.01      | -35.05    | scale       |
|                         | Strong Moderate    | 1.99     | 0.02      | 100.46    | scale       |
|                         | Moderate Weak      | 4.20     | 0.05      | 84.92     | scale       |
|                         | Weak No influence  | 6.11     | 0.13      | 48.73     | scale       |
| healthcare_experience   | Yes                | -0.33    | 0.02      | -13.88    | coefficient |
|                         | Very strong Strong | -0.69    | 0.02      | -43.32    | scale       |
|                         | Strong Moderate    | 1.82     | 0.02      | 91.10     | scale       |
|                         | Moderate Weak      | 4.03     | 0.05      | 81.55     | scale       |
|                         | Weak No influence  | 5.94     | 0.13      | 47.40     | scale       |
| cognitive_health        | Below average      | 0.41     | 0.05      | 8.22      | coefficient |
|                         | Very strong Strong | -0.53    | 0.01      | -41.47    | scale       |
|                         | Strong Moderate    | 1.97     | 0.02      | 105.97    | scale       |
|                         | Moderate Weak      | 4.18     | 0.05      | 85.31     | scale       |
|                         | Weak No influence  | 6.09     | 0.13      | 48.63     | scale       |
| mental_health           | Below average      | 0.19     | 0.03      | 5.38      | coefficient |
|                         | Very strong Strong | -0.53    | 0.01      | -39.99    | scale       |
|                         | Strong Moderate    | 1.97     | 0.02      | 104.22    | scale       |
|                         | Moderate Weak      | 4.18     | 0.05      | 85.07     | scale       |
|                         | Weak No influence  | 6.09     | 0.13      | 48.59     | scale       |
| illness_experience      | Yes                | 0.13     | 0.02      | 5.53      | coefficient |
|                         | Very strong Strong | -0.50    | 0.02      | -32.13    | scale       |
|                         | Strong Moderate    | 2.00     | 0.02      | 96.25     | scale       |
|                         | Moderate Weak      | 4.20     | 0.05      | 84.34     | scale       |
|                         | Weak No influence  | 6.11     | 0.13      | 48.69     | scale       |
| brain_disease_caregiver | Yes                | -0.12    | 0.02      | -5.03     | coefficient |
|                         | Very strong Strong | -0.61    | 0.02      | -36.60    | scale       |
|                         | Strong Moderate    | 1.89     | 0.02      | 89.99     | scale       |
|                         | Moderate Weak      | 4.10     | 0.05      | 82.10     | scale       |

1  
2  
3  
4  
5  
6  
7  
8  
9  
10  
11  
12  
13  
14  
15  
16  
17  
18  
19  
20  
21  
22  
23  
24  
25  
26  
27  
28  
29  
30  
31  
32  
33  
34  
35  
36  
37  
38  
39  
40  
41  
42  
43  
44  
45  
46  
47  
48  
49  
50  
51  
52  
53  
54  
55  
56  
57  
58  
59  
60

For peer review only

## 1.3.10 Question 1: ordinal - Genetics

| fct                   | term                    | estimate | std.error | statistic | coef.type   |
|-----------------------|-------------------------|----------|-----------|-----------|-------------|
| age                   | 41-60                   | -0.06    | 0.02      | -2.43     | coefficient |
|                       | <= 40                   | 0.26     | 0.03      | 8.02      | coefficient |
|                       | Very strong Strong      | -0.48    | 0.02      | -27.58    | scale       |
|                       | Strong Moderate         | 1.56     | 0.02      | 78.11     | scale       |
|                       | Moderate Weak           | 3.74     | 0.04      | 90.21     | scale       |
|                       | Weak No influence       | 5.52     | 0.10      | 58.01     | scale       |
| education             | Lower                   | 0.04     | 0.02      | 1.68      | coefficient |
|                       | Very strong Strong      | -0.48    | 0.01      | -33.17    | scale       |
|                       | Strong Moderate         | 1.55     | 0.02      | 88.31     | scale       |
|                       | Moderate Weak           | 3.72     | 0.04      | 92.50     | scale       |
|                       | Weak No influence       | 5.50     | 0.09      | 58.18     | scale       |
|                       | Man                     | 0.20     | 0.03      | 8.11      | coefficient |
| gender                | Other/Undisclosed       | 0.72     | 0.17      | 4.28      | coefficient |
|                       | Very strong Strong      | -0.44    | 0.01      | -30.60    | scale       |
|                       | Strong Moderate         | 1.61     | 0.02      | 91.27     | scale       |
|                       | Moderate Weak           | 3.78     | 0.04      | 93.72     | scale       |
|                       | Weak No influence       | 5.56     | 0.09      | 58.73     | scale       |
|                       | Yes                     | -0.08    | 0.02      | -3.46     | coefficient |
| healthcare_experience | Very strong Strong      | -0.53    | 0.02      | -34.26    | scale       |
|                       | Strong Moderate         | 1.51     | 0.02      | 83.44     | scale       |
|                       | Moderate Weak           | 3.68     | 0.04      | 90.99     | scale       |
|                       | Weak No influence       | 5.46     | 0.09      | 57.67     | scale       |
|                       | Below average           | 0.07     | 0.05      | 1.43      | coefficient |
|                       | Very strong Strong      | -0.49    | 0.01      | -38.60    | scale       |
| cognitive_health      | Strong Moderate         | 1.55     | 0.02      | 96.07     | scale       |
|                       | Moderate Weak           | 3.71     | 0.04      | 93.77     | scale       |
|                       | Weak No influence       | 5.49     | 0.09      | 58.25     | scale       |
|                       | Below average           | -0.07    | 0.03      | -1.98     | coefficient |
|                       | Very strong Strong      | -0.50    | 0.01      | -38.23    | scale       |
|                       | Strong Moderate         | 1.53     | 0.02      | 93.54     | scale       |
| mental_health         | Moderate Weak           | 3.70     | 0.04      | 93.19     | scale       |
|                       | Weak No influence       | 5.48     | 0.09      | 58.09     | scale       |
|                       | Yes                     | -0.06    | 0.02      | -2.63     | coefficient |
|                       | Very strong Strong      | -0.52    | 0.02      | -33.45    | scale       |
|                       | Strong Moderate         | 1.52     | 0.02      | 83.06     | scale       |
|                       | Moderate Weak           | 3.69     | 0.04      | 90.97     | scale       |
| illness_experience    | Weak No influence       | 5.47     | 0.09      | 57.72     | scale       |
|                       | Yes                     | -0.33    | 0.02      | -14.68    | coefficient |
|                       | Very strong Strong      | -0.66    | 0.02      | -39.48    | scale       |
|                       | Strong Moderate         | 1.39     | 0.02      | 74.82     | scale       |
|                       | Moderate Weak           | 3.57     | 0.04      | 87.86     | scale       |
|                       | brain_disease_caregiver |          |           |           |             |

1  
2  
3  
4  
5  
6  
7  
8  
9  
10  
11  
12  
13  
14  
15  
16  
17  
18  
19  
20  
21  
22  
23  
24  
25  
26  
27  
28  
29  
30  
31  
32  
33  
34  
35  
36  
37  
38  
39  
40  
41  
42  
43  
44  
45  
46  
47  
48  
49  
50  
51  
52  
53  
54  
55  
56  
57  
58  
59  
60

For peer review only

## 1.3.11 Question 1: ordinal - Substance use

| fct                     | term               | estimate | std.error | statistic | coef.type   |
|-------------------------|--------------------|----------|-----------|-----------|-------------|
| age                     | 41-60              | -0.39    | 0.03      | -14.67    | coefficient |
|                         | <= 40              | -0.34    | 0.04      | -9.72     | coefficient |
|                         | Very strong Strong | 0.24     | 0.02      | 13.80     | scale       |
|                         | Strong Moderate    | 2.30     | 0.03      | 90.13     | scale       |
|                         | Moderate Weak      | 3.83     | 0.05      | 81.10     | scale       |
|                         | Weak No influence  | 4.46     | 0.06      | 70.54     | scale       |
| education               | Lower              | 0.09     | 0.03      | 3.35      | coefficient |
|                         | Very strong Strong | 0.47     | 0.01      | 31.82     | scale       |
|                         | Strong Moderate    | 2.52     | 0.02      | 104.15    | scale       |
|                         | Moderate Weak      | 4.05     | 0.05      | 86.84     | scale       |
|                         | Weak No influence  | 4.68     | 0.06      | 74.48     | scale       |
| gender                  | Man                | 0.29     | 0.03      | 10.73     | coefficient |
|                         | Other/Undisclosed  | 0.43     | 0.18      | 2.47      | coefficient |
|                         | Very strong Strong | 0.53     | 0.01      | 35.98     | scale       |
|                         | Strong Moderate    | 2.58     | 0.02      | 106.26    | scale       |
|                         | Moderate Weak      | 4.11     | 0.05      | 88.06     | scale       |
|                         | Weak No influence  | 4.74     | 0.06      | 75.43     | scale       |
| healthcare_experience   | Yes                | -0.28    | 0.03      | -10.92    | coefficient |
|                         | Very strong Strong | 0.34     | 0.02      | 21.93     | scale       |
|                         | Strong Moderate    | 2.39     | 0.02      | 98.36     | scale       |
|                         | Moderate Weak      | 3.92     | 0.05      | 84.11     | scale       |
|                         | Weak No influence  | 4.55     | 0.06      | 72.47     | scale       |
| cognitive_health        | Below average      | 0.37     | 0.05      | 7.45      | coefficient |
|                         | Very strong Strong | 0.47     | 0.01      | 36.63     | scale       |
|                         | Strong Moderate    | 2.52     | 0.02      | 109.46    | scale       |
|                         | Moderate Weak      | 4.05     | 0.05      | 87.95     | scale       |
|                         | Weak No influence  | 4.67     | 0.06      | 75.00     | scale       |
| mental_health           | Below average      | 0.07     | 0.04      | 1.99      | coefficient |
|                         | Very strong Strong | 0.45     | 0.01      | 34.30     | scale       |
|                         | Strong Moderate    | 2.50     | 0.02      | 107.73    | scale       |
|                         | Moderate Weak      | 4.03     | 0.05      | 87.40     | scale       |
|                         | Weak No influence  | 4.66     | 0.06      | 74.64     | scale       |
| illness_experience      | Yes                | 0.09     | 0.02      | 3.69      | coefficient |
|                         | Very strong Strong | 0.48     | 0.02      | 30.25     | scale       |
|                         | Strong Moderate    | 2.53     | 0.02      | 101.57    | scale       |
|                         | Moderate Weak      | 4.06     | 0.05      | 86.36     | scale       |
|                         | Weak No influence  | 4.68     | 0.06      | 74.31     | scale       |
| brain_disease_caregiver | Yes                | 0.00     | 0.02      | 0.08      | coefficient |
|                         | Very strong Strong | 0.45     | 0.02      | 26.55     | scale       |
|                         | Strong Moderate    | 2.49     | 0.03      | 98.15     | scale       |
|                         | Moderate Weak      | 4.02     | 0.05      | 85.15     | scale       |

1  
2  
3  
4  
5  
6  
7  
8  
9  
10  
11  
12  
13  
14  
15  
16  
17  
18  
19  
20  
21  
22  
23  
24  
25  
26  
27  
28  
29  
30  
31  
32  
33  
34  
35  
36  
37  
38  
39  
40  
41  
42  
43  
44  
45  
46  
47  
48  
49  
50  
51  
52  
53  
54  
55  
56  
57  
58  
59  
60

1.4 bin\_vs\_cont

For peer review only



## 1.4.1 Question 1: bin\_vs\_cont - Income

| fct                          | term                  | log_odds | std.error | statistic | p.value | cont_term         | con |
|------------------------------|-----------------------|----------|-----------|-----------|---------|-------------------|-----|
| age                          | 41-60                 | -0.02    | 0.03      | -0.87     | 0.38    | 41-60             |     |
|                              | <= 40                 | -0.21    | 0.04      | -5.81     | 0.00    | <= 40             |     |
| education                    | Lower                 | 0.10     | 0.03      | 3.86      | 0.00    | Lower             |     |
|                              | Man                   | -0.05    | 0.03      | -1.88     | 0.06    | Man               |     |
| gender                       | Other/Undisclosed     | 0.17     | 0.18      | 0.93      | 0.35    | Other/Undisclosed |     |
|                              | healthcare_experience | Yes      | 0.27      | 0.03      | 10.31   | 0.00              | Yes |
| illness_experience           | Yes                   | 0.14     | 0.03      | 5.57      | 0.00    | Yes               |     |
| brain_disease_caregiver      | Yes                   | 0.04     | 0.03      | 1.58      | 0.11    | Yes               |     |
| brain_research_participation | Yes                   | 0.05     | 0.03      | 2.11      | 0.03    | Yes               |     |

## 1.4.2 Question 1: bin\_vs\_cont - Profession

| fct                          | term              | log_odds | std.error | statistic | p.value | cont_term         | con |
|------------------------------|-------------------|----------|-----------|-----------|---------|-------------------|-----|
|                              | 41-60             | 0.15     | 0.03      | 5.61      | 0.00    | 41-60             |     |
| age                          | <= 40             | 0.29     | 0.04      | 8.08      | 0.00    | <= 40             |     |
| education                    | Lower             | -0.28    | 0.03      | -10.78    | 0.00    | Lower             |     |
|                              | Man               | 0.17     | 0.03      | 6.11      | 0.00    | Man               |     |
| gender                       | Other/Undisclosed | -0.01    | 0.18      | -0.07     | 0.95    | Other/Undisclosed |     |
| healthcare_experience        | Yes               | 0.20     | 0.03      | 8.10      | 0.00    | Yes               |     |
| cognitive_health             | Below average     | -0.20    | 0.05      | -3.92     | 0.00    | Below average     |     |
| mental_health                | Below average     | -0.13    | 0.04      | -3.69     | 0.00    | Below average     |     |
| illness_experience           | Yes               | -0.06    | 0.02      | -2.38     | 0.02    | Yes               |     |
| brain_disease_caregiver      | Yes               | -0.12    | 0.02      | -4.94     | 0.00    | Yes               |     |
| brain_research_participation | Yes               | -0.14    | 0.02      | -5.77     | 0.00    | Yes               |     |
| relationship                 | Stable            | -0.02    | 0.02      | -0.86     | 0.39    | Stable            |     |

## 1.4.3 Question 1: bin\_vs\_cont - Education

| fct                          | term              | log_odds | std.error | statistic | p.value | cont_term         | con |
|------------------------------|-------------------|----------|-----------|-----------|---------|-------------------|-----|
|                              | 41-60             | -0.07    | 0.03      | -2.57     | 0.01    | 41-60             |     |
| age                          | <= 40             | 0.11     | 0.04      | 2.97      | 0.00    | <= 40             |     |
| education                    | Lower             | -0.48    | 0.03      | -18.32    | 0.00    | Lower             |     |
|                              | Man               | 0.12     | 0.03      | 4.40      | 0.00    | Man               |     |
| gender                       | Other/Undisclosed | 0.20     | 0.19      | 1.09      | 0.28    | Other/Undisclosed |     |
| healthcare_experience        | Yes               | 0.29     | 0.03      | 11.23     | 0.00    | Yes               |     |
| cognitive_health             | Below average     | -0.39    | 0.05      | -7.57     | 0.00    | Below average     |     |
| mental_health                | Below average     | -0.33    | 0.04      | -9.05     | 0.00    | Below average     |     |
| illness_experience           | Yes               | -0.10    | 0.03      | -4.03     | 0.00    | Yes               |     |
| brain_disease_caregiver      | Yes               | -0.08    | 0.02      | -3.40     | 0.00    | Yes               |     |
| brain_research_participation | Yes               | -0.02    | 0.02      | -0.61     | 0.54    | Yes               |     |

## 1.4.4 Question 1: bin\_vs\_cont - Diet

| fct                          | term          | log_odds | std.error | statistic | p.value | cont_term     | cont_beta |
|------------------------------|---------------|----------|-----------|-----------|---------|---------------|-----------|
| age                          | 41-60         | 0.43     | 0.03      | 14.59     | 0.00    | 41-60         | -0.19     |
|                              | <= 40         | 0.47     | 0.04      | 11.71     | 0.00    | <= 40         | -0.24     |
| education                    | Lower         | -0.24    | 0.03      | -8.44     | 0.00    | Lower         | 0.12      |
| gender                       | Man           | -0.36    | 0.03      | -12.40    | 0.00    | Man           | 0.14      |
| healthcare_experience        | Yes           | 0.33     | 0.03      | 11.70     | 0.00    | Yes           | -0.14     |
| cognitive_health             | Below average | -0.46    | 0.05      | -8.67     | 0.00    | Below average | 0.18      |
| mental_health                | Below average | -0.26    | 0.04      | -6.77     | 0.00    | Below average | 0.09      |
| illness_experience           | Yes           | -0.13    | 0.03      | -4.76     | 0.00    | Yes           | 0.05      |
| brain_disease_caregiver      | Yes           | 0.17     | 0.03      | 6.29      | 0.00    | Yes           | -0.07     |
| brain_research_participation | Yes           | 0.04     | 0.03      | 1.59      | 0.11    | Yes           | -0.02     |
| relationship                 | Stable        | -0.04    | 0.03      | -1.41     | 0.16    | Stable        | 0.03      |

## 1.4.5 Question 1: bin\_vs\_cont - Physical environment

| fct                          | term              | log_odds | std.error | statistic | p.value | cont_term         | con |
|------------------------------|-------------------|----------|-----------|-----------|---------|-------------------|-----|
| age                          | 41-60             | 0.23     | 0.03      | 7.59      | 0.00    | 41-60             |     |
|                              | <= 40             | 0.09     | 0.04      | 2.42      | 0.02    | <= 40             |     |
| education                    | Lower             | 0.06     | 0.03      | 1.90      | 0.06    | Lower             |     |
| gender                       | Man               | -0.15    | 0.03      | -5.16     | 0.00    | Man               |     |
|                              | Other/Undisclosed | 0.27     | 0.21      | 1.27      | 0.20    | Other/Undisclosed |     |
| healthcare_experience        | Yes               | 0.17     | 0.03      | 6.27      | 0.00    | Yes               |     |
| cognitive_health             | Below average     | -0.23    | 0.05      | -4.22     | 0.00    | Below average     |     |
| mental_health                | Below average     | -0.09    | 0.04      | -2.29     | 0.02    | Below average     |     |
| illness_experience           | Yes               | 0.13     | 0.03      | 4.88      | 0.00    | Yes               |     |
| brain_disease_caregiver      | Yes               | 0.03     | 0.03      | 1.25      | 0.21    | Yes               |     |
| brain_research_participation | Yes               | 0.02     | 0.03      | 0.65      | 0.52    | Yes               |     |
| relationship                 | Stable            | -0.07    | 0.03      | -2.46     | 0.01    | Stable            |     |

## 1.4.6 Question 1: bin\_vs\_cont - Life goals

| fct                          | term              | log_odds | std.error | statistic | p.value | cont_term         | con |
|------------------------------|-------------------|----------|-----------|-----------|---------|-------------------|-----|
| age                          | <= 40             | -0.34    | 0.04      | -9.10     | 0.00    | <= 40             |     |
| education                    | Lower             | -0.06    | 0.03      | -2.21     | 0.03    | Lower             |     |
| gender                       | Man               | -0.12    | 0.03      | -4.00     | 0.00    | Man               |     |
|                              | Other/Undisclosed | -0.13    | 0.20      | -0.66     | 0.51    | Other/Undisclosed |     |
| healthcare_experience        | Yes               | 0.24     | 0.03      | 8.66      | 0.00    | Yes               |     |
| cognitive_health             | Below average     | -0.10    | 0.06      | -1.75     | 0.08    | Below average     |     |
| mental_health                | Below average     | -0.22    | 0.04      | -5.74     | 0.00    | Below average     |     |
| illness_experience           | Yes               | 0.03     | 0.03      | 1.12      | 0.26    | Yes               |     |
| brain_disease_caregiver      | Yes               | -0.04    | 0.03      | -1.44     | 0.15    | Yes               |     |
| brain_research_participation | Yes               | -0.14    | 0.03      | -5.19     | 0.00    | Yes               |     |

## 1.4.7 Question 1: bin\_vs\_cont - Social environment

| fct                          | term              | log_odds | std.error | statistic | p.value | cont_term         | con |
|------------------------------|-------------------|----------|-----------|-----------|---------|-------------------|-----|
| age                          | 41-60             | 0.29     | 0.03      | 8.18      | 0.00    | 41-60             |     |
|                              | <= 40             | 0.55     | 0.05      | 10.93     | 0.00    | <= 40             |     |
| education                    | Lower             | -0.18    | 0.03      | -5.46     | 0.00    | Lower             |     |
| gender                       | Man               | -0.32    | 0.03      | -9.48     | 0.00    | Man               |     |
|                              | Other/Undisclosed | 0.58     | 0.30      | 1.91      | 0.06    | Other/Undisclosed |     |
| healthcare_experience        | Yes               | 0.39     | 0.03      | 11.55     | 0.00    | Yes               |     |
| cognitive_health             | Below average     | -0.41    | 0.06      | -6.76     | 0.00    | Below average     |     |
| mental_health                | Below average     | 0.03     | 0.05      | 0.62      | 0.53    | Below average     |     |
| illness_experience           | Yes               | -0.05    | 0.03      | -1.55     | 0.12    | Yes               |     |
| brain_disease_caregiver      | Yes               | 0.04     | 0.03      | 1.41      | 0.16    | Yes               |     |
| brain_research_participation | Yes               | -0.07    | 0.03      | -2.32     | 0.02    | Yes               |     |
| relationship                 | Stable            | -0.03    | 0.03      | -0.86     | 0.39    | Stable            |     |

## 1.4.8 Question 1: bin\_vs\_cont - Sleeping habits

| fct                          | term              | log_odds | std.error | statistic | p.value | cont_term         | con |
|------------------------------|-------------------|----------|-----------|-----------|---------|-------------------|-----|
| age                          | 41-60             | 0.72     | 0.04      | 18.89     | 0.00    | 41-60             |     |
|                              | <= 40             | 1.02     | 0.06      | 17.61     | 0.00    | <= 40             |     |
| education                    | Lower             | -0.18    | 0.04      | -5.11     | 0.00    | Lower             |     |
|                              | Man               | -0.39    | 0.04      | -10.87    | 0.00    | Man               |     |
| gender                       | Other/Undisclosed | 0.08     | 0.27      | 0.29      | 0.78    | Other/Undisclosed |     |
|                              | Yes               | 0.30     | 0.04      | 8.36      | 0.00    | Yes               |     |
| healthcare_experience        | Yes               | 0.30     | 0.04      | 8.36      | 0.00    | Yes               |     |
| mental_health                | Below average     | 0.29     | 0.05      | 5.28      | 0.00    | Below average     |     |
| illness_experience           | Yes               | 0.12     | 0.03      | 3.39      | 0.00    | Yes               |     |
| brain_disease_caregiver      | Yes               | -0.06    | 0.03      | -1.68     | 0.09    | Yes               |     |
| brain_research_participation | Yes               | -0.34    | 0.03      | -10.04    | 0.00    | Yes               |     |
| relationship                 | Stable            | -0.21    | 0.03      | -6.01     | 0.00    | Stable            |     |



## 1.4.9 Question 1: bin\_vs\_cont - Physical health

| fct                          | term              | log_odds | std.error | statistic | p.value | cont_term         | con |
|------------------------------|-------------------|----------|-----------|-----------|---------|-------------------|-----|
| age                          | 41-60             | 0.13     | 0.04      | 3.28      | 0.00    | 41-60             |     |
|                              | <= 40             | 0.16     | 0.05      | 2.97      | 0.00    | <= 40             |     |
| education                    | Lower             | -0.31    | 0.04      | -8.30     | 0.00    | Lower             |     |
|                              | Man               | -0.26    | 0.04      | -6.75     | 0.00    | Man               |     |
| gender                       | Other/Undisclosed | -0.29    | 0.25      | -1.14     | 0.25    | Other/Undisclosed |     |
|                              | Yes               | 0.43     | 0.04      | 10.86     | 0.00    | Yes               |     |
| healthcare_experience        | Yes               | 0.43     | 0.04      | 10.86     | 0.00    | Yes               |     |
| cognitive_health             | Below average     | -0.58    | 0.06      | -8.95     | 0.00    | Below average     |     |
| mental_health                | Below average     | -0.29    | 0.05      | -5.84     | 0.00    | Below average     |     |
| illness_experience           | Yes               | -0.19    | 0.04      | -5.27     | 0.00    | Yes               |     |
| brain_disease_caregiver      | Yes               | 0.10     | 0.04      | 2.75      | 0.01    | Yes               |     |
| brain_research_participation | Yes               | 0.05     | 0.04      | 1.46      | 0.14    | Yes               |     |
| relationship                 | Stable            | 0.07     | 0.04      | 1.84      | 0.07    | Stable            |     |

## 1.4.10 Question 1: bin\_vs\_cont - Genetics

| fct                          | term              | log_odds | std.error | statistic | p.value | cont_term         | con |
|------------------------------|-------------------|----------|-----------|-----------|---------|-------------------|-----|
|                              | 41-60             | 0.01     | 0.04      | 0.27      | 0.79    | 41-60             |     |
| age                          | <= 40             | -0.43    | 0.04      | -10.19    | 0.00    | <= 40             |     |
| education                    | Lower             | -0.06    | 0.03      | -1.67     | 0.09    | Lower             |     |
|                              | Man               | -0.23    | 0.03      | -6.74     | 0.00    | Man               |     |
| gender                       | Other/Undisclosed | -0.77    | 0.20      | -3.97     | 0.00    | Other/Undisclosed |     |
| healthcare_experience        | Yes               | 0.12     | 0.03      | 3.52      | 0.00    | Yes               |     |
| cognitive_health             | Below average     | -0.19    | 0.06      | -2.94     | 0.00    | Below average     |     |
| mental_health                | Below average     | 0.01     | 0.05      | 0.27      | 0.79    | Below average     |     |
| illness_experience           | Yes               | 0.06     | 0.03      | 1.74      | 0.08    | Yes               |     |
| brain_disease_caregiver      | Yes               | 0.39     | 0.03      | 12.18     | 0.00    | Yes               |     |
| brain_research_participation | Yes               | 0.22     | 0.03      | 6.69      | 0.00    | Yes               |     |
| relationship                 | Stable            | 0.18     | 0.03      | 5.83      | 0.00    | Stable            |     |

## 1.4.11 Question 1: bin\_vs\_cont - Substance use

| fct                     | term              | log_odds | std.error | statistic | p.value | cont_term         | cont_beta |
|-------------------------|-------------------|----------|-----------|-----------|---------|-------------------|-----------|
| age                     | 41-60             | 0.53     | 0.05      | 10.25     | 0.00    | 41-60             | -0.1      |
|                         | <= 40             | 0.36     | 0.07      | 5.35      | 0.00    | <= 40             | -0.1      |
| education               | Lower             | -0.28    | 0.05      | -6.03     | 0.00    | Lower             | 0.0       |
|                         | Man               | -0.42    | 0.05      | -8.88     | 0.00    | Man               | 0.1       |
| gender                  | Other/Undisclosed | -0.83    | 0.26      | -3.24     | 0.00    | Other/Undisclosed | 0.1       |
|                         | Yes               | 0.41     | 0.05      | 8.25      | 0.00    | Yes               | -0.1      |
| healthcare_experience   | Yes               | 0.41     | 0.05      | 8.25      | 0.00    | Yes               | -0.1      |
| cognitive_health        | Below average     | -0.63    | 0.08      | -8.13     | 0.00    | Below average     | 0.1       |
| mental_health           | Below average     | -0.13    | 0.06      | -1.95     | 0.05    | Below average     | 0.0       |
| illness_experience      | Yes               | -0.21    | 0.05      | -4.59     | 0.00    | Yes               | 0.0       |
| brain_disease_caregiver | Yes               | 0.12     | 0.05      | 2.66      | 0.01    | Yes               | -0.0      |
| relationship            | Stable            | 0.08     | 0.05      | 1.78      | 0.08    | Stable            | -0.0      |

[[1]] [[1]][[1]] NULL

[[1]][[2]] NULL

[[1]][[3]] NULL

[[1]][[4]] NULL

[[1]][[5]] NULL

[[1]][[6]] NULL

[[1]][[7]] NULL

[[1]][[8]] NULL

[[1]][[9]] NULL

[[1]][[10]] NULL

[[1]][[11]] NULL

[[2]] [[2]][[1]] NULL

[[2]][[2]] NULL

[[2]][[3]] NULL

[[2]][[4]] NULL

[[2]][[5]] NULL

[[2]][[6]] NULL

[[2]][[7]] NULL

[[2]][[8]] NULL

[[2]][[9]] NULL

[[2]][[10]] NULL

[[2]][[11]] NULL

1  
2  
3           [[3]] [[3]][[1]] NULL  
4  
5           [[3]][[2]] NULL  
6  
7           [[3]][[3]] NULL  
8  
9           [[3]][[4]] NULL  
10  
11           [[3]][[5]] NULL  
12  
13           [[3]][[6]] NULL  
14  
15           [[3]][[7]] NULL  
16  
17           [[3]][[8]] NULL  
18  
19           [[3]][[9]] NULL  
20  
21           [[3]][[10]] NULL  
22  
23           [[3]][[11]] NULL  
24  
25           [[4]] [[4]][[1]] NULL  
26  
27           [[4]][[2]] NULL  
28  
29           [[4]][[3]] NULL  
30  
31           [[4]][[4]] NULL  
32  
33           [[4]][[5]] NULL  
34  
35           [[4]][[6]] NULL  
36  
37           [[4]][[7]] NULL  
38  
39           [[4]][[8]] NULL  
40  
41           [[4]][[9]] NULL  
42  
43           [[4]][[10]] NULL  
44  
45           [[4]][[11]] NULL  
46  
47  
48  
49  
50  
51  
52  
53  
54  
55  
56  
57  
58  
59  
60

For peer review only

1  
2  
3 **2 Question 2**  
4

5 **2.1 continuous**  
6  
7  
8  
9  
10  
11  
12  
13  
14  
15  
16  
17  
18  
19  
20  
21  
22  
23  
24  
25  
26  
27  
28  
29  
30  
31  
32  
33  
34  
35  
36  
37  
38  
39  
40  
41  
42  
43  
44  
45  
46  
47  
48  
49  
50  
51  
52  
53  
54  
55  
56  
57  
58  
59  
60

For peer review only

## 2.1.1 Question 2: continuous - In the womb

| fct                          | term              | estimate | std.error | statistic | p.value |
|------------------------------|-------------------|----------|-----------|-----------|---------|
|                              | (Intercept)       | 1.75     | 0.01      | 229.55    | 0.00    |
| age                          | 41-60             | -0.17    | 0.01      | -14.54    | 0.00    |
|                              | <= 40             | -0.18    | 0.01      | -12.24    | 0.00    |
| education                    | (Intercept)       | 1.59     | 0.01      | 255.60    | 0.00    |
|                              | Lower             | 0.22     | 0.01      | 19.76     | 0.00    |
| gender                       | (Intercept)       | 1.60     | 0.01      | 261.42    | 0.00    |
|                              | Man               | 0.22     | 0.01      | 18.76     | 0.00    |
|                              | Other/Undisclosed | -0.03    | 0.08      | -0.33     | 0.74    |
| healthcare_experience        | (Intercept)       | 1.75     | 0.01      | 266.42    | 0.00    |
|                              | Yes               | -0.24    | 0.01      | -22.48    | 0.00    |
| cognitive_health             | (Intercept)       | 1.65     | 0.01      | 307.82    | 0.00    |
|                              | Below average     | 0.20     | 0.02      | 9.35      | 0.00    |
| mental_health                | (Intercept)       | 1.66     | 0.01      | 297.07    | 0.00    |
|                              | Below average     | 0.02     | 0.02      | 1.30      | 0.19    |
| illness_experience           | (Intercept)       | 1.66     | 0.01      | 246.58    | 0.00    |
|                              | Yes               | 0.00     | 0.01      | 0.20      | 0.84    |
| brain_disease_caregiver      | (Intercept)       | 1.70     | 0.01      | 238.94    | 0.00    |
|                              | Yes               | -0.08    | 0.01      | -7.59     | 0.00    |
| brain_research_participation | (Intercept)       | 1.66     | 0.01      | 240.93    | 0.00    |
|                              | Yes               | 0.00     | 0.01      | -0.42     | 0.67    |
| relationship                 | (Intercept)       | 1.67     | 0.01      | 213.16    | 0.00    |
|                              | Stable            | -0.01    | 0.01      | -1.40     | 0.16    |

## 2.1.2 Question 2: continuous - Childhood

| fct                          | term              | estimate | std.error | statistic | p.value |
|------------------------------|-------------------|----------|-----------|-----------|---------|
|                              | (Intercept)       | 1.41     | 0.01      | 270.16    | 0.00    |
| age                          | 41-60             | -0.12    | 0.01      | -15.09    | 0.00    |
|                              | <= 40             | -0.18    | 0.01      | -17.75    | 0.00    |
| education                    | (Intercept)       | 1.30     | 0.00      | 303.30    | 0.00    |
|                              | Lower             | 0.11     | 0.01      | 14.84     | 0.00    |
| gender                       | (Intercept)       | 1.31     | 0.00      | 310.74    | 0.00    |
|                              | Man               | 0.09     | 0.01      | 11.39     | 0.00    |
|                              | Other/Undisclosed | -0.04    | 0.05      | -0.80     | 0.42    |
| healthcare_experience        | (Intercept)       | 1.38     | 0.00      | 304.28    | 0.00    |
|                              | Yes               | -0.11    | 0.01      | -15.41    | 0.00    |
| cognitive_health             | (Intercept)       | 1.33     | 0.00      | 361.51    | 0.00    |
|                              | Below average     | 0.12     | 0.02      | 7.83      | 0.00    |
| mental_health                | (Intercept)       | 1.34     | 0.00      | 349.73    | 0.00    |
|                              | Below average     | -0.02    | 0.01      | -2.17     | 0.03    |
| illness_experience           | (Intercept)       | 1.34     | 0.00      | 288.97    | 0.00    |
|                              | Yes               | 0.00     | 0.01      | 0.36      | 0.72    |
| brain_disease_caregiver      | (Intercept)       | 1.34     | 0.00      | 273.60    | 0.00    |
|                              | Yes               | 0.00     | 0.01      | 0.41      | 0.68    |
| brain_research_participation | (Intercept)       | 1.33     | 0.00      | 280.49    | 0.00    |
|                              | Yes               | 0.02     | 0.01      | 2.64      | 0.01    |
| relationship                 | (Intercept)       | 1.33     | 0.01      | 246.94    | 0.00    |
|                              | Stable            | 0.02     | 0.01      | 2.31      | 0.02    |

## 2.1.3 Question 2: continuous - Adolescence

| fct                          | term              | estimate | std.error | statistic | p.value |
|------------------------------|-------------------|----------|-----------|-----------|---------|
|                              | (Intercept)       | 1.40     | 0.00      | 287.36    | 0.00    |
| age                          | 41-60             | -0.10    | 0.01      | -13.91    | 0.00    |
|                              | <= 40             | -0.16    | 0.01      | -16.49    | 0.00    |
| education                    | (Intercept)       | 1.32     | 0.00      | 328.12    | 0.00    |
|                              | Lower             | 0.06     | 0.01      | 9.00      | 0.00    |
| gender                       | (Intercept)       | 1.31     | 0.00      | 333.19    | 0.00    |
|                              | Man               | 0.09     | 0.01      | 12.11     | 0.00    |
|                              | Other/Undisclosed | -0.05    | 0.05      | -0.94     | 0.35    |
| healthcare_experience        | (Intercept)       | 1.37     | 0.00      | 323.83    | 0.00    |
|                              | Yes               | -0.09    | 0.01      | -13.28    | 0.00    |
| cognitive_health             | (Intercept)       | 1.33     | 0.00      | 387.89    | 0.00    |
|                              | Below average     | 0.09     | 0.01      | 6.42      | 0.00    |
| mental_health                | (Intercept)       | 1.34     | 0.00      | 374.89    | 0.00    |
|                              | Below average     | -0.02    | 0.01      | -2.32     | 0.02    |
| illness_experience           | (Intercept)       | 1.34     | 0.00      | 310.78    | 0.00    |
|                              | Yes               | -0.01    | 0.01      | -1.19     | 0.24    |
| brain_disease_caregiver      | (Intercept)       | 1.34     | 0.00      | 294.08    | 0.00    |
|                              | Yes               | 0.00     | 0.01      | -0.66     | 0.51    |
| brain_research_participation | (Intercept)       | 1.34     | 0.00      | 302.59    | 0.00    |
|                              | Yes               | 0.00     | 0.01      | -0.09     | 0.93    |
| relationship                 | (Intercept)       | 1.32     | 0.01      | 263.81    | 0.00    |
|                              | Stable            | 0.03     | 0.01      | 3.75      | 0.00    |



## 2.1.4 Question 2: continuous - Young adulthood

| fct                          | term              | estimate | std.error | statistic | p.value |
|------------------------------|-------------------|----------|-----------|-----------|---------|
|                              | (Intercept)       | 1.49     | 0.01      | 285.79    | 0.00    |
| age                          | 41-60             | -0.07    | 0.01      | -9.61     | 0.00    |
|                              | <= 40             | -0.07    | 0.01      | -7.29     | 0.00    |
| education                    | (Intercept)       | 1.45     | 0.00      | 337.76    | 0.00    |
|                              | Lower             | 0.01     | 0.01      | 1.85      | 0.06    |
| gender                       | (Intercept)       | 1.42     | 0.00      | 337.97    | 0.00    |
|                              | Man               | 0.12     | 0.01      | 15.84     | 0.00    |
|                              | Other/Undisclosed | 0.05     | 0.05      | 1.03      | 0.30    |
| healthcare_experience        | (Intercept)       | 1.49     | 0.00      | 329.23    | 0.00    |
|                              | Yes               | -0.09    | 0.01      | -12.85    | 0.00    |
| cognitive_health             | (Intercept)       | 1.45     | 0.00      | 395.48    | 0.00    |
|                              | Below average     | 0.05     | 0.01      | 3.67      | 0.00    |
| mental_health                | (Intercept)       | 1.45     | 0.00      | 380.63    | 0.00    |
|                              | Below average     | 0.01     | 0.01      | 0.63      | 0.53    |
| illness_experience           | (Intercept)       | 1.47     | 0.00      | 318.65    | 0.00    |
|                              | Yes               | -0.03    | 0.01      | -4.43     | 0.00    |
| brain_disease_caregiver      | (Intercept)       | 1.48     | 0.00      | 304.26    | 0.00    |
|                              | Yes               | -0.05    | 0.01      | -7.39     | 0.00    |
| brain_research_participation | (Intercept)       | 1.46     | 0.00      | 309.76    | 0.00    |
|                              | Yes               | -0.02    | 0.01      | -2.78     | 0.01    |
| relationship                 | (Intercept)       | 1.45     | 0.01      | 270.97    | 0.00    |
|                              | Stable            | 0.00     | 0.01      | 0.67      | 0.51    |

## 2.1.5 Question 2: continuous - Middle age

| fct                          | term              | estimate | std.error | statistic | p.value |
|------------------------------|-------------------|----------|-----------|-----------|---------|
|                              | (Intercept)       | 1.44     | 0.01      | 282.09    | 0.00    |
| age                          | 41-60             | -0.10    | 0.01      | -12.88    | 0.00    |
|                              | <= 40             | 0.01     | 0.01      | 0.84      | 0.40    |
| education                    | (Intercept)       | 1.40     | 0.00      | 333.55    | 0.00    |
|                              | Lower             | 0.01     | 0.01      | 1.73      | 0.08    |
| gender                       | (Intercept)       | 1.35     | 0.00      | 332.02    | 0.00    |
|                              | Man               | 0.16     | 0.01      | 20.93     | 0.00    |
|                              | Other/Undisclosed | 0.17     | 0.05      | 3.23      | 0.00    |
| healthcare_experience        | (Intercept)       | 1.43     | 0.00      | 322.53    | 0.00    |
|                              | Yes               | -0.07    | 0.01      | -9.33     | 0.00    |
| cognitive_health             | (Intercept)       | 1.40     | 0.00      | 390.51    | 0.00    |
|                              | Below average     | 0.05     | 0.01      | 3.65      | 0.00    |
| mental_health                | (Intercept)       | 1.40     | 0.00      | 375.23    | 0.00    |
|                              | Below average     | 0.02     | 0.01      | 2.40      | 0.02    |
| illness_experience           | (Intercept)       | 1.41     | 0.00      | 313.33    | 0.00    |
|                              | Yes               | -0.02    | 0.01      | -2.48     | 0.01    |
| brain_disease_caregiver      | (Intercept)       | 1.44     | 0.00      | 304.92    | 0.00    |
|                              | Yes               | -0.09    | 0.01      | -13.03    | 0.00    |
| brain_research_participation | (Intercept)       | 1.41     | 0.00      | 306.87    | 0.00    |
|                              | Yes               | -0.03    | 0.01      | -4.17     | 0.00    |
| relationship                 | (Intercept)       | 1.41     | 0.01      | 269.94    | 0.00    |
|                              | Stable            | -0.02    | 0.01      | -2.54     | 0.01    |

### 2.1.6 Question 2: continuous - Old age

| fct                          | term              | estimate | std.error | statistic | p.value |
|------------------------------|-------------------|----------|-----------|-----------|---------|
|                              | (Intercept)       | 1.31     | 0.00      | 263.47    | 0.00    |
| age                          | 41-60             | -0.01    | 0.01      | -1.40     | 0.16    |
|                              | <= 40             | 0.09     | 0.01      | 9.28      | 0.00    |
| education                    | (Intercept)       | 1.30     | 0.00      | 320.45    | 0.00    |
|                              | Lower             | 0.04     | 0.01      | 5.44      | 0.00    |
| gender                       | (Intercept)       | 1.28     | 0.00      | 322.08    | 0.00    |
|                              | Man               | 0.12     | 0.01      | 16.04     | 0.00    |
|                              | Other/Undisclosed | 0.17     | 0.05      | 3.32      | 0.00    |
| healthcare_experience        | (Intercept)       | 1.33     | 0.00      | 309.41    | 0.00    |
|                              | Yes               | -0.04    | 0.01      | -5.57     | 0.00    |
| cognitive_health             | (Intercept)       | 1.31     | 0.00      | 377.50    | 0.00    |
|                              | Below average     | 0.05     | 0.01      | 3.63      | 0.00    |
| mental_health                | (Intercept)       | 1.31     | 0.00      | 362.16    | 0.00    |
|                              | Below average     | 0.04     | 0.01      | 4.24      | 0.00    |
| illness_experience           | (Intercept)       | 1.32     | 0.00      | 302.45    | 0.00    |
|                              | Yes               | -0.01    | 0.01      | -1.63     | 0.10    |
| brain_disease_caregiver      | (Intercept)       | 1.35     | 0.00      | 292.30    | 0.00    |
|                              | Yes               | -0.06    | 0.01      | -9.54     | 0.00    |
| brain_research_participation | (Intercept)       | 1.34     | 0.00      | 298.67    | 0.00    |
|                              | Yes               | -0.05    | 0.01      | -6.83     | 0.00    |
| relationship                 | (Intercept)       | 1.33     | 0.01      | 261.80    | 0.00    |
|                              | Stable            | -0.02    | 0.01      | -3.53     | 0.00    |

## 2.2 binary

## 2.2.1 Question 2: binary - In the womb

| fct                          | term              | estimate | std.error | statistic | p.value |
|------------------------------|-------------------|----------|-----------|-----------|---------|
|                              | (Intercept)       | 1.43     | 0.02      | 63.24     | 0.00    |
| age                          | 41-60             | 0.40     | 0.04      | 10.94     | 0.00    |
|                              | <= 40             | 0.39     | 0.05      | 8.04      | 0.00    |
| education                    | (Intercept)       | 1.82     | 0.02      | 86.26     | 0.00    |
|                              | Lower             | -0.52    | 0.03      | -15.42    | 0.00    |
| gender                       | (Intercept)       | 1.81     | 0.02      | 87.70     | 0.00    |
|                              | Man               | -0.54    | 0.03      | -15.83    | 0.00    |
|                              | Other/Undisclosed | 0.04     | 0.26      | 0.15      | 0.88    |
| healthcare_experience        | (Intercept)       | 1.42     | 0.02      | 72.64     | 0.00    |
|                              | Yes               | 0.65     | 0.04      | 17.78     | 0.00    |
| cognitive_health             | (Intercept)       | 1.67     | 0.02      | 97.64     | 0.00    |
|                              | Below average     | -0.51    | 0.06      | -8.47     | 0.00    |
| mental_health                | (Intercept)       | 1.65     | 0.02      | 93.42     | 0.00    |
|                              | Below average     | -0.14    | 0.05      | -3.00     | 0.00    |
| illness_experience           | (Intercept)       | 1.64     | 0.02      | 77.25     | 0.00    |
|                              | Yes               | -0.02    | 0.03      | -0.65     | 0.52    |
| brain_disease_caregiver      | (Intercept)       | 1.53     | 0.02      | 70.58     | 0.00    |
|                              | Yes               | 0.24     | 0.03      | 7.35      | 0.00    |
| brain_research_participation | (Intercept)       | 1.65     | 0.02      | 75.48     | 0.00    |
|                              | Yes               | -0.03    | 0.03      | -1.05     | 0.29    |
| relationship                 | (Intercept)       | 1.60     | 0.02      | 65.62     | 0.00    |
|                              | Stable            | 0.06     | 0.03      | 1.88      | 0.06    |

## 2.2.2 Question 2: binary - Childhood

| fct                          | term              | estimate | std.error | statistic | p.value |
|------------------------------|-------------------|----------|-----------|-----------|---------|
|                              | (Intercept)       | 2.65     | 0.04      | 73.93     | 0.00    |
| age                          | 41-60             | 0.57     | 0.06      | 9.17      | 0.00    |
|                              | <= 40             | 0.64     | 0.09      | 7.26      | 0.00    |
| education                    | (Intercept)       | 3.13     | 0.04      | 86.00     | 0.00    |
|                              | Lower             | -0.56    | 0.06      | -9.99     | 0.00    |
| gender                       | (Intercept)       | 3.10     | 0.04      | 87.94     | 0.00    |
|                              | Man               | -0.52    | 0.06      | -9.23     | 0.00    |
|                              | Other/Undisclosed | -0.12    | 0.42      | -0.28     | 0.78    |
| healthcare_experience        | (Intercept)       | 2.70     | 0.03      | 85.08     | 0.00    |
|                              | Yes               | 0.72     | 0.06      | 11.26     | 0.00    |
| cognitive_health             | (Intercept)       | 2.97     | 0.03      | 102.68    | 0.00    |
|                              | Below average     | -0.58    | 0.09      | -6.21     | 0.00    |
| mental_health                | (Intercept)       | 2.93     | 0.03      | 99.12     | 0.00    |
|                              | Below average     | -0.04    | 0.08      | -0.46     | 0.65    |
| illness_experience           | (Intercept)       | 2.96     | 0.04      | 81.90     | 0.00    |
|                              | Yes               | -0.08    | 0.06      | -1.48     | 0.14    |
| brain_disease_caregiver      | (Intercept)       | 2.92     | 0.04      | 77.91     | 0.00    |
|                              | Yes               | 0.02     | 0.06      | 0.29      | 0.77    |
| brain_research_participation | (Intercept)       | 2.96     | 0.04      | 79.93     | 0.00    |
|                              | Yes               | -0.07    | 0.06      | -1.31     | 0.19    |
| relationship                 | (Intercept)       | 2.98     | 0.04      | 70.24     | 0.00    |
|                              | Stable            | -0.10    | 0.06      | -1.76     | 0.08    |

## 2.2.3 Question 2: binary - Adolescence

| fct                          | term              | estimate | std.error | statistic | p.value |
|------------------------------|-------------------|----------|-----------|-----------|---------|
|                              | (Intercept)       | 3.06     | 0.04      | 71.14     | 0.00    |
| age                          | 41-60             | 0.54     | 0.07      | 7.18      | 0.00    |
|                              | <= 40             | 0.76     | 0.11      | 6.79      | 0.00    |
| education                    | (Intercept)       | 3.49     | 0.04      | 81.21     | 0.00    |
|                              | Lower             | -0.40    | 0.07      | -5.93     | 0.00    |
| gender                       | (Intercept)       | 3.47     | 0.04      | 82.93     | 0.00    |
|                              | Man               | -0.39    | 0.07      | -5.59     | 0.00    |
|                              | Other/Undisclosed | -0.29    | 0.46      | -0.64     | 0.52    |
| healthcare_experience        | (Intercept)       | 3.15     | 0.04      | 81.08     | 0.00    |
|                              | Yes               | 0.58     | 0.08      | 7.74      | 0.00    |
| cognitive_health             | (Intercept)       | 3.40     | 0.04      | 96.48     | 0.00    |
|                              | Below average     | -0.69    | 0.11      | -6.44     | 0.00    |
| mental_health                | (Intercept)       | 3.36     | 0.04      | 93.38     | 0.00    |
|                              | Below average     | -0.11    | 0.09      | -1.16     | 0.25    |
| illness_experience           | (Intercept)       | 3.35     | 0.04      | 77.56     | 0.00    |
|                              | Yes               | -0.01    | 0.07      | -0.12     | 0.91    |
| brain_disease_caregiver      | (Intercept)       | 3.34     | 0.05      | 73.49     | 0.00    |
|                              | Yes               | 0.00     | 0.07      | -0.02     | 0.98    |
| brain_research_participation | (Intercept)       | 3.36     | 0.04      | 75.48     | 0.00    |
|                              | Yes               | -0.05    | 0.07      | -0.68     | 0.50    |
| relationship                 | (Intercept)       | 3.42     | 0.05      | 65.86     | 0.00    |
|                              | Stable            | -0.13    | 0.07      | -1.96     | 0.05    |

## 2.2.4 Question 2: binary - Young adulthood

| fct                          | term              | estimate | std.error | statistic | p.value |
|------------------------------|-------------------|----------|-----------|-----------|---------|
|                              | (Intercept)       | 2.85     | 0.04      | 72.82     | 0.00    |
| age                          | 41-60             | 0.46     | 0.07      | 6.98      | 0.00    |
|                              | <= 40             | 0.19     | 0.08      | 2.35      | 0.02    |
| education                    | (Intercept)       | 3.02     | 0.03      | 87.28     | 0.00    |
|                              | Lower             | 0.05     | 0.06      | 0.86      | 0.39    |
| gender                       | (Intercept)       | 3.24     | 0.04      | 86.19     | 0.00    |
|                              | Man               | -0.58    | 0.06      | -9.85     | 0.00    |
|                              | Other/Undisclosed | -0.68    | 0.35      | -1.96     | 0.05    |
| healthcare_experience        | (Intercept)       | 2.88     | 0.03      | 83.82     | 0.00    |
|                              | Yes               | 0.47     | 0.06      | 7.38      | 0.00    |
| cognitive_health             | (Intercept)       | 3.07     | 0.03      | 101.50    | 0.00    |
|                              | Below average     | -0.42    | 0.10      | -4.08     | 0.00    |
| mental_health                | (Intercept)       | 3.06     | 0.03      | 97.59     | 0.00    |
|                              | Below average     | -0.19    | 0.08      | -2.36     | 0.02    |
| illness_experience           | (Intercept)       | 2.99     | 0.04      | 81.65     | 0.00    |
|                              | Yes               | 0.12     | 0.06      | 2.07      | 0.04    |
| brain_disease_caregiver      | (Intercept)       | 2.94     | 0.04      | 77.70     | 0.00    |
|                              | Yes               | 0.21     | 0.06      | 3.63      | 0.00    |
| brain_research_participation | (Intercept)       | 3.06     | 0.04      | 78.97     | 0.00    |
|                              | Yes               | -0.04    | 0.06      | -0.77     | 0.44    |
| relationship                 | (Intercept)       | 3.00     | 0.04      | 70.12     | 0.00    |
|                              | Stable            | 0.07     | 0.06      | 1.19      | 0.23    |

## 2.2.5 Question 2: binary - Middle age

| fct                          | term              | estimate | std.error | statistic | p.value |
|------------------------------|-------------------|----------|-----------|-----------|---------|
|                              | (Intercept)       | 3.01     | 0.04      | 71.66     | 0.00    |
| age                          | 41-60             | 0.52     | 0.07      | 7.17      | 0.00    |
|                              | <= 40             | -0.20    | 0.08      | -2.57     | 0.01    |
| education                    | (Intercept)       | 3.16     | 0.04      | 85.70     | 0.00    |
|                              | Lower             | -0.08    | 0.06      | -1.20     | 0.23    |
| gender                       | (Intercept)       | 3.48     | 0.04      | 82.85     | 0.00    |
|                              | Man               | -0.89    | 0.06      | -14.53    | 0.00    |
|                              | Other/Undisclosed | -1.41    | 0.29      | -4.91     | 0.00    |
| healthcare_experience        | (Intercept)       | 2.99     | 0.04      | 82.84     | 0.00    |
|                              | Yes               | 0.43     | 0.07      | 6.47      | 0.00    |
| cognitive_health             | (Intercept)       | 3.17     | 0.03      | 100.16    | 0.00    |
|                              | Below average     | -0.43    | 0.11      | -3.98     | 0.00    |
| mental_health                | (Intercept)       | 3.19     | 0.03      | 95.93     | 0.00    |
|                              | Below average     | -0.36    | 0.08      | -4.49     | 0.00    |
| illness_experience           | (Intercept)       | 3.09     | 0.04      | 80.68     | 0.00    |
|                              | Yes               | 0.13     | 0.06      | 2.02      | 0.04    |
| brain_disease_caregiver      | (Intercept)       | 2.96     | 0.04      | 77.62     | 0.00    |
|                              | Yes               | 0.43     | 0.06      | 6.89      | 0.00    |
| brain_research_participation | (Intercept)       | 3.12     | 0.04      | 78.37     | 0.00    |
|                              | Yes               | 0.04     | 0.06      | 0.73      | 0.46    |
| relationship                 | (Intercept)       | 3.08     | 0.04      | 69.46     | 0.00    |
|                              | Stable            | 0.11     | 0.06      | 1.79      | 0.07    |



### 2.2.6 Question 2: binary - Old age

| fct                          | term              | estimate | std.error | statistic | p.value |
|------------------------------|-------------------|----------|-----------|-----------|---------|
|                              | (Intercept)       | 3.23     | 0.05      | 69.57     | 0.00    |
| age                          | 41-60             | 0.17     | 0.07      | 2.35      | 0.02    |
|                              | <= 40             | -0.60    | 0.08      | -7.93     | 0.00    |
| education                    | (Intercept)       | 3.24     | 0.04      | 84.73     | 0.00    |
|                              | Lower             | -0.23    | 0.06      | -3.60     | 0.00    |
| gender                       | (Intercept)       | 3.50     | 0.04      | 82.59     | 0.00    |
|                              | Man               | -0.88    | 0.06      | -14.25    | 0.00    |
|                              | Other/Undisclosed | -1.05    | 0.33      | -3.17     | 0.00    |
| healthcare_experience        | (Intercept)       | 3.04     | 0.04      | 82.38     | 0.00    |
|                              | Yes               | 0.35     | 0.07      | 5.26      | 0.00    |
| cognitive_health             | (Intercept)       | 3.19     | 0.03      | 99.83     | 0.00    |
|                              | Below average     | -0.42    | 0.11      | -3.87     | 0.00    |
| mental_health                | (Intercept)       | 3.23     | 0.03      | 95.43     | 0.00    |
|                              | Below average     | -0.43    | 0.08      | -5.41     | 0.00    |
| illness_experience           | (Intercept)       | 3.12     | 0.04      | 80.34     | 0.00    |
|                              | Yes               | 0.10     | 0.06      | 1.59      | 0.11    |
| brain_disease_caregiver      | (Intercept)       | 3.02     | 0.04      | 77.11     | 0.00    |
|                              | Yes               | 0.34     | 0.06      | 5.48      | 0.00    |
| brain_research_participation | (Intercept)       | 3.09     | 0.04      | 78.74     | 0.00    |
|                              | Yes               | 0.19     | 0.06      | 2.97      | 0.00    |
| relationship                 | (Intercept)       | 3.06     | 0.04      | 69.64     | 0.00    |
|                              | Stable            | 0.19     | 0.06      | 3.09      | 0.00    |

### 2.3 ordinal

1  
2  
3  
4  
5  
6  
7  
8  
9  
10  
11  
12  
13  
14  
15  
16  
17  
18  
19  
20  
21  
22  
23  
24  
25  
26  
27  
28  
29  
30  
31  
32  
33  
34  
35  
36  
37  
38  
39  
40  
41  
42  
43  
44  
45  
46  
47  
48  
49  
50  
51  
52  
53  
54  
55  
56  
57  
58  
59  
60

For peer review only

## 2.3.1 Question 2: ordinal - In the womb

| fct                          | term                               | estimate | std.error | statistic | coef.type   |
|------------------------------|------------------------------------|----------|-----------|-----------|-------------|
| age                          | 41-60                              | -0.36    | 0.03      | -14.07    | coefficient |
|                              | <= 40                              | -0.41    | 0.03      | -11.92    | coefficient |
|                              | Very important Important           | -0.01    | 0.02      | -0.53     | scale       |
|                              | Important Moderately important     | 1.44     | 0.02      | 71.71     | scale       |
|                              | Moderately important Not important | 2.82     | 0.03      | 91.71     | scale       |
| education                    | Lower                              | 0.47     | 0.02      | 19.05     | coefficient |
|                              | Very important Important           | 0.34     | 0.01      | 23.35     | scale       |
|                              | Important Moderately important     | 1.80     | 0.02      | 95.88     | scale       |
|                              | Moderately important Not important | 3.18     | 0.03      | 105.37    | scale       |
| gender                       | Man                                | 0.45     | 0.03      | 17.48     | coefficient |
|                              | Other/Undisclosed                  | -0.04    | 0.18      | -0.22     | coefficient |
|                              | Very important Important           | 0.32     | 0.01      | 22.24     | scale       |
|                              | Important Moderately important     | 1.77     | 0.02      | 96.10     | scale       |
|                              | Moderately important Not important | 3.15     | 0.03      | 105.21    | scale       |
| healthcare_experience        | Yes                                | -0.53    | 0.02      | -21.60    | coefficient |
|                              | Very important Important           | -0.01    | 0.02      | -0.67     | scale       |
|                              | Important Moderately important     | 1.45     | 0.02      | 79.21     | scale       |
|                              | Moderately important Not important | 2.83     | 0.03      | 95.62     | scale       |
| cognitive_health             | Below average                      | 0.39     | 0.05      | 8.04      | coefficient |
|                              | Very important Important           | 0.22     | 0.01      | 17.21     | scale       |
|                              | Important Moderately important     | 1.66     | 0.02      | 99.22     | scale       |
|                              | Moderately important Not important | 3.03     | 0.03      | 105.29    | scale       |
| mental_health                | Below average                      | 0.01     | 0.03      | 0.22      | coefficient |
|                              | Very important Important           | 0.19     | 0.01      | 14.94     | scale       |
|                              | Important Moderately important     | 1.64     | 0.02      | 96.26     | scale       |
|                              | Moderately important Not important | 3.01     | 0.03      | 103.92    | scale       |
| illness_experience           | Yes                                | -0.02    | 0.02      | -0.86     | coefficient |
|                              | Very important Important           | 0.18     | 0.02      | 11.94     | scale       |
|                              | Important Moderately important     | 1.63     | 0.02      | 86.00     | scale       |
|                              | Moderately important Not important | 3.00     | 0.03      | 99.60     | scale       |
| brain_disease_caregiver      | Yes                                | -0.17    | 0.02      | -7.15     | coefficient |
|                              | Very important Important           | 0.11     | 0.02      | 7.04      | scale       |
|                              | Important Moderately important     | 1.56     | 0.02      | 80.16     | scale       |
|                              | Moderately important Not important | 2.93     | 0.03      | 96.54     | scale       |
| brain_research_participation | Yes                                | -0.02    | 0.02      | -0.83     | coefficient |
|                              | Very important Important           | 0.18     | 0.02      | 11.65     | scale       |
|                              | Important Moderately important     | 1.63     | 0.02      | 84.53     | scale       |
|                              | Moderately important Not important | 3.00     | 0.03      | 98.91     | scale       |
| relationship                 | Yes                                | -0.01    | 0.02      | -1.75     | coefficient |
|                              | Very important Important           | 0.17     | 0.02      | 9.50      | scale       |
|                              | Important Moderately important     | 1.61     | 0.02      | 77.14     | scale       |

1  
2  
3  
4  
5  
6  
7  
8  
9  
10  
11  
12  
13  
14  
15  
16  
17  
18  
19  
20  
21  
22  
23  
24  
25  
26  
27  
28  
29  
30  
31  
32  
33  
34  
35  
36  
37  
38  
39  
40  
41  
42  
43  
44  
45  
46  
47  
48  
49  
50  
51  
52  
53  
54  
55  
56  
57  
58  
59  
60

For peer review only

## 2.3.2 Question 2: ordinal - Childhood

| fct                          | term                               | estimate | std.error | statistic | coef.type   |
|------------------------------|------------------------------------|----------|-----------|-----------|-------------|
| age                          | 41-60                              | -0.42    | 0.03      | -14.34    | coefficient |
|                              | <= 40                              | -0.75    | 0.04      | -17.90    | coefficient |
|                              | Very important Important           | 0.67     | 0.02      | 35.65     | scale       |
|                              | Important Moderately important     | 2.68     | 0.03      | 89.23     | scale       |
|                              | Moderately important Not important | 4.83     | 0.08      | 62.19     | scale       |
| education                    | Lower                              | 0.40     | 0.03      | 14.12     | coefficient |
|                              | Very important Important           | 1.06     | 0.02      | 63.85     | scale       |
|                              | Important Moderately important     | 3.07     | 0.03      | 104.07    | scale       |
|                              | Moderately important Not important | 5.21     | 0.08      | 67.28     | scale       |
| gender                       | Man                                | 0.30     | 0.03      | 10.27     | coefficient |
|                              | Other/Undisclosed                  | -0.26    | 0.22      | -1.18     | coefficient |
|                              | Very important Important           | 1.02     | 0.02      | 62.99     | scale       |
|                              | Important Moderately important     | 3.02     | 0.03      | 103.70    | scale       |
|                              | Moderately important Not important | 5.16     | 0.08      | 66.77     | scale       |
| healthcare_experience        | Yes                                | -0.40    | 0.03      | -14.30    | coefficient |
|                              | Very important Important           | 0.78     | 0.02      | 47.14     | scale       |
|                              | Important Moderately important     | 2.79     | 0.03      | 96.22     | scale       |
|                              | Moderately important Not important | 4.93     | 0.08      | 63.88     | scale       |
| cognitive_health             | Below average                      | 0.34     | 0.05      | 6.48      | coefficient |
|                              | Very important Important           | 0.95     | 0.01      | 68.57     | scale       |
|                              | Important Moderately important     | 2.95     | 0.03      | 106.19    | scale       |
|                              | Moderately important Not important | 5.09     | 0.08      | 66.32     | scale       |
| mental_health                | Below average                      | -0.13    | 0.04      | -3.18     | coefficient |
|                              | Very important Important           | 0.91     | 0.01      | 63.83     | scale       |
|                              | Important Moderately important     | 2.91     | 0.03      | 104.24    | scale       |
|                              | Moderately important Not important | 5.05     | 0.08      | 65.76     | scale       |
| illness_experience           | Yes                                | -0.01    | 0.03      | -0.38     | coefficient |
|                              | Very important Important           | 0.93     | 0.02      | 53.62     | scale       |
|                              | Important Moderately important     | 2.92     | 0.03      | 98.86     | scale       |
|                              | Moderately important Not important | 5.07     | 0.08      | 65.39     | scale       |
| brain_disease_caregiver      | Yes                                | 0.02     | 0.03      | 0.88      | coefficient |
|                              | Very important Important           | 0.94     | 0.02      | 51.38     | scale       |
|                              | Important Moderately important     | 2.94     | 0.03      | 97.21     | scale       |
|                              | Moderately important Not important | 5.08     | 0.08      | 65.38     | scale       |
| brain_research_participation | Yes                                | 0.08     | 0.03      | 2.96      | coefficient |
|                              | Very important Important           | 0.96     | 0.02      | 53.99     | scale       |
|                              | Important Moderately important     | 2.96     | 0.03      | 98.75     | scale       |
|                              | Moderately important Not important | 5.11     | 0.08      | 65.76     | scale       |
| relationship                 | Below average                      | 0.05     | 0.03      | 2.03      | coefficient |
|                              | Very important Important           | 0.96     | 0.02      | 47.50     | scale       |
|                              | Important Moderately important     | 2.96     | 0.03      | 94.07     | scale       |

1  
2  
3  
4  
5  
6  
7  
8  
9  
10  
11  
12  
13  
14  
15  
16  
17  
18  
19  
20  
21  
22  
23  
24  
25  
26  
27  
28  
29  
30  
31  
32  
33  
34  
35  
36  
37  
38  
39  
40  
41  
42  
43  
44  
45  
46  
47  
48  
49  
50  
51  
52  
53  
54  
55  
56  
57  
58  
59  
60

For peer review only

## 2.3.3 Question 2: ordinal - Adolescence

| fct                          | term                               | estimate | std.error | statistic | coef.type   |
|------------------------------|------------------------------------|----------|-----------|-----------|-------------|
| age                          | 41-60                              | -0.38    | 0.03      | -13.32    | coefficient |
|                              | <= 40                              | -0.66    | 0.04      | -16.26    | coefficient |
|                              | Very important Important           | 0.62     | 0.02      | 33.11     | scale       |
|                              | Important Moderately important     | 3.12     | 0.04      | 88.13     | scale       |
|                              | Moderately important Not important | 5.56     | 0.11      | 50.61     | scale       |
| education                    | Lower                              | 0.23     | 0.03      | 8.34      | coefficient |
|                              | Very important Important           | 0.93     | 0.02      | 57.62     | scale       |
|                              | Important Moderately important     | 3.42     | 0.03      | 98.66     | scale       |
|                              | Moderately important Not important | 5.86     | 0.11      | 53.44     | scale       |
| gender                       | Man                                | 0.34     | 0.03      | 12.01     | coefficient |
|                              | Other/Undisclosed                  | -0.31    | 0.22      | -1.43     | coefficient |
|                              | Very important Important           | 0.95     | 0.02      | 59.87     | scale       |
|                              | Important Moderately important     | 3.45     | 0.03      | 99.56     | scale       |
|                              | Moderately important Not important | 5.89     | 0.11      | 53.71     | scale       |
| healthcare_experience        | Yes                                | -0.35    | 0.03      | -12.77    | coefficient |
|                              | Very important Important           | 0.72     | 0.02      | 44.12     | scale       |
|                              | Important Moderately important     | 3.22     | 0.03      | 93.38     | scale       |
|                              | Moderately important Not important | 5.66     | 0.11      | 51.65     | scale       |
| cognitive_health             | Below average                      | 0.27     | 0.05      | 4.99      | coefficient |
|                              | Very important Important           | 0.87     | 0.01      | 63.84     | scale       |
|                              | Important Moderately important     | 3.36     | 0.03      | 100.36    | scale       |
|                              | Moderately important Not important | 5.80     | 0.11      | 53.07     | scale       |
| mental_health                | Below average                      | -0.12    | 0.04      | -3.07     | coefficient |
|                              | Very important Important           | 0.84     | 0.01      | 59.49     | scale       |
|                              | Important Moderately important     | 3.33     | 0.03      | 99.00     | scale       |
|                              | Moderately important Not important | 5.77     | 0.11      | 52.75     | scale       |
| illness_experience           | Yes                                | -0.04    | 0.03      | -1.55     | coefficient |
|                              | Very important Important           | 0.84     | 0.02      | 49.34     | scale       |
|                              | Important Moderately important     | 3.33     | 0.03      | 95.27     | scale       |
|                              | Moderately important Not important | 5.77     | 0.11      | 52.54     | scale       |
| brain_disease_caregiver      | Yes                                | -0.02    | 0.03      | -0.64     | coefficient |
|                              | Very important Important           | 0.85     | 0.02      | 47.15     | scale       |
|                              | Important Moderately important     | 3.34     | 0.04      | 94.16     | scale       |
|                              | Moderately important Not important | 5.78     | 0.11      | 52.54     | scale       |
| brain_research_participation | Yes                                | -0.01    | 0.03      | -0.30     | coefficient |
|                              | Very important Important           | 0.85     | 0.02      | 48.79     | scale       |
|                              | Important Moderately important     | 3.34     | 0.04      | 94.96     | scale       |
|                              | Moderately important Not important | 5.78     | 0.11      | 52.62     | scale       |
| relationship                 | Below average                      | 0.10     | 0.03      | 3.76      | coefficient |
|                              | Very important Important           | 0.91     | 0.02      | 45.45     | scale       |
|                              | Important Moderately important     | 3.40     | 0.04      | 92.85     | scale       |

1  
2  
3  
4  
5  
6  
7  
8  
9  
10  
11  
12  
13  
14  
15  
16  
17  
18  
19  
20  
21  
22  
23  
24  
25  
26  
27  
28  
29  
30  
31  
32  
33  
34  
35  
36  
37  
38  
39  
40  
41  
42  
43  
44  
45  
46  
47  
48  
49  
50  
51  
52  
53  
54  
55  
56  
57  
58  
59  
60

For peer review only



## 2.3.4 Question 2: ordinal - Young adulthood

| fct                          | term                               | estimate | std.error | statistic | coef.type   |
|------------------------------|------------------------------------|----------|-----------|-----------|-------------|
| age                          | 41-60                              | -0.24    | 0.03      | -8.95     | coefficient |
|                              | <= 40                              | -0.26    | 0.04      | -7.34     | coefficient |
|                              | Very important Important           | 0.25     | 0.02      | 14.00     | scale       |
|                              | Important Moderately important     | 2.91     | 0.03      | 92.85     | scale       |
|                              | Moderately important Not important | 6.22     | 0.14      | 42.91     | scale       |
| education                    | Lower                              | 0.05     | 0.03      | 2.10      | coefficient |
|                              | Very important Important           | 0.40     | 0.01      | 26.85     | scale       |
|                              | Important Moderately important     | 3.05     | 0.03      | 101.48    | scale       |
|                              | Moderately important Not important | 6.36     | 0.14      | 43.97     | scale       |
| gender                       | Man                                | 0.41     | 0.03      | 15.28     | coefficient |
|                              | Other/Undisclosed                  | 0.11     | 0.18      | 0.59      | coefficient |
|                              | Very important Important           | 0.50     | 0.01      | 33.92     | scale       |
|                              | Important Moderately important     | 3.17     | 0.03      | 104.40    | scale       |
|                              | Moderately important Not important | 6.48     | 0.14      | 44.75     | scale       |
| healthcare_experience        | Yes                                | -0.32    | 0.03      | -12.52    | coefficient |
|                              | Very important Important           | 0.26     | 0.02      | 16.82     | scale       |
|                              | Important Moderately important     | 2.92     | 0.03      | 97.06     | scale       |
|                              | Moderately important Not important | 6.24     | 0.14      | 43.08     | scale       |
| cognitive_health             | Below average                      | 0.15     | 0.05      | 3.02      | coefficient |
|                              | Very important Important           | 0.39     | 0.01      | 30.73     | scale       |
|                              | Important Moderately important     | 3.05     | 0.03      | 104.72    | scale       |
|                              | Moderately important Not important | 6.36     | 0.14      | 43.98     | scale       |
| mental_health                | Below average                      | 0.01     | 0.04      | 0.21      | coefficient |
|                              | Very important Important           | 0.38     | 0.01      | 28.96     | scale       |
|                              | Important Moderately important     | 3.04     | 0.03      | 103.73    | scale       |
|                              | Moderately important Not important | 6.35     | 0.14      | 43.91     | scale       |
| illness_experience           | Yes                                | -0.11    | 0.02      | -4.58     | coefficient |
|                              | Very important Important           | 0.34     | 0.02      | 21.24     | scale       |
|                              | Important Moderately important     | 2.99     | 0.03      | 98.32     | scale       |
|                              | Moderately important Not important | 6.30     | 0.14      | 43.52     | scale       |
| brain_disease_caregiver      | Yes                                | -0.18    | 0.02      | -7.39     | coefficient |
|                              | Very important Important           | 0.30     | 0.02      | 17.92     | scale       |
|                              | Important Moderately important     | 2.96     | 0.03      | 96.03     | scale       |
|                              | Moderately important Not important | 6.27     | 0.14      | 43.25     | scale       |
| brain_research_participation | Yes                                | -0.08    | 0.02      | -3.25     | coefficient |
|                              | Very important Important           | 0.35     | 0.02      | 21.43     | scale       |
|                              | Important Moderately important     | 3.00     | 0.03      | 97.93     | scale       |
|                              | Moderately important Not important | 6.31     | 0.14      | 43.57     | scale       |
| relationship                 | Stable                             | 0.03     | 0.02      | 1.06      | coefficient |
|                              | Very important Important           | 0.40     | 0.02      | 21.44     | scale       |
|                              | Important Moderately important     | 3.05     | 0.03      | 95.27     | scale       |

1  
2  
3  
4  
5  
6  
7  
8  
9  
10  
11  
12  
13  
14  
15  
16  
17  
18  
19  
20  
21  
22  
23  
24  
25  
26  
27  
28  
29  
30  
31  
32  
33  
34  
35  
36  
37  
38  
39  
40  
41  
42  
43  
44  
45  
46  
47  
48  
49  
50  
51  
52  
53  
54  
55  
56  
57  
58  
59  
60

For peer review only

## 2.3.5 Question 2: ordinal - Middle age

| fct                          | term                               | estimate | std.error | statistic | coef.type   |
|------------------------------|------------------------------------|----------|-----------|-----------|-------------|
| age                          | 41-60                              | -0.35    | 0.03      | -12.69    | coefficient |
|                              | <= 40                              | 0.01     | 0.04      | 0.31      | coefficient |
|                              | Very important Important           | 0.46     | 0.02      | 25.37     | scale       |
|                              | Important Moderately important     | 3.02     | 0.03      | 92.29     | scale       |
|                              | Moderately important Not important | 6.23     | 0.14      | 42.97     | scale       |
| education                    | Lower                              | 0.04     | 0.03      | 1.47      | coefficient |
|                              | Very important Important           | 0.60     | 0.02      | 39.50     | scale       |
|                              | Important Moderately important     | 3.15     | 0.03      | 100.24    | scale       |
|                              | Moderately important Not important | 6.36     | 0.14      | 43.94     | scale       |
| gender                       | Man                                | 0.54     | 0.03      | 19.79     | coefficient |
|                              | Other/Undisclosed                  | 0.47     | 0.18      | 2.58      | coefficient |
|                              | Very important Important           | 0.75     | 0.02      | 49.03     | scale       |
|                              | Important Moderately important     | 3.32     | 0.03      | 104.16    | scale       |
|                              | Moderately important Not important | 6.53     | 0.14      | 45.10     | scale       |
| healthcare_experience        | Yes                                | -0.23    | 0.03      | -8.82     | coefficient |
|                              | Very important Important           | 0.50     | 0.02      | 31.56     | scale       |
|                              | Important Moderately important     | 3.05     | 0.03      | 96.76     | scale       |
|                              | Moderately important Not important | 6.26     | 0.14      | 43.28     | scale       |
| cognitive_health             | Below average                      | 0.15     | 0.05      | 2.97      | coefficient |
|                              | Very important Important           | 0.60     | 0.01      | 45.89     | scale       |
|                              | Important Moderately important     | 3.15     | 0.03      | 103.43    | scale       |
|                              | Moderately important Not important | 6.36     | 0.14      | 43.99     | scale       |
| mental_health                | Below average                      | 0.06     | 0.04      | 1.59      | coefficient |
|                              | Very important Important           | 0.59     | 0.01      | 44.04     | scale       |
|                              | Important Moderately important     | 3.14     | 0.03      | 102.64    | scale       |
|                              | Moderately important Not important | 6.35     | 0.14      | 43.96     | scale       |
| illness_experience           | Yes                                | -0.06    | 0.03      | -2.41     | coefficient |
|                              | Very important Important           | 0.56     | 0.02      | 34.72     | scale       |
|                              | Important Moderately important     | 3.11     | 0.03      | 97.73     | scale       |
|                              | Moderately important Not important | 6.32     | 0.14      | 43.66     | scale       |
| brain_disease_caregiver      | Yes                                | -0.32    | 0.03      | -12.90    | coefficient |
|                              | Very important Important           | 0.44     | 0.02      | 26.09     | scale       |
|                              | Important Moderately important     | 3.00     | 0.03      | 93.80     | scale       |
|                              | Moderately important Not important | 6.21     | 0.14      | 42.87     | scale       |
| brain_research_participation | Yes                                | -0.11    | 0.03      | -4.50     | coefficient |
|                              | Very important Important           | 0.54     | 0.02      | 32.58     | scale       |
|                              | Important Moderately important     | 3.09     | 0.03      | 96.61     | scale       |
|                              | Moderately important Not important | 6.30     | 0.14      | 43.49     | scale       |
| relationship                 | Yes                                | -0.06    | 0.03      | -2.29     | coefficient |
|                              | Very important Important           | 0.56     | 0.02      | 29.54     | scale       |
|                              | Important Moderately important     | 3.10     | 0.03      | 93.44     | scale       |

1  
2  
3  
4  
5  
6  
7  
8  
9  
10  
11  
12  
13  
14  
15  
16  
17  
18  
19  
20  
21  
22  
23  
24  
25  
26  
27  
28  
29  
30  
31  
32  
33  
34  
35  
36  
37  
38  
39  
40  
41  
42  
43  
44  
45  
46  
47  
48  
49  
50  
51  
52  
53  
54  
55  
56  
57  
58  
59  
60

For peer review only

## 2.3.6 Question 2: ordinal - Old age

| fct                          | term                               | estimate | std.error | statistic | coef.type   |
|------------------------------|------------------------------------|----------|-----------|-----------|-------------|
| age                          | 41-60                              | -0.02    | 0.03      | -0.73     | coefficient |
|                              | <= 40                              | 0.30     | 0.04      | 7.86      | coefficient |
|                              | Very important Important           | 1.02     | 0.02      | 51.00     | scale       |
|                              | Important Moderately important     | 3.21     | 0.03      | 94.19     | scale       |
|                              | Moderately important Not important | 5.63     | 0.10      | 56.36     | scale       |
| education                    | Lower                              | 0.14     | 0.03      | 4.92      | coefficient |
|                              | Very important Important           | 1.03     | 0.02      | 62.27     | scale       |
|                              | Important Moderately important     | 3.21     | 0.03      | 100.08    | scale       |
|                              | Moderately important Not important | 5.63     | 0.10      | 56.74     | scale       |
| gender                       | Man                                | 0.41     | 0.03      | 14.21     | coefficient |
|                              | Other/Undisclosed                  | 0.50     | 0.19      | 2.67      | coefficient |
|                              | Very important Important           | 1.11     | 0.02      | 67.19     | scale       |
|                              | Important Moderately important     | 3.30     | 0.03      | 102.30    | scale       |
|                              | Moderately important Not important | 5.72     | 0.10      | 57.61     | scale       |
| healthcare_experience        | Yes                                | -0.13    | 0.03      | -4.73     | coefficient |
|                              | Very important Important           | 0.93     | 0.02      | 54.50     | scale       |
|                              | Important Moderately important     | 3.11     | 0.03      | 96.61     | scale       |
|                              | Moderately important Not important | 5.53     | 0.10      | 55.76     | scale       |
| cognitive_health             | Below average                      | 0.15     | 0.06      | 2.77      | coefficient |
|                              | Very important Important           | 0.99     | 0.01      | 70.78     | scale       |
|                              | Important Moderately important     | 3.17     | 0.03      | 103.01    | scale       |
|                              | Moderately important Not important | 5.59     | 0.10      | 56.60     | scale       |
| mental_health                | Below average                      | 0.11     | 0.04      | 2.83      | coefficient |
|                              | Very important Important           | 1.00     | 0.01      | 68.38     | scale       |
|                              | Important Moderately important     | 3.18     | 0.03      | 102.29    | scale       |
|                              | Moderately important Not important | 5.60     | 0.10      | 56.61     | scale       |
| illness_experience           | Yes                                | -0.04    | 0.03      | -1.47     | coefficient |
|                              | Very important Important           | 0.97     | 0.02      | 55.33     | scale       |
|                              | Important Moderately important     | 3.15     | 0.03      | 96.92     | scale       |
|                              | Moderately important Not important | 5.57     | 0.10      | 56.04     | scale       |
| brain_disease_caregiver      | Yes                                | -0.26    | 0.03      | -9.43     | coefficient |
|                              | Very important Important           | 0.87     | 0.02      | 48.00     | scale       |
|                              | Important Moderately important     | 3.05     | 0.03      | 93.46     | scale       |
|                              | Moderately important Not important | 5.47     | 0.10      | 55.05     | scale       |
| brain_research_participation | Yes                                | -0.19    | 0.03      | -6.92     | coefficient |
|                              | Very important Important           | 0.90     | 0.02      | 51.14     | scale       |
|                              | Important Moderately important     | 3.08     | 0.03      | 94.99     | scale       |
|                              | Moderately important Not important | 5.50     | 0.10      | 55.42     | scale       |
| relationship                 | Yes                                | -0.08    | 0.03      | -2.82     | coefficient |
|                              | Very important Important           | 0.94     | 0.02      | 46.55     | scale       |
|                              | Important Moderately important     | 3.12     | 0.03      | 91.85     | scale       |

1  
2  
3  
4  
5  
6  
7  
8  
9  
10  
11  
12  
13  
14  
15  
16  
17  
18  
19  
20  
21  
22  
23  
24  
25  
26  
27  
28  
29  
30  
31  
32  
33  
34  
35  
36  
37  
38  
39  
40  
41  
42  
43  
44  
45  
46  
47  
48  
49  
50  
51  
52  
53  
54  
55  
56  
57  
58  
59  
60

**2.4 bin\_vs\_cont**

For peer review only

## 2.4.1 Question 2: bin\_vs\_cont - In the womb

| fct                     | term              | log_odds | std.error | statistic | p.value | cont_term         | cont_beta |
|-------------------------|-------------------|----------|-----------|-----------|---------|-------------------|-----------|
| age                     | 41-60             | 0.40     | 0.04      | 10.94     | 0.00    | 41-60             | -0.1      |
|                         | <= 40             | 0.39     | 0.05      | 8.04      | 0.00    | <= 40             | -0.1      |
| education               | Lower             | -0.52    | 0.03      | -15.42    | 0.00    | Lower             | 0.2       |
| gender                  | Man               | -0.54    | 0.03      | -15.83    | 0.00    | Man               | 0.2       |
|                         | Other/Undisclosed | 0.04     | 0.26      | 0.15      | 0.88    | Other/Undisclosed | -0.0      |
| healthcare_experience   | Yes               | 0.65     | 0.04      | 17.78     | 0.00    | Yes               | -0.2      |
| cognitive_health        | Below average     | -0.51    | 0.06      | -8.47     | 0.00    | Below average     | 0.2       |
| mental_health           | Below average     | -0.14    | 0.05      | -3.00     | 0.00    | Below average     | 0.0       |
| illness_experience      | Yes               | -0.02    | 0.03      | -0.65     | 0.52    | Yes               | 0.0       |
| brain_disease_caregiver | Yes               | 0.24     | 0.03      | 7.35      | 0.00    | Yes               | -0.0      |
| relationship            | Stable            | 0.06     | 0.03      | 1.88      | 0.06    | Stable            | -0.0      |

### 2.4.2 Question 2: bin\_vs\_cont - Childhood

| fct                          | term          | log_odds | std.error | statistic | p.value | cont_term     | cont_beta |
|------------------------------|---------------|----------|-----------|-----------|---------|---------------|-----------|
| age                          | 41-60         | 0.57     | 0.06      | 9.17      | 0.00    | 41-60         | -0.12     |
|                              | <= 40         | 0.64     | 0.09      | 7.26      | 0.00    | <= 40         | -0.18     |
| education                    | Lower         | -0.56    | 0.06      | -9.99     | 0.00    | Lower         | 0.11      |
| gender                       | Man           | -0.52    | 0.06      | -9.23     | 0.00    | Man           | 0.09      |
| healthcare_experience        | Yes           | 0.72     | 0.06      | 11.26     | 0.00    | Yes           | -0.11     |
| cognitive_health             | Below average | -0.58    | 0.09      | -6.21     | 0.00    | Below average | 0.12      |
| illness_experience           | Yes           | -0.08    | 0.06      | -1.48     | 0.14    | Yes           | 0.00      |
| brain_research_participation | Yes           | -0.07    | 0.06      | -1.31     | 0.19    | Yes           | 0.02      |
| relationship                 | Stable        | -0.10    | 0.06      | -1.76     | 0.08    | Stable        | 0.02      |



### 2.4.3 Question 2: bin\_vs\_cont - Adolescence

| fct                   | term          | log_odds | std.error | statistic | p.value | cont_term     | cont_beta | cont_s |
|-----------------------|---------------|----------|-----------|-----------|---------|---------------|-----------|--------|
|                       | 41-60         | 0.54     | 0.07      | 7.18      | 0.00    | 41-60         | -0.10     |        |
| age                   | <= 40         | 0.76     | 0.11      | 6.79      | 0.00    | <= 40         | -0.16     |        |
| education             | Lower         | -0.40    | 0.07      | -5.93     | 0.00    | Lower         | 0.06      |        |
| gender                | Man           | -0.39    | 0.07      | -5.59     | 0.00    | Man           | 0.09      |        |
| healthcare_experience | Yes           | 0.58     | 0.08      | 7.74      | 0.00    | Yes           | -0.09     |        |
| cognitive_health      | Below average | -0.69    | 0.11      | -6.44     | 0.00    | Below average | 0.09      |        |
| relationship          | Stable        | -0.13    | 0.07      | -1.96     | 0.05    | Stable        | 0.03      |        |

## 2.4.4 Question 2: bin\_vs\_cont - Young adulthood

| fct                     | term              | log_odds | std.error | statistic | p.value | cont_term         | cont_beta |
|-------------------------|-------------------|----------|-----------|-----------|---------|-------------------|-----------|
| age                     | 41-60             | 0.46     | 0.07      | 6.98      | 0.00    | 41-60             | -0.0      |
|                         | <= 40             | 0.19     | 0.08      | 2.35      | 0.02    | <= 40             | -0.0      |
| gender                  | Man               | -0.58    | 0.06      | -9.85     | 0.00    | Man               | 0.1       |
|                         | Other/Undisclosed | -0.68    | 0.35      | -1.96     | 0.05    | Other/Undisclosed | 0.0       |
| healthcare_experience   | Yes               | 0.47     | 0.06      | 7.38      | 0.00    | Yes               | -0.0      |
| cognitive_health        | Below average     | -0.42    | 0.10      | -4.08     | 0.00    | Below average     | 0.0       |
| mental_health           | Below average     | -0.19    | 0.08      | -2.36     | 0.02    | Below average     | 0.0       |
| illness_experience      | Yes               | 0.12     | 0.06      | 2.07      | 0.04    | Yes               | -0.0      |
| brain_disease_caregiver | Yes               | 0.21     | 0.06      | 3.63      | 0.00    | Yes               | -0.0      |

## 2.4.5 Question 2: bin\_vs\_cont - Middle age

| fct                          | term              | log_odds | std.error | statistic | p.value | cont_term         | con |
|------------------------------|-------------------|----------|-----------|-----------|---------|-------------------|-----|
| age                          | 41-60             | 0.52     | 0.07      | 7.17      | 0.00    | 41-60             |     |
|                              | <= 40             | -0.20    | 0.08      | -2.57     | 0.01    | <= 40             |     |
| education                    | Lower             | -0.08    | 0.06      | -1.20     | 0.23    | Lower             |     |
|                              | Man               | -0.89    | 0.06      | -14.53    | 0.00    | Man               |     |
| gender                       | Other/Undisclosed | -1.41    | 0.29      | -4.91     | 0.00    | Other/Undisclosed |     |
|                              | Yes               | 0.43     | 0.07      | 6.47      | 0.00    | Yes               |     |
| healthcare_experience        | Yes               | 0.43     | 0.07      | 6.47      | 0.00    | Yes               |     |
| cognitive_health             | Below average     | -0.43    | 0.11      | -3.98     | 0.00    | Below average     |     |
| mental_health                | Below average     | -0.36    | 0.08      | -4.49     | 0.00    | Below average     |     |
| illness_experience           | Yes               | 0.13     | 0.06      | 2.02      | 0.04    | Yes               |     |
| brain_disease_caregiver      | Yes               | 0.43     | 0.06      | 6.89      | 0.00    | Yes               |     |
| brain_research_participation | Yes               | 0.04     | 0.06      | 0.73      | 0.46    | Yes               |     |
| relationship                 | Stable            | 0.11     | 0.06      | 1.79      | 0.07    | Stable            |     |

#### 2.4.6 Question 2: bin\_vs\_cont - Old age

| fct                          | term              | log_odds | std.error | statistic | p.value | cont_term         | con |
|------------------------------|-------------------|----------|-----------|-----------|---------|-------------------|-----|
| age                          | 41-60             | 0.17     | 0.07      | 2.35      | 0.02    | 41-60             |     |
|                              | <= 40             | -0.60    | 0.08      | -7.93     | 0.00    | <= 40             |     |
| education                    | Lower             | -0.23    | 0.06      | -3.60     | 0.00    | Lower             |     |
|                              | Man               | -0.88    | 0.06      | -14.25    | 0.00    | Man               |     |
| gender                       | Other/Undisclosed | -1.05    | 0.33      | -3.17     | 0.00    | Other/Undisclosed |     |
|                              | Yes               | 0.35     | 0.07      | 5.26      | 0.00    | Yes               |     |
| healthcare_experience        | Yes               | 0.35     | 0.07      | 5.26      | 0.00    | Yes               |     |
| cognitive_health             | Below average     | -0.42    | 0.11      | -3.87     | 0.00    | Below average     |     |
| mental_health                | Below average     | -0.43    | 0.08      | -5.41     | 0.00    | Below average     |     |
| illness_experience           | Yes               | 0.10     | 0.06      | 1.59      | 0.11    | Yes               |     |
| brain_disease_caregiver      | Yes               | 0.34     | 0.06      | 5.48      | 0.00    | Yes               |     |
| brain_research_participation | Yes               | 0.19     | 0.06      | 2.97      | 0.00    | Yes               |     |
| relationship                 | Stable            | 0.19     | 0.06      | 3.09      | 0.00    | Stable            |     |

[[1]] [[1]][[1]] NULL

[[1]][[2]] NULL

[[1]][[3]] NULL

[[1]][[4]] NULL

[[1]][[5]] NULL

[[1]][[6]] NULL

[[2]] [[2]][[1]] NULL

[[2]][[2]] NULL

[[2]][[3]] NULL

[[2]][[4]] NULL

[[2]][[5]] NULL

[[2]][[6]] NULL

[[3]] [[3]][[1]] NULL

[[3]][[2]] NULL

[[3]][[3]] NULL

[[3]][[4]] NULL

[[3]][[5]] NULL

[[3]][[6]] NULL

[[4]] [[4]][[1]] NULL

[[4]][[2]] NULL

[[4]][[3]] NULL

1  
2  
3       [[4]][[4]] NULL

4       [[4]][[5]] NULL

5       [[4]][[6]] NULL  
6  
7  
8  
9  
10  
11  
12  
13  
14  
15  
16  
17  
18  
19  
20  
21  
22  
23  
24  
25  
26  
27  
28  
29  
30  
31  
32  
33  
34  
35  
36  
37  
38  
39  
40  
41  
42  
43  
44  
45  
46  
47  
48  
49  
50  
51  
52  
53  
54  
55  
56  
57  
58  
59  
60

For peer review only

1  
2  
3  
4  
5  
6  
7  
8  
9  
10  
11  
12  
13  
14  
15  
16  
17  
18  
19  
20  
21  
22  
23  
24  
25  
26  
27  
28  
29  
30  
31  
32  
33  
34  
35  
36  
37  
38  
39  
40  
41  
42  
43  
44  
45  
46  
47  
48  
49  
50  
51  
52  
53  
54  
55  
56  
57  
58  
59  
60

**3 Question 3**

**3.1 binary**

For peer review only

## 3.1.1 Question 3: binary - Alzheimer's

| fct                          | term              | estimate | std.error | statistic | p.value |
|------------------------------|-------------------|----------|-----------|-----------|---------|
|                              | (Intercept)       | 4.97     | 0.11      | 46.45     | 0.00    |
| age                          | 41-60             | 0.08     | 0.16      | 0.47      | 0.64    |
|                              | <= 40             | -1.06    | 0.15      | -6.97     | 0.00    |
| education                    | (Intercept)       | 5.02     | 0.09      | 55.72     | 0.00    |
|                              | Lower             | -0.74    | 0.13      | -5.72     | 0.00    |
| gender                       | (Intercept)       | 5.07     | 0.09      | 55.85     | 0.00    |
|                              | Man               | -0.91    | 0.13      | -7.05     | 0.00    |
|                              | Other/Undisclosed | 12.49    | 352.44    | 0.04      | 0.97    |
| healthcare_experience        | (Intercept)       | 4.47     | 0.07      | 61.46     | 0.00    |
|                              | Yes               | 0.86     | 0.16      | 5.45      | 0.00    |
| cognitive_health             | (Intercept)       | 4.75     | 0.07      | 70.47     | 0.00    |
|                              | Below average     | -0.35    | 0.23      | -1.48     | 0.14    |
| mental_health                | (Intercept)       | 4.80     | 0.07      | 66.87     | 0.00    |
|                              | Below average     | -0.44    | 0.16      | -2.69     | 0.01    |
| illness_experience           | (Intercept)       | 4.89     | 0.09      | 53.86     | 0.00    |
|                              | Yes               | -0.38    | 0.13      | -2.91     | 0.00    |
| brain_disease_caregiver      | (Intercept)       | 4.41     | 0.08      | 58.21     | 0.00    |
|                              | Yes               | 0.85     | 0.14      | 5.86      | 0.00    |
| brain_research_participation | (Intercept)       | 4.46     | 0.08      | 59.30     | 0.00    |
|                              | Yes               | 0.78     | 0.15      | 5.29      | 0.00    |
| relationship                 | (Intercept)       | 4.42     | 0.08      | 52.85     | 0.00    |
|                              | Stable            | 0.65     | 0.13      | 4.90      | 0.00    |

## 3.1.2 Question 3: binary - Schizophrenia

| fct                          | term              | estimate | std.error | statistic | p.value |
|------------------------------|-------------------|----------|-----------|-----------|---------|
|                              | (Intercept)       | 2.98     | 0.04      | 72.17     | 0.00    |
| age                          | 41-60             | 0.38     | 0.07      | 5.62      | 0.00    |
|                              | <= 40             | 0.29     | 0.09      | 3.28      | 0.00    |
| education                    | (Intercept)       | 3.33     | 0.04      | 83.62     | 0.00    |
|                              | Lower             | -0.48    | 0.06      | -7.79     | 0.00    |
| gender                       | (Intercept)       | 3.30     | 0.04      | 85.53     | 0.00    |
|                              | Man               | -0.45    | 0.06      | -7.11     | 0.00    |
|                              | Other/Undisclosed | -0.31    | 0.42      | -0.73     | 0.47    |
| healthcare_experience        | (Intercept)       | 3.01     | 0.04      | 82.83     | 0.00    |
|                              | Yes               | 0.42     | 0.07      | 6.33      | 0.00    |
| cognitive_health             | (Intercept)       | 3.21     | 0.03      | 99.65     | 0.00    |
|                              | Below average     | -0.74    | 0.10      | -7.54     | 0.00    |
| mental_health                | (Intercept)       | 3.15     | 0.03      | 96.65     | 0.00    |
|                              | Below average     | 0.00     | 0.09      | 0.03      | 0.97    |
| illness_experience           | (Intercept)       | 3.22     | 0.04      | 79.23     | 0.00    |
|                              | Yes               | -0.17    | 0.06      | -2.74     | 0.01    |
| brain_disease_caregiver      | (Intercept)       | 3.06     | 0.04      | 76.83     | 0.00    |
|                              | Yes               | 0.22     | 0.06      | 3.58      | 0.00    |
| brain_research_participation | (Intercept)       | 3.02     | 0.04      | 79.51     | 0.00    |
|                              | Yes               | 0.33     | 0.06      | 5.23      | 0.00    |
| relationship                 | (Intercept)       | 3.18     | 0.05      | 68.62     | 0.00    |
|                              | Stable            | -0.04    | 0.06      | -0.69     | 0.49    |



## 3.1.3 Question 3: binary - Depression

| fct                          | term              | estimate | std.error | statistic | p.value |
|------------------------------|-------------------|----------|-----------|-----------|---------|
|                              | (Intercept)       | 2.79     | 0.04      | 73.54     | 0.00    |
| age                          | 41-60             | 0.42     | 0.06      | 6.55      | 0.00    |
|                              | <= 40             | 0.26     | 0.08      | 3.15      | 0.00    |
| education                    | (Intercept)       | 3.08     | 0.04      | 86.76     | 0.00    |
|                              | Lower             | -0.33    | 0.06      | -5.67     | 0.00    |
| gender                       | (Intercept)       | 3.08     | 0.03      | 88.33     | 0.00    |
|                              | Man               | -0.36    | 0.06      | -6.21     | 0.00    |
|                              | Other/Undisclosed | 0.10     | 0.46      | 0.23      | 0.82    |
| healthcare_experience        | (Intercept)       | 2.85     | 0.03      | 84.24     | 0.00    |
|                              | Yes               | 0.32     | 0.06      | 5.38      | 0.00    |
| cognitive_health             | (Intercept)       | 2.99     | 0.03      | 102.71    | 0.00    |
|                              | Below average     | -0.31    | 0.10      | -2.94     | 0.00    |
| mental_health                | (Intercept)       | 2.93     | 0.03      | 99.39     | 0.00    |
|                              | Below average     | 0.34     | 0.09      | 3.63      | 0.00    |
| illness_experience           | (Intercept)       | 2.97     | 0.04      | 81.99     | 0.00    |
|                              | Yes               | 0.00     | 0.06      | -0.02     | 0.99    |
| brain_disease_caregiver      | (Intercept)       | 2.87     | 0.04      | 78.49     | 0.00    |
|                              | Yes               | 0.23     | 0.06      | 4.04      | 0.00    |
| brain_research_participation | (Intercept)       | 2.84     | 0.04      | 81.08     | 0.00    |
|                              | Yes               | 0.32     | 0.06      | 5.49      | 0.00    |
| relationship                 | (Intercept)       | 2.98     | 0.04      | 70.44     | 0.00    |
|                              | Stable            | -0.02    | 0.06      | -0.30     | 0.76    |

## 3.1.4 Question 3: binary - Bipolar

| fct                          | term              | estimate | std.error | statistic | p.value |
|------------------------------|-------------------|----------|-----------|-----------|---------|
|                              | (Intercept)       | 2.08     | 0.03      | 73.75     | 0.00    |
| age                          | 41-60             | 0.78     | 0.05      | 15.01     | 0.00    |
|                              | <= 40             | 0.64     | 0.07      | 9.40      | 0.00    |
| education                    | (Intercept)       | 2.76     | 0.03      | 89.77     | 0.00    |
|                              | Lower             | -0.86    | 0.04      | -19.41    | 0.00    |
| gender                       | (Intercept)       | 2.68     | 0.03      | 91.92     | 0.00    |
|                              | Man               | -0.75    | 0.04      | -16.70    | 0.00    |
|                              | Other/Undisclosed | 0.01     | 0.37      | 0.03      | 0.98    |
| healthcare_experience        | (Intercept)       | 2.19     | 0.03      | 85.72     | 0.00    |
|                              | Yes               | 0.70     | 0.05      | 13.78     | 0.00    |
| cognitive_health             | (Intercept)       | 2.45     | 0.02      | 106.57    | 0.00    |
|                              | Below average     | -0.49    | 0.08      | -6.29     | 0.00    |
| mental_health                | (Intercept)       | 2.39     | 0.02      | 102.47    | 0.00    |
|                              | Below average     | 0.25     | 0.07      | 3.60      | 0.00    |
| illness_experience           | (Intercept)       | 2.42     | 0.03      | 84.89     | 0.00    |
|                              | Yes               | -0.01    | 0.04      | -0.29     | 0.77    |
| brain_disease_caregiver      | (Intercept)       | 2.25     | 0.03      | 80.16     | 0.00    |
|                              | Yes               | 0.41     | 0.05      | 8.97      | 0.00    |
| brain_research_participation | (Intercept)       | 2.26     | 0.03      | 82.64     | 0.00    |
|                              | Yes               | 0.41     | 0.05      | 8.96      | 0.00    |
| relationship                 | (Intercept)       | 2.52     | 0.03      | 72.89     | 0.00    |
|                              | Stable            | -0.18    | 0.04      | -3.92     | 0.00    |

## 3.1.5 Question 3: binary - Anxiety

| fct                          | term              | estimate | std.error | statistic | p.value |
|------------------------------|-------------------|----------|-----------|-----------|---------|
|                              | (Intercept)       | 2.09     | 0.03      | 73.83     | 0.00    |
| age                          | 41-60             | 0.43     | 0.05      | 9.24      | 0.00    |
|                              | <= 40             | 0.37     | 0.06      | 5.91      | 0.00    |
| education                    | (Intercept)       | 2.39     | 0.03      | 91.09     | 0.00    |
|                              | Lower             | -0.29    | 0.04      | -6.68     | 0.00    |
| gender                       | (Intercept)       | 2.36     | 0.03      | 92.74     | 0.00    |
|                              | Man               | -0.23    | 0.04      | -5.17     | 0.00    |
|                              | Other/Undisclosed | 0.63     | 0.42      | 1.51      | 0.13    |
| healthcare_experience        | (Intercept)       | 2.22     | 0.03      | 85.81     | 0.00    |
|                              | Yes               | 0.22     | 0.04      | 5.02      | 0.00    |
| cognitive_health             | (Intercept)       | 2.31     | 0.02      | 106.50    | 0.00    |
|                              | Below average     | -0.19    | 0.08      | -2.35     | 0.02    |
| mental_health                | (Intercept)       | 2.25     | 0.02      | 102.17    | 0.00    |
|                              | Below average     | 0.41     | 0.07      | 5.85      | 0.00    |
| illness_experience           | (Intercept)       | 2.27     | 0.03      | 84.71     | 0.00    |
|                              | Yes               | 0.07     | 0.04      | 1.63      | 0.10    |
| brain_disease_caregiver      | (Intercept)       | 2.21     | 0.03      | 80.03     | 0.00    |
|                              | Yes               | 0.19     | 0.04      | 4.55      | 0.00    |
| brain_research_participation | (Intercept)       | 2.18     | 0.03      | 82.34     | 0.00    |
|                              | Yes               | 0.28     | 0.04      | 6.49      | 0.00    |
| relationship                 | (Intercept)       | 2.30     | 0.03      | 72.91     | 0.00    |
|                              | Stable            | 0.00     | 0.04      | 0.00      | 1.00    |

## 3.1.6 Question 3: binary - Addiction

| fct                          | term              | estimate | std.error | statistic | p.value |
|------------------------------|-------------------|----------|-----------|-----------|---------|
|                              | (Intercept)       | 1.86     | 0.03      | 71.70     | 0.00    |
| age                          | 41-60             | 0.31     | 0.04      | 7.54      | 0.00    |
|                              | <= 40             | 0.41     | 0.06      | 7.06      | 0.00    |
| education                    | (Intercept)       | 2.20     | 0.02      | 90.62     | 0.00    |
|                              | Lower             | -0.47    | 0.04      | -12.10    | 0.00    |
| gender                       | (Intercept)       | 2.20     | 0.02      | 92.28     | 0.00    |
|                              | Man               | -0.51    | 0.04      | -12.94    | 0.00    |
|                              | Other/Undisclosed | 0.05     | 0.30      | 0.17      | 0.86    |
| healthcare_experience        | (Intercept)       | 1.81     | 0.02      | 81.89     | 0.00    |
|                              | Yes               | 0.68     | 0.04      | 15.89     | 0.00    |
| cognitive_health             | (Intercept)       | 2.06     | 0.02      | 104.94    | 0.00    |
|                              | Below average     | -0.38    | 0.07      | -5.35     | 0.00    |
| mental_health                | (Intercept)       | 2.02     | 0.02      | 100.44    | 0.00    |
|                              | Below average     | 0.11     | 0.06      | 1.99      | 0.05    |
| illness_experience           | (Intercept)       | 2.02     | 0.02      | 83.23     | 0.00    |
|                              | Yes               | 0.03     | 0.04      | 0.76      | 0.45    |
| brain_disease_caregiver      | (Intercept)       | 1.93     | 0.02      | 77.93     | 0.00    |
|                              | Yes               | 0.23     | 0.04      | 6.04      | 0.00    |
| brain_research_participation | (Intercept)       | 1.93     | 0.02      | 80.24     | 0.00    |
|                              | Yes               | 0.26     | 0.04      | 6.82      | 0.00    |
| relationship                 | (Intercept)       | 2.11     | 0.03      | 72.19     | 0.00    |
|                              | Stable            | -0.13    | 0.04      | -3.46     | 0.00    |

## 3.1.7 Question 3: binary - Stroke

| fct                          | term              | estimate | std.error | statistic | p.value |
|------------------------------|-------------------|----------|-----------|-----------|---------|
|                              | (Intercept)       | 1.97     | 0.03      | 72.84     | 0.00    |
| age                          | 41-60             | 0.15     | 0.04      | 3.60      | 0.00    |
|                              | <= 40             | -0.27    | 0.05      | -5.49     | 0.00    |
| education                    | (Intercept)       | 2.02     | 0.02      | 89.24     | 0.00    |
|                              | Lower             | -0.14    | 0.04      | -3.60     | 0.00    |
| gender                       | (Intercept)       | 2.19     | 0.02      | 92.21     | 0.00    |
|                              | Man               | -0.64    | 0.04      | -16.91    | 0.00    |
|                              | Other/Undisclosed | -0.02    | 0.29      | -0.08     | 0.93    |
| healthcare_experience        | (Intercept)       | 1.70     | 0.02      | 79.82     | 0.00    |
|                              | Yes               | 0.89     | 0.04      | 20.45     | 0.00    |
| cognitive_health             | (Intercept)       | 1.98     | 0.02      | 104.04    | 0.00    |
|                              | Below average     | -0.20    | 0.07      | -2.69     | 0.01    |
| mental_health                | (Intercept)       | 1.98     | 0.02      | 100.01    | 0.00    |
|                              | Below average     | -0.09    | 0.05      | -1.71     | 0.09    |
| illness_experience           | (Intercept)       | 1.88     | 0.02      | 81.56     | 0.00    |
|                              | Yes               | 0.25     | 0.04      | 6.56      | 0.00    |
| brain_disease_caregiver      | (Intercept)       | 1.77     | 0.02      | 75.70     | 0.00    |
|                              | Yes               | 0.48     | 0.04      | 12.70     | 0.00    |
| brain_research_participation | (Intercept)       | 1.88     | 0.02      | 79.61     | 0.00    |
|                              | Yes               | 0.23     | 0.04      | 6.17      | 0.00    |
| relationship                 | (Intercept)       | 1.88     | 0.03      | 70.25     | 0.00    |
|                              | Stable            | 0.16     | 0.04      | 4.31      | 0.00    |

## 3.1.8 Question 3: binary - Parkinson's

| fct                          | term              | estimate | std.error | statistic | p.value |
|------------------------------|-------------------|----------|-----------|-----------|---------|
|                              | (Intercept)       | 1.82     | 0.03      | 71.15     | 0.00    |
| age                          | 41-60             | 0.12     | 0.04      | 3.13      | 0.00    |
|                              | <= 40             | -0.22    | 0.05      | -4.62     | 0.00    |
| education                    | (Intercept)       | 1.99     | 0.02      | 88.93     | 0.00    |
|                              | Lower             | -0.46    | 0.04      | -12.87    | 0.00    |
| gender                       | (Intercept)       | 1.89     | 0.02      | 89.32     | 0.00    |
|                              | Man               | -0.21    | 0.04      | -5.63     | 0.00    |
|                              | Other/Undisclosed | -0.16    | 0.25      | -0.64     | 0.52    |
| healthcare_experience        | (Intercept)       | 1.59     | 0.02      | 77.61     | 0.00    |
|                              | Yes               | 0.72     | 0.04      | 18.08     | 0.00    |
| cognitive_health             | (Intercept)       | 1.84     | 0.02      | 101.83    | 0.00    |
|                              | Below average     | -0.26    | 0.07      | -3.84     | 0.00    |
| mental_health                | (Intercept)       | 1.85     | 0.02      | 98.00     | 0.00    |
|                              | Below average     | -0.17    | 0.05      | -3.47     | 0.00    |
| illness_experience           | (Intercept)       | 1.79     | 0.02      | 80.32     | 0.00    |
|                              | Yes               | 0.08     | 0.04      | 2.33      | 0.02    |
| brain_disease_caregiver      | (Intercept)       | 1.67     | 0.02      | 73.91     | 0.00    |
|                              | Yes               | 0.37     | 0.04      | 10.34     | 0.00    |
| brain_research_participation | (Intercept)       | 1.69     | 0.02      | 76.56     | 0.00    |
|                              | Yes               | 0.35     | 0.04      | 9.55      | 0.00    |
| relationship                 | (Intercept)       | 1.73     | 0.03      | 68.21     | 0.00    |
|                              | Stable            | 0.17     | 0.03      | 4.86      | 0.00    |

## 3.1.9 Question 3: binary - Migraine

| fct                          | term              | estimate | std.error | statistic | p.value |
|------------------------------|-------------------|----------|-----------|-----------|---------|
|                              | (Intercept)       | 1.24     | 0.02      | 58.41     | 0.00    |
| age                          | 41-60             | 0.57     | 0.04      | 16.21     | 0.00    |
|                              | <= 40             | 0.78     | 0.05      | 15.24     | 0.00    |
| education                    | (Intercept)       | 1.68     | 0.02      | 83.96     | 0.00    |
|                              | Lower             | -0.38    | 0.03      | -11.48    | 0.00    |
| gender                       | (Intercept)       | 1.62     | 0.02      | 84.32     | 0.00    |
|                              | Man               | -0.25    | 0.03      | -7.46     | 0.00    |
|                              | Other/Undisclosed | 0.04     | 0.24      | 0.18      | 0.86    |
| healthcare_experience        | (Intercept)       | 1.36     | 0.02      | 71.15     | 0.00    |
|                              | Yes               | 0.56     | 0.03      | 16.24     | 0.00    |
| cognitive_health             | (Intercept)       | 1.57     | 0.02      | 95.25     | 0.00    |
|                              | Below average     | -0.28    | 0.06      | -4.46     | 0.00    |
| mental_health                | (Intercept)       | 1.55     | 0.02      | 90.96     | 0.00    |
|                              | Below average     | 0.02     | 0.05      | 0.46      | 0.65    |
| illness_experience           | (Intercept)       | 1.51     | 0.02      | 74.37     | 0.00    |
|                              | Yes               | 0.11     | 0.03      | 3.28      | 0.00    |
| brain_disease_caregiver      | (Intercept)       | 1.44     | 0.02      | 68.88     | 0.00    |
|                              | Yes               | 0.23     | 0.03      | 7.25      | 0.00    |
| brain_research_participation | (Intercept)       | 1.51     | 0.02      | 72.60     | 0.00    |
|                              | Yes               | 0.10     | 0.03      | 3.06      | 0.00    |
| relationship                 | (Intercept)       | 1.53     | 0.02      | 64.47     | 0.00    |
|                              | Stable            | 0.03     | 0.03      | 1.07      | 0.29    |

## 3.1.10 Question 3: binary - Cancer

| fct                          | term              | estimate | std.error | statistic | p.value |
|------------------------------|-------------------|----------|-----------|-----------|---------|
|                              | (Intercept)       | -0.92    | 0.02      | -46.91    | 0.00    |
| age                          | 41-60             | 0.26     | 0.03      | 9.11      | 0.00    |
|                              | <= 40             | 0.44     | 0.04      | 12.00     | 0.00    |
| education                    | (Intercept)       | -0.66    | 0.02      | -42.71    | 0.00    |
|                              | Lower             | -0.31    | 0.03      | -10.70    | 0.00    |
| gender                       | (Intercept)       | -0.67    | 0.02      | -44.48    | 0.00    |
|                              | Man               | -0.28    | 0.03      | -9.47     | 0.00    |
|                              | Other/Undisclosed | 0.15     | 0.18      | 0.82      | 0.41    |
| healthcare_experience        | (Intercept)       | -0.97    | 0.02      | -56.53    | 0.00    |
|                              | Yes               | 0.56     | 0.03      | 21.18     | 0.00    |
| cognitive_health             | (Intercept)       | -0.74    | 0.01      | -55.40    | 0.00    |
|                              | Below average     | -0.19    | 0.06      | -3.45     | 0.00    |
| mental_health                | (Intercept)       | -0.76    | 0.01      | -54.68    | 0.00    |
|                              | Below average     | 0.09     | 0.04      | 2.29      | 0.02    |
| illness_experience           | (Intercept)       | -0.80    | 0.02      | -47.23    | 0.00    |
|                              | Yes               | 0.12     | 0.03      | 4.61      | 0.00    |
| brain_disease_caregiver      | (Intercept)       | -0.86    | 0.02      | -47.50    | 0.00    |
|                              | Yes               | 0.23     | 0.03      | 8.84      | 0.00    |
| brain_research_participation | (Intercept)       | -0.81    | 0.02      | -46.92    | 0.00    |
|                              | Yes               | 0.15     | 0.03      | 5.82      | 0.00    |
| relationship                 | (Intercept)       | -0.75    | 0.02      | -38.60    | 0.00    |
|                              | Stable            | 0.01     | 0.03      | 0.24      | 0.81    |



## 3.1.11 Question 3: binary - Hypertension

| fct                          | term              | estimate | std.error | statistic | p.value |
|------------------------------|-------------------|----------|-----------|-----------|---------|
|                              | (Intercept)       | -0.66    | 0.02      | -35.09    | 0.00    |
| age                          | 41-60             | -0.12    | 0.03      | -4.33     | 0.00    |
|                              | <= 40             | -0.42    | 0.04      | -10.84    | 0.00    |
| education                    | (Intercept)       | -0.69    | 0.02      | -44.50    | 0.00    |
|                              | Lower             | -0.26    | 0.03      | -9.25     | 0.00    |
| gender                       | (Intercept)       | -0.67    | 0.02      | -44.65    | 0.00    |
|                              | Man               | -0.34    | 0.03      | -11.55    | 0.00    |
|                              | Other/Undisclosed | 0.32     | 0.18      | 1.77      | 0.08    |
| healthcare_experience        | (Intercept)       | -1.10    | 0.02      | -62.05    | 0.00    |
|                              | Yes               | 0.80     | 0.03      | 30.39     | 0.00    |
| cognitive_health             | (Intercept)       | -0.76    | 0.01      | -56.94    | 0.00    |
|                              | Below average     | -0.11    | 0.06      | -1.95     | 0.05    |
| mental_health                | (Intercept)       | -0.74    | 0.01      | -53.62    | 0.00    |
|                              | Below average     | -0.19    | 0.04      | -4.82     | 0.00    |
| illness_experience           | (Intercept)       | -0.84    | 0.02      | -49.49    | 0.00    |
|                              | Yes               | 0.18     | 0.03      | 7.04      | 0.00    |
| brain_disease_caregiver      | (Intercept)       | -0.97    | 0.02      | -52.58    | 0.00    |
|                              | Yes               | 0.42     | 0.03      | 16.24     | 0.00    |
| brain_research_participation | (Intercept)       | -0.86    | 0.02      | -48.95    | 0.00    |
|                              | Yes               | 0.20     | 0.03      | 7.80      | 0.00    |
| relationship                 | (Intercept)       | -0.81    | 0.02      | -41.17    | 0.00    |
|                              | Stable            | 0.08     | 0.03      | 2.96      | 0.00    |

## 3.1.12 Question 3: binary - Diabetes

| fct                          | term              | estimate | std.error | statistic | p.value |
|------------------------------|-------------------|----------|-----------|-----------|---------|
|                              | (Intercept)       | -1.71    | 0.02      | -69.58    | 0.00    |
| age                          | 41-60             | 0.14     | 0.04      | 4.01      | 0.00    |
|                              | <= 40             | -0.04    | 0.05      | -0.91     | 0.36    |
| education                    | (Intercept)       | -1.56    | 0.02      | -81.30    | 0.00    |
|                              | Lower             | -0.36    | 0.04      | -9.50     | 0.00    |
| gender                       | (Intercept)       | -1.61    | 0.02      | -83.95    | 0.00    |
|                              | Man               | -0.22    | 0.04      | -5.85     | 0.00    |
|                              | Other/Undisclosed | 0.53     | 0.21      | 2.59      | 0.01    |
| healthcare_experience        | (Intercept)       | -2.13    | 0.02      | -85.37    | 0.00    |
|                              | Yes               | 1.00     | 0.03      | 29.61     | 0.00    |
| cognitive_health             | (Intercept)       | -1.66    | 0.02      | -97.96    | 0.00    |
|                              | Below average     | -0.02    | 0.07      | -0.27     | 0.79    |
| mental_health                | (Intercept)       | -1.64    | 0.02      | -93.62    | 0.00    |
|                              | Below average     | -0.19    | 0.05      | -3.63     | 0.00    |
| illness_experience           | (Intercept)       | -1.76    | 0.02      | -79.82    | 0.00    |
|                              | Yes               | 0.23     | 0.03      | 6.82      | 0.00    |
| brain_disease_caregiver      | (Intercept)       | -1.85    | 0.02      | -76.95    | 0.00    |
|                              | Yes               | 0.38     | 0.03      | 11.36     | 0.00    |
| brain_research_participation | (Intercept)       | -1.75    | 0.02      | -77.66    | 0.00    |
|                              | Yes               | 0.18     | 0.03      | 5.48      | 0.00    |
| relationship                 | (Intercept)       | -1.66    | 0.02      | -67.06    | 0.00    |
|                              | Stable            | -0.01    | 0.03      | -0.16     | 0.87    |

## 3.1.13 Question 3: binary - Arthritis

| fct                          | term              | estimate | std.error | statistic | p.value |
|------------------------------|-------------------|----------|-----------|-----------|---------|
|                              | (Intercept)       | -3.05    | 0.04      | -71.56    | 0.00    |
| age                          | 41-60             | 0.14     | 0.06      | 2.28      | 0.02    |
|                              | <= 40             | 0.01     | 0.08      | 0.11      | 0.91    |
| education                    | (Intercept)       | -2.97    | 0.03      | -87.93    | 0.00    |
|                              | Lower             | -0.06    | 0.06      | -0.95     | 0.34    |
| gender                       | (Intercept)       | -2.92    | 0.03      | -90.08    | 0.00    |
|                              | Man               | -0.29    | 0.07      | -4.29     | 0.00    |
|                              | Other/Undisclosed | 0.23     | 0.37      | 0.62      | 0.54    |
| healthcare_experience        | (Intercept)       | -3.34    | 0.04      | -78.93    | 0.00    |
|                              | Yes               | 0.75     | 0.06      | 13.23     | 0.00    |
| cognitive_health             | (Intercept)       | -3.01    | 0.03      | -102.46   | 0.00    |
|                              | Below average     | 0.29     | 0.11      | 2.70      | 0.01    |
| mental_health                | (Intercept)       | -2.98    | 0.03      | -98.79    | 0.00    |
|                              | Below average     | -0.05    | 0.08      | -0.53     | 0.60    |
| illness_experience           | (Intercept)       | -3.20    | 0.04      | -79.49    | 0.00    |
|                              | Yes               | 0.47     | 0.06      | 8.25      | 0.00    |
| brain_disease_caregiver      | (Intercept)       | -3.12    | 0.04      | -76.19    | 0.00    |
|                              | Yes               | 0.26     | 0.06      | 4.67      | 0.00    |
| brain_research_participation | (Intercept)       | -3.01    | 0.04      | -79.67    | 0.00    |
|                              | Yes               | 0.04     | 0.06      | 0.65      | 0.52    |
| relationship                 | (Intercept)       | -2.90    | 0.04      | -71.01    | 0.00    |
|                              | Stable            | -0.16    | 0.06      | -2.84     | 0.00    |

[[1]] [[1]][[1]] NULL

[[1]][[2]] NULL

[[1]][[3]] NULL

[[1]][[4]] NULL

[[1]][[5]] NULL

[[1]][[6]] NULL

[[1]][[7]] NULL

[[1]][[8]] NULL

[[1]][[9]] NULL

[[1]][[10]] NULL

[[1]][[11]] NULL

[[1]][[12]] NULL

1  
2  
3  
4  
5  
6  
7  
8  
9  
10  
11  
12  
13  
14  
15  
16  
17  
18  
19  
20  
21  
22  
23  
24  
25  
26  
27  
28  
29  
30  
31  
32  
33  
34  
35  
36  
37  
38  
39  
40  
41  
42  
43  
44  
45  
46  
47  
48  
49  
50  
51  
52  
53  
54  
55  
56  
57  
58  
59  
60

[[1]][[13]] NULL

For peer review only

| SUPPLEMENTARY MATERIAL 1. Demographic characteristics across countries |               |                |                |                |              |                |              |                |              |                |              |                |              |                |            |                |              |                |
|------------------------------------------------------------------------|---------------|----------------|----------------|----------------|--------------|----------------|--------------|----------------|--------------|----------------|--------------|----------------|--------------|----------------|------------|----------------|--------------|----------------|
| Respondents                                                            | All countries | %              | United Kingdom | %              | Netherlands  | %              | Norway       | %              | Spain        | %              | Denmark      | %              | Germany      | %              | Sweden     | %              | Other        | %              |
| Women                                                                  | 19,626        | 71.1 %         | 7,536          | 74.2 %         | 5,304        | 75.5 %         | 2,934        | 82.7 %         | 890          | 42.5 %         | 703          | 63.9 %         | 441          | 41.6 %         | 648        | 85.3 %         | 1,170        | 63.5 %         |
| Men                                                                    | 7,833         | 28.4 %         | 2,591          | 25.5 %         | 1,698        | 24.2 %         | 602          | 17.0 %         | 1,195        | 57.0 %         | 394          | 35.8 %         | 598          | 56.4 %         | 106        | 13.9 %         | 649          | 35.2 %         |
| Other                                                                  | 131           | 0.5 %          | 33             | 0.3 %          | 21           | 0.3 %          | 13           | 0.4 %          | 10           | 0.5 %          | 4            | 0.4 %          | 21           | 2.0 %          | 6          | 0.8 %          | 23           | 1.2 %          |
| <b>Total</b>                                                           | <b>27,590</b> | <b>100.0 %</b> | <b>10,160</b>  | <b>100.0 %</b> | <b>7,023</b> | <b>100.0 %</b> | <b>3,549</b> | <b>100.0 %</b> | <b>2,095</b> | <b>100.0 %</b> | <b>1,101</b> | <b>100.0 %</b> | <b>1,060</b> | <b>100.0 %</b> | <b>760</b> | <b>100.0 %</b> | <b>1,842</b> | <b>100.0 %</b> |
| <b>Age range (years)</b>                                               |               |                |                |                |              |                |              |                |              |                |              |                |              |                |            |                |              |                |
| <40                                                                    | 4,502         | 16.4 %         | 840            | 8.3 %          | 414          | 5.9 %          | 1,135        | 32 %           | 272          | 13 %           | 328          | 29.8 %         | 379          | 35.8 %         | 239        | 31.4 %         | 895          | 48.6 %         |
| 41-60                                                                  | 10,328        | 37.4 %         | 3,373          | 33.2 %         | 2,464        | 35.1 %         | 1,600        | 45.1 %         | 1,285        | 61.3 %         | 400          | 36.3 %         | 237          | 22.4 %         | 377        | 49.6 %         | 592          | 32.1 %         |
| >60                                                                    | 12,760        | 46.2 %         | 5,947          | 58.6 %         | 4,145        | 59.0 %         | 814          | 22.9 %         | 538          | 25.7 %         | 373          | 33.9 %         | 444          | 41.8 %         | 144        | 18.9 %         | 355          | 19.2 %         |
| <b>Education</b>                                                       |               |                |                |                |              |                |              |                |              |                |              |                |              |                |            |                |              |                |
| Higher education                                                       | 18,925        | 68.6 %         | 6,954          | 68.4 %         | 4,279        | 60.9 %         | 2,936        | 82.7 %         | 1,415        | 67.5 %         | 731          | 66.4 %         | 699          | 65.9 %         | 529        | 69.6 %         | 1,382        | 75.0 %         |
| Lower education                                                        | 8,665         | 31.4 %         | 3,206          | 31.6 %         | 2,744        | 39.1 %         | 613          | 17.2 %         | 680          | 32.4 %         | 370          | 33.6 %         | 361          | 34.0 %         | 231        | 30.4 %         | 460          | 25.0 %         |
| <b>Relationship status</b>                                             |               |                |                |                |              |                |              |                |              |                |              |                |              |                |            |                |              |                |
| Married or in a stable relationship                                    | 19,819        | 71.8 %         | 7,545          | 74.3 %         | 4,947        | 70.4 %         | 2,663        | 75.0 %         | 1,480        | 70.6 %         | 754          | 68.5 %         | 708          | 66.8 %         | 529        | 69.6 %         | 1,193        | 64.8 %         |
| Not in a stable relationship                                           | 7,771         | 28.2 %         | 2,615          | 25.7 %         | 2,076        | 29.6 %         | 886          | 25.0 %         | 615          | 29.4 %         | 347          | 31.5 %         | 352          | 33.2 %         | 231        | 30.4 %         | 649          | 35.2 %         |
| <b>Occupation*</b>                                                     |               |                |                |                |              |                |              |                |              |                |              |                |              |                |            |                |              |                |
| Employed for wages                                                     | 14,181        | 51.4 %         | 4,426          | 43.6 %         | 3,089        | 44.0 %         | 2,507        | 70.6 %         | 1,418        | 67.7 %         | 645          | 58.6 %         | 516          | 48.7 %         | 546        | 71.8 %         | 1,034        | 56.1 %         |
| Retired                                                                | 10,550        | 38.2 %         | 5,334          | 52.5 %         | 3,117        | 44.4 %         | 533          | 15.0 %         | 431          | 20.6 %         | 315          | 28.6 %         | 408          | 38.5 %         | 114        | 15.0 %         | 298          | 16.2 %         |
| Other                                                                  | 9,708         | 35.2 %         | 3,188          | 31.3 %         | 2,596        | 37.0 %         | 1,227        | 34.5 %         | 900          | 42.9 %         | 305          | 27.7 %         | 353          | 33.3 %         | 226        | 29.8 %         | 913          | 49.6 %         |
| <b>Employment and/or education in health care</b>                      |               |                |                |                |              |                |              |                |              |                |              |                |              |                |            |                |              |                |
| No                                                                     | 16,955        | 61.5 %         | 6,457          | 63.6 %         | 4,275        | 60.9 %         | 2,070        | 58.3 %         | 1,334        | 63.7 %         | 621          | 56.4 %         | 692          | 65.3 %         | 464        | 61.1 %         | 1,042        | 56.6 %         |
| Yes                                                                    | 10,635        | 38.5 %         | 3,703          | 36.4 %         | 2,748        | 39.1 %         | 1,479        | 41.7 %         | 761          | 36.3 %         | 480          | 43.6 %         | 368          | 34.7 %         | 296        | 38.9 %         | 800          | 43.4 %         |
| <b>Participation in brain research</b>                                 |               |                |                |                |              |                |              |                |              |                |              |                |              |                |            |                |              |                |
| No                                                                     | 15,671        | 56.8 %         | 4,131          | 40.7 %         | 3,906        | 55.6 %         | 2,915        | 82.1 %         | 831          | 39.7 %         | 976          | 88.6 %         | 774          | 73.0 %         | 687        | 90.4 %         | 1,451        | 78.8 %         |
| Yes                                                                    | 11,919        | 43.2 %         | 6,029          | 59.3 %         | 3,117        | 44.4 %         | 634          | 17.9 %         | 1,264        | 60.3 %         | 125          | 11.4 %         | 286          | 27.0 %         | 73         | 9.6 %          | 391          | 21.2 %         |

44  
45  
46

|    |                                                                       |        |       |       |       |       |       |       |       |       |       |       |       |       |       |     |       |       |       |
|----|-----------------------------------------------------------------------|--------|-------|-------|-------|-------|-------|-------|-------|-------|-------|-------|-------|-------|-------|-----|-------|-------|-------|
| 1  | <b>Self-rated cognitive health</b>                                    |        |       |       |       |       |       |       |       |       |       |       |       |       |       |     |       |       |       |
| 2  | Below average                                                         | 1,661  | 6.0%  | 693   | 6.8%  | 406   | 5.8%  | 238   | 6.7%  | 91    | 4.3%  | 42    | 3.8%  | 32    | 3.0%  | 87  | 11.4% | 72    | 3.9%  |
| 3  | Average or above average                                              | 25,929 | 94.0% | 9,467 | 93.2% | 6,617 | 94.2% | 3,311 | 93.3% | 2,004 | 95.7% | 1,059 | 96.2% | 1,028 | 97.0% | 673 | 88.6% | 1,770 | 96.1% |
| 4  |                                                                       |        |       |       |       |       |       |       |       |       |       |       |       |       |       |     |       |       |       |
| 5  |                                                                       |        |       |       |       |       |       |       |       |       |       |       |       |       |       |     |       |       |       |
| 6  | <b>Self-rated mental health</b>                                       |        |       |       |       |       |       |       |       |       |       |       |       |       |       |     |       |       |       |
| 7  | Below average                                                         | 3,632  | 13.2% | 1,306 | 12.9% | 860   | 12.2% | 496   | 14.0% | 206   | 9.8%  | 130   | 11.8% | 169   | 15.9% | 182 | 23.9% | 283   | 15.4% |
| 8  | Average or above average                                              | 23,958 | 86.8% | 8,854 | 87.1% | 6,163 | 87.8% | 3,053 | 86.0% | 1,889 | 90.2% | 971   | 88.2% | 891   | 84.1% | 578 | 76.1% | 1,559 | 84.6% |
| 9  |                                                                       |        |       |       |       |       |       |       |       |       |       |       |       |       |       |     |       |       |       |
| 10 |                                                                       |        |       |       |       |       |       |       |       |       |       |       |       |       |       |     |       |       |       |
| 11 | <b>Experience of illness, disability or health problem</b>            |        |       |       |       |       |       |       |       |       |       |       |       |       |       |     |       |       |       |
| 12 | No                                                                    | 16,451 | 59.6% | 5,806 | 57.1% | 4,216 | 60.0% | 1,971 | 55.5% | 1,527 | 72.9% | 736   | 66.8% | 606   | 57.2% | 372 | 48.9% | 1,217 | 66.1% |
| 13 | Yes                                                                   | 11,139 | 40.4% | 4,354 | 42.9% | 2,807 | 40.0% | 1,578 | 44.5% | 568   | 27.1% | 365   | 33.2% | 454   | 42.8% | 388 | 51.1% | 625   | 33.9% |
| 14 |                                                                       |        |       |       |       |       |       |       |       |       |       |       |       |       |       |     |       |       |       |
| 15 |                                                                       |        |       |       |       |       |       |       |       |       |       |       |       |       |       |     |       |       |       |
| 16 | <b>Experience as caregiver of patient with brain disease</b>          |        |       |       |       |       |       |       |       |       |       |       |       |       |       |     |       |       |       |
| 17 | No                                                                    | 14,762 | 53.5% | 4,355 | 42.9% | 3,686 | 52.5% | 2,206 | 62.2% | 1,254 | 59.9% | 782   | 71.0% | 841   | 79.3% | 459 | 60.4% | 1,179 | 64.0% |
| 18 | Yes                                                                   | 12,828 | 46.5% | 5,805 | 57.1% | 3,337 | 47.5% | 1,343 | 37.8% | 841   | 40.1% | 319   | 29.0% | 219   | 20.7% | 301 | 39.6% | 663   | 36.0% |
| 19 |                                                                       |        |       |       |       |       |       |       |       |       |       |       |       |       |       |     |       |       |       |
| 20 |                                                                       |        |       |       |       |       |       |       |       |       |       |       |       |       |       |     |       |       |       |
| 21 |                                                                       |        |       |       |       |       |       |       |       |       |       |       |       |       |       |     |       |       |       |
| 22 |                                                                       |        |       |       |       |       |       |       |       |       |       |       |       |       |       |     |       |       |       |
| 23 | * Percentages add up to >100% because multiple responses were allowed |        |       |       |       |       |       |       |       |       |       |       |       |       |       |     |       |       |       |
| 24 |                                                                       |        |       |       |       |       |       |       |       |       |       |       |       |       |       |     |       |       |       |
| 25 |                                                                       |        |       |       |       |       |       |       |       |       |       |       |       |       |       |     |       |       |       |
| 26 |                                                                       |        |       |       |       |       |       |       |       |       |       |       |       |       |       |     |       |       |       |
| 27 |                                                                       |        |       |       |       |       |       |       |       |       |       |       |       |       |       |     |       |       |       |
| 28 |                                                                       |        |       |       |       |       |       |       |       |       |       |       |       |       |       |     |       |       |       |
| 29 |                                                                       |        |       |       |       |       |       |       |       |       |       |       |       |       |       |     |       |       |       |
| 30 |                                                                       |        |       |       |       |       |       |       |       |       |       |       |       |       |       |     |       |       |       |
| 31 |                                                                       |        |       |       |       |       |       |       |       |       |       |       |       |       |       |     |       |       |       |
| 32 |                                                                       |        |       |       |       |       |       |       |       |       |       |       |       |       |       |     |       |       |       |
| 33 |                                                                       |        |       |       |       |       |       |       |       |       |       |       |       |       |       |     |       |       |       |
| 34 |                                                                       |        |       |       |       |       |       |       |       |       |       |       |       |       |       |     |       |       |       |
| 35 |                                                                       |        |       |       |       |       |       |       |       |       |       |       |       |       |       |     |       |       |       |
| 36 |                                                                       |        |       |       |       |       |       |       |       |       |       |       |       |       |       |     |       |       |       |
| 37 |                                                                       |        |       |       |       |       |       |       |       |       |       |       |       |       |       |     |       |       |       |
| 38 |                                                                       |        |       |       |       |       |       |       |       |       |       |       |       |       |       |     |       |       |       |
| 39 |                                                                       |        |       |       |       |       |       |       |       |       |       |       |       |       |       |     |       |       |       |
| 40 |                                                                       |        |       |       |       |       |       |       |       |       |       |       |       |       |       |     |       |       |       |
| 41 |                                                                       |        |       |       |       |       |       |       |       |       |       |       |       |       |       |     |       |       |       |
| 42 |                                                                       |        |       |       |       |       |       |       |       |       |       |       |       |       |       |     |       |       |       |
| 43 |                                                                       |        |       |       |       |       |       |       |       |       |       |       |       |       |       |     |       |       |       |
| 44 |                                                                       |        |       |       |       |       |       |       |       |       |       |       |       |       |       |     |       |       |       |
| 45 |                                                                       |        |       |       |       |       |       |       |       |       |       |       |       |       |       |     |       |       |       |
| 46 |                                                                       |        |       |       |       |       |       |       |       |       |       |       |       |       |       |     |       |       |       |

# Lifebrain Global Brain Health Survey Supplementary material 3

Odds ratios and 99% confidence intervals across all demographic characteristics

## Contents

|          |                                                                                                  |           |
|----------|--------------------------------------------------------------------------------------------------|-----------|
| <b>1</b> | <b>Question 1</b>                                                                                | <b>2</b>  |
| 1.1      | In your opinion, does <i>income</i> have an influence on brain health? . . . . .                 | 2         |
| 1.2      | In your opinion, does <i>profession</i> have an influence on brain health? . . . . .             | 3         |
| 1.3      | In your opinion, does <i>education</i> have an influence on brain health? . . . . .              | 4         |
| 1.4      | In your opinion, does <i>diet</i> have an influence on brain health? . . . . .                   | 5         |
| 1.5      | In your opinion, does <i>physical environment</i> have an influence on brain health? . . . . .   | 6         |
| 1.6      | In your opinion, does <i>life goals</i> have an influence on brain health? . . . . .             | 7         |
| 1.7      | In your opinion, does <i>social environment</i> have an influence on brain health? . . . . .     | 8         |
| 1.8      | In your opinion, does <i>sleeping habits</i> have an influence on brain health? . . . . .        | 9         |
| 1.9      | In your opinion, does <i>physical health</i> have an influence on brain health? . . . . .        | 10        |
| 1.10     | In your opinion, does <i>genetics</i> have an influence on brain health? . . . . .               | 11        |
| 1.11     | In your opinion, does <i>substance use</i> have an influence on brain health? . . . . .          | 12        |
| <b>2</b> | <b>Question 2</b>                                                                                | <b>13</b> |
| 2.1      | In your opinion, is it important to look after one's brain in <i>in the womb</i> ? . . . . .     | 13        |
| 2.2      | In your opinion, is it important to look after one's brain in <i>childhood</i> ? . . . . .       | 14        |
| 2.3      | In your opinion, is it important to look after one's brain in <i>adolescence</i> ? . . . . .     | 15        |
| 2.4      | In your opinion, is it important to look after one's brain in <i>young adulthood</i> ? . . . . . | 16        |
| 2.5      | In your opinion, is it important to look after one's brain in <i>middle age</i> ? . . . . .      | 17        |
| 2.6      | In your opinion, is it important to look after one's brain in <i>old age</i> ? . . . . .         | 18        |
| <b>3</b> | <b>Question 3</b>                                                                                | <b>19</b> |
| 3.1      | I associate <i>alzheimer's</i> with the brain. . . . .                                           | 19        |
| 3.2      | I associate <i>schizophrenia</i> with the brain. . . . .                                         | 20        |
| 3.3      | I associate <i>depression</i> with the brain. . . . .                                            | 21        |
| 3.4      | I associate <i>bipolar</i> with the brain. . . . .                                               | 22        |
| 3.5      | I associate <i>anxiety</i> with the brain. . . . .                                               | 23        |
| 3.6      | I associate <i>addiction</i> with the brain. . . . .                                             | 24        |
| 3.7      | I associate <i>stroke</i> with the brain. . . . .                                                | 25        |
| 3.8      | I associate <i>parkinson's</i> with the brain. . . . .                                           | 26        |
| 3.9      | I associate <i>migraine</i> with the brain. . . . .                                              | 27        |
| 3.10     | I associate <i>cancer</i> with the brain. . . . .                                                | 28        |
| 3.11     | I associate <i>hypertension</i> with the brain. . . . .                                          | 29        |
| 3.12     | I associate <i>diabetes</i> with the brain. . . . .                                              | 30        |
| 3.13     | I associate <i>arthritis</i> with the brain. . . . .                                             | 31        |

# 1 Question 1

## 1.1 In your opinion, does *income* have an influence on brain health?

Table 1: Q1 Income

| Variable/Subgroup                   | Descriptive   |        | Inferential |          |       |
|-------------------------------------|---------------|--------|-------------|----------|-------|
|                                     | Positive      | N      | OR          | CI (99%) |       |
|                                     |               |        |             | Lower    | Upper |
| <b>Age</b>                          |               |        |             |          |       |
| >= 61                               | 4 666 (36.8%) | 12 667 |             |          |       |
| <= 40                               | 1 434 (32.0%) | 4 482  | 0.81        | 0.73     | 0.89  |
| 41-60                               | 3 732 (36.3%) | 10 287 | 0.98        | 0.91     | 1.05  |
| <b>Education</b>                    |               |        |             |          |       |
| Higher                              | 6 607 (35.1%) | 18 834 |             |          |       |
| Lower                               | 3 225 (37.5%) | 8 602  | 1.11        | 1.04     | 1.19  |
| <b>Gender</b>                       |               |        |             |          |       |
| Woman                               | 7 061 (36.2%) | 19 527 |             |          |       |
| Man                                 | 2 720 (35.0%) | 7 782  | 0.95        | 0.88     | 1.02  |
| Other/Undisclosed                   | 51 (40.2%)    | 127    | 1.18        | 0.74     | 1.89  |
| <b>Healthcare Experience</b>        |               |        |             |          |       |
| No                                  | 5 641 (33.5%) | 16 855 |             |          |       |
| Yes                                 | 4 191 (39.6%) | 10 581 | 1.30        | 1.22     | 1.39  |
| <b>Cognitive Health</b>             |               |        |             |          |       |
| Average or above                    | 9 227 (35.8%) | 25 787 |             |          |       |
| Below average                       | 605 (36.7%)   | 1 649  | 1.04        | 0.91     | 1.19  |
| <b>Mental Health</b>                |               |        |             |          |       |
| Average or above                    | 8 535 (35.8%) | 23 822 |             |          |       |
| Below average                       | 1 297 (35.9%) | 3 614  | 1.00        | 0.91     | 1.10  |
| <b>Illness Experience</b>           |               |        |             |          |       |
| No                                  | 5 651 (34.5%) | 16 375 |             |          |       |
| Yes                                 | 4 181 (37.8%) | 11 061 | 1.15        | 1.08     | 1.23  |
| <b>Brain Disease Caregiver</b>      |               |        |             |          |       |
| No                                  | 5 199 (35.4%) | 14 682 |             |          |       |
| Yes                                 | 4 633 (36.3%) | 12 754 | 1.04        | 0.97     | 1.11  |
| <b>Brain Research Participation</b> |               |        |             |          |       |
| No                                  | 5 499 (35.3%) | 15 577 |             |          |       |
| Yes                                 | 4 333 (36.5%) | 11 859 | 1.06        | 0.99     | 1.13  |
| <b>Relationship</b>                 |               |        |             |          |       |
| Not stable                          | 4 335 (35.9%) | 12 091 |             |          |       |
| Stable                              | 5 497 (35.8%) | 15 345 | 1.00        | 0.94     | 1.07  |



1.2 In your opinion, does *profession* have an influence on brain health?

Table 2: Q1 Profession

| Variable/Subgroup                   | Descriptive    |        | Inferential |          |       |
|-------------------------------------|----------------|--------|-------------|----------|-------|
|                                     | Positive       | N      | OR          | CI (99%) |       |
|                                     |                |        |             | Lower    | Upper |
| <b>Age</b>                          |                |        |             |          |       |
| >= 61                               | 6 749 (53.2%)  | 12 675 |             |          |       |
| 41-60                               | 5 866 (57.0%)  | 10 300 | 1.16        | 1.08     | 1.24  |
| <= 40                               | 2 701 (60.2%)  | 4 484  | 1.33        | 1.21     | 1.46  |
| <b>Education</b>                    |                |        |             |          |       |
| Higher                              | 10 929 (58.0%) | 18 855 |             |          |       |
| Lower                               | 4 387 (51.0%)  | 8 604  | 0.75        | 0.71     | 0.81  |
| <b>Gender</b>                       |                |        |             |          |       |
| Woman                               | 10 675 (54.6%) | 19 542 |             |          |       |
| Other/Undisclosed                   | 69 (54.3%)     | 127    | 0.99        | 0.62     | 1.57  |
| Man                                 | 4 572 (58.7%)  | 7 790  | 1.18        | 1.10     | 1.27  |
| <b>Healthcare Experience</b>        |                |        |             |          |       |
| No                                  | 9 080 (53.9%)  | 16 861 |             |          |       |
| Yes                                 | 6 236 (58.8%)  | 10 598 | 1.23        | 1.15     | 1.31  |
| <b>Cognitive Health</b>             |                |        |             |          |       |
| Average or above                    | 14 473 (56.1%) | 25 810 |             |          |       |
| Below average                       | 843 (51.1%)    | 1 649  | 0.82        | 0.72     | 0.93  |
| <b>Mental Health</b>                |                |        |             |          |       |
| Average or above                    | 13 404 (56.2%) | 23 847 |             |          |       |
| Below average                       | 1 912 (52.9%)  | 3 612  | 0.88        | 0.80     | 0.96  |
| <b>Illness Experience</b>           |                |        |             |          |       |
| No                                  | 9 234 (56.4%)  | 16 383 |             |          |       |
| Yes                                 | 6 082 (54.9%)  | 11 076 | 0.94        | 0.88     | 1.01  |
| <b>Brain Disease Caregiver</b>      |                |        |             |          |       |
| No                                  | 8 392 (57.2%)  | 14 682 |             |          |       |
| Yes                                 | 6 924 (54.2%)  | 12 777 | 0.89        | 0.83     | 0.94  |
| <b>Brain Research Participation</b> |                |        |             |          |       |
| No                                  | 8 931 (57.3%)  | 15 590 |             |          |       |
| Yes                                 | 6 385 (53.8%)  | 11 869 | 0.87        | 0.81     | 0.92  |
| <b>Relationship</b>                 |                |        |             |          |       |
| Not stable                          | 6 788 (56.1%)  | 12 107 |             |          |       |
| Stable                              | 8 528 (55.5%)  | 15 352 | 0.98        | 0.92     | 1.04  |

1.3 In your opinion, does *education* have an influence on brain health?

Table 3: Q1 Education

| Variable/Subgroup                   | Descriptive    |        | Inferential |          |       |
|-------------------------------------|----------------|--------|-------------|----------|-------|
|                                     | Positive       | N      | OR          | CI (99%) |       |
|                                     |                |        |             | Lower    | Upper |
| <b>Age</b>                          |                |        |             |          |       |
| >= 61                               | 7 722 (60.9%)  | 12 685 |             |          |       |
| 41-60                               | 6 099 (59.2%)  | 10 301 | 0.93        | 0.87     | 1.00  |
| <= 40                               | 2 844 (63.4%)  | 4 487  | 1.11        | 1.01     | 1.22  |
| <b>Education</b>                    |                |        |             |          |       |
| Higher                              | 12 134 (64.3%) | 18 865 |             |          |       |
| Lower                               | 4 531 (52.6%)  | 8 608  | 0.62        | 0.58     | 0.66  |
| <b>Gender</b>                       |                |        |             |          |       |
| Woman                               | 11 695 (59.8%) | 19 550 |             |          |       |
| Man                                 | 4 888 (62.7%)  | 7 796  | 1.13        | 1.05     | 1.21  |
| Other/Undisclosed                   | 82 (64.6%)     | 127    | 1.22        | 0.76     | 1.98  |
| <b>Healthcare Experience</b>        |                |        |             |          |       |
| No                                  | 9 790 (58.0%)  | 16 870 |             |          |       |
| Yes                                 | 6 875 (64.8%)  | 10 603 | 1.33        | 1.25     | 1.42  |
| <b>Cognitive Health</b>             |                |        |             |          |       |
| Average or above                    | 15 811 (61.2%) | 25 824 |             |          |       |
| Below average                       | 854 (51.8%)    | 1 649  | 0.68        | 0.60     | 0.78  |
| <b>Mental Health</b>                |                |        |             |          |       |
| Average or above                    | 14 720 (61.7%) | 23 857 |             |          |       |
| Below average                       | 1 945 (53.8%)  | 3 616  | 0.72        | 0.66     | 0.79  |
| <b>Illness Experience</b>           |                |        |             |          |       |
| No                                  | 10 103 (61.6%) | 16 391 |             |          |       |
| Yes                                 | 6 562 (59.2%)  | 11 082 | 0.90        | 0.85     | 0.96  |
| <b>Brain Disease Caregiver</b>      |                |        |             |          |       |
| No                                  | 9 053 (61.6%)  | 14 698 |             |          |       |
| Yes                                 | 7 612 (59.6%)  | 12 775 | 0.92        | 0.86     | 0.98  |
| <b>Brain Research Participation</b> |                |        |             |          |       |
| No                                  | 9 493 (60.8%)  | 15 609 |             |          |       |
| Yes                                 | 7 172 (60.5%)  | 11 864 | 0.98        | 0.92     | 1.05  |
| <b>Relationship</b>                 |                |        |             |          |       |
| Not stable                          | 7 307 (60.3%)  | 12 114 |             |          |       |
| Stable                              | 9 358 (60.9%)  | 15 359 | 1.03        | 0.96     | 1.09  |

1.4 In your opinion, does *diet* have an influence on brain health?

Table 4: Q1 Diet

| Variable/Subgroup                   | Descriptive    |        | Inferential |          |       |
|-------------------------------------|----------------|--------|-------------|----------|-------|
|                                     | Positive       | N      | OR          | CI (99%) |       |
|                                     |                |        |             | Lower    | Upper |
| <b>Age</b>                          |                |        |             |          |       |
| >= 61                               | 8 411 (66.7%)  | 12 611 |             |          |       |
| 41-60                               | 7 759 (75.6%)  | 10 270 | 1.54        | 1.43     | 1.67  |
| <= 40                               | 3 413 (76.1%)  | 4 482  | 1.59        | 1.44     | 1.77  |
| <b>Education</b>                    |                |        |             |          |       |
| Higher                              | 13 742 (73.1%) | 18 793 |             |          |       |
| Lower                               | 5 841 (68.2%)  | 8 570  | 0.79        | 0.73     | 0.85  |
| <b>Gender</b>                       |                |        |             |          |       |
| Woman                               | 14 352 (73.7%) | 19 471 |             |          |       |
| Man                                 | 5 139 (66.2%)  | 7 765  | 0.70        | 0.65     | 0.75  |
| Other/Undisclosed                   | 92 (72.4%)     | 127    | 0.94        | 0.56     | 1.57  |
| <b>Healthcare Experience</b>        |                |        |             |          |       |
| No                                  | 11 604 (69.0%) | 16 809 |             |          |       |
| Yes                                 | 7 979 (75.6%)  | 10 554 | 1.39        | 1.29     | 1.49  |
| <b>Cognitive Health</b>             |                |        |             |          |       |
| Average or above                    | 18 564 (72.2%) | 25 723 |             |          |       |
| Below average                       | 1 019 (62.1%)  | 1 640  | 0.63        | 0.55     | 0.73  |
| <b>Mental Health</b>                |                |        |             |          |       |
| Average or above                    | 17 170 (72.3%) | 23 752 |             |          |       |
| Below average                       | 2 413 (66.8%)  | 3 611  | 0.77        | 0.70     | 0.85  |
| <b>Illness Experience</b>           |                |        |             |          |       |
| No                                  | 11 860 (72.6%) | 16 328 |             |          |       |
| Yes                                 | 7 723 (70.0%)  | 11 035 | 0.88        | 0.82     | 0.94  |
| <b>Brain Disease Caregiver</b>      |                |        |             |          |       |
| No                                  | 10 236 (70.0%) | 14 630 |             |          |       |
| Yes                                 | 9 347 (73.4%)  | 12 733 | 1.18        | 1.11     | 1.27  |
| <b>Brain Research Participation</b> |                |        |             |          |       |
| No                                  | 11 067 (71.2%) | 15 546 |             |          |       |
| Yes                                 | 8 516 (72.1%)  | 11 817 | 1.04        | 0.97     | 1.12  |
| <b>Relationship</b>                 |                |        |             |          |       |
| Not stable                          | 8 697 (72.0%)  | 12 079 |             |          |       |
| Stable                              | 10 886 (71.2%) | 15 284 | 0.96        | 0.90     | 1.03  |

## 1.5 In your opinion, does *physical environment* have an influence on brain health?

Table 5: Q1 Physical environment

| Variable/Subgroup                   | Descriptive    |        | Inferential |          |       |
|-------------------------------------|----------------|--------|-------------|----------|-------|
|                                     | Positive       | N      | OR          | CI (99%) |       |
|                                     |                |        |             | Lower    | Upper |
| <b>Age</b>                          |                |        |             |          |       |
| >= 61                               | 8 836 (69.8%)  | 12 656 |             |          |       |
| <= 40                               | 3 214 (71.7%)  | 4 480  | 1.10        | 0.99     | 1.21  |
| 41-60                               | 7 655 (74.3%)  | 10 296 | 1.25        | 1.16     | 1.35  |
| <b>Education</b>                    |                |        |             |          |       |
| Higher                              | 13 466 (71.5%) | 18 838 |             |          |       |
| Lower                               | 6 239 (72.6%)  | 8 594  | 1.06        | 0.98     | 1.14  |
| <b>Gender</b>                       |                |        |             |          |       |
| Woman                               | 14 191 (72.7%) | 19 522 |             |          |       |
| Man                                 | 5 416 (69.6%)  | 7 784  | 0.86        | 0.80     | 0.93  |
| Other/Undisclosed                   | 98 (77.8%)     | 126    | 1.31        | 0.76     | 2.29  |
| <b>Healthcare Experience</b>        |                |        |             |          |       |
| No                                  | 11 879 (70.5%) | 16 854 |             |          |       |
| Yes                                 | 7 826 (74.0%)  | 10 578 | 1.19        | 1.11     | 1.28  |
| <b>Cognitive Health</b>             |                |        |             |          |       |
| Average or above                    | 18 601 (72.1%) | 25 791 |             |          |       |
| Below average                       | 1 104 (67.3%)  | 1 641  | 0.79        | 0.69     | 0.91  |
| <b>Mental Health</b>                |                |        |             |          |       |
| Average or above                    | 17 171 (72.1%) | 23 824 |             |          |       |
| Below average                       | 2 534 (70.2%)  | 3 608  | 0.91        | 0.83     | 1.01  |
| <b>Illness Experience</b>           |                |        |             |          |       |
| No                                  | 11 585 (70.7%) | 16 376 |             |          |       |
| Yes                                 | 8 120 (73.4%)  | 11 056 | 1.14        | 1.07     | 1.23  |
| <b>Brain Disease Caregiver</b>      |                |        |             |          |       |
| No                                  | 10 490 (71.5%) | 14 668 |             |          |       |
| Yes                                 | 9 215 (72.2%)  | 12 764 | 1.03        | 0.96     | 1.11  |
| <b>Brain Research Participation</b> |                |        |             |          |       |
| No                                  | 11 164 (71.7%) | 15 575 |             |          |       |
| Yes                                 | 8 541 (72.0%)  | 11 857 | 1.02        | 0.95     | 1.09  |
| <b>Relationship</b>                 |                |        |             |          |       |
| Not stable                          | 8 779 (72.6%)  | 12 095 |             |          |       |
| Stable                              | 10 926 (71.2%) | 15 337 | 0.94        | 0.87     | 1.00  |

1.6 In your opinion, does *life goals* have an influence on brain health?

Table 6: Q1 Life goals

| Variable/Subgroup                   | Descriptive    |        | Inferential |          |       |
|-------------------------------------|----------------|--------|-------------|----------|-------|
|                                     | Positive       | N      | OR          | CI (99%) |       |
|                                     |                |        |             | Lower    | Upper |
| <b>Age</b>                          |                |        |             |          |       |
| >= 61                               | 9 441 (74.3%)  | 12 706 |             |          |       |
| <= 40                               | 3 017 (67.2%)  | 4 488  | 0.71        | 0.64     | 0.78  |
| 41-60                               | 7 551 (73.3%)  | 10 302 | 0.95        | 0.88     | 1.03  |
| <b>Education</b>                    |                |        |             |          |       |
| Higher                              | 13 811 (73.2%) | 18 875 |             |          |       |
| Lower                               | 6 198 (71.9%)  | 8 621  | 0.94        | 0.87     | 1.01  |
| <b>Gender</b>                       |                |        |             |          |       |
| Woman                               | 14 370 (73.5%) | 19 562 |             |          |       |
| Other/Undisclosed                   | 90 (70.9%)     | 127    | 0.88        | 0.53     | 1.46  |
| Man                                 | 5 549 (71.1%)  | 7 807  | 0.89        | 0.82     | 0.96  |
| <b>Healthcare Experience</b>        |                |        |             |          |       |
| No                                  | 11 978 (70.9%) | 16 888 |             |          |       |
| Yes                                 | 8 031 (75.7%)  | 10 608 | 1.28        | 1.19     | 1.37  |
| <b>Cognitive Health</b>             |                |        |             |          |       |
| Average or above                    | 18 839 (72.9%) | 25 846 |             |          |       |
| Below average                       | 1 170 (70.9%)  | 1 650  | 0.91        | 0.78     | 1.05  |
| <b>Mental Health</b>                |                |        |             |          |       |
| Average or above                    | 17 521 (73.4%) | 23 880 |             |          |       |
| Below average                       | 2 488 (68.8%)  | 3 616  | 0.80        | 0.72     | 0.88  |
| <b>Illness Experience</b>           |                |        |             |          |       |
| No                                  | 11 891 (72.5%) | 16 396 |             |          |       |
| Yes                                 | 8 118 (73.1%)  | 11 100 | 1.03        | 0.96     | 1.11  |
| <b>Brain Disease Caregiver</b>      |                |        |             |          |       |
| No                                  | 10 756 (73.1%) | 14 708 |             |          |       |
| Yes                                 | 9 253 (72.4%)  | 12 788 | 0.96        | 0.90     | 1.03  |
| <b>Brain Research Participation</b> |                |        |             |          |       |
| No                                  | 11 550 (74.0%) | 15 611 |             |          |       |
| Yes                                 | 8 459 (71.2%)  | 11 885 | 0.87        | 0.81     | 0.93  |
| <b>Relationship</b>                 |                |        |             |          |       |
| Not stable                          | 8 804 (72.6%)  | 12 121 |             |          |       |
| Stable                              | 11 205 (72.9%) | 15 375 | 1.01        | 0.94     | 1.09  |

1.7 In your opinion, does *social environment* have an influence on brain health?

Table 7: Q1 Social environment

| Variable/Subgroup                   | Descriptive    |        | Inferential |          |       |
|-------------------------------------|----------------|--------|-------------|----------|-------|
|                                     | Positive       | N      | OR          | CI (99%) |       |
|                                     |                |        |             | Lower    | Upper |
| <b>Age</b>                          |                |        |             |          |       |
| >= 61                               | 10 148 (79.9%) | 12 694 |             |          |       |
| 41-60                               | 8 671 (84.1%)  | 10 306 | 1.33        | 1.22     | 1.46  |
| <= 40                               | 3 919 (87.3%)  | 4 488  | 1.73        | 1.52     | 1.97  |
| <b>Education</b>                    |                |        |             |          |       |
| Higher                              | 15 768 (83.6%) | 18 870 |             |          |       |
| Lower                               | 6 970 (80.9%)  | 8 618  | 0.83        | 0.76     | 0.91  |
| <b>Gender</b>                       |                |        |             |          |       |
| Woman                               | 16 441 (84.1%) | 19 559 |             |          |       |
| Man                                 | 6 184 (79.2%)  | 7 804  | 0.72        | 0.66     | 0.79  |
| Other/Undisclosed                   | 113 (90.4%)    | 125    | 1.79        | 0.81     | 3.91  |
| <b>Healthcare Experience</b>        |                |        |             |          |       |
| No                                  | 13 615 (80.6%) | 16 887 |             |          |       |
| Yes                                 | 9 123 (86.1%)  | 10 601 | 1.48        | 1.36     | 1.62  |
| <b>Cognitive Health</b>             |                |        |             |          |       |
| Average or above                    | 21 472 (83.1%) | 25 835 |             |          |       |
| Below average                       | 1 266 (76.6%)  | 1 653  | 0.66        | 0.57     | 0.78  |
| <b>Mental Health</b>                |                |        |             |          |       |
| Average or above                    | 19 732 (82.7%) | 23 870 |             |          |       |
| Below average                       | 3 006 (83.1%)  | 3 618  | 1.03        | 0.91     | 1.16  |
| <b>Illness Experience</b>           |                |        |             |          |       |
| No                                  | 13 612 (83.0%) | 16 398 |             |          |       |
| Yes                                 | 9 126 (82.3%)  | 11 090 | 0.95        | 0.87     | 1.03  |
| <b>Brain Disease Caregiver</b>      |                |        |             |          |       |
| No                                  | 12 120 (82.4%) | 14 705 |             |          |       |
| Yes                                 | 10 618 (83.1%) | 12 783 | 1.05        | 0.96     | 1.14  |
| <b>Brain Research Participation</b> |                |        |             |          |       |
| No                                  | 12 983 (83.2%) | 15 608 |             |          |       |
| Yes                                 | 9 755 (82.1%)  | 11 880 | 0.93        | 0.85     | 1.01  |
| <b>Relationship</b>                 |                |        |             |          |       |
| Not stable                          | 10 054 (82.9%) | 12 122 |             |          |       |
| Stable                              | 12 684 (82.5%) | 15 366 | 0.97        | 0.90     | 1.06  |

1.8 In your opinion, does *sleeping habits* have an influence on brain health?

Table 8: Q1 Sleeping habits

| Variable/Subgroup                   | Descriptive    |        | Inferential |          |       |
|-------------------------------------|----------------|--------|-------------|----------|-------|
|                                     | Positive       | N      | OR          | CI (99%) |       |
|                                     |                |        |             | Lower    | Upper |
| <b>Age</b>                          |                |        |             |          |       |
| >= 61                               | 10 097 (79.6%) | 12 685 |             |          |       |
| 41-60                               | 9 166 (89.0%)  | 10 304 | 2.06        | 1.87     | 2.28  |
| <= 40                               | 4 109 (91.6%)  | 4 488  | 2.78        | 2.39     | 3.23  |
| <b>Education</b>                    |                |        |             |          |       |
| Higher                              | 16 185 (85.8%) | 18 863 |             |          |       |
| Lower                               | 7 187 (83.4%)  | 8 614  | 0.83        | 0.76     | 0.91  |
| <b>Gender</b>                       |                |        |             |          |       |
| Woman                               | 16 921 (86.5%) | 19 554 |             |          |       |
| Man                                 | 6 340 (81.3%)  | 7 796  | 0.68        | 0.62     | 0.74  |
| Other/Undisclosed                   | 111 (87.4%)    | 127    | 1.08        | 0.54     | 2.16  |
| <b>Healthcare Experience</b>        |                |        |             |          |       |
| No                                  | 14 112 (83.6%) | 16 874 |             |          |       |
| Yes                                 | 9 260 (87.3%)  | 10 603 | 1.35        | 1.23     | 1.48  |
| <b>Cognitive Health</b>             |                |        |             |          |       |
| Average or above                    | 21 983 (85.1%) | 25 824 |             |          |       |
| Below average                       | 1 389 (84.0%)  | 1 653  | 0.92        | 0.77     | 1.10  |
| <b>Mental Health</b>                |                |        |             |          |       |
| Average or above                    | 20 187 (84.6%) | 23 857 |             |          |       |
| Below average                       | 3 185 (88.0%)  | 3 620  | 1.33        | 1.16     | 1.53  |
| <b>Illness Experience</b>           |                |        |             |          |       |
| No                                  | 13 838 (84.5%) | 16 384 |             |          |       |
| Yes                                 | 9 534 (85.9%)  | 11 093 | 1.13        | 1.03     | 1.23  |
| <b>Brain Disease Caregiver</b>      |                |        |             |          |       |
| No                                  | 12 549 (85.4%) | 14 695 |             |          |       |
| Yes                                 | 10 823 (84.7%) | 12 782 | 0.94        | 0.87     | 1.03  |
| <b>Brain Research Participation</b> |                |        |             |          |       |
| No                                  | 13 571 (86.9%) | 15 608 |             |          |       |
| Yes                                 | 9 801 (82.6%)  | 11 869 | 0.71        | 0.65     | 0.78  |
| <b>Relationship</b>                 |                |        |             |          |       |
| Not stable                          | 10 479 (86.5%) | 12 112 |             |          |       |
| Stable                              | 12 893 (83.9%) | 15 365 | 0.81        | 0.74     | 0.89  |

1.9 In your opinion, does *physical health* have an influence on brain health?

Table 9: Q1 Physical health

| Variable/Subgroup                   | Descriptive    |        | Inferential |          |       |
|-------------------------------------|----------------|--------|-------------|----------|-------|
|                                     | Positive       | N      | OR          | CI (99%) |       |
|                                     |                |        |             | Lower    | Upper |
| <b>Age</b>                          |                |        |             |          |       |
| >= 61                               | 10 976 (86.6%) | 12 671 |             |          |       |
| 41-60                               | 9 068 (88.1%)  | 10 296 | 1.14        | 1.03     | 1.26  |
| <= 40                               | 3 961 (88.4%)  | 4 483  | 1.17        | 1.02     | 1.34  |
| <b>Education</b>                    |                |        |             |          |       |
| Higher                              | 16 697 (88.6%) | 18 851 |             |          |       |
| Lower                               | 7 308 (85.0%)  | 8 599  | 0.73        | 0.66     | 0.81  |
| <b>Gender</b>                       |                |        |             |          |       |
| Woman                               | 17 244 (88.3%) | 19 525 |             |          |       |
| Other/Undisclosed                   | 108 (85.0%)    | 127    | 0.75        | 0.39     | 1.43  |
| Man                                 | 6 653 (85.3%)  | 7 798  | 0.77        | 0.70     | 0.85  |
| <b>Healthcare Experience</b>        |                |        |             |          |       |
| No                                  | 14 454 (85.7%) | 16 862 |             |          |       |
| Yes                                 | 9 551 (90.2%)  | 10 588 | 1.53        | 1.39     | 1.70  |
| <b>Cognitive Health</b>             |                |        |             |          |       |
| Average or above                    | 22 682 (87.9%) | 25 802 |             |          |       |
| Below average                       | 1 323 (80.3%)  | 1 648  | 0.56        | 0.47     | 0.66  |
| <b>Mental Health</b>                |                |        |             |          |       |
| Average or above                    | 20 948 (87.9%) | 23 830 |             |          |       |
| Below average                       | 3 057 (84.4%)  | 3 620  | 0.75        | 0.66     | 0.85  |
| <b>Illness Experience</b>           |                |        |             |          |       |
| No                                  | 14 462 (88.3%) | 16 375 |             |          |       |
| Yes                                 | 9 543 (86.2%)  | 11 075 | 0.82        | 0.75     | 0.91  |
| <b>Brain Disease Caregiver</b>      |                |        |             |          |       |
| No                                  | 12 764 (86.9%) | 14 682 |             |          |       |
| Yes                                 | 11 241 (88.0%) | 12 768 | 1.11        | 1.01     | 1.22  |
| <b>Brain Research Participation</b> |                |        |             |          |       |
| No                                  | 13 592 (87.2%) | 15 588 |             |          |       |
| Yes                                 | 10 413 (87.8%) | 11 862 | 1.06        | 0.96     | 1.16  |
| <b>Relationship</b>                 |                |        |             |          |       |
| Not stable                          | 10 540 (87.0%) | 12 110 |             |          |       |
| Stable                              | 13 465 (87.8%) | 15 340 | 1.07        | 0.97     | 1.18  |



1.10 In your opinion, does *genetics* have an influence on brain health?

Table 10: Q1 Genetics

| Variable/Subgroup                   | Descriptive    |        | Inferential |          |       |
|-------------------------------------|----------------|--------|-------------|----------|-------|
|                                     | Positive       | N      | OR          | CI (99%) |       |
|                                     |                |        |             | Lower    | Upper |
| <b>Age</b>                          |                |        |             |          |       |
| >= 61                               | 10 588 (83.4%) | 12 689 |             |          |       |
| <= 40                               | 3 435 (76.6%)  | 4 487  | 0.65        | 0.58     | 0.72  |
| 41-60                               | 8 610 (83.6%)  | 10 302 | 1.01        | 0.92     | 1.11  |
| <b>Education</b>                    |                |        |             |          |       |
| Higher                              | 15 586 (82.6%) | 18 863 |             |          |       |
| Lower                               | 7 047 (81.8%)  | 8 615  | 0.94        | 0.87     | 1.03  |
| <b>Gender</b>                       |                |        |             |          |       |
| Woman                               | 16 311 (83.4%) | 19 556 |             |          |       |
| Other/Undisclosed                   | 88 (69.8%)     | 126    | 0.46        | 0.28     | 0.76  |
| Man                                 | 6 234 (80.0%)  | 7 796  | 0.79        | 0.73     | 0.87  |
| <b>Healthcare Experience</b>        |                |        |             |          |       |
| No                                  | 13 797 (81.7%) | 16 882 |             |          |       |
| Yes                                 | 8 836 (83.4%)  | 10 596 | 1.12        | 1.03     | 1.22  |
| <b>Cognitive Health</b>             |                |        |             |          |       |
| Average or above                    | 21 319 (82.5%) | 25 829 |             |          |       |
| Below average                       | 1 314 (79.7%)  | 1 649  | 0.83        | 0.70     | 0.98  |
| <b>Mental Health</b>                |                |        |             |          |       |
| Average or above                    | 19 648 (82.3%) | 23 861 |             |          |       |
| Below average                       | 2 985 (82.5%)  | 3 617  | 1.01        | 0.90     | 1.14  |
| <b>Illness Experience</b>           |                |        |             |          |       |
| No                                  | 13 446 (82.0%) | 16 390 |             |          |       |
| Yes                                 | 9 187 (82.9%)  | 11 088 | 1.06        | 0.97     | 1.15  |
| <b>Brain Disease Caregiver</b>      |                |        |             |          |       |
| No                                  | 11 717 (79.7%) | 14 693 |             |          |       |
| Yes                                 | 10 916 (85.4%) | 12 785 | 1.48        | 1.36     | 1.61  |
| <b>Brain Research Participation</b> |                |        |             |          |       |
| No                                  | 12 644 (81.0%) | 15 605 |             |          |       |
| Yes                                 | 9 989 (84.1%)  | 11 873 | 1.24        | 1.14     | 1.35  |
| <b>Relationship</b>                 |                |        |             |          |       |
| Not stable                          | 9 796 (80.9%)  | 12 115 |             |          |       |
| Stable                              | 12 837 (83.6%) | 15 363 | 1.20        | 1.11     | 1.31  |

1.11 In your opinion, does *substance use* have an influence on brain health?

Table 11: Q1 Substance use

| Variable/Subgroup                   | Descriptive    |        | Inferential |          |       |
|-------------------------------------|----------------|--------|-------------|----------|-------|
|                                     | Positive       | N      | OR          | CI (99%) |       |
|                                     |                |        |             | Lower    | Upper |
| <b>Age</b>                          |                |        |             |          |       |
| >= 61                               | 11 491 (90.5%) | 12 692 |             |          |       |
| <= 40                               | 4 179 (93.2%)  | 4 485  | 1.43        | 1.20     | 1.69  |
| 41-60                               | 9 712 (94.2%)  | 10 308 | 1.70        | 1.49     | 1.95  |
| <b>Education</b>                    |                |        |             |          |       |
| Higher                              | 17 546 (93.0%) | 18 866 |             |          |       |
| Lower                               | 7 836 (90.9%)  | 8 619  | 0.75        | 0.67     | 0.85  |
| <b>Gender</b>                       |                |        |             |          |       |
| Woman                               | 18 238 (93.3%) | 19 551 |             |          |       |
| Other/Undisclosed                   | 109 (85.8%)    | 127    | 0.44        | 0.23     | 0.84  |
| Man                                 | 7 035 (90.1%)  | 7 807  | 0.66        | 0.58     | 0.74  |
| <b>Healthcare Experience</b>        |                |        |             |          |       |
| No                                  | 15 416 (91.3%) | 16 886 |             |          |       |
| Yes                                 | 9 966 (94.0%)  | 10 599 | 1.50        | 1.32     | 1.70  |
| <b>Cognitive Health</b>             |                |        |             |          |       |
| Average or above                    | 23 942 (92.7%) | 25 832 |             |          |       |
| Below average                       | 1 440 (87.1%)  | 1 653  | 0.53        | 0.44     | 0.65  |
| <b>Mental Health</b>                |                |        |             |          |       |
| Average or above                    | 22 069 (92.5%) | 23 866 |             |          |       |
| Below average                       | 3 313 (91.5%)  | 3 619  | 0.88        | 0.75     | 1.04  |
| <b>Illness Experience</b>           |                |        |             |          |       |
| No                                  | 15 240 (93.0%) | 16 395 |             |          |       |
| Yes                                 | 10 142 (91.5%) | 11 090 | 0.81        | 0.72     | 0.91  |
| <b>Brain Disease Caregiver</b>      |                |        |             |          |       |
| No                                  | 13 525 (92.0%) | 14 709 |             |          |       |
| Yes                                 | 11 857 (92.8%) | 12 776 | 1.13        | 1.00     | 1.27  |
| <b>Brain Research Participation</b> |                |        |             |          |       |
| No                                  | 14 422 (92.3%) | 15 619 |             |          |       |
| Yes                                 | 10 960 (92.4%) | 11 866 | 1.00        | 0.89     | 1.13  |
| <b>Relationship</b>                 |                |        |             |          |       |
| Not stable                          | 11 151 (92.0%) | 12 117 |             |          |       |
| Stable                              | 14 231 (92.6%) | 15 368 | 1.08        | 0.96     | 1.22  |

## 2 Question 2

### 2.1 In your opinion, is it important to look after one's brain in *in the womb*?

Table 12: Q2 In the womb

| Variable/Subgroup                   | Descriptive    |        | Inferential |          |       |
|-------------------------------------|----------------|--------|-------------|----------|-------|
|                                     | Positive       | N      | OR          | CI (99%) |       |
|                                     |                |        |             | Lower    | Upper |
| <b>Age</b>                          |                |        |             |          |       |
| >= 61                               | 10 109 (80.7%) | 12 520 |             |          |       |
| <= 40                               | 3 851 (86.1%)  | 4 471  | 1.48        | 1.31     | 1.68  |
| 41-60                               | 8 852 (86.2%)  | 10 268 | 1.49        | 1.36     | 1.64  |
| <b>Education</b>                    |                |        |             |          |       |
| Higher                              | 16 121 (86.0%) | 18 739 |             |          |       |
| Lower                               | 6 691 (78.5%)  | 8 520  | 0.59        | 0.54     | 0.65  |
| <b>Gender</b>                       |                |        |             |          |       |
| Woman                               | 16 698 (85.9%) | 19 433 |             |          |       |
| Man                                 | 6 006 (78.0%)  | 7 701  | 0.58        | 0.53     | 0.63  |
| Other/Undisclosed                   | 108 (86.4%)    | 125    | 1.04        | 0.53     | 2.04  |
| <b>Healthcare Experience</b>        |                |        |             |          |       |
| No                                  | 13 464 (80.5%) | 16 727 |             |          |       |
| Yes                                 | 9 348 (88.8%)  | 10 532 | 1.91        | 1.74     | 2.10  |
| <b>Cognitive Health</b>             |                |        |             |          |       |
| Average or above                    | 21 570 (84.2%) | 25 627 |             |          |       |
| Below average                       | 1 242 (76.1%)  | 1 632  | 0.60        | 0.51     | 0.70  |
| <b>Mental Health</b>                |                |        |             |          |       |
| Average or above                    | 19 867 (83.9%) | 23 666 |             |          |       |
| Below average                       | 2 945 (82.0%)  | 3 593  | 0.87        | 0.77     | 0.98  |
| <b>Illness Experience</b>           |                |        |             |          |       |
| No                                  | 13 636 (83.8%) | 16 271 |             |          |       |
| Yes                                 | 9 176 (83.5%)  | 10 988 | 0.98        | 0.90     | 1.07  |
| <b>Brain Disease Caregiver</b>      |                |        |             |          |       |
| No                                  | 11 975 (82.1%) | 14 577 |             |          |       |
| Yes                                 | 10 837 (85.5%) | 12 682 | 1.28        | 1.17     | 1.39  |
| <b>Brain Research Participation</b> |                |        |             |          |       |
| No                                  | 12 988 (83.9%) | 15 482 |             |          |       |
| Yes                                 | 9 824 (83.4%)  | 11 777 | 0.97        | 0.89     | 1.05  |
| <b>Relationship</b>                 |                |        |             |          |       |
| Not stable                          | 10 008 (83.2%) | 12 027 |             |          |       |
| Stable                              | 12 804 (84.1%) | 15 232 | 1.06        | 0.98     | 1.16  |

## 2.2 In your opinion, is it important to look after one's brain in *childhood*?

Table 13: Q2 Childhood

| Variable/Subgroup                   | Descriptive    |        | Inferential |          |       |
|-------------------------------------|----------------|--------|-------------|----------|-------|
|                                     | Positive       | N      | OR          | CI (99%) |       |
|                                     |                |        |             | Lower    | Upper |
| <b>Age</b>                          |                |        |             |          |       |
| >= 61                               | 11 791 (93.4%) | 12 626 |             |          |       |
| 41-60                               | 9 902 (96.2%)  | 10 297 | 1.78        | 1.51     | 2.09  |
| <= 40                               | 4 322 (96.4%)  | 4 484  | 1.89        | 1.51     | 2.37  |
| <b>Education</b>                    |                |        |             |          |       |
| Higher                              | 18 042 (95.8%) | 18 828 |             |          |       |
| Lower                               | 7 973 (92.9%)  | 8 579  | 0.57        | 0.50     | 0.66  |
| <b>Gender</b>                       |                |        |             |          |       |
| Woman                               | 18 679 (95.7%) | 19 518 |             |          |       |
| Man                                 | 7 217 (93.0%)  | 7 764  | 0.59        | 0.51     | 0.69  |
| Other/Undisclosed                   | 119 (95.2%)    | 125    | 0.89        | 0.30     | 2.63  |
| <b>Healthcare Experience</b>        |                |        |             |          |       |
| No                                  | 15 773 (93.7%) | 16 831 |             |          |       |
| Yes                                 | 10 242 (96.8%) | 10 576 | 2.06        | 1.74     | 2.43  |
| <b>Cognitive Health</b>             |                |        |             |          |       |
| Average or above                    | 24 506 (95.1%) | 25 760 |             |          |       |
| Below average                       | 1 509 (91.6%)  | 1 647  | 0.56        | 0.44     | 0.71  |
| <b>Mental Health</b>                |                |        |             |          |       |
| Average or above                    | 22 594 (94.9%) | 23 797 |             |          |       |
| Below average                       | 3 421 (94.8%)  | 3 610  | 0.96        | 0.78     | 1.19  |
| <b>Illness Experience</b>           |                |        |             |          |       |
| No                                  | 15 544 (95.1%) | 16 348 |             |          |       |
| Yes                                 | 10 471 (94.7%) | 11 059 | 0.92        | 0.80     | 1.06  |
| <b>Brain Disease Caregiver</b>      |                |        |             |          |       |
| No                                  | 13 912 (94.9%) | 14 662 |             |          |       |
| Yes                                 | 12 103 (95.0%) | 12 745 | 1.02        | 0.88     | 1.17  |
| <b>Brain Research Participation</b> |                |        |             |          |       |
| No                                  | 14 798 (95.1%) | 15 565 |             |          |       |
| Yes                                 | 11 217 (94.7%) | 11 842 | 0.93        | 0.81     | 1.07  |
| <b>Relationship</b>                 |                |        |             |          |       |
| Not stable                          | 11 503 (95.2%) | 12 085 |             |          |       |
| Stable                              | 14 512 (94.7%) | 15 322 | 0.91        | 0.79     | 1.05  |

## 2.3 In your opinion, is it important to look after one's brain in *adolescence*?

Table 14: Q2 Adolescence

| Variable/Subgroup                   | Descriptive    |        | Inferential |          |       |
|-------------------------------------|----------------|--------|-------------|----------|-------|
|                                     | Positive       | N      | OR          | CI (99%) |       |
|                                     |                |        |             | Lower    | Upper |
| <b>Age</b>                          |                |        |             |          |       |
| >= 61                               | 12 074 (95.5%) | 12 639 |             |          |       |
| 41-60                               | 10 019 (97.3%) | 10 293 | 1.71        | 1.41     | 2.08  |
| <= 40                               | 4 383 (97.9%)  | 4 479  | 2.14        | 1.60     | 2.85  |
| <b>Education</b>                    |                |        |             |          |       |
| Higher                              | 18 268 (97.0%) | 18 827 |             |          |       |
| Lower                               | 8 208 (95.6%)  | 8 584  | 0.67        | 0.56     | 0.80  |
| <b>Gender</b>                       |                |        |             |          |       |
| Woman                               | 18 923 (97.0%) | 19 512 |             |          |       |
| Man                                 | 7 433 (95.6%)  | 7 774  | 0.68        | 0.57     | 0.81  |
| Other/Undisclosed                   | 120 (96.0%)    | 125    | 0.75        | 0.23     | 2.44  |
| <b>Healthcare Experience</b>        |                |        |             |          |       |
| No                                  | 16 146 (95.9%) | 16 835 |             |          |       |
| Yes                                 | 10 330 (97.7%) | 10 576 | 1.79        | 1.48     | 2.18  |
| <b>Cognitive Health</b>             |                |        |             |          |       |
| Average or above                    | 24 934 (96.8%) | 25 766 |             |          |       |
| Below average                       | 1 542 (93.7%)  | 1 645  | 0.50        | 0.38     | 0.66  |
| <b>Mental Health</b>                |                |        |             |          |       |
| Average or above                    | 22 998 (96.6%) | 23 798 |             |          |       |
| Below average                       | 3 478 (96.3%)  | 3 613  | 0.90        | 0.70     | 1.14  |
| <b>Illness Experience</b>           |                |        |             |          |       |
| No                                  | 15 795 (96.6%) | 16 351 |             |          |       |
| Yes                                 | 10 681 (96.6%) | 11 060 | 0.99        | 0.83     | 1.18  |
| <b>Brain Disease Caregiver</b>      |                |        |             |          |       |
| No                                  | 14 168 (96.6%) | 14 668 |             |          |       |
| Yes                                 | 12 308 (96.6%) | 12 743 | 1.00        | 0.84     | 1.19  |
| <b>Brain Research Participation</b> |                |        |             |          |       |
| No                                  | 15 050 (96.7%) | 15 571 |             |          |       |
| Yes                                 | 11 426 (96.5%) | 11 840 | 0.96        | 0.80     | 1.14  |
| <b>Relationship</b>                 |                |        |             |          |       |
| Not stable                          | 11 704 (96.8%) | 12 087 |             |          |       |
| Stable                              | 14 772 (96.4%) | 15 324 | 0.88        | 0.74     | 1.04  |

## 2.4 In your opinion, is it important to look after one's brain in *young adulthood*?

Table 15: Q2 Young adulthood

| Variable/Subgroup                   | Descriptive    |        | Inferential |          |       |
|-------------------------------------|----------------|--------|-------------|----------|-------|
|                                     | Positive       | N      | OR          | CI (99%) |       |
|                                     |                |        |             | Lower    | Upper |
| <b>Age</b>                          |                |        |             |          |       |
| >= 61                               | 11 941 (94.5%) | 12 631 |             |          |       |
| <= 40                               | 4 276 (95.4%)  | 4 480  | 1.21        | 0.98     | 1.50  |
| 41-60                               | 9 925 (96.5%)  | 10 286 | 1.59        | 1.34     | 1.89  |
| <b>Education</b>                    |                |        |             |          |       |
| Higher                              | 17 946 (95.3%) | 18 822 |             |          |       |
| Lower                               | 8 196 (95.6%)  | 8 575  | 1.06        | 0.90     | 1.24  |
| <b>Gender</b>                       |                |        |             |          |       |
| Woman                               | 18 769 (96.2%) | 19 505 |             |          |       |
| Other/Undisclosed                   | 116 (92.8%)    | 125    | 0.51        | 0.21     | 1.24  |
| Man                                 | 7 257 (93.4%)  | 7 767  | 0.56        | 0.48     | 0.65  |
| <b>Healthcare Experience</b>        |                |        |             |          |       |
| No                                  | 15 927 (94.7%) | 16 823 |             |          |       |
| Yes                                 | 10 215 (96.6%) | 10 574 | 1.60        | 1.36     | 1.89  |
| <b>Cognitive Health</b>             |                |        |             |          |       |
| Average or above                    | 24 608 (95.6%) | 25 754 |             |          |       |
| Below average                       | 1 534 (93.4%)  | 1 643  | 0.66        | 0.50     | 0.86  |
| <b>Mental Health</b>                |                |        |             |          |       |
| Average or above                    | 22 725 (95.5%) | 23 787 |             |          |       |
| Below average                       | 3 417 (94.7%)  | 3 610  | 0.83        | 0.67     | 1.02  |
| <b>Illness Experience</b>           |                |        |             |          |       |
| No                                  | 15 563 (95.2%) | 16 347 |             |          |       |
| Yes                                 | 10 579 (95.7%) | 11 050 | 1.13        | 0.97     | 1.32  |
| <b>Brain Disease Caregiver</b>      |                |        |             |          |       |
| No                                  | 13 920 (95.0%) | 14 654 |             |          |       |
| Yes                                 | 12 222 (95.9%) | 12 743 | 1.24        | 1.06     | 1.44  |
| <b>Brain Research Participation</b> |                |        |             |          |       |
| No                                  | 14 847 (95.5%) | 15 546 |             |          |       |
| Yes                                 | 11 295 (95.3%) | 11 851 | 0.96        | 0.82     | 1.11  |
| <b>Relationship</b>                 |                |        |             |          |       |
| Not stable                          | 11 511 (95.3%) | 12 085 |             |          |       |
| Stable                              | 14 631 (95.6%) | 15 312 | 1.07        | 0.92     | 1.24  |

## 2.5 In your opinion, is it important to look after one's brain in *middle age*?

Table 16: Q2 Middle age

| Variable/Subgroup                   | Descriptive    |        | Inferential |          |       |
|-------------------------------------|----------------|--------|-------------|----------|-------|
|                                     | Positive       | N      | OR          | CI (99%) |       |
|                                     |                |        |             | Lower    | Upper |
| <b>Age</b>                          |                |        |             |          |       |
| >= 61                               | 12 064 (95.3%) | 12 659 |             |          |       |
| <= 40                               | 4 224 (94.3%)  | 4 478  | 0.82        | 0.67     | 1.00  |
| 41-60                               | 10 004 (97.2%) | 10 297 | 1.68        | 1.40     | 2.03  |
| <b>Education</b>                    |                |        |             |          |       |
| Higher                              | 18 078 (95.9%) | 18 844 |             |          |       |
| Lower                               | 8 214 (95.6%)  | 8 590  | 0.93        | 0.78     | 1.09  |
| <b>Gender</b>                       |                |        |             |          |       |
| Woman                               | 18 951 (97.0%) | 19 536 |             |          |       |
| Other/Undisclosed                   | 111 (88.8%)    | 125    | 0.24        | 0.12     | 0.51  |
| Man                                 | 7 230 (93.0%)  | 7 773  | 0.41        | 0.35     | 0.48  |
| <b>Healthcare Experience</b>        |                |        |             |          |       |
| No                                  | 16 036 (95.2%) | 16 842 |             |          |       |
| Yes                                 | 10 256 (96.8%) | 10 592 | 1.53        | 1.29     | 1.82  |
| <b>Cognitive Health</b>             |                |        |             |          |       |
| Average or above                    | 24 746 (96.0%) | 25 788 |             |          |       |
| Below average                       | 1 546 (93.9%)  | 1 646  | 0.65        | 0.49     | 0.86  |
| <b>Mental Health</b>                |                |        |             |          |       |
| Average or above                    | 22 877 (96.0%) | 23 818 |             |          |       |
| Below average                       | 3 415 (94.4%)  | 3 616  | 0.70        | 0.57     | 0.86  |
| <b>Illness Experience</b>           |                |        |             |          |       |
| No                                  | 15 651 (95.6%) | 16 365 |             |          |       |
| Yes                                 | 10 641 (96.1%) | 11 069 | 1.13        | 0.97     | 1.33  |
| <b>Brain Disease Caregiver</b>      |                |        |             |          |       |
| No                                  | 13 943 (95.1%) | 14 668 |             |          |       |
| Yes                                 | 12 349 (96.7%) | 12 766 | 1.54        | 1.31     | 1.81  |
| <b>Brain Research Participation</b> |                |        |             |          |       |
| No                                  | 14 907 (95.8%) | 15 567 |             |          |       |
| Yes                                 | 11 385 (95.9%) | 11 867 | 1.05        | 0.89     | 1.22  |
| <b>Relationship</b>                 |                |        |             |          |       |
| Not stable                          | 11 564 (95.6%) | 12 097 |             |          |       |
| Stable                              | 14 728 (96.0%) | 15 337 | 1.11        | 0.95     | 1.30  |

2.6 In your opinion, is it important to look after one's brain in *old age*?

Table 17: Q2 Old age

| Variable/Subgroup                   | Descriptive    |        | Inferential |          |       |
|-------------------------------------|----------------|--------|-------------|----------|-------|
|                                     | Positive       | N      | OR          | CI (99%) |       |
|                                     |                |        |             | Lower    | Upper |
| <b>Age</b>                          |                |        |             |          |       |
| >= 61                               | 12 193 (96.2%) | 12 675 |             |          |       |
| <= 40                               | 4 181 (93.3%)  | 4 482  | 0.55        | 0.45     | 0.67  |
| 41-60                               | 9 962 (96.8%)  | 10 294 | 1.19        | 0.98     | 1.43  |
| <b>Education</b>                    |                |        |             |          |       |
| Higher                              | 18 140 (96.2%) | 18 851 |             |          |       |
| Lower                               | 8 196 (95.3%)  | 8 600  | 0.80        | 0.67     | 0.94  |
| <b>Gender</b>                       |                |        |             |          |       |
| Woman                               | 18 970 (97.1%) | 19 545 |             |          |       |
| Other/Undisclosed                   | 115 (92.0%)    | 125    | 0.35        | 0.15     | 0.82  |
| Man                                 | 7 251 (93.2%)  | 7 781  | 0.41        | 0.35     | 0.49  |
| <b>Healthcare Experience</b>        |                |        |             |          |       |
| No                                  | 16 092 (95.4%) | 16 861 |             |          |       |
| Yes                                 | 10 244 (96.7%) | 10 590 | 1.41        | 1.19     | 1.68  |
| <b>Cognitive Health</b>             |                |        |             |          |       |
| Average or above                    | 24 789 (96.1%) | 25 807 |             |          |       |
| Below average                       | 1 547 (94.1%)  | 1 644  | 0.65        | 0.49     | 0.87  |
| <b>Mental Health</b>                |                |        |             |          |       |
| Average or above                    | 22 930 (96.2%) | 23 838 |             |          |       |
| Below average                       | 3 406 (94.3%)  | 3 613  | 0.65        | 0.53     | 0.80  |
| <b>Illness Experience</b>           |                |        |             |          |       |
| No                                  | 15 691 (95.8%) | 16 382 |             |          |       |
| Yes                                 | 10 645 (96.2%) | 11 069 | 1.11        | 0.94     | 1.30  |
| <b>Brain Disease Caregiver</b>      |                |        |             |          |       |
| No                                  | 13 994 (95.3%) | 14 680 |             |          |       |
| Yes                                 | 12 342 (96.6%) | 12 771 | 1.41        | 1.20     | 1.66  |
| <b>Brain Research Participation</b> |                |        |             |          |       |
| No                                  | 14 899 (95.6%) | 15 580 |             |          |       |
| Yes                                 | 11 437 (96.3%) | 11 871 | 1.20        | 1.02     | 1.42  |
| <b>Relationship</b>                 |                |        |             |          |       |
| Not stable                          | 11 564 (95.5%) | 12 106 |             |          |       |
| Stable                              | 14 772 (96.3%) | 15 345 | 1.21        | 1.03     | 1.41  |



### 3 Question 3

#### 3.1 I associate *alzheimer's* with the brain.

Table 18: Q3 Alzheimer's

| Variable/Subgroup                   | Descriptive    |        | Inferential |          |       |
|-------------------------------------|----------------|--------|-------------|----------|-------|
|                                     | Positive       | N      | OR          | CI (99%) |       |
|                                     |                |        |             | Lower    | Upper |
| <b>Age</b>                          |                |        |             |          |       |
| >= 61                               | 12 649 (99.3%) | 12 737 |             |          |       |
| <= 40                               | 4 391 (98.0%)  | 4 479  | 0.35        | 0.23     | 0.51  |
| 41-60                               | 10 248 (99.4%) | 10 314 | 1.08        | 0.71     | 1.65  |
| <b>Education</b>                    |                |        |             |          |       |
| Higher                              | 18 765 (99.3%) | 18 889 |             |          |       |
| Lower                               | 8 523 (98.6%)  | 8 641  | 0.48        | 0.34     | 0.67  |
| <b>Gender</b>                       |                |        |             |          |       |
| Woman                               | 19 467 (99.4%) | 19 589 |             |          |       |
| Man                                 | 7 695 (98.5%)  | 7 815  | 0.40        | 0.29     | 0.56  |
| Other/Undisclosed                   | 126 (100.0%)   | 126    |             |          |       |
| <b>Healthcare Experience</b>        |                |        |             |          |       |
| No                                  | 16 723 (98.9%) | 16 914 |             |          |       |
| Yes                                 | 10 565 (99.5%) | 10 616 | 2.37        | 1.57     | 3.56  |
| <b>Cognitive Health</b>             |                |        |             |          |       |
| Average or above                    | 25 654 (99.1%) | 25 876 |             |          |       |
| Below average                       | 1 634 (98.8%)  | 1 654  | 0.71        | 0.39     | 1.30  |
| <b>Mental Health</b>                |                |        |             |          |       |
| Average or above                    | 23 713 (99.2%) | 23 909 |             |          |       |
| Below average                       | 3 575 (98.7%)  | 3 621  | 0.64        | 0.42     | 0.98  |
| <b>Illness Experience</b>           |                |        |             |          |       |
| No                                  | 16 287 (99.3%) | 16 409 |             |          |       |
| Yes                                 | 11 001 (98.9%) | 11 121 | 0.69        | 0.49     | 0.96  |
| <b>Brain Disease Caregiver</b>      |                |        |             |          |       |
| No                                  | 14 545 (98.8%) | 14 721 |             |          |       |
| Yes                                 | 12 743 (99.5%) | 12 809 | 2.34        | 1.61     | 3.39  |
| <b>Brain Research Participation</b> |                |        |             |          |       |
| No                                  | 15 453 (98.9%) | 15 632 |             |          |       |
| Yes                                 | 11 835 (99.5%) | 11 898 | 2.18        | 1.49     | 3.18  |
| <b>Relationship</b>                 |                |        |             |          |       |
| Not stable                          | 11 992 (98.8%) | 12 137 |             |          |       |
| Stable                              | 15 296 (99.4%) | 15 393 | 1.91        | 1.36     | 2.68  |

### 3.2 I associate *schizophrenia* with the brain.

Table 19: Q3 Schizophrenia

| Variable/Subgroup                   | Descriptive    |        | Inferential |          |       |
|-------------------------------------|----------------|--------|-------------|----------|-------|
|                                     | Positive       | N      | OR          | CI (99%) |       |
|                                     |                |        |             | Lower    | Upper |
| <b>Age</b>                          |                |        |             |          |       |
| >= 61                               | 12 119 (95.1%) | 12 737 |             |          |       |
| <= 40                               | 4 315 (96.3%)  | 4 479  | 1.34        | 1.06     | 1.69  |
| 41-60                               | 9 968 (96.6%)  | 10 314 | 1.47        | 1.23     | 1.75  |
| <b>Education</b>                    |                |        |             |          |       |
| Higher                              | 18 235 (96.5%) | 18 889 |             |          |       |
| Lower                               | 8 167 (94.5%)  | 8 641  | 0.62        | 0.53     | 0.72  |
| <b>Gender</b>                       |                |        |             |          |       |
| Woman                               | 18 893 (96.4%) | 19 589 |             |          |       |
| Man                                 | 7 389 (94.5%)  | 7 815  | 0.64        | 0.54     | 0.75  |
| Other/Undisclosed                   | 120 (95.2%)    | 126    | 0.74        | 0.25     | 2.18  |
| <b>Healthcare Experience</b>        |                |        |             |          |       |
| No                                  | 16 119 (95.3%) | 16 914 |             |          |       |
| Yes                                 | 10 283 (96.9%) | 10 616 | 1.52        | 1.28     | 1.81  |
| <b>Cognitive Health</b>             |                |        |             |          |       |
| Average or above                    | 24 876 (96.1%) | 25 876 |             |          |       |
| Below average                       | 1 526 (92.3%)  | 1 654  | 0.48        | 0.37     | 0.62  |
| <b>Mental Health</b>                |                |        |             |          |       |
| Average or above                    | 22 929 (95.9%) | 23 909 |             |          |       |
| Below average                       | 3 473 (95.9%)  | 3 621  | 1.00        | 0.80     | 1.27  |
| <b>Illness Experience</b>           |                |        |             |          |       |
| No                                  | 15 781 (96.2%) | 16 409 |             |          |       |
| Yes                                 | 10 621 (95.5%) | 11 121 | 0.85        | 0.72     | 0.99  |
| <b>Brain Disease Caregiver</b>      |                |        |             |          |       |
| No                                  | 14 059 (95.5%) | 14 721 |             |          |       |
| Yes                                 | 12 343 (96.4%) | 12 809 | 1.25        | 1.06     | 1.46  |
| <b>Brain Research Participation</b> |                |        |             |          |       |
| No                                  | 14 906 (95.4%) | 15 632 |             |          |       |
| Yes                                 | 11 496 (96.6%) | 11 898 | 1.39        | 1.18     | 1.64  |
| <b>Relationship</b>                 |                |        |             |          |       |
| Not stable                          | 11 651 (96.0%) | 12 137 |             |          |       |
| Stable                              | 14 751 (95.8%) | 15 393 | 0.96        | 0.82     | 1.12  |

### 3.3 I associate *depression* with the brain.

Table 20: Q3 Depression

| Variable/Subgroup                   | Descriptive    |        | Inferential |          |       |
|-------------------------------------|----------------|--------|-------------|----------|-------|
|                                     | Positive       | N      | OR          | CI (99%) |       |
|                                     |                |        |             | Lower    | Upper |
| <b>Age</b>                          |                |        |             |          |       |
| >= 61                               | 11 998 (94.2%) | 12 737 |             |          |       |
| <= 40                               | 4 275 (95.4%)  | 4 479  | 1.29        | 1.05     | 1.59  |
| 41-60                               | 9 911 (96.1%)  | 10 314 | 1.51        | 1.29     | 1.78  |
| <b>Education</b>                    |                |        |             |          |       |
| Higher                              | 18 060 (95.6%) | 18 889 |             |          |       |
| Lower                               | 8 124 (94.0%)  | 8 641  | 0.72        | 0.62     | 0.84  |
| <b>Gender</b>                       |                |        |             |          |       |
| Woman                               | 18 731 (95.6%) | 19 589 |             |          |       |
| Man                                 | 7 332 (93.8%)  | 7 815  | 0.70        | 0.60     | 0.81  |
| Other/Undisclosed                   | 121 (96.0%)    | 126    | 1.11        | 0.34     | 3.61  |
| <b>Healthcare Experience</b>        |                |        |             |          |       |
| No                                  | 15 993 (94.6%) | 16 914 |             |          |       |
| Yes                                 | 10 191 (96.0%) | 10 616 | 1.38        | 1.18     | 1.61  |
| <b>Cognitive Health</b>             |                |        |             |          |       |
| Average or above                    | 24 636 (95.2%) | 25 876 |             |          |       |
| Below average                       | 1 548 (93.6%)  | 1 654  | 0.74        | 0.56     | 0.96  |
| <b>Mental Health</b>                |                |        |             |          |       |
| Average or above                    | 22 696 (94.9%) | 23 909 |             |          |       |
| Below average                       | 3 488 (96.3%)  | 3 621  | 1.40        | 1.10     | 1.78  |
| <b>Illness Experience</b>           |                |        |             |          |       |
| No                                  | 15 607 (95.1%) | 16 409 |             |          |       |
| Yes                                 | 10 577 (95.1%) | 11 121 | 1.00        | 0.86     | 1.16  |
| <b>Brain Disease Caregiver</b>      |                |        |             |          |       |
| No                                  | 13 929 (94.6%) | 14 721 |             |          |       |
| Yes                                 | 12 255 (95.7%) | 12 809 | 1.26        | 1.09     | 1.46  |
| <b>Brain Research Participation</b> |                |        |             |          |       |
| No                                  | 14 770 (94.5%) | 15 632 |             |          |       |
| Yes                                 | 11 414 (95.9%) | 11 898 | 1.38        | 1.18     | 1.60  |
| <b>Relationship</b>                 |                |        |             |          |       |
| Not stable                          | 11 549 (95.2%) | 12 137 |             |          |       |
| Stable                              | 14 635 (95.1%) | 15 393 | 0.98        | 0.85     | 1.14  |

### 3.4 I associate *bipolar* with the brain.

Table 21: Q3 Bipolar

| Variable/Subgroup                   | Descriptive    |        | Inferential |          |       |
|-------------------------------------|----------------|--------|-------------|----------|-------|
|                                     | Positive       | N      | OR          | CI (99%) |       |
|                                     |                |        |             | Lower    | Upper |
| <b>Age</b>                          |                |        |             |          |       |
| >= 61                               | 11 321 (88.9%) | 12 737 |             |          |       |
| <= 40                               | 4 202 (93.8%)  | 4 479  | 1.90        | 1.59     | 2.26  |
| 41-60                               | 9 753 (94.6%)  | 10 314 | 2.17        | 1.90     | 2.49  |
| <b>Education</b>                    |                |        |             |          |       |
| Higher                              | 17 762 (94.0%) | 18 889 |             |          |       |
| Lower                               | 7 514 (87.0%)  | 8 641  | 0.42        | 0.38     | 0.47  |
| <b>Gender</b>                       |                |        |             |          |       |
| Woman                               | 18 332 (93.6%) | 19 589 |             |          |       |
| Man                                 | 6 826 (87.3%)  | 7 815  | 0.47        | 0.42     | 0.53  |
| Other/Undisclosed                   | 118 (93.7%)    | 126    | 1.01        | 0.39     | 2.60  |
| <b>Healthcare Experience</b>        |                |        |             |          |       |
| No                                  | 15 219 (90.0%) | 16 914 |             |          |       |
| Yes                                 | 10 057 (94.7%) | 10 616 | 2.00        | 1.76     | 2.28  |
| <b>Cognitive Health</b>             |                |        |             |          |       |
| Average or above                    | 23 826 (92.1%) | 25 876 |             |          |       |
| Below average                       | 1 450 (87.7%)  | 1 654  | 0.61        | 0.50     | 0.75  |
| <b>Mental Health</b>                |                |        |             |          |       |
| Average or above                    | 21 896 (91.6%) | 23 909 |             |          |       |
| Below average                       | 3 380 (93.3%)  | 3 621  | 1.29        | 1.07     | 1.55  |
| <b>Illness Experience</b>           |                |        |             |          |       |
| No                                  | 15 072 (91.9%) | 16 409 |             |          |       |
| Yes                                 | 10 204 (91.8%) | 11 121 | 0.99        | 0.88     | 1.11  |
| <b>Brain Disease Caregiver</b>      |                |        |             |          |       |
| No                                  | 13 311 (90.4%) | 14 721 |             |          |       |
| Yes                                 | 11 965 (93.4%) | 12 809 | 1.50        | 1.34     | 1.69  |
| <b>Brain Research Participation</b> |                |        |             |          |       |
| No                                  | 14 149 (90.5%) | 15 632 |             |          |       |
| Yes                                 | 11 127 (93.5%) | 11 898 | 1.51        | 1.34     | 1.70  |
| <b>Relationship</b>                 |                |        |             |          |       |
| Not stable                          | 11 232 (92.5%) | 12 137 |             |          |       |
| Stable                              | 14 044 (91.2%) | 15 393 | 0.84        | 0.75     | 0.94  |

### 3.5 I associate *anxiety* with the brain.

Table 22: Q3 Anxiety

| Variable/Subgroup                   | Descriptive    |        | Inferential |          |       |
|-------------------------------------|----------------|--------|-------------|----------|-------|
|                                     | Positive       | N      | OR          | CI (99%) |       |
|                                     |                |        |             | Lower    | Upper |
| <b>Age</b>                          |                |        |             |          |       |
| >= 61                               | 11 336 (89.0%) | 12 737 |             |          |       |
| <= 40                               | 4 126 (92.1%)  | 4 479  | 1.44        | 1.23     | 1.70  |
| 41-60                               | 9 550 (92.6%)  | 10 314 | 1.54        | 1.37     | 1.74  |
| <b>Education</b>                    |                |        |             |          |       |
| Higher                              | 17 310 (91.6%) | 18 889 |             |          |       |
| Lower                               | 7 702 (89.1%)  | 8 641  | 0.75        | 0.67     | 0.84  |
| <b>Gender</b>                       |                |        |             |          |       |
| Woman                               | 17 905 (91.4%) | 19 589 |             |          |       |
| Man                                 | 6 987 (89.4%)  | 7 815  | 0.79        | 0.71     | 0.89  |
| Other/Undisclosed                   | 120 (95.2%)    | 126    | 1.88        | 0.64     | 5.55  |
| <b>Healthcare Experience</b>        |                |        |             |          |       |
| No                                  | 15 250 (90.2%) | 16 914 |             |          |       |
| Yes                                 | 9 762 (92.0%)  | 10 616 | 1.25        | 1.11     | 1.40  |
| <b>Cognitive Health</b>             |                |        |             |          |       |
| Average or above                    | 23 536 (91.0%) | 25 876 |             |          |       |
| Below average                       | 1 476 (89.2%)  | 1 654  | 0.82        | 0.67     | 1.02  |
| <b>Mental Health</b>                |                |        |             |          |       |
| Average or above                    | 21 627 (90.5%) | 23 909 |             |          |       |
| Below average                       | 3 385 (93.5%)  | 3 621  | 1.51        | 1.26     | 1.82  |
| <b>Illness Experience</b>           |                |        |             |          |       |
| No                                  | 14 870 (90.6%) | 16 409 |             |          |       |
| Yes                                 | 10 142 (91.2%) | 11 121 | 1.07        | 0.96     | 1.20  |
| <b>Brain Disease Caregiver</b>      |                |        |             |          |       |
| No                                  | 13 266 (90.1%) | 14 721 |             |          |       |
| Yes                                 | 11 746 (91.7%) | 12 809 | 1.21        | 1.09     | 1.35  |
| <b>Brain Research Participation</b> |                |        |             |          |       |
| No                                  | 14 048 (89.9%) | 15 632 |             |          |       |
| Yes                                 | 10 964 (92.1%) | 11 898 | 1.32        | 1.18     | 1.48  |
| <b>Relationship</b>                 |                |        |             |          |       |
| Not stable                          | 11 027 (90.9%) | 12 137 |             |          |       |
| Stable                              | 13 985 (90.9%) | 15 393 | 1.00        | 0.90     | 1.11  |

3.6 I associate *addiction* with the brain.

Table 23: Q3 Addiction

| Variable/Subgroup                   | Descriptive    |        | Inferential |          |       |
|-------------------------------------|----------------|--------|-------------|----------|-------|
|                                     | Positive       | N      | OR          | CI (99%) |       |
|                                     |                |        |             | Lower    | Upper |
| <b>Age</b>                          |                |        |             |          |       |
| >= 61                               | 11 025 (86.6%) | 12 737 |             |          |       |
| 41-60                               | 9 263 (89.8%)  | 10 314 | 1.37        | 1.23     | 1.52  |
| <= 40                               | 4 059 (90.6%)  | 4 479  | 1.50        | 1.29     | 1.74  |
| <b>Education</b>                    |                |        |             |          |       |
| Higher                              | 17 005 (90.0%) | 18 889 |             |          |       |
| Lower                               | 7 342 (85.0%)  | 8 641  | 0.63        | 0.57     | 0.69  |
| <b>Gender</b>                       |                |        |             |          |       |
| Woman                               | 17 634 (90.0%) | 19 589 |             |          |       |
| Man                                 | 6 599 (84.4%)  | 7 815  | 0.60        | 0.54     | 0.67  |
| Other/Undisclosed                   | 114 (90.5%)    | 126    | 1.05        | 0.48     | 2.31  |
| <b>Healthcare Experience</b>        |                |        |             |          |       |
| No                                  | 14 542 (86.0%) | 16 914 |             |          |       |
| Yes                                 | 9 805 (92.4%)  | 10 616 | 1.97        | 1.77     | 2.20  |
| <b>Cognitive Health</b>             |                |        |             |          |       |
| Average or above                    | 22 952 (88.7%) | 25 876 |             |          |       |
| Below average                       | 1 395 (84.3%)  | 1 654  | 0.69        | 0.57     | 0.82  |
| <b>Mental Health</b>                |                |        |             |          |       |
| Average or above                    | 21 109 (88.3%) | 23 909 |             |          |       |
| Below average                       | 3 238 (89.4%)  | 3 621  | 1.12        | 0.97     | 1.30  |
| <b>Illness Experience</b>           |                |        |             |          |       |
| No                                  | 14 492 (88.3%) | 16 409 |             |          |       |
| Yes                                 | 9 855 (88.6%)  | 11 121 | 1.03        | 0.93     | 1.14  |
| <b>Brain Disease Caregiver</b>      |                |        |             |          |       |
| No                                  | 12 859 (87.4%) | 14 721 |             |          |       |
| Yes                                 | 11 488 (89.7%) | 12 809 | 1.26        | 1.14     | 1.39  |
| <b>Brain Research Participation</b> |                |        |             |          |       |
| No                                  | 13 645 (87.3%) | 15 632 |             |          |       |
| Yes                                 | 10 702 (89.9%) | 11 898 | 1.30        | 1.18     | 1.44  |
| <b>Relationship</b>                 |                |        |             |          |       |
| Not stable                          | 10 825 (89.2%) | 12 137 |             |          |       |
| Stable                              | 13 522 (87.8%) | 15 393 | 0.88        | 0.79     | 0.97  |

3.7 I associate *stroke* with the brain.

Table 24: Q3 Stroke

| Variable/Subgroup                   | Descriptive    |        | Inferential |          |       |
|-------------------------------------|----------------|--------|-------------|----------|-------|
|                                     | Positive       | N      | OR          | CI (99%) |       |
|                                     |                |        |             | Lower    | Upper |
| <b>Age</b>                          |                |        |             |          |       |
| >= 61                               | 11 174 (87.7%) | 12 737 |             |          |       |
| <= 40                               | 3 785 (84.5%)  | 4 479  | 0.76        | 0.67     | 0.87  |
| 41-60                               | 9 206 (89.3%)  | 10 314 | 1.16        | 1.04     | 1.29  |
| <b>Education</b>                    |                |        |             |          |       |
| Higher                              | 16 671 (88.3%) | 18 889 |             |          |       |
| Lower                               | 7 494 (86.7%)  | 8 641  | 0.87        | 0.79     | 0.96  |
| <b>Gender</b>                       |                |        |             |          |       |
| Woman                               | 17 612 (89.9%) | 19 589 |             |          |       |
| Man                                 | 6 440 (82.4%)  | 7 815  | 0.53        | 0.48     | 0.58  |
| Other/Undisclosed                   | 113 (89.7%)    | 126    | 0.98        | 0.46     | 2.08  |
| <b>Healthcare Experience</b>        |                |        |             |          |       |
| No                                  | 14 292 (84.5%) | 16 914 |             |          |       |
| Yes                                 | 9 873 (93.0%)  | 10 616 | 2.44        | 2.18     | 2.73  |
| <b>Cognitive Health</b>             |                |        |             |          |       |
| Average or above                    | 22 748 (87.9%) | 25 876 |             |          |       |
| Below average                       | 1 417 (85.7%)  | 1 654  | 0.82        | 0.68     | 0.99  |
| <b>Mental Health</b>                |                |        |             |          |       |
| Average or above                    | 21 018 (87.9%) | 23 909 |             |          |       |
| Below average                       | 3 147 (86.9%)  | 3 621  | 0.91        | 0.80     | 1.05  |
| <b>Illness Experience</b>           |                |        |             |          |       |
| No                                  | 14 228 (86.7%) | 16 409 |             |          |       |
| Yes                                 | 9 937 (89.4%)  | 11 121 | 1.29        | 1.17     | 1.42  |
| <b>Brain Disease Caregiver</b>      |                |        |             |          |       |
| No                                  | 12 575 (85.4%) | 14 721 |             |          |       |
| Yes                                 | 11 590 (90.5%) | 12 809 | 1.62        | 1.47     | 1.79  |
| <b>Brain Research Participation</b> |                |        |             |          |       |
| No                                  | 13 555 (86.7%) | 15 632 |             |          |       |
| Yes                                 | 10 610 (89.2%) | 11 898 | 1.26        | 1.15     | 1.39  |
| <b>Relationship</b>                 |                |        |             |          |       |
| Not stable                          | 10 537 (86.8%) | 12 137 |             |          |       |
| Stable                              | 13 628 (88.5%) | 15 393 | 1.17        | 1.07     | 1.29  |

3.8 I associate *parkinson's* with the brain.

Table 25: Q3 Parkinson's

| Variable/Subgroup                   | Descriptive    |        | Inferential |          |       |
|-------------------------------------|----------------|--------|-------------|----------|-------|
|                                     | Positive       | N      | OR          | CI (99%) |       |
|                                     |                |        |             | Lower    | Upper |
| <b>Age</b>                          |                |        |             |          |       |
| >= 61                               | 10 961 (86.1%) | 12 737 |             |          |       |
| <= 40                               | 3 727 (83.2%)  | 4 479  | 0.80        | 0.71     | 0.91  |
| 41-60                               | 9 021 (87.5%)  | 10 314 | 1.13        | 1.02     | 1.25  |
| <b>Education</b>                    |                |        |             |          |       |
| Higher                              | 16 612 (87.9%) | 18 889 |             |          |       |
| Lower                               | 7 097 (82.1%)  | 8 641  | 0.63        | 0.57     | 0.69  |
| <b>Gender</b>                       |                |        |             |          |       |
| Woman                               | 17 017 (86.9%) | 19 589 |             |          |       |
| Man                                 | 6 585 (84.3%)  | 7 815  | 0.81        | 0.73     | 0.89  |
| Other/Undisclosed                   | 107 (84.9%)    | 126    | 0.85        | 0.45     | 1.62  |
| <b>Healthcare Experience</b>        |                |        |             |          |       |
| No                                  | 14 054 (83.1%) | 16 914 |             |          |       |
| Yes                                 | 9 655 (90.9%)  | 10 616 | 2.04        | 1.85     | 2.26  |
| <b>Cognitive Health</b>             |                |        |             |          |       |
| Average or above                    | 22 337 (86.3%) | 25 876 |             |          |       |
| Below average                       | 1 372 (83.0%)  | 1 654  | 0.77        | 0.65     | 0.92  |
| <b>Mental Health</b>                |                |        |             |          |       |
| Average or above                    | 20 658 (86.4%) | 23 909 |             |          |       |
| Below average                       | 3 051 (84.3%)  | 3 621  | 0.84        | 0.74     | 0.96  |
| <b>Illness Experience</b>           |                |        |             |          |       |
| No                                  | 14 066 (85.7%) | 16 409 |             |          |       |
| Yes                                 | 9 643 (86.7%)  | 11 121 | 1.09        | 0.99     | 1.19  |
| <b>Brain Disease Caregiver</b>      |                |        |             |          |       |
| No                                  | 12 381 (84.1%) | 14 721 |             |          |       |
| Yes                                 | 11 328 (88.4%) | 12 809 | 1.45        | 1.32     | 1.58  |
| <b>Brain Research Participation</b> |                |        |             |          |       |
| No                                  | 13 190 (84.4%) | 15 632 |             |          |       |
| Yes                                 | 10 519 (88.4%) | 11 898 | 1.41        | 1.29     | 1.55  |
| <b>Relationship</b>                 |                |        |             |          |       |
| Not stable                          | 10 314 (85.0%) | 12 137 |             |          |       |
| Stable                              | 13 395 (87.0%) | 15 393 | 1.18        | 1.08     | 1.30  |



### 3.9 I associate *migraine* with the brain.

Table 26: Q3 Migraine

| Variable/Subgroup                   | Descriptive    |        | Inferential |          |       |
|-------------------------------------|----------------|--------|-------------|----------|-------|
|                                     | Positive       | N      | OR          | CI (99%) |       |
|                                     |                |        |             | Lower    | Upper |
| <b>Age</b>                          |                |        |             |          |       |
| >= 61                               | 9 880 (77.6%)  | 12 737 |             |          |       |
| 41-60                               | 8 870 (86.0%)  | 10 314 | 1.78        | 1.62     | 1.95  |
| <= 40                               | 3 954 (88.3%)  | 4 479  | 2.18        | 1.91     | 2.48  |
| <b>Education</b>                    |                |        |             |          |       |
| Higher                              | 15 915 (84.3%) | 18 889 |             |          |       |
| Lower                               | 6 789 (78.6%)  | 8 641  | 0.69        | 0.63     | 0.75  |
| <b>Gender</b>                       |                |        |             |          |       |
| Woman                               | 16 366 (83.5%) | 19 589 |             |          |       |
| Man                                 | 6 232 (79.7%)  | 7 815  | 0.78        | 0.71     | 0.85  |
| Other/Undisclosed                   | 106 (84.1%)    | 126    | 1.04        | 0.56     | 1.96  |
| <b>Healthcare Experience</b>        |                |        |             |          |       |
| No                                  | 13 446 (79.5%) | 16 914 |             |          |       |
| Yes                                 | 9 258 (87.2%)  | 10 616 | 1.76        | 1.61     | 1.92  |
| <b>Cognitive Health</b>             |                |        |             |          |       |
| Average or above                    | 21 407 (82.7%) | 25 876 |             |          |       |
| Below average                       | 1 297 (78.4%)  | 1 654  | 0.76        | 0.65     | 0.89  |
| <b>Mental Health</b>                |                |        |             |          |       |
| Average or above                    | 19 708 (82.4%) | 23 909 |             |          |       |
| Below average                       | 2 996 (82.7%)  | 3 621  | 1.02        | 0.90     | 1.15  |
| <b>Illness Experience</b>           |                |        |             |          |       |
| No                                  | 13 431 (81.9%) | 16 409 |             |          |       |
| Yes                                 | 9 273 (83.4%)  | 11 121 | 1.11        | 1.02     | 1.21  |
| <b>Brain Disease Caregiver</b>      |                |        |             |          |       |
| No                                  | 11 912 (80.9%) | 14 721 |             |          |       |
| Yes                                 | 10 792 (84.3%) | 12 809 | 1.26        | 1.16     | 1.37  |
| <b>Brain Research Participation</b> |                |        |             |          |       |
| No                                  | 12 796 (81.9%) | 15 632 |             |          |       |
| Yes                                 | 9 908 (83.3%)  | 11 898 | 1.10        | 1.02     | 1.20  |
| <b>Relationship</b>                 |                |        |             |          |       |
| Not stable                          | 9 976 (82.2%)  | 12 137 |             |          |       |
| Stable                              | 12 728 (82.7%) | 15 393 | 1.03        | 0.95     | 1.12  |

3.10 I associate *cancer* with the brain.

Table 27: Q3 Cancer

| Variable/Subgroup                   | Descriptive   |        | Inferential |          |       |
|-------------------------------------|---------------|--------|-------------|----------|-------|
|                                     | Positive      | N      | OR          | CI (99%) |       |
|                                     |               |        |             | Lower    | Upper |
| <b>Age</b>                          |               |        |             |          |       |
| >= 61                               | 3 627 (28.5%) | 12 737 |             |          |       |
| 41-60                               | 3 513 (34.1%) | 10 314 | 1.30        | 1.21     | 1.40  |
| <= 40                               | 1 709 (38.2%) | 4 479  | 1.55        | 1.41     | 1.70  |
| <b>Education</b>                    |               |        |             |          |       |
| Higher                              | 6 457 (34.2%) | 18 889 |             |          |       |
| Lower                               | 2 392 (27.7%) | 8 641  | 0.74        | 0.68     | 0.79  |
| <b>Gender</b>                       |               |        |             |          |       |
| Woman                               | 6 623 (33.8%) | 19 589 |             |          |       |
| Man                                 | 2 179 (27.9%) | 7 815  | 0.76        | 0.70     | 0.82  |
| Other/Undisclosed                   | 47 (37.3%)    | 126    | 1.16        | 0.72     | 1.88  |
| <b>Healthcare Experience</b>        |               |        |             |          |       |
| No                                  | 4 634 (27.4%) | 16 914 |             |          |       |
| Yes                                 | 4 215 (39.7%) | 10 616 | 1.74        | 1.63     | 1.87  |
| <b>Cognitive Health</b>             |               |        |             |          |       |
| Average or above                    | 8 381 (32.4%) | 25 876 |             |          |       |
| Below average                       | 468 (28.3%)   | 1 654  | 0.82        | 0.71     | 0.95  |
| <b>Mental Health</b>                |               |        |             |          |       |
| Average or above                    | 7 625 (31.9%) | 23 909 |             |          |       |
| Below average                       | 1 224 (33.8%) | 3 621  | 1.09        | 0.99     | 1.20  |
| <b>Illness Experience</b>           |               |        |             |          |       |
| No                                  | 5 099 (31.1%) | 16 409 |             |          |       |
| Yes                                 | 3 750 (33.7%) | 11 121 | 1.13        | 1.05     | 1.21  |
| <b>Brain Disease Caregiver</b>      |               |        |             |          |       |
| No                                  | 4 390 (29.8%) | 14 721 |             |          |       |
| Yes                                 | 4 459 (34.8%) | 12 809 | 1.26        | 1.18     | 1.34  |
| <b>Brain Research Participation</b> |               |        |             |          |       |
| No                                  | 4 801 (30.7%) | 15 632 |             |          |       |
| Yes                                 | 4 048 (34.0%) | 11 898 | 1.16        | 1.09     | 1.24  |
| <b>Relationship</b>                 |               |        |             |          |       |
| Not stable                          | 3 892 (32.1%) | 12 137 |             |          |       |
| Stable                              | 4 957 (32.2%) | 15 393 | 1.01        | 0.94     | 1.08  |

### 3.11 I associate *hypertension* with the brain.

Table 28: Q3 Hypertension

| Variable/Subgroup                   | Descriptive   |        | Inferential |          |       |
|-------------------------------------|---------------|--------|-------------|----------|-------|
|                                     | Positive      | N      | OR          | CI (99%) |       |
|                                     |               |        |             | Lower    | Upper |
| <b>Age</b>                          |               |        |             |          |       |
| >= 61                               | 4 353 (34.2%) | 12 737 |             |          |       |
| <= 40                               | 1 136 (25.4%) | 4 479  | 0.65        | 0.59     | 0.72  |
| 41-60                               | 3 247 (31.5%) | 10 314 | 0.88        | 0.82     | 0.95  |
| <b>Education</b>                    |               |        |             |          |       |
| Higher                              | 6 326 (33.5%) | 18 889 |             |          |       |
| Lower                               | 2 410 (27.9%) | 8 641  | 0.77        | 0.71     | 0.83  |
| <b>Gender</b>                       |               |        |             |          |       |
| Woman                               | 6 610 (33.7%) | 19 589 |             |          |       |
| Man                                 | 2 074 (26.5%) | 7 815  | 0.71        | 0.66     | 0.77  |
| Other/Undisclosed                   | 52 (41.3%)    | 126    | 1.38        | 0.86     | 2.20  |
| <b>Healthcare Experience</b>        |               |        |             |          |       |
| No                                  | 4 214 (24.9%) | 16 914 |             |          |       |
| Yes                                 | 4 522 (42.6%) | 10 616 | 2.24        | 2.09     | 2.39  |
| <b>Cognitive Health</b>             |               |        |             |          |       |
| Average or above                    | 8 247 (31.9%) | 25 876 |             |          |       |
| Below average                       | 489 (29.6%)   | 1 654  | 0.90        | 0.78     | 1.04  |
| <b>Mental Health</b>                |               |        |             |          |       |
| Average or above                    | 7 713 (32.3%) | 23 909 |             |          |       |
| Below average                       | 1 023 (28.3%) | 3 621  | 0.83        | 0.75     | 0.92  |
| <b>Illness Experience</b>           |               |        |             |          |       |
| No                                  | 4 940 (30.1%) | 16 409 |             |          |       |
| Yes                                 | 3 796 (34.1%) | 11 121 | 1.20        | 1.12     | 1.29  |
| <b>Brain Disease Caregiver</b>      |               |        |             |          |       |
| No                                  | 4 044 (27.5%) | 14 721 |             |          |       |
| Yes                                 | 4 692 (36.6%) | 12 809 | 1.53        | 1.43     | 1.63  |
| <b>Brain Research Participation</b> |               |        |             |          |       |
| No                                  | 4 662 (29.8%) | 15 632 |             |          |       |
| Yes                                 | 4 074 (34.2%) | 11 898 | 1.23        | 1.15     | 1.31  |
| <b>Relationship</b>                 |               |        |             |          |       |
| Not stable                          | 3 738 (30.8%) | 12 137 |             |          |       |
| Stable                              | 4 998 (32.5%) | 15 393 | 1.08        | 1.01     | 1.16  |

### 3.12 I associate *diabetes* with the brain.

Table 29: Q3 Diabetes

| Variable/Subgroup                   | Descriptive   |        | Inferential |          |       |
|-------------------------------------|---------------|--------|-------------|----------|-------|
|                                     | Positive      | N      | OR          | CI (99%) |       |
|                                     |               |        |             | Lower    | Upper |
| <b>Age</b>                          |               |        |             |          |       |
| >= 61                               | 1 943 (15.3%) | 12 737 |             |          |       |
| <= 40                               | 658 (14.7%)   | 4 479  | 0.96        | 0.84     | 1.09  |
| 41-60                               | 1 775 (17.2%) | 10 314 | 1.15        | 1.05     | 1.27  |
| <b>Education</b>                    |               |        |             |          |       |
| Higher                              | 3 271 (17.3%) | 18 889 |             |          |       |
| Lower                               | 1 105 (12.8%) | 8 641  | 0.70        | 0.64     | 0.77  |
| <b>Gender</b>                       |               |        |             |          |       |
| Woman                               | 3 265 (16.7%) | 19 589 |             |          |       |
| Man                                 | 1 079 (13.8%) | 7 815  | 0.80        | 0.73     | 0.88  |
| Other/Undisclosed                   | 32 (25.4%)    | 126    | 1.70        | 1.00     | 2.89  |
| <b>Healthcare Experience</b>        |               |        |             |          |       |
| No                                  | 1 793 (10.6%) | 16 914 |             |          |       |
| Yes                                 | 2 583 (24.3%) | 10 616 | 2.71        | 2.49     | 2.96  |
| <b>Cognitive Health</b>             |               |        |             |          |       |
| Average or above                    | 4 117 (15.9%) | 25 876 |             |          |       |
| Below average                       | 259 (15.7%)   | 1 654  | 0.98        | 0.82     | 1.17  |
| <b>Mental Health</b>                |               |        |             |          |       |
| Average or above                    | 3 875 (16.2%) | 23 909 |             |          |       |
| Below average                       | 501 (13.8%)   | 3 621  | 0.83        | 0.73     | 0.95  |
| <b>Illness Experience</b>           |               |        |             |          |       |
| No                                  | 2 405 (14.7%) | 16 409 |             |          |       |
| Yes                                 | 1 971 (17.7%) | 11 121 | 1.25        | 1.15     | 1.37  |
| <b>Brain Disease Caregiver</b>      |               |        |             |          |       |
| No                                  | 1 995 (13.6%) | 14 721 |             |          |       |
| Yes                                 | 2 381 (18.6%) | 12 809 | 1.46        | 1.34     | 1.59  |
| <b>Brain Research Participation</b> |               |        |             |          |       |
| No                                  | 2 320 (14.8%) | 15 632 |             |          |       |
| Yes                                 | 2 056 (17.3%) | 11 898 | 1.20        | 1.10     | 1.31  |
| <b>Relationship</b>                 |               |        |             |          |       |
| Not stable                          | 1 934 (15.9%) | 12 137 |             |          |       |
| Stable                              | 2 442 (15.9%) | 15 393 | 0.99        | 0.91     | 1.08  |

### 3.13 I associate *arthritis* with the brain.

Table 30: Q3 Arthritis

| Variable/Subgroup                   | Descriptive  |        | Inferential |          |       |
|-------------------------------------|--------------|--------|-------------|----------|-------|
|                                     | Positive     | N      | OR          | CI (99%) |       |
|                                     |              |        |             | Lower    | Upper |
| <b>Age</b>                          |              |        |             |          |       |
| >= 61                               | 578 (4.5%)   | 12 737 |             |          |       |
| <= 40                               | 205 (4.6%)   | 4 479  | 1.01        | 0.81     | 1.25  |
| 41-60                               | 535 (5.2%)   | 10 314 | 1.15        | 0.98     | 1.35  |
| <b>Education</b>                    |              |        |             |          |       |
| Higher                              | 920 (4.9%)   | 18 889 |             |          |       |
| Lower                               | 398 (4.6%)   | 8 641  | 0.94        | 0.80     | 1.11  |
| <b>Gender</b>                       |              |        |             |          |       |
| Woman                               | 1 005 (5.1%) | 19 589 |             |          |       |
| Man                                 | 305 (3.9%)   | 7 815  | 0.75        | 0.63     | 0.89  |
| Other/Undisclosed                   | 8 (6.3%)     | 126    | 1.25        | 0.49     | 3.23  |
| <b>Healthcare Experience</b>        |              |        |             |          |       |
| No                                  | 577 (3.4%)   | 16 914 |             |          |       |
| Yes                                 | 741 (7.0%)   | 10 616 | 2.12        | 1.83     | 2.46  |
| <b>Cognitive Health</b>             |              |        |             |          |       |
| Average or above                    | 1 216 (4.7%) | 25 876 |             |          |       |
| Below average                       | 102 (6.2%)   | 1 654  | 1.33        | 1.01     | 1.75  |
| <b>Mental Health</b>                |              |        |             |          |       |
| Average or above                    | 1 151 (4.8%) | 23 909 |             |          |       |
| Below average                       | 167 (4.6%)   | 3 621  | 0.96        | 0.77     | 1.19  |
| <b>Illness Experience</b>           |              |        |             |          |       |
| No                                  | 641 (3.9%)   | 16 409 |             |          |       |
| Yes                                 | 677 (6.1%)   | 11 121 | 1.59        | 1.38     | 1.84  |
| <b>Brain Disease Caregiver</b>      |              |        |             |          |       |
| No                                  | 622 (4.2%)   | 14 721 |             |          |       |
| Yes                                 | 696 (5.4%)   | 12 809 | 1.30        | 1.13     | 1.51  |
| <b>Brain Research Participation</b> |              |        |             |          |       |
| No                                  | 737 (4.7%)   | 15 632 |             |          |       |
| Yes                                 | 581 (4.9%)   | 11 898 | 1.04        | 0.90     | 1.20  |
| <b>Relationship</b>                 |              |        |             |          |       |
| Not stable                          | 631 (5.2%)   | 12 137 |             |          |       |
| Stable                              | 687 (4.5%)   | 15 393 | 0.85        | 0.74     | 0.99  |

1  
2  
3  
4  
5  
6  
7  
8  
9  
10  
11  
12  
13  
14  
15  
16  
17  
18  
19  
20  
21  
22  
23  
24  
25  
26  
27  
28  
29  
30  
31  
32  
33  
34  
35  
36  
37  
38  
39  
40  
41  
42  
43  
44  
45  
46  
47  
48  
49  
50  
51  
52  
53  
54  
55  
56  
57  
58  
59  
60

->

For peer review only

# Reporting checklist for cross sectional study.

Based on the STROBE cross sectional guidelines.

## Instructions to authors

Complete this checklist by entering the page numbers from your manuscript where readers will find each of the items listed below.

Your article may not currently address all the items on the checklist. Please modify your text to include the missing information. If you are certain that an item does not apply, please write "n/a" and provide a short explanation.

Upload your completed checklist as an extra file when you submit to a journal.

In your methods section, say that you used the STROBE cross sectional reporting guidelines, and cite them as:

von Elm E, Altman DG, Egger M, Pocock SJ, Gotsche PC, Vandenbroucke JP. The Strengthening the Reporting of Observational Studies in Epidemiology (STROBE) Statement: guidelines for reporting observational studies.

|                           |                                                                                                        | Page   |
|---------------------------|--------------------------------------------------------------------------------------------------------|--------|
|                           | Reporting Item                                                                                         | Number |
| <b>Title and abstract</b> |                                                                                                        |        |
| Title                     | <a href="#">#1a</a> Indicate the study's design with a commonly used term in the title or the abstract | 1      |

|    |                      |                     |                                                                 |     |
|----|----------------------|---------------------|-----------------------------------------------------------------|-----|
| 1  | Abstract             | <a href="#">#1b</a> | Provide in the abstract an informative and balanced summary     | 4   |
| 2  |                      |                     | of what was done and what was found                             |     |
| 3  |                      |                     |                                                                 |     |
| 4  |                      |                     |                                                                 |     |
| 5  |                      |                     |                                                                 |     |
| 6  | <b>Introduction</b>  |                     |                                                                 |     |
| 7  |                      |                     |                                                                 |     |
| 8  |                      |                     |                                                                 |     |
| 9  | Background /         | <a href="#">#2</a>  | Explain the scientific background and rationale for the         | 5-6 |
| 10 | rationale            |                     | investigation being reported                                    |     |
| 11 |                      |                     |                                                                 |     |
| 12 |                      |                     |                                                                 |     |
| 13 |                      |                     |                                                                 |     |
| 14 |                      |                     |                                                                 |     |
| 15 | Objectives           | <a href="#">#3</a>  | State specific objectives, including any prespecified           | 5-6 |
| 16 |                      |                     | hypotheses                                                      |     |
| 17 |                      |                     |                                                                 |     |
| 18 |                      |                     |                                                                 |     |
| 19 |                      |                     |                                                                 |     |
| 20 | <b>Methods</b>       |                     |                                                                 |     |
| 21 |                      |                     |                                                                 |     |
| 22 |                      |                     |                                                                 |     |
| 23 | Study design         | <a href="#">#4</a>  | Present key elements of study design early in the paper         | 6   |
| 24 |                      |                     |                                                                 |     |
| 25 |                      |                     |                                                                 |     |
| 26 | Setting              | <a href="#">#5</a>  | Describe the setting, locations, and relevant dates, including  | 6   |
| 27 |                      |                     | periods of recruitment, exposure, follow-up, and data           |     |
| 28 |                      |                     | collection                                                      |     |
| 29 |                      |                     |                                                                 |     |
| 30 |                      |                     |                                                                 |     |
| 31 |                      |                     |                                                                 |     |
| 32 |                      |                     |                                                                 |     |
| 33 |                      |                     |                                                                 |     |
| 34 | Eligibility criteria | <a href="#">#6a</a> | Give the eligibility criteria, and the sources and methods of   | 6   |
| 35 |                      |                     | selection of participants.                                      |     |
| 36 |                      |                     |                                                                 |     |
| 37 |                      |                     |                                                                 |     |
| 38 |                      |                     |                                                                 |     |
| 39 |                      | <a href="#">#7</a>  | Clearly define all outcomes, exposures, predictors, potential   | N/A |
| 40 |                      |                     | confounders, and effect modifiers. Give diagnostic criteria, if |     |
| 41 |                      |                     | applicable                                                      |     |
| 42 |                      |                     |                                                                 |     |
| 43 |                      |                     |                                                                 |     |
| 44 |                      |                     |                                                                 |     |
| 45 |                      |                     |                                                                 |     |
| 46 |                      |                     |                                                                 |     |
| 47 | Data sources /       | <a href="#">#8</a>  | For each variable of interest give sources of data and details  | 7-8 |
| 48 | measurement          |                     | of methods of assessment (measurement). Describe                |     |
| 49 |                      |                     | comparability of assessment methods if there is more than       |     |
| 50 |                      |                     | one group. Give information separately for for exposed and      |     |
| 51 |                      |                     | unexposed groups if applicable.                                 |     |
| 52 |                      |                     |                                                                 |     |
| 53 |                      |                     |                                                                 |     |
| 54 |                      |                     |                                                                 |     |
| 55 |                      |                     |                                                                 |     |
| 56 |                      |                     |                                                                 |     |
| 57 |                      |                     |                                                                 |     |
| 58 |                      |                     |                                                                 |     |
| 59 |                      |                     |                                                                 |     |
| 60 |                      |                     |                                                                 |     |



|    |                |                      |                                                               |      |
|----|----------------|----------------------|---------------------------------------------------------------|------|
| 1  | Bias           | <a href="#">#9</a>   | Describe any efforts to address potential sources of bias     | N/A  |
| 2  |                |                      |                                                               |      |
| 3  |                |                      |                                                               |      |
| 4  | Study size     | <a href="#">#10</a>  | Explain how the study size was arrived at                     | 7    |
| 5  |                |                      |                                                               |      |
| 6  |                |                      |                                                               |      |
| 7  | Quantitative   | <a href="#">#11</a>  | Explain how quantitative variables were handled in the        | 9-10 |
| 8  | variables      |                      | analyses. If applicable, describe which groupings were        |      |
| 9  |                |                      | chosen, and why                                               |      |
| 10 |                |                      |                                                               |      |
| 11 |                |                      |                                                               |      |
| 12 |                |                      |                                                               |      |
| 13 |                |                      |                                                               |      |
| 14 |                |                      |                                                               |      |
| 15 | Statistical    | <a href="#">#12a</a> | Describe all statistical methods, including those used to     | 9-10 |
| 16 | methods        |                      | control for confounding                                       |      |
| 17 |                |                      |                                                               |      |
| 18 |                |                      |                                                               |      |
| 19 |                |                      |                                                               |      |
| 20 | Statistical    | <a href="#">#12b</a> | Describe any methods used to examine subgroups and            | 9-10 |
| 21 | methods        |                      | interactions                                                  |      |
| 22 |                |                      |                                                               |      |
| 23 |                |                      |                                                               |      |
| 24 |                |                      |                                                               |      |
| 25 |                |                      |                                                               |      |
| 26 | Statistical    | <a href="#">#12c</a> | Explain how missing data were addressed                       | N/A  |
| 27 | methods        |                      |                                                               |      |
| 28 |                |                      |                                                               |      |
| 29 |                |                      |                                                               |      |
| 30 |                |                      |                                                               |      |
| 31 | Statistical    | <a href="#">#12d</a> | If applicable, describe analytical methods taking account of  | N/A  |
| 32 | methods        |                      | sampling strategy                                             |      |
| 33 |                |                      |                                                               |      |
| 34 |                |                      |                                                               |      |
| 35 |                |                      |                                                               |      |
| 36 | Statistical    | <a href="#">#12e</a> | Describe any sensitivity analyses                             | N/A  |
| 37 | methods        |                      |                                                               |      |
| 38 |                |                      |                                                               |      |
| 39 |                |                      |                                                               |      |
| 40 |                |                      |                                                               |      |
| 41 |                |                      |                                                               |      |
| 42 | <b>Results</b> |                      |                                                               |      |
| 43 |                |                      |                                                               |      |
| 44 |                |                      |                                                               |      |
| 45 | Participants   | <a href="#">#13a</a> | Report numbers of individuals at each stage of study—eg       | 10   |
| 46 |                |                      | numbers potentially eligible, examined for eligibility,       |      |
| 47 |                |                      | confirmed eligible, included in the study, completing follow- |      |
| 48 |                |                      | up, and analysed. Give information separately for for         |      |
| 49 |                |                      | exposed and unexposed groups if applicable.                   |      |
| 50 |                |                      |                                                               |      |
| 51 |                |                      |                                                               |      |
| 52 |                |                      |                                                               |      |
| 53 |                |                      |                                                               |      |
| 54 |                |                      |                                                               |      |
| 55 |                |                      |                                                               |      |
| 56 |                |                      |                                                               |      |
| 57 | Participants   | <a href="#">#13b</a> | Give reasons for non-participation at each stage              | N/A  |
| 58 |                |                      |                                                               |      |
| 59 |                |                      |                                                               |      |
| 60 |                |                      |                                                               |      |

|    |                   |                      |                                                                   |       |
|----|-------------------|----------------------|-------------------------------------------------------------------|-------|
| 1  | Participants      | <a href="#">#13c</a> | Consider use of a flow diagram                                    | N/A   |
| 2  |                   |                      |                                                                   |       |
| 3  |                   |                      |                                                                   |       |
| 4  | Descriptive data  | <a href="#">#14a</a> | Give characteristics of study participants (eg demographic,       | 12    |
| 5  |                   |                      | clinical, social) and information on exposures and potential      |       |
| 6  |                   |                      | confounders. Give information separately for exposed and          |       |
| 7  |                   |                      | unexposed groups if applicable.                                   |       |
| 8  |                   |                      |                                                                   |       |
| 9  |                   |                      |                                                                   |       |
| 10 |                   |                      |                                                                   |       |
| 11 |                   |                      |                                                                   |       |
| 12 |                   |                      |                                                                   |       |
| 13 |                   |                      |                                                                   |       |
| 14 | Descriptive data  | <a href="#">#14b</a> | Indicate number of participants with missing data for each        | N/A   |
| 15 |                   |                      | variable of interest                                              |       |
| 16 |                   |                      |                                                                   |       |
| 17 |                   |                      |                                                                   |       |
| 18 |                   |                      |                                                                   |       |
| 19 | Outcome data      | <a href="#">#15</a>  | Report numbers of outcome events or summary measures.             | 13-21 |
| 20 |                   |                      | Give information separately for exposed and unexposed             |       |
| 21 |                   |                      | groups if applicable.                                             |       |
| 22 |                   |                      |                                                                   |       |
| 23 |                   |                      |                                                                   |       |
| 24 |                   |                      |                                                                   |       |
| 25 |                   |                      |                                                                   |       |
| 26 |                   |                      |                                                                   |       |
| 27 | Main results      | <a href="#">#16a</a> | Give unadjusted estimates and, if applicable, confounder-         | 13-21 |
| 28 |                   |                      | adjusted estimates and their precision (eg, 95% confidence        |       |
| 29 |                   |                      | interval). Make clear which confounders were adjusted for         |       |
| 30 |                   |                      | and why they were included                                        |       |
| 31 |                   |                      |                                                                   |       |
| 32 |                   |                      |                                                                   |       |
| 33 |                   |                      |                                                                   |       |
| 34 |                   |                      |                                                                   |       |
| 35 |                   |                      |                                                                   |       |
| 36 |                   |                      |                                                                   |       |
| 37 | Main results      | <a href="#">#16b</a> | Report category boundaries when continuous variables were         | 9-10  |
| 38 |                   |                      | categorized                                                       |       |
| 39 |                   |                      |                                                                   |       |
| 40 |                   |                      |                                                                   |       |
| 41 |                   |                      |                                                                   |       |
| 42 | Main results      | <a href="#">#16c</a> | If relevant, consider translating estimates of relative risk into | N/A   |
| 43 |                   |                      | absolute risk for a meaningful time period                        |       |
| 44 |                   |                      |                                                                   |       |
| 45 |                   |                      |                                                                   |       |
| 46 |                   |                      |                                                                   |       |
| 47 |                   |                      |                                                                   |       |
| 48 | Other analyses    | <a href="#">#17</a>  | Report other analyses done—e.g., analyses of subgroups            | N/A   |
| 49 |                   |                      | and interactions, and sensitivity analyses                        |       |
| 50 |                   |                      |                                                                   |       |
| 51 |                   |                      |                                                                   |       |
| 52 |                   |                      |                                                                   |       |
| 53 | <b>Discussion</b> |                      |                                                                   |       |
| 54 |                   |                      |                                                                   |       |
| 55 |                   |                      |                                                                   |       |
| 56 | Key results       | <a href="#">#18</a>  | Summarise key results with reference to study objectives          | 22-24 |
| 57 |                   |                      |                                                                   |       |
| 58 |                   |                      |                                                                   |       |
| 59 |                   |                      |                                                                   |       |
| 60 |                   |                      |                                                                   |       |

|    |                          |                     |                                                                |       |
|----|--------------------------|---------------------|----------------------------------------------------------------|-------|
| 1  | Limitations              | <a href="#">#19</a> | Discuss limitations of the study, taking into account sources  | 24-25 |
| 2  |                          |                     | of potential bias or imprecision. Discuss both direction and   |       |
| 3  |                          |                     | magnitude of any potential bias.                               |       |
| 4  |                          |                     |                                                                |       |
| 5  |                          |                     |                                                                |       |
| 6  |                          |                     |                                                                |       |
| 7  |                          |                     |                                                                |       |
| 8  |                          |                     |                                                                |       |
| 9  | Interpretation           | <a href="#">#20</a> | Give a cautious overall interpretation considering objectives, | 22-24 |
| 10 |                          |                     | limitations, multiplicity of analyses, results from similar    |       |
| 11 |                          |                     | studies, and other relevant evidence.                          |       |
| 12 |                          |                     |                                                                |       |
| 13 |                          |                     |                                                                |       |
| 14 |                          |                     |                                                                |       |
| 15 |                          |                     |                                                                |       |
| 16 | Generalisability         | <a href="#">#21</a> | Discuss the generalisability (external validity) of the study  | 25-26 |
| 17 |                          |                     | results.                                                       |       |
| 18 |                          |                     |                                                                |       |
| 19 |                          |                     |                                                                |       |
| 20 |                          |                     |                                                                |       |
| 21 |                          |                     |                                                                |       |
| 22 | <b>Other Information</b> |                     |                                                                |       |
| 23 |                          |                     |                                                                |       |
| 24 |                          |                     |                                                                |       |
| 25 | Funding                  | <a href="#">#22</a> | Give the source of funding and the role of the funders for the | 27    |
| 26 |                          |                     | present study and, if applicable, for the original study on    |       |
| 27 |                          |                     | which the present article is based                             |       |
| 28 |                          |                     |                                                                |       |
| 29 |                          |                     |                                                                |       |
| 30 |                          |                     |                                                                |       |
| 31 |                          |                     |                                                                |       |
| 32 |                          |                     |                                                                |       |

33 None The STROBE checklist is distributed under the terms of the Creative Commons Attribution  
34 License CC-BY. This checklist can be completed online using <https://www.goodreports.org/>, a tool  
35 made by the [EQUATOR Network](#) in collaboration with [Penelope.ai](#)  
36  
37  
38  
39  
40  
41  
42  
43  
44  
45  
46  
47  
48  
49  
50  
51  
52  
53  
54  
55  
56  
57  
58  
59  
60

# BMJ Open

## Public perceptions of brain health: an international, online cross-sectional survey

|                                 |                                                                                                                                                                                                                                                                                                                                                                                                                                                                                                                                                                                                                                                                                                                                                                                                                                                                                                                                                                                                                                                                                                                                                                                                                                                                                                                                                                                                                                            |
|---------------------------------|--------------------------------------------------------------------------------------------------------------------------------------------------------------------------------------------------------------------------------------------------------------------------------------------------------------------------------------------------------------------------------------------------------------------------------------------------------------------------------------------------------------------------------------------------------------------------------------------------------------------------------------------------------------------------------------------------------------------------------------------------------------------------------------------------------------------------------------------------------------------------------------------------------------------------------------------------------------------------------------------------------------------------------------------------------------------------------------------------------------------------------------------------------------------------------------------------------------------------------------------------------------------------------------------------------------------------------------------------------------------------------------------------------------------------------------------|
| Journal:                        | <i>BMJ Open</i>                                                                                                                                                                                                                                                                                                                                                                                                                                                                                                                                                                                                                                                                                                                                                                                                                                                                                                                                                                                                                                                                                                                                                                                                                                                                                                                                                                                                                            |
| Manuscript ID                   | bmjopen-2021-057999.R2                                                                                                                                                                                                                                                                                                                                                                                                                                                                                                                                                                                                                                                                                                                                                                                                                                                                                                                                                                                                                                                                                                                                                                                                                                                                                                                                                                                                                     |
| Article Type:                   | Original research                                                                                                                                                                                                                                                                                                                                                                                                                                                                                                                                                                                                                                                                                                                                                                                                                                                                                                                                                                                                                                                                                                                                                                                                                                                                                                                                                                                                                          |
| Date Submitted by the Author:   | 23-Mar-2022                                                                                                                                                                                                                                                                                                                                                                                                                                                                                                                                                                                                                                                                                                                                                                                                                                                                                                                                                                                                                                                                                                                                                                                                                                                                                                                                                                                                                                |
| Complete List of Authors:       | Budin Ljøsne , Isabelle; Norwegian Institute of Public Health, Mowinckel , Athanasia Monika ; University of Oslo<br>Friedman, Barbara ; University of Oslo<br>Ebmeier , Klaus; University of Oxford<br>Drevon, Christian; University of Oslo, Department of Nutrition, Institute of Basic Medical Sciences, Faculty of Medicine<br>Carver, Rebecca; Norwegian Institute of Public Health<br>Zsoldos, Enikő; University of Oxford<br>Fredheim, Nanna; Norwegian Institute of Public Health<br>Sørensen, Øystein; University of Oslo<br>Baaré , William Frans Christiaan ; Copenhagen University Hospital<br>Madsen , Kathrine ; Copenhagen University Hospital<br>Fjell, Anders; University of Oslo, Department of Psychology, , Center for Lifespan Changes in Brain and Cognition<br>Kievit, Rogier ; Radboud University Medical Center for Infectious Diseases<br>Ghisletta, Paolo; University of Geneva<br>Bartrés-Faz, David ; University of Barcelona<br>Nawijn, Laura ; Vrije Universiteit Amsterdam<br>Solé-Padullés , Cristina ; University of Barcelona<br>Walhovd, Kristine; University of Oslo, Department of Psychology, , Center for Lifespan Changes in Brain and Cognition<br>Düzel, Sandra; Max-Planck-Institute for Human Development<br>Zasyekina, Larisa; Volyn National University of Lesya Ukrainka<br>Iulita , Maria Florencia ; Universitat Autònoma de Barcelona<br>Ferretti, Maria Teresa ; Women's Brain Project |
| <b>Primary Subject Heading</b>: | Public health                                                                                                                                                                                                                                                                                                                                                                                                                                                                                                                                                                                                                                                                                                                                                                                                                                                                                                                                                                                                                                                                                                                                                                                                                                                                                                                                                                                                                              |
| Secondary Subject Heading:      | Mental health, Neurology, Public health                                                                                                                                                                                                                                                                                                                                                                                                                                                                                                                                                                                                                                                                                                                                                                                                                                                                                                                                                                                                                                                                                                                                                                                                                                                                                                                                                                                                    |
| Keywords:                       | Health policy < HEALTH SERVICES ADMINISTRATION & MANAGEMENT, MENTAL HEALTH, Dementia < NEUROLOGY, PREVENTIVE MEDICINE, PUBLIC HEALTH                                                                                                                                                                                                                                                                                                                                                                                                                                                                                                                                                                                                                                                                                                                                                                                                                                                                                                                                                                                                                                                                                                                                                                                                                                                                                                       |
|                                 |                                                                                                                                                                                                                                                                                                                                                                                                                                                                                                                                                                                                                                                                                                                                                                                                                                                                                                                                                                                                                                                                                                                                                                                                                                                                                                                                                                                                                                            |

1  
2  
3  
4  
5  
6  
7  
8  
9  
10  
11  
12  
13  
14  
15  
16  
17  
18  
19  
20  
21  
22  
23  
24  
25  
26  
27  
28  
29  
30  
31  
32  
33  
34  
35  
36  
37  
38  
39  
40  
41  
42  
43  
44  
45  
46  
47  
48  
49  
50  
51  
52  
53  
54  
55  
56  
57  
58  
59  
60



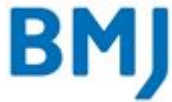

I, the Submitting Author has the right to grant and does grant on behalf of all authors of the Work (as defined in the below author licence), an exclusive licence and/or a non-exclusive licence for contributions from authors who are: i) UK Crown employees; ii) where BMJ has agreed a CC-BY licence shall apply, and/or iii) in accordance with the terms applicable for US Federal Government officers or employees acting as part of their official duties; on a worldwide, perpetual, irrevocable, royalty-free basis to BMJ Publishing Group Ltd ("BMJ") its licensees and where the relevant Journal is co-owned by BMJ to the co-owners of the Journal, to publish the Work in this journal and any other BMJ products and to exploit all rights, as set out in our [licence](#).

The Submitting Author accepts and understands that any supply made under these terms is made by BMJ to the Submitting Author unless you are acting as an employee on behalf of your employer or a postgraduate student of an affiliated institution which is paying any applicable article publishing charge ("APC") for Open Access articles. Where the Submitting Author wishes to make the Work available on an Open Access basis (and intends to pay the relevant APC), the terms of reuse of such Open Access shall be governed by a Creative Commons licence – details of these licences and which [Creative Commons](#) licence will apply to this Work are set out in our licence referred to above.

Other than as permitted in any relevant BMJ Author's Self Archiving Policies, I confirm this Work has not been accepted for publication elsewhere, is not being considered for publication elsewhere and does not duplicate material already published. I confirm all authors consent to publication of this Work and authorise the granting of this licence.

## Public perceptions of brain health: an international, online cross-sectional survey

Isabelle Budin-Ljøsne (0000-0002-4610-1662)<sup>1\*</sup>, Athanasia Monika Mowinckel (0000-0002-5756-0223)<sup>2</sup>, Barbara Bodorkos Friedman<sup>3</sup>, Klaus P Ebmeier (0000-0002-5190-7038)<sup>4</sup>, Christian A Drevon (0000-0002-7216-2784)<sup>5</sup>, Rebecca Bruu Carver (0000-0003-4490-0441)<sup>6</sup>, Enikő Zsoldos (0000-0002-0478-6165)<sup>7</sup>, Nanna Alida Grit Fredheim (0000-0001-6110-125X)<sup>8</sup>, Øystein Sørensen (0000-0003-0724-3542)<sup>9</sup>, William Frans Christiaan Baaré (0000-0002-1810-7266)<sup>10</sup>, Kathrine Skak Madsen (0000-0001-8884-5902)<sup>11</sup>, Anders M Fjell (0000-0003-2502-8774)<sup>12</sup>, Rogier A Kievit<sup>13</sup> (0000-0003-0700-4568), Paolo Ghisletta<sup>14</sup> (0000-0001-7731-2406), David Bartrés-Faz<sup>15</sup> (0000-0001-6020-4118), Laura Nawijn<sup>16</sup> (0000-0001-7183-8933), Cristina Solé-Padullés (0000-0002-6653-1053)<sup>17</sup>, Kristine B Walhovd (0000-0003-1918-1123)<sup>18</sup>, Sandra Düzel<sup>19</sup>, Larisa Zasyekina (0000-0001-8456-077)<sup>20</sup>, Maria Florencia Iulita (0000-0002-3360-4498)<sup>21</sup> and Maria Teresa Ferretti<sup>22</sup>

<sup>1</sup> Department of Genetics and Bioinformatics, Norwegian Institute of Public Health, Norway, Senior Adviser, Isabelle.budin.ljosne@fhi.no

<sup>2</sup> Center for Lifespan Changes in Brain and Cognition, Department of Psychology, University of Oslo, Norway, Researcher, a.m.mowinckel@psykologi.uio.no

<sup>3</sup> Center for Lifespan Changes in Brain and Cognition, Department of Psychology, University of Oslo, Norway, Research coordinator, b.b.friedman@psykologi.uio.no

<sup>4</sup> Department of Psychiatry (UOXF), Warneford Hospital, University of Oxford, OX37JX Oxford, UK. Chair of Old Age Psychiatry, klaus.ebmeier@psych.ox.ac.uk

<sup>5</sup> Vitas AS, Research Park, Gaustadalleen 21, 0349, Oslo, consultant; Department of Nutrition, Institute of Basic Medical Sciences, Faculty of Medicine, University of Oslo, Norway, Professor Emeritus, c.a.drevon@medisin.uio.no

<sup>6</sup> Department of Communication, Norwegian Institute of Public Health, Norway, senior Communication Officer, Rebecca.Bruu.Carver@fhi.no

1  
2 <sup>7</sup> Department of Psychiatry and Wellcome Centre for Integrative Neuroimaging (WIN), University of  
3  
4 Oxford, Oxford, OX3 7JX, United Kingdom, Postdoctoral Researcher, eniko.zsoldos@psych.ox.ac.uk  
5

6  
7 <sup>8</sup> Department of Genetics and Bioinformatics, Norwegian Institute of Public Health, Norway,  
8  
9 Researcher, NannaAlidaGrit.Fredheim@fhi.no  
10

11  
12 <sup>9</sup> Center for Lifespan Changes in Brain and Cognition, Department of Psychology, University of Oslo,  
13  
14 Norway, Associate Professor, oystein.sorensen@psykologi.uio.no  
15

16  
17 <sup>10</sup> Danish Research Centre for Magnetic Resonance, Centre for Functional and Diagnostic Imaging and  
18  
19 Research, Copenhagen University Hospital - Amager and Hvidovre, Copenhagen, Denmark, Senior  
20  
21 Researcher, wimb@drcmr.dk  
22

23  
24 <sup>11</sup> Danish Research Centre for Magnetic Resonance, Centre for Functional and Diagnostic Imaging and  
25  
26 Research, Copenhagen University Hospital - Amager and Hvidovre, Copenhagen, Denmark, Senior  
27  
28 Researcher, kathrine@drcmr.dk  
29

30  
31 <sup>12</sup> Center for Lifespan Changes in Brain and Cognition, Department of Psychology, University of Oslo,  
32  
33 Norway, Professor, a.m.fjell@psykologi.uio.no  
34

35  
36 <sup>13</sup> Cognitive Neuroscience Department, Donders Institute for Brain, Cognition and Behavior, Radboud  
37  
38 University Medical Center, Nijmegen, The Netherlands, Professor, roger.kievit@donders.ru.nl  
39

40  
41 <sup>14</sup> Faculty of Psychology and Educational Sciences, University of Geneva, Switzerland (full professor);  
42  
43 UniDistance Suisse, Brig, Switzerland (dean); Swiss National Centre of Competence in Research LIVES,  
44  
45 University of Geneva, Switzerland, Full professor, paolo.ghisletta@unige.ch  
46  
47

48  
49 <sup>15</sup> Department of Medicine, Faculty of Medicine and Health Sciences and Institute of Neuroscience,  
50  
51 University of Barcelona, Institut d'Investigacions Biomèdiques August Pi i Sunyer (IDIBAPS),  
52  
53 Barcelona, Spain, Professor, dbartres@ub.edu  
54

55  
56 <sup>16</sup> Amsterdam UMC, Location VUmc, Vrije Universiteit Amsterdam, Department of Psychiatry,  
57  
58 Amsterdam Neuroscience, Amsterdam, The Netherlands, Postdoctoral Researcher,  
59  
60 l.nawijn@amsterdamumc.nl



1  
2 <sup>17</sup> Department of Medicine, Faculty of Medicine and Health Sciences and Institute of Neuroscience,  
3  
4 University of Barcelona, Institut d'Investigacions Biomèdiques August Pi i Sunyer (IDIBAPS),  
5  
6 Barcelona, Spain; csolepadulles@ub.edu  
7

8  
9 <sup>18</sup> Center for Lifespan Changes in Brain and Cognition, Department of Psychology, University of Oslo,  
10  
11 Norway, Professor, k.b.walhovd@psykologi.uio.no  
12

13  
14 <sup>19</sup> Center for Lifespan Psychology, Max Planck Institute for Human Development, Berlin, Germany,  
15  
16 Senior Research Scientist, duezel@mpib-berlin.mpg.de  
17

18  
19 <sup>20</sup> Department of General and Clinical Psychology, Professor, Vice-Rector for Research and  
20  
21 International Affairs, Lesya Ukrainka Volyn National University, larisa.zasyekina@vnu.edu.ua  
22

23  
24 <sup>21</sup> Sant Pau Memory Unit, Department of Neurology, Hospital de la Santa Creu i Sant Pau, Biomedical  
25  
26 Research Institute Sant Pau, Universitat Autònoma de Barcelona, Barcelona, Spain, Senior Scientist,  
27  
28 miulita@santpau.cat  
29

30  
31 <sup>22</sup> Women's Brain Project, c/o Pfisterwisstrasse 14, 8357 Guntershausen, Switzerland, Chief Scientific  
32  
33 Officer, mariateresa.ferretti@gmail.com  
34  
35

36  
37  
38  
39  
40 **\* Correspondence:**

41  
42  
43 Dr. Isabelle Budin-Ljøsne. Email: Isabelle.budin.ljosne@fhi.no  
44

45  
46 Norwegian Institute of Public Health  
47

48  
49 P.O.Box 222 Skøyen  
50

51  
52 NO-0213 Oslo, Norway  
53

54  
55  
56  
57 **Keywords:** Survey, brain health, perceptions, attitudes, lifestyle, cognitive health, mental health,  
58  
59 policy  
60

## ABSTRACT

**Objectives:** To investigate public perspectives on brain health.

**Design:** Cross-sectional multi-language online survey.

**Setting:** Lifebrain posted the survey on its website and social media and shared it with stakeholders.

The survey was open from June 4, 2019 until August 31, 2020.

**Participants:** N=27,590 aged  $\geq 18$  years from 81 countries in five continents completed the survey. The respondents were predominantly women (71%), middle-aged (41-60 years; 37%) or above (>60 years; 46%), highly educated (69%) and resided in Europe (98%).

**Main outcome measures:** Respondents' views were assessed regarding factors that may influence brain health, life periods considered important to look after the brain, and diseases and disorders associated with the brain. We run exploratory linear models at a 99% level of significance to assess correlates of the outcome variables, adjusting for likely confounders in a targeted fashion.

**Results:** Of all significant effects, the respondents recognized the impact of lifestyle factors on brain health but had relatively less awareness of the role socio-economic factors might play. Most respondents rated all life periods as important for the brain (95-96%), although the prenatal period was ranked significantly lower (84%). Equally, women and highly educated respondents more often rated factors and life periods to be important for brain health. Ninety-nine percent of respondents associated Alzheimer's disease and dementia with the brain. The respondents made a connection between mental health and the brain, and mental disorders such as schizophrenia and depression were significantly more often considered to be associated with the brain than neurological disorders such as stroke and Parkinson's disease. Few respondents (<32%) associated cancer, hypertension, diabetes, and arthritis with the brain.

**Conclusions:** Differences in perceptions of brain health were noted among specific segments of the population. Policies providing information about brain-friendly health behaviors and targeting people less likely to have relevant experience may be needed.

1  
2 **ARTICLE SUMMARY**  
3

4  
5 **STRENGTHS AND LIMITATIONS OF THIS STUDY**  
6

7  
8 - We recruited online an unusually large international sample of people to interrogate about their  
9 perceptions of brain health.  
10

11  
12 - The survey was developed in collaboration with representatives from national brain councils, brain  
13 foundations, and research registries interested in brain health and was made available online in 14  
15 languages.  
16  
17

18  
19 - The survey responders were not representative of the general population being mostly middle-aged  
20 or older, highly educated, female and probably already interested in brain health.  
21  
22

23  
24 - The knowledge gaps observed in this sample of largely highly educated individuals are likely to be an  
25 issue, and perhaps even to a greater degree, in the broader population  
26  
27  
28  
29  
30  
31  
32  
33  
34  
35  
36  
37  
38  
39  
40  
41  
42  
43  
44  
45  
46  
47  
48  
49  
50  
51  
52  
53  
54  
55  
56  
57  
58  
59  
60

## INTRODUCTION

Many neurological and mental conditions affect the brain's structure and function like dementia, stroke, depression, and schizophrenia, and significantly contribute to the global burden of non-communicable diseases<sup>1</sup>. The U.S. National Institute on Aging recently described brain health as the ability to *"remember, learn, plan, concentrate, and handle challenges [...] and be mentally and emotionally in balance, [...] making the most of the brain and taking care of it."*<sup>2</sup> There is increasing evidence that adopting healthy lifestyles including physical activity, having a healthy diet and good cardiovascular control, restraining from substance use, avoiding chronic stress, and perhaps getting enough sleep, may reduce risk of developing some brain diseases, although such impacts are not conclusively understood<sup>3,4</sup>.

Knowledge regarding how people perceive brain health, and what actions they are willing to take to maintain a healthy brain, is needed. In Europe, surveys aiming to investigate public perceptions of cognitive health have been conducted in Ireland<sup>5,6</sup>, the Netherlands<sup>7</sup>, and the United Kingdom<sup>8</sup>, and suggest limited knowledge and awareness of dementia, dementia risk, and factors contributing to cognitive decline. Studies conducted in France<sup>9</sup> and the United Kingdom<sup>10</sup> reported a lack of understanding of some mental disorders such as schizophrenia, bipolar disorders, and autism. In Slovenia, a recent survey reported that, despite awareness of the importance of brain health, lay people were unlikely to adopt purposefully behaviors beneficial for the brain due to lack of time and information<sup>11</sup>. Qualitative studies conducted in the United Kingdom<sup>12,13</sup> and elsewhere in Europe<sup>14</sup>, showed varying awareness of actions beneficial for the brain, and emphasized the importance of providing people with evidence-based and trustworthy information to encourage adoption of brain-friendly behaviors. Studies conducted in Australia and New Zealand have also reported limited knowledge about cognitive health and Alzheimer's disease<sup>15</sup> and potential measures to reduce risk of dementia and cognitive decline<sup>16-19</sup>. A 2015 systematic review of public perceptions about risk and protective factors for cognitive health and impairment concluded that although some awareness was

1  
2 present regarding risk factors for cognitive impairment, efforts should be made to provide the general  
3  
4 public with accurate information regarding risk reducing strategies<sup>20</sup>.  
5

6  
7 These studies offer useful insights to understand public perceptions of brain health but usually were  
8  
9 conducted at national level and included samples of limited size. They often focused on one specific  
10  
11 aspect of brain health, such as cognitive health or a mental illness, used different measures and  
12  
13 instruments, and did not share a common definition of brain health, making a comparison of results  
14  
15 between studies challenging. Investigating perceptions of brain health in a larger sample and exploring  
16  
17 how views may differ depending on gender, age, and education, will provide new and useful  
18  
19 knowledge to guide brain health promotion. If there is a mismatch between what people consider  
20  
21 important and what the best available evidence suggests, there may be considerable public health  
22  
23 gains to explain the benefits or dangers of certain factors, especially those that could be acted on by  
24  
25 the individual.  
26  
27  
28

29  
30 In June 2019, the Lifebrain consortium<sup>21</sup> launched the “Global Brain Health Survey.”<sup>22</sup> Lifebrain is a  
31  
32 European consortium including 16 partners and data from brain imaging cohorts in eight European  
33  
34 countries, totaling approximately 6,000 research participants<sup>23</sup>. We aimed to investigate the  
35  
36 perspectives of participants in the Lifebrain cohorts and members of the public on brain health. The  
37  
38 survey was conducted online and featured as “global” to invite anyone interested in the topic of brain  
39  
40 health to take the survey irrespective of geographical location. The survey included four overall  
41  
42 themes: perception of some aspects of brain health (reported here), interest in undertaking brain  
43  
44 health tests, motivations to look after one’s brain<sup>24</sup>, and support needed to make lifestyle changes  
45  
46 beneficial for the brain<sup>25</sup>. In this paper, we report responses to survey questions relating to: (1) factors  
47  
48 believed to influence brain health, (2) specific life periods considered important to look after one’s  
49  
50 brain, and (3) diseases and disorders associated with the brain. Whereas extrapolating from responses  
51  
52 in this convenience sample to the general population will not be feasible considering the sample  
53  
54 characteristics in different countries, we adjust results for confounding variables, such as age and  
55  
56 education where appropriate.  
57  
58  
59  
60

## METHODS

A detailed description of the survey's background and design, technical platform as well as a summary of the main questionnaire has been published elsewhere<sup>22</sup>. In brief, the survey included 16 multiple-choice questions addressing brain health perceptions and 12 questions on demographics. The questions were developed using an interview guide from a previous qualitative interview study, where we investigated Lifebrain research participants' perceptions of brain health<sup>26</sup>. The survey was translated to 14 languages, including English, Danish, Spanish, French, Norwegian, Catalan, German, Swedish, Hungarian, Ukrainian, Italian, Dutch, Chinese (simplified mandarin), and Turkish. The study applied the procedure of back translation. The survey was made freely available online from the Lifebrain website: [www.lifebrain.uio.no](http://www.lifebrain.uio.no), was anonymous and took approximately 15-20 minutes to complete. No financial compensation was provided to respondents. On the introductory survey page, the U.S. National Institute on Aging's description of brain health was provided<sup>2</sup>. The survey was available from June 2019 and was closed 31 August 2020. To be able to submit their questionnaire, the respondents had to consent to the use of their data for research and complete at least five multiple-choice questions and the 12 demographic questions.

### Patient and public involvement (PPI)

The draft survey questionnaire was shared and discussed with representatives from patient organizations and national brain councils<sup>27</sup> in Europe, Lifebrain researchers and cohort participants, and members of the public who participated in Lifebrain stakeholder workshops and public lectures in Spain, Norway, and the United Kingdom. Their suggestions for improvement were integrated in later versions of the questionnaire. The questionnaire was also shared with national brain councils in Norway, Belgium, and Germany, and brain foundations, and some agreed to become official co-organizers of the survey.

## Sampling

The survey was primarily distributed via the Lifebrain cohorts' websites, social media, and E-newsletters, and with help from approximately 20 to 25 European organizational stakeholders in the consortium network. National brain councils, brain foundations, universities, research projects, professional societies, patient organizations and charities, and research registries, whose mission is to match interested volunteers with research groups, invited their members to take the survey. In addition, Lifebrain researchers posted the survey on their websites and social media, and distributed leaflets presenting the survey at conferences, scientific events, in public libraries, and hospital waiting rooms. The survey was also featured in Scandinavian media<sup>28 29</sup>. As the survey was freely available online, it is likely that it has been shared by other stakeholders outside of Europe.

## Measures

We used three of the 16 multiple-choice questions in the survey questionnaire providing information about perceptions of brain health, and 12 demographic questions. The three multiple-choice questions were not mandatory and could be skipped by the respondents, whereas the 12 demographic questions were mandatory. For each multiple-choice question, respondents could endorse any number of items.

### *Factors influencing brain health*

The first question was: "In your opinion, to what extent do the following influence brain health?." A list of 11 factors was provided including physical health, diet, physical environment (e.g., air pollution, noise), social environment (e.g., family, social network), education, profession, family income, genetics and family medical history, substance use (e.g., alcohol, smoking and drugs), sleeping habits and having goals that make life meaningful. The respondents could rate the factors using a 5-item Likert scale (very strong, strong, moderate, weak, or no influence).

### *Specific life periods to look after one's brain*

1  
2 The second question was: "In your opinion, at what stages in life is it important to look after one's  
3 brain?" Respondents could rate six life periods: in the womb (before birth), childhood (from birth to  
4 12 years), adolescence (13-18 years), young adulthood (19-45 years), middle age (46-65 years) and old  
5 12 years), adolescence (13-18 years), young adulthood (19-45 years), middle age (46-65 years) and old  
6 age (over 65 years), using a 4-item Likert scale (very important, important, moderately important, not  
7 important).  
8  
9  
10  
11  
12

### 13 *Diseases and disorders associated with the brain*

14  
15  
16 The third question was: "Which of the following diseases/disorders do you associate with the brain?."  
17 A list of 13 disorders was provided, of which 10 are recognized brain disorders (i.e., Alzheimer's disease  
18 and other forms of dementia, bipolar disorder, schizophrenia, Parkinson's disease, addiction, stroke,  
19 depression, migraine, anxiety, cancer), and 3 are known to have an impact on the brain (i.e., diabetes,  
20 arthritis, and hypertension). When listing cancer, we did not specify whether it referred to brain cancer  
21 or other types of cancer.  
22  
23  
24  
25  
26  
27  
28  
29

### 30 *Demographic questions*

31  
32  
33 The respondents were asked about their age category (18-25, 26-40, 41-60, 61-70, 71-80, over 80),  
34 gender (male, female, other, prefer not to tell), highest attained educational qualification (primary  
35 school, special educational school, secondary school, vocational training, university/college degree),  
36 relationship/civil status (single, in a stable relationship but not married, married, divorced or  
37 separated, or widowed), and occupational status (employed for wages or self-employed, unemployed,  
38 homemaker, student, retired, unable to work, or doing unpaid or voluntary work). The respondents  
39 were also asked to rate their ability to think, remember and learn (hereafter referred to as self-  
40 reported *cognitive health*) as well as their ability to be mentally and emotionally in balance (hereafter  
41 referred to as self-reported *mental health*) using a 5-item Likert scale (excellent, above average,  
42 average, below average, very poor). Finally, we asked for information about country of residence,  
43 previous experience of participating in brain research (yes, no), educational or work experience in  
44 health care (yes, no), experience of long-standing illness, disability, or health problem (yes, no), and  
45 experience of looking after a family member with brain disease (yes, no).  
46  
47  
48  
49  
50  
51  
52  
53  
54  
55  
56  
57  
58  
59  
60



## Statistical analysis

Exploratory linear models were performed on all survey questions presented applying R version 4.1.0<sup>30</sup>. Ten models were used per response category, exploring the relationship between demographic characteristics and responses. We report binarized responses and odds ratios for the purposes of communication and simplicity. However, we are aware of the potential pitfalls<sup>31</sup> so for purposes of robustness, we also report data modelled as continuous in the supplementary materials, and note general agreement between the binary and continuous models (see **supplementary material 1**). Complete detailed descriptive statistics are provided for all questions in **supplementary material 2** and the continuous, binary, and ordinal models for question 1 and question 2 are provided in **supplementary material 3**. Only responses from submitted questionnaires were used in the analysis.

For the first question (factors influencing brain health), responses of “very strong” and “strong” were classified as indicating an association between the question and response category, while the remaining options (“moderate,” “weak” and “no influence”) were categorized as indicating no association. Similarly, in the second question (life periods to take care of one’s brain), responses of “very important” and “important” were classified as indicating that respondents considered the life period as important to take care of the brain, indicating a positive association between the question and response category, whereas responses of the remaining “moderately important” and “not important”) were classified as indicating that the respondents considered the life period as not so important or not important. The third question was already on a binary scale, where responses were logged by selecting from a list of diseases and disorders associated with brain health. For each category, separate predictive logistic regression models for (1) age, (2) gender, (3) education, (4) relationship status, (5) experience or education in health care, (6) experience with illness, (7) experience of being a caregiver for someone with a brain disease, (8) rating of own cognitive health, and (9) rating of own mental health as predictors were computed.

Demographic variables with more than 3 response categories were reduced to aid interpretation of results. Education was reduced to whether the subject had higher education (university degree) or not.

1  
2 Age was reduced to three categories, “youngest” (those below 40 years), “middle-aged” (those  
3  
4 between 40 and 60 years) and “oldest” (those above 60 years, the largest response group). Gender  
5  
6 was reduced to three categories, “woman,” “man” and “other/prefer not to tell.” The ratings of  
7  
8 subjects’ own mental and cognitive health were reduced to two categories, one for those rating their  
9  
10 health as average or above, and those rating their health as below average. Relationship was reduced  
11  
12 to those being in a stable relationship (married and domestic partnerships) or not. The base  
13  
14 comparison groups for each predictor variable were set as the category where there was the highest  
15  
16 number of subjects.  
17  
18

19  
20 The very large sample size with high statistical power made it very likely that group differences  
21  
22 apparent on inspection of numbers were statistically significant. This means that many statistically  
23  
24 significant results may not be of practical importance. We report results significant at the 1% level of  
25  
26 probability, with false-discovery-rate (FDR) correction across all models and covariates for each  
27  
28 outcome variable. We used multivariable testing with logistic regression to adjust results only for  
29  
30 questions 1 and 2 adjusting the observed sex effect for age and education. Similarly, in question 3 we  
31  
32 controlled the ‘stable relationship effect’ for age and education. Finally, the STROBE cross sectional  
33  
34 reporting guidelines were used<sup>32</sup>.  
35  
36  
37  
38  
39  
40  
41

## 42 **RESULTS**

### 43 **Respondent characteristics**

44  
45 In total, 27,590 respondents from 81 countries completed the survey. 99.9% of respondents  
46  
47 (n=27,552) completed the first question, 99.8% (n=27,536) completed the second question and  
48  
49 99.8% (n=27,530) completed the third question. All respondents completed the demographic  
50  
51 questions.  
52  
53  
54  
55  
56  
57  
58

### 59 **Table 1. Number of respondents by country**

| Country                              | No of respondents | % of total |
|--------------------------------------|-------------------|------------|
| United Kingdom                       | 10,160            | 36.8       |
| Netherlands                          | 7,023             | 25.5       |
| Norway                               | 3,549             | 12.9       |
| Spain                                | 2,095             | 7.6        |
| Denmark                              | 1,101             | 4.0        |
| Germany                              | 1,060             | 3.8        |
| Sweden                               | 760               | 2.8        |
| Italy                                | 311               | 1.1        |
| Ukraine                              | 311               | 1.1        |
| Hungary                              | 187               | 0.7        |
| USA                                  | 165               | 0.6        |
| Slovenia                             | 148               | 0.5        |
| Turkey                               | 139               | 0.5        |
| Belgium                              | 115               | 0.4        |
| Other (<100 respondents per country) | 466               | 1.7        |
| <b>Total</b>                         | <b>27,590</b>     | <b>100</b> |

**Table 1** provides an overview of the number of respondents by country. The respondents predominantly lived in Europe (98%) including the United Kingdom (36.8%), the Netherlands (25.5%), Norway (12.9%), Spain (7.6%), Denmark (4.0%), Germany (3.8%), and Sweden (2.8%). Respondents outside Europe primarily resided in the United States (0.6%) and Turkey (0.5%). Due to large variation in the number of responses between countries, and varying recruitment strategies from one country to another, making meaningful comparisons of responses between countries is hardly feasible. We thus only provide, below, results for the whole sample across countries.

**Table 2** provides an overview of the demographic characteristics of the whole sample. The respondents were predominantly middle-aged (41-60: 37.4%) or older (>60: 46.2%), women (71.1%), married or in a relationship (71.8%) and highly educated (68.6%). About half of respondents (51.4%) reported being in paid employment and a third (38.5%) having an educational or employment experience in health care. The respondents largely rated their cognitive health (93.9%) and their mental health (86.8%) as average or above average. 40.4% of respondents reported having a long-standing illness, disability, or health problem. 46.5% reported having an experience of looking after a family member with brain disease, and 43.2% an experience of participating in brain research. A majority of respondents (57%) had been recruited through the research registries Join Dementia

1  
2 Research<sup>33</sup> in the United Kingdom and Hersenonderzoek.nl<sup>34</sup> in the Netherlands. The demographic  
3  
4 characteristics of respondents in the seven European countries with most responses is provided in  
5  
6 **supplementary material 4.**  
7  
8  
9  
10  
11  
12  
13  
14  
15  
16  
17  
18  
19  
20  
21  
22  
23  
24  
25  
26  
27  
28  
29  
30  
31  
32  
33  
34  
35  
36  
37  
38  
39  
40  
41  
42  
43  
44  
45  
46  
47  
48  
49  
50  
51  
52  
53  
54  
55  
56  
57  
58  
59  
60

For peer review only

**Table 2. Demographic characteristics of the whole sample**

| <b>Respondents</b>                                           | <b>No of respondents</b> | <b>%</b>     |
|--------------------------------------------------------------|--------------------------|--------------|
| <b>Gender</b>                                                |                          |              |
| Women                                                        | 19,626                   | 71.1         |
| Men                                                          | 7,833                    | 28.4         |
| Other                                                        | 131                      | 0.5          |
| <b>Total</b>                                                 | <b>27,590</b>            | <b>100.0</b> |
| <b>Age range (years)</b>                                     |                          |              |
| 18 – 40                                                      | 4,502                    | 16.4         |
| 41 – 60                                                      | 10,328                   | 37.4         |
| > 60                                                         | 12,760                   | 46.2         |
| <b>Education</b>                                             |                          |              |
| Higher education                                             | 18,925                   | 68.6         |
| Lower education                                              | 8,665                    | 31.4         |
| <b>Relationship status</b>                                   |                          |              |
| Yes                                                          | 19,819                   | 71.8         |
| No                                                           | 7,771                    | 28.2         |
| <b>Occupation*</b>                                           |                          |              |
| Employed for wages                                           | 14,181                   | 51.4         |
| Retired                                                      | 10,550                   | 38.2         |
| Other                                                        | 9,708                    | 35.2         |
| <b>Employment and/or education in health care</b>            |                          |              |
| No                                                           | 16,955                   | 61.5         |
| Yes                                                          | 10,635                   | 38.5         |
| <b>Participation in brain research</b>                       |                          |              |
| No                                                           | 15,671                   | 56.8         |
| Yes                                                          | 11,919                   | 43.2         |
| <b>Self-rated cognitive health</b>                           |                          |              |
| Below average                                                | 1,661                    | 6.1          |
| Average or above average                                     | 25,929                   | 93.9         |
| <b>Self-rated mental health</b>                              |                          |              |
| Below average                                                | 3,632                    | 13.2         |
| Average or above average                                     | 23,958                   | 86.8         |
| <b>Experience of illness, disability, or health problem</b>  |                          |              |
| No                                                           | 16,451                   | 59.6         |
| Yes                                                          | 11,139                   | 40.4         |
| <b>Experience as caregiver of patient with brain disease</b> |                          |              |
| No                                                           | 14,762                   | 53.5         |
| Yes                                                          | 12,828                   | 46.5         |

\* Percentages add up to >100% and N>27590 because multiple responses were allowed

## Factors influencing brain health

**Figure 1** shows how many respondents rated each factor as having strong or very strong influence on brain health. Most respondents rated substance use (92% of participants), physical health (87%), sleeping habits (85%), social environment (83%) and genetics (83%) as having a strong/very strong influence on brain health, followed by life goals (72%), physical environment (72%), diet (71%), and socio-economic factors such as education (61%), profession (56%) and income (36%). Other respondents rated the factors as having a moderate, weak or no influence on brain health. A detailed description of how factors were rated by all respondents according to a 5-item Likert scale is provided in the **supplementary material 2**, section 1.1 to 1.11).

Differences in response patterns were observed between demographic groups of respondents (**Table 3**). Men were less likely than women to consider factors such as substance use (odds ratio (OR) 0.66, 99% confidence interval (CI) 0.58-0.74), sleeping habits (OR 0.68, 99% CI 0.62-0.74) and diet (OR 0.70, 99% CI 0.65-0.75) as having strong or very strong influence on the brain. In contrast, men were more prone to rate profession (OR 1.18, 99% CI 1.10-1.27) and education (OR 1.13, 99% CI 1.05-1.21) as important. After controlling for educational level and age, these effects remained significant. Respondents with low education put less emphasis on factors such as education (OR 0.62, 99% CI 0.58-0.66), physical health (OR 0.73, 99% CI 0.66-0.81), profession (OR 0.75, 99% CI 0.71-0.81) and substance use (OR 0.75, 99% CI 0.67-0.85) as compared with highly educated respondents. However, they had higher odds of considering income (OR 1.11, 99% CI 1.04-1.19) and physical environment (OR 1.06, 99% CI 0.98-1.14) as having a strong/very strong influence on brain health.

Respondents older than 60 years gave more importance to income than participants below 40 years of age (OR 0.81, 99% CI 0.73-0.89) and respondents aged 41 to 60 years (OR 0.98, 99% CI 0.91-1.05). The same was observed for having meaningful goals in life. In contrast, importance given to sleep decreased with age and respondents below 40 years of age (OR 2.78, 99% CI 2.39-3.23), and respondents aged 41-60 years (OR 2.06, 99% CI 1.87-2.28) more often rated sleep as having a

1  
2 strong/very strong influence on brain health as compared with the respondents older than 60 years.  
3  
4 The same accounted for factors such as social environment, diet, and profession.  
5  
6  
7 Respondents with a higher education level, respondents with a reported education or experience in  
8  
9 health care, respondents who self-rated their cognitive and mental health as average or above, and  
10  
11 women were more prone to rate all factors as having a strong or very strong influence on brain health  
12  
13 (see **supplementary material 5**, section 1). In contrast, respondents who self-rated their cognitive and  
14  
15 mental health as below average were less likely to rate all factors as having a strong or very strong  
16  
17 influence on brain health, with one notable exception. Respondents rating their mental health as  
18  
19 below average were more likely to rate sleep as important (OR 1.33, 99% CI 1.16-1.53) as compared  
20  
21 with respondents rating their mental health as average or above. Likewise, respondents in a stable  
22  
23 relationship were less prone to rate sleep as important (OR 0.81, 99% CI 0.74-0.89), and more prone  
24  
25 to rate genetics as important (OR 1.20, 99% CI 1.11-1.31) as compared with other respondents not in  
26  
27 a stable relationship.  
28  
29  
30  
31  
32  
33  
34  
35  
36  
37  
38  
39  
40  
41  
42  
43  
44  
45  
46  
47  
48  
49  
50  
51  
52  
53  
54  
55  
56  
57  
58  
59  
60

**Table 3 – Factors believed to have a strong influence on brain health by demographic groups. Univariate odd ratios (OR) and 99% confidence intervals (CI).**

| Variable         | Characteristics   | Substance use        |      |           | Genetics           |      |           | Physical health |      |           |
|------------------|-------------------|----------------------|------|-----------|--------------------|------|-----------|-----------------|------|-----------|
|                  |                   | %                    | OR   | 99% CI    | %                  | OR   | 99%CI     | %               | OR   | 99%CI     |
| Gender           | Women             | 93.3                 |      |           | 83.4               |      |           | 88.3            |      |           |
|                  | Men               | 90.1                 | 0.66 | 0.58-0.74 | 80.0               | 0.79 | 0.73-0.87 | 85.3            | 0.77 | 0.70-0.85 |
|                  | Other/Undisclosed | 85.8                 | 0.44 | 0.23-0.84 | 69.8               | 0.46 | 0.28-0.76 | 85.0            | 0.75 | 0.39-1.43 |
| Age              | >60 years         | 90.5                 |      |           | 83.4               |      |           | 86.6            |      |           |
|                  | 41-60 years       | 94.2                 | 1.70 | 1.49-1.95 | 83.6               | 1.01 | 0.92-1.11 | 88.1            | 1.14 | 1.03-1.26 |
|                  | <40 years         | 93.2                 | 1.43 | 1.20-1.69 | 76.6               | 0.65 | 0.58-0.72 | 88.4            | 1.17 | 1.02-1.34 |
| Education        | Higher education  | 93.0                 |      |           | 82.6               |      |           | 88.6            |      |           |
|                  | Lower education   | 90.9                 | 0.75 | 0.67-0.85 | 81.8               | 0.94 | 0.87-1.03 | 85.0            | 0.73 | 0.66-0.81 |
| Health care exp. | No                | 91.3                 |      |           | 81.7               |      |           | 85.7            |      |           |
|                  | Yes               | 94.0                 | 1.50 | 1.32-1.70 | 83.4               | 1.12 | 1.03-1.22 | 90.2            | 1.53 | 1.39-1.70 |
| Variable         | Characteristics   | Sleeping habits      |      |           | Social environment |      |           | Life goals      |      |           |
|                  |                   | %                    | OR   | 99% CI    | %                  | OR   | 99% CI    | %               | OR   | 99%CI     |
| Gender           | Women             | 86.5                 |      |           | 84.1               |      |           | 73.5            |      |           |
|                  | Men               | 81.3                 | 0.68 | 0.62-0.74 | 79.2               | 0.72 | 0.66-0.79 | 71.1            | 0.89 | 0.82-0.96 |
|                  | Other/Undisclosed | 87.4                 | 1.08 | 0.54-2.16 | 90.4               | 1.79 | 0.81-3.91 | 70.9            | 0.88 | 0.53-1.46 |
| Age              | >60 years         | 79.6                 |      |           | 79.9               |      |           | 74.3            |      |           |
|                  | 41-60 years       | 89.0                 | 2.06 | 1.87-2.28 | 84.1               | 1.33 | 1.22-1.46 | 73.3            | 0.95 | 0.88-1.03 |
|                  | <40 years         | 91.6                 | 2.78 | 2.39-3.23 | 87.3               | 1.73 | 1.52-1.97 | 67.2            | 0.71 | 0.64-0.78 |
| Education        | Higher education  | 85.8                 |      |           | 83.6               |      |           | 73.2            |      |           |
|                  | Lower education   | 83.4                 | 0.83 | 0.76-0.91 | 80.9               | 0.83 | 0.76-0.91 | 71.9            | 0.94 | 0.87-1.01 |
| Health care exp. | No                | 83.6                 |      |           | 80.6               |      |           | 70.9            |      |           |
|                  | Yes               | 87.3                 | 1.35 | 1.23-1.48 | 86.1               | 1.48 | 1.36-1.62 | 75.7            | 1.28 | 1.19-1.37 |
| Variable         | Characteristics   | Physical environment |      |           | Diet               |      |           | Education       |      |           |
|                  |                   | %                    | OR   | 99%CI     | %                  | OR   | 99%CI     | %               | OR   | 99%CI     |
| Gender           | Women             | 72.7                 |      |           | 73.7               |      |           | 59.8            |      |           |
|                  | Men               | 69.6                 | 0.86 | 0.80-0.93 | 66.2               | 0.70 | 0.65-0.75 | 62.7            | 1.13 | 1.05-1.21 |
|                  | Other/Undisclosed | 77.8                 | 1.31 | 0.76-2.29 | 72.4               | 0.94 | 0.56-1.57 | 64.6            | 1.22 | 0.76-1.98 |
| Age              | >60 years         | 69.8                 |      |           | 66.7               |      |           | 60.9            |      |           |
|                  | 41-60 years       | 74.3                 | 1.25 | 1.16-1.35 | 75.6               | 1.54 | 1.43-1.67 | 59.2            | 0.93 | 0.87-1.00 |
|                  | <40 years         | 71.7                 | 1.10 | 0.99-1.21 | 76.1               | 1.59 | 1.44-1.77 | 63.4            | 1.11 | 1.01-1.22 |
| Education        | Higher education  | 71.5                 |      |           | 73.1               |      |           | 64.3            |      |           |
|                  | Lower education   | 72.6                 | 1.06 | 0.98-1.14 | 68.2               | 0.79 | 0.73-0.85 | 52.6            | 0.62 | 0.58-0.66 |
| Health care exp. | No                | 70.5                 |      |           | 69.0               |      |           | 58.0            |      |           |
|                  | Yes               | 74.0                 | 1.19 | 1.11-1.28 | 75.6               | 1.39 | 1.29-1.49 | 64.8            | 1.33 | 1.25-1.42 |
| Variable         | Characteristics   | Profession           |      |           | Income             |      |           |                 |      |           |
|                  |                   | %                    | OR   | 99%CI     | %                  | OR   | 99%CI     |                 |      |           |
| Gender           | Women             | 54.6                 |      |           | 36.2               |      |           |                 |      |           |
|                  | Men               | 58.7                 | 1.18 | 1.10-1.27 | 35.0               | 0.95 | 0.88-1.02 |                 |      |           |
|                  | Other/Undisclosed | 54.3                 | 0.99 | 0.62-1.57 | 40.2               | 1.18 | 0.74-1.89 |                 |      |           |
| Age              | >60 years         | 53.2                 |      |           | 36.8               |      |           |                 |      |           |
|                  | 41-60 years       | 57.0                 | 1.16 | 1.08-1.24 | 36.3               | 0.98 | 0.91-1.05 |                 |      |           |
|                  | <40 years         | 60.2                 | 1.33 | 1.21-1.46 | 32.0               | 0.81 | 0.73-0.89 |                 |      |           |
| Education        | Higher education  | 58.0                 |      |           | 35.1               |      |           |                 |      |           |
|                  | Lower education   | 51.0                 | 0.75 | 0.71-0.81 | 37.5               | 1.11 | 1.04-1.19 |                 |      |           |
| Health care exp. | No                | 53.9                 |      |           | 33.5               |      |           |                 |      |           |
|                  | Yes               | 58.8                 | 1.23 | 1.15-1.31 | 39.6               | 1.30 | 1.22-1.39 |                 |      |           |

% indicates proportion of participants rating this factor as having a 'strong' or 'very strong' influence on brain health, with the remainder of participants rating it as 'moderate,' 'weak' or 'no influence.'



## Life periods to look after ones' brain

**Figure 2** shows that the respondents rated most life periods as important or very important for the brain (95-96%), whereas the prenatal stage (in the womb/before birth) was rated as important or very important by 84% of respondents (**supplementary material 2**, section 2).

**Table 4** shows that men were less likely to consider life periods such as the middle age (OR 0.41, 99% CI 0.35-0.48) and old age (OR 0.41, 99% CI 0.35-0.49) as important as compared with women. This was also observed when controlling for age and education. Respondents with lower education were also less likely to rate life periods as important as compared with higher educated respondents, except for young adulthood (OR 1.06, 99% CI 0.90-1.24). The youngest respondents (<40) were less likely to consider middle age (OR 0.82, 99% CI 0.67-1.00) and old age as important (OR 0.55, 99% CI 0.45-0.67) compared with the oldest respondents (>60). Rather, the youngest respondents were more likely to consider childhood (OR 1.89, 99% CI 1.51-2.37) and adolescence important (OR 2.14, 99% CI 1.60-2.85) as compared with the oldest respondents (>60).

Respondents with an education or experience in health care were more prone to consider the life periods as important, especially pregnancy (OR 1.91, 99% CI 1.74-2.10) and childhood (OR 2.06, 99% CI 1.74-2.43) as compared with other respondents with no experience (**supplementary material 5**, section 2). Respondents with lower education were consistently less likely to consider the life periods as important as compared with respondents with higher education, except for young adulthood, which they were more likely to consider important as compared with the highly educated (OR 1.06, 99% CI 0.90-1.24). Respondents in a stable relationship were more prone to consider important taking care of the brain in old age (OR 1.21, 99% CI 1.03-1.41) as compared with respondents not in a stable relationship.

**Table 4 – Life periods considered important to take care of one’s brain by demographic groups.  
Univariate OR and 99% CI.**

| Variable         | Characteristics   | In the womb             |      |           | Childhood (0-12)   |      |           | Adolescence (13-18) |      |           |
|------------------|-------------------|-------------------------|------|-----------|--------------------|------|-----------|---------------------|------|-----------|
|                  |                   | %                       | OR   | 99% CI    | %                  | OR   | 99%CI     | %                   | OR   | 99%CI     |
| Gender           | Women             | 85.9                    |      |           | 95.7               |      |           | 97.0                |      |           |
|                  | Men               | 78.0                    | 0.58 | 0.53-0.63 | 93.0               | 0.59 | 0.51-0.69 | 95.6                | 0.68 | 0.57-0.81 |
|                  | Other/Undisclosed | 86.4                    | 1.04 | 0.53-2.04 | 95.2               | 0.89 | 0.30-2.63 | 96.0                | 0.75 | 0.23-2.44 |
| Age              | >60 years         | 80.7                    |      |           | 93.4               |      |           | 95.5                |      |           |
|                  | 41-60 years       | 86.2                    | 1.49 | 1.36-1.64 | 96.2               | 1.78 | 1.51-2.09 | 97.3                | 1.71 | 1.41-2.08 |
|                  | <40 years         | 86.1                    | 1.48 | 1.31-1.68 | 96.4               | 1.89 | 1.51-2.37 | 97.9                | 2.14 | 1.60-2.85 |
| Education        | Higher education  | 86.0                    |      |           | 95.8               |      |           | 97.0                |      |           |
|                  | Lower education   | 78.5                    | 0.59 | 0.54-0.65 | 92.9               | 0.57 | 0.50-0.66 | 95.6                | 0.67 | 0.56-0.80 |
| Health care exp. | No                | 80.5                    |      |           | 93.7               |      |           | 95.9                |      |           |
|                  | Yes               | 88.8                    | 1.91 | 1.74-2.10 | 96.8               | 2.06 | 1.74-2.43 | 97.7                | 1.79 | 1.48-2.18 |
| Variable         | Characteristics   | Young adulthood (19-45) |      |           | Middle age (45-65) |      |           | Old age (>65)       |      |           |
|                  |                   | %                       | OR   | 99% CI    | %                  | OR   | 99%CI     | %                   | OR   | 99%CI     |
| Gender           | Women             | 96.2                    |      |           | 97.0               |      |           | 97.1                |      |           |
|                  | Men               | 93.4                    | 0.56 | 0.48-0.65 | 93.0               | 0.41 | 0.35-0.48 | 93.2                | 0.41 | 0.35-0.49 |
|                  | Other/Undisclosed | 92.8                    | 0.51 | 0.21-1.24 | 88.8               | 0.24 | 0.12-0.51 | 92.0                | 0.35 | 0.15-0.82 |
| Age              | >60 years         | 94.5                    |      |           | 95.3               |      |           | 96.2                |      |           |
|                  | 41-60 years       | 96.5                    | 1.59 | 1.34-1.89 | 97.2               | 1.68 | 1.40-2.03 | 96.8                | 1.19 | 0.98-1.43 |
|                  | <40 years         | 95.4                    | 1.21 | 0.98-1.50 | 94.3               | 0.82 | 0.67-1.00 | 93.3                | 0.55 | 0.45-0.67 |
| Education        | Higher education  | 95.3                    |      |           | 95.9               |      |           | 96.2                |      |           |
|                  | Lower education   | 95.6                    | 1.06 | 0.90-1.24 | 95.6               | 0.93 | 0.78-1.09 | 95.3                | 0.80 | 0.67-0.94 |
| Health care exp. | No                | 94.7                    |      |           | 95.2               |      |           | 95.4                |      |           |
|                  | Yes               | 96.6                    | 1.60 | 1.36-1.89 | 96.8               | 1.53 | 1.29-1.82 | 96.7                | 1.41 | 1.19-1.68 |

% indicates proportion of participants rating this life period as ‘important’ or ‘very important,’ with the remainder of participants rating it as ‘not important’ or ‘moderately important.’

### Diseases and disorders associated with the brain

Figure 3 shows that 99% of the respondents associated Alzheimer’s disease (AD) and other forms of dementia with the brain. The next most often selected disorders were mental disorders like schizophrenia (96%), depression (95%), bipolar disorder (92%), anxiety (91%), and addiction (88%). Disorders least often associated with the brain included cancer (32%), hypertension (32%), diabetes (16%), and arthritis (5%).

Women were more likely than men to associate the diseases with the brain, and this was particularly observed for bipolar disorder (OR 0.47, 99% CI 0.42-0.53), stroke (OR 0.53, 99% CI 0.48-0.58) and schizophrenia (OR 0.64, 99% CI 0.54-0.75) (Table 5). A similar trend was observed among lower educated respondents, who were less likely to select disorders such as bipolar disorder (OR 0.42, 99% CI 0.38-0.47) and AD/dementia (OR 0.48, 99% CI 0.34-0.67) as compared with highly educated respondents.

1  
2 The youngest respondents (aged <40) were less likely to associate with the brain diseases often  
3  
4 appearing in old age such as AD/dementia (OR 0.35, 99% CI 0.23-0.51), stroke (OR 0.76, 99% CI 0.67-  
5  
6 0.87), hypertension (OR 0.65, 99% CI 0.59-0.72), and Parkinson's disease (OR 0.80, 99% CI 0.71-0.91),  
7  
8 as compared with respondents aged >60. In contrast, they more often selected disorders such as  
9  
10 migraine (OR 2.18, 99% CI 1.91-2.48) and bipolar disorder (OR 1.90, 99% CI 1.59-2.26), addiction (OR  
11  
12 1.50, 99% CI 1.29-1.74) or anxiety (OR 1.44, 99% CI 1.23-1.70) as compared with respondents aged  
13  
14 >60.  
15  
16

17  
18 Respondents who self-assessed their mental health to be below average were less likely to associate  
19  
20 the given diseases/disorders above with the brain as compared with other respondents, although they  
21  
22 had higher odds of considering mental disorders such as anxiety (OR 1.51, 99% CI 1.26-1.82),  
23  
24 depression (OR 1.40, 99% CI 1.10-1.78), bipolar disorder (OR 1.29, 99% CI 1.07-1.55) and addiction (OR  
25  
26 1.12, 99% CI 0.97-1.30) as associated with the brain. Respondents with an experience of disease were  
27  
28 more likely, as compared with others with no such experience, to associate disorders such as arthritis  
29  
30 (OR 1.59, 99% CI 1.38-1.84), diabetes (OR 1.25, 99% CI 1.15-1.37) and hypertension (OR 1.20, 99% CI  
31  
32 1.12-1.29) with the brain (**supplementary material 5**, section 3). Respondents in a stable relationship  
33  
34 were more likely to associate Alzheimer's disease with the brain (OR 1.91, 99% CI 1.36-2.68) as  
35  
36 compared with respondents not in a stable relationship. However, this association did not hold when  
37  
38 controlling for age and education level.  
39  
40  
41  
42  
43  
44  
45  
46  
47  
48  
49  
50  
51  
52  
53  
54  
55  
56  
57  
58  
59  
60

**Table 5 – Diseases and disorders associated with the brain by demographic groups. Univariate OR and 99%CI.**

| Variable         | Characteristics   | AD and dementia  |      |           | Schizophrenia                                                                                                                                                                                  |      |           | Depression |      |           |
|------------------|-------------------|------------------|------|-----------|------------------------------------------------------------------------------------------------------------------------------------------------------------------------------------------------|------|-----------|------------|------|-----------|
|                  |                   | %                | OR   | 99% CI    | %                                                                                                                                                                                              | OR   | 99%CI     | %          | OR   | 99%CI     |
| Gender           | Women             | 99.4             |      |           | 96.4                                                                                                                                                                                           |      |           | 95.6       |      |           |
|                  | Men               | 98.5             | 0.40 | 0.29-0.56 | 94.5                                                                                                                                                                                           | 0.64 | 0.54-0.75 | 93.8       | 0.70 | 0.60-0.81 |
|                  | Other/Undisclosed | 100              |      |           | 95.2                                                                                                                                                                                           | 0.74 | 0.25-2.18 | 96.0       | 1.11 | 0.34-3.61 |
| Age              | >60 years         | 99.3             |      |           | 95.1                                                                                                                                                                                           |      |           | 94.2       |      |           |
|                  | 41-60 years       | 99.4             | 1.08 | 0.71-1.65 | 96.6                                                                                                                                                                                           | 1.47 | 1.23-1.75 | 96.1       | 1.51 | 1.29-1.78 |
|                  | <40 years         | 98.0             | 0.35 | 0.23-0.51 | 96.3                                                                                                                                                                                           | 1.34 | 1.06-1.69 | 95.4       | 1.29 | 1.05-1.59 |
| Education        | Higher education  | 99.3             |      |           | 96.5                                                                                                                                                                                           |      |           | 95.6       |      |           |
|                  | Lower education   | 98.6             | 0.48 | 0.34-0.67 | 94.5                                                                                                                                                                                           | 0.62 | 0.53-0.72 | 94.0       | 0.72 | 0.62-0.84 |
| Health care exp. | No                | 98.9             |      |           | 95.3                                                                                                                                                                                           |      |           | 94.6       |      |           |
|                  | Yes               | 99.5             | 2.37 | 1.57-3.56 | 96.9                                                                                                                                                                                           | 1.52 | 1.28-1.81 | 96.0       | 1.38 | 1.18-1.61 |
| Variable         | Characteristics   | Bipolar disorder |      |           | Anxiety                                                                                                                                                                                        |      |           | Addiction  |      |           |
|                  |                   | %                | OR   | 99% CI    | %                                                                                                                                                                                              | OR   | 99%CI     | %          | OR   | 99%CI     |
| Gender           | Women             | 93.6             |      |           | 91.4                                                                                                                                                                                           |      |           | 90.0       |      |           |
|                  | Men               | 87.3             | 0.47 | 0.42-0.53 | 89.4                                                                                                                                                                                           | 0.79 | 0.71-0.89 | 84.4       | 0.60 | 0.54-0.67 |
|                  | Other/Undisclosed | 93.7             | 1.01 | 0.39-2.60 | 95.2                                                                                                                                                                                           | 1.88 | 0.64-5.55 | 90.5       | 1.05 | 0.48-2.31 |
| Age              | >60 years         | 88.9             |      |           | 89.0                                                                                                                                                                                           |      |           | 86.6       |      |           |
|                  | 41-60 years       | 94.6             | 2.17 | 1.90-2.49 | 92.6                                                                                                                                                                                           | 1.54 | 1.37-1.74 | 89.8       | 1.37 | 1.23-1.52 |
|                  | <40 years         | 93.8             | 1.90 | 1.59-2.26 | 92.1                                                                                                                                                                                           | 1.44 | 1.23-1.70 | 90.6       | 1.50 | 1.29-1.74 |
| Education        | Higher education  | 94.0             |      |           | 91.6                                                                                                                                                                                           |      |           | 90.0       |      |           |
|                  | Lower education   | 87.0             | 0.42 | 0.38-0.47 | 89.1                                                                                                                                                                                           | 0.75 | 0.67-0.84 | 85.0       | 0.63 | 0.57-0.69 |
| Health care exp. | No                | 90.0             |      |           | 90.2                                                                                                                                                                                           |      |           | 86.0       |      |           |
|                  | Yes               | 94.7             | 2.00 | 1.76-2.28 | 92.0                                                                                                                                                                                           | 1.25 | 1.11-1.40 | 92.4       | 1.97 | 1.77-2.20 |
| Variable         | Characteristics   | Stroke           |      |           | Parkinson's disease                                                                                                                                                                            |      |           | Migraine   |      |           |
|                  |                   | %                | OR   | 99% CI    | %                                                                                                                                                                                              | OR   | 99%CI     | %          | OR   | 99%CI     |
| Gender           | Women             | 89.9             |      |           | 86.9                                                                                                                                                                                           |      |           |            |      |           |
|                  | Men               | 82.4             | 0.53 | 0.48-0.58 | 84.3                                                                                                                                                                                           | 0.81 | 0.73-0.89 | 83.5       |      |           |
|                  | Other/Undisclosed | 89.7             | 0.98 | 0.46-2.08 | 84.9                                                                                                                                                                                           | 0.85 | 0.45-1.62 | 79.7       | 0.78 | 0.71-0.85 |
| Age              | >60 years         | 87.7             |      |           | 86.1                                                                                                                                                                                           |      |           | 77.6       |      |           |
|                  | 41-60 years       | 89.3             | 1.16 | 1.04-1.29 | 87.5                                                                                                                                                                                           | 1.13 | 1.25-1.02 | 86.0       | 1.78 | 1.62-1.95 |
|                  | <40 years         | 84.5             | 0.76 | 0.67-0.87 | 83.2                                                                                                                                                                                           | 0.80 | 0.71-0.91 | 88.3       | 2.18 | 1.91-2.48 |
| Education        | Higher education  | 88.3             |      |           | 87.9                                                                                                                                                                                           |      |           | 84.3       |      |           |
|                  | Lower education   | 86.7             | 0.87 | 0.79-0.96 | 82.1                                                                                                                                                                                           | 0.63 | 0.57-0.69 | 78.6       | 0.69 | 0.63-0.75 |
| Health care exp. | No                | 84.5             |      |           | 83.1                                                                                                                                                                                           |      |           | 79.5       |      |           |
|                  | Yes               | 93.0             | 2.44 | 2.18-2.73 | 90.9                                                                                                                                                                                           | 2.04 | 1.85-2.26 | 87.2       | 1.76 | 1.61-1.92 |
| Variable         | Characteristics   | Cancer           |      |           | Hypertension                                                                                                                                                                                   |      |           | Diabetes   |      |           |
|                  |                   | %                | OR   | 99% CI    | %                                                                                                                                                                                              | OR   | 99%CI     | %          | OR   | 99%CI     |
| Gender           | Women             | 33.8             |      |           | 33.7                                                                                                                                                                                           |      |           | 16.7       |      |           |
|                  | Men               | 27.9             | 0.76 | 0.70-0.82 | 26.5                                                                                                                                                                                           | 0.71 | 0.66-0.77 | 13.8       | 0.80 | 0.73-0.88 |
|                  | Other/Undisclosed | 37.3             | 1.16 | 0.72-1.88 | 41.3                                                                                                                                                                                           | 1.38 | 0.86-2.20 | 25.4       | 1.70 | 1.00-2.89 |
| Age              | >60 years         | 28.5             |      |           | 34.2                                                                                                                                                                                           |      |           | 15.3       |      |           |
|                  | 41-60 years       | 34.1             | 1.30 | 1.21-1.40 | 31.5                                                                                                                                                                                           | 0.88 | 0.82-0.95 | 17.2       | 1.15 | 1.05-1.27 |
|                  | <40 years         | 38.2             | 1.55 | 1.41-1.70 | 25.4                                                                                                                                                                                           | 0.65 | 0.59-0.72 | 14.7       | 0.96 | 0.84-1.09 |
| Education        | Higher education  | 34.2             |      |           | 33.5                                                                                                                                                                                           |      |           | 17.3       |      |           |
|                  | Lower education   | 27.7             | 0.74 | 0.68-0.79 | 27.9                                                                                                                                                                                           | 0.77 | 0.71-0.83 | 12.8       | 0.70 | 0.64-0.77 |
| Health care exp. | No                | 27.4             |      |           | 24.9                                                                                                                                                                                           |      |           | 10.6       |      |           |
|                  | Yes               | 39.7             | 1.74 | 1.63-1.87 | 42.6                                                                                                                                                                                           | 2.24 | 2.09-2.39 | 24.3       | 2.71 | 2.49-2.96 |
| Variable         | Characteristics   | Arthritis        |      |           | <i>% indicates proportion of participants rating this disorder or disease as 'associated with the brain,' with the remainder of participants rating it as 'not associated with the brain.'</i> |      |           |            |      |           |
|                  |                   | %                | OR   | 99% CI    |                                                                                                                                                                                                |      |           |            |      |           |
| Gender           | Women             | 5.1              |      |           |                                                                                                                                                                                                |      |           |            |      |           |
|                  | Men               | 3.9              | 0.75 | 0.63-0.89 |                                                                                                                                                                                                |      |           |            |      |           |
|                  | Other/Undisclosed | 6.3              | 1.25 | 0.49-3.23 |                                                                                                                                                                                                |      |           |            |      |           |
| Age              | >60 years         | 4.5              |      |           |                                                                                                                                                                                                |      |           |            |      |           |
|                  | 41-60 years       | 5.2              | 1.15 | 0.98-1.35 |                                                                                                                                                                                                |      |           |            |      |           |
|                  | <40 years         | 4.6              | 1.01 | 0.81-1.25 |                                                                                                                                                                                                |      |           |            |      |           |
| Education        | Higher education  | 4.9              |      |           |                                                                                                                                                                                                |      |           |            |      |           |
|                  | Lower education   | 4.6              | 0.94 | 0.80-1.11 |                                                                                                                                                                                                |      |           |            |      |           |
| Health care exp. | No                | 3.4              |      |           |                                                                                                                                                                                                |      |           |            |      |           |
|                  | Yes               | 7.0              | 2.12 | 1.83-2.46 |                                                                                                                                                                                                |      |           |            |      |           |

## DISCUSSION

### Summary of findings

To the best of our knowledge, this study was the first and largest survey to investigate public perceptions of brain health across countries using an online questionnaire available in multiple languages. Our respondents considered certain behaviors such as substance use (i.e., smoking, drugs, and alcohol consumption) and factors such as lifestyle, physical health, genetics, and social environment important for brain health. Other factors included, in decreasing order of importance, diet, the physical environment and having goals that make life meaningful, followed by socio-economic factors such as income, profession, and education. The respondents rated all life periods as important for the brain although taking care of the brain in the womb (before birth) received relatively less attention. This question aimed to describe the life period during which one can take care of the fetal brain during pregnancy. It is possible that some respondents interpreted this life period as taking care of the mother's brain during pregnancy. However, regardless of how it was interpreted, taking care of the mother's and the fetus's brain is important and deserves attention.

Awareness was high of Alzheimer's disease and dementia affecting the brain. Our respondents more frequently associated mental disorders such as schizophrenia and depression with the brain as compared with neurological disorders such as stroke and Parkinson's disease, although it should be noted that both classes were most often ranked as associated. Since we partly relied on our network of stakeholders working in fields of relevance for brain health to recruit survey respondents, it is likely that our sample was more interested in cognitive and psychological aspects of brain health than the general population. Disorders that are not defined as brain diseases but have an impact on the brain, such as hypertension, diabetes, and arthritis, were perceived to be associated with the brain only to a small extent. Overall, women and highly educated respondents more often rated items as important than men and less educated participants. Men and women also differed in which factors they considered important for brain health.

### Relevance to previous research

1  
2 The high ranking of substance use as a factor influencing brain health is consistent with data from  
3  
4 surveys in Australia and the USA<sup>19 35</sup> but not from previous surveys in Ireland<sup>5</sup> or the Netherlands<sup>7</sup>  
5  
6 where other factors like cognitive activity were given more importance. A recent scoping review of  
7  
8 studies examining public perceptions of risk and protective factors related to cognitive health and  
9  
10 impairment reported that genetics was the most identified risk factor for Alzheimer's disease and  
11  
12 dementia<sup>20</sup>. In our survey, genetics was considered highly important for brain health. Likewise, our  
13  
14 respondents' high ranking of sleep corroborates results from a recent U.K.-wide survey in which  
15  
16 respondents perceived sleep as important for maintaining or improving cognitive skills<sup>36</sup>.  
17  
18

19  
20 Physical health was rated as highly important in our study in contrast to what previous surveys found<sup>7</sup>  
21  
22 <sup>18 19</sup>, which reported limited awareness of how high blood pressure, coronary heart disease, obesity  
23  
24 and plasma cholesterol levels influence brain health. Although our respondents rated physical health  
25  
26 as important, paradoxically, they associated hypertension with the brain to a limited extent. In our  
27  
28 questionnaire, we did not provide any example of what physical health entails, so we do not know  
29  
30 exactly how our respondents interpreted the question. Results across studies may also be difficult to  
31  
32 compare due to differences in the measures and instruments used. Our respondents less often  
33  
34 deemed diet to be of very strong importance for brain health relative to other lifestyle factors, in line  
35  
36 with previous studies<sup>5 37</sup>. Although the topic has been little explored, our participants' limited emphasis  
37  
38 on socio-economic factors is in line with results from an Australian survey on cognitive health<sup>19</sup>. With  
39  
40 few exceptions, most of our participants resided in high-income countries or upper-middle income  
41  
42 countries such as Turkey. Views regarding the importance of socio-economic factors for brain health  
43  
44 may differ in low- and middle-income countries.  
45  
46  
47  
48

49  
50 To our knowledge, few studies have investigated what life periods people consider important for  
51  
52 taking care of the brain. A recent global Ipsos survey (2021) looked at perceptions of the importance  
53  
54 of early life for a person's health and happiness in adulthood<sup>38</sup> and found that people did not consider  
55  
56 the early (first five) years as important for later health, compared with other periods of life. Previous  
57  
58 research has shown that focus is often put on old age, as it might be considered as a risk factor for  
59  
60

1  
2 cognitive decline<sup>39</sup>. In contrast, our respondents attributed high importance to childhood although  
3  
4 they tended to rank age ranges closer to their own as more important. Similarly, we have not found  
5  
6 studies specifically investigating which diseases people associate with the brain. Other surveys have  
7  
8 shown public awareness of dementia<sup>15</sup>, as confirmed by our results, despite limited knowledge of  
9  
10 disease mechanisms and risk and protective factors<sup>5</sup>, little concern regarding risk of developing  
11  
12 dementia<sup>16</sup>, and limited public awareness of the prevalence and characteristics of mental illnesses such  
13  
14 as schizophrenia and bipolar disorders<sup>9 10</sup>.  
15  
16  
17  
18  
19  
20

### 21 **Implications for policymakers**

22  
23  
24 Our sample was highly educated, mostly women probably interested in brain health, and therefore  
25  
26 not representative of the general population. Our survey, however, highlights that even in such  
27  
28 population, there are some knowledge gaps to be filled. Detailed information should be provided  
29  
30 about dietary habits and physical activity beneficial for physical health and for the brain. Our findings  
31  
32 indicate that people may underestimate the importance of risk factors such as diabetes and poor  
33  
34 vascular health for brain health, suggesting an avenue for improved public health messaging. Previous  
35  
36 research has shown that unmarried people are at higher risk of dementia as compared with people  
37  
38 living in stable relationships<sup>40</sup>. We observed that awareness of Alzheimer's disease was higher among  
39  
40 our respondents living in stable relationships. This may suggest the need for targeted brain health  
41  
42 information to single people and those living alone. Men and women differed in their perceptions of  
43  
44 factors influencing brain health. Educational campaigns might need to consider these differences and  
45  
46 leverage them for more personalized messages.  
47  
48  
49

50  
51 Our respondents made a clear connection between mental health and brain health, which may be due  
52  
53 to their experience of the increasing societal burden of mental and addictive disorders<sup>41</sup>. The outbreak  
54  
55 of the covid-19 pandemic in 2020, with strong implications for mental health<sup>42</sup>, may also have  
56  
57 influenced responses. However, we cannot verify this as the survey was anonymous and no time logs  
58  
59 were recorded. Our results suggest that governments should give more attention to the reduction of  
60

1  
2 preventable or modifiable mental health risk factors, for instance by identifying individuals in early  
3  
4 stages of disease or creating social environments promoting psychological well-being<sup>43</sup>.  
5  
6  
7  
8  
9

### 10 **Strengths and limitations**

11  
12 We believe that our study has several strengths. First, we consulted representatives from patient and  
13  
14 civil society organizations such as patient organizations and national brain councils when developing  
15  
16 the survey questionnaire. They are knowledgeable about how the public processes health-related  
17  
18 information and helped strengthen the readability and relevance of our questions. The questions were  
19  
20 also piloted in a previous study<sup>26</sup> and at several public meetings. Second, we translated the survey into  
21  
22 14 languages, made it available online, and promoted it in Europe and beyond. This enabled us to  
23  
24 achieve a sample size up to 10 times larger than in previous comparable surveys<sup>19 7 44</sup>. Third, our survey  
25  
26 described brain health as encompassing both cognitive and mental health. This definition was more  
27  
28 comprehensive than in other studies, which often focused solely on one aspect of brain health such as  
29  
30 cognitive decline. This may make our results more relevant when discussing brain health promotion.  
31  
32  
33  
34

35  
36 Our study has limitations. Our sample is not representative of the general population. Our respondents  
37  
38 were predominantly highly educated, mostly women from the oldest segment of population reporting  
39  
40 good cognitive and mental health. This is probably due to our recruitment strategy. Several of the  
41  
42 Lifebrain cohorts<sup>23</sup> as well as the research registries we used to recruit participants included more  
43  
44 female, educated volunteers<sup>34</sup>. This may also be because women appear more concerned about  
45  
46 cognitive decline and the maintenance of cognitive skills<sup>36 45</sup> than men. Our respondents were probably  
47  
48 more interested in, and knowledgeable about, brain health than the general population. Although we  
49  
50 did not collect any ethnic data, we suspect that our sample was probably not ethnically and culturally  
51  
52 diverse. We also do not know whether people in developing countries would manifest different  
53  
54 perceptions to brain health, particularly the influence of socio-economic factors. Another limitation of  
55  
56 our study is that an online survey is more easily accessed by the most resourceful population groups  
57  
58 with digital connection and competence. We were aware of this limitation when conceiving the study  
59  
60



1  
2 but aimed to reach a large international sample and include respondents from the Lifebrain  
3 consortium. Using an online tool was the most appropriate strategy due to our limited resources and  
4 it facilitated anonymous collection of data. Finally, although great care was taken in the translation  
5 and back-translation process<sup>22</sup> and stakeholders in several countries helped adapt the survey to their  
6 local circumstances, there is a risk that our international respondents interpreted our questions slightly  
7 differently due to nuances in translations and the novelty of the concept of brain health<sup>26</sup>.  
8  
9  
10  
11  
12  
13  
14  
15  
16  
17  
18

## 19 **CONCLUSIONS AND FUTURE DIRECTIONS**

20  
21 Our findings reflect a relatively good understanding of some facets of brain health. Awareness was  
22 higher among highly educated, female respondents as compared to male and lowly educated  
23 respondents. Differences in perceptions of brain health were noted among specific segments of the  
24 population, suggesting that targeted policy actions towards these groups might be of relevance.  
25 Exploring how perceptions of brain health relate to intentions to follow brain-friendly lifestyles will  
26 also be of interest, knowing that such intentions may also depend on perceptions of risk<sup>46 47</sup> and the  
27 socio-economic, physical, and technological contexts in which people navigate<sup>48</sup>. Analysis of  
28 subsequent questions in this survey will provide some answers to this question.  
29  
30  
31  
32  
33  
34  
35  
36  
37  
38  
39

40 Future research should investigate views on brain health of diverse ethnic groups in Europe, following  
41 recent calls for more diversity in research<sup>49</sup> as well as explore views on brain health in non-Western  
42 countries due to cultural variations<sup>50</sup>. We did not compare results between countries due to varying  
43 sample size and recruitment strategies. Future research might investigate whether results differ  
44 between the three countries with most responses (United Kingdom, the Netherlands, Norway), and  
45 how any difference may have implications for brain health promotion at national levels. Future studies  
46 should also consider adopting alternative recruitment techniques and data collection platforms and  
47 include more men and respondents more representative of the general population.  
48  
49  
50  
51  
52  
53  
54  
55  
56  
57  
58  
59  
60

## Acknowledgments

We are grateful for the valuable help we received from many people to develop and disseminate the survey. This includes, but is not limited to, the Lifebrain research staff, the stakeholders who participated in Lifebrain workshops and public lectures, representatives from the Norwegian Brain Council, the Belgian Brain Council, the German Brain Council, the Brain Foundation Netherlands (Hersenstichting.nl), the Swedish Brain Foundation, the Women's Brain Project, the National University of Ostroh Academy in Ukraine, Join Dementia Research, Hersenonderzoek, patient organizations and professional societies in Europe and elsewhere. We thank the survey respondents for their contribution.

## Contributors

IBL, AMM, BBF, KPE, CAD, RBC, EZ, WFCB, KSM, AMJ, RAK, PG, DBF, LN, CAP, KBW, SD, LZ, MFI, and MTF were involved in the design and data collection of the study. AMM, KPE, ØS and EZs had full access to the raw data and conducted the statistical analysis. IBL, BBF, CAD, NAGF and RBC made substantial contribution to the analysis of the data. IBL drafted the manuscript. IBL, AMM, BBF, KPE, CAD, RBC, EZ, NAGF, ØS, WFCB, KSM, AMJ, RAK, PG, DBF, LN, CAP, KBW, SD, LZ, MFI, and MTF substantively revised the manuscript, and approved the submitted version. IBL is the guarantor for the article. The corresponding author attests that all listed authors meet authorship criteria and that no others meeting the criteria have been omitted.

## Funding

This research was funded by the EU Horizon 2020 Grant: Healthy minds 0–100 years: Optimising the use of European brain imaging cohorts (Lifebrain), Grant Agreement No. 732592.

## Competing interest

1  
2 Competing interests: All authors have completed the ICMJE uniform disclosure form at  
3  
4 [www.icmje.org/coi\\_disclosure.pdf](http://www.icmje.org/coi_disclosure.pdf) and declare: no support from any organisation for the submitted  
5  
6 work; no financial relationships with any organisations that might have an interest in the submitted  
7  
8 work in the previous three years [or describe if any]; no other relationships or activities that could  
9  
10 appear to have influenced the submitted work.  
11  
12

13 MTF is the Chief Scientific Officer of the Women's Brain Project and has received personal fees from  
14  
15 Eli Lilly on a project not related to the current paper.  
16  
17  
18  
19  
20  
21

### 22 **Patients consent for publication**

23  
24 Not required  
25  
26  
27  
28  
29

### 30 **Ethics approval**

31  
32  
33 The survey was reviewed by the Regional Committees for Medical and Health Research Ethics in  
34  
35 Norway (2017/653 REK SørØst B) and approved for exemption from ethics approval according to the  
36  
37 Norwegian Health Research Act. In addition, the survey was approved by the University of Oxford  
38  
39 Medical Sciences Interdivisional Research Ethics Committee (R67364/RE001) and the Medical Ethics  
40  
41 Review Committee of VU University Medical Center in the Netherlands as required for dissemination  
42  
43 in the country's research networks. Ethics approval was not required for dissemination in the other  
44  
45 Lifebrain partner countries.  
46  
47  
48  
49  
50  
51

### 52 **Data availability statement**

53  
54  
55 Data will be made available via an open science platform before the Lifebrain project ends.  
56  
57  
58  
59  
60

## Transparency declaration

The corresponding author affirms that this manuscript is an honest, accurate, and transparent account of the study being reported; that no important aspects of the study have been omitted; and that any discrepancies from the study as planned (and, if relevant, registered) have been explained.

## Copyright/license for publication

The corresponding author has the right to grant on behalf of all authors and does grant on behalf of all authors, a worldwide license to the Publishers and its licensees in perpetuity, in all forms, formats and media (whether known now or created in the future), to i) publish, reproduce, distribute, display and store the Contribution, ii) translate the Contribution into other languages, create adaptations, reprints, include within collections and create summaries, extracts and/or, abstracts of the Contribution, iii) create any other derivative work(s) based on the Contribution, iv) to exploit all subsidiary rights in the Contribution, v) the inclusion of electronic links from the Contribution to third party material wherever it may be located; and, vi) license any third party to do any or all of the above.

## REFERENCES

1. Raggi A, Leonardi M. Burden of brain disorders in Europe in 2017 and comparison with other non-communicable disease groups. *J Neurol Neurosurg Psychiatry* 2020;91(1):104-05. doi: 10.1136/jnnp-2019-320466 [published Online First: 2019/06/19]
2. National Institute on Aging U. What is brain health? : National Institute on Aging; 2019 [Available from: <https://brainhealth.nia.nih.gov/> accessed 20 May 2019.
3. Mintzer J, Donovan KA, Kindy AZ, et al. Lifestyle Choices and Brain Health. *Frontiers in Medicine* 2019;6(204) doi: 10.3389/fmed.2019.00204
4. Livingston G, Sommerlad A, Orgeta V, et al. Dementia prevention, intervention, and care. *Lancet* 2017 doi: 10.1016/S0140-6736(17)31363-6
5. Glynn RW, Shelley E, Lawlor BA. Public knowledge and understanding of dementia-evidence from a national survey in Ireland. *Age Ageing* 2017;46(5):865-69. doi: 10.1093/ageing/afx082 [published Online First: 2017/05/23]
6. Rosato M, Leavey G, Cooper J, et al. Factors associated with public knowledge of and attitudes to dementia: A cross-sectional study. *PLoS One* 2019;14(2):e0210543. doi: 10.1371/journal.pone.0210543 [published Online First: 2019/03/01]
7. Heger I, Deckers K, van Boxtel M, et al. Dementia awareness and risk perception in middle-aged and older individuals: baseline results of the MijnBreincoach survey on the association

- 1  
2 between lifestyle and brain health. *BMC Public Health* 2019;19(1):678. doi: 10.1186/s12889-  
3 019-7010-z
- 4 8. Alzheimer's Research UK. Dementia Attitudes Monitor. Wave 1 2018. Shaping breakthroughs in  
5 public understanding of dementia and attitudes to research., 2018.
- 6 9. Durand-Zaleski I, Scott J, Rouillon F, et al. A first national survey of knowledge, attitudes and  
7 behaviours towards schizophrenia, bipolar disorders and autism in France. *BMC Psychiatry*  
8 2012;12:128. doi: 10.1186/1471-244X-12-128 [published Online First: 2012/08/30]
- 9 10. Cadge C, Connor C, Greenfield S. University students' understanding and perceptions of  
10 schizophrenia in the UK: a qualitative study. *BMJ Open* 2019;9(4):e025813. doi:  
11 10.1136/bmjopen-2018-025813 [published Online First: 2019/04/06]
- 12 11. Tomat N, Perovnik M, Vidmar G, et al. Lay Public View of Neuroscience and Science-Based Brain  
13 Health Recommendations in Slovenia. *Frontiers in Public Health* 2021;9(841) doi:  
14 10.3389/fpubh.2021.690421
- 15 12. Niechcial MA, Vaportzis E, Gow AJ. People's views on preserving thinking skills in old age.  
16 *Educational Gerontology* 2019;45(5):341-52. doi: 10.1080/03601277.2019.1627054
- 17 13. Bosco A, Jones KA, Di Lorito C, et al. Changing lifestyle for dementia risk reduction: Inductive  
18 content analysis of a national UK survey. *PLoS One* 2020;15(5):e0233039. doi:  
19 10.1371/journal.pone.0233039 [published Online First: 2020/05/16]
- 20 14. Rosenberg A, Coley N, Soulier A, et al. Experiences of dementia and attitude towards prevention:  
21 a qualitative study among older adults participating in a prevention trial. *BMC Geriatr*  
22 2020;20(1):99. doi: 10.1186/s12877-020-1493-4 [published Online First: 2020/03/14]
- 23 15. Anderson LA, Day KL, Beard RL, et al. The public's perceptions about cognitive health and  
24 Alzheimer's disease among the U.S. population: a national review. *Gerontologist* 2009;49  
25 Suppl 1:S3-11. doi: 10.1093/geront/gnp088
- 26 16. Smith BJ, Ali S, Quach H. Public knowledge and beliefs about dementia risk reduction: a national  
27 survey of Australians. *BMC Public Health* 2014;14:661. doi: 10.1186/1471-2458-14-661
- 28 17. Kim S, Sargent-Cox KA, Anstey KJ. A qualitative study of older and middle-aged adults' perception  
29 and attitudes towards dementia and dementia risk reduction. *J Adv Nurs* 2015;71(7):1694-  
30 703. doi: 10.1111/jan.12641 [published Online First: 2015/02/24]
- 31 18. Barak Y, Gray AR, Rapsey C, et al. The Dunedin dementia risk awareness project: pilot study in  
32 older adults. *Int Psychogeriatr* 2020;32(2):241-54. doi: 10.1017/S1041610219000772  
33 [published Online First: 2019/09/14]
- 34 19. Hosking DE, Sargent-Cox KA, Anstey KJ. An Australian survey of cognitive health beliefs,  
35 intentions, and behaviours through the adult life course. *Prev Med Rep* 2015;2:498-504. doi:  
36 10.1016/j.pmedr.2015.06.008
- 37 20. Friedman DB, Becofsky K, Anderson LA, et al. Public perceptions about risk and protective factors  
38 for cognitive health and impairment: a review of the literature. *Int Psychogeriatr*  
39 2015;27(8):1263-75. doi: 10.1017/S1041610214002877
- 40 21. The Lifebrain Consortium. Lifebrain 2018 [Available from: <http://www.lifebrain.uio.no/>.]
- 41 22. Budin-Ljøsne I, Friedman BB, Suri S, et al. The Global Brain Health Survey: Development of a  
42 Multi-Language Survey of Public Views on Brain Health. *Frontiers in Public Health*  
43 2020;8(387) doi: 10.3389/fpubh.2020.00387
- 44 23. Walhovd KB, Fjell AM, Westerhausen R, et al. Healthy minds from 0-100 years: Optimising the use  
45 of European brain imaging cohorts ("Lifebrain"). *Eur Psychiatry* 2017;47:76-87. doi:  
46 10.1016/j.eurpsy.2017.10.005
- 47 24. Lifebrain. What motivates people to look after their brain health? Insights from the Global Brain  
48 Health Survey. Oslo: Lifebrain; 2022. ISBN: 978-82-8406-267-9, 2022.
- 49 25. Lifebrain. How to promote citizens' brain health? Insights from the Global Brain Health. Survey on  
50 citizen's perceptions of brain health interventions". 2021, Lifebrain. ISBN: 978-82-8406-223-5  
51 2021.
- 52 26. Friedman BB, Suri S, Sole-Padulles C, et al. Are People Ready for Personalized Brain Health?  
53 Perspectives of Research Participants in the Lifebrain Consortium. *Gerontologist* 2019 doi:  
54 10.1093/geront/gnz155
- 55  
56  
57  
58  
59  
60

- 1  
2 27. Mauguiere F, Trejo JL, Andjus P, et al. Ten priorities for national brain and mental health plans.  
3 *Croat Med J* 2019;60(2):152-55.
- 4 28. Baare WFCM, KS; Arnesen, M; Carver, RB; Drevon, CA; Budin-Ljøsne, I Brain researchers want to  
5 know how you take care of your brain 2020 [Available from:  
6 [https://sciencenordic.com/brain-denmark-researchers-zone/brain-researchers-want-to-](https://sciencenordic.com/brain-denmark-researchers-zone/brain-researchers-want-to-know-how-you-take-care-of-your-brain/1621966)  
7 [know-how-you-take-care-of-your-brain/1621966](https://sciencenordic.com/brain-denmark-researchers-zone/brain-researchers-want-to-know-how-you-take-care-of-your-brain/1621966).  
8
- 9 29. Baare WFCM KA, M; Carver, RB; Drevon, CA; Budin-Ljøsne, I. Hjælp forskerne: Hvordan passer du  
10 på din hjerne? : Forskerzonen; 2020 [Available from: [https://videnskab.dk/krop-](https://videnskab.dk/krop-sundhed/hjaelp-forskerne-hvordan-passer-du-paa-din-hjerne)  
11 [sundhed/hjaelp-forskerne-hvordan-passer-du-paa-din-hjerne](https://videnskab.dk/krop-sundhed/hjaelp-forskerne-hvordan-passer-du-paa-din-hjerne).  
12
- 13 30. R: A Language and Environment for Statistical Computing [program]: R Foundation for Statistical  
14 Computing, 2021.
- 15 31. Altman DG, Royston P. The cost of dichotomising continuous variables. *BMJ*  
16 2006;332(7549):1080. doi: 10.1136/bmj.332.7549.1080
- 17 32. Elm Ev, Altman DG, Egger M, et al. Strengthening the reporting of observational studies in  
18 epidemiology (STROBE) statement: guidelines for reporting observational studies. *BMJ*  
19 2007;335(7624):806-08. doi: 10.1136/bmj.39335.541782.AD
- 20 33. Join Dementia Research [Available from: <https://www.joindementiaresearch.nihr.ac.uk/>.  
21
- 22 34. Hersenonderzoek.nl. [Available from: <https://hersenonderzoek.nl/>.  
23
- 24 35. American Society on Aging. ASA-MetLife Foundation Attitudes and Awareness of Brain Health  
25 Poll, 2006.
- 26 36. Vaportzis E, Gow AJ. People's Beliefs and Expectations About How Cognitive Skills Change with  
27 Age: Evidence From a U.K.-Wide Aging Survey. *Am J Geriatr Psychiatry* 2018;26(7):797-805.  
28 doi: 10.1016/j.jagp.2018.03.016 [published Online First: 2018/05/08]
- 29 37. Wilcox S, Sharkey JR, Mathews AE, et al. Perceptions and Beliefs About the Role of Physical  
30 Activity and Nutrition on Brain Health in Older Adults. *Gerontologist* 2009;49 doi:  
31 10.1093/geront/gnp078
- 32 38. IPSOS. Attitudes towards the early years, 2021.
- 33 39. Maust DT, Solway E, Langa KM, et al. Perception of Dementia Risk and Preventive Actions Among  
34 US Adults Aged 50 to 64 Years. *JAMA Neurol* 2020;77(2):259-62. doi:  
35 10.1001/jamaneurol.2019.3946 [published Online First: 2019/11/16]
- 36 40. Sommerlad A, Ruegger J, Singh-Manoux A, et al. Marriage and risk of dementia: systematic  
37 review and meta-analysis of observational studies. *J Neurol Neurosurg Psychiatry*  
38 2018;89(3):231-38. doi: 10.1136/jnnp-2017-316274 [published Online First: 2017/12/01]
- 39 41. Rehm J, Shield KD. Global Burden of Disease and the Impact of Mental and Addictive Disorders.  
40 *Curr Psychiatry Rep* 2019;21(2):10. doi: 10.1007/s11920-019-0997-0 [published Online First:  
41 2019/02/08]
- 42 42. Barzilay R, Moore TM, Greenberg DM, et al. Resilience, COVID-19-related stress, anxiety and  
43 depression during the pandemic in a large population enriched for healthcare providers.  
44 *Translational Psychiatry* 2020;10(1):291. doi: 10.1038/s41398-020-00982-4
- 45 43. Arango C, Diaz-Caneja CM, McGorry PD, et al. Preventive strategies for mental health. *Lancet*  
46 *Psychiatry* 2018;5(7):591-604. doi: 10.1016/S2215-0366(18)30057-9 [published Online First:  
47 2018/05/19]
- 48 44. Mehegan LR, C; Skufca L. 2017 Brain Health and Nutrition Survey. AARP Research 2018 [Available  
49 from: <https://doi.org/10.26419/res.00187.001>.  
50
- 51 45. Wu B, Goins RT, Laditka JN, et al. Gender differences in views about cognitive health and healthy  
52 lifestyle behaviors among rural older adults. *Gerontologist* 2009;49 Suppl 1:S72-8. doi:  
53 10.1093/geront/gnp077
- 54 46. Gaube S, Lerner E, Fischer P. The Concept of Risk Perception in Health-Related Behavior Theory  
55 and Behavior Change. In: Raue M, Streicher B, Lerner E, eds. Perceived Safety: A  
56 Multidisciplinary Perspective. Cham: Springer International Publishing 2019:101-18.
- 57 47. Ferrer R, Klein WM. Risk perceptions and health behavior. *Curr Opin Psychol* 2015;5:85-89. doi:  
58 10.1016/j.copsyc.2015.03.012 [published Online First: 2015/08/11]  
59  
60

- 1  
2 48. Wahl HW, Hoppmann CA, Ram N, et al. Healthy Aging-Relevant Goals: The Role of Person-Context  
3 Co-construction. *J Gerontol B Psychol Sci Soc Sci* 2021;76(Supplement\_2):S181-S90. doi:  
4 10.1093/geronb/gbab089 [published Online First: 2021/09/14]  
5 49. Farkas L. Data collection in the field of ethnicity. European Commission. Luxembourg:  
6 Publications Office of the European Union, 2017.  
7 50. Wang Y, Pan Y, Li H. What is brain health and why is it important? *Bmj* 2020;371:m3683. doi:  
8 10.1136/bmj.m3683 [published Online First: 2020/10/11]  
9  
10  
11  
12  
13  
14  
15  
16  
17  
18  
19  
20  
21  
22  
23  
24  
25  
26  
27  
28  
29  
30  
31  
32  
33  
34  
35  
36  
37  
38  
39  
40  
41  
42  
43  
44  
45  
46  
47  
48  
49  
50  
51  
52  
53  
54  
55  
56  
57  
58  
59  
60

For peer review only

1  
2 **Figures (provided in separate files)**  
3

4  
5 **Figure 1. Factors believed to have a strong influence on brain health**  
6

7 *% indicates proportion of participants rating this factor as having a 'strong' or 'very strong' influence*  
8 *on brain health, with the remainder of participants rating it as 'moderate,' 'weak' or 'no influence.'*  
9

10  
11  
12  
13  
14  
15  
16 **Figure 2. Life periods considered important to take care of one's brain**  
17

18 *% indicates proportion of participants rating this life period as 'important' or 'very important,' with*  
19 *the remainder of participants rating it as 'not important' or 'moderately important.'*  
20  
21  
22

23  
24  
25  
26  
27 **Figure 3. Diseases and disorders believed to be associated with the brain**  
28

29 *% indicates proportion of participants rating this disorder or disease as 'associated with the brain,'*  
30 *with the remainder of participants rating it as 'not associated with the brain.'*  
31  
32  
33

34  
35  
36  
37  
38  
39  
40 **Supplementary material (provided in separate files)**  
41

42  
43 Supplementary material 1. Comparison of binary vs continuous outcome models  
44

45  
46 Supplementary material 2. Lifebrain Global Brain Health Survey. Detailed descriptive statistics  
47

48  
49 Supplementary material 3. All model tables  
50

51  
52 Supplementary material 4. Demographic characteristics across countries  
53

54  
55 Supplementary material 5. Lifebrain Global Brain Health Survey. Odd ratios and 99% confidence  
56  
57 intervals across all demographic characteristics  
58  
59  
60



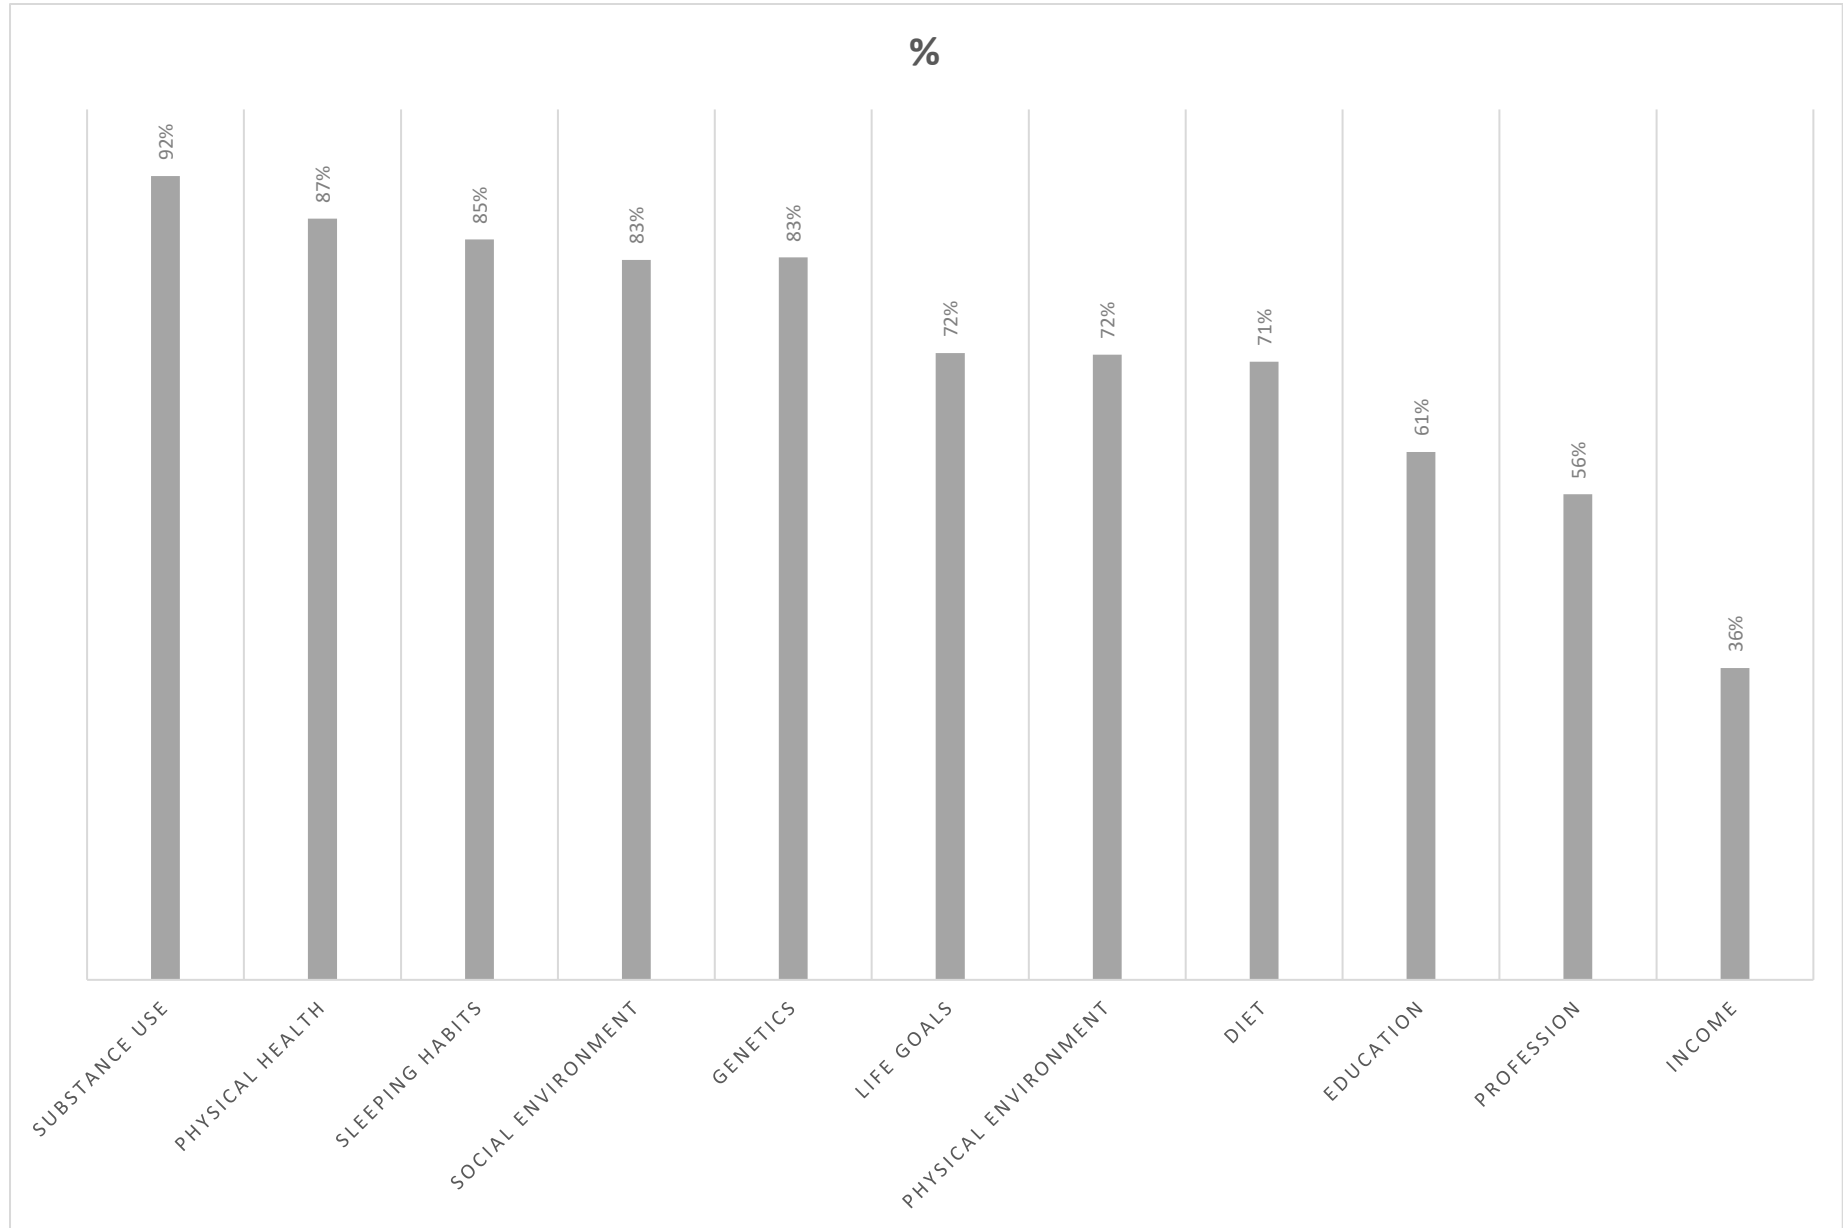

1  
2  
3  
4  
5  
6  
7  
8  
9  
10  
11  
12  
13  
14  
15  
16  
17  
18  
19  
20  
21  
22  
23  
24  
25  
26  
27  
28  
29  
30  
31  
32  
33  
34  
35  
36  
37  
38  
39  
40  
41  
42  
43  
44  
45  
46

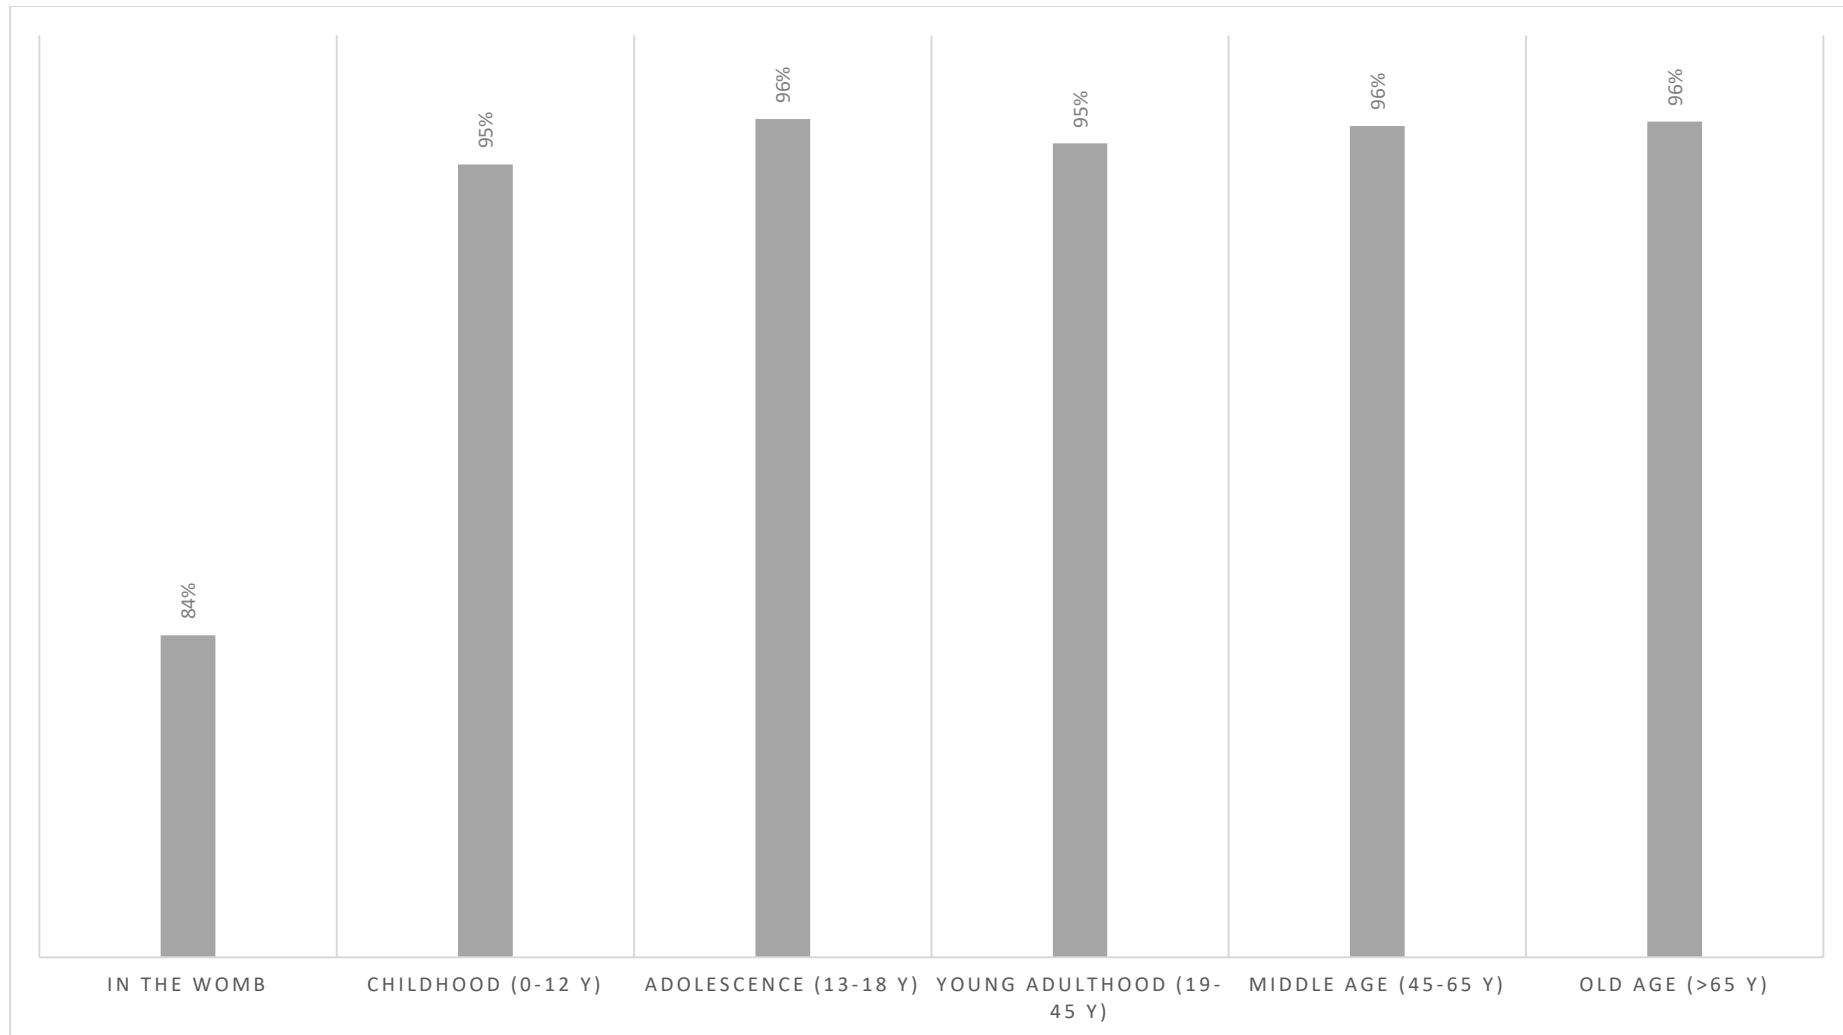



# Lifebrain Global Brain Health Survey

## Supplementary tables

### Contents

|          |                                                |          |
|----------|------------------------------------------------|----------|
| <b>1</b> | <b>Question 1</b>                              | <b>3</b> |
| 1.1      | Continuous models                              | 3        |
| 1.1.1    | Question 1: continuous - Substance use         | 4        |
| 1.1.2    | Question 1: continuous - Genetics              | 5        |
| 1.1.3    | Question 1: continuous - Physical health       | 6        |
| 1.1.4    | Question 1: continuous - Sleeping habits       | 7        |
| 1.1.5    | Question 1: continuous - Social environment    | 8        |
| 1.1.6    | Question 1: continuous - Life goals            | 9        |
| 1.1.7    | Question 1: continuous - Physical environment  | 10       |
| 1.1.8    | Question 1: continuous - Diet                  | 11       |
| 1.1.9    | Question 1: continuous - Education             | 12       |
| 1.1.10   | Question 1: continuous - Profession            | 13       |
| 1.1.11   | Question 1: continuous - Income                | 14       |
| 1.2      | Binary models                                  | 14       |
| 1.2.1    | Question 1: binary - Substance use             | 15       |
| 1.2.2    | Question 1: binary - Genetics                  | 16       |
| 1.2.3    | Question 1: binary - Physical health           | 17       |
| 1.2.4    | Question 1: binary - Sleeping habits           | 18       |
| 1.2.5    | Question 1: binary - Social environment        | 19       |
| 1.2.6    | Question 1: binary - Life goals                | 20       |
| 1.2.7    | Question 1: binary - Physical environment      | 21       |
| 1.2.8    | Question 1: binary - Diet                      | 22       |
| 1.2.9    | Question 1: binary - Education                 | 23       |
| 1.2.10   | Question 1: binary - Profession                | 24       |
| 1.2.11   | Question 1: binary - Income                    | 25       |
| 1.3      | Ordinal models                                 | 25       |
| 1.3.1    | Question 1: ordinal - Substance use            | 26       |
| 1.3.2    | Question 1: ordinal - Genetics                 | 28       |
| 1.3.3    | Question 1: ordinal - Physical health          | 30       |
| 1.3.4    | Question 1: ordinal - Sleeping habits          | 32       |
| 1.3.5    | Question 1: ordinal - Social environment       | 34       |
| 1.3.6    | Question 1: ordinal - Life goals               | 36       |
| 1.3.7    | Question 1: ordinal - Physical environment     | 38       |
| 1.3.8    | Question 1: ordinal - Diet                     | 40       |
| 1.3.9    | Question 1: ordinal - Education                | 42       |
| 1.3.10   | Question 1: ordinal - Profession               | 44       |
| 1.3.11   | Question 1: ordinal - Income                   | 46       |
| 1.4      | Comparison binary and continuous model results | 47       |
| 1.4.1    | Question 1: bin_vs_cont - Substance use        | 47       |
| 1.4.2    | Question 1: bin_vs_cont - Sleeping habits      | 47       |
| 1.4.3    | Question 1: bin_vs_cont - Life goals           | 47       |
| 1.4.4    | Question 1: bin_vs_cont - Diet                 | 48       |

1  
2  
3  
4  
5  
6  
7  
8  
9  
10  
11  
12  
13  
14  
15  
16  
17  
18  
19  
20  
21  
22  
23  
24  
25  
26  
27  
28  
29  
30  
31  
32  
33  
34  
35  
36  
37  
38  
39  
40  
41  
42  
43  
44  
45  
46  
47  
48  
49  
50  
51  
52  
53  
54  
55  
56  
57  
58  
59  
60

|          |                                                          |           |
|----------|----------------------------------------------------------|-----------|
| 1.4.5    | Question 1: bin_vs_cont - Education . . . . .            | 48        |
| 1.4.6    | Question 1: bin_vs_cont - Income . . . . .               | 48        |
| <b>2</b> | <b>Question 2</b>                                        | <b>49</b> |
| 2.1      | Continuous models . . . . .                              | 49        |
| 2.1.1    | Question 2: continuous - In the womb . . . . .           | 50        |
| 2.1.2    | Question 2: continuous - Childhood . . . . .             | 51        |
| 2.1.3    | Question 2: continuous - Adolescence . . . . .           | 52        |
| 2.1.4    | Question 2: continuous - Young adulthood . . . . .       | 53        |
| 2.1.5    | Question 2: continuous - Middle age . . . . .            | 54        |
| 2.1.6    | Question 2: continuous - Old age . . . . .               | 55        |
| 2.2      | Binary models . . . . .                                  | 55        |
| 2.2.1    | Question 2: binary - In the womb . . . . .               | 56        |
| 2.2.2    | Question 2: binary - Childhood . . . . .                 | 57        |
| 2.2.3    | Question 2: binary - Adolescence . . . . .               | 58        |
| 2.2.4    | Question 2: binary - Young adulthood . . . . .           | 59        |
| 2.2.5    | Question 2: binary - Middle age . . . . .                | 60        |
| 2.2.6    | Question 2: binary - Old age . . . . .                   | 61        |
| 2.3      | Ordinal models . . . . .                                 | 61        |
| 2.3.1    | Question 2: ordinal - In the womb . . . . .              | 62        |
| 2.3.2    | Question 2: ordinal - Childhood . . . . .                | 64        |
| 2.3.3    | Question 2: ordinal - Adolescence . . . . .              | 66        |
| 2.3.4    | Question 2: ordinal - Young adulthood . . . . .          | 68        |
| 2.3.5    | Question 2: ordinal - Middle age . . . . .               | 70        |
| 2.3.6    | Question 2: ordinal - Old age . . . . .                  | 72        |
| 2.4      | Comparison binary and continuous model results . . . . . | 73        |
| 2.4.1    | Question 2: bin_vs_cont - In the womb . . . . .          | 73        |
| 2.4.2    | Question 2: bin_vs_cont - Childhood . . . . .            | 73        |
| 2.4.3    | Question 2: bin_vs_cont - Adolescence . . . . .          | 73        |
| 2.4.4    | Question 2: bin_vs_cont - Young adulthood . . . . .      | 73        |
| <b>3</b> | <b>Question 3</b>                                        | <b>74</b> |
| 3.1      | Binary models . . . . .                                  | 74        |
| 3.1.1    | Question 3: binary - Alzheimer's . . . . .               | 75        |
| 3.1.2    | Question 3: binary - Schizophrenia . . . . .             | 76        |
| 3.1.3    | Question 3: binary - Depression . . . . .                | 77        |
| 3.1.4    | Question 3: binary - Bipolar . . . . .                   | 78        |
| 3.1.5    | Question 3: binary - Anxiety . . . . .                   | 79        |
| 3.1.6    | Question 3: binary - Addiction . . . . .                 | 80        |
| 3.1.7    | Question 3: binary - Stroke . . . . .                    | 81        |
| 3.1.8    | Question 3: binary - Parkinson's . . . . .               | 82        |
| 3.1.9    | Question 3: binary - Migraine . . . . .                  | 83        |
| 3.1.10   | Question 3: binary - Cancer . . . . .                    | 84        |
| 3.1.11   | Question 3: binary - Hypertension . . . . .              | 85        |
| 3.1.12   | Question 3: binary - Diabetes . . . . .                  | 86        |
| 3.1.13   | Question 3: binary - Arthritis . . . . .                 | 87        |

# 1 Question 1

## 1.1 Continuous models

For peer review only

## 1.1.1 Question 1: continuous - Substance use

| fct                          | term              | estimate | std.error | statistic | p.value |
|------------------------------|-------------------|----------|-----------|-----------|---------|
|                              | (Intercept)       | 4.43     | 0.01      | 688.58    | 0.00    |
| age                          | 41-60             | 0.14     | 0.01      | 14.92     | 0.00    |
|                              | <= 40             | 0.12     | 0.01      | 9.92      | 0.00    |
| education                    | (Intercept)       | 4.52     | 0.01      | 854.00    | 0.00    |
|                              | Lower             | -0.06    | 0.01      | -6.44     | 0.00    |
| gender                       | (Intercept)       | 4.54     | 0.01      | 873.16    | 0.00    |
|                              | Man               | -0.11    | 0.01      | -11.15    | 0.00    |
|                              | Other/Undisclosed | -0.18    | 0.06      | -2.83     | 0.00    |
| healthcare_experience        | (Intercept)       | 4.47     | 0.01      | 798.95    | 0.00    |
|                              | Yes               | 0.10     | 0.01      | 10.71     | 0.00    |
| cognitive_health             | (Intercept)       | 4.52     | 0.00      | 998.47    | 0.00    |
|                              | Below average     | -0.18    | 0.02      | -9.81     | 0.00    |
| mental_health                | (Intercept)       | 4.51     | 0.00      | 956.62    | 0.00    |
|                              | Below average     | -0.03    | 0.01      | -2.19     | 0.03    |
| illness_experience           | (Intercept)       | 4.53     | 0.01      | 796.11    | 0.00    |
|                              | Yes               | -0.05    | 0.01      | -5.55     | 0.00    |
| brain_disease_caregiver      | (Intercept)       | 4.50     | 0.01      | 749.35    | 0.00    |
|                              | Yes               | 0.01     | 0.01      | 1.46      | 0.14    |
| brain_research_participation | (Intercept)       | 4.51     | 0.01      | 774.55    | 0.00    |
|                              | Yes               | -0.02    | 0.01      | -2.00     | 0.05    |
| relationship                 | (Intercept)       | 4.50     | 0.01      | 680.52    | 0.00    |
|                              | Stable            | 0.01     | 0.01      | 0.65      | 0.52    |

## 1.1.2 Question 1: continuous - Genetics

| fct                          | term              | estimate | std.error | statistic | p.value |
|------------------------------|-------------------|----------|-----------|-----------|---------|
|                              | (Intercept)       | 4.18     | 0.01      | 601.12    | 0.00    |
| age                          | 41-60             | 0.03     | 0.01      | 2.59      | 0.01    |
|                              | <= 40             | -0.12    | 0.01      | -8.53     | 0.00    |
| education                    | (Intercept)       | 4.18     | 0.01      | 731.49    | 0.00    |
|                              | Lower             | -0.03    | 0.01      | -2.59     | 0.01    |
| gender                       | (Intercept)       | 4.20     | 0.01      | 749.84    | 0.00    |
|                              | Man               | -0.10    | 0.01      | -9.30     | 0.00    |
|                              | Other/Undisclosed | -0.32    | 0.07      | -4.60     | 0.00    |
| healthcare_experience        | (Intercept)       | 4.16     | 0.01      | 688.35    | 0.00    |
|                              | Yes               | 0.04     | 0.01      | 3.85      | 0.00    |
| cognitive_health             | (Intercept)       | 4.18     | 0.00      | 854.95    | 0.00    |
|                              | Below average     | -0.05    | 0.02      | -2.72     | 0.01    |
| mental_health                | (Intercept)       | 4.17     | 0.01      | 820.60    | 0.00    |
|                              | Below average     | 0.02     | 0.01      | 1.09      | 0.27    |
| illness_experience           | (Intercept)       | 4.17     | 0.01      | 679.16    | 0.00    |
|                              | Yes               | 0.02     | 0.01      | 2.07      | 0.04    |
| brain_disease_caregiver      | (Intercept)       | 4.11     | 0.01      | 636.56    | 0.00    |
|                              | Yes               | 0.14     | 0.01      | 15.23     | 0.00    |
| brain_research_participation | (Intercept)       | 4.14     | 0.01      | 659.34    | 0.00    |
|                              | Yes               | 0.08     | 0.01      | 8.22      | 0.00    |
| relationship                 | (Intercept)       | 4.14     | 0.01      | 580.72    | 0.00    |
|                              | Stable            | 0.06     | 0.01      | 6.27      | 0.00    |



## 1.1.3 Question 1: continuous - Physical health

| fct                          | term              | estimate | std.error | statistic | p.value |
|------------------------------|-------------------|----------|-----------|-----------|---------|
|                              | (Intercept)       | 4.18     | 0.01      | 666.63    | 0.00    |
| age                          | 41-60             | 0.07     | 0.01      | 7.65      | 0.00    |
|                              | <= 40             | 0.09     | 0.01      | 7.70      | 0.00    |
| education                    | (Intercept)       | 4.26     | 0.01      | 829.57    | 0.00    |
|                              | Lower             | -0.12    | 0.01      | -12.71    | 0.00    |
| gender                       | (Intercept)       | 4.24     | 0.01      | 839.39    | 0.00    |
|                              | Man               | -0.07    | 0.01      | -7.47     | 0.00    |
|                              | Other/Undisclosed | -0.01    | 0.06      | -0.21     | 0.83    |
| healthcare_experience        | (Intercept)       | 4.17     | 0.01      | 769.63    | 0.00    |
|                              | Yes               | 0.12     | 0.01      | 14.06     | 0.00    |
| cognitive_health             | (Intercept)       | 4.23     | 0.00      | 962.91    | 0.00    |
|                              | Below average     | -0.16    | 0.02      | -8.83     | 0.00    |
| mental_health                | (Intercept)       | 4.23     | 0.00      | 924.48    | 0.00    |
|                              | Below average     | -0.07    | 0.01      | -5.46     | 0.00    |
| illness_experience           | (Intercept)       | 4.24     | 0.01      | 768.61    | 0.00    |
|                              | Yes               | -0.05    | 0.01      | -6.01     | 0.00    |
| brain_disease_caregiver      | (Intercept)       | 4.20     | 0.01      | 720.63    | 0.00    |
|                              | Yes               | 0.04     | 0.01      | 4.98      | 0.00    |
| brain_research_participation | (Intercept)       | 4.21     | 0.01      | 744.16    | 0.00    |
|                              | Yes               | 0.02     | 0.01      | 2.45      | 0.01    |
| relationship                 | (Intercept)       | 4.22     | 0.01      | 656.77    | 0.00    |
|                              | Stable            | 0.01     | 0.01      | 0.66      | 0.51    |

## 1.1.4 Question 1: continuous - Sleeping habits

| fct                          | term              | estimate | std.error | statistic | p.value |
|------------------------------|-------------------|----------|-----------|-----------|---------|
|                              | (Intercept)       | 4.02     | 0.01      | 633.20    | 0.00    |
| age                          | 41-60             | 0.28     | 0.01      | 29.04     | 0.00    |
|                              | <= 40             | 0.41     | 0.01      | 32.90     | 0.00    |
| education                    | (Intercept)       | 4.21     | 0.01      | 789.13    | 0.00    |
|                              | Lower             | -0.07    | 0.01      | -7.00     | 0.00    |
| gender                       | (Intercept)       | 4.23     | 0.01      | 808.10    | 0.00    |
|                              | Man               | -0.13    | 0.01      | -13.02    | 0.00    |
|                              | Other/Undisclosed | 0.04     | 0.07      | 0.65      | 0.51    |
| healthcare_experience        | (Intercept)       | 4.15     | 0.01      | 736.57    | 0.00    |
|                              | Yes               | 0.11     | 0.01      | 11.72     | 0.00    |
| cognitive_health             | (Intercept)       | 4.19     | 0.00      | 917.63    | 0.00    |
|                              | Below average     | 0.02     | 0.02      | 1.28      | 0.20    |
| mental_health                | (Intercept)       | 4.17     | 0.00      | 880.30    | 0.00    |
|                              | Below average     | 0.12     | 0.01      | 9.03      | 0.00    |
| illness_experience           | (Intercept)       | 4.17     | 0.01      | 728.84    | 0.00    |
|                              | Yes               | 0.04     | 0.01      | 3.95      | 0.00    |
| brain_disease_caregiver      | (Intercept)       | 4.20     | 0.01      | 695.18    | 0.00    |
|                              | Yes               | -0.03    | 0.01      | -3.77     | 0.00    |
| brain_research_participation | (Intercept)       | 4.24     | 0.01      | 724.78    | 0.00    |
|                              | Yes               | -0.12    | 0.01      | -13.42    | 0.00    |
| relationship                 | (Intercept)       | 4.24     | 0.01      | 638.23    | 0.00    |
|                              | Stable            | -0.10    | 0.01      | -10.98    | 0.00    |

## 1.1.5 Question 1: continuous - Social environment

| fct                          | term              | estimate | std.error | statistic | p.value |
|------------------------------|-------------------|----------|-----------|-----------|---------|
|                              | (Intercept)       | 4.06     | 0.01      | 602.76    | 0.00    |
| age                          | 41-60             | 0.13     | 0.01      | 12.66     | 0.00    |
|                              | <= 40             | 0.26     | 0.01      | 20.07     | 0.00    |
| education                    | (Intercept)       | 4.17     | 0.01      | 749.41    | 0.00    |
|                              | Lower             | -0.06    | 0.01      | -6.20     | 0.00    |
| gender                       | (Intercept)       | 4.18     | 0.01      | 766.26    | 0.00    |
|                              | Man               | -0.11    | 0.01      | -10.85    | 0.00    |
|                              | Other/Undisclosed | 0.17     | 0.07      | 2.52      | 0.01    |
| healthcare_experience        | (Intercept)       | 4.10     | 0.01      | 698.87    | 0.00    |
|                              | Yes               | 0.14     | 0.01      | 14.45     | 0.00    |
| cognitive_health             | (Intercept)       | 4.16     | 0.00      | 874.55    | 0.00    |
|                              | Below average     | -0.13    | 0.02      | -6.66     | 0.00    |
| mental_health                | (Intercept)       | 4.14     | 0.00      | 837.48    | 0.00    |
|                              | Below average     | 0.04     | 0.01      | 2.84      | 0.00    |
| illness_experience           | (Intercept)       | 4.16     | 0.01      | 696.08    | 0.00    |
|                              | Yes               | -0.02    | 0.01      | -1.82     | 0.07    |
| brain_disease_caregiver      | (Intercept)       | 4.14     | 0.01      | 657.26    | 0.00    |
|                              | Yes               | 0.01     | 0.01      | 1.16      | 0.25    |
| brain_research_participation | (Intercept)       | 4.17     | 0.01      | 680.99    | 0.00    |
|                              | Yes               | -0.04    | 0.01      | -4.30     | 0.00    |
| relationship                 | (Intercept)       | 4.17     | 0.01      | 601.43    | 0.00    |
|                              | Stable            | -0.05    | 0.01      | -4.97     | 0.00    |

## 1.1.6 Question 1: continuous - Life goals

| fct                          | term              | estimate | std.error | statistic | p.value |
|------------------------------|-------------------|----------|-----------|-----------|---------|
|                              | (Intercept)       | 3.94     | 0.01      | 517.96    | 0.00    |
| age                          | 41-60             | 0.01     | 0.01      | 0.49      | 0.62    |
|                              | <= 40             | -0.09    | 0.01      | -6.00     | 0.00    |
| education                    | (Intercept)       | 3.94     | 0.01      | 630.76    | 0.00    |
|                              | Lower             | -0.04    | 0.01      | -3.25     | 0.00    |
| gender                       | (Intercept)       | 3.95     | 0.01      | 643.86    | 0.00    |
|                              | Man               | -0.07    | 0.01      | -6.14     | 0.00    |
|                              | Other/Undisclosed | -0.01    | 0.08      | -0.17     | 0.87    |
| healthcare_experience        | (Intercept)       | 3.89     | 0.01      | 589.36    | 0.00    |
|                              | Yes               | 0.11     | 0.01      | 10.78     | 0.00    |
| cognitive_health             | (Intercept)       | 3.93     | 0.01      | 736.61    | 0.00    |
|                              | Below average     | -0.06    | 0.02      | -2.79     | 0.01    |
| mental_health                | (Intercept)       | 3.94     | 0.01      | 709.13    | 0.00    |
|                              | Below average     | -0.07    | 0.02      | -4.39     | 0.00    |
| illness_experience           | (Intercept)       | 3.93     | 0.01      | 585.48    | 0.00    |
|                              | Yes               | 0.01     | 0.01      | 0.93      | 0.35    |
| brain_disease_caregiver      | (Intercept)       | 3.94     | 0.01      | 556.22    | 0.00    |
|                              | Yes               | -0.02    | 0.01      | -1.62     | 0.10    |
| brain_research_participation | (Intercept)       | 3.96     | 0.01      | 576.30    | 0.00    |
|                              | Yes               | -0.06    | 0.01      | -6.14     | 0.00    |
| relationship                 | (Intercept)       | 3.94     | 0.01      | 504.61    | 0.00    |
|                              | Stable            | -0.01    | 0.01      | -0.93     | 0.35    |

## 1.1.7 Question 1: continuous - Physical environment

| fct                          | term              | estimate | std.error | statistic | p.value |
|------------------------------|-------------------|----------|-----------|-----------|---------|
|                              | (Intercept)       | 3.88     | 0.01      | 532.98    | 0.00    |
| age                          | 41-60             | 0.09     | 0.01      | 8.67      | 0.00    |
|                              | <= 40             | 0.06     | 0.01      | 4.14      | 0.00    |
| education                    | (Intercept)       | 3.92     | 0.01      | 656.04    | 0.00    |
|                              | Lower             | 0.02     | 0.01      | 1.57      | 0.12    |
| gender                       | (Intercept)       | 3.95     | 0.01      | 672.96    | 0.00    |
|                              | Man               | -0.08    | 0.01      | -6.99     | 0.00    |
|                              | Other/Undisclosed | 0.10     | 0.07      | 1.43      | 0.15    |
| healthcare_experience        | (Intercept)       | 3.90     | 0.01      | 617.01    | 0.00    |
|                              | Yes               | 0.08     | 0.01      | 8.19      | 0.00    |
| cognitive_health             | (Intercept)       | 3.94     | 0.01      | 770.14    | 0.00    |
|                              | Below average     | -0.10    | 0.02      | -4.90     | 0.00    |
| mental_health                | (Intercept)       | 3.93     | 0.01      | 739.62    | 0.00    |
|                              | Below average     | -0.03    | 0.01      | -2.28     | 0.02    |
| illness_experience           | (Intercept)       | 3.91     | 0.01      | 609.36    | 0.00    |
|                              | Yes               | 0.05     | 0.01      | 5.38      | 0.00    |
| brain_disease_caregiver      | (Intercept)       | 3.92     | 0.01      | 578.50    | 0.00    |
|                              | Yes               | 0.02     | 0.01      | 1.72      | 0.09    |
| brain_research_participation | (Intercept)       | 3.93     | 0.01      | 596.77    | 0.00    |
|                              | Yes               | 0.01     | 0.01      | 0.81      | 0.42    |
| relationship                 | (Intercept)       | 3.95     | 0.01      | 529.19    | 0.00    |
|                              | Stable            | -0.04    | 0.01      | -3.64     | 0.00    |

## 1.1.8 Question 1: continuous - Diet

| fct                          | term              | estimate | std.error | statistic | p.value |
|------------------------------|-------------------|----------|-----------|-----------|---------|
|                              | (Intercept)       | 3.79     | 0.01      | 519.59    | 0.00    |
| age                          | 41-60             | 0.19     | 0.01      | 17.83     | 0.00    |
|                              | <= 40             | 0.24     | 0.01      | 16.58     | 0.00    |
| education                    | (Intercept)       | 3.93     | 0.01      | 655.35    | 0.00    |
|                              | Lower             | -0.12    | 0.01      | -11.01    | 0.00    |
| gender                       | (Intercept)       | 3.94     | 0.01      | 667.95    | 0.00    |
|                              | Man               | -0.14    | 0.01      | -12.65    | 0.00    |
|                              | Other/Undisclosed | 0.05     | 0.07      | 0.65      | 0.51    |
| healthcare_experience        | (Intercept)       | 3.84     | 0.01      | 606.08    | 0.00    |
|                              | Yes               | 0.14     | 0.01      | 14.09     | 0.00    |
| cognitive_health             | (Intercept)       | 3.91     | 0.01      | 761.01    | 0.00    |
|                              | Below average     | -0.18    | 0.02      | -8.69     | 0.00    |
| mental_health                | (Intercept)       | 3.91     | 0.01      | 730.87    | 0.00    |
|                              | Below average     | -0.09    | 0.01      | -5.98     | 0.00    |
| illness_experience           | (Intercept)       | 3.92     | 0.01      | 606.91    | 0.00    |
|                              | Yes               | -0.05    | 0.01      | -4.56     | 0.00    |
| brain_disease_caregiver      | (Intercept)       | 3.86     | 0.01      | 567.08    | 0.00    |
|                              | Yes               | 0.07     | 0.01      | 7.35      | 0.00    |
| brain_research_participation | (Intercept)       | 3.89     | 0.01      | 587.86    | 0.00    |
|                              | Yes               | 0.02     | 0.01      | 2.02      | 0.04    |
| relationship                 | (Intercept)       | 3.91     | 0.01      | 521.37    | 0.00    |
|                              | Stable            | -0.03    | 0.01      | -2.66     | 0.01    |

## 1.1.9 Question 1: continuous - Education

| fct                          | term              | estimate | std.error | statistic | p.value |
|------------------------------|-------------------|----------|-----------|-----------|---------|
|                              | (Intercept)       | 3.67     | 0.01      | 464.29    | 0.00    |
| age                          | 41-60             | -0.02    | 0.01      | -1.55     | 0.12    |
|                              | <= 40             | 0.11     | 0.02      | 6.88      | 0.00    |
| education                    | (Intercept)       | 3.76     | 0.01      | 582.87    | 0.00    |
|                              | Lower             | -0.23    | 0.01      | -20.40    | 0.00    |
| gender                       | (Intercept)       | 3.68     | 0.01      | 576.03    | 0.00    |
|                              | Man               | 0.03     | 0.01      | 2.60      | 0.01    |
|                              | Other/Undisclosed | 0.03     | 0.08      | 0.32      | 0.75    |
| healthcare_experience        | (Intercept)       | 3.63     | 0.01      | 529.68    | 0.00    |
|                              | Yes               | 0.15     | 0.01      | 13.63     | 0.00    |
| cognitive_health             | (Intercept)       | 3.70     | 0.01      | 667.00    | 0.00    |
|                              | Below average     | -0.22    | 0.02      | -9.50     | 0.00    |
| mental_health                | (Intercept)       | 3.70     | 0.01      | 642.33    | 0.00    |
|                              | Below average     | -0.15    | 0.02      | -9.54     | 0.00    |
| illness_experience           | (Intercept)       | 3.71     | 0.01      | 531.94    | 0.00    |
|                              | Yes               | -0.05    | 0.01      | -4.79     | 0.00    |
| brain_disease_caregiver      | (Intercept)       | 3.70     | 0.01      | 503.48    | 0.00    |
|                              | Yes               | -0.04    | 0.01      | -3.97     | 0.00    |
| brain_research_participation | (Intercept)       | 3.69     | 0.01      | 516.62    | 0.00    |
|                              | Yes               | -0.01    | 0.01      | -1.08     | 0.28    |
| relationship                 | (Intercept)       | 3.69     | 0.01      | 454.60    | 0.00    |
|                              | Stable            | 0.00     | 0.01      | -0.14     | 0.89    |

## 1.1.10 Question 1: continuous - Profession

| fct                          | term              | estimate | std.error | statistic | p.value |
|------------------------------|-------------------|----------|-----------|-----------|---------|
|                              | (Intercept)       | 3.51     | 0.01      | 451.81    | 0.00    |
| age                          | 41-60             | 0.09     | 0.01      | 7.52      | 0.00    |
|                              | <= 40             | 0.19     | 0.02      | 12.39     | 0.00    |
| education                    | (Intercept)       | 3.62     | 0.01      | 568.60    | 0.00    |
|                              | Lower             | -0.15    | 0.01      | -13.31    | 0.00    |
| gender                       | (Intercept)       | 3.56     | 0.01      | 567.36    | 0.00    |
|                              | Man               | 0.05     | 0.01      | 4.27      | 0.00    |
|                              | Other/Undisclosed | -0.01    | 0.08      | -0.12     | 0.90    |
| healthcare_experience        | (Intercept)       | 3.53     | 0.01      | 523.68    | 0.00    |
|                              | Yes               | 0.11     | 0.01      | 10.03     | 0.00    |
| cognitive_health             | (Intercept)       | 3.58     | 0.01      | 656.35    | 0.00    |
|                              | Below average     | -0.14    | 0.02      | -6.08     | 0.00    |
| mental_health                | (Intercept)       | 3.58     | 0.01      | 630.27    | 0.00    |
|                              | Below average     | -0.05    | 0.02      | -3.07     | 0.00    |
| illness_experience           | (Intercept)       | 3.59     | 0.01      | 523.05    | 0.00    |
|                              | Yes               | -0.03    | 0.01      | -2.52     | 0.01    |
| brain_disease_caregiver      | (Intercept)       | 3.61     | 0.01      | 498.23    | 0.00    |
|                              | Yes               | -0.07    | 0.01      | -6.30     | 0.00    |
| brain_research_participation | (Intercept)       | 3.60     | 0.01      | 513.26    | 0.00    |
|                              | Yes               | -0.07    | 0.01      | -6.48     | 0.00    |
| relationship                 | (Intercept)       | 3.59     | 0.01      | 450.03    | 0.00    |
|                              | Stable            | -0.03    | 0.01      | -2.38     | 0.02    |



## 1.1.11 Question 1: continuous - Income

| fct                          | term              | estimate | std.error | statistic | p.value |
|------------------------------|-------------------|----------|-----------|-----------|---------|
|                              | (Intercept)       | 3.21     | 0.01      | 398.85    | 0.00    |
| age                          | 41-60             | -0.02    | 0.01      | -1.34     | 0.18    |
|                              | <= 40             | -0.13    | 0.02      | -8.24     | 0.00    |
| education                    | (Intercept)       | 3.17     | 0.01      | 480.09    | 0.00    |
|                              | Lower             | 0.03     | 0.01      | 2.85      | 0.00    |
| gender                       | (Intercept)       | 3.20     | 0.01      | 493.23    | 0.00    |
|                              | Man               | -0.06    | 0.01      | -5.03     | 0.00    |
|                              | Other/Undisclosed | 0.10     | 0.08      | 1.21      | 0.23    |
| healthcare_experience        | (Intercept)       | 3.13     | 0.01      | 449.09    | 0.00    |
|                              | Yes               | 0.14     | 0.01      | 12.62     | 0.00    |
| cognitive_health             | (Intercept)       | 3.19     | 0.01      | 564.26    | 0.00    |
|                              | Below average     | -0.06    | 0.02      | -2.64     | 0.01    |
| mental_health                | (Intercept)       | 3.19     | 0.01      | 542.31    | 0.00    |
|                              | Below average     | -0.03    | 0.02      | -1.74     | 0.08    |
| illness_experience           | (Intercept)       | 3.16     | 0.01      | 446.13    | 0.00    |
|                              | Yes               | 0.06     | 0.01      | 4.95      | 0.00    |
| brain_disease_caregiver      | (Intercept)       | 3.18     | 0.01      | 424.25    | 0.00    |
|                              | Yes               | 0.02     | 0.01      | 1.46      | 0.14    |
| brain_research_participation | (Intercept)       | 3.17     | 0.01      | 436.64    | 0.00    |
|                              | Yes               | 0.02     | 0.01      | 2.12      | 0.03    |
| relationship                 | (Intercept)       | 3.18     | 0.01      | 385.82    | 0.00    |
|                              | Stable            | 0.00     | 0.01      | 0.09      | 0.93    |

## 1.2 Binary models

## 1.2.1 Question 1: binary - Substance use

| fct                          | term              | estimate | std.error | statistic | p.value |
|------------------------------|-------------------|----------|-----------|-----------|---------|
|                              | (Intercept)       | 2.26     | 0.03      | 74.47     | 0.00    |
| age                          | 41-60             | 0.53     | 0.05      | 10.25     | 0.00    |
|                              | <= 40             | 0.36     | 0.07      | 5.35      | 0.00    |
| education                    | (Intercept)       | 2.59     | 0.03      | 90.65     | 0.00    |
|                              | Lower             | -0.28    | 0.05      | -6.03     | 0.00    |
| gender                       | (Intercept)       | 2.63     | 0.03      | 92.09     | 0.00    |
|                              | Man               | -0.42    | 0.05      | -8.88     | 0.00    |
|                              | Other/Undisclosed | -0.83    | 0.26      | -3.24     | 0.00    |
| healthcare_experience        | (Intercept)       | 2.35     | 0.03      | 86.09     | 0.00    |
|                              | Yes               | 0.41     | 0.05      | 8.25      | 0.00    |
| cognitive_health             | (Intercept)       | 2.54     | 0.02      | 106.27    | 0.00    |
|                              | Below average     | -0.63    | 0.08      | -8.13     | 0.00    |
| mental_health                | (Intercept)       | 2.51     | 0.02      | 102.24    | 0.00    |
|                              | Below average     | -0.13    | 0.06      | -1.95     | 0.05    |
| illness_experience           | (Intercept)       | 2.58     | 0.03      | 84.53     | 0.00    |
|                              | Yes               | -0.21    | 0.05      | -4.59     | 0.00    |
| brain_disease_caregiver      | (Intercept)       | 2.44     | 0.03      | 80.36     | 0.00    |
|                              | Yes               | 0.12     | 0.05      | 2.66      | 0.01    |
| brain_research_participation | (Intercept)       | 2.49     | 0.03      | 82.75     | 0.00    |
|                              | Yes               | 0.00     | 0.05      | 0.09      | 0.93    |
| relationship                 | (Intercept)       | 2.45     | 0.03      | 72.93     | 0.00    |
|                              | Stable            | 0.08     | 0.05      | 1.78      | 0.08    |

## 1.2.2 Question 1: binary - Genetics

| fct                          | term              | estimate | std.error | statistic | p.value |
|------------------------------|-------------------|----------|-----------|-----------|---------|
|                              | (Intercept)       | 1.62     | 0.02      | 67.72     | 0.00    |
| age                          | 41-60             | 0.01     | 0.04      | 0.27      | 0.79    |
|                              | <= 40             | -0.43    | 0.04      | -10.19    | 0.00    |
| education                    | (Intercept)       | 1.56     | 0.02      | 81.15     | 0.00    |
|                              | Lower             | -0.06    | 0.03      | -1.67     | 0.09    |
| gender                       | (Intercept)       | 1.61     | 0.02      | 84.01     | 0.00    |
|                              | Man               | -0.23    | 0.03      | -6.74     | 0.00    |
|                              | Other/Undisclosed | -0.77    | 0.20      | -3.97     | 0.00    |
| healthcare_experience        | (Intercept)       | 1.50     | 0.02      | 75.21     | 0.00    |
|                              | Yes               | 0.12     | 0.03      | 3.52      | 0.00    |
| cognitive_health             | (Intercept)       | 1.55     | 0.02      | 94.77     | 0.00    |
|                              | Below average     | -0.19    | 0.06      | -2.94     | 0.00    |
| mental_health                | (Intercept)       | 1.54     | 0.02      | 90.69     | 0.00    |
|                              | Below average     | 0.01     | 0.05      | 0.27      | 0.79    |
| illness_experience           | (Intercept)       | 1.52     | 0.02      | 74.65     | 0.00    |
|                              | Yes               | 0.06     | 0.03      | 1.74      | 0.08    |
| brain_disease_caregiver      | (Intercept)       | 1.37     | 0.02      | 66.76     | 0.00    |
|                              | Yes               | 0.39     | 0.03      | 12.18     | 0.00    |
| brain_research_participation | (Intercept)       | 1.45     | 0.02      | 71.10     | 0.00    |
|                              | Yes               | 0.22     | 0.03      | 6.69      | 0.00    |
| relationship                 | (Intercept)       | 1.44     | 0.02      | 62.39     | 0.00    |
|                              | Stable            | 0.18     | 0.03      | 5.83      | 0.00    |

## 1.2.3 Question 1: binary - Physical health

| fct                          | term              | estimate | std.error | statistic | p.value |
|------------------------------|-------------------|----------|-----------|-----------|---------|
|                              | (Intercept)       | 1.87     | 0.03      | 71.58     | 0.00    |
| age                          | 41-60             | 0.13     | 0.04      | 3.28      | 0.00    |
|                              | <= 40             | 0.16     | 0.05      | 2.97      | 0.00    |
| education                    | (Intercept)       | 2.05     | 0.02      | 89.45     | 0.00    |
|                              | Lower             | -0.31    | 0.04      | -8.30     | 0.00    |
| gender                       | (Intercept)       | 2.02     | 0.02      | 90.79     | 0.00    |
|                              | Man               | -0.26    | 0.04      | -6.75     | 0.00    |
|                              | Other/Undisclosed | -0.29    | 0.25      | -1.14     | 0.25    |
| healthcare_experience        | (Intercept)       | 1.79     | 0.02      | 81.42     | 0.00    |
|                              | Yes               | 0.43     | 0.04      | 10.86     | 0.00    |
| cognitive_health             | (Intercept)       | 1.98     | 0.02      | 103.89    | 0.00    |
|                              | Below average     | -0.58    | 0.06      | -8.95     | 0.00    |
| mental_health                | (Intercept)       | 1.98     | 0.02      | 99.84     | 0.00    |
|                              | Below average     | -0.29    | 0.05      | -5.84     | 0.00    |
| illness_experience           | (Intercept)       | 2.02     | 0.02      | 83.15     | 0.00    |
|                              | Yes               | -0.19    | 0.04      | -5.27     | 0.00    |
| brain_disease_caregiver      | (Intercept)       | 1.90     | 0.02      | 77.40     | 0.00    |
|                              | Yes               | 0.10     | 0.04      | 2.75      | 0.01    |
| brain_research_participation | (Intercept)       | 1.92     | 0.02      | 80.03     | 0.00    |
|                              | Yes               | 0.05     | 0.04      | 1.46      | 0.14    |
| relationship                 | (Intercept)       | 1.90     | 0.03      | 70.39     | 0.00    |
|                              | Stable            | 0.07     | 0.04      | 1.84      | 0.07    |

## 1.2.4 Question 1: binary - Sleeping habits

| fct                          | term              | estimate | std.error | statistic | p.value |
|------------------------------|-------------------|----------|-----------|-----------|---------|
|                              | (Intercept)       | 1.36     | 0.02      | 61.79     | 0.00    |
| age                          | 41-60             | 0.72     | 0.04      | 18.89     | 0.00    |
|                              | <= 40             | 1.02     | 0.06      | 17.61     | 0.00    |
| education                    | (Intercept)       | 1.80     | 0.02      | 86.24     | 0.00    |
|                              | Lower             | -0.18    | 0.04      | -5.11     | 0.00    |
| gender                       | (Intercept)       | 1.86     | 0.02      | 88.80     | 0.00    |
|                              | Man               | -0.39    | 0.04      | -10.87    | 0.00    |
|                              | Other/Undisclosed | 0.08     | 0.27      | 0.29      | 0.78    |
| healthcare_experience        | (Intercept)       | 1.63     | 0.02      | 78.39     | 0.00    |
|                              | Yes               | 0.30     | 0.04      | 8.36      | 0.00    |
| cognitive_health             | (Intercept)       | 1.74     | 0.02      | 99.75     | 0.00    |
|                              | Below average     | -0.08    | 0.07      | -1.21     | 0.23    |
| mental_health                | (Intercept)       | 1.70     | 0.02      | 95.01     | 0.00    |
|                              | Below average     | 0.29     | 0.05      | 5.28      | 0.00    |
| illness_experience           | (Intercept)       | 1.69     | 0.02      | 78.50     | 0.00    |
|                              | Yes               | 0.12     | 0.03      | 3.39      | 0.00    |
| brain_disease_caregiver      | (Intercept)       | 1.77     | 0.02      | 75.60     | 0.00    |
|                              | Yes               | -0.06    | 0.03      | -1.68     | 0.09    |
| brain_research_participation | (Intercept)       | 1.90     | 0.02      | 79.81     | 0.00    |
|                              | Yes               | -0.34    | 0.03      | -10.04    | 0.00    |
| relationship                 | (Intercept)       | 1.86     | 0.03      | 69.87     | 0.00    |
|                              | Stable            | -0.21    | 0.03      | -6.01     | 0.00    |

## 1.2.5 Question 1: binary - Social environment

| fct                          | term              | estimate | std.error | statistic | p.value |
|------------------------------|-------------------|----------|-----------|-----------|---------|
|                              | (Intercept)       | 1.38     | 0.02      | 62.38     | 0.00    |
| age                          | 41-60             | 0.29     | 0.03      | 8.18      | 0.00    |
|                              | <= 40             | 0.55     | 0.05      | 10.93     | 0.00    |
| education                    | (Intercept)       | 1.63     | 0.02      | 82.78     | 0.00    |
|                              | Lower             | -0.18    | 0.03      | -5.46     | 0.00    |
| gender                       | (Intercept)       | 1.66     | 0.02      | 85.12     | 0.00    |
|                              | Man               | -0.32    | 0.03      | -9.48     | 0.00    |
|                              | Other/Undisclosed | 0.58     | 0.30      | 1.91      | 0.06    |
| healthcare_experience        | (Intercept)       | 1.43     | 0.02      | 73.23     | 0.00    |
|                              | Yes               | 0.39     | 0.03      | 11.55     | 0.00    |
| cognitive_health             | (Intercept)       | 1.59     | 0.02      | 95.96     | 0.00    |
|                              | Below average     | -0.41    | 0.06      | -6.76     | 0.00    |
| mental_health                | (Intercept)       | 1.56     | 0.02      | 91.36     | 0.00    |
|                              | Below average     | 0.03     | 0.05      | 0.62      | 0.53    |
| illness_experience           | (Intercept)       | 1.59     | 0.02      | 76.29     | 0.00    |
|                              | Yes               | -0.05    | 0.03      | -1.55     | 0.12    |
| brain_disease_caregiver      | (Intercept)       | 1.55     | 0.02      | 71.32     | 0.00    |
|                              | Yes               | 0.04     | 0.03      | 1.41      | 0.16    |
| brain_research_participation | (Intercept)       | 1.60     | 0.02      | 74.70     | 0.00    |
|                              | Yes               | -0.07    | 0.03      | -2.32     | 0.02    |
| relationship                 | (Intercept)       | 1.58     | 0.02      | 65.50     | 0.00    |
|                              | Stable            | -0.03    | 0.03      | -0.86     | 0.39    |

## 1.2.6 Question 1: binary - Life goals

| fct                          | term              | estimate | std.error | statistic | p.value |
|------------------------------|-------------------|----------|-----------|-----------|---------|
|                              | (Intercept)       | 1.06     | 0.02      | 52.30     | 0.00    |
| age                          | 41-60             | -0.05    | 0.03      | -1.73     | 0.08    |
|                              | <= 40             | -0.34    | 0.04      | -9.10     | 0.00    |
| education                    | (Intercept)       | 1.00     | 0.02      | 61.07     | 0.00    |
|                              | Lower             | -0.06    | 0.03      | -2.21     | 0.03    |
| gender                       | (Intercept)       | 1.02     | 0.02      | 62.87     | 0.00    |
|                              | Man               | -0.12    | 0.03      | -4.00     | 0.00    |
|                              | Other/Undisclosed | -0.13    | 0.20      | -0.66     | 0.51    |
| healthcare_experience        | (Intercept)       | 0.89     | 0.02      | 52.63     | 0.00    |
|                              | Yes               | 0.24     | 0.03      | 8.66      | 0.00    |
| cognitive_health             | (Intercept)       | 0.99     | 0.01      | 70.68     | 0.00    |
|                              | Below average     | -0.10    | 0.06      | -1.75     | 0.08    |
| mental_health                | (Intercept)       | 1.01     | 0.01      | 69.23     | 0.00    |
|                              | Below average     | -0.22    | 0.04      | -5.74     | 0.00    |
| illness_experience           | (Intercept)       | 0.97     | 0.02      | 55.48     | 0.00    |
|                              | Yes               | 0.03     | 0.03      | 1.12      | 0.26    |
| brain_disease_caregiver      | (Intercept)       | 1.00     | 0.02      | 53.83     | 0.00    |
|                              | Yes               | -0.04    | 0.03      | -1.44     | 0.15    |
| brain_research_participation | (Intercept)       | 1.05     | 0.02      | 57.29     | 0.00    |
|                              | Yes               | -0.14    | 0.03      | -5.19     | 0.00    |
| relationship                 | (Intercept)       | 0.98     | 0.02      | 47.91     | 0.00    |
|                              | Stable            | 0.01     | 0.03      | 0.45      | 0.65    |

## 1.2.7 Question 1: binary - Physical environment

| fct                          | term              | estimate | std.error | statistic | p.value |
|------------------------------|-------------------|----------|-----------|-----------|---------|
|                              | (Intercept)       | 0.84     | 0.02      | 43.31     | 0.00    |
| age                          | 41-60             | 0.23     | 0.03      | 7.59      | 0.00    |
|                              | <= 40             | 0.09     | 0.04      | 2.42      | 0.02    |
| education                    | (Intercept)       | 0.92     | 0.02      | 56.95     | 0.00    |
|                              | Lower             | 0.06     | 0.03      | 1.90      | 0.06    |
| gender                       | (Intercept)       | 0.98     | 0.02      | 60.95     | 0.00    |
|                              | Man               | -0.15    | 0.03      | -5.16     | 0.00    |
|                              | Other/Undisclosed | 0.27     | 0.21      | 1.27      | 0.20    |
| healthcare_experience        | (Intercept)       | 0.87     | 0.02      | 51.54     | 0.00    |
|                              | Yes               | 0.17     | 0.03      | 6.27      | 0.00    |
| cognitive_health             | (Intercept)       | 0.95     | 0.01      | 68.45     | 0.00    |
|                              | Below average     | -0.23    | 0.05      | -4.22     | 0.00    |
| mental_health                | (Intercept)       | 0.95     | 0.01      | 65.66     | 0.00    |
|                              | Below average     | -0.09    | 0.04      | -2.29     | 0.02    |
| illness_experience           | (Intercept)       | 0.88     | 0.02      | 51.40     | 0.00    |
|                              | Yes               | 0.13     | 0.03      | 4.88      | 0.00    |
| brain_disease_caregiver      | (Intercept)       | 0.92     | 0.02      | 50.32     | 0.00    |
|                              | Yes               | 0.03     | 0.03      | 1.25      | 0.21    |
| brain_research_participation | (Intercept)       | 0.93     | 0.02      | 52.21     | 0.00    |
|                              | Yes               | 0.02     | 0.03      | 0.65      | 0.52    |
| relationship                 | (Intercept)       | 0.97     | 0.02      | 47.76     | 0.00    |
|                              | Stable            | -0.07    | 0.03      | -2.46     | 0.01    |



## 1.2.8 Question 1: binary - Diet

| fct                          | term              | estimate | std.error | statistic | p.value |
|------------------------------|-------------------|----------|-----------|-----------|---------|
|                              | (Intercept)       | 0.69     | 0.02      | 36.76     | 0.00    |
| age                          | 41-60             | 0.43     | 0.03      | 14.59     | 0.00    |
|                              | <= 40             | 0.47     | 0.04      | 11.71     | 0.00    |
| education                    | (Intercept)       | 1.00     | 0.02      | 60.83     | 0.00    |
|                              | Lower             | -0.24    | 0.03      | -8.44     | 0.00    |
| gender                       | (Intercept)       | 1.03     | 0.02      | 63.33     | 0.00    |
|                              | Man               | -0.36    | 0.03      | -12.40    | 0.00    |
|                              | Other/Undisclosed | -0.06    | 0.20      | -0.32     | 0.75    |
| healthcare_experience        | (Intercept)       | 0.80     | 0.02      | 48.06     | 0.00    |
|                              | Yes               | 0.33     | 0.03      | 11.70     | 0.00    |
| cognitive_health             | (Intercept)       | 0.95     | 0.01      | 68.49     | 0.00    |
|                              | Below average     | -0.46    | 0.05      | -8.67     | 0.00    |
| mental_health                | (Intercept)       | 0.96     | 0.01      | 66.14     | 0.00    |
|                              | Below average     | -0.26    | 0.04      | -6.77     | 0.00    |
| illness_experience           | (Intercept)       | 0.98     | 0.02      | 55.61     | 0.00    |
|                              | Yes               | -0.13    | 0.03      | -4.76     | 0.00    |
| brain_disease_caregiver      | (Intercept)       | 0.85     | 0.02      | 46.89     | 0.00    |
|                              | Yes               | 0.17     | 0.03      | 6.29      | 0.00    |
| brain_research_participation | (Intercept)       | 0.90     | 0.02      | 51.08     | 0.00    |
|                              | Yes               | 0.04     | 0.03      | 1.59      | 0.11    |
| relationship                 | (Intercept)       | 0.94     | 0.02      | 46.61     | 0.00    |
|                              | Stable            | -0.04    | 0.03      | -1.41     | 0.16    |

## 1.2.9 Question 1: binary - Education

| fct                          | term              | estimate | std.error | statistic | p.value |
|------------------------------|-------------------|----------|-----------|-----------|---------|
|                              | (Intercept)       | 0.44     | 0.02      | 24.30     | 0.00    |
| age                          | 41-60             | -0.07    | 0.03      | -2.57     | 0.01    |
|                              | <= 40             | 0.11     | 0.04      | 2.97      | 0.00    |
| education                    | (Intercept)       | 0.59     | 0.02      | 38.77     | 0.00    |
|                              | Lower             | -0.48    | 0.03      | -18.32    | 0.00    |
| gender                       | (Intercept)       | 0.40     | 0.01      | 27.28     | 0.00    |
|                              | Man               | 0.12     | 0.03      | 4.40      | 0.00    |
|                              | Other/Undisclosed | 0.20     | 0.19      | 1.09      | 0.28    |
| healthcare_experience        | (Intercept)       | 0.32     | 0.02      | 20.77     | 0.00    |
|                              | Yes               | 0.29     | 0.03      | 11.23     | 0.00    |
| cognitive_health             | (Intercept)       | 0.46     | 0.01      | 35.77     | 0.00    |
|                              | Below average     | -0.39    | 0.05      | -7.57     | 0.00    |
| mental_health                | (Intercept)       | 0.48     | 0.01      | 35.81     | 0.00    |
|                              | Below average     | -0.33    | 0.04      | -9.05     | 0.00    |
| illness_experience           | (Intercept)       | 0.47     | 0.02      | 29.52     | 0.00    |
|                              | Yes               | -0.10    | 0.03      | -4.03     | 0.00    |
| brain_disease_caregiver      | (Intercept)       | 0.47     | 0.02      | 27.85     | 0.00    |
|                              | Yes               | -0.08    | 0.02      | -3.40     | 0.00    |
| brain_research_participation | (Intercept)       | 0.44     | 0.02      | 26.81     | 0.00    |
|                              | Yes               | -0.02    | 0.02      | -0.61     | 0.54    |
| relationship                 | (Intercept)       | 0.42     | 0.02      | 22.55     | 0.00    |
|                              | Stable            | 0.03     | 0.02      | 1.03      | 0.30    |

## 1.2.10 Question 1: binary - Profession

| fct                          | term              | estimate | std.error | statistic | p.value |
|------------------------------|-------------------|----------|-----------|-----------|---------|
|                              | (Intercept)       | 0.13     | 0.02      | 7.30      | 0.00    |
| age                          | 41-60             | 0.15     | 0.03      | 5.61      | 0.00    |
|                              | <= 40             | 0.29     | 0.04      | 8.08      | 0.00    |
| education                    | (Intercept)       | 0.32     | 0.01      | 21.78     | 0.00    |
|                              | Lower             | -0.28    | 0.03      | -10.78    | 0.00    |
| gender                       | (Intercept)       | 0.19     | 0.01      | 12.91     | 0.00    |
|                              | Man               | 0.17     | 0.03      | 6.11      | 0.00    |
|                              | Other/Undisclosed | -0.01    | 0.18      | -0.07     | 0.95    |
| healthcare_experience        | (Intercept)       | 0.15     | 0.02      | 9.99      | 0.00    |
|                              | Yes               | 0.20     | 0.03      | 8.10      | 0.00    |
| cognitive_health             | (Intercept)       | 0.24     | 0.01      | 19.47     | 0.00    |
|                              | Below average     | -0.20    | 0.05      | -3.92     | 0.00    |
| mental_health                | (Intercept)       | 0.25     | 0.01      | 19.12     | 0.00    |
|                              | Below average     | -0.13    | 0.04      | -3.69     | 0.00    |
| illness_experience           | (Intercept)       | 0.26     | 0.02      | 16.25     | 0.00    |
|                              | Yes               | -0.06    | 0.02      | -2.38     | 0.02    |
| brain_disease_caregiver      | (Intercept)       | 0.29     | 0.02      | 17.29     | 0.00    |
|                              | Yes               | -0.12    | 0.02      | -4.94     | 0.00    |
| brain_research_participation | (Intercept)       | 0.29     | 0.02      | 18.13     | 0.00    |
|                              | Yes               | -0.14    | 0.02      | -5.77     | 0.00    |
| relationship                 | (Intercept)       | 0.24     | 0.02      | 13.32     | 0.00    |
|                              | Stable            | -0.02    | 0.02      | -0.86     | 0.39    |

## 1.2.11 Question 1: binary - Income

| fct                          | term              | estimate | std.error | statistic | p.value |
|------------------------------|-------------------|----------|-----------|-----------|---------|
|                              | (Intercept)       | -0.54    | 0.02      | -29.28    | 0.00    |
| age                          | 41-60             | -0.02    | 0.03      | -0.87     | 0.38    |
|                              | <= 40             | -0.21    | 0.04      | -5.81     | 0.00    |
| education                    | (Intercept)       | -0.62    | 0.02      | -40.31    | 0.00    |
|                              | Lower             | 0.10     | 0.03      | 3.86      | 0.00    |
| gender                       | (Intercept)       | -0.57    | 0.01      | -38.16    | 0.00    |
|                              | Man               | -0.05    | 0.03      | -1.88     | 0.06    |
|                              | Other/Undisclosed | 0.17     | 0.18      | 0.93      | 0.35    |
| healthcare_experience        | (Intercept)       | -0.69    | 0.02      | -42.09    | 0.00    |
|                              | Yes               | 0.27     | 0.03      | 10.31     | 0.00    |
| cognitive_health             | (Intercept)       | -0.58    | 0.01      | -45.02    | 0.00    |
|                              | Below average     | 0.04     | 0.05      | 0.74      | 0.46    |
| mental_health                | (Intercept)       | -0.58    | 0.01      | -43.13    | 0.00    |
|                              | Below average     | 0.00     | 0.04      | 0.07      | 0.94    |
| illness_experience           | (Intercept)       | -0.64    | 0.02      | -38.97    | 0.00    |
|                              | Yes               | 0.14     | 0.03      | 5.57      | 0.00    |
| brain_disease_caregiver      | (Intercept)       | -0.60    | 0.02      | -34.83    | 0.00    |
|                              | Yes               | 0.04     | 0.03      | 1.58      | 0.11    |
| brain_research_participation | (Intercept)       | -0.61    | 0.02      | -36.13    | 0.00    |
|                              | Yes               | 0.05     | 0.03      | 2.11      | 0.03    |
| relationship                 | (Intercept)       | -0.58    | 0.02      | -30.68    | 0.00    |
|                              | Stable            | 0.00     | 0.03      | -0.05     | 0.96    |

## 1.3 Ordinal models

## 1.3.1 Question 1: ordinal - Substance use

| fct                   | term               | estimate | std.error | statistic | coef.type   |
|-----------------------|--------------------|----------|-----------|-----------|-------------|
| age                   | 41-60              | 0.39     | 0.03      | 14.67     | coefficient |
|                       | <= 40              | 0.34     | 0.04      | 9.72      | coefficient |
|                       | No influence Weak  | -4.46    | 0.06      | -70.54    | scale       |
|                       | Weak Moderate      | -3.83    | 0.05      | -81.10    | scale       |
|                       | Moderate Strong    | -2.30    | 0.03      | -90.12    | scale       |
|                       | Strong Very strong | -0.24    | 0.02      | -13.80    | scale       |
| education             | Lower              | -0.09    | 0.03      | -3.35     | coefficient |
|                       | No influence Weak  | -4.68    | 0.06      | -74.45    | scale       |
|                       | Weak Moderate      | -4.05    | 0.05      | -86.82    | scale       |
|                       | Moderate Strong    | -2.52    | 0.02      | -104.14   | scale       |
|                       | Strong Very strong | -0.47    | 0.01      | -31.83    | scale       |
| gender                | Man                | -0.29    | 0.03      | -10.73    | coefficient |
|                       | Other/Undisclosed  | -0.43    | 0.18      | -2.47     | coefficient |
|                       | No influence Weak  | -4.74    | 0.06      | -75.43    | scale       |
|                       | Weak Moderate      | -4.11    | 0.05      | -88.06    | scale       |
|                       | Moderate Strong    | -2.58    | 0.02      | -106.26   | scale       |
| healthcare_experience | Strong Very strong | -0.53    | 0.01      | -35.98    | scale       |
|                       | Yes                | 0.28     | 0.03      | 10.92     | coefficient |
|                       | No influence Weak  | -4.55    | 0.06      | -72.48    | scale       |
|                       | Weak Moderate      | -3.92    | 0.05      | -84.11    | scale       |
|                       | Moderate Strong    | -2.39    | 0.02      | -98.36    | scale       |
| cognitive_health      | Strong Very strong | -0.34    | 0.02      | -21.92    | scale       |
|                       | Below average      | -0.37    | 0.05      | -7.45     | coefficient |
|                       | No influence Weak  | -4.67    | 0.06      | -75.00    | scale       |
|                       | Weak Moderate      | -4.05    | 0.05      | -87.95    | scale       |
|                       | Moderate Strong    | -2.52    | 0.02      | -109.46   | scale       |
| mental_health         | Strong Very strong | -0.47    | 0.01      | -36.63    | scale       |
|                       | Below average      | -0.07    | 0.04      | -1.99     | coefficient |
|                       | No influence Weak  | -4.66    | 0.06      | -74.64    | scale       |
|                       | Weak Moderate      | -4.03    | 0.05      | -87.40    | scale       |
|                       | Moderate Strong    | -2.50    | 0.02      | -107.73   | scale       |
|                       | Strong Very strong | -0.45    | 0.01      | -34.30    | scale       |
|                       | Yes                | -0.09    | 0.02      | -3.69     | coefficient |
|                       | No influence Weak  | -4.69    | 0.06      | -74.23    | scale       |
|                       | Weak Moderate      | -4.06    | 0.05      | -86.32    | scale       |
|                       | Moderate Strong    | -2.53    | 0.02      | -101.57   | scale       |

*(continued)*

| illness_experience           | term               | estimate | std.error | statistic | coef.type   |
|------------------------------|--------------------|----------|-----------|-----------|-------------|
|                              | Strong Very strong | -0.48    | 0.02      | -30.26    | scale       |
|                              | Yes                | 0.00     | 0.02      | -0.07     | coefficient |
|                              | No influence Weak  | -4.65    | 0.06      | -73.52    | scale       |
|                              | Weak Moderate      | -4.02    | 0.05      | -85.14    | scale       |
| brain_disease_caregiver      | Moderate Strong    | -2.49    | 0.03      | -98.15    | scale       |
|                              | Strong Very strong | -0.45    | 0.02      | -26.55    | scale       |
|                              | Yes                | -0.07    | 0.02      | -2.85     | coefficient |
|                              | No influence Weak  | -4.68    | 0.06      | -74.10    | scale       |
|                              | Weak Moderate      | -4.05    | 0.05      | -85.99    | scale       |
| brain_research_participation | Moderate Strong    | -2.52    | 0.03      | -100.22   | scale       |
|                              | Strong Very strong | -0.48    | 0.02      | -29.08    | scale       |
|                              | Stable             | 0.02     | 0.02      | 0.64      | coefficient |
|                              | No influence Weak  | -4.64    | 0.06      | -72.86    | scale       |
|                              | Weak Moderate      | -4.01    | 0.05      | -83.90    | scale       |
| relationship                 | Moderate Strong    | -2.48    | 0.03      | -93.80    | scale       |
|                              | Strong Very strong | -0.44    | 0.02      | -23.67    | scale       |

## 1.3.2 Question 1: ordinal - Genetics

| fct                   | term               | estimate | std.error | statistic | coef.type   |
|-----------------------|--------------------|----------|-----------|-----------|-------------|
| age                   | 41-60              | 0.06     | 0.02      | 2.43      | coefficient |
|                       | <= 40              | -0.26    | 0.03      | -8.02     | coefficient |
|                       | No influence Weak  | -5.52    | 0.10      | -58.02    | scale       |
|                       | Weak Moderate      | -3.74    | 0.04      | -90.21    | scale       |
|                       | Moderate Strong    | -1.56    | 0.02      | -78.11    | scale       |
|                       | Strong Very strong | 0.48     | 0.02      | 27.58     | scale       |
| education             | Lower              | -0.04    | 0.02      | -1.68     | coefficient |
|                       | No influence Weak  | -5.50    | 0.09      | -58.18    | scale       |
|                       | Weak Moderate      | -3.72    | 0.04      | -92.50    | scale       |
|                       | Moderate Strong    | -1.55    | 0.02      | -88.31    | scale       |
|                       | Strong Very strong | 0.48     | 0.01      | 33.17     | scale       |
| gender                | Man                | -0.20    | 0.03      | -8.11     | coefficient |
|                       | Other/Undisclosed  | -0.72    | 0.17      | -4.28     | coefficient |
|                       | No influence Weak  | -5.56    | 0.09      | -58.73    | scale       |
|                       | Weak Moderate      | -3.78    | 0.04      | -93.72    | scale       |
|                       | Moderate Strong    | -1.61    | 0.02      | -91.27    | scale       |
| healthcare_experience | Strong Very strong | 0.44     | 0.01      | 30.60     | scale       |
|                       | Yes                | 0.08     | 0.02      | 3.46      | coefficient |
|                       | No influence Weak  | -5.46    | 0.09      | -57.67    | scale       |
|                       | Weak Moderate      | -3.68    | 0.04      | -90.99    | scale       |
|                       | Moderate Strong    | -1.51    | 0.02      | -83.44    | scale       |
| cognitive_health      | Strong Very strong | 0.53     | 0.02      | 34.26     | scale       |
|                       | Below average      | -0.07    | 0.05      | -1.43     | coefficient |
|                       | No influence Weak  | -5.49    | 0.09      | -58.25    | scale       |
|                       | Weak Moderate      | -3.71    | 0.04      | -93.77    | scale       |
|                       | Moderate Strong    | -1.55    | 0.02      | -96.07    | scale       |
| mental_health         | Strong Very strong | 0.49     | 0.01      | 38.60     | scale       |
|                       | Below average      | 0.07     | 0.03      | 1.98      | coefficient |
|                       | No influence Weak  | -5.48    | 0.09      | -58.09    | scale       |
|                       | Weak Moderate      | -3.70    | 0.04      | -93.19    | scale       |
|                       | Moderate Strong    | -1.53    | 0.02      | -93.54    | scale       |
|                       | Strong Very strong | 0.50     | 0.01      | 38.23     | scale       |
|                       | Yes                | 0.06     | 0.02      | 2.63      | coefficient |
|                       | No influence Weak  | -5.47    | 0.09      | -57.72    | scale       |
|                       | Weak Moderate      | -3.69    | 0.04      | -90.97    | scale       |
|                       | Moderate Strong    | -1.52    | 0.02      | -83.06    | scale       |

*(continued)*

| illness_experience           | term               | estimate | std.error | statistic | coef.type   |
|------------------------------|--------------------|----------|-----------|-----------|-------------|
|                              | Strong Very strong | 0.52     | 0.02      | 33.45     | scale       |
|                              | Yes                | 0.33     | 0.02      | 14.68     | coefficient |
|                              | No influence Weak  | -5.35    | 0.09      | -56.46    | scale       |
| brain_disease_caregiver      | Weak Moderate      | -3.57    | 0.04      | -87.86    | scale       |
|                              | Moderate Strong    | -1.39    | 0.02      | -74.82    | scale       |
|                              | Strong Very strong | 0.66     | 0.02      | 39.48     | scale       |
|                              | Yes                | 0.18     | 0.02      | 7.88      | coefficient |
|                              | No influence Weak  | -5.42    | 0.09      | -57.18    | scale       |
| brain_research_participation | Weak Moderate      | -3.64    | 0.04      | -89.64    | scale       |
|                              | Moderate Strong    | -1.47    | 0.02      | -79.50    | scale       |
|                              | Strong Very strong | 0.58     | 0.02      | 35.91     | scale       |
|                              | Stable             | 0.13     | 0.02      | 5.75      | coefficient |
|                              | No influence Weak  | -5.42    | 0.10      | -57.00    | scale       |
| relationship                 | Weak Moderate      | -3.64    | 0.04      | -87.98    | scale       |
|                              | Moderate Strong    | -1.47    | 0.02      | -72.90    | scale       |
|                              | Strong Very strong | 0.57     | 0.02      | 31.78     | scale       |



## 1.3.3 Question 1: ordinal - Physical health

| fct                   | term               | estimate | std.error | statistic | coef.type   |
|-----------------------|--------------------|----------|-----------|-----------|-------------|
| age                   | 41-60              | 0.20     | 0.03      | 7.91      | coefficient |
|                       | <= 40              | 0.27     | 0.03      | 8.06      | coefficient |
|                       | No influence Weak  | -5.95    | 0.13      | -47.31    | scale       |
|                       | Weak Moderate      | -4.04    | 0.05      | -80.42    | scale       |
|                       | Moderate Strong    | -1.83    | 0.02      | -84.28    | scale       |
|                       | Strong Very strong | 0.67     | 0.02      | 37.75     | scale       |
| education             | Lower              | -0.31    | 0.03      | -12.46    | coefficient |
|                       | No influence Weak  | -6.17    | 0.13      | -49.15    | scale       |
|                       | Weak Moderate      | -4.26    | 0.05      | -85.72    | scale       |
|                       | Moderate Strong    | -2.05    | 0.02      | -101.07   | scale       |
|                       | Strong Very strong | 0.46     | 0.01      | 31.42     | scale       |
| gender                | Man                | -0.17    | 0.03      | -6.76     | coefficient |
|                       | Other/Undisclosed  | 0.01     | 0.17      | 0.07      | coefficient |
|                       | No influence Weak  | -6.11    | 0.13      | -48.76    | scale       |
|                       | Weak Moderate      | -4.20    | 0.05      | -84.92    | scale       |
|                       | Moderate Strong    | -1.99    | 0.02      | -100.46   | scale       |
| healthcare_experience | Strong Very strong | 0.51     | 0.01      | 35.05     | scale       |
|                       | Yes                | 0.33     | 0.02      | 13.89     | coefficient |
|                       | No influence Weak  | -5.94    | 0.13      | -47.40    | scale       |
|                       | Weak Moderate      | -4.03    | 0.05      | -81.54    | scale       |
|                       | Moderate Strong    | -1.82    | 0.02      | -91.10    | scale       |
| cognitive_health      | Strong Very strong | 0.69     | 0.02      | 43.32     | scale       |
|                       | Below average      | -0.41    | 0.05      | -8.22     | coefficient |
|                       | No influence Weak  | -6.09    | 0.13      | -48.64    | scale       |
|                       | Weak Moderate      | -4.18    | 0.05      | -85.31    | scale       |
|                       | Moderate Strong    | -1.97    | 0.02      | -105.97   | scale       |
| mental_health         | Strong Very strong | 0.53     | 0.01      | 41.47     | scale       |
|                       | Below average      | -0.19    | 0.03      | -5.38     | coefficient |
|                       | No influence Weak  | -6.09    | 0.13      | -48.59    | scale       |
|                       | Weak Moderate      | -4.18    | 0.05      | -85.07    | scale       |
|                       | Moderate Strong    | -1.97    | 0.02      | -104.22   | scale       |
|                       | Strong Very strong | 0.53     | 0.01      | 39.99     | scale       |
|                       | Yes                | -0.13    | 0.02      | -5.53     | coefficient |
|                       | No influence Weak  | -6.11    | 0.13      | -48.70    | scale       |
|                       | Weak Moderate      | -4.20    | 0.05      | -84.34    | scale       |
|                       | Moderate Strong    | -2.00    | 0.02      | -96.25    | scale       |

*(continued)*

| illness_experience           | term               | estimate | std.error | statistic | coef.type   |
|------------------------------|--------------------|----------|-----------|-----------|-------------|
|                              | Strong Very strong | 0.50     | 0.02      | 32.13     | scale       |
|                              | Yes                | 0.12     | 0.02      | 5.03      | coefficient |
|                              | No influence Weak  | -6.01    | 0.13      | -47.83    | scale       |
| brain_disease_caregiver      | Weak Moderate      | -4.10    | 0.05      | -82.10    | scale       |
|                              | Moderate Strong    | -1.89    | 0.02      | -89.99    | scale       |
|                              | Strong Very strong | 0.61     | 0.02      | 36.60     | scale       |
|                              | Yes                | 0.06     | 0.02      | 2.39      | coefficient |
|                              | No influence Weak  | -6.04    | 0.13      | -48.08    | scale       |
| brain_research_participation | Weak Moderate      | -4.13    | 0.05      | -82.83    | scale       |
|                              | Moderate Strong    | -1.92    | 0.02      | -92.45    | scale       |
|                              | Strong Very strong | 0.58     | 0.02      | 35.84     | scale       |
|                              | Stable             | 0.00     | 0.02      | 0.02      | coefficient |
|                              | No influence Weak  | -6.06    | 0.13      | -48.16    | scale       |
| relationship                 | Weak Moderate      | -4.15    | 0.05      | -82.11    | scale       |
|                              | Moderate Strong    | -1.94    | 0.02      | -86.55    | scale       |
|                              | Strong Very strong | 0.55     | 0.02      | 30.60     | scale       |

## 1.3.4 Question 1: ordinal - Sleeping habits

| fct                   | term               | estimate | std.error | statistic | coef.type   |
|-----------------------|--------------------|----------|-----------|-----------|-------------|
| age                   | 41-60              | 0.74     | 0.03      | 28.81     | coefficient |
|                       | <= 40              | 1.14     | 0.03      | 33.41     | coefficient |
|                       | No influence Weak  | -5.44    | 0.11      | -49.04    | scale       |
|                       | Weak Moderate      | -3.69    | 0.05      | -77.33    | scale       |
|                       | Moderate Strong    | -1.35    | 0.02      | -67.92    | scale       |
|                       | Strong Very strong | 1.07     | 0.02      | 56.79     | scale       |
| education             | Lower              | -0.15    | 0.02      | -6.24     | coefficient |
|                       | No influence Weak  | -5.86    | 0.11      | -52.86    | scale       |
|                       | Weak Moderate      | -4.11    | 0.05      | -86.58    | scale       |
|                       | Moderate Strong    | -1.79    | 0.02      | -95.26    | scale       |
|                       | Strong Very strong | 0.53     | 0.01      | 36.39     | scale       |
| gender                | Man                | -0.32    | 0.03      | -12.44    | coefficient |
|                       | Other/Undisclosed  | 0.14     | 0.17      | 0.85      | coefficient |
|                       | No influence Weak  | -5.91    | 0.11      | -53.29    | scale       |
|                       | Weak Moderate      | -4.16    | 0.05      | -87.53    | scale       |
|                       | Moderate Strong    | -1.84    | 0.02      | -97.66    | scale       |
| healthcare_experience | Strong Very strong | 0.50     | 0.01      | 34.50     | scale       |
|                       | Yes                | 0.27     | 0.02      | 11.54     | coefficient |
|                       | No influence Weak  | -5.71    | 0.11      | -51.54    | scale       |
|                       | Weak Moderate      | -3.97    | 0.05      | -83.53    | scale       |
|                       | Moderate Strong    | -1.64    | 0.02      | -86.84    | scale       |
| cognitive_health      | Strong Very strong | 0.69     | 0.02      | 43.78     | scale       |
|                       | Below average      | 0.13     | 0.05      | 2.56      | coefficient |
|                       | No influence Weak  | -5.80    | 0.11      | -52.46    | scale       |
|                       | Weak Moderate      | -4.05    | 0.05      | -86.56    | scale       |
|                       | Moderate Strong    | -1.73    | 0.02      | -101.13   | scale       |
| mental_health         | Strong Very strong | 0.59     | 0.01      | 45.60     | scale       |
|                       | Below average      | 0.33     | 0.03      | 9.69      | coefficient |
|                       | No influence Weak  | -5.77    | 0.11      | -52.18    | scale       |
|                       | Weak Moderate      | -4.02    | 0.05      | -85.77    | scale       |
|                       | Moderate Strong    | -1.70    | 0.02      | -97.95    | scale       |
|                       | Strong Very strong | 0.63     | 0.01      | 46.59     | scale       |
|                       | Yes                | 0.11     | 0.02      | 4.68      | coefficient |
|                       | No influence Weak  | -5.77    | 0.11      | -52.00    | scale       |
|                       | Weak Moderate      | -4.02    | 0.05      | -84.40    | scale       |
|                       | Moderate Strong    | -1.70    | 0.02      | -88.30    | scale       |

*(continued)*

| illness_experience           | term               | estimate | std.error | statistic | coef.type   |
|------------------------------|--------------------|----------|-----------|-----------|-------------|
|                              | Strong Very strong | 0.63     | 0.02      | 39.62     | scale       |
|                              | Yes                | -0.10    | 0.02      | -4.43     | coefficient |
|                              | No influence Weak  | -5.86    | 0.11      | -52.74    | scale       |
| brain_disease_caregiver      | Weak Moderate      | -4.11    | 0.05      | -85.51    | scale       |
|                              | Moderate Strong    | -1.79    | 0.02      | -88.46    | scale       |
|                              | Strong Very strong | 0.53     | 0.02      | 32.47     | scale       |
|                              | Yes                | -0.32    | 0.02      | -13.94    | coefficient |
|                              | No influence Weak  | -5.96    | 0.11      | -53.64    | scale       |
| brain_research_participation | Weak Moderate      | -4.21    | 0.05      | -87.55    | scale       |
|                              | Moderate Strong    | -1.89    | 0.02      | -93.42    | scale       |
|                              | Strong Very strong | 0.45     | 0.02      | 28.09     | scale       |
|                              | Stable             | -0.27    | 0.02      | -11.56    | coefficient |
|                              | No influence Weak  | -5.97    | 0.11      | -53.55    | scale       |
| relationship                 | Weak Moderate      | -4.22    | 0.05      | -86.43    | scale       |
|                              | Moderate Strong    | -1.90    | 0.02      | -86.79    | scale       |
|                              | Strong Very strong | 0.43     | 0.02      | 24.26     | scale       |

## 1.3.5 Question 1: ordinal - Social environment

| fct                   | term               | estimate | std.error | statistic | coef.type   |
|-----------------------|--------------------|----------|-----------|-----------|-------------|
| age                   | 41-60              | 0.31     | 0.03      | 12.49     | coefficient |
|                       | <= 40              | 0.69     | 0.03      | 20.60     | coefficient |
|                       | No influence Weak  | -5.54    | 0.11      | -51.62    | scale       |
|                       | Weak Moderate      | -3.53    | 0.04      | -85.29    | scale       |
|                       | Moderate Strong    | -1.36    | 0.02      | -69.53    | scale       |
|                       | Strong Very strong | 0.87     | 0.02      | 47.81     | scale       |
| education             | Lower              | -0.14    | 0.02      | -5.87     | coefficient |
|                       | No influence Weak  | -5.79    | 0.11      | -54.06    | scale       |
|                       | Weak Moderate      | -3.78    | 0.04      | -92.66    | scale       |
|                       | Moderate Strong    | -1.61    | 0.02      | -90.26    | scale       |
|                       | Strong Very strong | 0.58     | 0.01      | 39.71     | scale       |
| gender                | Man                | -0.26    | 0.03      | -10.44    | coefficient |
|                       | Other/Undisclosed  | 0.49     | 0.17      | 2.88      | coefficient |
|                       | No influence Weak  | -5.82    | 0.11      | -54.37    | scale       |
|                       | Weak Moderate      | -3.82    | 0.04      | -93.47    | scale       |
|                       | Moderate Strong    | -1.64    | 0.02      | -92.34    | scale       |
| healthcare_experience | Strong Very strong | 0.56     | 0.01      | 38.71     | scale       |
|                       | Yes                | 0.33     | 0.02      | 14.11     | coefficient |
|                       | No influence Weak  | -5.63    | 0.11      | -52.55    | scale       |
|                       | Weak Moderate      | -3.62    | 0.04      | -88.81    | scale       |
|                       | Moderate Strong    | -1.45    | 0.02      | -80.46    | scale       |
| cognitive_health      | Strong Very strong | 0.76     | 0.02      | 47.99     | scale       |
|                       | Below average      | -0.28    | 0.05      | -5.79     | coefficient |
|                       | No influence Weak  | -5.76    | 0.11      | -53.93    | scale       |
|                       | Weak Moderate      | -3.76    | 0.04      | -93.54    | scale       |
|                       | Moderate Strong    | -1.58    | 0.02      | -97.31    | scale       |
| mental_health         | Strong Very strong | 0.61     | 0.01      | 47.36     | scale       |
|                       | Below average      | 0.12     | 0.03      | 3.44      | coefficient |
|                       | No influence Weak  | -5.73    | 0.11      | -53.60    | scale       |
|                       | Weak Moderate      | -3.72    | 0.04      | -92.56    | scale       |
|                       | Moderate Strong    | -1.55    | 0.02      | -94.06    | scale       |
|                       | Strong Very strong | 0.64     | 0.01      | 47.92     | scale       |
|                       | Yes                | -0.04    | 0.02      | -1.55     | coefficient |
|                       | No influence Weak  | -5.76    | 0.11      | -53.70    | scale       |
|                       | Weak Moderate      | -3.75    | 0.04      | -91.26    | scale       |
|                       | Moderate Strong    | -1.58    | 0.02      | -85.29    | scale       |

*(continued)*

| illness_experience           | term               | estimate | std.error | statistic | coef.type   |
|------------------------------|--------------------|----------|-----------|-----------|-------------|
|                              | Strong Very strong | 0.61     | 0.02      | 39.10     | scale       |
|                              | Yes                | 0.02     | 0.02      | 0.99      | coefficient |
|                              | No influence Weak  | -5.73    | 0.11      | -53.41    | scale       |
|                              | Weak Moderate      | -3.73    | 0.04      | -90.10    | scale       |
|                              | Moderate Strong    | -1.56    | 0.02      | -81.28    | scale       |
| brain_disease_caregiver      | Strong Very strong | 0.64     | 0.02      | 38.63     | scale       |
|                              | Yes                | -0.10    | 0.02      | -4.47     | coefficient |
|                              | No influence Weak  | -5.79    | 0.11      | -53.95    | scale       |
|                              | Weak Moderate      | -3.78    | 0.04      | -91.56    | scale       |
|                              | Moderate Strong    | -1.61    | 0.02      | -85.02    | scale       |
| brain_research_participation | Strong Very strong | 0.58     | 0.02      | 36.48     | scale       |
|                              | Stable             | -0.12    | 0.02      | -5.23     | coefficient |
|                              | No influence Weak  | -5.81    | 0.11      | -54.01    | scale       |
|                              | Weak Moderate      | -3.81    | 0.04      | -90.29    | scale       |
|                              | Moderate Strong    | -1.63    | 0.02      | -78.89    | scale       |
| relationship                 | Strong Very strong | 0.56     | 0.02      | 31.25     | scale       |

## 1.3.6 Question 1: ordinal - Life goals

| fct                   | term               | estimate | std.error | statistic | coef.type   |
|-----------------------|--------------------|----------|-----------|-----------|-------------|
| age                   | 41-60              | 0.02     | 0.02      | 0.87      | coefficient |
|                       | <= 40              | -0.17    | 0.03      | -5.34     | coefficient |
|                       | No influence Weak  | -4.63    | 0.06      | -74.53    | scale       |
|                       | Weak Moderate      | -2.92    | 0.03      | -98.27    | scale       |
|                       | Moderate Strong    | -1.00    | 0.02      | -55.54    | scale       |
|                       | Strong Very strong | 1.01     | 0.02      | 55.67     | scale       |
| education             | Lower              | -0.08    | 0.02      | -3.26     | coefficient |
|                       | No influence Weak  | -4.63    | 0.06      | -75.38    | scale       |
|                       | Weak Moderate      | -2.93    | 0.03      | -103.62   | scale       |
|                       | Moderate Strong    | -1.01    | 0.02      | -64.62    | scale       |
| gender                | Strong Very strong | 1.00     | 0.02      | 64.24     | scale       |
|                       | Man                | -0.13    | 0.02      | -5.35     | coefficient |
|                       | Other/Undisclosed  | 0.06     | 0.17      | 0.35      | coefficient |
|                       | No influence Weak  | -4.65    | 0.06      | -75.58    | scale       |
|                       | Weak Moderate      | -2.94    | 0.03      | -104.40   | scale       |
| healthcare_experience | Moderate Strong    | -1.02    | 0.02      | -66.35    | scale       |
|                       | Strong Very strong | 0.99     | 0.02      | 64.49     | scale       |
|                       | Yes                | 0.24     | 0.02      | 10.53     | coefficient |
|                       | No influence Weak  | -4.52    | 0.06      | -73.52    | scale       |
|                       | Weak Moderate      | -2.81    | 0.03      | -99.32    | scale       |
| cognitive_health      | Moderate Strong    | -0.89    | 0.02      | -55.81    | scale       |
|                       | Strong Very strong | 1.12     | 0.02      | 67.64     | scale       |
|                       | Below average      | -0.10    | 0.05      | -2.05     | coefficient |
|                       | No influence Weak  | -4.61    | 0.06      | -75.60    | scale       |
|                       | Weak Moderate      | -2.91    | 0.03      | -106.49   | scale       |
| mental_health         | Moderate Strong    | -0.99    | 0.01      | -71.40    | scale       |
|                       | Strong Very strong | 1.02     | 0.01      | 73.06     | scale       |
|                       | Below average      | -0.11    | 0.03      | -3.12     | coefficient |
|                       | No influence Weak  | -4.62    | 0.06      | -75.58    | scale       |
|                       | Weak Moderate      | -2.92    | 0.03      | -105.90   | scale       |
|                       | Moderate Strong    | -1.00    | 0.01      | -70.04    | scale       |
|                       | Strong Very strong | 1.01     | 0.01      | 70.80     | scale       |
|                       | Yes                | 0.04     | 0.02      | 1.74      | coefficient |
|                       | No influence Weak  | -4.59    | 0.06      | -74.52    | scale       |
|                       | Weak Moderate      | -2.89    | 0.03      | -100.89   | scale       |
|                       | Moderate Strong    | -0.97    | 0.02      | -59.31    | scale       |

*(continued)*

| illness_experience           | term               | estimate | std.error | statistic | coef.type   |
|------------------------------|--------------------|----------|-----------|-----------|-------------|
|                              | Strong Very strong | 1.04     | 0.02      | 63.02     | scale       |
|                              | Yes                | -0.03    | 0.02      | -1.45     | coefficient |
|                              | No influence Weak  | -4.62    | 0.06      | -74.73    | scale       |
| brain_disease_caregiver      | Weak Moderate      | -2.92    | 0.03      | -100.18   | scale       |
|                              | Moderate Strong    | -1.00    | 0.02      | -58.29    | scale       |
|                              | Strong Very strong | 1.01     | 0.02      | 58.85     | scale       |
|                              | Yes                | -0.15    | 0.02      | -6.60     | coefficient |
|                              | No influence Weak  | -4.67    | 0.06      | -75.61    | scale       |
| brain_research_participation | Weak Moderate      | -2.97    | 0.03      | -102.21   | scale       |
|                              | Moderate Strong    | -1.05    | 0.02      | -62.08    | scale       |
|                              | Strong Very strong | 0.96     | 0.02      | 57.71     | scale       |
|                              | Stable             | -0.04    | 0.02      | -1.57     | coefficient |
|                              | No influence Weak  | -4.63    | 0.06      | -74.30    | scale       |
| relationship                 | Weak Moderate      | -2.92    | 0.03      | -97.38    | scale       |
|                              | Moderate Strong    | -1.00    | 0.02      | -53.84    | scale       |
|                              | Strong Very strong | 1.01     | 0.02      | 53.97     | scale       |



## 1.3.7 Question 1: ordinal - Physical environment

| fct                   | term               | estimate | std.error | statistic | coef.type   |
|-----------------------|--------------------|----------|-----------|-----------|-------------|
| age                   | 41-60              | 0.20     | 0.02      | 8.20      | coefficient |
|                       | <= 40              | 0.13     | 0.03      | 3.99      | coefficient |
|                       | No influence Weak  | -5.48    | 0.10      | -55.39    | scale       |
|                       | Weak Moderate      | -3.06    | 0.03      | -93.95    | scale       |
|                       | Moderate Strong    | -0.84    | 0.02      | -46.96    | scale       |
|                       | Strong Very strong | 1.17     | 0.02      | 62.60     | scale       |
| education             | Lower              | 0.06     | 0.02      | 2.28      | coefficient |
|                       | No influence Weak  | -5.55    | 0.10      | -56.38    | scale       |
|                       | Weak Moderate      | -3.14    | 0.03      | -100.07   | scale       |
|                       | Moderate Strong    | -0.92    | 0.02      | -59.88    | scale       |
| gender                | Strong Very strong | 1.09     | 0.02      | 68.64     | scale       |
|                       | Man                | -0.16    | 0.02      | -6.41     | coefficient |
|                       | Other/Undisclosed  | 0.29     | 0.17      | 1.72      | coefficient |
|                       | No influence Weak  | -5.62    | 0.10      | -57.01    | scale       |
|                       | Weak Moderate      | -3.20    | 0.03      | -101.87   | scale       |
| healthcare_experience | Moderate Strong    | -0.98    | 0.02      | -64.11    | scale       |
|                       | Strong Very strong | 1.03     | 0.02      | 66.41     | scale       |
|                       | Yes                | 0.19     | 0.02      | 8.16      | coefficient |
|                       | No influence Weak  | -5.50    | 0.10      | -55.95    | scale       |
|                       | Weak Moderate      | -3.09    | 0.03      | -97.73    | scale       |
| cognitive_health      | Moderate Strong    | -0.87    | 0.02      | -54.33    | scale       |
|                       | Strong Very strong | 1.14     | 0.02      | 68.65     | scale       |
|                       | Below average      | -0.19    | 0.05      | -3.84     | coefficient |
|                       | No influence Weak  | -5.58    | 0.10      | -56.80    | scale       |
| mental_health         | Weak Moderate      | -3.17    | 0.03      | -103.33   | scale       |
|                       | Moderate Strong    | -0.95    | 0.01      | -68.97    | scale       |
|                       | Strong Very strong | 1.06     | 0.01      | 75.12     | scale       |
|                       | Below average      | -0.07    | 0.03      | -2.05     | coefficient |
|                       | No influence Weak  | -5.58    | 0.10      | -56.74    | scale       |
|                       | Weak Moderate      | -3.16    | 0.03      | -102.66   | scale       |
|                       | Moderate Strong    | -0.95    | 0.01      | -66.89    | scale       |
|                       | Strong Very strong | 1.06     | 0.01      | 73.20     | scale       |
|                       | Yes                | 0.13     | 0.02      | 5.86      | coefficient |
|                       | No influence Weak  | -5.52    | 0.10      | -56.02    | scale       |
|                       | Weak Moderate      | -3.10    | 0.03      | -97.87    | scale       |
|                       | Moderate Strong    | -0.88    | 0.02      | -54.73    | scale       |

*(continued)*

| illness_experience           | term               | estimate | std.error | statistic | coef.type   |
|------------------------------|--------------------|----------|-----------|-----------|-------------|
|                              | Strong Very strong | 1.12     | 0.02      | 66.99     | scale       |
|                              | Yes                | 0.04     | 0.02      | 1.69      | coefficient |
|                              | No influence Weak  | -5.55    | 0.10      | -56.22    | scale       |
| brain_disease_caregiver      | Weak Moderate      | -3.14    | 0.03      | -97.48    | scale       |
|                              | Moderate Strong    | -0.92    | 0.02      | -54.10    | scale       |
|                              | Strong Very strong | 1.09     | 0.02      | 62.46     | scale       |
|                              | Yes                | 0.02     | 0.02      | 0.76      | coefficient |
|                              | No influence Weak  | -5.56    | 0.10      | -56.36    | scale       |
| brain_research_participation | Weak Moderate      | -3.15    | 0.03      | -98.37    | scale       |
|                              | Moderate Strong    | -0.93    | 0.02      | -55.96    | scale       |
|                              | Strong Very strong | 1.08     | 0.02      | 63.41     | scale       |
|                              | Stable             | -0.08    | 0.02      | -3.71     | coefficient |
|                              | No influence Weak  | -5.62    | 0.10      | -56.73    | scale       |
| relationship                 | Weak Moderate      | -3.20    | 0.03      | -96.71    | scale       |
|                              | Moderate Strong    | -0.98    | 0.02      | -53.00    | scale       |
|                              | Strong Very strong | 1.02     | 0.02      | 54.83     | scale       |

## 1.3.8 Question 1: ordinal - Diet

| fct                   | term               | estimate | std.error | statistic | coef.type   |
|-----------------------|--------------------|----------|-----------|-----------|-------------|
| age                   | 41-60              | 0.42     | 0.02      | 17.02     | coefficient |
|                       | <= 40              | 0.53     | 0.03      | 16.22     | coefficient |
|                       | No influence Weak  | -4.61    | 0.07      | -66.74    | scale       |
|                       | Weak Moderate      | -2.84    | 0.03      | -91.06    | scale       |
|                       | Moderate Strong    | -0.69    | 0.02      | -38.82    | scale       |
|                       | Strong Very strong | 1.45     | 0.02      | 73.97     | scale       |
| education             | Lower              | -0.24    | 0.02      | -9.83     | coefficient |
|                       | No influence Weak  | -4.91    | 0.07      | -71.39    | scale       |
|                       | Weak Moderate      | -3.15    | 0.03      | -103.15   | scale       |
|                       | Moderate Strong    | -1.00    | 0.02      | -64.10    | scale       |
|                       | Strong Very strong | 1.12     | 0.02      | 69.89     | scale       |
| gender                | Man                | -0.30    | 0.03      | -12.07    | coefficient |
|                       | Other/Undisclosed  | 0.10     | 0.17      | 0.60      | coefficient |
|                       | No influence Weak  | -4.93    | 0.07      | -71.62    | scale       |
|                       | Weak Moderate      | -3.16    | 0.03      | -103.75   | scale       |
|                       | Moderate Strong    | -1.01    | 0.02      | -65.61    | scale       |
| healthcare_experience | Strong Very strong | 1.11     | 0.02      | 70.49     | scale       |
|                       | Yes                | 0.33     | 0.02      | 14.24     | coefficient |
|                       | No influence Weak  | -4.72    | 0.07      | -68.63    | scale       |
|                       | Weak Moderate      | -2.95    | 0.03      | -97.17    | scale       |
|                       | Moderate Strong    | -0.80    | 0.02      | -50.56    | scale       |
| cognitive_health      | Strong Very strong | 1.32     | 0.02      | 76.48     | scale       |
|                       | Below average      | -0.39    | 0.05      | -8.06     | coefficient |
|                       | No influence Weak  | -4.86    | 0.07      | -71.06    | scale       |
|                       | Weak Moderate      | -3.10    | 0.03      | -104.69   | scale       |
|                       | Moderate Strong    | -0.95    | 0.01      | -68.82    | scale       |
| mental_health         | Strong Very strong | 1.17     | 0.01      | 80.55     | scale       |
|                       | Below average      | -0.20    | 0.03      | -5.93     | coefficient |
|                       | No influence Weak  | -4.86    | 0.07      | -70.99    | scale       |
|                       | Weak Moderate      | -3.10    | 0.03      | -104.07   | scale       |
|                       | Moderate Strong    | -0.95    | 0.01      | -67.03    | scale       |
|                       | Strong Very strong | 1.16     | 0.01      | 78.30     | scale       |
|                       | Yes                | -0.10    | 0.02      | -4.22     | coefficient |
|                       | No influence Weak  | -4.87    | 0.07      | -70.65    | scale       |
|                       | Weak Moderate      | -3.11    | 0.03      | -100.68   | scale       |
|                       | Moderate Strong    | -0.96    | 0.02      | -58.79    | scale       |

*(continued)*

| illness_experience           | term               | estimate | std.error | statistic | coef.type   |
|------------------------------|--------------------|----------|-----------|-----------|-------------|
|                              | Strong Very strong | 1.15     | 0.02      | 68.03     | scale       |
|                              | Yes                | 0.16     | 0.02      | 6.95      | coefficient |
|                              | No influence Weak  | -4.76    | 0.07      | -69.00    | scale       |
| brain_disease_caregiver      | Weak Moderate      | -3.00    | 0.03      | -96.71    | scale       |
|                              | Moderate Strong    | -0.85    | 0.02      | -50.28    | scale       |
|                              | Strong Very strong | 1.26     | 0.02      | 70.21     | scale       |
|                              | Yes                | 0.05     | 0.02      | 1.99      | coefficient |
|                              | No influence Weak  | -4.81    | 0.07      | -69.79    | scale       |
| brain_research_participation | Weak Moderate      | -3.05    | 0.03      | -98.69    | scale       |
|                              | Moderate Strong    | -0.90    | 0.02      | -54.50    | scale       |
|                              | Strong Very strong | 1.21     | 0.02      | 69.39     | scale       |
|                              | Stable             | -0.07    | 0.02      | -2.98     | coefficient |
|                              | No influence Weak  | -4.87    | 0.07      | -70.07    | scale       |
| relationship                 | Weak Moderate      | -3.11    | 0.03      | -96.85    | scale       |
|                              | Moderate Strong    | -0.96    | 0.02      | -51.70    | scale       |
|                              | Strong Very strong | 1.15     | 0.02      | 60.37     | scale       |

## 1.3.9 Question 1: ordinal - Education

| fct                   | term               | estimate | std.error | statistic | coef.type   |
|-----------------------|--------------------|----------|-----------|-----------|-------------|
| age                   | 41-60              | -0.04    | 0.02      | -1.78     | coefficient |
|                       | <= 40              | 0.23     | 0.03      | 7.05      | coefficient |
|                       | No influence Weak  | -4.09    | 0.05      | -83.03    | scale       |
|                       | Weak Moderate      | -2.40    | 0.03      | -95.97    | scale       |
|                       | Moderate Strong    | -0.41    | 0.02      | -24.25    | scale       |
|                       | Strong Very strong | 1.57     | 0.02      | 78.90     | scale       |
| education             | Lower              | -0.49    | 0.02      | -20.39    | coefficient |
|                       | No influence Weak  | -4.29    | 0.05      | -87.97    | scale       |
|                       | Weak Moderate      | -2.59    | 0.02      | -108.65   | scale       |
|                       | Moderate Strong    | -0.59    | 0.01      | -40.19    | scale       |
|                       | Strong Very strong | 1.41     | 0.02      | 82.11     | scale       |
| gender                | Man                | 0.10     | 0.02      | 3.93      | coefficient |
|                       | Other/Undisclosed  | 0.15     | 0.17      | 0.89      | coefficient |
|                       | No influence Weak  | -4.08    | 0.05      | -84.51    | scale       |
|                       | Weak Moderate      | -2.39    | 0.02      | -103.91   | scale       |
|                       | Moderate Strong    | -0.41    | 0.01      | -28.67    | scale       |
| healthcare_experience | Strong Very strong | 1.57     | 0.02      | 90.20     | scale       |
|                       | Yes                | 0.30     | 0.02      | 13.12     | coefficient |
|                       | No influence Weak  | -4.00    | 0.05      | -82.60    | scale       |
|                       | Weak Moderate      | -2.31    | 0.02      | -98.63    | scale       |
|                       | Moderate Strong    | -0.32    | 0.02      | -21.11    | scale       |
| cognitive_health      | Strong Very strong | 1.67     | 0.02      | 89.89     | scale       |
|                       | Below average      | -0.41    | 0.05      | -8.71     | coefficient |
|                       | No influence Weak  | -4.14    | 0.05      | -86.28    | scale       |
|                       | Weak Moderate      | -2.45    | 0.02      | -109.73   | scale       |
|                       | Moderate Strong    | -0.46    | 0.01      | -36.06    | scale       |
| mental_health         | Strong Very strong | 1.52     | 0.02      | 95.08     | scale       |
|                       | Below average      | -0.32    | 0.03      | -9.56     | coefficient |
|                       | No influence Weak  | -4.15    | 0.05      | -86.38    | scale       |
|                       | Weak Moderate      | -2.46    | 0.02      | -109.02   | scale       |
|                       | Moderate Strong    | -0.47    | 0.01      | -36.15    | scale       |
|                       | Strong Very strong | 1.51     | 0.02      | 92.50     | scale       |
|                       | Yes                | -0.10    | 0.02      | -4.43     | coefficient |
|                       | No influence Weak  | -4.15    | 0.05      | -85.13    | scale       |
|                       | Weak Moderate      | -2.46    | 0.02      | -102.68   | scale       |
|                       | Moderate Strong    | -0.47    | 0.02      | -30.73    | scale       |

*(continued)*

| illness_experience           | term               | estimate | std.error | statistic | coef.type   |
|------------------------------|--------------------|----------|-----------|-----------|-------------|
|                              | Strong Very strong | 1.51     | 0.02      | 82.88     | scale       |
|                              | Yes                | -0.10    | 0.02      | -4.28     | coefficient |
|                              | No influence Weak  | -4.15    | 0.05      | -84.76    | scale       |
| brain_disease_caregiver      | Weak Moderate      | -2.46    | 0.02      | -100.62   | scale       |
|                              | Moderate Strong    | -0.48    | 0.02      | -29.47    | scale       |
|                              | Strong Very strong | 1.50     | 0.02      | 79.77     | scale       |
|                              | Yes                | -0.02    | 0.02      | -1.10     | coefficient |
|                              | No influence Weak  | -4.12    | 0.05      | -84.39    | scale       |
| brain_research_participation | Weak Moderate      | -2.43    | 0.02      | -100.84   | scale       |
|                              | Moderate Strong    | -0.44    | 0.02      | -28.23    | scale       |
|                              | Strong Very strong | 1.54     | 0.02      | 82.74     | scale       |
|                              | Stable             | 0.00     | 0.02      | -0.16     | coefficient |
|                              | No influence Weak  | -4.11    | 0.05      | -83.15    | scale       |
| relationship                 | Weak Moderate      | -2.42    | 0.03      | -95.48    | scale       |
|                              | Moderate Strong    | -0.44    | 0.02      | -24.64    | scale       |
|                              | Strong Very strong | 1.54     | 0.02      | 76.24     | scale       |

## 1.3.10 Question 1: ordinal - Profession

| fct                   | term               | estimate | std.error | statistic | coef.type   |
|-----------------------|--------------------|----------|-----------|-----------|-------------|
| age                   | 41-60              | 0.17     | 0.02      | 7.01      | coefficient |
|                       | <= 40              | 0.38     | 0.03      | 11.75     | coefficient |
|                       | No influence Weak  | -3.75    | 0.04      | -85.03    | scale       |
|                       | Weak Moderate      | -2.17    | 0.02      | -91.21    | scale       |
|                       | Moderate Strong    | -0.11    | 0.02      | -6.35     | scale       |
|                       | Strong Very strong | 2.04     | 0.02      | 92.50     | scale       |
| education             | Lower              | -0.30    | 0.02      | -12.53    | coefficient |
|                       | No influence Weak  | -3.97    | 0.04      | -91.30    | scale       |
|                       | Weak Moderate      | -2.39    | 0.02      | -106.10   | scale       |
|                       | Moderate Strong    | -0.33    | 0.01      | -22.77    | scale       |
|                       | Strong Very strong | 1.82     | 0.02      | 94.52     | scale       |
| gender                | Man                | 0.14     | 0.02      | 5.56      | coefficient |
|                       | Other/Undisclosed  | 0.00     | 0.17      | 0.01      | coefficient |
|                       | No influence Weak  | -3.83    | 0.04      | -88.77    | scale       |
|                       | Weak Moderate      | -2.25    | 0.02      | -102.78   | scale       |
|                       | Moderate Strong    | -0.19    | 0.01      | -13.84    | scale       |
| healthcare_experience | Strong Very strong | 1.94     | 0.02      | 99.89     | scale       |
|                       | Yes                | 0.22     | 0.02      | 9.65      | coefficient |
|                       | No influence Weak  | -3.79    | 0.04      | -87.28    | scale       |
|                       | Weak Moderate      | -2.20    | 0.02      | -98.33    | scale       |
|                       | Moderate Strong    | -0.15    | 0.02      | -9.79     | scale       |
| cognitive_health      | Strong Very strong | 1.99     | 0.02      | 98.03     | scale       |
|                       | Below average      | -0.24    | 0.05      | -5.08     | coefficient |
|                       | No influence Weak  | -3.89    | 0.04      | -90.82    | scale       |
|                       | Weak Moderate      | -2.30    | 0.02      | -109.13   | scale       |
|                       | Moderate Strong    | -0.25    | 0.01      | -19.75    | scale       |
| mental_health         | Strong Very strong | 1.89     | 0.02      | 104.23    | scale       |
|                       | Below average      | -0.10    | 0.03      | -3.13     | coefficient |
|                       | No influence Weak  | -3.88    | 0.04      | -90.52    | scale       |
|                       | Weak Moderate      | -2.30    | 0.02      | -107.74   | scale       |
|                       | Moderate Strong    | -0.25    | 0.01      | -19.05    | scale       |
|                       | Strong Very strong | 1.89     | 0.02      | 102.62    | scale       |
|                       | Yes                | -0.05    | 0.02      | -2.17     | coefficient |
|                       | No influence Weak  | -3.89    | 0.04      | -89.08    | scale       |
|                       | Weak Moderate      | -2.31    | 0.02      | -101.00   | scale       |
|                       | Moderate Strong    | -0.25    | 0.02      | -16.56    | scale       |

*(continued)*

| illness_experience           | term               | estimate | std.error | statistic | coef.type   |
|------------------------------|--------------------|----------|-----------|-----------|-------------|
|                              | Strong Very strong | 1.88     | 0.02      | 93.76     | scale       |
|                              | Yes                | -0.13    | 0.02      | -6.01     | coefficient |
|                              | No influence Weak  | -3.93    | 0.04      | -89.36    | scale       |
| brain_disease_caregiver      | Weak Moderate      | -2.35    | 0.02      | -100.01   | scale       |
|                              | Moderate Strong    | -0.30    | 0.02      | -18.37    | scale       |
|                              | Strong Very strong | 1.84     | 0.02      | 89.51     | scale       |
|                              | Yes                | -0.15    | 0.02      | -6.56     | coefficient |
|                              | No influence Weak  | -3.94    | 0.04      | -89.70    | scale       |
| brain_research_participation | Weak Moderate      | -2.35    | 0.02      | -101.27   | scale       |
|                              | Moderate Strong    | -0.30    | 0.02      | -18.97    | scale       |
|                              | Strong Very strong | 1.84     | 0.02      | 91.00     | scale       |
|                              | Stable             | -0.05    | 0.02      | -2.04     | coefficient |
|                              | No influence Weak  | -3.90    | 0.04      | -87.51    | scale       |
| relationship                 | Weak Moderate      | -2.31    | 0.02      | -94.65    | scale       |
|                              | Moderate Strong    | -0.26    | 0.02      | -14.70    | scale       |
|                              | Strong Very strong | 1.88     | 0.02      | 85.81     | scale       |



## 1.3.11 Question 1: ordinal - Income

| fct                   | term               | estimate | std.error | statistic | coef.type   |
|-----------------------|--------------------|----------|-----------|-----------|-------------|
| age                   | 41-60              | -0.04    | 0.02      | -1.51     | coefficient |
|                       | <= 40              | -0.28    | 0.03      | -8.55     | coefficient |
|                       | No influence Weak  | -3.26    | 0.03      | -97.38    | scale       |
|                       | Weak Moderate      | -1.47    | 0.02      | -75.43    | scale       |
|                       | Moderate Strong    | 0.53     | 0.02      | 30.57     | scale       |
|                       | Strong Very strong | 2.67     | 0.03      | 96.51     | scale       |
| education             | Lower              | 0.09     | 0.02      | 3.53      | coefficient |
|                       | No influence Weak  | -3.17    | 0.03      | -99.43    | scale       |
|                       | Weak Moderate      | -1.38    | 0.02      | -82.25    | scale       |
|                       | Moderate Strong    | 0.61     | 0.01      | 41.51     | scale       |
|                       | Strong Very strong | 2.75     | 0.03      | 104.64    | scale       |
| gender                | Man                | -0.12    | 0.02      | -4.63     | coefficient |
|                       | Other/Undisclosed  | 0.18     | 0.17      | 1.02      | coefficient |
|                       | No influence Weak  | -3.23    | 0.03      | -101.07   | scale       |
|                       | Weak Moderate      | -1.44    | 0.02      | -85.65    | scale       |
|                       | Moderate Strong    | 0.55     | 0.01      | 38.47     | scale       |
| healthcare_experience | Strong Very strong | 2.69     | 0.03      | 103.57    | scale       |
|                       | Yes                | 0.29     | 0.02      | 12.48     | coefficient |
|                       | No influence Weak  | -3.09    | 0.03      | -96.53    | scale       |
|                       | Weak Moderate      | -1.31    | 0.02      | -75.46    | scale       |
|                       | Moderate Strong    | 0.70     | 0.02      | 44.57     | scale       |
| cognitive_health      | Strong Very strong | 2.84     | 0.03      | 105.35    | scale       |
|                       | Below average      | -0.10    | 0.05      | -2.11     | coefficient |
|                       | No influence Weak  | -3.20    | 0.03      | -102.60   | scale       |
|                       | Weak Moderate      | -1.42    | 0.02      | -91.57    | scale       |
|                       | Moderate Strong    | 0.58     | 0.01      | 44.84     | scale       |
| mental_health         | Strong Very strong | 2.72     | 0.03      | 107.62    | scale       |
|                       | Below average      | -0.06    | 0.03      | -1.68     | coefficient |
|                       | No influence Weak  | -3.20    | 0.03      | -102.06   | scale       |
|                       | Weak Moderate      | -1.42    | 0.02      | -89.62    | scale       |
|                       | Moderate Strong    | 0.58     | 0.01      | 43.36     | scale       |
|                       | Strong Very strong | 2.72     | 0.03      | 106.69    | scale       |
|                       | Yes                | 0.12     | 0.02      | 5.38      | coefficient |
|                       | No influence Weak  | -3.15    | 0.03      | -97.61    | scale       |
|                       | Weak Moderate      | -1.36    | 0.02      | -77.60    | scale       |
|                       | Moderate Strong    | 0.63     | 0.02      | 40.48     | scale       |

*(continued)*

| fct                          | term               | estimate | std.error | statistic | coef.type   |
|------------------------------|--------------------|----------|-----------|-----------|-------------|
| illness_experience           | Strong Very strong | 2.77     | 0.03      | 103.25    | scale       |
|                              | Yes                | 0.04     | 0.02      | 1.64      | coefficient |
|                              | No influence Weak  | -3.18    | 0.03      | -97.19    | scale       |
| brain_disease_caregiver      | Weak Moderate      | -1.39    | 0.02      | -75.89    | scale       |
|                              | Moderate Strong    | 0.60     | 0.02      | 36.65     | scale       |
|                              | Strong Very strong | 2.74     | 0.03      | 100.66    | scale       |
| brain_research_participation | Yes                | 0.05     | 0.02      | 2.08      | coefficient |
|                              | No influence Weak  | -3.18    | 0.03      | -97.71    | scale       |
|                              | Weak Moderate      | -1.39    | 0.02      | -77.24    | scale       |
| relationship                 | Moderate Strong    | 0.60     | 0.02      | 37.77     | scale       |
|                              | Strong Very strong | 2.74     | 0.03      | 101.65    | scale       |
|                              | Stable             | 0.00     | 0.02      | 0.11      | coefficient |
|                              | No influence Weak  | -3.19    | 0.03      | -95.36    | scale       |
|                              | Weak Moderate      | -1.41    | 0.02      | -71.44    | scale       |
|                              | Moderate Strong    | 0.58     | 0.02      | 32.81     | scale       |
|                              | Strong Very strong | 2.72     | 0.03      | 97.03     | scale       |

## 1.4 Comparison binary and continuous model results

### 1.4.1 Question 1: bin\_vs\_cont - Substance use

| fct                          | Binary |          |           |           |         | Continuous |       |           |           |         |
|------------------------------|--------|----------|-----------|-----------|---------|------------|-------|-----------|-----------|---------|
|                              | term   | log_odds | std.error | statistic | p.value | term       | beta  | std.error | statistic | p.value |
| brain_research_participation | Yes    | 0        | 0.05      | 0.09      | 0.93    | Yes        | -0.02 | 0.01      | -2        | 0.05    |

### 1.4.2 Question 1: bin\_vs\_cont - Sleeping habits

| fct              | Binary        |          |           |           |         | Continuous    |      |           |           |         |
|------------------|---------------|----------|-----------|-----------|---------|---------------|------|-----------|-----------|---------|
|                  | term          | log_odds | std.error | statistic | p.value | term          | beta | std.error | statistic | p.value |
| cognitive_health | Below average | -0.08    | 0.07      | -1.21     | 0.23    | Below average | 0.02 | 0.02      | 1.28      | 0.2     |

### 1.4.3 Question 1: bin\_vs\_cont - Life goals

| fct          | Binary |          |           |           |         | Continuous |       |           |           |         |
|--------------|--------|----------|-----------|-----------|---------|------------|-------|-----------|-----------|---------|
|              | term   | log_odds | std.error | statistic | p.value | term       | beta  | std.error | statistic | p.value |
| age          | 41-60  | -0.05    | 0.03      | -1.73     | 0.08    | 41-60      | 0.01  | 0.01      | 0.49      | 0.62    |
| relationship | Stable | 0.01     | 0.03      | 0.45      | 0.65    | Stable     | -0.01 | 0.01      | -0.93     | 0.35    |

## 1.4.4 Question 1: bin\_vs\_cont - Diet

| fct    | Binary            |          |           |           |         | Continuous        |      |           |           |         |
|--------|-------------------|----------|-----------|-----------|---------|-------------------|------|-----------|-----------|---------|
|        | term              | log_odds | std.error | statistic | p.value | term              | beta | std.error | statistic | p.value |
| gender | Other/Undisclosed | -0.06    | 0.2       | -0.32     | 0.75    | Other/Undisclosed | 0.05 | 0.07      | 0.65      | 0.51    |

## 1.4.5 Question 1: bin\_vs\_cont - Education

| fct          | Binary |          |           |           |         | Continuous |      |           |           |         |
|--------------|--------|----------|-----------|-----------|---------|------------|------|-----------|-----------|---------|
|              | term   | log_odds | std.error | statistic | p.value | term       | beta | std.error | statistic | p.value |
| relationship | Stable | 0.03     | 0.02      | 1.03      | 0.3     | Stable     | 0    | 0.01      | -0.14     | 0.89    |

## 1.4.6 Question 1: bin\_vs\_cont - Income

| fct              | Binary        |          |           |           |         | Continuous    |       |           |           |         |
|------------------|---------------|----------|-----------|-----------|---------|---------------|-------|-----------|-----------|---------|
|                  | term          | log_odds | std.error | statistic | p.value | term          | beta  | std.error | statistic | p.value |
| cognitive_health | Below average | 0.04     | 0.05      | 0.74      | 0.46    | Below average | -0.06 | 0.02      | -2.64     | 0.01    |
| mental_health    | Below average | 0.00     | 0.04      | 0.07      | 0.94    | Below average | -0.03 | 0.02      | -1.74     | 0.08    |
| relationship     | Stable        | 0.00     | 0.03      | -0.05     | 0.96    | Stable        | 0.00  | 0.01      | 0.09      | 0.93    |

## 2 Question 2

### 2.1 Continuous models

For peer review only

## 2.1.1 Question 2: continuous - In the womb

| fct                          | term              | estimate | std.error | statistic | p.value |
|------------------------------|-------------------|----------|-----------|-----------|---------|
|                              | (Intercept)       | 3.25     | 0.01      | 424.60    | 0.00    |
| age                          | 41-60             | 0.17     | 0.01      | 14.54     | 0.00    |
|                              | <= 40             | 0.18     | 0.01      | 12.24     | 0.00    |
| education                    | (Intercept)       | 3.41     | 0.01      | 546.44    | 0.00    |
|                              | Lower             | -0.22    | 0.01      | -19.76    | 0.00    |
| gender                       | (Intercept)       | 3.40     | 0.01      | 554.77    | 0.00    |
|                              | Man               | -0.22    | 0.01      | -18.76    | 0.00    |
|                              | Other/Undisclosed | 0.03     | 0.08      | 0.33      | 0.74    |
| healthcare_experience        | (Intercept)       | 3.25     | 0.01      | 492.92    | 0.00    |
|                              | Yes               | 0.24     | 0.01      | 22.48     | 0.00    |
| cognitive_health             | (Intercept)       | 3.35     | 0.01      | 624.96    | 0.00    |
|                              | Below average     | -0.20    | 0.02      | -9.35     | 0.00    |
| mental_health                | (Intercept)       | 3.34     | 0.01      | 597.91    | 0.00    |
|                              | Below average     | -0.02    | 0.02      | -1.30     | 0.19    |
| illness_experience           | (Intercept)       | 3.34     | 0.01      | 495.49    | 0.00    |
|                              | Yes               | 0.00     | 0.01      | -0.20     | 0.84    |
| brain_disease_caregiver      | (Intercept)       | 3.30     | 0.01      | 464.18    | 0.00    |
|                              | Yes               | 0.08     | 0.01      | 7.59      | 0.00    |
| brain_research_participation | (Intercept)       | 3.34     | 0.01      | 482.93    | 0.00    |
|                              | Yes               | 0.00     | 0.01      | 0.42      | 0.67    |
| relationship                 | (Intercept)       | 3.33     | 0.01      | 424.85    | 0.00    |
|                              | Stable            | 0.01     | 0.01      | 1.40      | 0.16    |

## 2.1.2 Question 2: continuous - Childhood

| fct                          | term              | estimate | std.error | statistic | p.value |
|------------------------------|-------------------|----------|-----------|-----------|---------|
|                              | (Intercept)       | 3.59     | 0.01      | 685.25    | 0.00    |
| age                          | 41-60             | 0.12     | 0.01      | 15.09     | 0.00    |
|                              | <= 40             | 0.18     | 0.01      | 17.75     | 0.00    |
| education                    | (Intercept)       | 3.70     | 0.00      | 859.50    | 0.00    |
|                              | Lower             | -0.11    | 0.01      | -14.84    | 0.00    |
| gender                       | (Intercept)       | 3.69     | 0.00      | 871.25    | 0.00    |
|                              | Man               | -0.09    | 0.01      | -11.39    | 0.00    |
|                              | Other/Undisclosed | 0.04     | 0.05      | 0.80      | 0.42    |
| healthcare_experience        | (Intercept)       | 3.62     | 0.00      | 795.47    | 0.00    |
|                              | Yes               | 0.11     | 0.01      | 15.41     | 0.00    |
| cognitive_health             | (Intercept)       | 3.67     | 0.00      | 994.69    | 0.00    |
|                              | Below average     | -0.12    | 0.02      | -7.83     | 0.00    |
| mental_health                | (Intercept)       | 3.66     | 0.00      | 952.42    | 0.00    |
|                              | Below average     | 0.02     | 0.01      | 2.17      | 0.03    |
| illness_experience           | (Intercept)       | 3.66     | 0.00      | 790.22    | 0.00    |
|                              | Yes               | 0.00     | 0.01      | -0.36     | 0.72    |
| brain_disease_caregiver      | (Intercept)       | 3.66     | 0.00      | 748.43    | 0.00    |
|                              | Yes               | 0.00     | 0.01      | -0.41     | 0.68    |
| brain_research_participation | (Intercept)       | 3.67     | 0.00      | 772.67    | 0.00    |
|                              | Yes               | -0.02    | 0.01      | -2.64     | 0.01    |
| relationship                 | (Intercept)       | 3.67     | 0.01      | 681.02    | 0.00    |
|                              | Stable            | -0.02    | 0.01      | -2.31     | 0.02    |

## 2.1.3 Question 2: continuous - Adolescence

| fct                          | term              | estimate | std.error | statistic | p.value |
|------------------------------|-------------------|----------|-----------|-----------|---------|
|                              | (Intercept)       | 3.60     | 0.00      | 739.48    | 0.00    |
| age                          | 41-60             | 0.10     | 0.01      | 13.91     | 0.00    |
|                              | <= 40             | 0.16     | 0.01      | 16.49     | 0.00    |
| education                    | (Intercept)       | 3.68     | 0.00      | 919.07    | 0.00    |
|                              | Lower             | -0.06    | 0.01      | -9.00     | 0.00    |
| gender                       | (Intercept)       | 3.69     | 0.00      | 938.03    | 0.00    |
|                              | Man               | -0.09    | 0.01      | -12.11    | 0.00    |
|                              | Other/Undisclosed | 0.05     | 0.05      | 0.94      | 0.35    |
| healthcare_experience        | (Intercept)       | 3.63     | 0.00      | 857.58    | 0.00    |
|                              | Yes               | 0.09     | 0.01      | 13.28     | 0.00    |
| cognitive_health             | (Intercept)       | 3.67     | 0.00      | 1070.09   | 0.00    |
|                              | Below average     | -0.09    | 0.01      | -6.42     | 0.00    |
| mental_health                | (Intercept)       | 3.66     | 0.00      | 1025.39   | 0.00    |
|                              | Below average     | 0.02     | 0.01      | 2.32      | 0.02    |
| illness_experience           | (Intercept)       | 3.66     | 0.00      | 849.83    | 0.00    |
|                              | Yes               | 0.01     | 0.01      | 1.19      | 0.24    |
| brain_disease_caregiver      | (Intercept)       | 3.66     | 0.00      | 805.15    | 0.00    |
|                              | Yes               | 0.00     | 0.01      | 0.66      | 0.51    |
| brain_research_participation | (Intercept)       | 3.66     | 0.00      | 829.97    | 0.00    |
|                              | Yes               | 0.00     | 0.01      | 0.09      | 0.93    |
| relationship                 | (Intercept)       | 3.68     | 0.01      | 734.28    | 0.00    |
|                              | Stable            | -0.03    | 0.01      | -3.75     | 0.00    |

## 2.1.4 Question 2: continuous - Young adulthood

| fct                          | term              | estimate | std.error | statistic | p.value |
|------------------------------|-------------------|----------|-----------|-----------|---------|
|                              | (Intercept)       | 3.51     | 0.01      | 670.76    | 0.00    |
| age                          | 41-60             | 0.07     | 0.01      | 9.61      | 0.00    |
|                              | <= 40             | 0.07     | 0.01      | 7.29      | 0.00    |
| education                    | (Intercept)       | 3.55     | 0.00      | 827.66    | 0.00    |
|                              | Lower             | -0.01    | 0.01      | -1.85     | 0.06    |
| gender                       | (Intercept)       | 3.58     | 0.00      | 853.74    | 0.00    |
|                              | Man               | -0.12    | 0.01      | -15.84    | 0.00    |
|                              | Other/Undisclosed | -0.05    | 0.05      | -1.03     | 0.30    |
| healthcare_experience        | (Intercept)       | 3.51     | 0.00      | 775.81    | 0.00    |
|                              | Yes               | 0.09     | 0.01      | 12.85     | 0.00    |
| cognitive_health             | (Intercept)       | 3.55     | 0.00      | 968.01    | 0.00    |
|                              | Below average     | -0.05    | 0.01      | -3.67     | 0.00    |
| mental_health                | (Intercept)       | 3.55     | 0.00      | 929.45    | 0.00    |
|                              | Below average     | -0.01    | 0.01      | -0.63     | 0.53    |
| illness_experience           | (Intercept)       | 3.53     | 0.00      | 767.77    | 0.00    |
|                              | Yes               | 0.03     | 0.01      | 4.43      | 0.00    |
| brain_disease_caregiver      | (Intercept)       | 3.52     | 0.00      | 725.02    | 0.00    |
|                              | Yes               | 0.05     | 0.01      | 7.39      | 0.00    |
| brain_research_participation | (Intercept)       | 3.54     | 0.00      | 749.48    | 0.00    |
|                              | Yes               | 0.02     | 0.01      | 2.78      | 0.01    |
| relationship                 | (Intercept)       | 3.55     | 0.01      | 662.83    | 0.00    |
|                              | Stable            | 0.00     | 0.01      | -0.67     | 0.51    |



## 2.1.5 Question 2: continuous - Middle age

| fct                          | term              | estimate | std.error | statistic | p.value |
|------------------------------|-------------------|----------|-----------|-----------|---------|
|                              | (Intercept)       | 3.56     | 0.01      | 700.08    | 0.00    |
| age                          | 41-60             | 0.10     | 0.01      | 12.88     | 0.00    |
|                              | <= 40             | -0.01    | 0.01      | -0.84     | 0.40    |
| education                    | (Intercept)       | 3.60     | 0.00      | 860.58    | 0.00    |
|                              | Lower             | -0.01    | 0.01      | -1.73     | 0.08    |
| gender                       | (Intercept)       | 3.65     | 0.00      | 893.54    | 0.00    |
|                              | Man               | -0.16    | 0.01      | -20.93    | 0.00    |
|                              | Other/Undisclosed | -0.17    | 0.05      | -3.23     | 0.00    |
| healthcare_experience        | (Intercept)       | 3.57     | 0.00      | 808.12    | 0.00    |
|                              | Yes               | 0.07     | 0.01      | 9.33      | 0.00    |
| cognitive_health             | (Intercept)       | 3.60     | 0.00      | 1006.69   | 0.00    |
|                              | Below average     | -0.05    | 0.01      | -3.65     | 0.00    |
| mental_health                | (Intercept)       | 3.60     | 0.00      | 967.35    | 0.00    |
|                              | Below average     | -0.02    | 0.01      | -2.40     | 0.02    |
| illness_experience           | (Intercept)       | 3.59     | 0.00      | 799.55    | 0.00    |
|                              | Yes               | 0.02     | 0.01      | 2.48      | 0.01    |
| brain_disease_caregiver      | (Intercept)       | 3.56     | 0.00      | 751.82    | 0.00    |
|                              | Yes               | 0.09     | 0.01      | 13.03     | 0.00    |
| brain_research_participation | (Intercept)       | 3.59     | 0.00      | 778.77    | 0.00    |
|                              | Yes               | 0.03     | 0.01      | 4.17      | 0.00    |
| relationship                 | (Intercept)       | 3.59     | 0.01      | 686.89    | 0.00    |
|                              | Stable            | 0.02     | 0.01      | 2.54      | 0.01    |

### 2.1.6 Question 2: continuous - Old age

| fct                          | term              | estimate | std.error | statistic | p.value |
|------------------------------|-------------------|----------|-----------|-----------|---------|
|                              | (Intercept)       | 3.69     | 0.00      | 745.06    | 0.00    |
| age                          | 41-60             | 0.01     | 0.01      | 1.40      | 0.16    |
|                              | <= 40             | -0.09    | 0.01      | -9.28     | 0.00    |
| education                    | (Intercept)       | 3.70     | 0.00      | 907.70    | 0.00    |
|                              | Lower             | -0.04    | 0.01      | -5.44     | 0.00    |
| gender                       | (Intercept)       | 3.72     | 0.00      | 933.78    | 0.00    |
|                              | Man               | -0.12    | 0.01      | -16.04    | 0.00    |
|                              | Other/Undisclosed | -0.17    | 0.05      | -3.32     | 0.00    |
| healthcare_experience        | (Intercept)       | 3.67     | 0.00      | 852.14    | 0.00    |
|                              | Yes               | 0.04     | 0.01      | 5.57      | 0.00    |
| cognitive_health             | (Intercept)       | 3.69     | 0.00      | 1059.06   | 0.00    |
|                              | Below average     | -0.05    | 0.01      | -3.63     | 0.00    |
| mental_health                | (Intercept)       | 3.69     | 0.00      | 1018.63   | 0.00    |
|                              | Below average     | -0.04    | 0.01      | -4.24     | 0.00    |
| illness_experience           | (Intercept)       | 3.68     | 0.00      | 841.89    | 0.00    |
|                              | Yes               | 0.01     | 0.01      | 1.63      | 0.10    |
| brain_disease_caregiver      | (Intercept)       | 3.65     | 0.00      | 792.71    | 0.00    |
|                              | Yes               | 0.06     | 0.01      | 9.54      | 0.00    |
| brain_research_participation | (Intercept)       | 3.66     | 0.00      | 818.20    | 0.00    |
|                              | Yes               | 0.05     | 0.01      | 6.83      | 0.00    |
| relationship                 | (Intercept)       | 3.67     | 0.01      | 722.10    | 0.00    |
|                              | Stable            | 0.02     | 0.01      | 3.53      | 0.00    |

## 2.2 Binary models

## 2.2.1 Question 2: binary - In the womb

| fct                          | term              | estimate | std.error | statistic | p.value |
|------------------------------|-------------------|----------|-----------|-----------|---------|
|                              | (Intercept)       | 1.43     | 0.02      | 63.24     | 0.00    |
| age                          | 41-60             | 0.40     | 0.04      | 10.94     | 0.00    |
|                              | <= 40             | 0.39     | 0.05      | 8.04      | 0.00    |
| education                    | (Intercept)       | 1.82     | 0.02      | 86.26     | 0.00    |
|                              | Lower             | -0.52    | 0.03      | -15.42    | 0.00    |
| gender                       | (Intercept)       | 1.81     | 0.02      | 87.70     | 0.00    |
|                              | Man               | -0.54    | 0.03      | -15.83    | 0.00    |
|                              | Other/Undisclosed | 0.04     | 0.26      | 0.15      | 0.88    |
| healthcare_experience        | (Intercept)       | 1.42     | 0.02      | 72.64     | 0.00    |
|                              | Yes               | 0.65     | 0.04      | 17.78     | 0.00    |
| cognitive_health             | (Intercept)       | 1.67     | 0.02      | 97.64     | 0.00    |
|                              | Below average     | -0.51    | 0.06      | -8.47     | 0.00    |
| mental_health                | (Intercept)       | 1.65     | 0.02      | 93.42     | 0.00    |
|                              | Below average     | -0.14    | 0.05      | -3.00     | 0.00    |
| illness_experience           | (Intercept)       | 1.64     | 0.02      | 77.25     | 0.00    |
|                              | Yes               | -0.02    | 0.03      | -0.65     | 0.52    |
| brain_disease_caregiver      | (Intercept)       | 1.53     | 0.02      | 70.58     | 0.00    |
|                              | Yes               | 0.24     | 0.03      | 7.35      | 0.00    |
| brain_research_participation | (Intercept)       | 1.65     | 0.02      | 75.48     | 0.00    |
|                              | Yes               | -0.03    | 0.03      | -1.05     | 0.29    |
| relationship                 | (Intercept)       | 1.60     | 0.02      | 65.62     | 0.00    |
|                              | Stable            | 0.06     | 0.03      | 1.88      | 0.06    |

## 2.2.2 Question 2: binary - Childhood

| fct                          | term              | estimate | std.error | statistic | p.value |
|------------------------------|-------------------|----------|-----------|-----------|---------|
|                              | (Intercept)       | 2.65     | 0.04      | 73.93     | 0.00    |
| age                          | 41-60             | 0.57     | 0.06      | 9.17      | 0.00    |
|                              | <= 40             | 0.64     | 0.09      | 7.26      | 0.00    |
| education                    | (Intercept)       | 3.13     | 0.04      | 86.00     | 0.00    |
|                              | Lower             | -0.56    | 0.06      | -9.99     | 0.00    |
| gender                       | (Intercept)       | 3.10     | 0.04      | 87.94     | 0.00    |
|                              | Man               | -0.52    | 0.06      | -9.23     | 0.00    |
|                              | Other/Undisclosed | -0.12    | 0.42      | -0.28     | 0.78    |
| healthcare_experience        | (Intercept)       | 2.70     | 0.03      | 85.08     | 0.00    |
|                              | Yes               | 0.72     | 0.06      | 11.26     | 0.00    |
| cognitive_health             | (Intercept)       | 2.97     | 0.03      | 102.68    | 0.00    |
|                              | Below average     | -0.58    | 0.09      | -6.21     | 0.00    |
| mental_health                | (Intercept)       | 2.93     | 0.03      | 99.12     | 0.00    |
|                              | Below average     | -0.04    | 0.08      | -0.46     | 0.65    |
| illness_experience           | (Intercept)       | 2.96     | 0.04      | 81.90     | 0.00    |
|                              | Yes               | -0.08    | 0.06      | -1.48     | 0.14    |
| brain_disease_caregiver      | (Intercept)       | 2.92     | 0.04      | 77.91     | 0.00    |
|                              | Yes               | 0.02     | 0.06      | 0.29      | 0.77    |
| brain_research_participation | (Intercept)       | 2.96     | 0.04      | 79.93     | 0.00    |
|                              | Yes               | -0.07    | 0.06      | -1.31     | 0.19    |
| relationship                 | (Intercept)       | 2.98     | 0.04      | 70.24     | 0.00    |
|                              | Stable            | -0.10    | 0.06      | -1.76     | 0.08    |

## 2.2.3 Question 2: binary - Adolescence

| fct                          | term              | estimate | std.error | statistic | p.value |
|------------------------------|-------------------|----------|-----------|-----------|---------|
|                              | (Intercept)       | 3.06     | 0.04      | 71.14     | 0.00    |
| age                          | 41-60             | 0.54     | 0.07      | 7.18      | 0.00    |
|                              | <= 40             | 0.76     | 0.11      | 6.79      | 0.00    |
| education                    | (Intercept)       | 3.49     | 0.04      | 81.21     | 0.00    |
|                              | Lower             | -0.40    | 0.07      | -5.93     | 0.00    |
| gender                       | (Intercept)       | 3.47     | 0.04      | 82.93     | 0.00    |
|                              | Man               | -0.39    | 0.07      | -5.59     | 0.00    |
|                              | Other/Undisclosed | -0.29    | 0.46      | -0.64     | 0.52    |
| healthcare_experience        | (Intercept)       | 3.15     | 0.04      | 81.08     | 0.00    |
|                              | Yes               | 0.58     | 0.08      | 7.74      | 0.00    |
| cognitive_health             | (Intercept)       | 3.40     | 0.04      | 96.48     | 0.00    |
|                              | Below average     | -0.69    | 0.11      | -6.44     | 0.00    |
| mental_health                | (Intercept)       | 3.36     | 0.04      | 93.38     | 0.00    |
|                              | Below average     | -0.11    | 0.09      | -1.16     | 0.25    |
| illness_experience           | (Intercept)       | 3.35     | 0.04      | 77.56     | 0.00    |
|                              | Yes               | -0.01    | 0.07      | -0.12     | 0.91    |
| brain_disease_caregiver      | (Intercept)       | 3.34     | 0.05      | 73.49     | 0.00    |
|                              | Yes               | 0.00     | 0.07      | -0.02     | 0.98    |
| brain_research_participation | (Intercept)       | 3.36     | 0.04      | 75.48     | 0.00    |
|                              | Yes               | -0.05    | 0.07      | -0.68     | 0.50    |
| relationship                 | (Intercept)       | 3.42     | 0.05      | 65.86     | 0.00    |
|                              | Stable            | -0.13    | 0.07      | -1.96     | 0.05    |

## 2.2.4 Question 2: binary - Young adulthood

| fct                          | term              | estimate | std.error | statistic | p.value |
|------------------------------|-------------------|----------|-----------|-----------|---------|
|                              | (Intercept)       | 2.85     | 0.04      | 72.82     | 0.00    |
| age                          | 41-60             | 0.46     | 0.07      | 6.98      | 0.00    |
|                              | <= 40             | 0.19     | 0.08      | 2.35      | 0.02    |
| education                    | (Intercept)       | 3.02     | 0.03      | 87.28     | 0.00    |
|                              | Lower             | 0.05     | 0.06      | 0.86      | 0.39    |
| gender                       | (Intercept)       | 3.24     | 0.04      | 86.19     | 0.00    |
|                              | Man               | -0.58    | 0.06      | -9.85     | 0.00    |
|                              | Other/Undisclosed | -0.68    | 0.35      | -1.96     | 0.05    |
| healthcare_experience        | (Intercept)       | 2.88     | 0.03      | 83.82     | 0.00    |
|                              | Yes               | 0.47     | 0.06      | 7.38      | 0.00    |
| cognitive_health             | (Intercept)       | 3.07     | 0.03      | 101.50    | 0.00    |
|                              | Below average     | -0.42    | 0.10      | -4.08     | 0.00    |
| mental_health                | (Intercept)       | 3.06     | 0.03      | 97.59     | 0.00    |
|                              | Below average     | -0.19    | 0.08      | -2.36     | 0.02    |
| illness_experience           | (Intercept)       | 2.99     | 0.04      | 81.65     | 0.00    |
|                              | Yes               | 0.12     | 0.06      | 2.07      | 0.04    |
| brain_disease_caregiver      | (Intercept)       | 2.94     | 0.04      | 77.70     | 0.00    |
|                              | Yes               | 0.21     | 0.06      | 3.63      | 0.00    |
| brain_research_participation | (Intercept)       | 3.06     | 0.04      | 78.97     | 0.00    |
|                              | Yes               | -0.04    | 0.06      | -0.77     | 0.44    |
| relationship                 | (Intercept)       | 3.00     | 0.04      | 70.12     | 0.00    |
|                              | Stable            | 0.07     | 0.06      | 1.19      | 0.23    |

## 2.2.5 Question 2: binary - Middle age

| fct                          | term              | estimate | std.error | statistic | p.value |
|------------------------------|-------------------|----------|-----------|-----------|---------|
|                              | (Intercept)       | 3.01     | 0.04      | 71.66     | 0.00    |
| age                          | 41-60             | 0.52     | 0.07      | 7.17      | 0.00    |
|                              | <= 40             | -0.20    | 0.08      | -2.57     | 0.01    |
| education                    | (Intercept)       | 3.16     | 0.04      | 85.70     | 0.00    |
|                              | Lower             | -0.08    | 0.06      | -1.20     | 0.23    |
| gender                       | (Intercept)       | 3.48     | 0.04      | 82.85     | 0.00    |
|                              | Man               | -0.89    | 0.06      | -14.53    | 0.00    |
|                              | Other/Undisclosed | -1.41    | 0.29      | -4.91     | 0.00    |
| healthcare_experience        | (Intercept)       | 2.99     | 0.04      | 82.84     | 0.00    |
|                              | Yes               | 0.43     | 0.07      | 6.47      | 0.00    |
| cognitive_health             | (Intercept)       | 3.17     | 0.03      | 100.16    | 0.00    |
|                              | Below average     | -0.43    | 0.11      | -3.98     | 0.00    |
| mental_health                | (Intercept)       | 3.19     | 0.03      | 95.93     | 0.00    |
|                              | Below average     | -0.36    | 0.08      | -4.49     | 0.00    |
| illness_experience           | (Intercept)       | 3.09     | 0.04      | 80.68     | 0.00    |
|                              | Yes               | 0.13     | 0.06      | 2.02      | 0.04    |
| brain_disease_caregiver      | (Intercept)       | 2.96     | 0.04      | 77.62     | 0.00    |
|                              | Yes               | 0.43     | 0.06      | 6.89      | 0.00    |
| brain_research_participation | (Intercept)       | 3.12     | 0.04      | 78.37     | 0.00    |
|                              | Yes               | 0.04     | 0.06      | 0.73      | 0.46    |
| relationship                 | (Intercept)       | 3.08     | 0.04      | 69.46     | 0.00    |
|                              | Stable            | 0.11     | 0.06      | 1.79      | 0.07    |

### 2.2.6 Question 2: binary - Old age

| fct                          | term              | estimate | std.error | statistic | p.value |
|------------------------------|-------------------|----------|-----------|-----------|---------|
|                              | (Intercept)       | 3.23     | 0.05      | 69.57     | 0.00    |
| age                          | 41-60             | 0.17     | 0.07      | 2.35      | 0.02    |
|                              | <= 40             | -0.60    | 0.08      | -7.93     | 0.00    |
| education                    | (Intercept)       | 3.24     | 0.04      | 84.73     | 0.00    |
|                              | Lower             | -0.23    | 0.06      | -3.60     | 0.00    |
| gender                       | (Intercept)       | 3.50     | 0.04      | 82.59     | 0.00    |
|                              | Man               | -0.88    | 0.06      | -14.25    | 0.00    |
|                              | Other/Undisclosed | -1.05    | 0.33      | -3.17     | 0.00    |
| healthcare_experience        | (Intercept)       | 3.04     | 0.04      | 82.38     | 0.00    |
|                              | Yes               | 0.35     | 0.07      | 5.26      | 0.00    |
| cognitive_health             | (Intercept)       | 3.19     | 0.03      | 99.83     | 0.00    |
|                              | Below average     | -0.42    | 0.11      | -3.87     | 0.00    |
| mental_health                | (Intercept)       | 3.23     | 0.03      | 95.43     | 0.00    |
|                              | Below average     | -0.43    | 0.08      | -5.41     | 0.00    |
| illness_experience           | (Intercept)       | 3.12     | 0.04      | 80.34     | 0.00    |
|                              | Yes               | 0.10     | 0.06      | 1.59      | 0.11    |
| brain_disease_caregiver      | (Intercept)       | 3.02     | 0.04      | 77.11     | 0.00    |
|                              | Yes               | 0.34     | 0.06      | 5.48      | 0.00    |
| brain_research_participation | (Intercept)       | 3.09     | 0.04      | 78.74     | 0.00    |
|                              | Yes               | 0.19     | 0.06      | 2.97      | 0.00    |
| relationship                 | (Intercept)       | 3.06     | 0.04      | 69.64     | 0.00    |
|                              | Stable            | 0.19     | 0.06      | 3.09      | 0.00    |

### 2.3 Ordinal models



## 2.3.1 Question 2: ordinal - In the womb

| fct                     | term                               | estimate | std.error | statistic | coef.type   |
|-------------------------|------------------------------------|----------|-----------|-----------|-------------|
| age                     | 41-60                              | 0.36     | 0.03      | 14.06     | coefficient |
|                         | <= 40                              | 0.41     | 0.03      | 11.92     | coefficient |
|                         | Not important Moderately important | -2.82    | 0.03      | -91.71    | scale       |
|                         | Moderately important Important     | -1.44    | 0.02      | -71.71    | scale       |
|                         | Important Very important           | 0.01     | 0.02      | 0.53      | scale       |
| education               | Lower                              | -0.47    | 0.02      | -19.05    | coefficient |
|                         | Not important Moderately important | -3.18    | 0.03      | -105.36   | scale       |
|                         | Moderately important Important     | -1.80    | 0.02      | -95.89    | scale       |
|                         | Important Very important           | -0.34    | 0.01      | -23.36    | scale       |
| gender                  | Man                                | -0.45    | 0.03      | -17.48    | coefficient |
|                         | Other/Undisclosed                  | 0.04     | 0.18      | 0.22      | coefficient |
|                         | Not important Moderately important | -3.15    | 0.03      | -105.21   | scale       |
|                         | Moderately important Important     | -1.77    | 0.02      | -96.10    | scale       |
|                         | Important Very important           | -0.32    | 0.01      | -22.24    | scale       |
| healthcare_experience   | Yes                                | 0.53     | 0.02      | 21.60     | coefficient |
|                         | Not important Moderately important | -2.83    | 0.03      | -95.61    | scale       |
|                         | Moderately important Important     | -1.45    | 0.02      | -79.22    | scale       |
|                         | Important Very important           | 0.01     | 0.02      | 0.66      | scale       |
| cognitive_health        | Below average                      | -0.39    | 0.05      | -8.04     | coefficient |
|                         | Not important Moderately important | -3.03    | 0.03      | -105.28   | scale       |
|                         | Moderately important Important     | -1.66    | 0.02      | -99.23    | scale       |
|                         | Important Very important           | -0.22    | 0.01      | -17.21    | scale       |
| mental_health           | Below average                      | -0.01    | 0.03      | -0.22     | coefficient |
|                         | Not important Moderately important | -3.01    | 0.03      | -103.92   | scale       |
|                         | Moderately important Important     | -1.64    | 0.02      | -96.26    | scale       |
|                         | Important Very important           | -0.19    | 0.01      | -14.94    | scale       |
| illness_experience      | Yes                                | 0.02     | 0.02      | 0.86      | coefficient |
|                         | Not important Moderately important | -3.00    | 0.03      | -99.59    | scale       |
|                         | Moderately important Important     | -1.63    | 0.02      | -86.01    | scale       |
|                         | Important Very important           | -0.18    | 0.02      | -11.95    | scale       |
| brain_disease_caregiver | Yes                                | 0.17     | 0.02      | 7.15      | coefficient |
|                         | Not important Moderately important | -2.93    | 0.03      | -96.53    | scale       |
|                         | Moderately important Important     | -1.56    | 0.02      | -80.16    | scale       |
|                         | Important Very important           | -0.11    | 0.02      | -7.05     | scale       |
|                         | Yes                                | 0.02     | 0.02      | 0.83      | coefficient |
|                         | Not important Moderately important | -3.00    | 0.03      | -98.90    | scale       |

*(continued)*

| fct                          | term                               | estimate | std.error | statistic | coef.type   |
|------------------------------|------------------------------------|----------|-----------|-----------|-------------|
| brain_research_participation | Moderately important Important     | -1.63    | 0.02      | -84.53    | scale       |
|                              | Important Very important           | -0.18    | 0.02      | -11.65    | scale       |
|                              | Stable                             | 0.04     | 0.02      | 1.75      | coefficient |
| relationship                 | Not important Moderately important | -2.98    | 0.03      | -95.12    | scale       |
|                              | Moderately important Important     | -1.61    | 0.02      | -77.15    | scale       |
|                              | Important Very important           | -0.17    | 0.02      | -9.51     | scale       |

For peer review only

## 2.3.2 Question 2: ordinal - Childhood

| fct                     | term                               | estimate | std.error | statistic | coef.type   |
|-------------------------|------------------------------------|----------|-----------|-----------|-------------|
| age                     | 41-60                              | 0.42     | 0.03      | 14.35     | coefficient |
|                         | <= 40                              | 0.75     | 0.04      | 17.90     | coefficient |
|                         | Not important Moderately important | -4.83    | 0.08      | -62.21    | scale       |
|                         | Moderately important Important     | -2.68    | 0.03      | -89.23    | scale       |
|                         | Important Very important           | -0.67    | 0.02      | -35.65    | scale       |
| education               | Lower                              | -0.40    | 0.03      | -14.12    | coefficient |
|                         | Not important Moderately important | -5.21    | 0.08      | -67.28    | scale       |
|                         | Moderately important Important     | -3.07    | 0.03      | -104.07   | scale       |
|                         | Important Very important           | -1.06    | 0.02      | -63.85    | scale       |
| gender                  | Man                                | -0.30    | 0.03      | -10.27    | coefficient |
|                         | Other/Undisclosed                  | 0.26     | 0.22      | 1.18      | coefficient |
|                         | Not important Moderately important | -5.16    | 0.08      | -66.77    | scale       |
|                         | Moderately important Important     | -3.02    | 0.03      | -103.70   | scale       |
|                         | Important Very important           | -1.02    | 0.02      | -62.99    | scale       |
| healthcare_experience   | Yes                                | 0.40     | 0.03      | 14.30     | coefficient |
|                         | Not important Moderately important | -4.93    | 0.08      | -63.89    | scale       |
|                         | Moderately important Important     | -2.79    | 0.03      | -96.22    | scale       |
|                         | Important Very important           | -0.78    | 0.02      | -47.14    | scale       |
| cognitive_health        | Below average                      | -0.34    | 0.05      | -6.48     | coefficient |
|                         | Not important Moderately important | -5.09    | 0.08      | -66.32    | scale       |
|                         | Moderately important Important     | -2.95    | 0.03      | -106.19   | scale       |
|                         | Important Very important           | -0.95    | 0.01      | -68.57    | scale       |
| mental_health           | Below average                      | 0.13     | 0.04      | 3.18      | coefficient |
|                         | Not important Moderately important | -5.05    | 0.08      | -65.76    | scale       |
|                         | Moderately important Important     | -2.91    | 0.03      | -104.24   | scale       |
|                         | Important Very important           | -0.91    | 0.01      | -63.83    | scale       |
| illness_experience      | Yes                                | 0.01     | 0.03      | 0.38      | coefficient |
|                         | Not important Moderately important | -5.07    | 0.08      | -65.39    | scale       |
|                         | Moderately important Important     | -2.92    | 0.03      | -98.86    | scale       |
|                         | Important Very important           | -0.93    | 0.02      | -53.62    | scale       |
| brain_disease_caregiver | Yes                                | -0.02    | 0.03      | -0.88     | coefficient |
|                         | Not important Moderately important | -5.08    | 0.08      | -65.38    | scale       |
|                         | Moderately important Important     | -2.94    | 0.03      | -97.21    | scale       |
|                         | Important Very important           | -0.94    | 0.02      | -51.38    | scale       |
|                         | Yes                                | -0.08    | 0.03      | -2.96     | coefficient |
|                         | Not important Moderately important | -5.11    | 0.08      | -65.76    | scale       |

*(continued)*

| fct                          | term                               | estimate | std.error | statistic | coef.type   |
|------------------------------|------------------------------------|----------|-----------|-----------|-------------|
| brain_research_participation | Moderately important Important     | -2.96    | 0.03      | -98.75    | scale       |
|                              | Important Very important           | -0.96    | 0.02      | -53.99    | scale       |
| relationship                 | Stable                             | -0.05    | 0.03      | -2.04     | coefficient |
|                              | Not important Moderately important | -5.10    | 0.08      | -65.22    | scale       |
|                              | Moderately important Important     | -2.96    | 0.03      | -94.07    | scale       |
|                              | Important Very important           | -0.96    | 0.02      | -47.50    | scale       |

For peer review only

## 2.3.3 Question 2: ordinal - Adolescence

| fct                     | term                               | estimate | std.error | statistic | coef.type   |
|-------------------------|------------------------------------|----------|-----------|-----------|-------------|
| age                     | 41-60                              | 0.38     | 0.03      | 13.32     | coefficient |
|                         | <= 40                              | 0.66     | 0.04      | 16.26     | coefficient |
|                         | Not important Moderately important | -5.56    | 0.11      | -50.61    | scale       |
|                         | Moderately important Important     | -3.12    | 0.04      | -88.13    | scale       |
|                         | Important Very important           | -0.62    | 0.02      | -33.11    | scale       |
| education               | Lower                              | -0.23    | 0.03      | -8.34     | coefficient |
|                         | Not important Moderately important | -5.86    | 0.11      | -53.44    | scale       |
|                         | Moderately important Important     | -3.42    | 0.03      | -98.66    | scale       |
|                         | Important Very important           | -0.93    | 0.02      | -57.62    | scale       |
| gender                  | Man                                | -0.34    | 0.03      | -12.01    | coefficient |
|                         | Other/Undisclosed                  | 0.31     | 0.22      | 1.43      | coefficient |
|                         | Not important Moderately important | -5.89    | 0.11      | -53.71    | scale       |
|                         | Moderately important Important     | -3.45    | 0.03      | -99.56    | scale       |
|                         | Important Very important           | -0.95    | 0.02      | -59.87    | scale       |
| healthcare_experience   | Yes                                | 0.35     | 0.03      | 12.77     | coefficient |
|                         | Not important Moderately important | -5.66    | 0.11      | -51.65    | scale       |
|                         | Moderately important Important     | -3.22    | 0.03      | -93.38    | scale       |
|                         | Important Very important           | -0.72    | 0.02      | -44.12    | scale       |
| cognitive_health        | Below average                      | -0.27    | 0.05      | -4.99     | coefficient |
|                         | Not important Moderately important | -5.80    | 0.11      | -53.05    | scale       |
|                         | Moderately important Important     | -3.36    | 0.03      | -100.36   | scale       |
|                         | Important Very important           | -0.87    | 0.01      | -63.84    | scale       |
| mental_health           | Below average                      | 0.12     | 0.04      | 3.07      | coefficient |
|                         | Not important Moderately important | -5.77    | 0.11      | -52.75    | scale       |
|                         | Moderately important Important     | -3.33    | 0.03      | -99.00    | scale       |
|                         | Important Very important           | -0.84    | 0.01      | -59.49    | scale       |
| illness_experience      | Yes                                | 0.04     | 0.03      | 1.55      | coefficient |
|                         | Not important Moderately important | -5.77    | 0.11      | -52.56    | scale       |
|                         | Moderately important Important     | -3.33    | 0.03      | -95.27    | scale       |
|                         | Important Very important           | -0.84    | 0.02      | -49.34    | scale       |
| brain_disease_caregiver | Yes                                | 0.02     | 0.03      | 0.64      | coefficient |
|                         | Not important Moderately important | -5.78    | 0.11      | -52.55    | scale       |
|                         | Moderately important Important     | -3.34    | 0.04      | -94.16    | scale       |
|                         | Important Very important           | -0.85    | 0.02      | -47.15    | scale       |
|                         | Yes                                | 0.01     | 0.03      | 0.30      | coefficient |
|                         | Not important Moderately important | -5.78    | 0.11      | -52.62    | scale       |

(continued)

| fct                          | term                               | estimate | std.error | statistic | coef.type   |
|------------------------------|------------------------------------|----------|-----------|-----------|-------------|
| brain_research_participation | Moderately important Important     | -3.34    | 0.04      | -94.96    | scale       |
|                              | Important Very important           | -0.85    | 0.02      | -48.79    | scale       |
| relationship                 | Stable                             | -0.10    | 0.03      | -3.76     | coefficient |
|                              | Not important Moderately important | -5.84    | 0.11      | -52.95    | scale       |
|                              | Moderately important Important     | -3.40    | 0.04      | -92.85    | scale       |
|                              | Important Very important           | -0.91    | 0.02      | -45.45    | scale       |

For peer review only

## 2.3.4 Question 2: ordinal - Young adulthood

| fct                     | term                               | estimate | std.error | statistic | coef.type   |
|-------------------------|------------------------------------|----------|-----------|-----------|-------------|
| age                     | 41-60                              | 0.24     | 0.03      | 8.95      | coefficient |
|                         | <= 40                              | 0.26     | 0.04      | 7.35      | coefficient |
|                         | Not important Moderately important | -6.22    | 0.14      | -42.98    | scale       |
|                         | Moderately important Important     | -2.91    | 0.03      | -92.86    | scale       |
|                         | Important Very important           | -0.25    | 0.02      | -14.00    | scale       |
| education               | Lower                              | -0.05    | 0.03      | -2.10     | coefficient |
|                         | Not important Moderately important | -6.36    | 0.14      | -43.98    | scale       |
|                         | Moderately important Important     | -3.05    | 0.03      | -101.48   | scale       |
|                         | Important Very important           | -0.40    | 0.01      | -26.85    | scale       |
| gender                  | Man                                | -0.41    | 0.03      | -15.28    | coefficient |
|                         | Other/Undisclosed                  | -0.11    | 0.18      | -0.59     | coefficient |
|                         | Not important Moderately important | -6.48    | 0.14      | -44.75    | scale       |
|                         | Moderately important Important     | -3.17    | 0.03      | -104.40   | scale       |
|                         | Important Very important           | -0.50    | 0.01      | -33.93    | scale       |
| healthcare_experience   | Yes                                | 0.32     | 0.03      | 12.52     | coefficient |
|                         | Not important Moderately important | -6.23    | 0.14      | -43.09    | scale       |
|                         | Moderately important Important     | -2.92    | 0.03      | -97.06    | scale       |
|                         | Important Very important           | -0.26    | 0.02      | -16.82    | scale       |
| cognitive_health        | Below average                      | -0.15    | 0.05      | -3.02     | coefficient |
|                         | Not important Moderately important | -6.36    | 0.14      | -43.98    | scale       |
|                         | Moderately important Important     | -3.05    | 0.03      | -104.72   | scale       |
|                         | Important Very important           | -0.39    | 0.01      | -30.73    | scale       |
| mental_health           | Below average                      | -0.01    | 0.04      | -0.21     | coefficient |
|                         | Not important Moderately important | -6.35    | 0.14      | -43.91    | scale       |
|                         | Moderately important Important     | -3.04    | 0.03      | -103.73   | scale       |
|                         | Important Very important           | -0.38    | 0.01      | -28.96    | scale       |
| illness_experience      | Yes                                | 0.11     | 0.02      | 4.58      | coefficient |
|                         | Not important Moderately important | -6.30    | 0.14      | -43.53    | scale       |
|                         | Moderately important Important     | -2.99    | 0.03      | -98.31    | scale       |
|                         | Important Very important           | -0.34    | 0.02      | -21.24    | scale       |
| brain_disease_caregiver | Yes                                | 0.18     | 0.02      | 7.39      | coefficient |
|                         | Not important Moderately important | -6.27    | 0.14      | -43.26    | scale       |
|                         | Moderately important Important     | -2.96    | 0.03      | -96.03    | scale       |
|                         | Important Very important           | -0.30    | 0.02      | -17.92    | scale       |
|                         | Yes                                | 0.08     | 0.02      | 3.25      | coefficient |
|                         | Not important Moderately important | -6.31    | 0.14      | -43.58    | scale       |

*(continued)*

| fct                          | term                               | estimate | std.error | statistic | coef.type   |
|------------------------------|------------------------------------|----------|-----------|-----------|-------------|
| brain_research_participation | Moderately important Important     | -3.00    | 0.03      | -97.93    | scale       |
|                              | Important Very important           | -0.35    | 0.02      | -21.42    | scale       |
| relationship                 | Stable                             | -0.03    | 0.02      | -1.05     | coefficient |
|                              | Not important Moderately important | -6.33    | 0.14      | -44.12    | scale       |
|                              | Moderately important Important     | -3.05    | 0.03      | -95.27    | scale       |
|                              | Important Very important           | -0.39    | 0.02      | -21.42    | scale       |

For peer review only



## 2.3.5 Question 2: ordinal - Middle age

| fct                     | term                               | estimate | std.error | statistic | coef.type   |
|-------------------------|------------------------------------|----------|-----------|-----------|-------------|
| age                     | 41-60                              | 0.35     | 0.03      | 12.69     | coefficient |
|                         | <= 40                              | -0.01    | 0.04      | -0.32     | coefficient |
|                         | Not important Moderately important | -6.23    | 0.14      | -43.01    | scale       |
|                         | Moderately important Important     | -3.02    | 0.03      | -92.29    | scale       |
|                         | Important Very important           | -0.46    | 0.02      | -25.37    | scale       |
| education               | Lower                              | -0.04    | 0.03      | -1.47     | coefficient |
|                         | Not important Moderately important | -6.35    | 0.14      | -44.05    | scale       |
|                         | Moderately important Important     | -3.15    | 0.03      | -100.25   | scale       |
|                         | Important Very important           | -0.60    | 0.02      | -39.50    | scale       |
| gender                  | Man                                | -0.54    | 0.03      | -19.76    | coefficient |
|                         | Other/Undisclosed                  | -0.45    | 0.18      | -2.45     | coefficient |
|                         | Not important Moderately important | -6.50    | 0.14      | -45.45    | scale       |
|                         | Moderately important Important     | -3.32    | 0.03      | -104.16   | scale       |
|                         | Important Very important           | -0.75    | 0.02      | -49.01    | scale       |
| healthcare_experience   | Yes                                | 0.23     | 0.03      | 8.82      | coefficient |
|                         | Not important Moderately important | -6.26    | 0.14      | -43.29    | scale       |
|                         | Moderately important Important     | -3.05    | 0.03      | -96.76    | scale       |
|                         | Important Very important           | -0.50    | 0.02      | -31.56    | scale       |
| cognitive_health        | Below average                      | -0.15    | 0.05      | -2.97     | coefficient |
|                         | Not important Moderately important | -6.36    | 0.14      | -43.99    | scale       |
|                         | Moderately important Important     | -3.15    | 0.03      | -103.43   | scale       |
|                         | Important Very important           | -0.60    | 0.01      | -45.89    | scale       |
| mental_health           | Below average                      | -0.06    | 0.04      | -1.57     | coefficient |
|                         | Not important Moderately important | -6.34    | 0.14      | -44.15    | scale       |
|                         | Moderately important Important     | -3.14    | 0.03      | -102.64   | scale       |
|                         | Important Very important           | -0.59    | 0.01      | -44.03    | scale       |
| illness_experience      | Yes                                | 0.06     | 0.03      | 2.42      | coefficient |
|                         | Not important Moderately important | -6.32    | 0.14      | -43.79    | scale       |
|                         | Moderately important Important     | -3.11    | 0.03      | -97.73    | scale       |
|                         | Important Very important           | -0.56    | 0.02      | -34.71    | scale       |
| brain_disease_caregiver | Yes                                | 0.32     | 0.03      | 12.90     | coefficient |
|                         | Not important Moderately important | -6.21    | 0.14      | -42.99    | scale       |
|                         | Moderately important Important     | -3.00    | 0.03      | -93.80    | scale       |
|                         | Important Very important           | -0.44    | 0.02      | -26.08    | scale       |
|                         | Yes                                | 0.11     | 0.03      | 4.50      | coefficient |
|                         | Not important Moderately important | -6.30    | 0.14      | -43.49    | scale       |

*(continued)*

| fct                          | term                               | estimate | std.error | statistic | coef.type   |
|------------------------------|------------------------------------|----------|-----------|-----------|-------------|
| brain_research_participation | Moderately important Important     | -3.09    | 0.03      | -96.61    | scale       |
|                              | Important Very important           | -0.54    | 0.02      | -32.58    | scale       |
| relationship                 | Stable                             | 0.06     | 0.03      | 2.28      | coefficient |
|                              | Not important Moderately important | -6.32    | 0.15      | -43.43    | scale       |
|                              | Moderately important Important     | -3.10    | 0.03      | -93.44    | scale       |
|                              | Important Very important           | -0.56    | 0.02      | -29.55    | scale       |

For peer review only

## 2.3.6 Question 2: ordinal - Old age

| fct                     | term                               | estimate | std.error | statistic | coef.type   |
|-------------------------|------------------------------------|----------|-----------|-----------|-------------|
| age                     | 41-60                              | 0.02     | 0.03      | 0.73      | coefficient |
|                         | <= 40                              | -0.30    | 0.04      | -7.86     | coefficient |
|                         | Not important Moderately important | -5.63    | 0.10      | -56.36    | scale       |
|                         | Moderately important Important     | -3.21    | 0.03      | -94.19    | scale       |
|                         | Important Very important           | -1.02    | 0.02      | -51.00    | scale       |
| education               | Lower                              | -0.14    | 0.03      | -4.92     | coefficient |
|                         | Not important Moderately important | -5.63    | 0.10      | -56.74    | scale       |
|                         | Moderately important Important     | -3.21    | 0.03      | -100.08   | scale       |
|                         | Important Very important           | -1.03    | 0.02      | -62.27    | scale       |
| gender                  | Man                                | -0.41    | 0.03      | -14.21    | coefficient |
|                         | Other/Undisclosed                  | -0.50    | 0.19      | -2.67     | coefficient |
|                         | Not important Moderately important | -5.72    | 0.10      | -57.62    | scale       |
|                         | Moderately important Important     | -3.30    | 0.03      | -102.30   | scale       |
|                         | Important Very important           | -1.11    | 0.02      | -67.19    | scale       |
| healthcare_experience   | Yes                                | 0.13     | 0.03      | 4.73      | coefficient |
|                         | Not important Moderately important | -5.53    | 0.10      | -55.76    | scale       |
|                         | Moderately important Important     | -3.11    | 0.03      | -96.61    | scale       |
|                         | Important Very important           | -0.93    | 0.02      | -54.50    | scale       |
| cognitive_health        | Below average                      | -0.15    | 0.06      | -2.77     | coefficient |
|                         | Not important Moderately important | -5.59    | 0.10      | -56.60    | scale       |
|                         | Moderately important Important     | -3.17    | 0.03      | -103.01   | scale       |
|                         | Important Very important           | -0.99    | 0.01      | -70.78    | scale       |
| mental_health           | Below average                      | -0.11    | 0.04      | -2.83     | coefficient |
|                         | Not important Moderately important | -5.60    | 0.10      | -56.61    | scale       |
|                         | Moderately important Important     | -3.18    | 0.03      | -102.29   | scale       |
|                         | Important Very important           | -1.00    | 0.01      | -68.38    | scale       |
| illness_experience      | Yes                                | 0.04     | 0.03      | 1.47      | coefficient |
|                         | Not important Moderately important | -5.57    | 0.10      | -56.04    | scale       |
|                         | Moderately important Important     | -3.15    | 0.03      | -96.92    | scale       |
|                         | Important Very important           | -0.97    | 0.02      | -55.33    | scale       |
| brain_disease_caregiver | Yes                                | 0.26     | 0.03      | 9.43      | coefficient |
|                         | Not important Moderately important | -5.47    | 0.10      | -55.05    | scale       |
|                         | Moderately important Important     | -3.05    | 0.03      | -93.46    | scale       |
|                         | Important Very important           | -0.87    | 0.02      | -48.00    | scale       |
|                         | Yes                                | 0.19     | 0.03      | 6.92      | coefficient |
|                         | Not important Moderately important | -5.50    | 0.10      | -55.42    | scale       |

*(continued)*

| fct                          | term                               | estimate | std.error | statistic | coef.type   |
|------------------------------|------------------------------------|----------|-----------|-----------|-------------|
| brain_research_participation | Moderately important Important     | -3.08    | 0.03      | -94.99    | scale       |
|                              | Important Very important           | -0.90    | 0.02      | -51.13    | scale       |
|                              | Stable                             | 0.08     | 0.03      | 2.82      | coefficient |
| relationship                 | Not important Moderately important | -5.54    | 0.10      | -55.50    | scale       |
|                              | Moderately important Important     | -3.12    | 0.03      | -91.85    | scale       |
|                              | Important Very important           | -0.94    | 0.02      | -46.55    | scale       |

## 2.4 Comparison binary and continuous model results

### 2.4.1 Question 2: bin\_vs\_cont - In the womb

| fct                          | Binary |          |           |           |         | Continuous |      |           |           |         |
|------------------------------|--------|----------|-----------|-----------|---------|------------|------|-----------|-----------|---------|
|                              | term   | log_odds | std.error | statistic | p.value | term       | beta | std.error | statistic | p.value |
| brain_research_participation | Yes    | -0.03    | 0.03      | -1.05     | 0.29    | Yes        | 0    | 0.01      | 0.42      | 0.67    |

### 2.4.2 Question 2: bin\_vs\_cont - Childhood

| fct                     | Binary            |          |           |           |         | Continuous        |      |           |           |         |
|-------------------------|-------------------|----------|-----------|-----------|---------|-------------------|------|-----------|-----------|---------|
|                         | term              | log_odds | std.error | statistic | p.value | term              | beta | std.error | statistic | p.value |
| gender                  | Other/Undisclosed | -0.12    | 0.42      | -0.28     | 0.78    | Other/Undisclosed | 0.04 | 0.05      | 0.80      | 0.42    |
| mental_health           | Below average     | -0.04    | 0.08      | -0.46     | 0.65    | Below average     | 0.02 | 0.01      | 2.17      | 0.03    |
| brain_disease_caregiver | Yes               | 0.02     | 0.06      | 0.29      | 0.77    | Yes               | 0.00 | 0.01      | -0.41     | 0.68    |

### 2.4.3 Question 2: bin\_vs\_cont - Adolescence

| fct                          | Binary            |          |           |           |         | Continuous        |      |           |           |         |
|------------------------------|-------------------|----------|-----------|-----------|---------|-------------------|------|-----------|-----------|---------|
|                              | term              | log_odds | std.error | statistic | p.value | term              | beta | std.error | statistic | p.value |
| gender                       | Other/Undisclosed | -0.29    | 0.46      | -0.64     | 0.52    | Other/Undisclosed | 0.05 | 0.05      | 0.94      | 0.35    |
| mental_health                | Below average     | -0.11    | 0.09      | -1.16     | 0.25    | Below average     | 0.02 | 0.01      | 2.32      | 0.02    |
| illness_experience           | Yes               | -0.01    | 0.07      | -0.12     | 0.91    | Yes               | 0.01 | 0.01      | 1.19      | 0.24    |
| brain_disease_caregiver      | Yes               | 0.00     | 0.07      | -0.02     | 0.98    | Yes               | 0.00 | 0.01      | 0.66      | 0.51    |
| brain_research_participation | Yes               | -0.05    | 0.07      | -0.68     | 0.50    | Yes               | 0.00 | 0.01      | 0.09      | 0.93    |

### 2.4.4 Question 2: bin\_vs\_cont - Young adulthood

| fct                          | Binary |          |           |           |         | Continuous |       |           |           |         |
|------------------------------|--------|----------|-----------|-----------|---------|------------|-------|-----------|-----------|---------|
|                              | term   | log_odds | std.error | statistic | p.value | term       | beta  | std.error | statistic | p.value |
| education                    | Lower  | 0.05     | 0.06      | 0.86      | 0.39    | Lower      | -0.01 | 0.01      | -1.85     | 0.06    |
| brain_research_participation | Yes    | -0.04    | 0.06      | -0.77     | 0.44    | Yes        | 0.02  | 0.01      | 2.78      | 0.01    |
| relationship                 | Stable | 0.07     | 0.06      | 1.19      | 0.23    | Stable     | 0.00  | 0.01      | -0.67     | 0.51    |

1  
2  
3  
4  
5  
6  
7  
8  
9  
10  
11  
12  
13  
14  
15  
16  
17  
18  
19  
20  
21  
22  
23  
24  
25  
26  
27  
28  
29  
30  
31  
32  
33  
34  
35  
36  
37  
38  
39  
40  
41  
42  
43  
44  
45  
46  
47  
48  
49  
50  
51  
52  
53  
54  
55  
56  
57  
58  
59  
60

**3 Question 3**

**3.1 Binary models**

For peer review only

## 3.1.1 Question 3: binary - Alzheimer's

| fct                          | term              | estimate | std.error | statistic | p.value |
|------------------------------|-------------------|----------|-----------|-----------|---------|
|                              | (Intercept)       | 4.97     | 0.11      | 46.45     | 0.00    |
| age                          | 41-60             | 0.08     | 0.16      | 0.47      | 0.64    |
|                              | <= 40             | -1.06    | 0.15      | -6.97     | 0.00    |
| education                    | (Intercept)       | 5.02     | 0.09      | 55.72     | 0.00    |
|                              | Lower             | -0.74    | 0.13      | -5.72     | 0.00    |
| gender                       | (Intercept)       | 5.07     | 0.09      | 55.85     | 0.00    |
|                              | Man               | -0.91    | 0.13      | -7.05     | 0.00    |
|                              | Other/Undisclosed | 12.49    | 352.44    | 0.04      | 0.97    |
| healthcare_experience        | (Intercept)       | 4.47     | 0.07      | 61.46     | 0.00    |
|                              | Yes               | 0.86     | 0.16      | 5.45      | 0.00    |
| cognitive_health             | (Intercept)       | 4.75     | 0.07      | 70.47     | 0.00    |
|                              | Below average     | -0.35    | 0.23      | -1.48     | 0.14    |
| mental_health                | (Intercept)       | 4.80     | 0.07      | 66.87     | 0.00    |
|                              | Below average     | -0.44    | 0.16      | -2.69     | 0.01    |
| illness_experience           | (Intercept)       | 4.89     | 0.09      | 53.86     | 0.00    |
|                              | Yes               | -0.38    | 0.13      | -2.91     | 0.00    |
| brain_disease_caregiver      | (Intercept)       | 4.41     | 0.08      | 58.21     | 0.00    |
|                              | Yes               | 0.85     | 0.14      | 5.86      | 0.00    |
| brain_research_participation | (Intercept)       | 4.46     | 0.08      | 59.30     | 0.00    |
|                              | Yes               | 0.78     | 0.15      | 5.29      | 0.00    |
| relationship                 | (Intercept)       | 4.42     | 0.08      | 52.85     | 0.00    |
|                              | Stable            | 0.65     | 0.13      | 4.90      | 0.00    |

## 3.1.2 Question 3: binary - Schizophrenia

| fct                          | term              | estimate | std.error | statistic | p.value |
|------------------------------|-------------------|----------|-----------|-----------|---------|
|                              | (Intercept)       | 2.98     | 0.04      | 72.17     | 0.00    |
| age                          | 41-60             | 0.38     | 0.07      | 5.62      | 0.00    |
|                              | <= 40             | 0.29     | 0.09      | 3.28      | 0.00    |
| education                    | (Intercept)       | 3.33     | 0.04      | 83.62     | 0.00    |
|                              | Lower             | -0.48    | 0.06      | -7.79     | 0.00    |
| gender                       | (Intercept)       | 3.30     | 0.04      | 85.53     | 0.00    |
|                              | Man               | -0.45    | 0.06      | -7.11     | 0.00    |
|                              | Other/Undisclosed | -0.31    | 0.42      | -0.73     | 0.47    |
| healthcare_experience        | (Intercept)       | 3.01     | 0.04      | 82.83     | 0.00    |
|                              | Yes               | 0.42     | 0.07      | 6.33      | 0.00    |
| cognitive_health             | (Intercept)       | 3.21     | 0.03      | 99.65     | 0.00    |
|                              | Below average     | -0.74    | 0.10      | -7.54     | 0.00    |
| mental_health                | (Intercept)       | 3.15     | 0.03      | 96.65     | 0.00    |
|                              | Below average     | 0.00     | 0.09      | 0.03      | 0.97    |
| illness_experience           | (Intercept)       | 3.22     | 0.04      | 79.23     | 0.00    |
|                              | Yes               | -0.17    | 0.06      | -2.74     | 0.01    |
| brain_disease_caregiver      | (Intercept)       | 3.06     | 0.04      | 76.83     | 0.00    |
|                              | Yes               | 0.22     | 0.06      | 3.58      | 0.00    |
| brain_research_participation | (Intercept)       | 3.02     | 0.04      | 79.51     | 0.00    |
|                              | Yes               | 0.33     | 0.06      | 5.23      | 0.00    |
| relationship                 | (Intercept)       | 3.18     | 0.05      | 68.62     | 0.00    |
|                              | Stable            | -0.04    | 0.06      | -0.69     | 0.49    |

## 3.1.3 Question 3: binary - Depression

| fct                          | term              | estimate | std.error | statistic | p.value |
|------------------------------|-------------------|----------|-----------|-----------|---------|
|                              | (Intercept)       | 2.79     | 0.04      | 73.54     | 0.00    |
| age                          | 41-60             | 0.42     | 0.06      | 6.55      | 0.00    |
|                              | <= 40             | 0.26     | 0.08      | 3.15      | 0.00    |
| education                    | (Intercept)       | 3.08     | 0.04      | 86.76     | 0.00    |
|                              | Lower             | -0.33    | 0.06      | -5.67     | 0.00    |
| gender                       | (Intercept)       | 3.08     | 0.03      | 88.33     | 0.00    |
|                              | Man               | -0.36    | 0.06      | -6.21     | 0.00    |
|                              | Other/Undisclosed | 0.10     | 0.46      | 0.23      | 0.82    |
| healthcare_experience        | (Intercept)       | 2.85     | 0.03      | 84.24     | 0.00    |
|                              | Yes               | 0.32     | 0.06      | 5.38      | 0.00    |
| cognitive_health             | (Intercept)       | 2.99     | 0.03      | 102.71    | 0.00    |
|                              | Below average     | -0.31    | 0.10      | -2.94     | 0.00    |
| mental_health                | (Intercept)       | 2.93     | 0.03      | 99.39     | 0.00    |
|                              | Below average     | 0.34     | 0.09      | 3.63      | 0.00    |
| illness_experience           | (Intercept)       | 2.97     | 0.04      | 81.99     | 0.00    |
|                              | Yes               | 0.00     | 0.06      | -0.02     | 0.99    |
| brain_disease_caregiver      | (Intercept)       | 2.87     | 0.04      | 78.49     | 0.00    |
|                              | Yes               | 0.23     | 0.06      | 4.04      | 0.00    |
| brain_research_participation | (Intercept)       | 2.84     | 0.04      | 81.08     | 0.00    |
|                              | Yes               | 0.32     | 0.06      | 5.49      | 0.00    |
| relationship                 | (Intercept)       | 2.98     | 0.04      | 70.44     | 0.00    |
|                              | Stable            | -0.02    | 0.06      | -0.30     | 0.76    |



## 3.1.4 Question 3: binary - Bipolar

| fct                          | term              | estimate | std.error | statistic | p.value |
|------------------------------|-------------------|----------|-----------|-----------|---------|
|                              | (Intercept)       | 2.08     | 0.03      | 73.75     | 0.00    |
| age                          | 41-60             | 0.78     | 0.05      | 15.01     | 0.00    |
|                              | <= 40             | 0.64     | 0.07      | 9.40      | 0.00    |
| education                    | (Intercept)       | 2.76     | 0.03      | 89.77     | 0.00    |
|                              | Lower             | -0.86    | 0.04      | -19.41    | 0.00    |
| gender                       | (Intercept)       | 2.68     | 0.03      | 91.92     | 0.00    |
|                              | Man               | -0.75    | 0.04      | -16.70    | 0.00    |
|                              | Other/Undisclosed | 0.01     | 0.37      | 0.03      | 0.98    |
| healthcare_experience        | (Intercept)       | 2.19     | 0.03      | 85.72     | 0.00    |
|                              | Yes               | 0.70     | 0.05      | 13.78     | 0.00    |
| cognitive_health             | (Intercept)       | 2.45     | 0.02      | 106.57    | 0.00    |
|                              | Below average     | -0.49    | 0.08      | -6.29     | 0.00    |
| mental_health                | (Intercept)       | 2.39     | 0.02      | 102.47    | 0.00    |
|                              | Below average     | 0.25     | 0.07      | 3.60      | 0.00    |
| illness_experience           | (Intercept)       | 2.42     | 0.03      | 84.89     | 0.00    |
|                              | Yes               | -0.01    | 0.04      | -0.29     | 0.77    |
| brain_disease_caregiver      | (Intercept)       | 2.25     | 0.03      | 80.16     | 0.00    |
|                              | Yes               | 0.41     | 0.05      | 8.97      | 0.00    |
| brain_research_participation | (Intercept)       | 2.26     | 0.03      | 82.64     | 0.00    |
|                              | Yes               | 0.41     | 0.05      | 8.96      | 0.00    |
| relationship                 | (Intercept)       | 2.52     | 0.03      | 72.89     | 0.00    |
|                              | Stable            | -0.18    | 0.04      | -3.92     | 0.00    |

## 3.1.5 Question 3: binary - Anxiety

| fct                          | term              | estimate | std.error | statistic | p.value |
|------------------------------|-------------------|----------|-----------|-----------|---------|
|                              | (Intercept)       | 2.09     | 0.03      | 73.83     | 0.00    |
| age                          | 41-60             | 0.43     | 0.05      | 9.24      | 0.00    |
|                              | <= 40             | 0.37     | 0.06      | 5.91      | 0.00    |
| education                    | (Intercept)       | 2.39     | 0.03      | 91.09     | 0.00    |
|                              | Lower             | -0.29    | 0.04      | -6.68     | 0.00    |
| gender                       | (Intercept)       | 2.36     | 0.03      | 92.74     | 0.00    |
|                              | Man               | -0.23    | 0.04      | -5.17     | 0.00    |
|                              | Other/Undisclosed | 0.63     | 0.42      | 1.51      | 0.13    |
| healthcare_experience        | (Intercept)       | 2.22     | 0.03      | 85.81     | 0.00    |
|                              | Yes               | 0.22     | 0.04      | 5.02      | 0.00    |
| cognitive_health             | (Intercept)       | 2.31     | 0.02      | 106.50    | 0.00    |
|                              | Below average     | -0.19    | 0.08      | -2.35     | 0.02    |
| mental_health                | (Intercept)       | 2.25     | 0.02      | 102.17    | 0.00    |
|                              | Below average     | 0.41     | 0.07      | 5.85      | 0.00    |
| illness_experience           | (Intercept)       | 2.27     | 0.03      | 84.71     | 0.00    |
|                              | Yes               | 0.07     | 0.04      | 1.63      | 0.10    |
| brain_disease_caregiver      | (Intercept)       | 2.21     | 0.03      | 80.03     | 0.00    |
|                              | Yes               | 0.19     | 0.04      | 4.55      | 0.00    |
| brain_research_participation | (Intercept)       | 2.18     | 0.03      | 82.34     | 0.00    |
|                              | Yes               | 0.28     | 0.04      | 6.49      | 0.00    |
| relationship                 | (Intercept)       | 2.30     | 0.03      | 72.91     | 0.00    |
|                              | Stable            | 0.00     | 0.04      | 0.00      | 1.00    |

## 3.1.6 Question 3: binary - Addiction

| fct                          | term              | estimate | std.error | statistic | p.value |
|------------------------------|-------------------|----------|-----------|-----------|---------|
|                              | (Intercept)       | 1.86     | 0.03      | 71.70     | 0.00    |
| age                          | 41-60             | 0.31     | 0.04      | 7.54      | 0.00    |
|                              | <= 40             | 0.41     | 0.06      | 7.06      | 0.00    |
| education                    | (Intercept)       | 2.20     | 0.02      | 90.62     | 0.00    |
|                              | Lower             | -0.47    | 0.04      | -12.10    | 0.00    |
| gender                       | (Intercept)       | 2.20     | 0.02      | 92.28     | 0.00    |
|                              | Man               | -0.51    | 0.04      | -12.94    | 0.00    |
|                              | Other/Undisclosed | 0.05     | 0.30      | 0.17      | 0.86    |
| healthcare_experience        | (Intercept)       | 1.81     | 0.02      | 81.89     | 0.00    |
|                              | Yes               | 0.68     | 0.04      | 15.89     | 0.00    |
| cognitive_health             | (Intercept)       | 2.06     | 0.02      | 104.94    | 0.00    |
|                              | Below average     | -0.38    | 0.07      | -5.35     | 0.00    |
| mental_health                | (Intercept)       | 2.02     | 0.02      | 100.44    | 0.00    |
|                              | Below average     | 0.11     | 0.06      | 1.99      | 0.05    |
| illness_experience           | (Intercept)       | 2.02     | 0.02      | 83.23     | 0.00    |
|                              | Yes               | 0.03     | 0.04      | 0.76      | 0.45    |
| brain_disease_caregiver      | (Intercept)       | 1.93     | 0.02      | 77.93     | 0.00    |
|                              | Yes               | 0.23     | 0.04      | 6.04      | 0.00    |
| brain_research_participation | (Intercept)       | 1.93     | 0.02      | 80.24     | 0.00    |
|                              | Yes               | 0.26     | 0.04      | 6.82      | 0.00    |
| relationship                 | (Intercept)       | 2.11     | 0.03      | 72.19     | 0.00    |
|                              | Stable            | -0.13    | 0.04      | -3.46     | 0.00    |

## 3.1.7 Question 3: binary - Stroke

| fct                          | term              | estimate | std.error | statistic | p.value |
|------------------------------|-------------------|----------|-----------|-----------|---------|
|                              | (Intercept)       | 1.97     | 0.03      | 72.84     | 0.00    |
| age                          | 41-60             | 0.15     | 0.04      | 3.60      | 0.00    |
|                              | <= 40             | -0.27    | 0.05      | -5.49     | 0.00    |
| education                    | (Intercept)       | 2.02     | 0.02      | 89.24     | 0.00    |
|                              | Lower             | -0.14    | 0.04      | -3.60     | 0.00    |
| gender                       | (Intercept)       | 2.19     | 0.02      | 92.21     | 0.00    |
|                              | Man               | -0.64    | 0.04      | -16.91    | 0.00    |
|                              | Other/Undisclosed | -0.02    | 0.29      | -0.08     | 0.93    |
| healthcare_experience        | (Intercept)       | 1.70     | 0.02      | 79.82     | 0.00    |
|                              | Yes               | 0.89     | 0.04      | 20.45     | 0.00    |
| cognitive_health             | (Intercept)       | 1.98     | 0.02      | 104.04    | 0.00    |
|                              | Below average     | -0.20    | 0.07      | -2.69     | 0.01    |
| mental_health                | (Intercept)       | 1.98     | 0.02      | 100.01    | 0.00    |
|                              | Below average     | -0.09    | 0.05      | -1.71     | 0.09    |
| illness_experience           | (Intercept)       | 1.88     | 0.02      | 81.56     | 0.00    |
|                              | Yes               | 0.25     | 0.04      | 6.56      | 0.00    |
| brain_disease_caregiver      | (Intercept)       | 1.77     | 0.02      | 75.70     | 0.00    |
|                              | Yes               | 0.48     | 0.04      | 12.70     | 0.00    |
| brain_research_participation | (Intercept)       | 1.88     | 0.02      | 79.61     | 0.00    |
|                              | Yes               | 0.23     | 0.04      | 6.17      | 0.00    |
| relationship                 | (Intercept)       | 1.88     | 0.03      | 70.25     | 0.00    |
|                              | Stable            | 0.16     | 0.04      | 4.31      | 0.00    |

## 3.1.8 Question 3: binary - Parkinson's

| fct                          | term              | estimate | std.error | statistic | p.value |
|------------------------------|-------------------|----------|-----------|-----------|---------|
|                              | (Intercept)       | 1.82     | 0.03      | 71.15     | 0.00    |
| age                          | 41-60             | 0.12     | 0.04      | 3.13      | 0.00    |
|                              | <= 40             | -0.22    | 0.05      | -4.62     | 0.00    |
| education                    | (Intercept)       | 1.99     | 0.02      | 88.93     | 0.00    |
|                              | Lower             | -0.46    | 0.04      | -12.87    | 0.00    |
| gender                       | (Intercept)       | 1.89     | 0.02      | 89.32     | 0.00    |
|                              | Man               | -0.21    | 0.04      | -5.63     | 0.00    |
|                              | Other/Undisclosed | -0.16    | 0.25      | -0.64     | 0.52    |
| healthcare_experience        | (Intercept)       | 1.59     | 0.02      | 77.61     | 0.00    |
|                              | Yes               | 0.72     | 0.04      | 18.08     | 0.00    |
| cognitive_health             | (Intercept)       | 1.84     | 0.02      | 101.83    | 0.00    |
|                              | Below average     | -0.26    | 0.07      | -3.84     | 0.00    |
| mental_health                | (Intercept)       | 1.85     | 0.02      | 98.00     | 0.00    |
|                              | Below average     | -0.17    | 0.05      | -3.47     | 0.00    |
| illness_experience           | (Intercept)       | 1.79     | 0.02      | 80.32     | 0.00    |
|                              | Yes               | 0.08     | 0.04      | 2.33      | 0.02    |
| brain_disease_caregiver      | (Intercept)       | 1.67     | 0.02      | 73.91     | 0.00    |
|                              | Yes               | 0.37     | 0.04      | 10.34     | 0.00    |
| brain_research_participation | (Intercept)       | 1.69     | 0.02      | 76.56     | 0.00    |
|                              | Yes               | 0.35     | 0.04      | 9.55      | 0.00    |
| relationship                 | (Intercept)       | 1.73     | 0.03      | 68.21     | 0.00    |
|                              | Stable            | 0.17     | 0.03      | 4.86      | 0.00    |

## 3.1.9 Question 3: binary - Migraine

| fct                          | term              | estimate | std.error | statistic | p.value |
|------------------------------|-------------------|----------|-----------|-----------|---------|
|                              | (Intercept)       | 1.24     | 0.02      | 58.41     | 0.00    |
| age                          | 41-60             | 0.57     | 0.04      | 16.21     | 0.00    |
|                              | <= 40             | 0.78     | 0.05      | 15.24     | 0.00    |
| education                    | (Intercept)       | 1.68     | 0.02      | 83.96     | 0.00    |
|                              | Lower             | -0.38    | 0.03      | -11.48    | 0.00    |
| gender                       | (Intercept)       | 1.62     | 0.02      | 84.32     | 0.00    |
|                              | Man               | -0.25    | 0.03      | -7.46     | 0.00    |
|                              | Other/Undisclosed | 0.04     | 0.24      | 0.18      | 0.86    |
| healthcare_experience        | (Intercept)       | 1.36     | 0.02      | 71.15     | 0.00    |
|                              | Yes               | 0.56     | 0.03      | 16.24     | 0.00    |
| cognitive_health             | (Intercept)       | 1.57     | 0.02      | 95.25     | 0.00    |
|                              | Below average     | -0.28    | 0.06      | -4.46     | 0.00    |
| mental_health                | (Intercept)       | 1.55     | 0.02      | 90.96     | 0.00    |
|                              | Below average     | 0.02     | 0.05      | 0.46      | 0.65    |
| illness_experience           | (Intercept)       | 1.51     | 0.02      | 74.37     | 0.00    |
|                              | Yes               | 0.11     | 0.03      | 3.28      | 0.00    |
| brain_disease_caregiver      | (Intercept)       | 1.44     | 0.02      | 68.88     | 0.00    |
|                              | Yes               | 0.23     | 0.03      | 7.25      | 0.00    |
| brain_research_participation | (Intercept)       | 1.51     | 0.02      | 72.60     | 0.00    |
|                              | Yes               | 0.10     | 0.03      | 3.06      | 0.00    |
| relationship                 | (Intercept)       | 1.53     | 0.02      | 64.47     | 0.00    |
|                              | Stable            | 0.03     | 0.03      | 1.07      | 0.29    |

## 3.1.10 Question 3: binary - Cancer

| fct                          | term              | estimate | std.error | statistic | p.value |
|------------------------------|-------------------|----------|-----------|-----------|---------|
|                              | (Intercept)       | -0.92    | 0.02      | -46.91    | 0.00    |
| age                          | 41-60             | 0.26     | 0.03      | 9.11      | 0.00    |
|                              | <= 40             | 0.44     | 0.04      | 12.00     | 0.00    |
| education                    | (Intercept)       | -0.66    | 0.02      | -42.71    | 0.00    |
|                              | Lower             | -0.31    | 0.03      | -10.70    | 0.00    |
| gender                       | (Intercept)       | -0.67    | 0.02      | -44.48    | 0.00    |
|                              | Man               | -0.28    | 0.03      | -9.47     | 0.00    |
|                              | Other/Undisclosed | 0.15     | 0.18      | 0.82      | 0.41    |
| healthcare_experience        | (Intercept)       | -0.97    | 0.02      | -56.53    | 0.00    |
|                              | Yes               | 0.56     | 0.03      | 21.18     | 0.00    |
| cognitive_health             | (Intercept)       | -0.74    | 0.01      | -55.40    | 0.00    |
|                              | Below average     | -0.19    | 0.06      | -3.45     | 0.00    |
| mental_health                | (Intercept)       | -0.76    | 0.01      | -54.68    | 0.00    |
|                              | Below average     | 0.09     | 0.04      | 2.29      | 0.02    |
| illness_experience           | (Intercept)       | -0.80    | 0.02      | -47.23    | 0.00    |
|                              | Yes               | 0.12     | 0.03      | 4.61      | 0.00    |
| brain_disease_caregiver      | (Intercept)       | -0.86    | 0.02      | -47.50    | 0.00    |
|                              | Yes               | 0.23     | 0.03      | 8.84      | 0.00    |
| brain_research_participation | (Intercept)       | -0.81    | 0.02      | -46.92    | 0.00    |
|                              | Yes               | 0.15     | 0.03      | 5.82      | 0.00    |
| relationship                 | (Intercept)       | -0.75    | 0.02      | -38.60    | 0.00    |
|                              | Stable            | 0.01     | 0.03      | 0.24      | 0.81    |

## 3.1.11 Question 3: binary - Hypertension

| fct                          | term              | estimate | std.error | statistic | p.value |
|------------------------------|-------------------|----------|-----------|-----------|---------|
|                              | (Intercept)       | -0.66    | 0.02      | -35.09    | 0.00    |
| age                          | 41-60             | -0.12    | 0.03      | -4.33     | 0.00    |
|                              | <= 40             | -0.42    | 0.04      | -10.84    | 0.00    |
| education                    | (Intercept)       | -0.69    | 0.02      | -44.50    | 0.00    |
|                              | Lower             | -0.26    | 0.03      | -9.25     | 0.00    |
| gender                       | (Intercept)       | -0.67    | 0.02      | -44.65    | 0.00    |
|                              | Man               | -0.34    | 0.03      | -11.55    | 0.00    |
|                              | Other/Undisclosed | 0.32     | 0.18      | 1.77      | 0.08    |
| healthcare_experience        | (Intercept)       | -1.10    | 0.02      | -62.05    | 0.00    |
|                              | Yes               | 0.80     | 0.03      | 30.39     | 0.00    |
| cognitive_health             | (Intercept)       | -0.76    | 0.01      | -56.94    | 0.00    |
|                              | Below average     | -0.11    | 0.06      | -1.95     | 0.05    |
| mental_health                | (Intercept)       | -0.74    | 0.01      | -53.62    | 0.00    |
|                              | Below average     | -0.19    | 0.04      | -4.82     | 0.00    |
| illness_experience           | (Intercept)       | -0.84    | 0.02      | -49.49    | 0.00    |
|                              | Yes               | 0.18     | 0.03      | 7.04      | 0.00    |
| brain_disease_caregiver      | (Intercept)       | -0.97    | 0.02      | -52.58    | 0.00    |
|                              | Yes               | 0.42     | 0.03      | 16.24     | 0.00    |
| brain_research_participation | (Intercept)       | -0.86    | 0.02      | -48.95    | 0.00    |
|                              | Yes               | 0.20     | 0.03      | 7.80      | 0.00    |
| relationship                 | (Intercept)       | -0.81    | 0.02      | -41.17    | 0.00    |
|                              | Stable            | 0.08     | 0.03      | 2.96      | 0.00    |



## 3.1.12 Question 3: binary - Diabetes

| fct                          | term              | estimate | std.error | statistic | p.value |
|------------------------------|-------------------|----------|-----------|-----------|---------|
|                              | (Intercept)       | -1.71    | 0.02      | -69.58    | 0.00    |
| age                          | 41-60             | 0.14     | 0.04      | 4.01      | 0.00    |
|                              | <= 40             | -0.04    | 0.05      | -0.91     | 0.36    |
| education                    | (Intercept)       | -1.56    | 0.02      | -81.30    | 0.00    |
|                              | Lower             | -0.36    | 0.04      | -9.50     | 0.00    |
| gender                       | (Intercept)       | -1.61    | 0.02      | -83.95    | 0.00    |
|                              | Man               | -0.22    | 0.04      | -5.85     | 0.00    |
|                              | Other/Undisclosed | 0.53     | 0.21      | 2.59      | 0.01    |
| healthcare_experience        | (Intercept)       | -2.13    | 0.02      | -85.37    | 0.00    |
|                              | Yes               | 1.00     | 0.03      | 29.61     | 0.00    |
| cognitive_health             | (Intercept)       | -1.66    | 0.02      | -97.96    | 0.00    |
|                              | Below average     | -0.02    | 0.07      | -0.27     | 0.79    |
| mental_health                | (Intercept)       | -1.64    | 0.02      | -93.62    | 0.00    |
|                              | Below average     | -0.19    | 0.05      | -3.63     | 0.00    |
| illness_experience           | (Intercept)       | -1.76    | 0.02      | -79.82    | 0.00    |
|                              | Yes               | 0.23     | 0.03      | 6.82      | 0.00    |
| brain_disease_caregiver      | (Intercept)       | -1.85    | 0.02      | -76.95    | 0.00    |
|                              | Yes               | 0.38     | 0.03      | 11.36     | 0.00    |
| brain_research_participation | (Intercept)       | -1.75    | 0.02      | -77.66    | 0.00    |
|                              | Yes               | 0.18     | 0.03      | 5.48      | 0.00    |
| relationship                 | (Intercept)       | -1.66    | 0.02      | -67.06    | 0.00    |
|                              | Stable            | -0.01    | 0.03      | -0.16     | 0.87    |

## 3.1.13 Question 3: binary - Arthritis

| fct                          | term              | estimate | std.error | statistic | p.value |
|------------------------------|-------------------|----------|-----------|-----------|---------|
|                              | (Intercept)       | -3.05    | 0.04      | -71.56    | 0.00    |
| age                          | 41-60             | 0.14     | 0.06      | 2.28      | 0.02    |
|                              | <= 40             | 0.01     | 0.08      | 0.11      | 0.91    |
| education                    | (Intercept)       | -2.97    | 0.03      | -87.93    | 0.00    |
|                              | Lower             | -0.06    | 0.06      | -0.95     | 0.34    |
| gender                       | (Intercept)       | -2.92    | 0.03      | -90.08    | 0.00    |
|                              | Man               | -0.29    | 0.07      | -4.29     | 0.00    |
|                              | Other/Undisclosed | 0.23     | 0.37      | 0.62      | 0.54    |
| healthcare_experience        | (Intercept)       | -3.34    | 0.04      | -78.93    | 0.00    |
|                              | Yes               | 0.75     | 0.06      | 13.23     | 0.00    |
| cognitive_health             | (Intercept)       | -3.01    | 0.03      | -102.46   | 0.00    |
|                              | Below average     | 0.29     | 0.11      | 2.70      | 0.01    |
| mental_health                | (Intercept)       | -2.98    | 0.03      | -98.79    | 0.00    |
|                              | Below average     | -0.05    | 0.08      | -0.53     | 0.60    |
| illness_experience           | (Intercept)       | -3.20    | 0.04      | -79.49    | 0.00    |
|                              | Yes               | 0.47     | 0.06      | 8.25      | 0.00    |
| brain_disease_caregiver      | (Intercept)       | -3.12    | 0.04      | -76.19    | 0.00    |
|                              | Yes               | 0.26     | 0.06      | 4.67      | 0.00    |
| brain_research_participation | (Intercept)       | -3.01    | 0.04      | -79.67    | 0.00    |
|                              | Yes               | 0.04     | 0.06      | 0.65      | 0.52    |
| relationship                 | (Intercept)       | -2.90    | 0.04      | -71.01    | 0.00    |
|                              | Stable            | -0.16    | 0.06      | -2.84     | 0.00    |

# Lifebbrain Global Brain Health Survey

for country: all

## Contents

|          |                                            |           |
|----------|--------------------------------------------|-----------|
| <b>1</b> | <b>Question 1</b>                          | <b>2</b>  |
| 1.1      | Overall . . . . .                          | 2         |
| 1.2      | Gender . . . . .                           | 3         |
| 1.3      | Age groups . . . . .                       | 4         |
| 1.4      | Education . . . . .                        | 5         |
| 1.5      | Country . . . . .                          | 6         |
| 1.6      | Health experience/education . . . . .      | 7         |
| 1.7      | Cognitive health . . . . .                 | 8         |
| 1.8      | Mental health . . . . .                    | 9         |
| 1.9      | Illness . . . . .                          | 10        |
| 1.10     | Brain disease care . . . . .               | 11        |
| 1.11     | Research participation . . . . .           | 12        |
| <b>2</b> | <b>Question 2</b>                          | <b>13</b> |
| 2.1      | Overall . . . . .                          | 13        |
| 2.2      | Gender . . . . .                           | 13        |
| 2.3      | Age groups . . . . .                       | 14        |
| 2.4      | Education . . . . .                        | 14        |
| 2.5      | Country . . . . .                          | 15        |
| 2.6      | Health experience/education . . . . .      | 16        |
| 2.7      | Cognitive health . . . . .                 | 17        |
| 2.8      | Mental health . . . . .                    | 17        |
| 2.9      | Illness . . . . .                          | 18        |
| 2.10     | Brain disease care . . . . .               | 18        |
| 2.11     | Research participation . . . . .           | 19        |
| <b>3</b> | <b>Question 3</b>                          | <b>20</b> |
| 3.1      | Overall . . . . .                          | 20        |
| 3.2      | Gender . . . . .                           | 21        |
| 3.3      | Age groups . . . . .                       | 22        |
| 3.4      | Education . . . . .                        | 23        |
| 3.5      | Country . . . . .                          | 24        |
| 3.6      | Health care experience/education . . . . . | 25        |
| 3.7      | Cognitive health . . . . .                 | 26        |
| 3.8      | Mental health . . . . .                    | 27        |
| 3.9      | Illness . . . . .                          | 28        |
| 3.10     | Brain disease care . . . . .               | 29        |
| 3.11     | Research participation . . . . .           | 30        |

# 1 Question 1

## 1.1 Overall



## 1.2 Gender

Factors considered to influence brain health  
by gender



Question 1 asked respondents to rate on a 5-level likert-scale how strongly different life periods influence brain health. Here divided by respondent gender. Categories with less than 20% of the responses do not have percentages shown. Subplots are ordered by total rated importance across all groups. The number of male and female respondents differ between subplots due to missing answers.

### 1.3 Age groups

#### Factors considered to influence brain health by age groups



Question 1 asked respondents to rate on a 5-level likert-scale how strongly different life periods influence brain health. Here divided by respondent age group. Categories with less than 20% of the responses do not have percentages shown. Subplots are ordered by total rated importance across all groups

### 1.4 Education

Factors considered to influence brain health by educational level



Question 1 asked respondents to rate on a 5-level likert-scale how strongly different life periods influence brain health. Here divided by respondent self-reported education level. Categories with less than 20% of the responses do not have percentages shown. Subplots are ordered by total rated importance across all groups

## 1.5 Country

### Factors considered to influence brain health by country of residence



Question 1 asked respondents to rate on a 5-level likert-scale how strongly different life periods influence brain health. Here divided by respondent self-reported country of residence, showing the 7 with the most responses while all other countries are represented in 'Other'. Categories with less than 20% of the responses do not have percentages shown. Subplots are ordered by total rated importance across all groups



## 1.6 Health experience/education

### Factors considered to influence brain health

By reported education or work experience in health care



Question 1 asked respondents to rate on a 5-level likert-scale how strongly different life periods influence brain health. Here divided by having education or work experience in health care. Categories with less than 20% of the responses do not have percentages shown.

### 1.7 Cognitive health

Factors considered to influence brain health  
by self-reported rating of cognitive health



Question 1 asked respondents to rate on a 5-level likert-scale how strongly different life periods influence brain health. Here divided by self-reported rating of cognitive health. Categories with less than 20% of the responses do not have percentages shown.

## 1.8 Mental health

Factors considered to influence brain health  
by self-reported rating of mental health



Question 1 asked respondents to rate on a 5-level likert-scale how strongly different life periods influence brain health. Here divided by self-reported rating of mental health. Categories with less than 20% of the responses do not have percentages shown.

### 1.9 Illness

#### Factors considered to influence brain health

by experience of long-standing illness, disability, or health problem

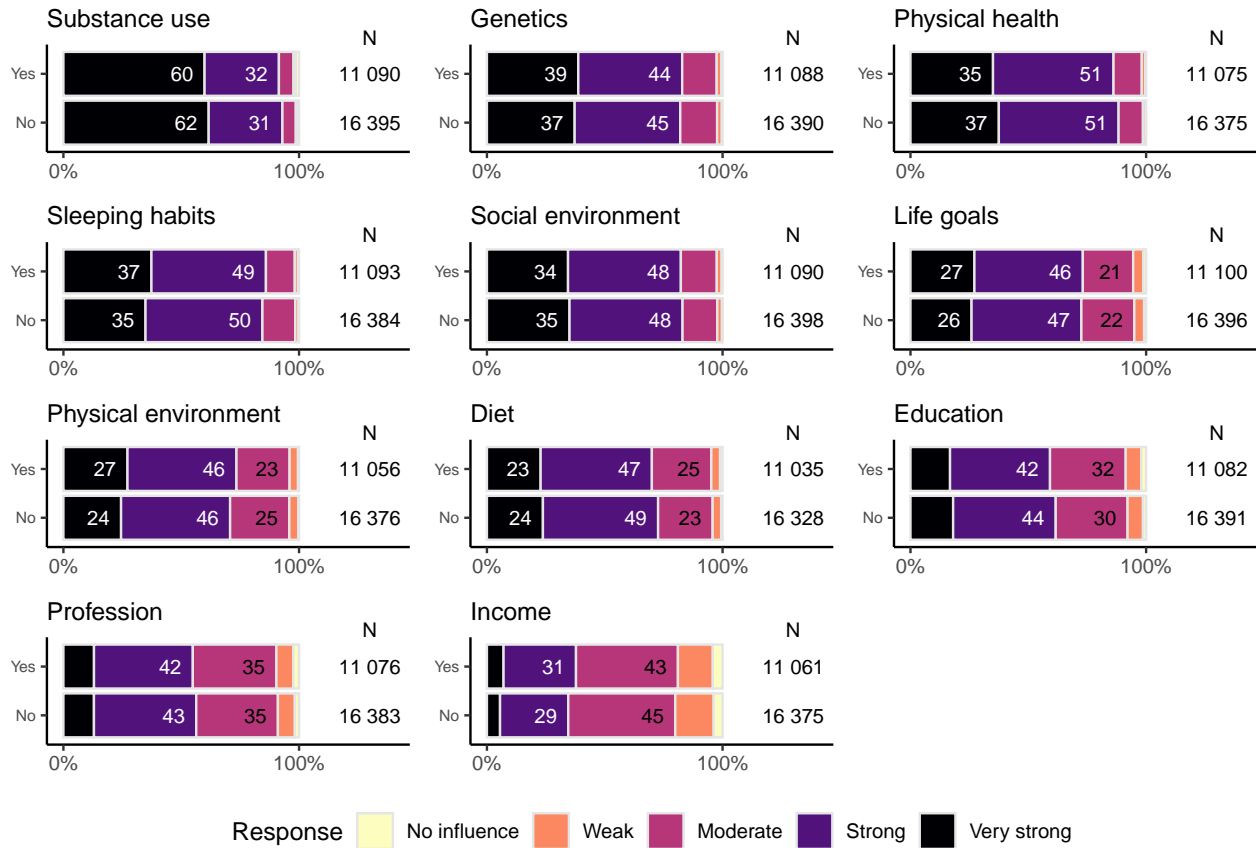

Question 1 asked respondents to rate on a 5-level likert-scale how strongly different life periods influence brain health. Here divided whether they had experience with long-standing illness, disability, or health problem. Categories with less than 20% of the responses do not have percentages shown.

Only

### 1.10 Brain disease care

#### Factors considered to influence brain health

by experience of taking care of family member with brain disease



Question 1 asked respondents to rate on a 5-level likert-scale how strongly different life periods influence brain health. Here divided whether they had experience with looking after a member of family with brain disease. Categories with less than 20% of the responses do not have percentages shown.

Only

### 1.11 Research participation

#### Factors considered to influence brain health

By experience of brain research participation



Question 1 asked respondents to rate on a 5-level likert-scale how strongly different life periods influence brain health. Here divided whether they have participated in brain research projects. Categories with less than 20% of the responses do not have percentages shown.

Only

## 2 Question 2

### 2.1 Overall



### 2.2 Gender

Life periods to look after ones... brain  
by gender



Question 2 asked respondents to rate on a 4...level scale at which life stages it is important to look after one's brain health. In the womb (before birth); Childhood (0–12 years); Adolescence (13–18 years); Young adulthood (19...45 years); Middle age (45–65 years); Old age (over 65 years) Here divided by respondent gender. Categories with less than 20% of the responses do not have percentages shown. Subplots are ordered by total rated importance across all groups. The number of male and female respondents differ between subplots due to missing answers.

### 2.3 Age groups

Life periods to look after ones... brain  
by age groups

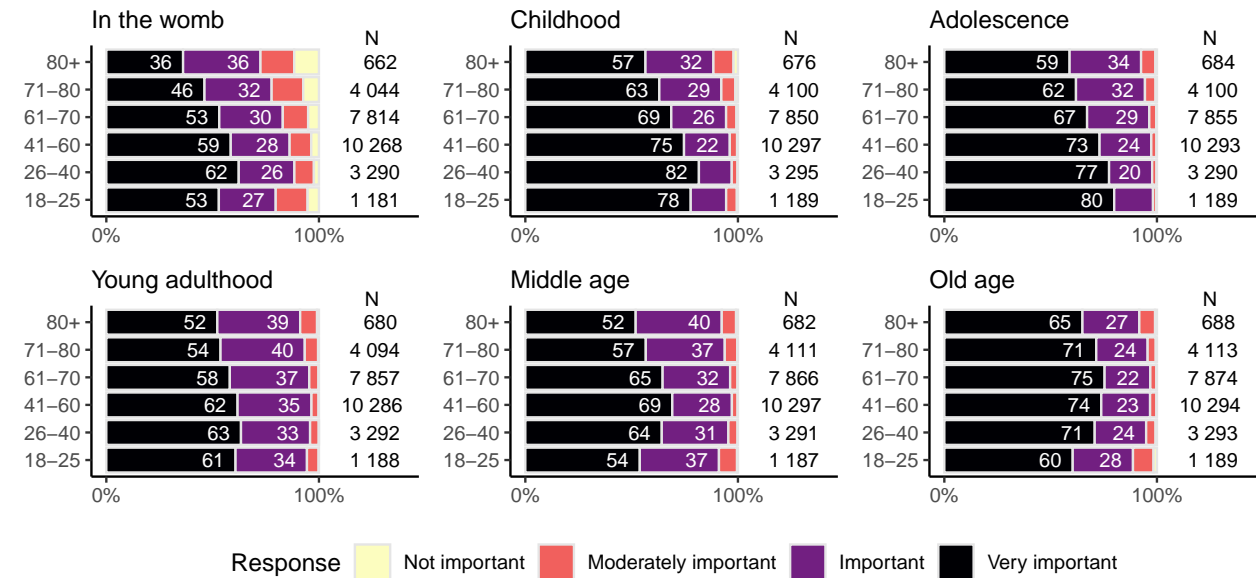

Question 2 asked respondents to rate on a 4...level scale at which life stages it is important to look after one's brain health. In the womb (before birth); Childhood (0-12 years); Adolescence (13-18 years); Young adulthood (19...45 years); Middle age (45-65 years); Old age (over 65 years) Here divided by respondent age group. Categories with less than 20% of the responses do not have percentages shown. Subplots are ordered by total rated importance across all groups

### 2.4 Education

Life periods to look after ones... brain  
by educational level

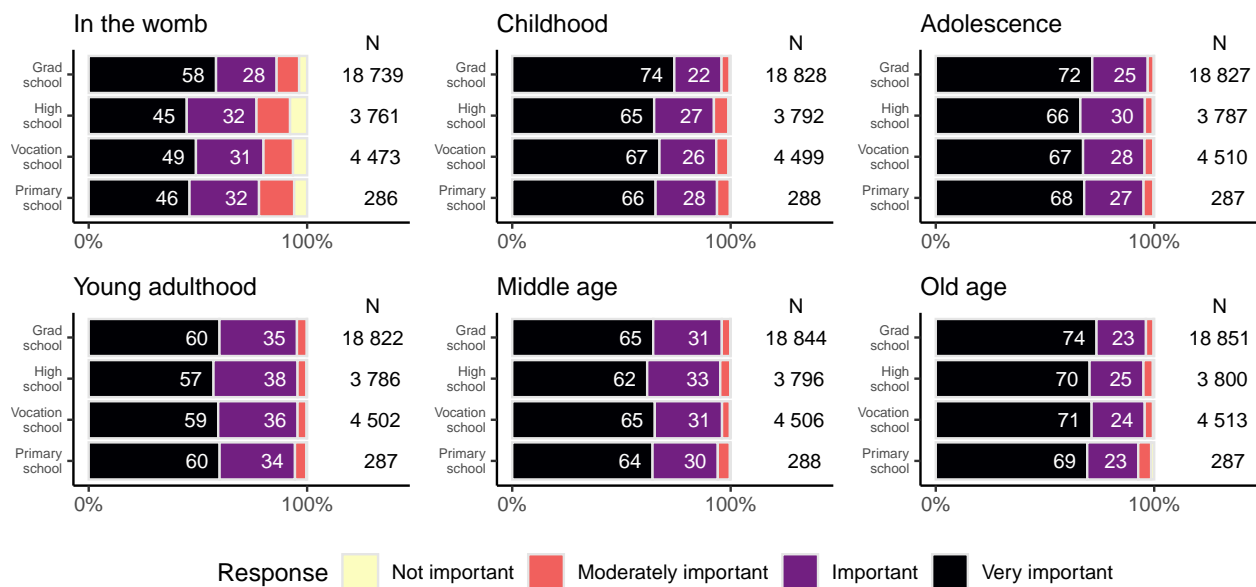

Question 2 asked respondents to rate on a 4...level scale at which life stages it is important to look after one's brain health. In the womb (before birth); Childhood (0-12 years); Adolescence (13-18 years); Young adulthood (19...45 years); Middle age (45-65 years); Old age (over 65 years) Here divided by respondent self-reported educational level. Categories with less than 20% of the responses do not have percentages shown. Subplots are ordered by total rated importance across all groups



## 2.5 Country

Life periods to look after ones... brain  
by country of residence



Question 2 asked respondents to rate on a 4...level scale at which life stages it is important to look after one's brain health. In the womb (before birth); Childhood (0–12 years); Adolescence (13–18 years); Young adulthood (19...45 years); Middle age (45–65 years); Old age (over 65 years) Here divided by respondent self-reported country of residence, showing the 7 with the most responses while all other countries are represented in 'Other'. Categories with less than 20% of the responses do not have percentages shown. Subplots are ordered by total rated importance across all groups

## 2.6 Health experience/education

### Life periods to look after ones... brain

By reported education or work experience in health care



Question 2 asked respondents to rate on a 4...level scale at which life stages it is important to look after one's brain health. In the womb (before birth); Childhood (0–12 years); Adolescence (13–18 years); Young adulthood (19...45 years); Middle age (45–65 years); Old age (over 65 years) Here divided by having education or work experience in health care. Categories with less than 20% of the responses do not have percentages shown.

Review only

## 2.7 Cognitive health

Life periods to look after ones... brain  
by self-reported rating of cognitive health



Question 2 asked respondents to rate on a 4...level scale at which life stages it is important to look after one's brain health. In the womb (before birth); Childhood (0–12 years); Adolescence (13–18 years); Young adulthood (19...45 years); Middle age (45–65 years); Old age (over 65 years) Here divided by self-reported rating of cognitive health. Categories with less than 20% of the responses do not have percentages shown.

## 2.8 Mental health

Life periods to look after ones... brain  
by self-reported rating of mental health

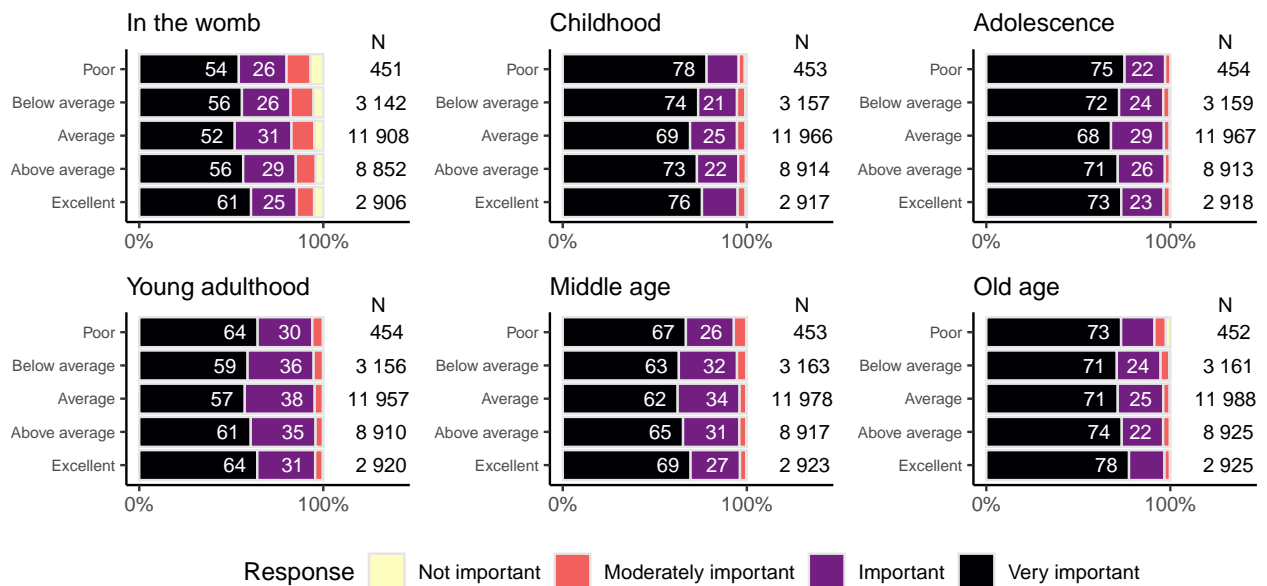

Question 2 asked respondents to rate on a 4...level scale at which life stages it is important to look after one's brain health. In the womb (before birth); Childhood (0–12 years); Adolescence (13–18 years); Young adulthood (19...45 years); Middle age (45–65 years); Old age (over 65 years) Here divided by self-reported rating of mental health. Categories with less than 20% of the responses do not have percentages shown.

## 2.9 Illness

### Life periods to look after ones... brain

by experience of long-standing illness, disability, or health problem



Question 2 asked respondents to rate on a 4...level scale at which life stages it is important to look after one's brain health. In the womb (before birth); Childhood (0–12 years); Adolescence (13–18 years); Young adulthood (19...45 years); Middle age (45–65 years); Old age (over 65 years) Here divided whether they had experience with long-standing illness, disability, or health problem. Categories with less than 20% of the responses do not have percentages shown.

## 2.10 Brain disease care

### Life periods to look after ones... brain

by experience of taking care of family member with brain disease



Question 2 asked respondents to rate on a 4...level scale at which life stages it is important to look after one's brain health. In the womb (before birth); Childhood (0–12 years); Adolescence (13–18 years); Young adulthood (19...45 years); Middle age (45–65 years); Old age (over 65 years) Here divided whether they had experience with looking after a member of family with brain disease. Categories with less than 20% of the responses do not have percentages shown.

## 2.11 Research participation

### Life periods to look after ones... brain

By experience of brain research participation



Question 2 asked respondents to rate on a 4...level scale at which life stages it is important to look after one's brain health. In the womb (before birth); Childhood (0–12 years); Adolescence (13–18 years); Young adulthood (19...45 years); Middle age (45–65 years); Old age (over 65 years) Here divided whether they have participated in brain research projects. Categories with less than 20% of the responses do not have percentages shown.

### 3 Question 3

#### 3.1 Overall

Diseases/disorders associated with the brain



Respondents were given the option to tick boxes with the diseases presented above to indicate which ones they associated with the brain. They were allowed to select as many categories as they wished. The question was optional, and as such we present data from the 27 530 who responded to the question. We do not know if those who refrained from responding did so because they did not associate any of the diseases with the brain, or if they simply did not wish to respond.

### 3.2 Gender

Diseases/disorders associated with the brain  
by gender

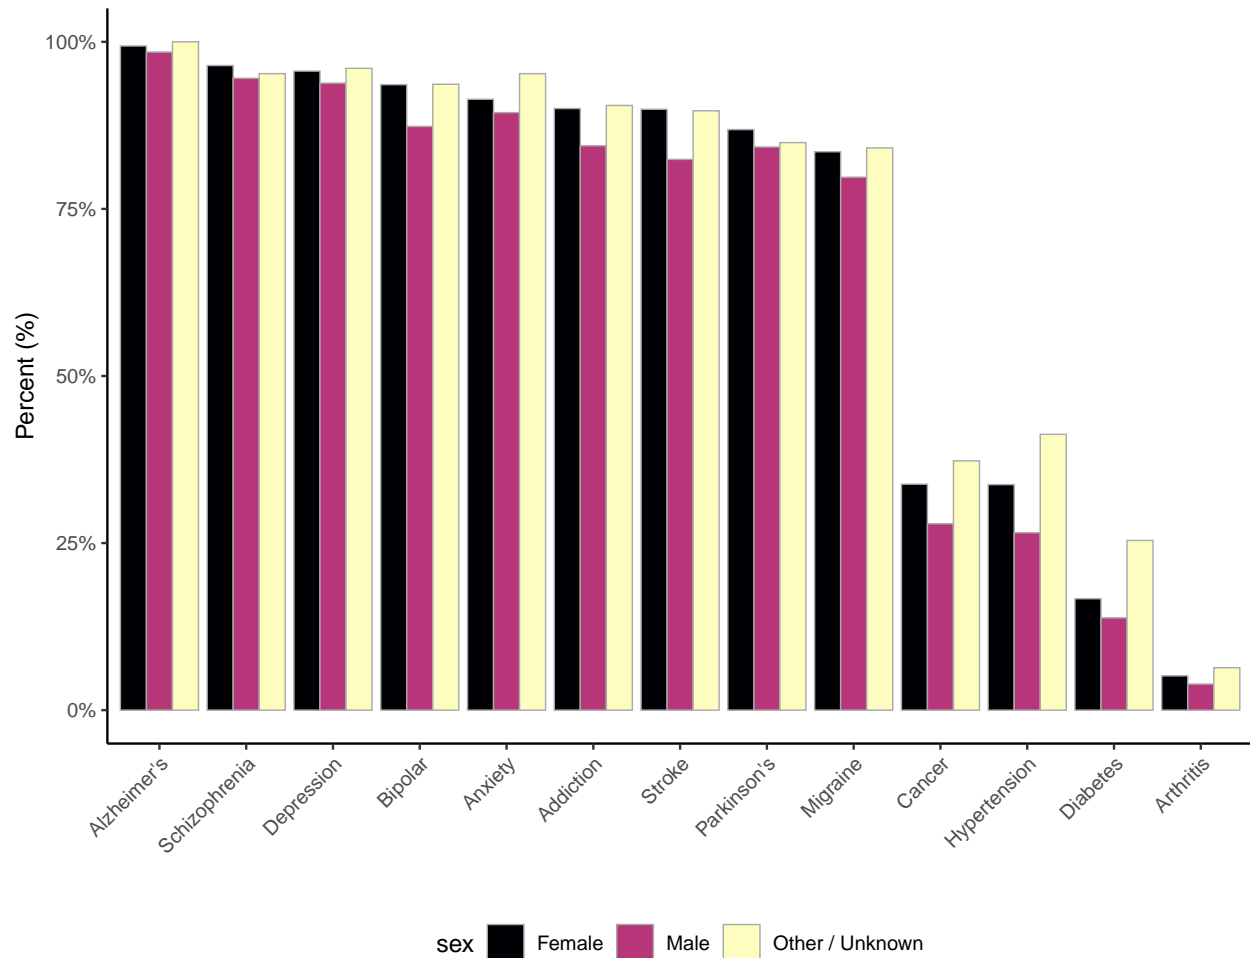

Respondents were given the option to tick boxes with the diseases presented above to indicate which ones they associated with the brain. They were allowed to select as many categories as they wished. The question was optional, and as such we present data from the 27 530 who responded to the question. We do not know if those who refrained from responding did so because they did not associate any of the diseases with the brain, or if they simply did not wish to respond. The number of male and female respondents differ between subplots due to missing answers.

### 3.3 Age groups

Diseases/disorders associated with the brain  
by age groups



Respondents were given the option to tick boxes with the diseases presented above to indicate which ones they associated with the brain. They were allowed to select as many categories as they wished. The question was optional, and as such we present data from the 27 530 who responded to the question. We do not know if those who refrained from responding did so because they did not associate any of the diseases with the brain, or if they simply did not wish to respond.



### 3.4 Education

Diseases/disorders associated with the brain  
by education level

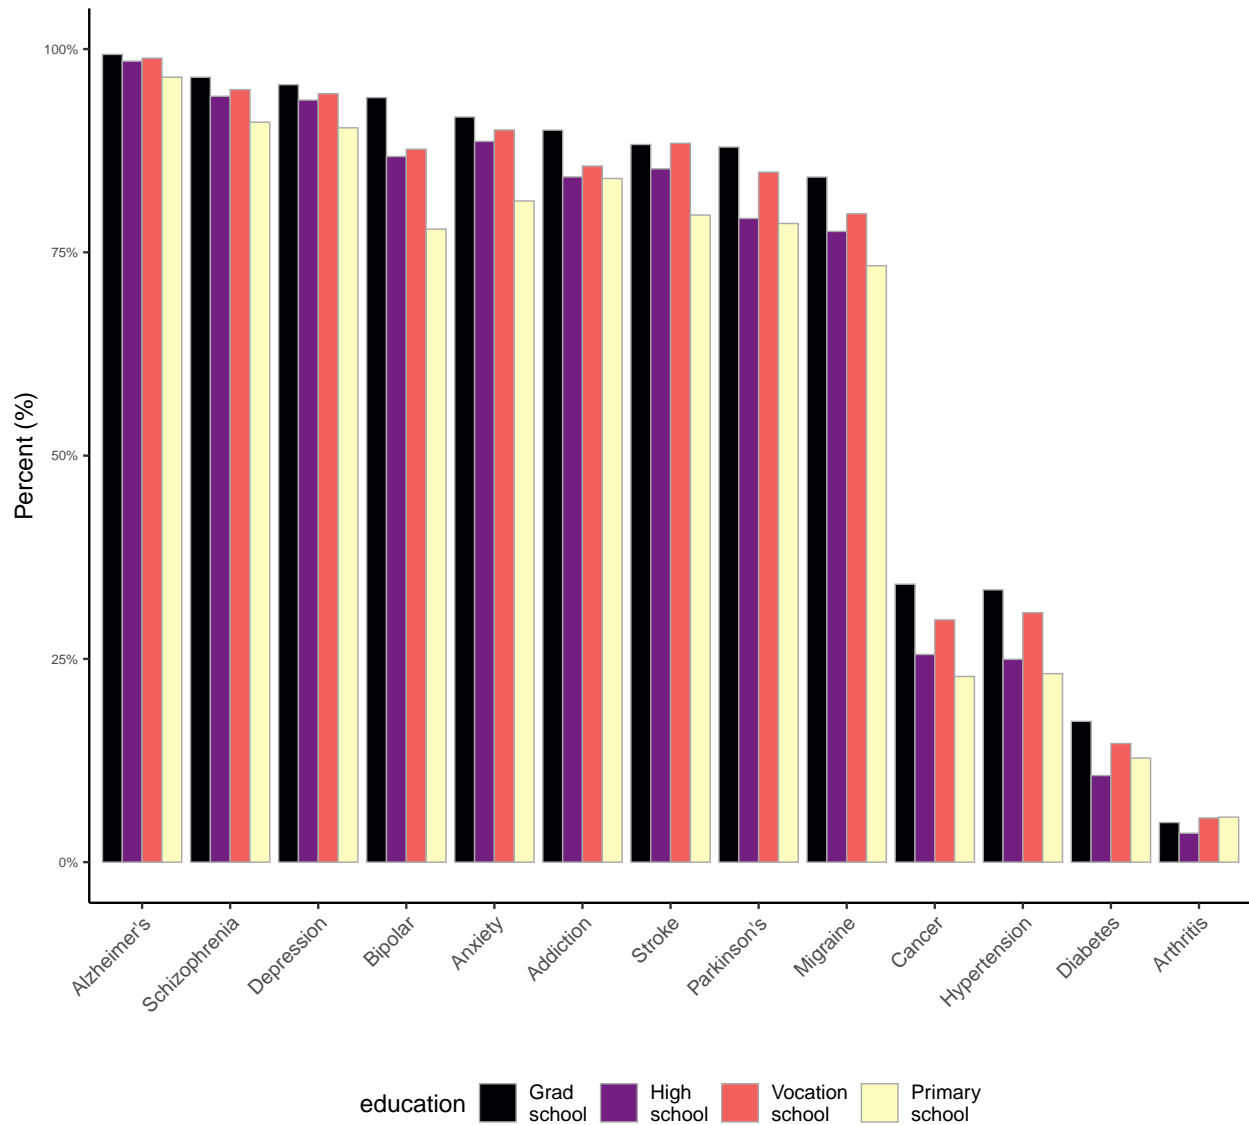

Respondents were given the option to tick boxes with the diseases presented above to indicate which ones they associated with the brain. They were allowed to select as many categories as they wished. The question was optional, and as such we present data from the 27 530 who responded to the question. We do not know if those who refrained from responding did so because they did not associate any of the diseases with the brain, or if they simply did not wish to respond. Percentages are added to clarify how large a porportion of the respondents associated the diseases with the brain.

### 3.5 Country

Diseases/disorders associated with the brain  
by country of residence



Respondents were given the option to tick boxes with the diseases presented above to indicate which ones they associated with the brain. They were allowed to select as many categories as they wished. The question was optional, and as such we present data from the 27 530 who responded to the question. We do not know if those who refrained from responding did so because they did not associate any of the diseases with the brain, or if they simply did not wish to respond.

Only

### 3.6 Health care experience/education

#### Diseases/disorders associated with the brain

by reported education or work experience in health care...



Respondents were given the option to tick boxes with the diseases presented above to indicate which ones they associated with the brain. They were allowed to select as many categories as they wished. The question was optional, and as such we present data from the 27 530 who responded to the question. We do not know if those who refrained from responding did so because they did not associate any of the diseases with the brain, or if they simply did not wish to respond.

### 3.7 Cognitive health

Diseases/disorders associated with the brain  
by self-rated cognitive health



Respondents were given the option to tick boxes with the diseases presented above to indicate which ones they associated with the brain. They were allowed to select as many categories as they wished. The question was optional, and as such we present data from the 27 530 who responded to the question. We do not know if those who refrained from responding did so because they did not associate any of the diseases with the brain, or if they simply did not wish to respond.

### 3.8 Mental health

Diseases/disorders associated with the brain  
by self-rated mental health



Respondents were given the option to tick boxes with the diseases presented above to indicate which ones they associated with the brain. They were allowed to select as many categories as they wished. The question was optional, and as such we present data from the 27 530 who responded to the question. We do not know if those who refrained from responding did so because they did not associate any of the diseases with the brain, or if they simply did not wish to respond.

### 3.9 Illness

#### Diseases/disorders associated with the brain

by experience of long-standing illness, disability or health problem

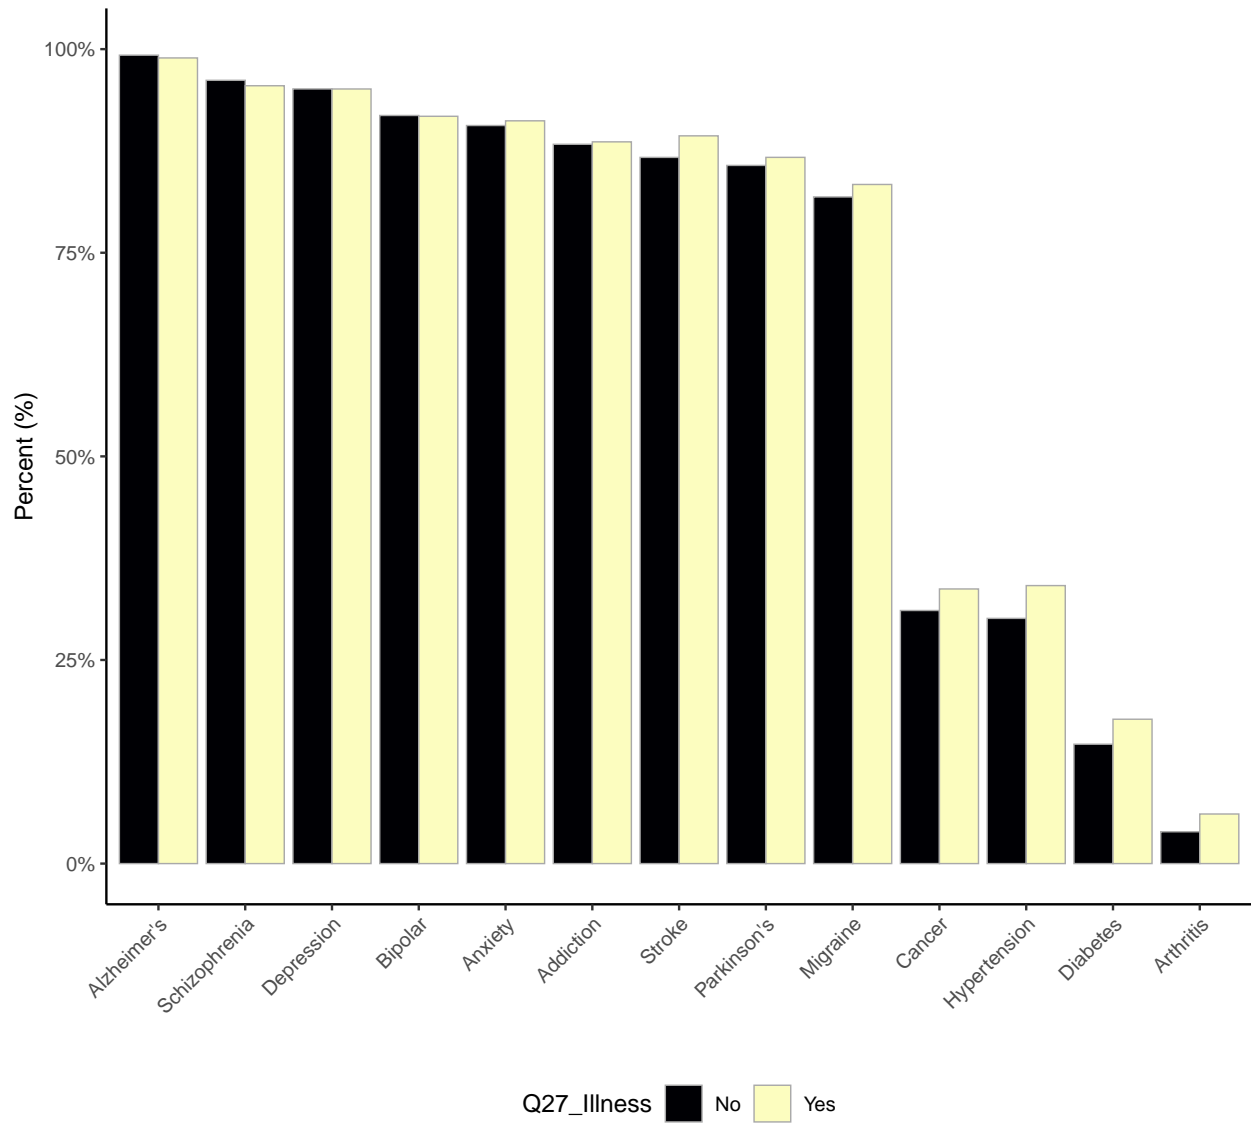

Respondents were given the option to tick boxes with the diseases presented above to indicate which ones they associated with the brain. They were allowed to select as many categories as they wished. The question was optional, and as such we present data from the 27 530 who responded to the question. We do not know if those who refrained from responding did so because they did not associate any of the diseases with the brain, or if they simply did not wish to respond. Here divided whether they had experience with long-standing illness, disability, or health problem.

### 3.10 Brain disease care

#### Ratings of factors influencing brain health

by experience of taking care of family member with brain disease

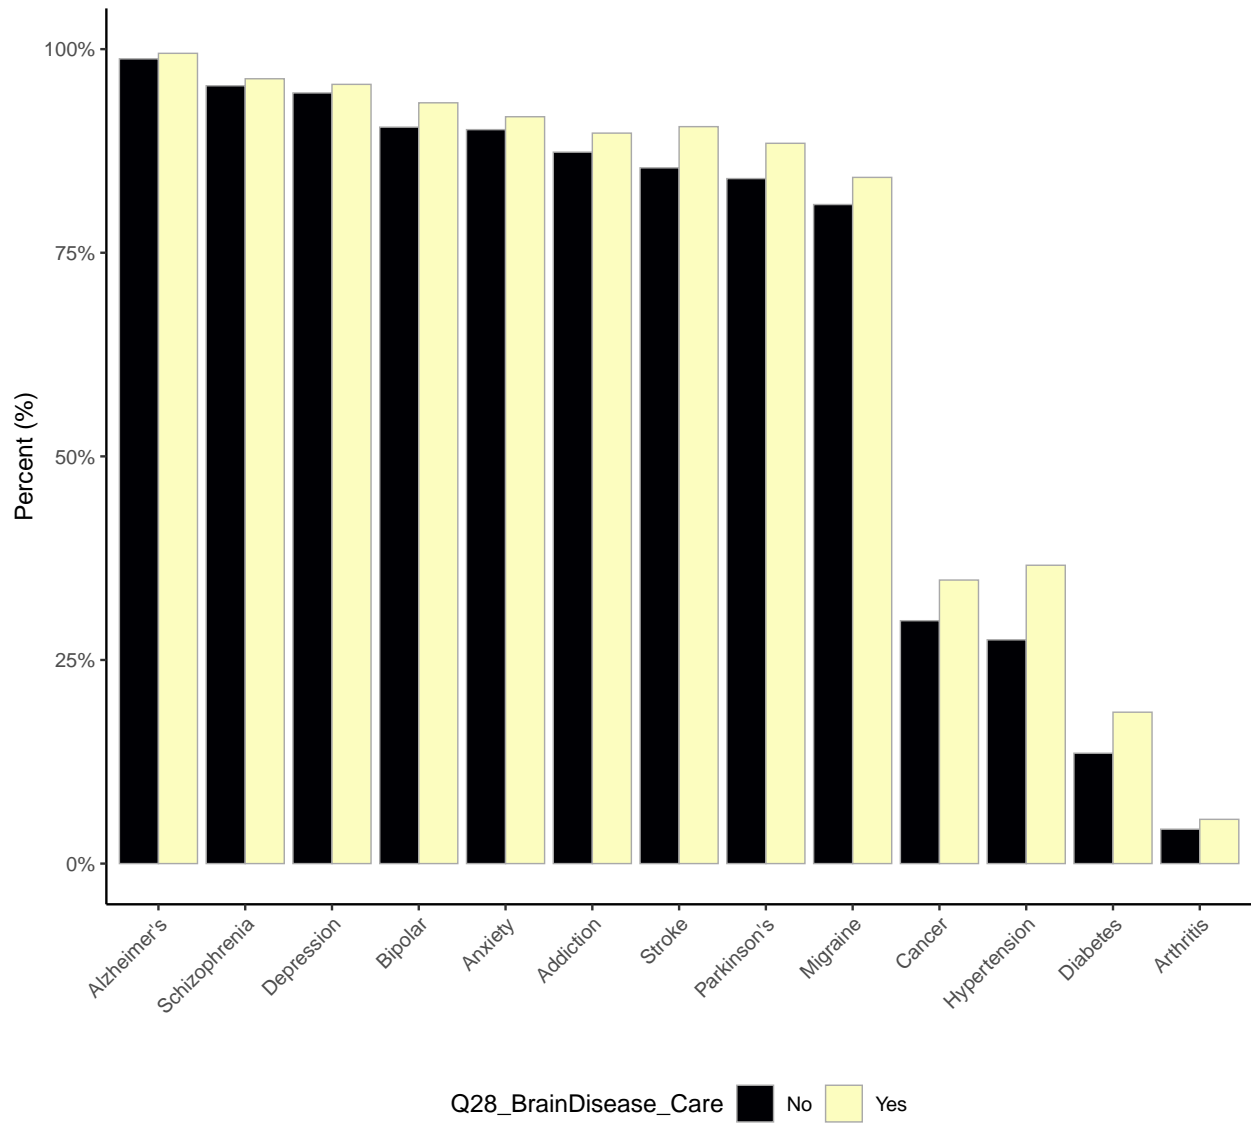

Respondents were given the option to tick boxes with the diseases presented above to indicate which ones they associated with the brain. They were allowed to select as many categories as they wished. The question was optional, and as such we present data from the 27 530 who responded to the question. We do not know if those who refrained from responding did so because they did not associate any of the diseases with the brain, or if they simply did not wish to respond. Here divided whether they had experience with looking after a member of family with brain disease.

### 3.11 Research participation

#### Ratings of factors influencing brain health

By experience of brain research participation



Respondents were given the option to tick boxes with the diseases presented above to indicate which ones they associated with the brain. They were allowed to select as many categories as they wished. The question was optional, and as such we present data from the 27 530 who responded to the question. We do not know if those who refrained from responding did so because they did not associate any of the diseases with the brain, or if they simply did not wish to respond. Here divided whether they have participated in brain research projects.



# Lifefrain Global Brain Health Survey

## Supplementary tables

### Contents

|          |                                               |          |
|----------|-----------------------------------------------|----------|
| <b>1</b> | <b>Question 1</b>                             | <b>3</b> |
| 1.1      | continuous                                    | 4        |
| 1.1.1    | Question 1: continuous - Income               | 5        |
| 1.1.2    | Question 1: continuous - Profession           | 6        |
| 1.1.3    | Question 1: continuous - Education            | 7        |
| 1.1.4    | Question 1: continuous - Diet                 | 8        |
| 1.1.5    | Question 1: continuous - Physical environment | 9        |
| 1.1.6    | Question 1: continuous - Life goals           | 10       |
| 1.1.7    | Question 1: continuous - Social environment   | 11       |
| 1.1.8    | Question 1: continuous - Sleeping habits      | 12       |
| 1.1.9    | Question 1: continuous - Physical health      | 13       |
| 1.1.10   | Question 1: continuous - Genetics             | 14       |
| 1.1.11   | Question 1: continuous - Substance use        | 15       |
| 1.2      | binary                                        | 16       |
| 1.2.1    | Question 1: binary - Income                   | 17       |
| 1.2.2    | Question 1: binary - Profession               | 18       |
| 1.2.3    | Question 1: binary - Education                | 19       |
| 1.2.4    | Question 1: binary - Diet                     | 20       |
| 1.2.5    | Question 1: binary - Physical environment     | 21       |
| 1.2.6    | Question 1: binary - Life goals               | 22       |
| 1.2.7    | Question 1: binary - Social environment       | 23       |
| 1.2.8    | Question 1: binary - Sleeping habits          | 24       |
| 1.2.9    | Question 1: binary - Physical health          | 25       |
| 1.2.10   | Question 1: binary - Genetics                 | 26       |
| 1.2.11   | Question 1: binary - Substance use            | 27       |
| 1.3      | ordinal                                       | 28       |
| 1.3.1    | Question 1: ordinal - Income                  | 30       |
| 1.3.2    | Question 1: ordinal - Profession              | 32       |
| 1.3.3    | Question 1: ordinal - Education               | 34       |
| 1.3.4    | Question 1: ordinal - Diet                    | 36       |
| 1.3.5    | Question 1: ordinal - Physical environment    | 38       |
| 1.3.6    | Question 1: ordinal - Life goals              | 40       |
| 1.3.7    | Question 1: ordinal - Social environment      | 42       |
| 1.3.8    | Question 1: ordinal - Sleeping habits         | 44       |
| 1.3.9    | Question 1: ordinal - Physical health         | 46       |
| 1.3.10   | Question 1: ordinal - Genetics                | 48       |
| 1.3.11   | Question 1: ordinal - Substance use           | 50       |
| 1.4      | bin_vs_cont                                   | 51       |
| 1.4.1    | Question 1: bin_vs_cont - Income              | 52       |
| 1.4.2    | Question 1: bin_vs_cont - Profession          | 53       |
| 1.4.3    | Question 1: bin_vs_cont - Education           | 54       |
| 1.4.4    | Question 1: bin_vs_cont - Diet                | 55       |

|    |          |                                                             |
|----|----------|-------------------------------------------------------------|
| 1  |          |                                                             |
| 2  |          |                                                             |
| 3  | 1.4.5    | Question 1: bin_vs_cont - Physical environment . . . . . 56 |
| 4  | 1.4.6    | Question 1: bin_vs_cont - Life goals . . . . . 57           |
| 5  | 1.4.7    | Question 1: bin_vs_cont - Social environment . . . . . 58   |
| 6  | 1.4.8    | Question 1: bin_vs_cont - Sleeping habits . . . . . 59      |
| 7  | 1.4.9    | Question 1: bin_vs_cont - Physical health . . . . . 60      |
| 8  | 1.4.10   | Question 1: bin_vs_cont - Genetics . . . . . 61             |
| 9  | 1.4.11   | Question 1: bin_vs_cont - Substance use . . . . . 62        |
| 10 |          |                                                             |
| 11 | <b>2</b> | <b>Question 2 . . . . . 64</b>                              |
| 12 | 2.1      | continuous . . . . . 64                                     |
| 13 | 2.1.1    | Question 2: continuous - In the womb . . . . . 65           |
| 14 | 2.1.2    | Question 2: continuous - Childhood . . . . . 66             |
| 15 | 2.1.3    | Question 2: continuous - Adolescence . . . . . 67           |
| 16 | 2.1.4    | Question 2: continuous - Young adulthood . . . . . 68       |
| 17 | 2.1.5    | Question 2: continuous - Middle age . . . . . 69            |
| 18 | 2.1.6    | Question 2: continuous - Old age . . . . . 70               |
| 19 | 2.2      | binary . . . . . 70                                         |
| 20 | 2.2.1    | Question 2: binary - In the womb . . . . . 71               |
| 21 | 2.2.2    | Question 2: binary - Childhood . . . . . 72                 |
| 22 | 2.2.3    | Question 2: binary - Adolescence . . . . . 73               |
| 23 | 2.2.4    | Question 2: binary - Young adulthood . . . . . 74           |
| 24 | 2.2.5    | Question 2: binary - Middle age . . . . . 75                |
| 25 | 2.2.6    | Question 2: binary - Old age . . . . . 76                   |
| 26 | 2.3      | ordinal . . . . . 76                                        |
| 27 | 2.3.1    | Question 2: ordinal - In the womb . . . . . 78              |
| 28 | 2.3.2    | Question 2: ordinal - Childhood . . . . . 80                |
| 29 | 2.3.3    | Question 2: ordinal - Adolescence . . . . . 82              |
| 30 | 2.3.4    | Question 2: ordinal - Young adulthood . . . . . 84          |
| 31 | 2.3.5    | Question 2: ordinal - Middle age . . . . . 86               |
| 32 | 2.3.6    | Question 2: ordinal - Old age . . . . . 88                  |
| 33 | 2.4      | bin_vs_cont . . . . . 89                                    |
| 34 | 2.4.1    | Question 2: bin_vs_cont - In the womb . . . . . 90          |
| 35 | 2.4.2    | Question 2: bin_vs_cont - Childhood . . . . . 91            |
| 36 | 2.4.3    | Question 2: bin_vs_cont - Adolescence . . . . . 92          |
| 37 | 2.4.4    | Question 2: bin_vs_cont - Young adulthood . . . . . 93      |
| 38 | 2.4.5    | Question 2: bin_vs_cont - Middle age . . . . . 94           |
| 39 | 2.4.6    | Question 2: bin_vs_cont - Old age . . . . . 95              |
| 40 |          |                                                             |
| 41 | <b>3</b> | <b>Question 3 . . . . . 97</b>                              |
| 42 | 3.1      | binary . . . . . 97                                         |
| 43 | 3.1.1    | Question 3: binary - Alzheimer's . . . . . 98               |
| 44 | 3.1.2    | Question 3: binary - Schizophrenia . . . . . 99             |
| 45 | 3.1.3    | Question 3: binary - Depression . . . . . 100               |
| 46 | 3.1.4    | Question 3: binary - Bipolar . . . . . 101                  |
| 47 | 3.1.5    | Question 3: binary - Anxiety . . . . . 102                  |
| 48 | 3.1.6    | Question 3: binary - Addiction . . . . . 103                |
| 49 | 3.1.7    | Question 3: binary - Stroke . . . . . 104                   |
| 50 | 3.1.8    | Question 3: binary - Parkinson's . . . . . 105              |
| 51 | 3.1.9    | Question 3: binary - Migraine . . . . . 106                 |
| 52 | 3.1.10   | Question 3: binary - Cancer . . . . . 107                   |
| 53 | 3.1.11   | Question 3: binary - Hypertension . . . . . 108             |
| 54 | 3.1.12   | Question 3: binary - Diabetes . . . . . 109                 |
| 55 | 3.1.13   | Question 3: binary - Arthritis . . . . . 110                |
| 56 |          |                                                             |
| 57 |          |                                                             |
| 58 |          |                                                             |
| 59 |          |                                                             |
| 60 |          |                                                             |

1  
2  
3  
4  
5  
6  
7  
8  
9  
10  
11  
12  
13  
14  
15  
16  
17  
18  
19  
20  
21  
22  
23  
24  
25  
26  
27  
28  
29  
30  
31  
32  
33  
34  
35  
36  
37  
38  
39  
40  
41  
42  
43  
44  
45  
46  
47  
48  
49  
50  
51  
52  
53  
54  
55  
56  
57  
58  
59  
60

**1 Question 1**

For peer review only

1  
2  
3 **1.1 continuous**  
4  
5  
6  
7  
8  
9  
10  
11  
12  
13  
14  
15  
16  
17  
18  
19  
20  
21  
22  
23  
24  
25  
26  
27  
28  
29  
30  
31  
32  
33  
34  
35  
36  
37  
38  
39  
40  
41  
42  
43  
44  
45  
46  
47  
48  
49  
50  
51  
52  
53  
54  
55  
56  
57  
58  
59  
60

For peer review only

## 1.1.1 Question 1: continuous - Income

| fct                          | term              | estimate | std.error | statistic | p.value |
|------------------------------|-------------------|----------|-----------|-----------|---------|
|                              | (Intercept)       | 2.79     | 0.01      | 346.28    | 0.00    |
| age                          | 41-60             | 0.02     | 0.01      | 1.34      | 0.18    |
|                              | <= 40             | 0.13     | 0.02      | 8.24      | 0.00    |
| education                    | (Intercept)       | 2.83     | 0.01      | 427.49    | 0.00    |
|                              | Lower             | -0.03    | 0.01      | -2.85     | 0.00    |
| gender                       | (Intercept)       | 2.80     | 0.01      | 431.20    | 0.00    |
|                              | Man               | 0.06     | 0.01      | 5.03      | 0.00    |
|                              | Other/Undisclosed | -0.10    | 0.08      | -1.21     | 0.23    |
| healthcare_experience        | (Intercept)       | 2.87     | 0.01      | 411.84    | 0.00    |
|                              | Yes               | -0.14    | 0.01      | -12.62    | 0.00    |
| cognitive_health             | (Intercept)       | 2.81     | 0.01      | 497.69    | 0.00    |
|                              | Below average     | 0.06     | 0.02      | 2.64      | 0.01    |
| mental_health                | (Intercept)       | 2.81     | 0.01      | 478.30    | 0.00    |
|                              | Below average     | 0.03     | 0.02      | 1.74      | 0.08    |
| illness_experience           | (Intercept)       | 2.84     | 0.01      | 400.38    | 0.00    |
|                              | Yes               | -0.06    | 0.01      | -4.95     | 0.00    |
| brain_disease_caregiver      | (Intercept)       | 2.82     | 0.01      | 376.99    | 0.00    |
|                              | Yes               | -0.02    | 0.01      | -1.46     | 0.14    |
| brain_research_participation | (Intercept)       | 2.83     | 0.01      | 388.69    | 0.00    |
|                              | Yes               | -0.02    | 0.01      | -2.12     | 0.03    |
| relationship                 | (Intercept)       | 2.82     | 0.01      | 341.26    | 0.00    |
|                              | Stable            | 0.00     | 0.01      | -0.09     | 0.93    |

## 1.1.2 Question 1: continuous - Profession

| fct                          | term              | estimate | std.error | statistic | p.value |
|------------------------------|-------------------|----------|-----------|-----------|---------|
|                              | (Intercept)       | 2.49     | 0.01      | 320.24    | 0.00    |
| age                          | 41-60             | -0.09    | 0.01      | -7.52     | 0.00    |
|                              | <= 40             | -0.19    | 0.02      | -12.39    | 0.00    |
| education                    | (Intercept)       | 2.38     | 0.01      | 373.25    | 0.00    |
|                              | Lower             | 0.15     | 0.01      | 13.31     | 0.00    |
| gender                       | (Intercept)       | 2.44     | 0.01      | 388.72    | 0.00    |
|                              | Man               | -0.05    | 0.01      | -4.27     | 0.00    |
|                              | Other/Undisclosed | 0.01     | 0.08      | 0.12      | 0.90    |
| healthcare_experience        | (Intercept)       | 2.47     | 0.01      | 365.74    | 0.00    |
|                              | Yes               | -0.11    | 0.01      | -10.03    | 0.00    |
| cognitive_health             | (Intercept)       | 2.42     | 0.01      | 442.80    | 0.00    |
|                              | Below average     | 0.14     | 0.02      | 6.08      | 0.00    |
| mental_health                | (Intercept)       | 2.42     | 0.01      | 425.73    | 0.00    |
|                              | Below average     | 0.05     | 0.02      | 3.07      | 0.00    |
| illness_experience           | (Intercept)       | 2.41     | 0.01      | 352.17    | 0.00    |
|                              | Yes               | 0.03     | 0.01      | 2.52      | 0.01    |
| brain_disease_caregiver      | (Intercept)       | 2.39     | 0.01      | 330.81    | 0.00    |
|                              | Yes               | 0.07     | 0.01      | 6.30      | 0.00    |
| brain_research_participation | (Intercept)       | 2.40     | 0.01      | 341.07    | 0.00    |
|                              | Yes               | 0.07     | 0.01      | 6.48      | 0.00    |
| relationship                 | (Intercept)       | 2.41     | 0.01      | 302.34    | 0.00    |
|                              | Stable            | 0.03     | 0.01      | 2.38      | 0.02    |

## 1.1.3 Question 1: continuous - Education

| fct                          | term              | estimate | std.error | statistic | p.value |
|------------------------------|-------------------|----------|-----------|-----------|---------|
|                              | (Intercept)       | 2.33     | 0.01      | 294.00    | 0.00    |
| age                          | 41-60             | 0.02     | 0.01      | 1.55      | 0.12    |
|                              | <= 40             | -0.11    | 0.02      | -6.88     | 0.00    |
| education                    | (Intercept)       | 2.24     | 0.01      | 347.77    | 0.00    |
|                              | Lower             | 0.23     | 0.01      | 20.40     | 0.00    |
| gender                       | (Intercept)       | 2.32     | 0.01      | 364.35    | 0.00    |
|                              | Man               | -0.03    | 0.01      | -2.60     | 0.01    |
|                              | Other/Undisclosed | -0.03    | 0.08      | -0.32     | 0.75    |
| healthcare_experience        | (Intercept)       | 2.37     | 0.01      | 346.73    | 0.00    |
|                              | Yes               | -0.15    | 0.01      | -13.63    | 0.00    |
| cognitive_health             | (Intercept)       | 2.30     | 0.01      | 415.46    | 0.00    |
|                              | Below average     | 0.22     | 0.02      | 9.50      | 0.00    |
| mental_health                | (Intercept)       | 2.30     | 0.01      | 398.10    | 0.00    |
|                              | Below average     | 0.15     | 0.02      | 9.54      | 0.00    |
| illness_experience           | (Intercept)       | 2.29     | 0.01      | 329.40    | 0.00    |
|                              | Yes               | 0.05     | 0.01      | 4.79      | 0.00    |
| brain_disease_caregiver      | (Intercept)       | 2.30     | 0.01      | 312.05    | 0.00    |
|                              | Yes               | 0.04     | 0.01      | 3.97      | 0.00    |
| brain_research_participation | (Intercept)       | 2.31     | 0.01      | 323.58    | 0.00    |
|                              | Yes               | 0.01     | 0.01      | 1.08      | 0.28    |
| relationship                 | (Intercept)       | 2.31     | 0.01      | 285.57    | 0.00    |
|                              | Stable            | 0.00     | 0.01      | 0.14      | 0.89    |

## 1.1.4 Question 1: continuous - Diet

| fct                          | term              | estimate | std.error | statistic | p.value |
|------------------------------|-------------------|----------|-----------|-----------|---------|
|                              | (Intercept)       | 2.21     | 0.01      | 303.94    | 0.00    |
| age                          | 41-60             | -0.19    | 0.01      | -17.83    | 0.00    |
|                              | <= 40             | -0.24    | 0.01      | -16.58    | 0.00    |
| education                    | (Intercept)       | 2.07     | 0.01      | 344.18    | 0.00    |
|                              | Lower             | 0.12     | 0.01      | 11.01     | 0.00    |
| gender                       | (Intercept)       | 2.06     | 0.01      | 350.17    | 0.00    |
|                              | Man               | 0.14     | 0.01      | 12.65     | 0.00    |
|                              | Other/Undisclosed | -0.05    | 0.07      | -0.65     | 0.51    |
| healthcare_experience        | (Intercept)       | 2.16     | 0.01      | 340.55    | 0.00    |
|                              | Yes               | -0.14    | 0.01      | -14.09    | 0.00    |
| cognitive_health             | (Intercept)       | 2.09     | 0.01      | 407.41    | 0.00    |
|                              | Below average     | 0.18     | 0.02      | 8.69      | 0.00    |
| mental_health                | (Intercept)       | 2.09     | 0.01      | 391.07    | 0.00    |
|                              | Below average     | 0.09     | 0.01      | 5.98      | 0.00    |
| illness_experience           | (Intercept)       | 2.08     | 0.01      | 323.06    | 0.00    |
|                              | Yes               | 0.05     | 0.01      | 4.56      | 0.00    |
| brain_disease_caregiver      | (Intercept)       | 2.14     | 0.01      | 313.75    | 0.00    |
|                              | Yes               | -0.07    | 0.01      | -7.35     | 0.00    |
| brain_research_participation | (Intercept)       | 2.11     | 0.01      | 319.29    | 0.00    |
|                              | Yes               | -0.02    | 0.01      | -2.02     | 0.04    |
| relationship                 | (Intercept)       | 2.09     | 0.01      | 278.30    | 0.00    |
|                              | Stable            | 0.03     | 0.01      | 2.66      | 0.01    |



## 1.1.5 Question 1: continuous - Physical environment

| fct                          | term              | estimate | std.error | statistic | p.value |
|------------------------------|-------------------|----------|-----------|-----------|---------|
|                              | (Intercept)       | 2.12     | 0.01      | 290.32    | 0.00    |
| age                          | 41-60             | -0.09    | 0.01      | -8.67     | 0.00    |
|                              | <= 40             | -0.06    | 0.01      | -4.14     | 0.00    |
| education                    | (Intercept)       | 2.08     | 0.01      | 347.07    | 0.00    |
|                              | Lower             | -0.02    | 0.01      | -1.57     | 0.12    |
| gender                       | (Intercept)       | 2.05     | 0.01      | 349.10    | 0.00    |
|                              | Man               | 0.08     | 0.01      | 6.99      | 0.00    |
|                              | Other/Undisclosed | -0.10    | 0.07      | -1.43     | 0.15    |
| healthcare_experience        | (Intercept)       | 2.10     | 0.01      | 332.92    | 0.00    |
|                              | Yes               | -0.08    | 0.01      | -8.19     | 0.00    |
| cognitive_health             | (Intercept)       | 2.06     | 0.01      | 404.03    | 0.00    |
|                              | Below average     | 0.10     | 0.02      | 4.90      | 0.00    |
| mental_health                | (Intercept)       | 2.07     | 0.01      | 388.51    | 0.00    |
|                              | Below average     | 0.03     | 0.01      | 2.28      | 0.02    |
| illness_experience           | (Intercept)       | 2.09     | 0.01      | 326.35    | 0.00    |
|                              | Yes               | -0.05    | 0.01      | -5.38     | 0.00    |
| brain_disease_caregiver      | (Intercept)       | 2.08     | 0.01      | 306.66    | 0.00    |
|                              | Yes               | -0.02    | 0.01      | -1.72     | 0.09    |
| brain_research_participation | (Intercept)       | 2.07     | 0.01      | 315.31    | 0.00    |
|                              | Yes               | -0.01    | 0.01      | -0.81     | 0.42    |
| relationship                 | (Intercept)       | 2.05     | 0.01      | 274.73    | 0.00    |
|                              | Stable            | 0.04     | 0.01      | 3.64      | 0.00    |

## 1.1.6 Question 1: continuous - Life goals

| fct                          | term              | estimate | std.error | statistic | p.value |
|------------------------------|-------------------|----------|-----------|-----------|---------|
|                              | (Intercept)       | 2.06     | 0.01      | 270.35    | 0.00    |
| age                          | 41-60             | -0.01    | 0.01      | -0.49     | 0.62    |
|                              | <= 40             | 0.09     | 0.01      | 6.00      | 0.00    |
| education                    | (Intercept)       | 2.06     | 0.01      | 329.50    | 0.00    |
|                              | Lower             | 0.04     | 0.01      | 3.25      | 0.00    |
| gender                       | (Intercept)       | 2.05     | 0.01      | 334.18    | 0.00    |
|                              | Man               | 0.07     | 0.01      | 6.14      | 0.00    |
|                              | Other/Undisclosed | 0.01     | 0.08      | 0.17      | 0.87    |
| healthcare_experience        | (Intercept)       | 2.11     | 0.01      | 320.69    | 0.00    |
|                              | Yes               | -0.11    | 0.01      | -10.78    | 0.00    |
| cognitive_health             | (Intercept)       | 2.07     | 0.01      | 387.00    | 0.00    |
|                              | Below average     | 0.06     | 0.02      | 2.79      | 0.01    |
| mental_health                | (Intercept)       | 2.06     | 0.01      | 371.13    | 0.00    |
|                              | Below average     | 0.07     | 0.02      | 4.39      | 0.00    |
| illness_experience           | (Intercept)       | 2.07     | 0.01      | 309.33    | 0.00    |
|                              | Yes               | -0.01    | 0.01      | -0.93     | 0.35    |
| brain_disease_caregiver      | (Intercept)       | 2.06     | 0.01      | 291.32    | 0.00    |
|                              | Yes               | 0.02     | 0.01      | 1.62      | 0.10    |
| brain_research_participation | (Intercept)       | 2.04     | 0.01      | 297.42    | 0.00    |
|                              | Yes               | 0.06     | 0.01      | 6.14      | 0.00    |
| relationship                 | (Intercept)       | 2.06     | 0.01      | 264.76    | 0.00    |
|                              | Stable            | 0.01     | 0.01      | 0.93      | 0.35    |

## 1.1.7 Question 1: continuous - Social environment

| fct                          | term              | estimate | std.error | statistic | p.value |
|------------------------------|-------------------|----------|-----------|-----------|---------|
|                              | (Intercept)       | 1.94     | 0.01      | 288.53    | 0.00    |
| age                          | 41-60             | -0.13    | 0.01      | -12.66    | 0.00    |
|                              | <= 40             | -0.26    | 0.01      | -20.07    | 0.00    |
| education                    | (Intercept)       | 1.83     | 0.01      | 329.44    | 0.00    |
|                              | Lower             | 0.06     | 0.01      | 6.20      | 0.00    |
| gender                       | (Intercept)       | 1.82     | 0.01      | 333.85    | 0.00    |
|                              | Man               | 0.11     | 0.01      | 10.85     | 0.00    |
|                              | Other/Undisclosed | -0.17    | 0.07      | -2.52     | 0.01    |
| healthcare_experience        | (Intercept)       | 1.90     | 0.01      | 324.88    | 0.00    |
|                              | Yes               | -0.14    | 0.01      | -14.45    | 0.00    |
| cognitive_health             | (Intercept)       | 1.84     | 0.00      | 387.94    | 0.00    |
|                              | Below average     | 0.13     | 0.02      | 6.66      | 0.00    |
| mental_health                | (Intercept)       | 1.86     | 0.00      | 375.25    | 0.00    |
|                              | Below average     | -0.04    | 0.01      | -2.84     | 0.00    |
| illness_experience           | (Intercept)       | 1.84     | 0.01      | 308.98    | 0.00    |
|                              | Yes               | 0.02     | 0.01      | 1.82      | 0.07    |
| brain_disease_caregiver      | (Intercept)       | 1.86     | 0.01      | 294.47    | 0.00    |
|                              | Yes               | -0.01    | 0.01      | -1.16     | 0.25    |
| brain_research_participation | (Intercept)       | 1.83     | 0.01      | 299.84    | 0.00    |
|                              | Yes               | 0.04     | 0.01      | 4.30      | 0.00    |
| relationship                 | (Intercept)       | 1.83     | 0.01      | 263.05    | 0.00    |
|                              | Stable            | 0.05     | 0.01      | 4.97      | 0.00    |

## 1.1.8 Question 1: continuous - Sleeping habits

| fct                          | term              | estimate | std.error | statistic | p.value |
|------------------------------|-------------------|----------|-----------|-----------|---------|
|                              | (Intercept)       | 1.98     | 0.01      | 312.03    | 0.00    |
| age                          | 41-60             | -0.28    | 0.01      | -29.04    | 0.00    |
|                              | <= 40             | -0.41    | 0.01      | -32.90    | 0.00    |
| education                    | (Intercept)       | 1.79     | 0.01      | 335.47    | 0.00    |
|                              | Lower             | 0.07     | 0.01      | 7.00      | 0.00    |
| gender                       | (Intercept)       | 1.77     | 0.01      | 339.42    | 0.00    |
|                              | Man               | 0.13     | 0.01      | 13.02     | 0.00    |
|                              | Other/Undisclosed | -0.04    | 0.07      | -0.65     | 0.51    |
| healthcare_experience        | (Intercept)       | 1.85     | 0.01      | 328.79    | 0.00    |
|                              | Yes               | -0.11    | 0.01      | -11.72    | 0.00    |
| cognitive_health             | (Intercept)       | 1.81     | 0.00      | 397.08    | 0.00    |
|                              | Below average     | -0.02    | 0.02      | -1.28     | 0.20    |
| mental_health                | (Intercept)       | 1.83     | 0.00      | 385.18    | 0.00    |
|                              | Below average     | -0.12    | 0.01      | -9.03     | 0.00    |
| illness_experience           | (Intercept)       | 1.83     | 0.01      | 318.62    | 0.00    |
|                              | Yes               | -0.04    | 0.01      | -3.95     | 0.00    |
| brain_disease_caregiver      | (Intercept)       | 1.80     | 0.01      | 296.79    | 0.00    |
|                              | Yes               | 0.03     | 0.01      | 3.77      | 0.00    |
| brain_research_participation | (Intercept)       | 1.76     | 0.01      | 300.63    | 0.00    |
|                              | Yes               | 0.12     | 0.01      | 13.42     | 0.00    |
| relationship                 | (Intercept)       | 1.76     | 0.01      | 264.10    | 0.00    |
|                              | Stable            | 0.10     | 0.01      | 10.98     | 0.00    |

## 1.1.9 Question 1: continuous - Physical health

| fct                          | term              | estimate | std.error | statistic | p.value |
|------------------------------|-------------------|----------|-----------|-----------|---------|
|                              | (Intercept)       | 1.82     | 0.01      | 290.41    | 0.00    |
| age                          | 41-60             | -0.07    | 0.01      | -7.65     | 0.00    |
|                              | <= 40             | -0.09    | 0.01      | -7.70     | 0.00    |
| education                    | (Intercept)       | 1.74     | 0.01      | 339.35    | 0.00    |
|                              | Lower             | 0.12     | 0.01      | 12.71     | 0.00    |
| gender                       | (Intercept)       | 1.76     | 0.01      | 347.94    | 0.00    |
|                              | Man               | 0.07     | 0.01      | 7.47      | 0.00    |
|                              | Other/Undisclosed | 0.01     | 0.06      | 0.21      | 0.83    |
| healthcare_experience        | (Intercept)       | 1.83     | 0.01      | 336.63    | 0.00    |
|                              | Yes               | -0.12    | 0.01      | -14.06    | 0.00    |
| cognitive_health             | (Intercept)       | 1.77     | 0.00      | 402.56    | 0.00    |
|                              | Below average     | 0.16     | 0.02      | 8.83      | 0.00    |
| mental_health                | (Intercept)       | 1.77     | 0.00      | 386.63    | 0.00    |
|                              | Below average     | 0.07     | 0.01      | 5.46      | 0.00    |
| illness_experience           | (Intercept)       | 1.76     | 0.01      | 318.36    | 0.00    |
|                              | Yes               | 0.05     | 0.01      | 6.01      | 0.00    |
| brain_disease_caregiver      | (Intercept)       | 1.80     | 0.01      | 308.40    | 0.00    |
|                              | Yes               | -0.04    | 0.01      | -4.98     | 0.00    |
| brain_research_participation | (Intercept)       | 1.79     | 0.01      | 315.78    | 0.00    |
|                              | Yes               | -0.02    | 0.01      | -2.45     | 0.01    |
| relationship                 | (Intercept)       | 1.78     | 0.01      | 277.38    | 0.00    |
|                              | Stable            | -0.01    | 0.01      | -0.66     | 0.51    |

## 1.1.10 Question 1: continuous - Genetics

| fct                          | term              | estimate | std.error | statistic | p.value |
|------------------------------|-------------------|----------|-----------|-----------|---------|
|                              | (Intercept)       | 1.82     | 0.01      | 261.11    | 0.00    |
| age                          | 41-60             | -0.03    | 0.01      | -2.59     | 0.01    |
|                              | <= 40             | 0.12     | 0.01      | 8.53      | 0.00    |
| education                    | (Intercept)       | 1.82     | 0.01      | 317.89    | 0.00    |
|                              | Lower             | 0.03     | 0.01      | 2.59      | 0.01    |
| gender                       | (Intercept)       | 1.80     | 0.01      | 320.51    | 0.00    |
|                              | Man               | 0.10     | 0.01      | 9.30      | 0.00    |
|                              | Other/Undisclosed | 0.32     | 0.07      | 4.60      | 0.00    |
| healthcare_experience        | (Intercept)       | 1.84     | 0.01      | 304.54    | 0.00    |
|                              | Yes               | -0.04    | 0.01      | -3.85     | 0.00    |
| cognitive_health             | (Intercept)       | 1.82     | 0.00      | 373.01    | 0.00    |
|                              | Below average     | 0.05     | 0.02      | 2.72      | 0.01    |
| mental_health                | (Intercept)       | 1.83     | 0.01      | 359.52    | 0.00    |
|                              | Below average     | -0.02    | 0.01      | -1.09     | 0.27    |
| illness_experience           | (Intercept)       | 1.83     | 0.01      | 298.97    | 0.00    |
|                              | Yes               | -0.02    | 0.01      | -2.07     | 0.04    |
| brain_disease_caregiver      | (Intercept)       | 1.89     | 0.01      | 293.37    | 0.00    |
|                              | Yes               | -0.14    | 0.01      | -15.23    | 0.00    |
| brain_research_participation | (Intercept)       | 1.86     | 0.01      | 296.18    | 0.00    |
|                              | Yes               | -0.08    | 0.01      | -8.22     | 0.00    |
| relationship                 | (Intercept)       | 1.86     | 0.01      | 260.76    | 0.00    |
|                              | Stable            | -0.06    | 0.01      | -6.27     | 0.00    |

## 1.1.11 Question 1: continuous - Substance use

| fct                          | term              | estimate | std.error | statistic | p.value |
|------------------------------|-------------------|----------|-----------|-----------|---------|
|                              | (Intercept)       | 1.57     | 0.01      | 243.70    | 0.00    |
| age                          | 41-60             | -0.14    | 0.01      | -14.92    | 0.00    |
|                              | <= 40             | -0.12    | 0.01      | -9.92     | 0.00    |
| education                    | (Intercept)       | 1.48     | 0.01      | 278.40    | 0.00    |
|                              | Lower             | 0.06     | 0.01      | 6.44      | 0.00    |
| gender                       | (Intercept)       | 1.46     | 0.01      | 281.44    | 0.00    |
|                              | Man               | 0.11     | 0.01      | 11.15     | 0.00    |
|                              | Other/Undisclosed | 0.18     | 0.06      | 2.83      | 0.00    |
| healthcare_experience        | (Intercept)       | 1.53     | 0.01      | 273.80    | 0.00    |
|                              | Yes               | -0.10    | 0.01      | -10.71    | 0.00    |
| cognitive_health             | (Intercept)       | 1.48     | 0.00      | 327.91    | 0.00    |
|                              | Below average     | 0.18     | 0.02      | 9.81      | 0.00    |
| mental_health                | (Intercept)       | 1.49     | 0.00      | 316.17    | 0.00    |
|                              | Below average     | 0.03     | 0.01      | 2.19      | 0.03    |
| illness_experience           | (Intercept)       | 1.47     | 0.01      | 259.31    | 0.00    |
|                              | Yes               | 0.05     | 0.01      | 5.55      | 0.00    |
| brain_disease_caregiver      | (Intercept)       | 1.50     | 0.01      | 249.82    | 0.00    |
|                              | Yes               | -0.01    | 0.01      | -1.46     | 0.14    |
| brain_research_participation | (Intercept)       | 1.49     | 0.01      | 255.10    | 0.00    |
|                              | Yes               | 0.02     | 0.01      | 2.00      | 0.05    |
| relationship                 | (Intercept)       | 1.50     | 0.01      | 226.32    | 0.00    |
|                              | Stable            | -0.01    | 0.01      | -0.65     | 0.52    |

## 1.2 binary

For peer review only



## 1.2.1 Question 1: binary - Income

| fct                          | term              | estimate | std.error | statistic | p.value |
|------------------------------|-------------------|----------|-----------|-----------|---------|
|                              | (Intercept)       | -0.54    | 0.02      | -29.28    | 0.00    |
| age                          | 41-60             | -0.02    | 0.03      | -0.87     | 0.38    |
|                              | <= 40             | -0.21    | 0.04      | -5.81     | 0.00    |
| education                    | (Intercept)       | -0.62    | 0.02      | -40.31    | 0.00    |
|                              | Lower             | 0.10     | 0.03      | 3.86      | 0.00    |
| gender                       | (Intercept)       | -0.57    | 0.01      | -38.16    | 0.00    |
|                              | Man               | -0.05    | 0.03      | -1.88     | 0.06    |
|                              | Other/Undisclosed | 0.17     | 0.18      | 0.93      | 0.35    |
| healthcare_experience        | (Intercept)       | -0.69    | 0.02      | -42.09    | 0.00    |
|                              | Yes               | 0.27     | 0.03      | 10.31     | 0.00    |
| cognitive_health             | (Intercept)       | -0.58    | 0.01      | -45.02    | 0.00    |
|                              | Below average     | 0.04     | 0.05      | 0.74      | 0.46    |
| mental_health                | (Intercept)       | -0.58    | 0.01      | -43.13    | 0.00    |
|                              | Below average     | 0.00     | 0.04      | 0.07      | 0.94    |
| illness_experience           | (Intercept)       | -0.64    | 0.02      | -38.97    | 0.00    |
|                              | Yes               | 0.14     | 0.03      | 5.57      | 0.00    |
| brain_disease_caregiver      | (Intercept)       | -0.60    | 0.02      | -34.83    | 0.00    |
|                              | Yes               | 0.04     | 0.03      | 1.58      | 0.11    |
| brain_research_participation | (Intercept)       | -0.61    | 0.02      | -36.13    | 0.00    |
|                              | Yes               | 0.05     | 0.03      | 2.11      | 0.03    |
| relationship                 | (Intercept)       | -0.58    | 0.02      | -30.68    | 0.00    |
|                              | Stable            | 0.00     | 0.03      | -0.05     | 0.96    |

## 1.2.2 Question 1: binary - Profession

| fct                          | term              | estimate | std.error | statistic | p.value |
|------------------------------|-------------------|----------|-----------|-----------|---------|
|                              | (Intercept)       | 0.13     | 0.02      | 7.30      | 0.00    |
| age                          | 41-60             | 0.15     | 0.03      | 5.61      | 0.00    |
|                              | <= 40             | 0.29     | 0.04      | 8.08      | 0.00    |
| education                    | (Intercept)       | 0.32     | 0.01      | 21.78     | 0.00    |
|                              | Lower             | -0.28    | 0.03      | -10.78    | 0.00    |
| gender                       | (Intercept)       | 0.19     | 0.01      | 12.91     | 0.00    |
|                              | Man               | 0.17     | 0.03      | 6.11      | 0.00    |
|                              | Other/Undisclosed | -0.01    | 0.18      | -0.07     | 0.95    |
| healthcare_experience        | (Intercept)       | 0.15     | 0.02      | 9.99      | 0.00    |
|                              | Yes               | 0.20     | 0.03      | 8.10      | 0.00    |
| cognitive_health             | (Intercept)       | 0.24     | 0.01      | 19.47     | 0.00    |
|                              | Below average     | -0.20    | 0.05      | -3.92     | 0.00    |
| mental_health                | (Intercept)       | 0.25     | 0.01      | 19.12     | 0.00    |
|                              | Below average     | -0.13    | 0.04      | -3.69     | 0.00    |
| illness_experience           | (Intercept)       | 0.26     | 0.02      | 16.25     | 0.00    |
|                              | Yes               | -0.06    | 0.02      | -2.38     | 0.02    |
| brain_disease_caregiver      | (Intercept)       | 0.29     | 0.02      | 17.29     | 0.00    |
|                              | Yes               | -0.12    | 0.02      | -4.94     | 0.00    |
| brain_research_participation | (Intercept)       | 0.29     | 0.02      | 18.13     | 0.00    |
|                              | Yes               | -0.14    | 0.02      | -5.77     | 0.00    |
| relationship                 | (Intercept)       | 0.24     | 0.02      | 13.32     | 0.00    |
|                              | Stable            | -0.02    | 0.02      | -0.86     | 0.39    |

## 1.2.3 Question 1: binary - Education

| fct                          | term              | estimate | std.error | statistic | p.value |
|------------------------------|-------------------|----------|-----------|-----------|---------|
|                              | (Intercept)       | 0.44     | 0.02      | 24.30     | 0.00    |
| age                          | 41-60             | -0.07    | 0.03      | -2.57     | 0.01    |
|                              | <= 40             | 0.11     | 0.04      | 2.97      | 0.00    |
| education                    | (Intercept)       | 0.59     | 0.02      | 38.77     | 0.00    |
|                              | Lower             | -0.48    | 0.03      | -18.32    | 0.00    |
| gender                       | (Intercept)       | 0.40     | 0.01      | 27.28     | 0.00    |
|                              | Man               | 0.12     | 0.03      | 4.40      | 0.00    |
|                              | Other/Undisclosed | 0.20     | 0.19      | 1.09      | 0.28    |
| healthcare_experience        | (Intercept)       | 0.32     | 0.02      | 20.77     | 0.00    |
|                              | Yes               | 0.29     | 0.03      | 11.23     | 0.00    |
| cognitive_health             | (Intercept)       | 0.46     | 0.01      | 35.77     | 0.00    |
|                              | Below average     | -0.39    | 0.05      | -7.57     | 0.00    |
| mental_health                | (Intercept)       | 0.48     | 0.01      | 35.81     | 0.00    |
|                              | Below average     | -0.33    | 0.04      | -9.05     | 0.00    |
| illness_experience           | (Intercept)       | 0.47     | 0.02      | 29.52     | 0.00    |
|                              | Yes               | -0.10    | 0.03      | -4.03     | 0.00    |
| brain_disease_caregiver      | (Intercept)       | 0.47     | 0.02      | 27.85     | 0.00    |
|                              | Yes               | -0.08    | 0.02      | -3.40     | 0.00    |
| brain_research_participation | (Intercept)       | 0.44     | 0.02      | 26.81     | 0.00    |
|                              | Yes               | -0.02    | 0.02      | -0.61     | 0.54    |
| relationship                 | (Intercept)       | 0.42     | 0.02      | 22.55     | 0.00    |
|                              | Stable            | 0.03     | 0.02      | 1.03      | 0.30    |

## 1.2.4 Question 1: binary - Diet

| fct                          | term              | estimate | std.error | statistic | p.value |
|------------------------------|-------------------|----------|-----------|-----------|---------|
|                              | (Intercept)       | 0.69     | 0.02      | 36.76     | 0.00    |
| age                          | 41-60             | 0.43     | 0.03      | 14.59     | 0.00    |
|                              | <= 40             | 0.47     | 0.04      | 11.71     | 0.00    |
| education                    | (Intercept)       | 1.00     | 0.02      | 60.83     | 0.00    |
|                              | Lower             | -0.24    | 0.03      | -8.44     | 0.00    |
| gender                       | (Intercept)       | 1.03     | 0.02      | 63.33     | 0.00    |
|                              | Man               | -0.36    | 0.03      | -12.40    | 0.00    |
|                              | Other/Undisclosed | -0.06    | 0.20      | -0.32     | 0.75    |
| healthcare_experience        | (Intercept)       | 0.80     | 0.02      | 48.06     | 0.00    |
|                              | Yes               | 0.33     | 0.03      | 11.70     | 0.00    |
| cognitive_health             | (Intercept)       | 0.95     | 0.01      | 68.49     | 0.00    |
|                              | Below average     | -0.46    | 0.05      | -8.67     | 0.00    |
| mental_health                | (Intercept)       | 0.96     | 0.01      | 66.14     | 0.00    |
|                              | Below average     | -0.26    | 0.04      | -6.77     | 0.00    |
| illness_experience           | (Intercept)       | 0.98     | 0.02      | 55.61     | 0.00    |
|                              | Yes               | -0.13    | 0.03      | -4.76     | 0.00    |
| brain_disease_caregiver      | (Intercept)       | 0.85     | 0.02      | 46.89     | 0.00    |
|                              | Yes               | 0.17     | 0.03      | 6.29      | 0.00    |
| brain_research_participation | (Intercept)       | 0.90     | 0.02      | 51.08     | 0.00    |
|                              | Yes               | 0.04     | 0.03      | 1.59      | 0.11    |
| relationship                 | (Intercept)       | 0.94     | 0.02      | 46.61     | 0.00    |
|                              | Stable            | -0.04    | 0.03      | -1.41     | 0.16    |

## 1.2.5 Question 1: binary - Physical environment

| fct                          | term              | estimate | std.error | statistic | p.value |
|------------------------------|-------------------|----------|-----------|-----------|---------|
|                              | (Intercept)       | 0.84     | 0.02      | 43.31     | 0.00    |
| age                          | 41-60             | 0.23     | 0.03      | 7.59      | 0.00    |
|                              | <= 40             | 0.09     | 0.04      | 2.42      | 0.02    |
| education                    | (Intercept)       | 0.92     | 0.02      | 56.95     | 0.00    |
|                              | Lower             | 0.06     | 0.03      | 1.90      | 0.06    |
| gender                       | (Intercept)       | 0.98     | 0.02      | 60.95     | 0.00    |
|                              | Man               | -0.15    | 0.03      | -5.16     | 0.00    |
|                              | Other/Undisclosed | 0.27     | 0.21      | 1.27      | 0.20    |
| healthcare_experience        | (Intercept)       | 0.87     | 0.02      | 51.54     | 0.00    |
|                              | Yes               | 0.17     | 0.03      | 6.27      | 0.00    |
| cognitive_health             | (Intercept)       | 0.95     | 0.01      | 68.45     | 0.00    |
|                              | Below average     | -0.23    | 0.05      | -4.22     | 0.00    |
| mental_health                | (Intercept)       | 0.95     | 0.01      | 65.66     | 0.00    |
|                              | Below average     | -0.09    | 0.04      | -2.29     | 0.02    |
| illness_experience           | (Intercept)       | 0.88     | 0.02      | 51.40     | 0.00    |
|                              | Yes               | 0.13     | 0.03      | 4.88      | 0.00    |
| brain_disease_caregiver      | (Intercept)       | 0.92     | 0.02      | 50.32     | 0.00    |
|                              | Yes               | 0.03     | 0.03      | 1.25      | 0.21    |
| brain_research_participation | (Intercept)       | 0.93     | 0.02      | 52.21     | 0.00    |
|                              | Yes               | 0.02     | 0.03      | 0.65      | 0.52    |
| relationship                 | (Intercept)       | 0.97     | 0.02      | 47.76     | 0.00    |
|                              | Stable            | -0.07    | 0.03      | -2.46     | 0.01    |

## 1.2.6 Question 1: binary - Life goals

| fct                          | term              | estimate | std.error | statistic | p.value |
|------------------------------|-------------------|----------|-----------|-----------|---------|
|                              | (Intercept)       | 1.06     | 0.02      | 52.30     | 0.00    |
| age                          | 41-60             | -0.05    | 0.03      | -1.73     | 0.08    |
|                              | <= 40             | -0.34    | 0.04      | -9.10     | 0.00    |
| education                    | (Intercept)       | 1.00     | 0.02      | 61.07     | 0.00    |
|                              | Lower             | -0.06    | 0.03      | -2.21     | 0.03    |
| gender                       | (Intercept)       | 1.02     | 0.02      | 62.87     | 0.00    |
|                              | Man               | -0.12    | 0.03      | -4.00     | 0.00    |
|                              | Other/Undisclosed | -0.13    | 0.20      | -0.66     | 0.51    |
| healthcare_experience        | (Intercept)       | 0.89     | 0.02      | 52.63     | 0.00    |
|                              | Yes               | 0.24     | 0.03      | 8.66      | 0.00    |
| cognitive_health             | (Intercept)       | 0.99     | 0.01      | 70.68     | 0.00    |
|                              | Below average     | -0.10    | 0.06      | -1.75     | 0.08    |
| mental_health                | (Intercept)       | 1.01     | 0.01      | 69.23     | 0.00    |
|                              | Below average     | -0.22    | 0.04      | -5.74     | 0.00    |
| illness_experience           | (Intercept)       | 0.97     | 0.02      | 55.48     | 0.00    |
|                              | Yes               | 0.03     | 0.03      | 1.12      | 0.26    |
| brain_disease_caregiver      | (Intercept)       | 1.00     | 0.02      | 53.83     | 0.00    |
|                              | Yes               | -0.04    | 0.03      | -1.44     | 0.15    |
| brain_research_participation | (Intercept)       | 1.05     | 0.02      | 57.29     | 0.00    |
|                              | Yes               | -0.14    | 0.03      | -5.19     | 0.00    |
| relationship                 | (Intercept)       | 0.98     | 0.02      | 47.91     | 0.00    |
|                              | Stable            | 0.01     | 0.03      | 0.45      | 0.65    |

## 1.2.7 Question 1: binary - Social environment

| fct                          | term              | estimate | std.error | statistic | p.value |
|------------------------------|-------------------|----------|-----------|-----------|---------|
|                              | (Intercept)       | 1.38     | 0.02      | 62.38     | 0.00    |
| age                          | 41-60             | 0.29     | 0.03      | 8.18      | 0.00    |
|                              | <= 40             | 0.55     | 0.05      | 10.93     | 0.00    |
| education                    | (Intercept)       | 1.63     | 0.02      | 82.78     | 0.00    |
|                              | Lower             | -0.18    | 0.03      | -5.46     | 0.00    |
| gender                       | (Intercept)       | 1.66     | 0.02      | 85.12     | 0.00    |
|                              | Man               | -0.32    | 0.03      | -9.48     | 0.00    |
|                              | Other/Undisclosed | 0.58     | 0.30      | 1.91      | 0.06    |
| healthcare_experience        | (Intercept)       | 1.43     | 0.02      | 73.23     | 0.00    |
|                              | Yes               | 0.39     | 0.03      | 11.55     | 0.00    |
| cognitive_health             | (Intercept)       | 1.59     | 0.02      | 95.96     | 0.00    |
|                              | Below average     | -0.41    | 0.06      | -6.76     | 0.00    |
| mental_health                | (Intercept)       | 1.56     | 0.02      | 91.36     | 0.00    |
|                              | Below average     | 0.03     | 0.05      | 0.62      | 0.53    |
| illness_experience           | (Intercept)       | 1.59     | 0.02      | 76.29     | 0.00    |
|                              | Yes               | -0.05    | 0.03      | -1.55     | 0.12    |
| brain_disease_caregiver      | (Intercept)       | 1.55     | 0.02      | 71.32     | 0.00    |
|                              | Yes               | 0.04     | 0.03      | 1.41      | 0.16    |
| brain_research_participation | (Intercept)       | 1.60     | 0.02      | 74.70     | 0.00    |
|                              | Yes               | -0.07    | 0.03      | -2.32     | 0.02    |
| relationship                 | (Intercept)       | 1.58     | 0.02      | 65.50     | 0.00    |
|                              | Stable            | -0.03    | 0.03      | -0.86     | 0.39    |

## 1.2.8 Question 1: binary - Sleeping habits

| fct                          | term              | estimate | std.error | statistic | p.value |
|------------------------------|-------------------|----------|-----------|-----------|---------|
|                              | (Intercept)       | 1.36     | 0.02      | 61.79     | 0.00    |
| age                          | 41-60             | 0.72     | 0.04      | 18.89     | 0.00    |
|                              | <= 40             | 1.02     | 0.06      | 17.61     | 0.00    |
| education                    | (Intercept)       | 1.80     | 0.02      | 86.24     | 0.00    |
|                              | Lower             | -0.18    | 0.04      | -5.11     | 0.00    |
| gender                       | (Intercept)       | 1.86     | 0.02      | 88.80     | 0.00    |
|                              | Man               | -0.39    | 0.04      | -10.87    | 0.00    |
|                              | Other/Undisclosed | 0.08     | 0.27      | 0.29      | 0.78    |
| healthcare_experience        | (Intercept)       | 1.63     | 0.02      | 78.39     | 0.00    |
|                              | Yes               | 0.30     | 0.04      | 8.36      | 0.00    |
| cognitive_health             | (Intercept)       | 1.74     | 0.02      | 99.75     | 0.00    |
|                              | Below average     | -0.08    | 0.07      | -1.21     | 0.23    |
| mental_health                | (Intercept)       | 1.70     | 0.02      | 95.01     | 0.00    |
|                              | Below average     | 0.29     | 0.05      | 5.28      | 0.00    |
| illness_experience           | (Intercept)       | 1.69     | 0.02      | 78.50     | 0.00    |
|                              | Yes               | 0.12     | 0.03      | 3.39      | 0.00    |
| brain_disease_caregiver      | (Intercept)       | 1.77     | 0.02      | 75.60     | 0.00    |
|                              | Yes               | -0.06    | 0.03      | -1.68     | 0.09    |
| brain_research_participation | (Intercept)       | 1.90     | 0.02      | 79.81     | 0.00    |
|                              | Yes               | -0.34    | 0.03      | -10.04    | 0.00    |
| relationship                 | (Intercept)       | 1.86     | 0.03      | 69.87     | 0.00    |
|                              | Stable            | -0.21    | 0.03      | -6.01     | 0.00    |



## 1.2.9 Question 1: binary - Physical health

| fct                          | term              | estimate | std.error | statistic | p.value |
|------------------------------|-------------------|----------|-----------|-----------|---------|
|                              | (Intercept)       | 1.87     | 0.03      | 71.58     | 0.00    |
| age                          | 41-60             | 0.13     | 0.04      | 3.28      | 0.00    |
|                              | <= 40             | 0.16     | 0.05      | 2.97      | 0.00    |
| education                    | (Intercept)       | 2.05     | 0.02      | 89.45     | 0.00    |
|                              | Lower             | -0.31    | 0.04      | -8.30     | 0.00    |
| gender                       | (Intercept)       | 2.02     | 0.02      | 90.79     | 0.00    |
|                              | Man               | -0.26    | 0.04      | -6.75     | 0.00    |
|                              | Other/Undisclosed | -0.29    | 0.25      | -1.14     | 0.25    |
| healthcare_experience        | (Intercept)       | 1.79     | 0.02      | 81.42     | 0.00    |
|                              | Yes               | 0.43     | 0.04      | 10.86     | 0.00    |
| cognitive_health             | (Intercept)       | 1.98     | 0.02      | 103.89    | 0.00    |
|                              | Below average     | -0.58    | 0.06      | -8.95     | 0.00    |
| mental_health                | (Intercept)       | 1.98     | 0.02      | 99.84     | 0.00    |
|                              | Below average     | -0.29    | 0.05      | -5.84     | 0.00    |
| illness_experience           | (Intercept)       | 2.02     | 0.02      | 83.15     | 0.00    |
|                              | Yes               | -0.19    | 0.04      | -5.27     | 0.00    |
| brain_disease_caregiver      | (Intercept)       | 1.90     | 0.02      | 77.40     | 0.00    |
|                              | Yes               | 0.10     | 0.04      | 2.75      | 0.01    |
| brain_research_participation | (Intercept)       | 1.92     | 0.02      | 80.03     | 0.00    |
|                              | Yes               | 0.05     | 0.04      | 1.46      | 0.14    |
| relationship                 | (Intercept)       | 1.90     | 0.03      | 70.39     | 0.00    |
|                              | Stable            | 0.07     | 0.04      | 1.84      | 0.07    |

## 1.2.10 Question 1: binary - Genetics

| fct                          | term              | estimate | std.error | statistic | p.value |
|------------------------------|-------------------|----------|-----------|-----------|---------|
|                              | (Intercept)       | 1.62     | 0.02      | 67.72     | 0.00    |
| age                          | 41-60             | 0.01     | 0.04      | 0.27      | 0.79    |
|                              | <= 40             | -0.43    | 0.04      | -10.19    | 0.00    |
| education                    | (Intercept)       | 1.56     | 0.02      | 81.15     | 0.00    |
|                              | Lower             | -0.06    | 0.03      | -1.67     | 0.09    |
| gender                       | (Intercept)       | 1.61     | 0.02      | 84.01     | 0.00    |
|                              | Man               | -0.23    | 0.03      | -6.74     | 0.00    |
|                              | Other/Undisclosed | -0.77    | 0.20      | -3.97     | 0.00    |
| healthcare_experience        | (Intercept)       | 1.50     | 0.02      | 75.21     | 0.00    |
|                              | Yes               | 0.12     | 0.03      | 3.52      | 0.00    |
| cognitive_health             | (Intercept)       | 1.55     | 0.02      | 94.77     | 0.00    |
|                              | Below average     | -0.19    | 0.06      | -2.94     | 0.00    |
| mental_health                | (Intercept)       | 1.54     | 0.02      | 90.69     | 0.00    |
|                              | Below average     | 0.01     | 0.05      | 0.27      | 0.79    |
| illness_experience           | (Intercept)       | 1.52     | 0.02      | 74.65     | 0.00    |
|                              | Yes               | 0.06     | 0.03      | 1.74      | 0.08    |
| brain_disease_caregiver      | (Intercept)       | 1.37     | 0.02      | 66.76     | 0.00    |
|                              | Yes               | 0.39     | 0.03      | 12.18     | 0.00    |
| brain_research_participation | (Intercept)       | 1.45     | 0.02      | 71.10     | 0.00    |
|                              | Yes               | 0.22     | 0.03      | 6.69      | 0.00    |
| relationship                 | (Intercept)       | 1.44     | 0.02      | 62.39     | 0.00    |
|                              | Stable            | 0.18     | 0.03      | 5.83      | 0.00    |

## 1.2.11 Question 1: binary - Substance use

| fct                          | term              | estimate | std.error | statistic | p.value |
|------------------------------|-------------------|----------|-----------|-----------|---------|
|                              | (Intercept)       | 2.26     | 0.03      | 74.47     | 0.00    |
| age                          | 41-60             | 0.53     | 0.05      | 10.25     | 0.00    |
|                              | <= 40             | 0.36     | 0.07      | 5.35      | 0.00    |
| education                    | (Intercept)       | 2.59     | 0.03      | 90.65     | 0.00    |
|                              | Lower             | -0.28    | 0.05      | -6.03     | 0.00    |
| gender                       | (Intercept)       | 2.63     | 0.03      | 92.09     | 0.00    |
|                              | Man               | -0.42    | 0.05      | -8.88     | 0.00    |
|                              | Other/Undisclosed | -0.83    | 0.26      | -3.24     | 0.00    |
| healthcare_experience        | (Intercept)       | 2.35     | 0.03      | 86.09     | 0.00    |
|                              | Yes               | 0.41     | 0.05      | 8.25      | 0.00    |
| cognitive_health             | (Intercept)       | 2.54     | 0.02      | 106.27    | 0.00    |
|                              | Below average     | -0.63    | 0.08      | -8.13     | 0.00    |
| mental_health                | (Intercept)       | 2.51     | 0.02      | 102.24    | 0.00    |
|                              | Below average     | -0.13    | 0.06      | -1.95     | 0.05    |
| illness_experience           | (Intercept)       | 2.58     | 0.03      | 84.53     | 0.00    |
|                              | Yes               | -0.21    | 0.05      | -4.59     | 0.00    |
| brain_disease_caregiver      | (Intercept)       | 2.44     | 0.03      | 80.36     | 0.00    |
|                              | Yes               | 0.12     | 0.05      | 2.66      | 0.01    |
| brain_research_participation | (Intercept)       | 2.49     | 0.03      | 82.75     | 0.00    |
|                              | Yes               | 0.00     | 0.05      | 0.09      | 0.93    |
| relationship                 | (Intercept)       | 2.45     | 0.03      | 72.93     | 0.00    |
|                              | Stable            | 0.08     | 0.05      | 1.78      | 0.08    |

1  
2  
3 **1.3 ordinal**  
4  
5  
6  
7  
8  
9  
10  
11  
12  
13  
14  
15  
16  
17  
18  
19  
20  
21  
22  
23  
24  
25  
26  
27  
28  
29  
30  
31  
32  
33  
34  
35  
36  
37  
38  
39  
40  
41  
42  
43  
44  
45  
46  
47  
48  
49  
50  
51  
52  
53  
54  
55  
56  
57  
58  
59  
60

For peer review only

1  
2  
3  
4  
5  
6  
7  
8  
9  
10  
11  
12  
13  
14  
15  
16  
17  
18  
19  
20  
21  
22  
23  
24  
25  
26  
27  
28  
29  
30  
31  
32  
33  
34  
35  
36  
37  
38  
39  
40  
41  
42  
43  
44  
45  
46  
47  
48  
49  
50  
51  
52  
53  
54  
55  
56  
57  
58  
59  
60

For peer review only

## 1.3.1 Question 1: ordinal - Income

| fct                     | term               | estimate | std.error | statistic | coef.type   |
|-------------------------|--------------------|----------|-----------|-----------|-------------|
| age                     | 41-60              | 0.04     | 0.02      | 1.54      | coefficient |
|                         | <= 40              | 0.28     | 0.03      | 8.59      | coefficient |
|                         | Very strong Strong | -2.67    | 0.03      | -96.49    | scale       |
|                         | Strong Moderate    | -0.53    | 0.02      | -30.55    | scale       |
|                         | Moderate Weak      | 1.47     | 0.02      | 75.45     | scale       |
|                         | Weak No influence  | 3.26     | 0.03      | 97.40     | scale       |
| education               | Lower              | -0.09    | 0.02      | -3.53     | coefficient |
|                         | Very strong Strong | -2.75    | 0.03      | -104.63   | scale       |
|                         | Strong Moderate    | -0.61    | 0.01      | -41.51    | scale       |
|                         | Moderate Weak      | 1.38     | 0.02      | 82.24     | scale       |
|                         | Weak No influence  | 3.17     | 0.03      | 99.42     | scale       |
| gender                  | Man                | 0.12     | 0.02      | 4.63      | coefficient |
|                         | Other/Undisclosed  | -0.18    | 0.17      | -1.02     | coefficient |
|                         | Very strong Strong | -2.69    | 0.03      | -103.57   | scale       |
|                         | Strong Moderate    | -0.55    | 0.01      | -38.47    | scale       |
|                         | Moderate Weak      | 1.44     | 0.02      | 85.65     | scale       |
| healthcare_experience   | Weak No influence  | 3.23     | 0.03      | 101.07    | scale       |
|                         | Yes                | -0.29    | 0.02      | -12.49    | coefficient |
|                         | Very strong Strong | -2.84    | 0.03      | -105.35   | scale       |
|                         | Strong Moderate    | -0.70    | 0.02      | -44.58    | scale       |
|                         | Moderate Weak      | 1.30     | 0.02      | 75.45     | scale       |
| cognitive_health        | Weak No influence  | 3.09     | 0.03      | 96.52     | scale       |
|                         | Below average      | 0.10     | 0.05      | 2.11      | coefficient |
|                         | Very strong Strong | -2.72    | 0.03      | -107.62   | scale       |
|                         | Strong Moderate    | -0.58    | 0.01      | -44.84    | scale       |
|                         | Moderate Weak      | 1.42     | 0.02      | 91.57     | scale       |
| mental_health           | Weak No influence  | 3.20     | 0.03      | 102.60    | scale       |
|                         | Below average      | 0.06     | 0.03      | 1.68      | coefficient |
|                         | Very strong Strong | -2.72    | 0.03      | -106.70   | scale       |
|                         | Strong Moderate    | -0.58    | 0.01      | -43.37    | scale       |
|                         | Moderate Weak      | 1.42     | 0.02      | 89.62     | scale       |
| illness_experience      | Weak No influence  | 3.20     | 0.03      | 102.06    | scale       |
|                         | Yes                | -0.12    | 0.02      | -5.38     | coefficient |
|                         | Very strong Strong | -2.77    | 0.03      | -103.25   | scale       |
|                         | Strong Moderate    | -0.63    | 0.02      | -40.50    | scale       |
|                         | Moderate Weak      | 1.36     | 0.02      | 77.59     | scale       |
| brain_disease_caregiver | Weak No influence  | 3.15     | 0.03      | 97.60     | scale       |
|                         | Yes                | -0.04    | 0.02      | -1.64     | coefficient |
|                         | Very strong Strong | -2.74    | 0.03      | -100.65   | scale       |
| brain_disease_caregiver | Strong Moderate    | -0.60    | 0.02      | -36.65    | scale       |
|                         | Moderate Weak      | 1.39     | 0.02      | 75.87     | scale       |

1  
2  
3  
4  
5  
6  
7  
8  
9  
10  
11  
12  
13  
14  
15  
16  
17  
18  
19  
20  
21  
22  
23  
24  
25  
26  
27  
28  
29  
30  
31  
32  
33  
34  
35  
36  
37  
38  
39  
40  
41  
42  
43  
44  
45  
46  
47  
48  
49  
50  
51  
52  
53  
54  
55  
56  
57  
58  
59  
60

For peer review only

## 1.3.2 Question 1: ordinal - Profession

| fct                     | term               | estimate | std.error | statistic | coef.type   |
|-------------------------|--------------------|----------|-----------|-----------|-------------|
| age                     | 41-60              | -0.17    | 0.02      | -7.01     | coefficient |
|                         | <= 40              | -0.38    | 0.03      | -11.75    | coefficient |
|                         | Very strong Strong | -2.04    | 0.02      | -92.50    | scale       |
|                         | Strong Moderate    | 0.11     | 0.02      | 6.35      | scale       |
|                         | Moderate Weak      | 2.17     | 0.02      | 91.21     | scale       |
|                         | Weak No influence  | 3.75     | 0.04      | 85.03     | scale       |
| education               | Lower              | 0.30     | 0.02      | 12.53     | coefficient |
|                         | Very strong Strong | -1.82    | 0.02      | -94.52    | scale       |
|                         | Strong Moderate    | 0.33     | 0.01      | 22.77     | scale       |
|                         | Moderate Weak      | 2.39     | 0.02      | 106.10    | scale       |
|                         | Weak No influence  | 3.97     | 0.04      | 91.30     | scale       |
| gender                  | Man                | -0.14    | 0.02      | -5.56     | coefficient |
|                         | Other/Undisclosed  | 0.00     | 0.17      | -0.01     | coefficient |
|                         | Very strong Strong | -1.94    | 0.02      | -99.89    | scale       |
|                         | Strong Moderate    | 0.19     | 0.01      | 13.84     | scale       |
|                         | Moderate Weak      | 2.25     | 0.02      | 102.78    | scale       |
| healthcare_experience   | Weak No influence  | 3.83     | 0.04      | 88.77     | scale       |
|                         | Yes                | -0.22    | 0.02      | -9.65     | coefficient |
|                         | Very strong Strong | -1.99    | 0.02      | -98.03    | scale       |
|                         | Strong Moderate    | 0.15     | 0.02      | 9.79      | scale       |
|                         | Moderate Weak      | 2.20     | 0.02      | 98.33     | scale       |
| cognitive_health        | Weak No influence  | 3.79     | 0.04      | 87.28     | scale       |
|                         | Below average      | 0.24     | 0.05      | 5.08      | coefficient |
|                         | Very strong Strong | -1.89    | 0.02      | -104.23   | scale       |
|                         | Strong Moderate    | 0.25     | 0.01      | 19.74     | scale       |
|                         | Moderate Weak      | 2.30     | 0.02      | 109.13    | scale       |
| mental_health           | Weak No influence  | 3.89     | 0.04      | 90.82     | scale       |
|                         | Below average      | 0.10     | 0.03      | 3.13      | coefficient |
|                         | Very strong Strong | -1.89    | 0.02      | -102.62   | scale       |
|                         | Strong Moderate    | 0.25     | 0.01      | 19.05     | scale       |
|                         | Moderate Weak      | 2.30     | 0.02      | 107.74    | scale       |
| illness_experience      | Weak No influence  | 3.88     | 0.04      | 90.52     | scale       |
|                         | Yes                | 0.05     | 0.02      | 2.17      | coefficient |
|                         | Very strong Strong | -1.88    | 0.02      | -93.76    | scale       |
|                         | Strong Moderate    | 0.25     | 0.02      | 16.56     | scale       |
|                         | Moderate Weak      | 2.31     | 0.02      | 101.00    | scale       |
| brain_disease_caregiver | Weak No influence  | 3.89     | 0.04      | 89.08     | scale       |
|                         | Yes                | 0.13     | 0.02      | 6.01      | coefficient |
|                         | Very strong Strong | -1.84    | 0.02      | -91.51    | scale       |
| brain_disease_caregiver | Strong Moderate    | 0.30     | 0.02      | 18.37     | scale       |
|                         | Moderate Weak      | 2.35     | 0.02      | 100.01    | scale       |



1  
2  
3  
4  
5  
6  
7  
8  
9  
10  
11  
12  
13  
14  
15  
16  
17  
18  
19  
20  
21  
22  
23  
24  
25  
26  
27  
28  
29  
30  
31  
32  
33  
34  
35  
36  
37  
38  
39  
40  
41  
42  
43  
44  
45  
46  
47  
48  
49  
50  
51  
52  
53  
54  
55  
56  
57  
58  
59  
60

For peer review only

## 1.3.3 Question 1: ordinal - Education

| fct                     | term               | estimate | std.error | statistic | coef.type   |
|-------------------------|--------------------|----------|-----------|-----------|-------------|
| age                     | 41-60              | 0.04     | 0.02      | 1.78      | coefficient |
|                         | <= 40              | -0.23    | 0.03      | -7.05     | coefficient |
|                         | Very strong Strong | -1.57    | 0.02      | -78.90    | scale       |
|                         | Strong Moderate    | 0.41     | 0.02      | 24.25     | scale       |
|                         | Moderate Weak      | 2.40     | 0.03      | 95.97     | scale       |
|                         | Weak No influence  | 4.09     | 0.05      | 83.03     | scale       |
| education               | Lower              | 0.49     | 0.02      | 20.39     | coefficient |
|                         | Very strong Strong | -1.41    | 0.02      | -82.11    | scale       |
|                         | Strong Moderate    | 0.59     | 0.01      | 40.19     | scale       |
|                         | Moderate Weak      | 2.59     | 0.02      | 108.65    | scale       |
|                         | Weak No influence  | 4.29     | 0.05      | 87.97     | scale       |
|                         | Man                | -0.10    | 0.02      | -3.93     | coefficient |
| gender                  | Other/Undisclosed  | -0.15    | 0.17      | -0.89     | coefficient |
|                         | Very strong Strong | -1.57    | 0.02      | -90.20    | scale       |
|                         | Strong Moderate    | 0.41     | 0.01      | 28.67     | scale       |
|                         | Moderate Weak      | 2.39     | 0.02      | 103.91    | scale       |
|                         | Weak No influence  | 4.08     | 0.05      | 84.51     | scale       |
|                         | Yes                | -0.30    | 0.02      | -13.11    | coefficient |
| healthcare_experience   | Very strong Strong | -1.67    | 0.02      | -89.89    | scale       |
|                         | Strong Moderate    | 0.32     | 0.02      | 21.11     | scale       |
|                         | Moderate Weak      | 2.31     | 0.02      | 98.63     | scale       |
|                         | Weak No influence  | 4.00     | 0.05      | 82.61     | scale       |
|                         | Below average      | 0.41     | 0.05      | 8.71      | coefficient |
|                         | Very strong Strong | -1.52    | 0.02      | -95.08    | scale       |
| cognitive_health        | Strong Moderate    | 0.46     | 0.01      | 36.06     | scale       |
|                         | Moderate Weak      | 2.45     | 0.02      | 109.73    | scale       |
|                         | Weak No influence  | 4.14     | 0.05      | 86.28     | scale       |
|                         | Below average      | 0.32     | 0.03      | 9.56      | coefficient |
|                         | Very strong Strong | -1.51    | 0.02      | -92.50    | scale       |
|                         | Strong Moderate    | 0.47     | 0.01      | 36.15     | scale       |
| mental_health           | Moderate Weak      | 2.46     | 0.02      | 109.02    | scale       |
|                         | Weak No influence  | 4.15     | 0.05      | 86.39     | scale       |
|                         | Yes                | 0.10     | 0.02      | 4.43      | coefficient |
|                         | Very strong Strong | -1.51    | 0.02      | -82.88    | scale       |
|                         | Strong Moderate    | 0.47     | 0.02      | 30.73     | scale       |
|                         | Moderate Weak      | 2.46     | 0.02      | 102.68    | scale       |
| illness_experience      | Weak No influence  | 4.15     | 0.05      | 85.13     | scale       |
|                         | Yes                | 0.10     | 0.02      | 4.28      | coefficient |
|                         | Very strong Strong | -1.50    | 0.02      | -79.77    | scale       |
|                         | Strong Moderate    | 0.48     | 0.02      | 29.47     | scale       |
|                         | Moderate Weak      | 2.46     | 0.02      | 100.62    | scale       |
|                         | Weak No influence  | 4.15     | 0.05      | 85.13     | scale       |
| brain_disease_caregiver | Yes                | 0.10     | 0.02      | 4.28      | coefficient |
|                         | Very strong Strong | -1.50    | 0.02      | -79.77    | scale       |

1  
2  
3  
4  
5  
6  
7  
8  
9  
10  
11  
12  
13  
14  
15  
16  
17  
18  
19  
20  
21  
22  
23  
24  
25  
26  
27  
28  
29  
30  
31  
32  
33  
34  
35  
36  
37  
38  
39  
40  
41  
42  
43  
44  
45  
46  
47  
48  
49  
50  
51  
52  
53  
54  
55  
56  
57  
58  
59  
60

For peer review only

## 1.3.4 Question 1: ordinal - Diet

| fct                     | term               | estimate | std.error | statistic | coef.type   |
|-------------------------|--------------------|----------|-----------|-----------|-------------|
| age                     | 41-60              | -0.42    | 0.02      | -17.02    | coefficient |
|                         | <= 40              | -0.53    | 0.03      | -16.22    | coefficient |
|                         | Very strong Strong | -1.45    | 0.02      | -73.97    | scale       |
|                         | Strong Moderate    | 0.69     | 0.02      | 38.82     | scale       |
|                         | Moderate Weak      | 2.84     | 0.03      | 91.06     | scale       |
|                         | Weak No influence  | 4.61     | 0.07      | 66.73     | scale       |
| education               | Lower              | 0.24     | 0.02      | 9.83      | coefficient |
|                         | Very strong Strong | -1.12    | 0.02      | -69.89    | scale       |
|                         | Strong Moderate    | 1.00     | 0.02      | 64.10     | scale       |
|                         | Moderate Weak      | 3.15     | 0.03      | 103.15    | scale       |
|                         | Weak No influence  | 4.91     | 0.07      | 71.39     | scale       |
| gender                  | Man                | 0.30     | 0.03      | 12.07     | coefficient |
|                         | Other/Undisclosed  | -0.10    | 0.17      | -0.60     | coefficient |
|                         | Very strong Strong | -1.11    | 0.02      | -70.49    | scale       |
|                         | Strong Moderate    | 1.01     | 0.02      | 65.61     | scale       |
|                         | Moderate Weak      | 3.16     | 0.03      | 103.75    | scale       |
| healthcare_experience   | Weak No influence  | 4.93     | 0.07      | 71.62     | scale       |
|                         | Yes                | -0.33    | 0.02      | -14.24    | coefficient |
|                         | Very strong Strong | -1.32    | 0.02      | -76.47    | scale       |
|                         | Strong Moderate    | 0.80     | 0.02      | 50.56     | scale       |
|                         | Moderate Weak      | 2.95     | 0.03      | 97.17     | scale       |
| cognitive_health        | Weak No influence  | 4.72     | 0.07      | 68.63     | scale       |
|                         | Below average      | 0.39     | 0.05      | 8.06      | coefficient |
|                         | Very strong Strong | -1.17    | 0.01      | -80.54    | scale       |
|                         | Strong Moderate    | 0.95     | 0.01      | 68.82     | scale       |
|                         | Moderate Weak      | 3.10     | 0.03      | 104.69    | scale       |
| mental_health           | Weak No influence  | 4.86     | 0.07      | 71.06     | scale       |
|                         | Below average      | 0.20     | 0.03      | 5.93      | coefficient |
|                         | Very strong Strong | -1.16    | 0.01      | -78.30    | scale       |
|                         | Strong Moderate    | 0.95     | 0.01      | 67.03     | scale       |
|                         | Moderate Weak      | 3.10     | 0.03      | 104.07    | scale       |
| illness_experience      | Weak No influence  | 4.86     | 0.07      | 70.99     | scale       |
|                         | Yes                | 0.10     | 0.02      | 4.22      | coefficient |
|                         | Very strong Strong | -1.15    | 0.02      | -68.03    | scale       |
|                         | Strong Moderate    | 0.96     | 0.02      | 58.79     | scale       |
|                         | Moderate Weak      | 3.11     | 0.03      | 100.68    | scale       |
| brain_disease_caregiver | Weak No influence  | 4.87     | 0.07      | 70.65     | scale       |
|                         | Yes                | -0.16    | 0.02      | -6.94     | coefficient |
|                         | Very strong Strong | -1.26    | 0.02      | -70.21    | scale       |
| brain_disease_caregiver | Strong Moderate    | 0.85     | 0.02      | 50.29     | scale       |
|                         | Moderate Weak      | 3.00     | 0.03      | 96.71     | scale       |

1  
2  
3  
4  
5  
6  
7  
8  
9  
10  
11  
12  
13  
14  
15  
16  
17  
18  
19  
20  
21  
22  
23  
24  
25  
26  
27  
28  
29  
30  
31  
32  
33  
34  
35  
36  
37  
38  
39  
40  
41  
42  
43  
44  
45  
46  
47  
48  
49  
50  
51  
52  
53  
54  
55  
56  
57  
58  
59  
60

For peer review only

## 1.3.5 Question 1: ordinal - Physical environment

| fct                     | term               | estimate | std.error | statistic | coef.type   |
|-------------------------|--------------------|----------|-----------|-----------|-------------|
| age                     | 41-60              | -0.20    | 0.02      | -8.20     | coefficient |
|                         | <= 40              | -0.13    | 0.03      | -3.99     | coefficient |
|                         | Very strong Strong | -1.17    | 0.02      | -62.60    | scale       |
|                         | Strong Moderate    | 0.84     | 0.02      | 46.96     | scale       |
|                         | Moderate Weak      | 3.06     | 0.03      | 93.95     | scale       |
|                         | Weak No influence  | 5.48     | 0.10      | 55.39     | scale       |
| education               | Lower              | -0.06    | 0.02      | -2.28     | coefficient |
|                         | Very strong Strong | -1.09    | 0.02      | -68.64    | scale       |
|                         | Strong Moderate    | 0.92     | 0.02      | 59.88     | scale       |
|                         | Moderate Weak      | 3.14     | 0.03      | 100.07    | scale       |
|                         | Weak No influence  | 5.55     | 0.10      | 56.38     | scale       |
| gender                  | Man                | 0.16     | 0.02      | 6.41      | coefficient |
|                         | Other/Undisclosed  | -0.29    | 0.17      | -1.72     | coefficient |
|                         | Very strong Strong | -1.03    | 0.02      | -66.41    | scale       |
|                         | Strong Moderate    | 0.98     | 0.02      | 64.11     | scale       |
|                         | Moderate Weak      | 3.20     | 0.03      | 101.87    | scale       |
|                         | Weak No influence  | 5.62     | 0.10      | 57.01     | scale       |
| healthcare_experience   | Yes                | -0.19    | 0.02      | -8.16     | coefficient |
|                         | Very strong Strong | -1.14    | 0.02      | -68.64    | scale       |
|                         | Strong Moderate    | 0.87     | 0.02      | 54.34     | scale       |
|                         | Moderate Weak      | 3.09     | 0.03      | 97.71     | scale       |
|                         | Weak No influence  | 5.50     | 0.10      | 55.82     | scale       |
| cognitive_health        | Below average      | 0.19     | 0.05      | 3.84      | coefficient |
|                         | Very strong Strong | -1.06    | 0.01      | -75.12    | scale       |
|                         | Strong Moderate    | 0.95     | 0.01      | 68.97     | scale       |
|                         | Moderate Weak      | 3.17     | 0.03      | 103.33    | scale       |
|                         | Weak No influence  | 5.58     | 0.10      | 56.80     | scale       |
| mental_health           | Below average      | 0.07     | 0.03      | 2.05      | coefficient |
|                         | Very strong Strong | -1.06    | 0.01      | -73.20    | scale       |
|                         | Strong Moderate    | 0.95     | 0.01      | 66.89     | scale       |
|                         | Moderate Weak      | 3.16     | 0.03      | 102.66    | scale       |
|                         | Weak No influence  | 5.58     | 0.10      | 56.74     | scale       |
| illness_experience      | Yes                | -0.13    | 0.02      | -5.86     | coefficient |
|                         | Very strong Strong | -1.12    | 0.02      | -66.98    | scale       |
|                         | Strong Moderate    | 0.88     | 0.02      | 54.73     | scale       |
|                         | Moderate Weak      | 3.10     | 0.03      | 97.86     | scale       |
|                         | Weak No influence  | 5.52     | 0.10      | 55.96     | scale       |
| brain_disease_caregiver | Yes                | -0.04    | 0.02      | -1.69     | coefficient |
|                         | Very strong Strong | -1.09    | 0.02      | -62.46    | scale       |
|                         | Strong Moderate    | 0.92     | 0.02      | 54.10     | scale       |
|                         | Moderate Weak      | 3.14     | 0.03      | 97.48     | scale       |

1  
2  
3  
4  
5  
6  
7  
8  
9  
10  
11  
12  
13  
14  
15  
16  
17  
18  
19  
20  
21  
22  
23  
24  
25  
26  
27  
28  
29  
30  
31  
32  
33  
34  
35  
36  
37  
38  
39  
40  
41  
42  
43  
44  
45  
46  
47  
48  
49  
50  
51  
52  
53  
54  
55  
56  
57  
58  
59  
60

For peer review only

## 1.3.6 Question 1: ordinal - Life goals

| fct                     | term               | estimate | std.error | statistic | coef.type   |
|-------------------------|--------------------|----------|-----------|-----------|-------------|
| age                     | 41-60              | -0.02    | 0.02      | -0.88     | coefficient |
|                         | <= 40              | 0.17     | 0.03      | 5.32      | coefficient |
|                         | Very strong Strong | -1.01    | 0.02      | -55.68    | scale       |
|                         | Strong Moderate    | 1.00     | 0.02      | 55.54     | scale       |
|                         | Moderate Weak      | 2.92     | 0.03      | 98.26     | scale       |
|                         | Weak No influence  | 4.63     | 0.06      | 74.47     | scale       |
| education               | Lower              | 0.08     | 0.02      | 3.26      | coefficient |
|                         | Very strong Strong | -1.00    | 0.02      | -64.24    | scale       |
|                         | Strong Moderate    | 1.01     | 0.02      | 64.62     | scale       |
|                         | Moderate Weak      | 2.93     | 0.03      | 103.62    | scale       |
|                         | Weak No influence  | 4.63     | 0.06      | 75.38     | scale       |
| gender                  | Man                | 0.13     | 0.02      | 5.35      | coefficient |
|                         | Other/Undisclosed  | -0.06    | 0.17      | -0.35     | coefficient |
|                         | Very strong Strong | -0.99    | 0.02      | -64.50    | scale       |
|                         | Strong Moderate    | 1.02     | 0.02      | 66.35     | scale       |
|                         | Moderate Weak      | 2.94     | 0.03      | 104.41    | scale       |
| healthcare_experience   | Weak No influence  | 4.65     | 0.06      | 75.65     | scale       |
|                         | Yes                | -0.24    | 0.02      | -10.53    | coefficient |
|                         | Very strong Strong | -1.12    | 0.02      | -67.64    | scale       |
|                         | Strong Moderate    | 0.89     | 0.02      | 55.81     | scale       |
|                         | Moderate Weak      | 2.81     | 0.03      | 99.32     | scale       |
| cognitive_health        | Weak No influence  | 4.52     | 0.06      | 73.52     | scale       |
|                         | Below average      | 0.10     | 0.05      | 2.06      | coefficient |
|                         | Very strong Strong | -1.02    | 0.01      | -73.06    | scale       |
|                         | Strong Moderate    | 0.99     | 0.01      | 71.40     | scale       |
|                         | Moderate Weak      | 2.91     | 0.03      | 106.49    | scale       |
| mental_health           | Weak No influence  | 4.61     | 0.06      | 75.60     | scale       |
|                         | Below average      | 0.11     | 0.03      | 3.12      | coefficient |
|                         | Very strong Strong | -1.01    | 0.01      | -70.80    | scale       |
|                         | Strong Moderate    | 1.00     | 0.01      | 70.04     | scale       |
|                         | Moderate Weak      | 2.92     | 0.03      | 105.90    | scale       |
| illness_experience      | Weak No influence  | 4.62     | 0.06      | 75.60     | scale       |
|                         | Yes                | -0.04    | 0.02      | -1.74     | coefficient |
|                         | Very strong Strong | -1.04    | 0.02      | -63.01    | scale       |
|                         | Strong Moderate    | 0.97     | 0.02      | 59.31     | scale       |
|                         | Moderate Weak      | 2.89     | 0.03      | 100.89    | scale       |
| brain_disease_caregiver | Weak No influence  | 4.59     | 0.06      | 74.51     | scale       |
|                         | Yes                | 0.03     | 0.02      | 1.45      | coefficient |
|                         | Very strong Strong | -1.01    | 0.02      | -58.85    | scale       |
| brain_disease_caregiver | Strong Moderate    | 1.00     | 0.02      | 58.29     | scale       |
|                         | Moderate Weak      | 2.92     | 0.03      | 100.18    | scale       |



1  
2  
3  
4  
5  
6  
7  
8  
9  
10  
11  
12  
13  
14  
15  
16  
17  
18  
19  
20  
21  
22  
23  
24  
25  
26  
27  
28  
29  
30  
31  
32  
33  
34  
35  
36  
37  
38  
39  
40  
41  
42  
43  
44  
45  
46  
47  
48  
49  
50  
51  
52  
53  
54  
55  
56  
57  
58  
59  
60

For peer review only

## 1.3.7 Question 1: ordinal - Social environment

| fct                     | term               | estimate | std.error | statistic | coef.type   |
|-------------------------|--------------------|----------|-----------|-----------|-------------|
| age                     | 41-60              | -0.31    | 0.03      | -12.49    | coefficient |
|                         | <= 40              | -0.69    | 0.03      | -20.60    | coefficient |
|                         | Very strong Strong | -0.87    | 0.02      | -47.81    | scale       |
|                         | Strong Moderate    | 1.36     | 0.02      | 69.53     | scale       |
|                         | Moderate Weak      | 3.53     | 0.04      | 85.29     | scale       |
|                         | Weak No influence  | 5.54     | 0.11      | 51.62     | scale       |
| education               | Lower              | 0.14     | 0.02      | 5.87      | coefficient |
|                         | Very strong Strong | -0.58    | 0.01      | -39.71    | scale       |
|                         | Strong Moderate    | 1.61     | 0.02      | 90.26     | scale       |
|                         | Moderate Weak      | 3.78     | 0.04      | 92.66     | scale       |
|                         | Weak No influence  | 5.79     | 0.11      | 54.05     | scale       |
| gender                  | Man                | 0.26     | 0.03      | 10.44     | coefficient |
|                         | Other/Undisclosed  | -0.49    | 0.17      | -2.88     | coefficient |
|                         | Very strong Strong | -0.56    | 0.01      | -38.71    | scale       |
|                         | Strong Moderate    | 1.64     | 0.02      | 92.34     | scale       |
|                         | Moderate Weak      | 3.82     | 0.04      | 93.46     | scale       |
| healthcare_experience   | Weak No influence  | 5.82     | 0.11      | 54.36     | scale       |
|                         | Yes                | -0.33    | 0.02      | -14.11    | coefficient |
|                         | Very strong Strong | -0.76    | 0.02      | -47.99    | scale       |
|                         | Strong Moderate    | 1.45     | 0.02      | 80.46     | scale       |
|                         | Moderate Weak      | 3.62     | 0.04      | 88.81     | scale       |
| cognitive_health        | Weak No influence  | 5.63     | 0.11      | 52.55     | scale       |
|                         | Below average      | 0.28     | 0.05      | 5.79      | coefficient |
|                         | Very strong Strong | -0.61    | 0.01      | -47.36    | scale       |
|                         | Strong Moderate    | 1.58     | 0.02      | 97.31     | scale       |
|                         | Moderate Weak      | 3.76     | 0.04      | 93.54     | scale       |
| mental_health           | Weak No influence  | 5.76     | 0.11      | 53.92     | scale       |
|                         | Below average      | -0.12    | 0.03      | -3.44     | coefficient |
|                         | Very strong Strong | -0.64    | 0.01      | -47.92    | scale       |
|                         | Strong Moderate    | 1.55     | 0.02      | 94.06     | scale       |
|                         | Moderate Weak      | 3.72     | 0.04      | 92.56     | scale       |
| illness_experience      | Weak No influence  | 5.73     | 0.11      | 53.59     | scale       |
|                         | Yes                | 0.04     | 0.02      | 1.55      | coefficient |
|                         | Very strong Strong | -0.61    | 0.02      | -39.10    | scale       |
|                         | Strong Moderate    | 1.58     | 0.02      | 85.29     | scale       |
|                         | Moderate Weak      | 3.75     | 0.04      | 91.26     | scale       |
| brain_disease_caregiver | Weak No influence  | 5.76     | 0.11      | 53.69     | scale       |
|                         | Yes                | -0.02    | 0.02      | -0.99     | coefficient |
|                         | Very strong Strong | -0.64    | 0.02      | -38.63    | scale       |
| brain_disease_caregiver | Strong Moderate    | 1.56     | 0.02      | 81.28     | scale       |
|                         | Moderate Weak      | 3.73     | 0.04      | 90.09     | scale       |

1  
2  
3  
4  
5  
6  
7  
8  
9  
10  
11  
12  
13  
14  
15  
16  
17  
18  
19  
20  
21  
22  
23  
24  
25  
26  
27  
28  
29  
30  
31  
32  
33  
34  
35  
36  
37  
38  
39  
40  
41  
42  
43  
44  
45  
46  
47  
48  
49  
50  
51  
52  
53  
54  
55  
56  
57  
58  
59  
60

For peer review only

## 1.3.8 Question 1: ordinal - Sleeping habits

| fct                     | term               | estimate | std.error | statistic | coef.type   |
|-------------------------|--------------------|----------|-----------|-----------|-------------|
| age                     | 41-60              | -0.74    | 0.03      | -28.81    | coefficient |
|                         | <= 40              | -1.14    | 0.03      | -33.41    | coefficient |
|                         | Very strong Strong | -1.07    | 0.02      | -56.79    | scale       |
|                         | Strong Moderate    | 1.35     | 0.02      | 67.92     | scale       |
|                         | Moderate Weak      | 3.69     | 0.05      | 77.33     | scale       |
|                         | Weak No influence  | 5.44     | 0.11      | 49.04     | scale       |
| education               | Lower              | 0.15     | 0.02      | 6.24      | coefficient |
|                         | Very strong Strong | -0.53    | 0.01      | -36.39    | scale       |
|                         | Strong Moderate    | 1.79     | 0.02      | 95.26     | scale       |
|                         | Moderate Weak      | 4.11     | 0.05      | 86.58     | scale       |
| gender                  | Weak No influence  | 5.86     | 0.11      | 52.86     | scale       |
|                         | Man                | 0.32     | 0.03      | 12.44     | coefficient |
|                         | Other/Undisclosed  | -0.14    | 0.17      | -0.85     | coefficient |
|                         | Very strong Strong | -0.50    | 0.01      | -34.50    | scale       |
|                         | Strong Moderate    | 1.84     | 0.02      | 97.66     | scale       |
|                         | Moderate Weak      | 4.16     | 0.05      | 87.53     | scale       |
| healthcare_experience   | Weak No influence  | 5.91     | 0.11      | 53.29     | scale       |
|                         | Yes                | -0.27    | 0.02      | -11.54    | coefficient |
|                         | Very strong Strong | -0.69    | 0.02      | -43.78    | scale       |
|                         | Strong Moderate    | 1.64     | 0.02      | 86.84     | scale       |
|                         | Moderate Weak      | 3.97     | 0.05      | 83.53     | scale       |
| cognitive_health        | Weak No influence  | 5.71     | 0.11      | 51.54     | scale       |
|                         | Below average      | -0.13    | 0.05      | -2.56     | coefficient |
|                         | Very strong Strong | -0.59    | 0.01      | -45.60    | scale       |
|                         | Strong Moderate    | 1.73     | 0.02      | 101.12    | scale       |
|                         | Moderate Weak      | 4.05     | 0.05      | 86.56     | scale       |
| mental_health           | Weak No influence  | 5.80     | 0.11      | 52.47     | scale       |
|                         | Below average      | -0.33    | 0.03      | -9.68     | coefficient |
|                         | Very strong Strong | -0.63    | 0.01      | -46.59    | scale       |
|                         | Strong Moderate    | 1.70     | 0.02      | 97.95     | scale       |
|                         | Moderate Weak      | 4.02     | 0.05      | 85.77     | scale       |
| illness_experience      | Weak No influence  | 5.77     | 0.11      | 52.17     | scale       |
|                         | Yes                | -0.11    | 0.02      | -4.68     | coefficient |
|                         | Very strong Strong | -0.63    | 0.02      | -39.62    | scale       |
|                         | Strong Moderate    | 1.70     | 0.02      | 88.30     | scale       |
|                         | Moderate Weak      | 4.02     | 0.05      | 84.40     | scale       |
| brain_disease_caregiver | Weak No influence  | 5.77     | 0.11      | 51.99     | scale       |
|                         | Yes                | 0.10     | 0.02      | 4.43      | coefficient |
|                         | Very strong Strong | -0.53    | 0.02      | -32.47    | scale       |
| brain_disease_caregiver | Strong Moderate    | 1.79     | 0.02      | 88.46     | scale       |
|                         | Moderate Weak      | 4.11     | 0.05      | 85.51     | scale       |

1  
2  
3  
4  
5  
6  
7  
8  
9  
10  
11  
12  
13  
14  
15  
16  
17  
18  
19  
20  
21  
22  
23  
24  
25  
26  
27  
28  
29  
30  
31  
32  
33  
34  
35  
36  
37  
38  
39  
40  
41  
42  
43  
44  
45  
46  
47  
48  
49  
50  
51  
52  
53  
54  
55  
56  
57  
58  
59  
60

For peer review only

## 1.3.9 Question 1: ordinal - Physical health

| fct                     | term               | estimate | std.error | statistic | coef.type   |
|-------------------------|--------------------|----------|-----------|-----------|-------------|
| age                     | 41-60              | -0.20    | 0.03      | -7.91     | coefficient |
|                         | <= 40              | -0.27    | 0.03      | -8.06     | coefficient |
|                         | Very strong Strong | -0.67    | 0.02      | -37.75    | scale       |
|                         | Strong Moderate    | 1.83     | 0.02      | 84.28     | scale       |
|                         | Moderate Weak      | 4.04     | 0.05      | 80.42     | scale       |
|                         | Weak No influence  | 5.95     | 0.13      | 47.31     | scale       |
| education               | Lower              | 0.31     | 0.03      | 12.46     | coefficient |
|                         | Very strong Strong | -0.46    | 0.01      | -31.42    | scale       |
|                         | Strong Moderate    | 2.05     | 0.02      | 101.07    | scale       |
|                         | Moderate Weak      | 4.26     | 0.05      | 85.72     | scale       |
|                         | Weak No influence  | 6.17     | 0.13      | 49.15     | scale       |
| gender                  | Man                | 0.17     | 0.03      | 6.76      | coefficient |
|                         | Other/Undisclosed  | -0.01    | 0.17      | -0.07     | coefficient |
|                         | Very strong Strong | -0.51    | 0.01      | -35.05    | scale       |
|                         | Strong Moderate    | 1.99     | 0.02      | 100.46    | scale       |
|                         | Moderate Weak      | 4.20     | 0.05      | 84.92     | scale       |
|                         | Weak No influence  | 6.11     | 0.13      | 48.73     | scale       |
| healthcare_experience   | Yes                | -0.33    | 0.02      | -13.88    | coefficient |
|                         | Very strong Strong | -0.69    | 0.02      | -43.32    | scale       |
|                         | Strong Moderate    | 1.82     | 0.02      | 91.10     | scale       |
|                         | Moderate Weak      | 4.03     | 0.05      | 81.55     | scale       |
|                         | Weak No influence  | 5.94     | 0.13      | 47.40     | scale       |
| cognitive_health        | Below average      | 0.41     | 0.05      | 8.22      | coefficient |
|                         | Very strong Strong | -0.53    | 0.01      | -41.47    | scale       |
|                         | Strong Moderate    | 1.97     | 0.02      | 105.97    | scale       |
|                         | Moderate Weak      | 4.18     | 0.05      | 85.31     | scale       |
|                         | Weak No influence  | 6.09     | 0.13      | 48.63     | scale       |
| mental_health           | Below average      | 0.19     | 0.03      | 5.38      | coefficient |
|                         | Very strong Strong | -0.53    | 0.01      | -39.99    | scale       |
|                         | Strong Moderate    | 1.97     | 0.02      | 104.22    | scale       |
|                         | Moderate Weak      | 4.18     | 0.05      | 85.07     | scale       |
|                         | Weak No influence  | 6.09     | 0.13      | 48.59     | scale       |
| illness_experience      | Yes                | 0.13     | 0.02      | 5.53      | coefficient |
|                         | Very strong Strong | -0.50    | 0.02      | -32.13    | scale       |
|                         | Strong Moderate    | 2.00     | 0.02      | 96.25     | scale       |
|                         | Moderate Weak      | 4.20     | 0.05      | 84.34     | scale       |
|                         | Weak No influence  | 6.11     | 0.13      | 48.69     | scale       |
| brain_disease_caregiver | Yes                | -0.12    | 0.02      | -5.03     | coefficient |
|                         | Very strong Strong | -0.61    | 0.02      | -36.60    | scale       |
|                         | Strong Moderate    | 1.89     | 0.02      | 89.99     | scale       |
|                         | Moderate Weak      | 4.10     | 0.05      | 82.10     | scale       |

1  
2  
3  
4  
5  
6  
7  
8  
9  
10  
11  
12  
13  
14  
15  
16  
17  
18  
19  
20  
21  
22  
23  
24  
25  
26  
27  
28  
29  
30  
31  
32  
33  
34  
35  
36  
37  
38  
39  
40  
41  
42  
43  
44  
45  
46  
47  
48  
49  
50  
51  
52  
53  
54  
55  
56  
57  
58  
59  
60

For peer review only

## 1.3.10 Question 1: ordinal - Genetics

| fct                     | term               | estimate | std.error | statistic | coef.type   |
|-------------------------|--------------------|----------|-----------|-----------|-------------|
| age                     | 41-60              | -0.06    | 0.02      | -2.43     | coefficient |
|                         | <= 40              | 0.26     | 0.03      | 8.02      | coefficient |
|                         | Very strong Strong | -0.48    | 0.02      | -27.58    | scale       |
|                         | Strong Moderate    | 1.56     | 0.02      | 78.11     | scale       |
|                         | Moderate Weak      | 3.74     | 0.04      | 90.21     | scale       |
|                         | Weak No influence  | 5.52     | 0.10      | 58.01     | scale       |
| education               | Lower              | 0.04     | 0.02      | 1.68      | coefficient |
|                         | Very strong Strong | -0.48    | 0.01      | -33.17    | scale       |
|                         | Strong Moderate    | 1.55     | 0.02      | 88.31     | scale       |
|                         | Moderate Weak      | 3.72     | 0.04      | 92.50     | scale       |
|                         | Weak No influence  | 5.50     | 0.09      | 58.18     | scale       |
| gender                  | Man                | 0.20     | 0.03      | 8.11      | coefficient |
|                         | Other/Undisclosed  | 0.72     | 0.17      | 4.28      | coefficient |
|                         | Very strong Strong | -0.44    | 0.01      | -30.60    | scale       |
|                         | Strong Moderate    | 1.61     | 0.02      | 91.27     | scale       |
|                         | Moderate Weak      | 3.78     | 0.04      | 93.72     | scale       |
| healthcare_experience   | Weak No influence  | 5.56     | 0.09      | 58.73     | scale       |
|                         | Yes                | -0.08    | 0.02      | -3.46     | coefficient |
|                         | Very strong Strong | -0.53    | 0.02      | -34.26    | scale       |
|                         | Strong Moderate    | 1.51     | 0.02      | 83.44     | scale       |
|                         | Moderate Weak      | 3.68     | 0.04      | 90.99     | scale       |
| cognitive_health        | Weak No influence  | 5.46     | 0.09      | 57.67     | scale       |
|                         | Below average      | 0.07     | 0.05      | 1.43      | coefficient |
|                         | Very strong Strong | -0.49    | 0.01      | -38.60    | scale       |
|                         | Strong Moderate    | 1.55     | 0.02      | 96.07     | scale       |
|                         | Moderate Weak      | 3.71     | 0.04      | 93.77     | scale       |
| mental_health           | Weak No influence  | 5.49     | 0.09      | 58.25     | scale       |
|                         | Below average      | -0.07    | 0.03      | -1.98     | coefficient |
|                         | Very strong Strong | -0.50    | 0.01      | -38.23    | scale       |
|                         | Strong Moderate    | 1.53     | 0.02      | 93.54     | scale       |
|                         | Moderate Weak      | 3.70     | 0.04      | 93.19     | scale       |
| illness_experience      | Weak No influence  | 5.48     | 0.09      | 58.09     | scale       |
|                         | Yes                | -0.06    | 0.02      | -2.63     | coefficient |
|                         | Very strong Strong | -0.52    | 0.02      | -33.45    | scale       |
|                         | Strong Moderate    | 1.52     | 0.02      | 83.06     | scale       |
|                         | Moderate Weak      | 3.69     | 0.04      | 90.97     | scale       |
| brain_disease_caregiver | Weak No influence  | 5.47     | 0.09      | 57.72     | scale       |
|                         | Yes                | -0.33    | 0.02      | -14.68    | coefficient |
|                         | Very strong Strong | -0.66    | 0.02      | -30.48    | scale       |
| brain_disease_caregiver | Strong Moderate    | 1.39     | 0.02      | 74.82     | scale       |
|                         | Moderate Weak      | 3.57     | 0.04      | 87.86     | scale       |



1  
2  
3  
4  
5  
6  
7  
8  
9  
10  
11  
12  
13  
14  
15  
16  
17  
18  
19  
20  
21  
22  
23  
24  
25  
26  
27  
28  
29  
30  
31  
32  
33  
34  
35  
36  
37  
38  
39  
40  
41  
42  
43  
44  
45  
46  
47  
48  
49  
50  
51  
52  
53  
54  
55  
56  
57  
58  
59  
60

For peer review only

## 1.3.11 Question 1: ordinal - Substance use

| fct                     | term               | estimate | std.error | statistic | coef.type   |
|-------------------------|--------------------|----------|-----------|-----------|-------------|
| age                     | 41-60              | -0.39    | 0.03      | -14.67    | coefficient |
|                         | <= 40              | -0.34    | 0.04      | -9.72     | coefficient |
|                         | Very strong Strong | 0.24     | 0.02      | 13.80     | scale       |
|                         | Strong Moderate    | 2.30     | 0.03      | 90.13     | scale       |
|                         | Moderate Weak      | 3.83     | 0.05      | 81.10     | scale       |
|                         | Weak No influence  | 4.46     | 0.06      | 70.54     | scale       |
| education               | Lower              | 0.09     | 0.03      | 3.35      | coefficient |
|                         | Very strong Strong | 0.47     | 0.01      | 31.82     | scale       |
|                         | Strong Moderate    | 2.52     | 0.02      | 104.15    | scale       |
|                         | Moderate Weak      | 4.05     | 0.05      | 86.84     | scale       |
|                         | Weak No influence  | 4.68     | 0.06      | 74.48     | scale       |
| gender                  | Man                | 0.29     | 0.03      | 10.73     | coefficient |
|                         | Other/Undisclosed  | 0.43     | 0.18      | 2.47      | coefficient |
|                         | Very strong Strong | 0.53     | 0.01      | 35.98     | scale       |
|                         | Strong Moderate    | 2.58     | 0.02      | 106.26    | scale       |
|                         | Moderate Weak      | 4.11     | 0.05      | 88.06     | scale       |
| healthcare_experience   | Weak No influence  | 4.74     | 0.06      | 75.43     | scale       |
|                         | Yes                | -0.28    | 0.03      | -10.92    | coefficient |
|                         | Very strong Strong | 0.34     | 0.02      | 21.93     | scale       |
|                         | Strong Moderate    | 2.39     | 0.02      | 98.36     | scale       |
|                         | Moderate Weak      | 3.92     | 0.05      | 84.11     | scale       |
| cognitive_health        | Weak No influence  | 4.55     | 0.06      | 72.47     | scale       |
|                         | Below average      | 0.37     | 0.05      | 7.45      | coefficient |
|                         | Very strong Strong | 0.47     | 0.01      | 36.63     | scale       |
|                         | Strong Moderate    | 2.52     | 0.02      | 109.46    | scale       |
|                         | Moderate Weak      | 4.05     | 0.05      | 87.95     | scale       |
| mental_health           | Weak No influence  | 4.67     | 0.06      | 75.00     | scale       |
|                         | Below average      | 0.07     | 0.04      | 1.99      | coefficient |
|                         | Very strong Strong | 0.45     | 0.01      | 34.30     | scale       |
|                         | Strong Moderate    | 2.50     | 0.02      | 107.73    | scale       |
|                         | Moderate Weak      | 4.03     | 0.05      | 87.40     | scale       |
| illness_experience      | Weak No influence  | 4.66     | 0.06      | 74.64     | scale       |
|                         | Yes                | 0.09     | 0.02      | 3.69      | coefficient |
|                         | Very strong Strong | 0.48     | 0.02      | 30.25     | scale       |
|                         | Strong Moderate    | 2.53     | 0.02      | 101.57    | scale       |
|                         | Moderate Weak      | 4.06     | 0.05      | 86.36     | scale       |
| brain_disease_caregiver | Weak No influence  | 4.68     | 0.06      | 74.31     | scale       |
|                         | Yes                | 0.00     | 0.02      | 0.08      | coefficient |
|                         | Very strong Strong | 0.45     | 0.01      | 34.55     | scale       |
| brain_disease_caregiver | Strong Moderate    | 2.49     | 0.03      | 98.15     | scale       |
|                         | Moderate Weak      | 4.02     | 0.05      | 85.15     | scale       |

1  
2  
3  
4  
5  
6  
7  
8  
9  
10  
11  
12  
13  
14  
15  
16  
17  
18  
19  
20  
21  
22  
23  
24  
25  
26  
27  
28  
29  
30  
31  
32  
33  
34  
35  
36  
37  
38  
39  
40  
41  
42  
43  
44  
45  
46  
47  
48  
49  
50  
51  
52  
53  
54  
55  
56  
57  
58  
59  
60

1.4 bin\_vs\_cont

For peer review only

## 1.4.1 Question 1: bin\_vs\_cont - Income

| fct                          | term                  | log_odds | std.error | statistic | p.value | cont_term         | con |
|------------------------------|-----------------------|----------|-----------|-----------|---------|-------------------|-----|
| age                          | 41-60                 | -0.02    | 0.03      | -0.87     | 0.38    | 41-60             |     |
|                              | <= 40                 | -0.21    | 0.04      | -5.81     | 0.00    | <= 40             |     |
| education                    | Lower                 | 0.10     | 0.03      | 3.86      | 0.00    | Lower             |     |
|                              | Man                   | -0.05    | 0.03      | -1.88     | 0.06    | Man               |     |
| gender                       | Other/Undisclosed     | 0.17     | 0.18      | 0.93      | 0.35    | Other/Undisclosed |     |
|                              | healthcare_experience | Yes      | 0.27      | 0.03      | 10.31   | 0.00              | Yes |
| illness_experience           | Yes                   | 0.14     | 0.03      | 5.57      | 0.00    | Yes               |     |
| brain_disease_caregiver      | Yes                   | 0.04     | 0.03      | 1.58      | 0.11    | Yes               |     |
| brain_research_participation | Yes                   | 0.05     | 0.03      | 2.11      | 0.03    | Yes               |     |

## 1.4.2 Question 1: bin\_vs\_cont - Profession

| fct                          | term              | log_odds | std.error | statistic | p.value | cont_term         | con |
|------------------------------|-------------------|----------|-----------|-----------|---------|-------------------|-----|
|                              | 41-60             | 0.15     | 0.03      | 5.61      | 0.00    | 41-60             |     |
| age                          | <= 40             | 0.29     | 0.04      | 8.08      | 0.00    | <= 40             |     |
| education                    | Lower             | -0.28    | 0.03      | -10.78    | 0.00    | Lower             |     |
|                              | Man               | 0.17     | 0.03      | 6.11      | 0.00    | Man               |     |
| gender                       | Other/Undisclosed | -0.01    | 0.18      | -0.07     | 0.95    | Other/Undisclosed |     |
| healthcare_experience        | Yes               | 0.20     | 0.03      | 8.10      | 0.00    | Yes               |     |
| cognitive_health             | Below average     | -0.20    | 0.05      | -3.92     | 0.00    | Below average     |     |
| mental_health                | Below average     | -0.13    | 0.04      | -3.69     | 0.00    | Below average     |     |
| illness_experience           | Yes               | -0.06    | 0.02      | -2.38     | 0.02    | Yes               |     |
| brain_disease_caregiver      | Yes               | -0.12    | 0.02      | -4.94     | 0.00    | Yes               |     |
| brain_research_participation | Yes               | -0.14    | 0.02      | -5.77     | 0.00    | Yes               |     |
| relationship                 | Stable            | -0.02    | 0.02      | -0.86     | 0.39    | Stable            |     |

## 1.4.3 Question 1: bin\_vs\_cont - Education

| fct                          | term              | log_odds | std.error | statistic | p.value | cont_term         | con |
|------------------------------|-------------------|----------|-----------|-----------|---------|-------------------|-----|
|                              | 41-60             | -0.07    | 0.03      | -2.57     | 0.01    | 41-60             |     |
| age                          | <= 40             | 0.11     | 0.04      | 2.97      | 0.00    | <= 40             |     |
| education                    | Lower             | -0.48    | 0.03      | -18.32    | 0.00    | Lower             |     |
|                              | Man               | 0.12     | 0.03      | 4.40      | 0.00    | Man               |     |
| gender                       | Other/Undisclosed | 0.20     | 0.19      | 1.09      | 0.28    | Other/Undisclosed |     |
| healthcare_experience        | Yes               | 0.29     | 0.03      | 11.23     | 0.00    | Yes               |     |
| cognitive_health             | Below average     | -0.39    | 0.05      | -7.57     | 0.00    | Below average     |     |
| mental_health                | Below average     | -0.33    | 0.04      | -9.05     | 0.00    | Below average     |     |
| illness_experience           | Yes               | -0.10    | 0.03      | -4.03     | 0.00    | Yes               |     |
| brain_disease_caregiver      | Yes               | -0.08    | 0.02      | -3.40     | 0.00    | Yes               |     |
| brain_research_participation | Yes               | -0.02    | 0.02      | -0.61     | 0.54    | Yes               |     |

## 1.4.4 Question 1: bin\_vs\_cont - Diet

| fct                          | term          | log_odds | std.error | statistic | p.value | cont_term     | cont_beta |
|------------------------------|---------------|----------|-----------|-----------|---------|---------------|-----------|
| age                          | 41-60         | 0.43     | 0.03      | 14.59     | 0.00    | 41-60         | -0.19     |
|                              | <= 40         | 0.47     | 0.04      | 11.71     | 0.00    | <= 40         | -0.24     |
| education                    | Lower         | -0.24    | 0.03      | -8.44     | 0.00    | Lower         | 0.12      |
| gender                       | Man           | -0.36    | 0.03      | -12.40    | 0.00    | Man           | 0.14      |
| healthcare_experience        | Yes           | 0.33     | 0.03      | 11.70     | 0.00    | Yes           | -0.14     |
| cognitive_health             | Below average | -0.46    | 0.05      | -8.67     | 0.00    | Below average | 0.18      |
| mental_health                | Below average | -0.26    | 0.04      | -6.77     | 0.00    | Below average | 0.09      |
| illness_experience           | Yes           | -0.13    | 0.03      | -4.76     | 0.00    | Yes           | 0.05      |
| brain_disease_caregiver      | Yes           | 0.17     | 0.03      | 6.29      | 0.00    | Yes           | -0.07     |
| brain_research_participation | Yes           | 0.04     | 0.03      | 1.59      | 0.11    | Yes           | -0.02     |
| relationship                 | Stable        | -0.04    | 0.03      | -1.41     | 0.16    | Stable        | 0.03      |

## 1.4.5 Question 1: bin\_vs\_cont - Physical environment

| fct                          | term              | log_odds | std.error | statistic | p.value | cont_term         | con |
|------------------------------|-------------------|----------|-----------|-----------|---------|-------------------|-----|
| age                          | 41-60             | 0.23     | 0.03      | 7.59      | 0.00    | 41-60             |     |
|                              | <= 40             | 0.09     | 0.04      | 2.42      | 0.02    | <= 40             |     |
| education                    | Lower             | 0.06     | 0.03      | 1.90      | 0.06    | Lower             |     |
| gender                       | Man               | -0.15    | 0.03      | -5.16     | 0.00    | Man               |     |
|                              | Other/Undisclosed | 0.27     | 0.21      | 1.27      | 0.20    | Other/Undisclosed |     |
| healthcare_experience        | Yes               | 0.17     | 0.03      | 6.27      | 0.00    | Yes               |     |
| cognitive_health             | Below average     | -0.23    | 0.05      | -4.22     | 0.00    | Below average     |     |
| mental_health                | Below average     | -0.09    | 0.04      | -2.29     | 0.02    | Below average     |     |
| illness_experience           | Yes               | 0.13     | 0.03      | 4.88      | 0.00    | Yes               |     |
| brain_disease_caregiver      | Yes               | 0.03     | 0.03      | 1.25      | 0.21    | Yes               |     |
| brain_research_participation | Yes               | 0.02     | 0.03      | 0.65      | 0.52    | Yes               |     |
| relationship                 | Stable            | -0.07    | 0.03      | -2.46     | 0.01    | Stable            |     |



## 1.4.6 Question 1: bin\_vs\_cont - Life goals

| fct                          | term              | log_odds | std.error | statistic | p.value | cont_term         | con |
|------------------------------|-------------------|----------|-----------|-----------|---------|-------------------|-----|
| age                          | <= 40             | -0.34    | 0.04      | -9.10     | 0.00    | <= 40             |     |
| education                    | Lower             | -0.06    | 0.03      | -2.21     | 0.03    | Lower             |     |
| gender                       | Man               | -0.12    | 0.03      | -4.00     | 0.00    | Man               |     |
|                              | Other/Undisclosed | -0.13    | 0.20      | -0.66     | 0.51    | Other/Undisclosed |     |
| healthcare_experience        | Yes               | 0.24     | 0.03      | 8.66      | 0.00    | Yes               |     |
| cognitive_health             | Below average     | -0.10    | 0.06      | -1.75     | 0.08    | Below average     |     |
| mental_health                | Below average     | -0.22    | 0.04      | -5.74     | 0.00    | Below average     |     |
| illness_experience           | Yes               | 0.03     | 0.03      | 1.12      | 0.26    | Yes               |     |
| brain_disease_caregiver      | Yes               | -0.04    | 0.03      | -1.44     | 0.15    | Yes               |     |
| brain_research_participation | Yes               | -0.14    | 0.03      | -5.19     | 0.00    | Yes               |     |

## 1.4.7 Question 1: bin\_vs\_cont - Social environment

| fct                          | term              | log_odds | std.error | statistic | p.value | cont_term         | con |
|------------------------------|-------------------|----------|-----------|-----------|---------|-------------------|-----|
| age                          | 41-60             | 0.29     | 0.03      | 8.18      | 0.00    | 41-60             |     |
|                              | <= 40             | 0.55     | 0.05      | 10.93     | 0.00    | <= 40             |     |
| education                    | Lower             | -0.18    | 0.03      | -5.46     | 0.00    | Lower             |     |
|                              | Man               | -0.32    | 0.03      | -9.48     | 0.00    | Man               |     |
| gender                       | Other/Undisclosed | 0.58     | 0.30      | 1.91      | 0.06    | Other/Undisclosed |     |
|                              | Yes               | 0.39     | 0.03      | 11.55     | 0.00    | Yes               |     |
| healthcare_experience        | Yes               | 0.39     | 0.03      | 11.55     | 0.00    | Yes               |     |
| cognitive_health             | Below average     | -0.41    | 0.06      | -6.76     | 0.00    | Below average     |     |
| mental_health                | Below average     | 0.03     | 0.05      | 0.62      | 0.53    | Below average     |     |
| illness_experience           | Yes               | -0.05    | 0.03      | -1.55     | 0.12    | Yes               |     |
| brain_disease_caregiver      | Yes               | 0.04     | 0.03      | 1.41      | 0.16    | Yes               |     |
| brain_research_participation | Yes               | -0.07    | 0.03      | -2.32     | 0.02    | Yes               |     |
| relationship                 | Stable            | -0.03    | 0.03      | -0.86     | 0.39    | Stable            |     |

## 1.4.8 Question 1: bin\_vs\_cont - Sleeping habits

| fct                          | term              | log_odds | std.error | statistic | p.value | cont_term         | con |
|------------------------------|-------------------|----------|-----------|-----------|---------|-------------------|-----|
| age                          | 41-60             | 0.72     | 0.04      | 18.89     | 0.00    | 41-60             |     |
|                              | <= 40             | 1.02     | 0.06      | 17.61     | 0.00    | <= 40             |     |
| education                    | Lower             | -0.18    | 0.04      | -5.11     | 0.00    | Lower             |     |
|                              | Man               | -0.39    | 0.04      | -10.87    | 0.00    | Man               |     |
| gender                       | Other/Undisclosed | 0.08     | 0.27      | 0.29      | 0.78    | Other/Undisclosed |     |
|                              | Yes               | 0.30     | 0.04      | 8.36      | 0.00    | Yes               |     |
| healthcare_experience        | Yes               | 0.30     | 0.04      | 8.36      | 0.00    | Yes               |     |
| mental_health                | Below average     | 0.29     | 0.05      | 5.28      | 0.00    | Below average     |     |
| illness_experience           | Yes               | 0.12     | 0.03      | 3.39      | 0.00    | Yes               |     |
| brain_disease_caregiver      | Yes               | -0.06    | 0.03      | -1.68     | 0.09    | Yes               |     |
| brain_research_participation | Yes               | -0.34    | 0.03      | -10.04    | 0.00    | Yes               |     |
| relationship                 | Stable            | -0.21    | 0.03      | -6.01     | 0.00    | Stable            |     |

## 1.4.9 Question 1: bin\_vs\_cont - Physical health

| fct                          | term              | log_odds | std.error | statistic | p.value | cont_term         | con |
|------------------------------|-------------------|----------|-----------|-----------|---------|-------------------|-----|
| age                          | 41-60             | 0.13     | 0.04      | 3.28      | 0.00    | 41-60             |     |
|                              | <= 40             | 0.16     | 0.05      | 2.97      | 0.00    | <= 40             |     |
| education                    | Lower             | -0.31    | 0.04      | -8.30     | 0.00    | Lower             |     |
| gender                       | Man               | -0.26    | 0.04      | -6.75     | 0.00    | Man               |     |
|                              | Other/Undisclosed | -0.29    | 0.25      | -1.14     | 0.25    | Other/Undisclosed |     |
| healthcare_experience        | Yes               | 0.43     | 0.04      | 10.86     | 0.00    | Yes               |     |
| cognitive_health             | Below average     | -0.58    | 0.06      | -8.95     | 0.00    | Below average     |     |
| mental_health                | Below average     | -0.29    | 0.05      | -5.84     | 0.00    | Below average     |     |
| illness_experience           | Yes               | -0.19    | 0.04      | -5.27     | 0.00    | Yes               |     |
| brain_disease_caregiver      | Yes               | 0.10     | 0.04      | 2.75      | 0.01    | Yes               |     |
| brain_research_participation | Yes               | 0.05     | 0.04      | 1.46      | 0.14    | Yes               |     |
| relationship                 | Stable            | 0.07     | 0.04      | 1.84      | 0.07    | Stable            |     |

## 1.4.10 Question 1: bin\_vs\_cont - Genetics

| fct                          | term              | log_odds | std.error | statistic | p.value | cont_term         | con |
|------------------------------|-------------------|----------|-----------|-----------|---------|-------------------|-----|
|                              | 41-60             | 0.01     | 0.04      | 0.27      | 0.79    | 41-60             |     |
| age                          | <= 40             | -0.43    | 0.04      | -10.19    | 0.00    | <= 40             |     |
| education                    | Lower             | -0.06    | 0.03      | -1.67     | 0.09    | Lower             |     |
|                              | Man               | -0.23    | 0.03      | -6.74     | 0.00    | Man               |     |
| gender                       | Other/Undisclosed | -0.77    | 0.20      | -3.97     | 0.00    | Other/Undisclosed |     |
| healthcare_experience        | Yes               | 0.12     | 0.03      | 3.52      | 0.00    | Yes               |     |
| cognitive_health             | Below average     | -0.19    | 0.06      | -2.94     | 0.00    | Below average     |     |
| mental_health                | Below average     | 0.01     | 0.05      | 0.27      | 0.79    | Below average     |     |
| illness_experience           | Yes               | 0.06     | 0.03      | 1.74      | 0.08    | Yes               |     |
| brain_disease_caregiver      | Yes               | 0.39     | 0.03      | 12.18     | 0.00    | Yes               |     |
| brain_research_participation | Yes               | 0.22     | 0.03      | 6.69      | 0.00    | Yes               |     |
| relationship                 | Stable            | 0.18     | 0.03      | 5.83      | 0.00    | Stable            |     |

## 1.4.11 Question 1: bin\_vs\_cont - Substance use

| fct                     | term              | log_odds | std.error | statistic | p.value | cont_term         | cont_beta |
|-------------------------|-------------------|----------|-----------|-----------|---------|-------------------|-----------|
| age                     | 41-60             | 0.53     | 0.05      | 10.25     | 0.00    | 41-60             | -0.1      |
|                         | <= 40             | 0.36     | 0.07      | 5.35      | 0.00    | <= 40             | -0.1      |
| education               | Lower             | -0.28    | 0.05      | -6.03     | 0.00    | Lower             | 0.0       |
|                         | Man               | -0.42    | 0.05      | -8.88     | 0.00    | Man               | 0.1       |
| gender                  | Other/Undisclosed | -0.83    | 0.26      | -3.24     | 0.00    | Other/Undisclosed | 0.1       |
|                         | Yes               | 0.41     | 0.05      | 8.25      | 0.00    | Yes               | -0.1      |
| healthcare_experience   | Yes               | 0.41     | 0.05      | 8.25      | 0.00    | Yes               | -0.1      |
| cognitive_health        | Below average     | -0.63    | 0.08      | -8.13     | 0.00    | Below average     | 0.1       |
| mental_health           | Below average     | -0.13    | 0.06      | -1.95     | 0.05    | Below average     | 0.0       |
| illness_experience      | Yes               | -0.21    | 0.05      | -4.59     | 0.00    | Yes               | 0.0       |
| brain_disease_caregiver | Yes               | 0.12     | 0.05      | 2.66      | 0.01    | Yes               | -0.0      |
| relationship            | Stable            | 0.08     | 0.05      | 1.78      | 0.08    | Stable            | -0.0      |

[[1]] [[1]][[1]] NULL

[[1]][[2]] NULL

[[1]][[3]] NULL

[[1]][[4]] NULL

[[1]][[5]] NULL

[[1]][[6]] NULL

[[1]][[7]] NULL

[[1]][[8]] NULL

[[1]][[9]] NULL

[[1]][[10]] NULL

[[1]][[11]] NULL

[[2]] [[2]][[1]] NULL

[[2]][[2]] NULL

[[2]][[3]] NULL

[[2]][[4]] NULL

[[2]][[5]] NULL

[[2]][[6]] NULL

[[2]][[7]] NULL

[[2]][[8]] NULL

[[2]][[9]] NULL

[[2]][[10]] NULL

[[2]][[11]] NULL

1  
2  
3 [[3]] [[3]][[1]] NULL  
4 [[3]][[2]] NULL  
5 [[3]][[3]] NULL  
6 [[3]][[4]] NULL  
7 [[3]][[5]] NULL  
8 [[3]][[6]] NULL  
9 [[3]][[7]] NULL  
10 [[3]][[8]] NULL  
11 [[3]][[9]] NULL  
12 [[3]][[10]] NULL  
13 [[3]][[11]] NULL  
14 [[4]] [[4]][[1]] NULL  
15 [[4]][[2]] NULL  
16 [[4]][[3]] NULL  
17 [[4]][[4]] NULL  
18 [[4]][[5]] NULL  
19 [[4]][[6]] NULL  
20 [[4]][[7]] NULL  
21 [[4]][[8]] NULL  
22 [[4]][[9]] NULL  
23 [[4]][[10]] NULL  
24 [[4]][[11]] NULL  
25  
26  
27  
28  
29  
30  
31  
32  
33  
34  
35  
36  
37  
38  
39  
40  
41  
42  
43  
44  
45  
46  
47  
48  
49  
50  
51  
52  
53  
54  
55  
56  
57  
58  
59  
60

For peer review only

1  
2  
3 **2 Question 2**  
4

5 **2.1 continuous**  
6  
7  
8  
9  
10  
11  
12  
13  
14  
15  
16  
17  
18  
19  
20  
21  
22  
23  
24  
25  
26  
27  
28  
29  
30  
31  
32  
33  
34  
35  
36  
37  
38  
39  
40  
41  
42  
43  
44  
45  
46  
47  
48  
49  
50  
51  
52  
53  
54  
55  
56  
57  
58  
59  
60

For peer review only



## 2.1.1 Question 2: continuous - In the womb

| fct                          | term              | estimate | std.error | statistic | p.value |
|------------------------------|-------------------|----------|-----------|-----------|---------|
|                              | (Intercept)       | 1.75     | 0.01      | 229.55    | 0.00    |
| age                          | 41-60             | -0.17    | 0.01      | -14.54    | 0.00    |
|                              | <= 40             | -0.18    | 0.01      | -12.24    | 0.00    |
| education                    | (Intercept)       | 1.59     | 0.01      | 255.60    | 0.00    |
|                              | Lower             | 0.22     | 0.01      | 19.76     | 0.00    |
| gender                       | (Intercept)       | 1.60     | 0.01      | 261.42    | 0.00    |
|                              | Man               | 0.22     | 0.01      | 18.76     | 0.00    |
|                              | Other/Undisclosed | -0.03    | 0.08      | -0.33     | 0.74    |
| healthcare_experience        | (Intercept)       | 1.75     | 0.01      | 266.42    | 0.00    |
|                              | Yes               | -0.24    | 0.01      | -22.48    | 0.00    |
| cognitive_health             | (Intercept)       | 1.65     | 0.01      | 307.82    | 0.00    |
|                              | Below average     | 0.20     | 0.02      | 9.35      | 0.00    |
| mental_health                | (Intercept)       | 1.66     | 0.01      | 297.07    | 0.00    |
|                              | Below average     | 0.02     | 0.02      | 1.30      | 0.19    |
| illness_experience           | (Intercept)       | 1.66     | 0.01      | 246.58    | 0.00    |
|                              | Yes               | 0.00     | 0.01      | 0.20      | 0.84    |
| brain_disease_caregiver      | (Intercept)       | 1.70     | 0.01      | 238.94    | 0.00    |
|                              | Yes               | -0.08    | 0.01      | -7.59     | 0.00    |
| brain_research_participation | (Intercept)       | 1.66     | 0.01      | 240.93    | 0.00    |
|                              | Yes               | 0.00     | 0.01      | -0.42     | 0.67    |
| relationship                 | (Intercept)       | 1.67     | 0.01      | 213.16    | 0.00    |
|                              | Stable            | -0.01    | 0.01      | -1.40     | 0.16    |

## 2.1.2 Question 2: continuous - Childhood

| fct                          | term              | estimate | std.error | statistic | p.value |
|------------------------------|-------------------|----------|-----------|-----------|---------|
|                              | (Intercept)       | 1.41     | 0.01      | 270.16    | 0.00    |
| age                          | 41-60             | -0.12    | 0.01      | -15.09    | 0.00    |
|                              | <= 40             | -0.18    | 0.01      | -17.75    | 0.00    |
| education                    | (Intercept)       | 1.30     | 0.00      | 303.30    | 0.00    |
|                              | Lower             | 0.11     | 0.01      | 14.84     | 0.00    |
| gender                       | (Intercept)       | 1.31     | 0.00      | 310.74    | 0.00    |
|                              | Man               | 0.09     | 0.01      | 11.39     | 0.00    |
|                              | Other/Undisclosed | -0.04    | 0.05      | -0.80     | 0.42    |
| healthcare_experience        | (Intercept)       | 1.38     | 0.00      | 304.28    | 0.00    |
|                              | Yes               | -0.11    | 0.01      | -15.41    | 0.00    |
| cognitive_health             | (Intercept)       | 1.33     | 0.00      | 361.51    | 0.00    |
|                              | Below average     | 0.12     | 0.02      | 7.83      | 0.00    |
| mental_health                | (Intercept)       | 1.34     | 0.00      | 349.73    | 0.00    |
|                              | Below average     | -0.02    | 0.01      | -2.17     | 0.03    |
| illness_experience           | (Intercept)       | 1.34     | 0.00      | 288.97    | 0.00    |
|                              | Yes               | 0.00     | 0.01      | 0.36      | 0.72    |
| brain_disease_caregiver      | (Intercept)       | 1.34     | 0.00      | 273.60    | 0.00    |
|                              | Yes               | 0.00     | 0.01      | 0.41      | 0.68    |
| brain_research_participation | (Intercept)       | 1.33     | 0.00      | 280.49    | 0.00    |
|                              | Yes               | 0.02     | 0.01      | 2.64      | 0.01    |
| relationship                 | (Intercept)       | 1.33     | 0.01      | 246.94    | 0.00    |
|                              | Stable            | 0.02     | 0.01      | 2.31      | 0.02    |

## 2.1.3 Question 2: continuous - Adolescence

| fct                          | term              | estimate | std.error | statistic | p.value |
|------------------------------|-------------------|----------|-----------|-----------|---------|
|                              | (Intercept)       | 1.40     | 0.00      | 287.36    | 0.00    |
| age                          | 41-60             | -0.10    | 0.01      | -13.91    | 0.00    |
|                              | <= 40             | -0.16    | 0.01      | -16.49    | 0.00    |
| education                    | (Intercept)       | 1.32     | 0.00      | 328.12    | 0.00    |
|                              | Lower             | 0.06     | 0.01      | 9.00      | 0.00    |
| gender                       | (Intercept)       | 1.31     | 0.00      | 333.19    | 0.00    |
|                              | Man               | 0.09     | 0.01      | 12.11     | 0.00    |
|                              | Other/Undisclosed | -0.05    | 0.05      | -0.94     | 0.35    |
| healthcare_experience        | (Intercept)       | 1.37     | 0.00      | 323.83    | 0.00    |
|                              | Yes               | -0.09    | 0.01      | -13.28    | 0.00    |
| cognitive_health             | (Intercept)       | 1.33     | 0.00      | 387.89    | 0.00    |
|                              | Below average     | 0.09     | 0.01      | 6.42      | 0.00    |
| mental_health                | (Intercept)       | 1.34     | 0.00      | 374.89    | 0.00    |
|                              | Below average     | -0.02    | 0.01      | -2.32     | 0.02    |
| illness_experience           | (Intercept)       | 1.34     | 0.00      | 310.78    | 0.00    |
|                              | Yes               | -0.01    | 0.01      | -1.19     | 0.24    |
| brain_disease_caregiver      | (Intercept)       | 1.34     | 0.00      | 294.08    | 0.00    |
|                              | Yes               | 0.00     | 0.01      | -0.66     | 0.51    |
| brain_research_participation | (Intercept)       | 1.34     | 0.00      | 302.59    | 0.00    |
|                              | Yes               | 0.00     | 0.01      | -0.09     | 0.93    |
| relationship                 | (Intercept)       | 1.32     | 0.01      | 263.81    | 0.00    |
|                              | Stable            | 0.03     | 0.01      | 3.75      | 0.00    |

## 2.1.4 Question 2: continuous - Young adulthood

| fct                          | term              | estimate | std.error | statistic | p.value |
|------------------------------|-------------------|----------|-----------|-----------|---------|
|                              | (Intercept)       | 1.49     | 0.01      | 285.79    | 0.00    |
| age                          | 41-60             | -0.07    | 0.01      | -9.61     | 0.00    |
|                              | <= 40             | -0.07    | 0.01      | -7.29     | 0.00    |
| education                    | (Intercept)       | 1.45     | 0.00      | 337.76    | 0.00    |
|                              | Lower             | 0.01     | 0.01      | 1.85      | 0.06    |
| gender                       | (Intercept)       | 1.42     | 0.00      | 337.97    | 0.00    |
|                              | Man               | 0.12     | 0.01      | 15.84     | 0.00    |
|                              | Other/Undisclosed | 0.05     | 0.05      | 1.03      | 0.30    |
| healthcare_experience        | (Intercept)       | 1.49     | 0.00      | 329.23    | 0.00    |
|                              | Yes               | -0.09    | 0.01      | -12.85    | 0.00    |
| cognitive_health             | (Intercept)       | 1.45     | 0.00      | 395.48    | 0.00    |
|                              | Below average     | 0.05     | 0.01      | 3.67      | 0.00    |
| mental_health                | (Intercept)       | 1.45     | 0.00      | 380.63    | 0.00    |
|                              | Below average     | 0.01     | 0.01      | 0.63      | 0.53    |
| illness_experience           | (Intercept)       | 1.47     | 0.00      | 318.65    | 0.00    |
|                              | Yes               | -0.03    | 0.01      | -4.43     | 0.00    |
| brain_disease_caregiver      | (Intercept)       | 1.48     | 0.00      | 304.26    | 0.00    |
|                              | Yes               | -0.05    | 0.01      | -7.39     | 0.00    |
| brain_research_participation | (Intercept)       | 1.46     | 0.00      | 309.76    | 0.00    |
|                              | Yes               | -0.02    | 0.01      | -2.78     | 0.01    |
| relationship                 | (Intercept)       | 1.45     | 0.01      | 270.97    | 0.00    |
|                              | Stable            | 0.00     | 0.01      | 0.67      | 0.51    |

## 2.1.5 Question 2: continuous - Middle age

| fct                          | term              | estimate | std.error | statistic | p.value |
|------------------------------|-------------------|----------|-----------|-----------|---------|
|                              | (Intercept)       | 1.44     | 0.01      | 282.09    | 0.00    |
| age                          | 41-60             | -0.10    | 0.01      | -12.88    | 0.00    |
|                              | <= 40             | 0.01     | 0.01      | 0.84      | 0.40    |
| education                    | (Intercept)       | 1.40     | 0.00      | 333.55    | 0.00    |
|                              | Lower             | 0.01     | 0.01      | 1.73      | 0.08    |
| gender                       | (Intercept)       | 1.35     | 0.00      | 332.02    | 0.00    |
|                              | Man               | 0.16     | 0.01      | 20.93     | 0.00    |
|                              | Other/Undisclosed | 0.17     | 0.05      | 3.23      | 0.00    |
| healthcare_experience        | (Intercept)       | 1.43     | 0.00      | 322.53    | 0.00    |
|                              | Yes               | -0.07    | 0.01      | -9.33     | 0.00    |
| cognitive_health             | (Intercept)       | 1.40     | 0.00      | 390.51    | 0.00    |
|                              | Below average     | 0.05     | 0.01      | 3.65      | 0.00    |
| mental_health                | (Intercept)       | 1.40     | 0.00      | 375.23    | 0.00    |
|                              | Below average     | 0.02     | 0.01      | 2.40      | 0.02    |
| illness_experience           | (Intercept)       | 1.41     | 0.00      | 313.33    | 0.00    |
|                              | Yes               | -0.02    | 0.01      | -2.48     | 0.01    |
| brain_disease_caregiver      | (Intercept)       | 1.44     | 0.00      | 304.92    | 0.00    |
|                              | Yes               | -0.09    | 0.01      | -13.03    | 0.00    |
| brain_research_participation | (Intercept)       | 1.41     | 0.00      | 306.87    | 0.00    |
|                              | Yes               | -0.03    | 0.01      | -4.17     | 0.00    |
| relationship                 | (Intercept)       | 1.41     | 0.01      | 269.94    | 0.00    |
|                              | Stable            | -0.02    | 0.01      | -2.54     | 0.01    |

### 2.1.6 Question 2: continuous - Old age

| fct                          | term              | estimate | std.error | statistic | p.value |
|------------------------------|-------------------|----------|-----------|-----------|---------|
|                              | (Intercept)       | 1.31     | 0.00      | 263.47    | 0.00    |
| age                          | 41-60             | -0.01    | 0.01      | -1.40     | 0.16    |
|                              | <= 40             | 0.09     | 0.01      | 9.28      | 0.00    |
| education                    | (Intercept)       | 1.30     | 0.00      | 320.45    | 0.00    |
|                              | Lower             | 0.04     | 0.01      | 5.44      | 0.00    |
| gender                       | (Intercept)       | 1.28     | 0.00      | 322.08    | 0.00    |
|                              | Man               | 0.12     | 0.01      | 16.04     | 0.00    |
|                              | Other/Undisclosed | 0.17     | 0.05      | 3.32      | 0.00    |
| healthcare_experience        | (Intercept)       | 1.33     | 0.00      | 309.41    | 0.00    |
|                              | Yes               | -0.04    | 0.01      | -5.57     | 0.00    |
| cognitive_health             | (Intercept)       | 1.31     | 0.00      | 377.50    | 0.00    |
|                              | Below average     | 0.05     | 0.01      | 3.63      | 0.00    |
| mental_health                | (Intercept)       | 1.31     | 0.00      | 362.16    | 0.00    |
|                              | Below average     | 0.04     | 0.01      | 4.24      | 0.00    |
| illness_experience           | (Intercept)       | 1.32     | 0.00      | 302.45    | 0.00    |
|                              | Yes               | -0.01    | 0.01      | -1.63     | 0.10    |
| brain_disease_caregiver      | (Intercept)       | 1.35     | 0.00      | 292.30    | 0.00    |
|                              | Yes               | -0.06    | 0.01      | -9.54     | 0.00    |
| brain_research_participation | (Intercept)       | 1.34     | 0.00      | 298.67    | 0.00    |
|                              | Yes               | -0.05    | 0.01      | -6.83     | 0.00    |
| relationship                 | (Intercept)       | 1.33     | 0.01      | 261.80    | 0.00    |
|                              | Stable            | -0.02    | 0.01      | -3.53     | 0.00    |

## 2.2 binary

## 2.2.1 Question 2: binary - In the womb

| fct                          | term              | estimate | std.error | statistic | p.value |
|------------------------------|-------------------|----------|-----------|-----------|---------|
|                              | (Intercept)       | 1.43     | 0.02      | 63.24     | 0.00    |
| age                          | 41-60             | 0.40     | 0.04      | 10.94     | 0.00    |
|                              | <= 40             | 0.39     | 0.05      | 8.04      | 0.00    |
| education                    | (Intercept)       | 1.82     | 0.02      | 86.26     | 0.00    |
|                              | Lower             | -0.52    | 0.03      | -15.42    | 0.00    |
| gender                       | (Intercept)       | 1.81     | 0.02      | 87.70     | 0.00    |
|                              | Man               | -0.54    | 0.03      | -15.83    | 0.00    |
|                              | Other/Undisclosed | 0.04     | 0.26      | 0.15      | 0.88    |
| healthcare_experience        | (Intercept)       | 1.42     | 0.02      | 72.64     | 0.00    |
|                              | Yes               | 0.65     | 0.04      | 17.78     | 0.00    |
| cognitive_health             | (Intercept)       | 1.67     | 0.02      | 97.64     | 0.00    |
|                              | Below average     | -0.51    | 0.06      | -8.47     | 0.00    |
| mental_health                | (Intercept)       | 1.65     | 0.02      | 93.42     | 0.00    |
|                              | Below average     | -0.14    | 0.05      | -3.00     | 0.00    |
| illness_experience           | (Intercept)       | 1.64     | 0.02      | 77.25     | 0.00    |
|                              | Yes               | -0.02    | 0.03      | -0.65     | 0.52    |
| brain_disease_caregiver      | (Intercept)       | 1.53     | 0.02      | 70.58     | 0.00    |
|                              | Yes               | 0.24     | 0.03      | 7.35      | 0.00    |
| brain_research_participation | (Intercept)       | 1.65     | 0.02      | 75.48     | 0.00    |
|                              | Yes               | -0.03    | 0.03      | -1.05     | 0.29    |
| relationship                 | (Intercept)       | 1.60     | 0.02      | 65.62     | 0.00    |
|                              | Stable            | 0.06     | 0.03      | 1.88      | 0.06    |

## 2.2.2 Question 2: binary - Childhood

| fct                          | term              | estimate | std.error | statistic | p.value |
|------------------------------|-------------------|----------|-----------|-----------|---------|
|                              | (Intercept)       | 2.65     | 0.04      | 73.93     | 0.00    |
| age                          | 41-60             | 0.57     | 0.06      | 9.17      | 0.00    |
|                              | <= 40             | 0.64     | 0.09      | 7.26      | 0.00    |
| education                    | (Intercept)       | 3.13     | 0.04      | 86.00     | 0.00    |
|                              | Lower             | -0.56    | 0.06      | -9.99     | 0.00    |
| gender                       | (Intercept)       | 3.10     | 0.04      | 87.94     | 0.00    |
|                              | Man               | -0.52    | 0.06      | -9.23     | 0.00    |
|                              | Other/Undisclosed | -0.12    | 0.42      | -0.28     | 0.78    |
| healthcare_experience        | (Intercept)       | 2.70     | 0.03      | 85.08     | 0.00    |
|                              | Yes               | 0.72     | 0.06      | 11.26     | 0.00    |
| cognitive_health             | (Intercept)       | 2.97     | 0.03      | 102.68    | 0.00    |
|                              | Below average     | -0.58    | 0.09      | -6.21     | 0.00    |
| mental_health                | (Intercept)       | 2.93     | 0.03      | 99.12     | 0.00    |
|                              | Below average     | -0.04    | 0.08      | -0.46     | 0.65    |
| illness_experience           | (Intercept)       | 2.96     | 0.04      | 81.90     | 0.00    |
|                              | Yes               | -0.08    | 0.06      | -1.48     | 0.14    |
| brain_disease_caregiver      | (Intercept)       | 2.92     | 0.04      | 77.91     | 0.00    |
|                              | Yes               | 0.02     | 0.06      | 0.29      | 0.77    |
| brain_research_participation | (Intercept)       | 2.96     | 0.04      | 79.93     | 0.00    |
|                              | Yes               | -0.07    | 0.06      | -1.31     | 0.19    |
| relationship                 | (Intercept)       | 2.98     | 0.04      | 70.24     | 0.00    |
|                              | Stable            | -0.10    | 0.06      | -1.76     | 0.08    |



## 2.2.3 Question 2: binary - Adolescence

| fct                          | term              | estimate | std.error | statistic | p.value |
|------------------------------|-------------------|----------|-----------|-----------|---------|
|                              | (Intercept)       | 3.06     | 0.04      | 71.14     | 0.00    |
| age                          | 41-60             | 0.54     | 0.07      | 7.18      | 0.00    |
|                              | <= 40             | 0.76     | 0.11      | 6.79      | 0.00    |
| education                    | (Intercept)       | 3.49     | 0.04      | 81.21     | 0.00    |
|                              | Lower             | -0.40    | 0.07      | -5.93     | 0.00    |
| gender                       | (Intercept)       | 3.47     | 0.04      | 82.93     | 0.00    |
|                              | Man               | -0.39    | 0.07      | -5.59     | 0.00    |
|                              | Other/Undisclosed | -0.29    | 0.46      | -0.64     | 0.52    |
| healthcare_experience        | (Intercept)       | 3.15     | 0.04      | 81.08     | 0.00    |
|                              | Yes               | 0.58     | 0.08      | 7.74      | 0.00    |
| cognitive_health             | (Intercept)       | 3.40     | 0.04      | 96.48     | 0.00    |
|                              | Below average     | -0.69    | 0.11      | -6.44     | 0.00    |
| mental_health                | (Intercept)       | 3.36     | 0.04      | 93.38     | 0.00    |
|                              | Below average     | -0.11    | 0.09      | -1.16     | 0.25    |
| illness_experience           | (Intercept)       | 3.35     | 0.04      | 77.56     | 0.00    |
|                              | Yes               | -0.01    | 0.07      | -0.12     | 0.91    |
| brain_disease_caregiver      | (Intercept)       | 3.34     | 0.05      | 73.49     | 0.00    |
|                              | Yes               | 0.00     | 0.07      | -0.02     | 0.98    |
| brain_research_participation | (Intercept)       | 3.36     | 0.04      | 75.48     | 0.00    |
|                              | Yes               | -0.05    | 0.07      | -0.68     | 0.50    |
| relationship                 | (Intercept)       | 3.42     | 0.05      | 65.86     | 0.00    |
|                              | Stable            | -0.13    | 0.07      | -1.96     | 0.05    |

## 2.2.4 Question 2: binary - Young adulthood

| fct                          | term              | estimate | std.error | statistic | p.value |
|------------------------------|-------------------|----------|-----------|-----------|---------|
|                              | (Intercept)       | 2.85     | 0.04      | 72.82     | 0.00    |
| age                          | 41-60             | 0.46     | 0.07      | 6.98      | 0.00    |
|                              | <= 40             | 0.19     | 0.08      | 2.35      | 0.02    |
| education                    | (Intercept)       | 3.02     | 0.03      | 87.28     | 0.00    |
|                              | Lower             | 0.05     | 0.06      | 0.86      | 0.39    |
| gender                       | (Intercept)       | 3.24     | 0.04      | 86.19     | 0.00    |
|                              | Man               | -0.58    | 0.06      | -9.85     | 0.00    |
|                              | Other/Undisclosed | -0.68    | 0.35      | -1.96     | 0.05    |
| healthcare_experience        | (Intercept)       | 2.88     | 0.03      | 83.82     | 0.00    |
|                              | Yes               | 0.47     | 0.06      | 7.38      | 0.00    |
| cognitive_health             | (Intercept)       | 3.07     | 0.03      | 101.50    | 0.00    |
|                              | Below average     | -0.42    | 0.10      | -4.08     | 0.00    |
| mental_health                | (Intercept)       | 3.06     | 0.03      | 97.59     | 0.00    |
|                              | Below average     | -0.19    | 0.08      | -2.36     | 0.02    |
| illness_experience           | (Intercept)       | 2.99     | 0.04      | 81.65     | 0.00    |
|                              | Yes               | 0.12     | 0.06      | 2.07      | 0.04    |
| brain_disease_caregiver      | (Intercept)       | 2.94     | 0.04      | 77.70     | 0.00    |
|                              | Yes               | 0.21     | 0.06      | 3.63      | 0.00    |
| brain_research_participation | (Intercept)       | 3.06     | 0.04      | 78.97     | 0.00    |
|                              | Yes               | -0.04    | 0.06      | -0.77     | 0.44    |
| relationship                 | (Intercept)       | 3.00     | 0.04      | 70.12     | 0.00    |
|                              | Stable            | 0.07     | 0.06      | 1.19      | 0.23    |

## 2.2.5 Question 2: binary - Middle age

| fct                          | term              | estimate | std.error | statistic | p.value |
|------------------------------|-------------------|----------|-----------|-----------|---------|
|                              | (Intercept)       | 3.01     | 0.04      | 71.66     | 0.00    |
| age                          | 41-60             | 0.52     | 0.07      | 7.17      | 0.00    |
|                              | <= 40             | -0.20    | 0.08      | -2.57     | 0.01    |
| education                    | (Intercept)       | 3.16     | 0.04      | 85.70     | 0.00    |
|                              | Lower             | -0.08    | 0.06      | -1.20     | 0.23    |
| gender                       | (Intercept)       | 3.48     | 0.04      | 82.85     | 0.00    |
|                              | Man               | -0.89    | 0.06      | -14.53    | 0.00    |
|                              | Other/Undisclosed | -1.41    | 0.29      | -4.91     | 0.00    |
| healthcare_experience        | (Intercept)       | 2.99     | 0.04      | 82.84     | 0.00    |
|                              | Yes               | 0.43     | 0.07      | 6.47      | 0.00    |
| cognitive_health             | (Intercept)       | 3.17     | 0.03      | 100.16    | 0.00    |
|                              | Below average     | -0.43    | 0.11      | -3.98     | 0.00    |
| mental_health                | (Intercept)       | 3.19     | 0.03      | 95.93     | 0.00    |
|                              | Below average     | -0.36    | 0.08      | -4.49     | 0.00    |
| illness_experience           | (Intercept)       | 3.09     | 0.04      | 80.68     | 0.00    |
|                              | Yes               | 0.13     | 0.06      | 2.02      | 0.04    |
| brain_disease_caregiver      | (Intercept)       | 2.96     | 0.04      | 77.62     | 0.00    |
|                              | Yes               | 0.43     | 0.06      | 6.89      | 0.00    |
| brain_research_participation | (Intercept)       | 3.12     | 0.04      | 78.37     | 0.00    |
|                              | Yes               | 0.04     | 0.06      | 0.73      | 0.46    |
| relationship                 | (Intercept)       | 3.08     | 0.04      | 69.46     | 0.00    |
|                              | Stable            | 0.11     | 0.06      | 1.79      | 0.07    |

### 2.2.6 Question 2: binary - Old age

| fct                          | term              | estimate | std.error | statistic | p.value |
|------------------------------|-------------------|----------|-----------|-----------|---------|
|                              | (Intercept)       | 3.23     | 0.05      | 69.57     | 0.00    |
| age                          | 41-60             | 0.17     | 0.07      | 2.35      | 0.02    |
|                              | <= 40             | -0.60    | 0.08      | -7.93     | 0.00    |
| education                    | (Intercept)       | 3.24     | 0.04      | 84.73     | 0.00    |
|                              | Lower             | -0.23    | 0.06      | -3.60     | 0.00    |
| gender                       | (Intercept)       | 3.50     | 0.04      | 82.59     | 0.00    |
|                              | Man               | -0.88    | 0.06      | -14.25    | 0.00    |
|                              | Other/Undisclosed | -1.05    | 0.33      | -3.17     | 0.00    |
| healthcare_experience        | (Intercept)       | 3.04     | 0.04      | 82.38     | 0.00    |
|                              | Yes               | 0.35     | 0.07      | 5.26      | 0.00    |
| cognitive_health             | (Intercept)       | 3.19     | 0.03      | 99.83     | 0.00    |
|                              | Below average     | -0.42    | 0.11      | -3.87     | 0.00    |
| mental_health                | (Intercept)       | 3.23     | 0.03      | 95.43     | 0.00    |
|                              | Below average     | -0.43    | 0.08      | -5.41     | 0.00    |
| illness_experience           | (Intercept)       | 3.12     | 0.04      | 80.34     | 0.00    |
|                              | Yes               | 0.10     | 0.06      | 1.59      | 0.11    |
| brain_disease_caregiver      | (Intercept)       | 3.02     | 0.04      | 77.11     | 0.00    |
|                              | Yes               | 0.34     | 0.06      | 5.48      | 0.00    |
| brain_research_participation | (Intercept)       | 3.09     | 0.04      | 78.74     | 0.00    |
|                              | Yes               | 0.19     | 0.06      | 2.97      | 0.00    |
| relationship                 | (Intercept)       | 3.06     | 0.04      | 69.64     | 0.00    |
|                              | Stable            | 0.19     | 0.06      | 3.09      | 0.00    |

### 2.3 ordinal

1  
2  
3  
4  
5  
6  
7  
8  
9  
10  
11  
12  
13  
14  
15  
16  
17  
18  
19  
20  
21  
22  
23  
24  
25  
26  
27  
28  
29  
30  
31  
32  
33  
34  
35  
36  
37  
38  
39  
40  
41  
42  
43  
44  
45  
46  
47  
48  
49  
50  
51  
52  
53  
54  
55  
56  
57  
58  
59  
60

For peer review only

## 2.3.1 Question 2: ordinal - In the womb

| fct                          | term                               | estimate | std.error | statistic | coef.type   |
|------------------------------|------------------------------------|----------|-----------|-----------|-------------|
| age                          | 41-60                              | -0.36    | 0.03      | -14.07    | coefficient |
|                              | <= 40                              | -0.41    | 0.03      | -11.92    | coefficient |
|                              | Very important Important           | -0.01    | 0.02      | -0.53     | scale       |
|                              | Important Moderately important     | 1.44     | 0.02      | 71.71     | scale       |
|                              | Moderately important Not important | 2.82     | 0.03      | 91.71     | scale       |
| education                    | Lower                              | 0.47     | 0.02      | 19.05     | coefficient |
|                              | Very important Important           | 0.34     | 0.01      | 23.35     | scale       |
|                              | Important Moderately important     | 1.80     | 0.02      | 95.88     | scale       |
|                              | Moderately important Not important | 3.18     | 0.03      | 105.37    | scale       |
| gender                       | Man                                | 0.45     | 0.03      | 17.48     | coefficient |
|                              | Other/Undisclosed                  | -0.04    | 0.18      | -0.22     | coefficient |
|                              | Very important Important           | 0.32     | 0.01      | 22.24     | scale       |
|                              | Important Moderately important     | 1.77     | 0.02      | 96.10     | scale       |
|                              | Moderately important Not important | 3.15     | 0.03      | 105.21    | scale       |
| healthcare_experience        | Yes                                | -0.53    | 0.02      | -21.60    | coefficient |
|                              | Very important Important           | -0.01    | 0.02      | -0.67     | scale       |
|                              | Important Moderately important     | 1.45     | 0.02      | 79.21     | scale       |
|                              | Moderately important Not important | 2.83     | 0.03      | 95.62     | scale       |
| cognitive_health             | Below average                      | 0.39     | 0.05      | 8.04      | coefficient |
|                              | Very important Important           | 0.22     | 0.01      | 17.21     | scale       |
|                              | Important Moderately important     | 1.66     | 0.02      | 99.22     | scale       |
|                              | Moderately important Not important | 3.03     | 0.03      | 105.29    | scale       |
| mental_health                | Below average                      | 0.01     | 0.03      | 0.22      | coefficient |
|                              | Very important Important           | 0.19     | 0.01      | 14.94     | scale       |
|                              | Important Moderately important     | 1.64     | 0.02      | 96.26     | scale       |
|                              | Moderately important Not important | 3.01     | 0.03      | 103.92    | scale       |
| illness_experience           | Yes                                | -0.02    | 0.02      | -0.86     | coefficient |
|                              | Very important Important           | 0.18     | 0.02      | 11.94     | scale       |
|                              | Important Moderately important     | 1.63     | 0.02      | 86.00     | scale       |
|                              | Moderately important Not important | 3.00     | 0.03      | 99.60     | scale       |
| brain_disease_caregiver      | Yes                                | -0.17    | 0.02      | -7.15     | coefficient |
|                              | Very important Important           | 0.11     | 0.02      | 7.04      | scale       |
|                              | Important Moderately important     | 1.56     | 0.02      | 80.16     | scale       |
|                              | Moderately important Not important | 2.93     | 0.03      | 96.54     | scale       |
| brain_research_participation | Yes                                | -0.02    | 0.02      | -0.83     | coefficient |
|                              | Very important Important           | 0.18     | 0.02      | 11.65     | scale       |
|                              | Important Moderately important     | 1.63     | 0.02      | 84.53     | scale       |
|                              | Moderately important Not important | 3.00     | 0.03      | 98.91     | scale       |
| relationship                 | Yes                                | -0.01    | 0.02      | -1.75     | coefficient |
|                              | Very important Important           | 0.17     | 0.02      | 9.50      | scale       |
|                              | Important Moderately important     | 1.61     | 0.02      | 77.14     | scale       |

1  
2  
3  
4  
5  
6  
7  
8  
9  
10  
11  
12  
13  
14  
15  
16  
17  
18  
19  
20  
21  
22  
23  
24  
25  
26  
27  
28  
29  
30  
31  
32  
33  
34  
35  
36  
37  
38  
39  
40  
41  
42  
43  
44  
45  
46  
47  
48  
49  
50  
51  
52  
53  
54  
55  
56  
57  
58  
59  
60

For peer review only

## 2.3.2 Question 2: ordinal - Childhood

| fct                          | term                               | estimate | std.error | statistic | coef.type   |
|------------------------------|------------------------------------|----------|-----------|-----------|-------------|
| age                          | 41-60                              | -0.42    | 0.03      | -14.34    | coefficient |
|                              | <= 40                              | -0.75    | 0.04      | -17.90    | coefficient |
|                              | Very important Important           | 0.67     | 0.02      | 35.65     | scale       |
|                              | Important Moderately important     | 2.68     | 0.03      | 89.23     | scale       |
|                              | Moderately important Not important | 4.83     | 0.08      | 62.19     | scale       |
| education                    | Lower                              | 0.40     | 0.03      | 14.12     | coefficient |
|                              | Very important Important           | 1.06     | 0.02      | 63.85     | scale       |
|                              | Important Moderately important     | 3.07     | 0.03      | 104.07    | scale       |
|                              | Moderately important Not important | 5.21     | 0.08      | 67.28     | scale       |
| gender                       | Man                                | 0.30     | 0.03      | 10.27     | coefficient |
|                              | Other/Undisclosed                  | -0.26    | 0.22      | -1.18     | coefficient |
|                              | Very important Important           | 1.02     | 0.02      | 62.99     | scale       |
|                              | Important Moderately important     | 3.02     | 0.03      | 103.70    | scale       |
|                              | Moderately important Not important | 5.16     | 0.08      | 66.77     | scale       |
| healthcare_experience        | Yes                                | -0.40    | 0.03      | -14.30    | coefficient |
|                              | Very important Important           | 0.78     | 0.02      | 47.14     | scale       |
|                              | Important Moderately important     | 2.79     | 0.03      | 96.22     | scale       |
|                              | Moderately important Not important | 4.93     | 0.08      | 63.88     | scale       |
| cognitive_health             | Below average                      | 0.34     | 0.05      | 6.48      | coefficient |
|                              | Very important Important           | 0.95     | 0.01      | 68.57     | scale       |
|                              | Important Moderately important     | 2.95     | 0.03      | 106.19    | scale       |
|                              | Moderately important Not important | 5.09     | 0.08      | 66.32     | scale       |
| mental_health                | Below average                      | -0.13    | 0.04      | -3.18     | coefficient |
|                              | Very important Important           | 0.91     | 0.01      | 63.83     | scale       |
|                              | Important Moderately important     | 2.91     | 0.03      | 104.24    | scale       |
|                              | Moderately important Not important | 5.05     | 0.08      | 65.76     | scale       |
| illness_experience           | Yes                                | -0.01    | 0.03      | -0.38     | coefficient |
|                              | Very important Important           | 0.93     | 0.02      | 53.62     | scale       |
|                              | Important Moderately important     | 2.92     | 0.03      | 98.86     | scale       |
|                              | Moderately important Not important | 5.07     | 0.08      | 65.39     | scale       |
| brain_disease_caregiver      | Yes                                | 0.02     | 0.03      | 0.88      | coefficient |
|                              | Very important Important           | 0.94     | 0.02      | 51.38     | scale       |
|                              | Important Moderately important     | 2.94     | 0.03      | 97.21     | scale       |
|                              | Moderately important Not important | 5.08     | 0.08      | 65.38     | scale       |
| brain_research_participation | Yes                                | 0.08     | 0.03      | 2.96      | coefficient |
|                              | Very important Important           | 0.96     | 0.02      | 53.99     | scale       |
|                              | Important Moderately important     | 2.96     | 0.03      | 98.75     | scale       |
|                              | Moderately important Not important | 5.11     | 0.08      | 65.76     | scale       |
| relationship                 | Below average                      | 0.05     | 0.03      | 2.03      | coefficient |
|                              | Very important Important           | 0.96     | 0.02      | 47.50     | scale       |
|                              | Important Moderately important     | 2.96     | 0.03      | 94.07     | scale       |



1  
2  
3  
4  
5  
6  
7  
8  
9  
10  
11  
12  
13  
14  
15  
16  
17  
18  
19  
20  
21  
22  
23  
24  
25  
26  
27  
28  
29  
30  
31  
32  
33  
34  
35  
36  
37  
38  
39  
40  
41  
42  
43  
44  
45  
46  
47  
48  
49  
50  
51  
52  
53  
54  
55  
56  
57  
58  
59  
60

For peer review only

## 2.3.3 Question 2: ordinal - Adolescence

| fct                          | term                               | estimate | std.error | statistic | coef.type   |
|------------------------------|------------------------------------|----------|-----------|-----------|-------------|
| age                          | 41-60                              | -0.38    | 0.03      | -13.32    | coefficient |
|                              | <= 40                              | -0.66    | 0.04      | -16.26    | coefficient |
|                              | Very important Important           | 0.62     | 0.02      | 33.11     | scale       |
|                              | Important Moderately important     | 3.12     | 0.04      | 88.13     | scale       |
|                              | Moderately important Not important | 5.56     | 0.11      | 50.61     | scale       |
| education                    | Lower                              | 0.23     | 0.03      | 8.34      | coefficient |
|                              | Very important Important           | 0.93     | 0.02      | 57.62     | scale       |
|                              | Important Moderately important     | 3.42     | 0.03      | 98.66     | scale       |
|                              | Moderately important Not important | 5.86     | 0.11      | 53.44     | scale       |
| gender                       | Man                                | 0.34     | 0.03      | 12.01     | coefficient |
|                              | Other/Undisclosed                  | -0.31    | 0.22      | -1.43     | coefficient |
|                              | Very important Important           | 0.95     | 0.02      | 59.87     | scale       |
|                              | Important Moderately important     | 3.45     | 0.03      | 99.56     | scale       |
|                              | Moderately important Not important | 5.89     | 0.11      | 53.71     | scale       |
| healthcare_experience        | Yes                                | -0.35    | 0.03      | -12.77    | coefficient |
|                              | Very important Important           | 0.72     | 0.02      | 44.12     | scale       |
|                              | Important Moderately important     | 3.22     | 0.03      | 93.38     | scale       |
|                              | Moderately important Not important | 5.66     | 0.11      | 51.65     | scale       |
| cognitive_health             | Below average                      | 0.27     | 0.05      | 4.99      | coefficient |
|                              | Very important Important           | 0.87     | 0.01      | 63.84     | scale       |
|                              | Important Moderately important     | 3.36     | 0.03      | 100.36    | scale       |
|                              | Moderately important Not important | 5.80     | 0.11      | 53.07     | scale       |
| mental_health                | Below average                      | -0.12    | 0.04      | -3.07     | coefficient |
|                              | Very important Important           | 0.84     | 0.01      | 59.49     | scale       |
|                              | Important Moderately important     | 3.33     | 0.03      | 99.00     | scale       |
|                              | Moderately important Not important | 5.77     | 0.11      | 52.75     | scale       |
| illness_experience           | Yes                                | -0.04    | 0.03      | -1.55     | coefficient |
|                              | Very important Important           | 0.84     | 0.02      | 49.34     | scale       |
|                              | Important Moderately important     | 3.33     | 0.03      | 95.27     | scale       |
|                              | Moderately important Not important | 5.77     | 0.11      | 52.54     | scale       |
| brain_disease_caregiver      | Yes                                | -0.02    | 0.03      | -0.64     | coefficient |
|                              | Very important Important           | 0.85     | 0.02      | 47.15     | scale       |
|                              | Important Moderately important     | 3.34     | 0.04      | 94.16     | scale       |
|                              | Moderately important Not important | 5.78     | 0.11      | 52.54     | scale       |
| brain_research_participation | Yes                                | -0.01    | 0.03      | -0.30     | coefficient |
|                              | Very important Important           | 0.85     | 0.02      | 48.79     | scale       |
|                              | Important Moderately important     | 3.34     | 0.04      | 94.96     | scale       |
|                              | Moderately important Not important | 5.78     | 0.11      | 52.62     | scale       |
| relationship                 | Below average                      | 0.10     | 0.03      | 3.76      | coefficient |
|                              | Very important Important           | 0.91     | 0.02      | 45.45     | scale       |
|                              | Important Moderately important     | 3.40     | 0.04      | 92.85     | scale       |

1  
2  
3  
4  
5  
6  
7  
8  
9  
10  
11  
12  
13  
14  
15  
16  
17  
18  
19  
20  
21  
22  
23  
24  
25  
26  
27  
28  
29  
30  
31  
32  
33  
34  
35  
36  
37  
38  
39  
40  
41  
42  
43  
44  
45  
46  
47  
48  
49  
50  
51  
52  
53  
54  
55  
56  
57  
58  
59  
60

For peer review only

## 2.3.4 Question 2: ordinal - Young adulthood

| fct                          | term                               | estimate | std.error | statistic | coef.type   |
|------------------------------|------------------------------------|----------|-----------|-----------|-------------|
| age                          | 41-60                              | -0.24    | 0.03      | -8.95     | coefficient |
|                              | <= 40                              | -0.26    | 0.04      | -7.34     | coefficient |
|                              | Very important Important           | 0.25     | 0.02      | 14.00     | scale       |
|                              | Important Moderately important     | 2.91     | 0.03      | 92.85     | scale       |
|                              | Moderately important Not important | 6.22     | 0.14      | 42.91     | scale       |
| education                    | Lower                              | 0.05     | 0.03      | 2.10      | coefficient |
|                              | Very important Important           | 0.40     | 0.01      | 26.85     | scale       |
|                              | Important Moderately important     | 3.05     | 0.03      | 101.48    | scale       |
|                              | Moderately important Not important | 6.36     | 0.14      | 43.97     | scale       |
| gender                       | Man                                | 0.41     | 0.03      | 15.28     | coefficient |
|                              | Other/Undisclosed                  | 0.11     | 0.18      | 0.59      | coefficient |
|                              | Very important Important           | 0.50     | 0.01      | 33.92     | scale       |
|                              | Important Moderately important     | 3.17     | 0.03      | 104.40    | scale       |
|                              | Moderately important Not important | 6.48     | 0.14      | 44.75     | scale       |
| healthcare_experience        | Yes                                | -0.32    | 0.03      | -12.52    | coefficient |
|                              | Very important Important           | 0.26     | 0.02      | 16.82     | scale       |
|                              | Important Moderately important     | 2.92     | 0.03      | 97.06     | scale       |
|                              | Moderately important Not important | 6.24     | 0.14      | 43.08     | scale       |
| cognitive_health             | Below average                      | 0.15     | 0.05      | 3.02      | coefficient |
|                              | Very important Important           | 0.39     | 0.01      | 30.73     | scale       |
|                              | Important Moderately important     | 3.05     | 0.03      | 104.72    | scale       |
|                              | Moderately important Not important | 6.36     | 0.14      | 43.98     | scale       |
| mental_health                | Below average                      | 0.01     | 0.04      | 0.21      | coefficient |
|                              | Very important Important           | 0.38     | 0.01      | 28.96     | scale       |
|                              | Important Moderately important     | 3.04     | 0.03      | 103.73    | scale       |
|                              | Moderately important Not important | 6.35     | 0.14      | 43.91     | scale       |
| illness_experience           | Yes                                | -0.11    | 0.02      | -4.58     | coefficient |
|                              | Very important Important           | 0.34     | 0.02      | 21.24     | scale       |
|                              | Important Moderately important     | 2.99     | 0.03      | 98.32     | scale       |
|                              | Moderately important Not important | 6.30     | 0.14      | 43.52     | scale       |
| brain_disease_caregiver      | Yes                                | -0.18    | 0.02      | -7.39     | coefficient |
|                              | Very important Important           | 0.30     | 0.02      | 17.92     | scale       |
|                              | Important Moderately important     | 2.96     | 0.03      | 96.03     | scale       |
|                              | Moderately important Not important | 6.27     | 0.14      | 43.25     | scale       |
| brain_research_participation | Yes                                | -0.08    | 0.02      | -3.25     | coefficient |
|                              | Very important Important           | 0.35     | 0.02      | 21.43     | scale       |
|                              | Important Moderately important     | 3.00     | 0.03      | 97.93     | scale       |
|                              | Moderately important Not important | 6.31     | 0.14      | 43.57     | scale       |
| relationship                 | Stable                             | 0.03     | 0.02      | 1.06      | coefficient |
|                              | Very important Important           | 0.40     | 0.02      | 21.44     | scale       |
|                              | Important Moderately important     | 3.05     | 0.03      | 95.27     | scale       |

1  
2  
3  
4  
5  
6  
7  
8  
9  
10  
11  
12  
13  
14  
15  
16  
17  
18  
19  
20  
21  
22  
23  
24  
25  
26  
27  
28  
29  
30  
31  
32  
33  
34  
35  
36  
37  
38  
39  
40  
41  
42  
43  
44  
45  
46  
47  
48  
49  
50  
51  
52  
53  
54  
55  
56  
57  
58  
59  
60

For peer review only

## 2.3.5 Question 2: ordinal - Middle age

| fct                          | term                               | estimate | std.error | statistic | coef.type   |
|------------------------------|------------------------------------|----------|-----------|-----------|-------------|
| age                          | 41-60                              | -0.35    | 0.03      | -12.69    | coefficient |
|                              | <= 40                              | 0.01     | 0.04      | 0.31      | coefficient |
|                              | Very important Important           | 0.46     | 0.02      | 25.37     | scale       |
|                              | Important Moderately important     | 3.02     | 0.03      | 92.29     | scale       |
|                              | Moderately important Not important | 6.23     | 0.14      | 42.97     | scale       |
| education                    | Lower                              | 0.04     | 0.03      | 1.47      | coefficient |
|                              | Very important Important           | 0.60     | 0.02      | 39.50     | scale       |
|                              | Important Moderately important     | 3.15     | 0.03      | 100.24    | scale       |
|                              | Moderately important Not important | 6.36     | 0.14      | 43.94     | scale       |
| gender                       | Man                                | 0.54     | 0.03      | 19.79     | coefficient |
|                              | Other/Undisclosed                  | 0.47     | 0.18      | 2.58      | coefficient |
|                              | Very important Important           | 0.75     | 0.02      | 49.03     | scale       |
|                              | Important Moderately important     | 3.32     | 0.03      | 104.16    | scale       |
|                              | Moderately important Not important | 6.53     | 0.14      | 45.10     | scale       |
| healthcare_experience        | Yes                                | -0.23    | 0.03      | -8.82     | coefficient |
|                              | Very important Important           | 0.50     | 0.02      | 31.56     | scale       |
|                              | Important Moderately important     | 3.05     | 0.03      | 96.76     | scale       |
|                              | Moderately important Not important | 6.26     | 0.14      | 43.28     | scale       |
| cognitive_health             | Below average                      | 0.15     | 0.05      | 2.97      | coefficient |
|                              | Very important Important           | 0.60     | 0.01      | 45.89     | scale       |
|                              | Important Moderately important     | 3.15     | 0.03      | 103.43    | scale       |
|                              | Moderately important Not important | 6.36     | 0.14      | 43.99     | scale       |
| mental_health                | Below average                      | 0.06     | 0.04      | 1.59      | coefficient |
|                              | Very important Important           | 0.59     | 0.01      | 44.04     | scale       |
|                              | Important Moderately important     | 3.14     | 0.03      | 102.64    | scale       |
|                              | Moderately important Not important | 6.35     | 0.14      | 43.96     | scale       |
| illness_experience           | Yes                                | -0.06    | 0.03      | -2.41     | coefficient |
|                              | Very important Important           | 0.56     | 0.02      | 34.72     | scale       |
|                              | Important Moderately important     | 3.11     | 0.03      | 97.73     | scale       |
|                              | Moderately important Not important | 6.32     | 0.14      | 43.66     | scale       |
| brain_disease_caregiver      | Yes                                | -0.32    | 0.03      | -12.90    | coefficient |
|                              | Very important Important           | 0.44     | 0.02      | 26.09     | scale       |
|                              | Important Moderately important     | 3.00     | 0.03      | 93.80     | scale       |
|                              | Moderately important Not important | 6.21     | 0.14      | 42.87     | scale       |
| brain_research_participation | Yes                                | -0.11    | 0.03      | -4.50     | coefficient |
|                              | Very important Important           | 0.54     | 0.02      | 32.58     | scale       |
|                              | Important Moderately important     | 3.09     | 0.03      | 96.61     | scale       |
|                              | Moderately important Not important | 6.30     | 0.14      | 43.49     | scale       |
| relationship                 | Yes                                | -0.06    | 0.03      | -2.29     | coefficient |
|                              | Very important Important           | 0.56     | 0.02      | 29.54     | scale       |
|                              | Important Moderately important     | 3.10     | 0.03      | 93.44     | scale       |

1  
2  
3  
4  
5  
6  
7  
8  
9  
10  
11  
12  
13  
14  
15  
16  
17  
18  
19  
20  
21  
22  
23  
24  
25  
26  
27  
28  
29  
30  
31  
32  
33  
34  
35  
36  
37  
38  
39  
40  
41  
42  
43  
44  
45  
46  
47  
48  
49  
50  
51  
52  
53  
54  
55  
56  
57  
58  
59  
60

For peer review only

## 2.3.6 Question 2: ordinal - Old age

| fct                          | term                               | estimate | std.error | statistic | coef.type   |
|------------------------------|------------------------------------|----------|-----------|-----------|-------------|
| age                          | 41-60                              | -0.02    | 0.03      | -0.73     | coefficient |
|                              | <= 40                              | 0.30     | 0.04      | 7.86      | coefficient |
|                              | Very important Important           | 1.02     | 0.02      | 51.00     | scale       |
|                              | Important Moderately important     | 3.21     | 0.03      | 94.19     | scale       |
|                              | Moderately important Not important | 5.63     | 0.10      | 56.36     | scale       |
| education                    | Lower                              | 0.14     | 0.03      | 4.92      | coefficient |
|                              | Very important Important           | 1.03     | 0.02      | 62.27     | scale       |
|                              | Important Moderately important     | 3.21     | 0.03      | 100.08    | scale       |
|                              | Moderately important Not important | 5.63     | 0.10      | 56.74     | scale       |
| gender                       | Man                                | 0.41     | 0.03      | 14.21     | coefficient |
|                              | Other/Undisclosed                  | 0.50     | 0.19      | 2.67      | coefficient |
|                              | Very important Important           | 1.11     | 0.02      | 67.19     | scale       |
|                              | Important Moderately important     | 3.30     | 0.03      | 102.30    | scale       |
|                              | Moderately important Not important | 5.72     | 0.10      | 57.61     | scale       |
| healthcare_experience        | Yes                                | -0.13    | 0.03      | -4.73     | coefficient |
|                              | Very important Important           | 0.93     | 0.02      | 54.50     | scale       |
|                              | Important Moderately important     | 3.11     | 0.03      | 96.61     | scale       |
|                              | Moderately important Not important | 5.53     | 0.10      | 55.76     | scale       |
| cognitive_health             | Below average                      | 0.15     | 0.06      | 2.77      | coefficient |
|                              | Very important Important           | 0.99     | 0.01      | 70.78     | scale       |
|                              | Important Moderately important     | 3.17     | 0.03      | 103.01    | scale       |
|                              | Moderately important Not important | 5.59     | 0.10      | 56.60     | scale       |
| mental_health                | Below average                      | 0.11     | 0.04      | 2.83      | coefficient |
|                              | Very important Important           | 1.00     | 0.01      | 68.38     | scale       |
|                              | Important Moderately important     | 3.18     | 0.03      | 102.29    | scale       |
|                              | Moderately important Not important | 5.60     | 0.10      | 56.61     | scale       |
| illness_experience           | Yes                                | -0.04    | 0.03      | -1.47     | coefficient |
|                              | Very important Important           | 0.97     | 0.02      | 55.33     | scale       |
|                              | Important Moderately important     | 3.15     | 0.03      | 96.92     | scale       |
|                              | Moderately important Not important | 5.57     | 0.10      | 56.04     | scale       |
| brain_disease_caregiver      | Yes                                | -0.26    | 0.03      | -9.43     | coefficient |
|                              | Very important Important           | 0.87     | 0.02      | 48.00     | scale       |
|                              | Important Moderately important     | 3.05     | 0.03      | 93.46     | scale       |
|                              | Moderately important Not important | 5.47     | 0.10      | 55.05     | scale       |
| brain_research_participation | Yes                                | -0.19    | 0.03      | -6.92     | coefficient |
|                              | Very important Important           | 0.90     | 0.02      | 51.14     | scale       |
|                              | Important Moderately important     | 3.08     | 0.03      | 94.99     | scale       |
|                              | Moderately important Not important | 5.50     | 0.10      | 55.42     | scale       |
| relationship                 | Yes                                | -0.08    | 0.03      | -2.82     | coefficient |
|                              | Very important Important           | 0.94     | 0.02      | 46.55     | scale       |
|                              | Important Moderately important     | 3.12     | 0.03      | 91.85     | scale       |



1  
2  
3  
4  
5  
6  
7  
8  
9  
10  
11  
12  
13  
14  
15  
16  
17  
18  
19  
20  
21  
22  
23  
24  
25  
26  
27  
28  
29  
30  
31  
32  
33  
34  
35  
36  
37  
38  
39  
40  
41  
42  
43  
44  
45  
46  
47  
48  
49  
50  
51  
52  
53  
54  
55  
56  
57  
58  
59  
60

**2.4 bin\_vs\_cont**

For peer review only

## 2.4.1 Question 2: bin\_vs\_cont - In the womb

| fct                     | term              | log_odds | std.error | statistic | p.value | cont_term         | cont_beta |
|-------------------------|-------------------|----------|-----------|-----------|---------|-------------------|-----------|
|                         | 41-60             | 0.40     | 0.04      | 10.94     | 0.00    | 41-60             | -0.1      |
| age                     | <= 40             | 0.39     | 0.05      | 8.04      | 0.00    | <= 40             | -0.1      |
| education               | Lower             | -0.52    | 0.03      | -15.42    | 0.00    | Lower             | 0.2       |
|                         | Man               | -0.54    | 0.03      | -15.83    | 0.00    | Man               | 0.2       |
| gender                  | Other/Undisclosed | 0.04     | 0.26      | 0.15      | 0.88    | Other/Undisclosed | -0.0      |
| healthcare_experience   | Yes               | 0.65     | 0.04      | 17.78     | 0.00    | Yes               | -0.2      |
| cognitive_health        | Below average     | -0.51    | 0.06      | -8.47     | 0.00    | Below average     | 0.2       |
| mental_health           | Below average     | -0.14    | 0.05      | -3.00     | 0.00    | Below average     | 0.0       |
| illness_experience      | Yes               | -0.02    | 0.03      | -0.65     | 0.52    | Yes               | 0.0       |
| brain_disease_caregiver | Yes               | 0.24     | 0.03      | 7.35      | 0.00    | Yes               | -0.0      |
| relationship            | Stable            | 0.06     | 0.03      | 1.88      | 0.06    | Stable            | -0.0      |

### 2.4.2 Question 2: bin\_vs\_cont - Childhood

| fct                          | term          | log_odds | std.error | statistic | p.value | cont_term     | cont_beta |
|------------------------------|---------------|----------|-----------|-----------|---------|---------------|-----------|
| age                          | 41-60         | 0.57     | 0.06      | 9.17      | 0.00    | 41-60         | -0.12     |
|                              | <= 40         | 0.64     | 0.09      | 7.26      | 0.00    | <= 40         | -0.18     |
| education                    | Lower         | -0.56    | 0.06      | -9.99     | 0.00    | Lower         | 0.11      |
| gender                       | Man           | -0.52    | 0.06      | -9.23     | 0.00    | Man           | 0.09      |
| healthcare_experience        | Yes           | 0.72     | 0.06      | 11.26     | 0.00    | Yes           | -0.11     |
| cognitive_health             | Below average | -0.58    | 0.09      | -6.21     | 0.00    | Below average | 0.12      |
| illness_experience           | Yes           | -0.08    | 0.06      | -1.48     | 0.14    | Yes           | 0.00      |
| brain_research_participation | Yes           | -0.07    | 0.06      | -1.31     | 0.19    | Yes           | 0.02      |
| relationship                 | Stable        | -0.10    | 0.06      | -1.76     | 0.08    | Stable        | 0.02      |

### 2.4.3 Question 2: bin\_vs\_cont - Adolescence

| fct                   | term          | log_odds | std.error | statistic | p.value | cont_term     | cont_beta | cont_s |
|-----------------------|---------------|----------|-----------|-----------|---------|---------------|-----------|--------|
|                       | 41-60         | 0.54     | 0.07      | 7.18      | 0.00    | 41-60         | -0.10     |        |
| age                   | <= 40         | 0.76     | 0.11      | 6.79      | 0.00    | <= 40         | -0.16     |        |
| education             | Lower         | -0.40    | 0.07      | -5.93     | 0.00    | Lower         | 0.06      |        |
| gender                | Man           | -0.39    | 0.07      | -5.59     | 0.00    | Man           | 0.09      |        |
| healthcare_experience | Yes           | 0.58     | 0.08      | 7.74      | 0.00    | Yes           | -0.09     |        |
| cognitive_health      | Below average | -0.69    | 0.11      | -6.44     | 0.00    | Below average | 0.09      |        |
| relationship          | Stable        | -0.13    | 0.07      | -1.96     | 0.05    | Stable        | 0.03      |        |

#### 2.4.4 Question 2: bin\_vs\_cont - Young adulthood

| fct                     | term              | log_odds | std.error | statistic | p.value | cont_term         | cont_beta |
|-------------------------|-------------------|----------|-----------|-----------|---------|-------------------|-----------|
| age                     | 41-60             | 0.46     | 0.07      | 6.98      | 0.00    | 41-60             | -0.0      |
|                         | <= 40             | 0.19     | 0.08      | 2.35      | 0.02    | <= 40             | -0.0      |
| gender                  | Man               | -0.58    | 0.06      | -9.85     | 0.00    | Man               | 0.1       |
|                         | Other/Undisclosed | -0.68    | 0.35      | -1.96     | 0.05    | Other/Undisclosed | 0.0       |
| healthcare_experience   | Yes               | 0.47     | 0.06      | 7.38      | 0.00    | Yes               | -0.0      |
| cognitive_health        | Below average     | -0.42    | 0.10      | -4.08     | 0.00    | Below average     | 0.0       |
| mental_health           | Below average     | -0.19    | 0.08      | -2.36     | 0.02    | Below average     | 0.0       |
| illness_experience      | Yes               | 0.12     | 0.06      | 2.07      | 0.04    | Yes               | -0.0      |
| brain_disease_caregiver | Yes               | 0.21     | 0.06      | 3.63      | 0.00    | Yes               | -0.0      |

## 2.4.5 Question 2: bin\_vs\_cont - Middle age

| fct                          | term              | log_odds | std.error | statistic | p.value | cont_term         | con |
|------------------------------|-------------------|----------|-----------|-----------|---------|-------------------|-----|
| age                          | 41-60             | 0.52     | 0.07      | 7.17      | 0.00    | 41-60             |     |
|                              | <= 40             | -0.20    | 0.08      | -2.57     | 0.01    | <= 40             |     |
| education                    | Lower             | -0.08    | 0.06      | -1.20     | 0.23    | Lower             |     |
|                              | Man               | -0.89    | 0.06      | -14.53    | 0.00    | Man               |     |
| gender                       | Other/Undisclosed | -1.41    | 0.29      | -4.91     | 0.00    | Other/Undisclosed |     |
|                              | Yes               | 0.43     | 0.07      | 6.47      | 0.00    | Yes               |     |
| healthcare_experience        | Yes               | 0.43     | 0.07      | 6.47      | 0.00    | Yes               |     |
| cognitive_health             | Below average     | -0.43    | 0.11      | -3.98     | 0.00    | Below average     |     |
| mental_health                | Below average     | -0.36    | 0.08      | -4.49     | 0.00    | Below average     |     |
| illness_experience           | Yes               | 0.13     | 0.06      | 2.02      | 0.04    | Yes               |     |
| brain_disease_caregiver      | Yes               | 0.43     | 0.06      | 6.89      | 0.00    | Yes               |     |
| brain_research_participation | Yes               | 0.04     | 0.06      | 0.73      | 0.46    | Yes               |     |
| relationship                 | Stable            | 0.11     | 0.06      | 1.79      | 0.07    | Stable            |     |

#### 2.4.6 Question 2: bin\_vs\_cont - Old age

| fct                          | term              | log_odds | std.error | statistic | p.value | cont_term         | con |
|------------------------------|-------------------|----------|-----------|-----------|---------|-------------------|-----|
| age                          | 41-60             | 0.17     | 0.07      | 2.35      | 0.02    | 41-60             |     |
|                              | <= 40             | -0.60    | 0.08      | -7.93     | 0.00    | <= 40             |     |
| education                    | Lower             | -0.23    | 0.06      | -3.60     | 0.00    | Lower             |     |
|                              | Man               | -0.88    | 0.06      | -14.25    | 0.00    | Man               |     |
| gender                       | Other/Undisclosed | -1.05    | 0.33      | -3.17     | 0.00    | Other/Undisclosed |     |
|                              | Yes               | 0.35     | 0.07      | 5.26      | 0.00    | Yes               |     |
| healthcare_experience        | Yes               | 0.35     | 0.07      | 5.26      | 0.00    | Yes               |     |
| cognitive_health             | Below average     | -0.42    | 0.11      | -3.87     | 0.00    | Below average     |     |
| mental_health                | Below average     | -0.43    | 0.08      | -5.41     | 0.00    | Below average     |     |
| illness_experience           | Yes               | 0.10     | 0.06      | 1.59      | 0.11    | Yes               |     |
| brain_disease_caregiver      | Yes               | 0.34     | 0.06      | 5.48      | 0.00    | Yes               |     |
| brain_research_participation | Yes               | 0.19     | 0.06      | 2.97      | 0.00    | Yes               |     |
| relationship                 | Stable            | 0.19     | 0.06      | 3.09      | 0.00    | Stable            |     |

[[1]] [[1]][[1]] NULL

[[1]][[2]] NULL

[[1]][[3]] NULL

[[1]][[4]] NULL

[[1]][[5]] NULL

[[1]][[6]] NULL

[[2]] [[2]][[1]] NULL

[[2]][[2]] NULL

[[2]][[3]] NULL

[[2]][[4]] NULL

[[2]][[5]] NULL

[[2]][[6]] NULL

[[3]] [[3]][[1]] NULL

[[3]][[2]] NULL

[[3]][[3]] NULL

[[3]][[4]] NULL

[[3]][[5]] NULL

[[3]][[6]] NULL

[[4]] [[4]][[1]] NULL

[[4]][[2]] NULL

[[4]][[3]] NULL

1  
2  
3       [[4]][[4]] NULL

4       [[4]][[5]] NULL

5       [[4]][[6]] NULL  
6  
7  
8  
9  
10  
11  
12  
13  
14  
15  
16  
17  
18  
19  
20  
21  
22  
23  
24  
25  
26  
27  
28  
29  
30  
31  
32  
33  
34  
35  
36  
37  
38  
39  
40  
41  
42  
43  
44  
45  
46  
47  
48  
49  
50  
51  
52  
53  
54  
55  
56  
57  
58  
59  
60

For peer review only



1  
2  
3  
4  
5  
6  
7  
8  
9  
10  
11  
12  
13  
14  
15  
16  
17  
18  
19  
20  
21  
22  
23  
24  
25  
26  
27  
28  
29  
30  
31  
32  
33  
34  
35  
36  
37  
38  
39  
40  
41  
42  
43  
44  
45  
46  
47  
48  
49  
50  
51  
52  
53  
54  
55  
56  
57  
58  
59  
60

**3 Question 3**

**3.1 binary**

For peer review only

## 3.1.1 Question 3: binary - Alzheimer's

| fct                          | term              | estimate | std.error | statistic | p.value |
|------------------------------|-------------------|----------|-----------|-----------|---------|
|                              | (Intercept)       | 4.97     | 0.11      | 46.45     | 0.00    |
| age                          | 41-60             | 0.08     | 0.16      | 0.47      | 0.64    |
|                              | <= 40             | -1.06    | 0.15      | -6.97     | 0.00    |
| education                    | (Intercept)       | 5.02     | 0.09      | 55.72     | 0.00    |
|                              | Lower             | -0.74    | 0.13      | -5.72     | 0.00    |
| gender                       | (Intercept)       | 5.07     | 0.09      | 55.85     | 0.00    |
|                              | Man               | -0.91    | 0.13      | -7.05     | 0.00    |
|                              | Other/Undisclosed | 12.49    | 352.44    | 0.04      | 0.97    |
| healthcare_experience        | (Intercept)       | 4.47     | 0.07      | 61.46     | 0.00    |
|                              | Yes               | 0.86     | 0.16      | 5.45      | 0.00    |
| cognitive_health             | (Intercept)       | 4.75     | 0.07      | 70.47     | 0.00    |
|                              | Below average     | -0.35    | 0.23      | -1.48     | 0.14    |
| mental_health                | (Intercept)       | 4.80     | 0.07      | 66.87     | 0.00    |
|                              | Below average     | -0.44    | 0.16      | -2.69     | 0.01    |
| illness_experience           | (Intercept)       | 4.89     | 0.09      | 53.86     | 0.00    |
|                              | Yes               | -0.38    | 0.13      | -2.91     | 0.00    |
| brain_disease_caregiver      | (Intercept)       | 4.41     | 0.08      | 58.21     | 0.00    |
|                              | Yes               | 0.85     | 0.14      | 5.86      | 0.00    |
| brain_research_participation | (Intercept)       | 4.46     | 0.08      | 59.30     | 0.00    |
|                              | Yes               | 0.78     | 0.15      | 5.29      | 0.00    |
| relationship                 | (Intercept)       | 4.42     | 0.08      | 52.85     | 0.00    |
|                              | Stable            | 0.65     | 0.13      | 4.90      | 0.00    |

## 3.1.2 Question 3: binary - Schizophrenia

| fct                          | term              | estimate | std.error | statistic | p.value |
|------------------------------|-------------------|----------|-----------|-----------|---------|
|                              | (Intercept)       | 2.98     | 0.04      | 72.17     | 0.00    |
| age                          | 41-60             | 0.38     | 0.07      | 5.62      | 0.00    |
|                              | <= 40             | 0.29     | 0.09      | 3.28      | 0.00    |
| education                    | (Intercept)       | 3.33     | 0.04      | 83.62     | 0.00    |
|                              | Lower             | -0.48    | 0.06      | -7.79     | 0.00    |
| gender                       | (Intercept)       | 3.30     | 0.04      | 85.53     | 0.00    |
|                              | Man               | -0.45    | 0.06      | -7.11     | 0.00    |
|                              | Other/Undisclosed | -0.31    | 0.42      | -0.73     | 0.47    |
| healthcare_experience        | (Intercept)       | 3.01     | 0.04      | 82.83     | 0.00    |
|                              | Yes               | 0.42     | 0.07      | 6.33      | 0.00    |
| cognitive_health             | (Intercept)       | 3.21     | 0.03      | 99.65     | 0.00    |
|                              | Below average     | -0.74    | 0.10      | -7.54     | 0.00    |
| mental_health                | (Intercept)       | 3.15     | 0.03      | 96.65     | 0.00    |
|                              | Below average     | 0.00     | 0.09      | 0.03      | 0.97    |
| illness_experience           | (Intercept)       | 3.22     | 0.04      | 79.23     | 0.00    |
|                              | Yes               | -0.17    | 0.06      | -2.74     | 0.01    |
| brain_disease_caregiver      | (Intercept)       | 3.06     | 0.04      | 76.83     | 0.00    |
|                              | Yes               | 0.22     | 0.06      | 3.58      | 0.00    |
| brain_research_participation | (Intercept)       | 3.02     | 0.04      | 79.51     | 0.00    |
|                              | Yes               | 0.33     | 0.06      | 5.23      | 0.00    |
| relationship                 | (Intercept)       | 3.18     | 0.05      | 68.62     | 0.00    |
|                              | Stable            | -0.04    | 0.06      | -0.69     | 0.49    |

## 3.1.3 Question 3: binary - Depression

| fct                          | term              | estimate | std.error | statistic | p.value |
|------------------------------|-------------------|----------|-----------|-----------|---------|
|                              | (Intercept)       | 2.79     | 0.04      | 73.54     | 0.00    |
| age                          | 41-60             | 0.42     | 0.06      | 6.55      | 0.00    |
|                              | <= 40             | 0.26     | 0.08      | 3.15      | 0.00    |
| education                    | (Intercept)       | 3.08     | 0.04      | 86.76     | 0.00    |
|                              | Lower             | -0.33    | 0.06      | -5.67     | 0.00    |
| gender                       | (Intercept)       | 3.08     | 0.03      | 88.33     | 0.00    |
|                              | Man               | -0.36    | 0.06      | -6.21     | 0.00    |
|                              | Other/Undisclosed | 0.10     | 0.46      | 0.23      | 0.82    |
| healthcare_experience        | (Intercept)       | 2.85     | 0.03      | 84.24     | 0.00    |
|                              | Yes               | 0.32     | 0.06      | 5.38      | 0.00    |
| cognitive_health             | (Intercept)       | 2.99     | 0.03      | 102.71    | 0.00    |
|                              | Below average     | -0.31    | 0.10      | -2.94     | 0.00    |
| mental_health                | (Intercept)       | 2.93     | 0.03      | 99.39     | 0.00    |
|                              | Below average     | 0.34     | 0.09      | 3.63      | 0.00    |
| illness_experience           | (Intercept)       | 2.97     | 0.04      | 81.99     | 0.00    |
|                              | Yes               | 0.00     | 0.06      | -0.02     | 0.99    |
| brain_disease_caregiver      | (Intercept)       | 2.87     | 0.04      | 78.49     | 0.00    |
|                              | Yes               | 0.23     | 0.06      | 4.04      | 0.00    |
| brain_research_participation | (Intercept)       | 2.84     | 0.04      | 81.08     | 0.00    |
|                              | Yes               | 0.32     | 0.06      | 5.49      | 0.00    |
| relationship                 | (Intercept)       | 2.98     | 0.04      | 70.44     | 0.00    |
|                              | Stable            | -0.02    | 0.06      | -0.30     | 0.76    |

## 3.1.4 Question 3: binary - Bipolar

| fct                          | term              | estimate | std.error | statistic | p.value |
|------------------------------|-------------------|----------|-----------|-----------|---------|
|                              | (Intercept)       | 2.08     | 0.03      | 73.75     | 0.00    |
| age                          | 41-60             | 0.78     | 0.05      | 15.01     | 0.00    |
|                              | <= 40             | 0.64     | 0.07      | 9.40      | 0.00    |
| education                    | (Intercept)       | 2.76     | 0.03      | 89.77     | 0.00    |
|                              | Lower             | -0.86    | 0.04      | -19.41    | 0.00    |
| gender                       | (Intercept)       | 2.68     | 0.03      | 91.92     | 0.00    |
|                              | Man               | -0.75    | 0.04      | -16.70    | 0.00    |
|                              | Other/Undisclosed | 0.01     | 0.37      | 0.03      | 0.98    |
| healthcare_experience        | (Intercept)       | 2.19     | 0.03      | 85.72     | 0.00    |
|                              | Yes               | 0.70     | 0.05      | 13.78     | 0.00    |
| cognitive_health             | (Intercept)       | 2.45     | 0.02      | 106.57    | 0.00    |
|                              | Below average     | -0.49    | 0.08      | -6.29     | 0.00    |
| mental_health                | (Intercept)       | 2.39     | 0.02      | 102.47    | 0.00    |
|                              | Below average     | 0.25     | 0.07      | 3.60      | 0.00    |
| illness_experience           | (Intercept)       | 2.42     | 0.03      | 84.89     | 0.00    |
|                              | Yes               | -0.01    | 0.04      | -0.29     | 0.77    |
| brain_disease_caregiver      | (Intercept)       | 2.25     | 0.03      | 80.16     | 0.00    |
|                              | Yes               | 0.41     | 0.05      | 8.97      | 0.00    |
| brain_research_participation | (Intercept)       | 2.26     | 0.03      | 82.64     | 0.00    |
|                              | Yes               | 0.41     | 0.05      | 8.96      | 0.00    |
| relationship                 | (Intercept)       | 2.52     | 0.03      | 72.89     | 0.00    |
|                              | Stable            | -0.18    | 0.04      | -3.92     | 0.00    |

## 3.1.5 Question 3: binary - Anxiety

| fct                          | term              | estimate | std.error | statistic | p.value |
|------------------------------|-------------------|----------|-----------|-----------|---------|
|                              | (Intercept)       | 2.09     | 0.03      | 73.83     | 0.00    |
| age                          | 41-60             | 0.43     | 0.05      | 9.24      | 0.00    |
|                              | <= 40             | 0.37     | 0.06      | 5.91      | 0.00    |
| education                    | (Intercept)       | 2.39     | 0.03      | 91.09     | 0.00    |
|                              | Lower             | -0.29    | 0.04      | -6.68     | 0.00    |
| gender                       | (Intercept)       | 2.36     | 0.03      | 92.74     | 0.00    |
|                              | Man               | -0.23    | 0.04      | -5.17     | 0.00    |
|                              | Other/Undisclosed | 0.63     | 0.42      | 1.51      | 0.13    |
| healthcare_experience        | (Intercept)       | 2.22     | 0.03      | 85.81     | 0.00    |
|                              | Yes               | 0.22     | 0.04      | 5.02      | 0.00    |
| cognitive_health             | (Intercept)       | 2.31     | 0.02      | 106.50    | 0.00    |
|                              | Below average     | -0.19    | 0.08      | -2.35     | 0.02    |
| mental_health                | (Intercept)       | 2.25     | 0.02      | 102.17    | 0.00    |
|                              | Below average     | 0.41     | 0.07      | 5.85      | 0.00    |
| illness_experience           | (Intercept)       | 2.27     | 0.03      | 84.71     | 0.00    |
|                              | Yes               | 0.07     | 0.04      | 1.63      | 0.10    |
| brain_disease_caregiver      | (Intercept)       | 2.21     | 0.03      | 80.03     | 0.00    |
|                              | Yes               | 0.19     | 0.04      | 4.55      | 0.00    |
| brain_research_participation | (Intercept)       | 2.18     | 0.03      | 82.34     | 0.00    |
|                              | Yes               | 0.28     | 0.04      | 6.49      | 0.00    |
| relationship                 | (Intercept)       | 2.30     | 0.03      | 72.91     | 0.00    |
|                              | Stable            | 0.00     | 0.04      | 0.00      | 1.00    |

## 3.1.6 Question 3: binary - Addiction

| fct                          | term              | estimate | std.error | statistic | p.value |
|------------------------------|-------------------|----------|-----------|-----------|---------|
|                              | (Intercept)       | 1.86     | 0.03      | 71.70     | 0.00    |
| age                          | 41-60             | 0.31     | 0.04      | 7.54      | 0.00    |
|                              | <= 40             | 0.41     | 0.06      | 7.06      | 0.00    |
| education                    | (Intercept)       | 2.20     | 0.02      | 90.62     | 0.00    |
|                              | Lower             | -0.47    | 0.04      | -12.10    | 0.00    |
| gender                       | (Intercept)       | 2.20     | 0.02      | 92.28     | 0.00    |
|                              | Man               | -0.51    | 0.04      | -12.94    | 0.00    |
|                              | Other/Undisclosed | 0.05     | 0.30      | 0.17      | 0.86    |
| healthcare_experience        | (Intercept)       | 1.81     | 0.02      | 81.89     | 0.00    |
|                              | Yes               | 0.68     | 0.04      | 15.89     | 0.00    |
| cognitive_health             | (Intercept)       | 2.06     | 0.02      | 104.94    | 0.00    |
|                              | Below average     | -0.38    | 0.07      | -5.35     | 0.00    |
| mental_health                | (Intercept)       | 2.02     | 0.02      | 100.44    | 0.00    |
|                              | Below average     | 0.11     | 0.06      | 1.99      | 0.05    |
| illness_experience           | (Intercept)       | 2.02     | 0.02      | 83.23     | 0.00    |
|                              | Yes               | 0.03     | 0.04      | 0.76      | 0.45    |
| brain_disease_caregiver      | (Intercept)       | 1.93     | 0.02      | 77.93     | 0.00    |
|                              | Yes               | 0.23     | 0.04      | 6.04      | 0.00    |
| brain_research_participation | (Intercept)       | 1.93     | 0.02      | 80.24     | 0.00    |
|                              | Yes               | 0.26     | 0.04      | 6.82      | 0.00    |
| relationship                 | (Intercept)       | 2.11     | 0.03      | 72.19     | 0.00    |
|                              | Stable            | -0.13    | 0.04      | -3.46     | 0.00    |

## 3.1.7 Question 3: binary - Stroke

| fct                          | term              | estimate | std.error | statistic | p.value |
|------------------------------|-------------------|----------|-----------|-----------|---------|
|                              | (Intercept)       | 1.97     | 0.03      | 72.84     | 0.00    |
| age                          | 41-60             | 0.15     | 0.04      | 3.60      | 0.00    |
|                              | <= 40             | -0.27    | 0.05      | -5.49     | 0.00    |
| education                    | (Intercept)       | 2.02     | 0.02      | 89.24     | 0.00    |
|                              | Lower             | -0.14    | 0.04      | -3.60     | 0.00    |
| gender                       | (Intercept)       | 2.19     | 0.02      | 92.21     | 0.00    |
|                              | Man               | -0.64    | 0.04      | -16.91    | 0.00    |
|                              | Other/Undisclosed | -0.02    | 0.29      | -0.08     | 0.93    |
| healthcare_experience        | (Intercept)       | 1.70     | 0.02      | 79.82     | 0.00    |
|                              | Yes               | 0.89     | 0.04      | 20.45     | 0.00    |
| cognitive_health             | (Intercept)       | 1.98     | 0.02      | 104.04    | 0.00    |
|                              | Below average     | -0.20    | 0.07      | -2.69     | 0.01    |
| mental_health                | (Intercept)       | 1.98     | 0.02      | 100.01    | 0.00    |
|                              | Below average     | -0.09    | 0.05      | -1.71     | 0.09    |
| illness_experience           | (Intercept)       | 1.88     | 0.02      | 81.56     | 0.00    |
|                              | Yes               | 0.25     | 0.04      | 6.56      | 0.00    |
| brain_disease_caregiver      | (Intercept)       | 1.77     | 0.02      | 75.70     | 0.00    |
|                              | Yes               | 0.48     | 0.04      | 12.70     | 0.00    |
| brain_research_participation | (Intercept)       | 1.88     | 0.02      | 79.61     | 0.00    |
|                              | Yes               | 0.23     | 0.04      | 6.17      | 0.00    |
| relationship                 | (Intercept)       | 1.88     | 0.03      | 70.25     | 0.00    |
|                              | Stable            | 0.16     | 0.04      | 4.31      | 0.00    |



## 3.1.8 Question 3: binary - Parkinson's

| fct                          | term              | estimate | std.error | statistic | p.value |
|------------------------------|-------------------|----------|-----------|-----------|---------|
|                              | (Intercept)       | 1.82     | 0.03      | 71.15     | 0.00    |
| age                          | 41-60             | 0.12     | 0.04      | 3.13      | 0.00    |
|                              | <= 40             | -0.22    | 0.05      | -4.62     | 0.00    |
| education                    | (Intercept)       | 1.99     | 0.02      | 88.93     | 0.00    |
|                              | Lower             | -0.46    | 0.04      | -12.87    | 0.00    |
| gender                       | (Intercept)       | 1.89     | 0.02      | 89.32     | 0.00    |
|                              | Man               | -0.21    | 0.04      | -5.63     | 0.00    |
|                              | Other/Undisclosed | -0.16    | 0.25      | -0.64     | 0.52    |
| healthcare_experience        | (Intercept)       | 1.59     | 0.02      | 77.61     | 0.00    |
|                              | Yes               | 0.72     | 0.04      | 18.08     | 0.00    |
| cognitive_health             | (Intercept)       | 1.84     | 0.02      | 101.83    | 0.00    |
|                              | Below average     | -0.26    | 0.07      | -3.84     | 0.00    |
| mental_health                | (Intercept)       | 1.85     | 0.02      | 98.00     | 0.00    |
|                              | Below average     | -0.17    | 0.05      | -3.47     | 0.00    |
| illness_experience           | (Intercept)       | 1.79     | 0.02      | 80.32     | 0.00    |
|                              | Yes               | 0.08     | 0.04      | 2.33      | 0.02    |
| brain_disease_caregiver      | (Intercept)       | 1.67     | 0.02      | 73.91     | 0.00    |
|                              | Yes               | 0.37     | 0.04      | 10.34     | 0.00    |
| brain_research_participation | (Intercept)       | 1.69     | 0.02      | 76.56     | 0.00    |
|                              | Yes               | 0.35     | 0.04      | 9.55      | 0.00    |
| relationship                 | (Intercept)       | 1.73     | 0.03      | 68.21     | 0.00    |
|                              | Stable            | 0.17     | 0.03      | 4.86      | 0.00    |

## 3.1.9 Question 3: binary - Migraine

| fct                          | term              | estimate | std.error | statistic | p.value |
|------------------------------|-------------------|----------|-----------|-----------|---------|
|                              | (Intercept)       | 1.24     | 0.02      | 58.41     | 0.00    |
| age                          | 41-60             | 0.57     | 0.04      | 16.21     | 0.00    |
|                              | <= 40             | 0.78     | 0.05      | 15.24     | 0.00    |
| education                    | (Intercept)       | 1.68     | 0.02      | 83.96     | 0.00    |
|                              | Lower             | -0.38    | 0.03      | -11.48    | 0.00    |
| gender                       | (Intercept)       | 1.62     | 0.02      | 84.32     | 0.00    |
|                              | Man               | -0.25    | 0.03      | -7.46     | 0.00    |
|                              | Other/Undisclosed | 0.04     | 0.24      | 0.18      | 0.86    |
| healthcare_experience        | (Intercept)       | 1.36     | 0.02      | 71.15     | 0.00    |
|                              | Yes               | 0.56     | 0.03      | 16.24     | 0.00    |
| cognitive_health             | (Intercept)       | 1.57     | 0.02      | 95.25     | 0.00    |
|                              | Below average     | -0.28    | 0.06      | -4.46     | 0.00    |
| mental_health                | (Intercept)       | 1.55     | 0.02      | 90.96     | 0.00    |
|                              | Below average     | 0.02     | 0.05      | 0.46      | 0.65    |
| illness_experience           | (Intercept)       | 1.51     | 0.02      | 74.37     | 0.00    |
|                              | Yes               | 0.11     | 0.03      | 3.28      | 0.00    |
| brain_disease_caregiver      | (Intercept)       | 1.44     | 0.02      | 68.88     | 0.00    |
|                              | Yes               | 0.23     | 0.03      | 7.25      | 0.00    |
| brain_research_participation | (Intercept)       | 1.51     | 0.02      | 72.60     | 0.00    |
|                              | Yes               | 0.10     | 0.03      | 3.06      | 0.00    |
| relationship                 | (Intercept)       | 1.53     | 0.02      | 64.47     | 0.00    |
|                              | Stable            | 0.03     | 0.03      | 1.07      | 0.29    |

## 3.1.10 Question 3: binary - Cancer

| fct                          | term              | estimate | std.error | statistic | p.value |
|------------------------------|-------------------|----------|-----------|-----------|---------|
|                              | (Intercept)       | -0.92    | 0.02      | -46.91    | 0.00    |
| age                          | 41-60             | 0.26     | 0.03      | 9.11      | 0.00    |
|                              | <= 40             | 0.44     | 0.04      | 12.00     | 0.00    |
| education                    | (Intercept)       | -0.66    | 0.02      | -42.71    | 0.00    |
|                              | Lower             | -0.31    | 0.03      | -10.70    | 0.00    |
| gender                       | (Intercept)       | -0.67    | 0.02      | -44.48    | 0.00    |
|                              | Man               | -0.28    | 0.03      | -9.47     | 0.00    |
|                              | Other/Undisclosed | 0.15     | 0.18      | 0.82      | 0.41    |
| healthcare_experience        | (Intercept)       | -0.97    | 0.02      | -56.53    | 0.00    |
|                              | Yes               | 0.56     | 0.03      | 21.18     | 0.00    |
| cognitive_health             | (Intercept)       | -0.74    | 0.01      | -55.40    | 0.00    |
|                              | Below average     | -0.19    | 0.06      | -3.45     | 0.00    |
| mental_health                | (Intercept)       | -0.76    | 0.01      | -54.68    | 0.00    |
|                              | Below average     | 0.09     | 0.04      | 2.29      | 0.02    |
| illness_experience           | (Intercept)       | -0.80    | 0.02      | -47.23    | 0.00    |
|                              | Yes               | 0.12     | 0.03      | 4.61      | 0.00    |
| brain_disease_caregiver      | (Intercept)       | -0.86    | 0.02      | -47.50    | 0.00    |
|                              | Yes               | 0.23     | 0.03      | 8.84      | 0.00    |
| brain_research_participation | (Intercept)       | -0.81    | 0.02      | -46.92    | 0.00    |
|                              | Yes               | 0.15     | 0.03      | 5.82      | 0.00    |
| relationship                 | (Intercept)       | -0.75    | 0.02      | -38.60    | 0.00    |
|                              | Stable            | 0.01     | 0.03      | 0.24      | 0.81    |

## 3.1.11 Question 3: binary - Hypertension

| fct                          | term              | estimate | std.error | statistic | p.value |
|------------------------------|-------------------|----------|-----------|-----------|---------|
|                              | (Intercept)       | -0.66    | 0.02      | -35.09    | 0.00    |
| age                          | 41-60             | -0.12    | 0.03      | -4.33     | 0.00    |
|                              | <= 40             | -0.42    | 0.04      | -10.84    | 0.00    |
| education                    | (Intercept)       | -0.69    | 0.02      | -44.50    | 0.00    |
|                              | Lower             | -0.26    | 0.03      | -9.25     | 0.00    |
| gender                       | (Intercept)       | -0.67    | 0.02      | -44.65    | 0.00    |
|                              | Man               | -0.34    | 0.03      | -11.55    | 0.00    |
|                              | Other/Undisclosed | 0.32     | 0.18      | 1.77      | 0.08    |
| healthcare_experience        | (Intercept)       | -1.10    | 0.02      | -62.05    | 0.00    |
|                              | Yes               | 0.80     | 0.03      | 30.39     | 0.00    |
| cognitive_health             | (Intercept)       | -0.76    | 0.01      | -56.94    | 0.00    |
|                              | Below average     | -0.11    | 0.06      | -1.95     | 0.05    |
| mental_health                | (Intercept)       | -0.74    | 0.01      | -53.62    | 0.00    |
|                              | Below average     | -0.19    | 0.04      | -4.82     | 0.00    |
| illness_experience           | (Intercept)       | -0.84    | 0.02      | -49.49    | 0.00    |
|                              | Yes               | 0.18     | 0.03      | 7.04      | 0.00    |
| brain_disease_caregiver      | (Intercept)       | -0.97    | 0.02      | -52.58    | 0.00    |
|                              | Yes               | 0.42     | 0.03      | 16.24     | 0.00    |
| brain_research_participation | (Intercept)       | -0.86    | 0.02      | -48.95    | 0.00    |
|                              | Yes               | 0.20     | 0.03      | 7.80      | 0.00    |
| relationship                 | (Intercept)       | -0.81    | 0.02      | -41.17    | 0.00    |
|                              | Stable            | 0.08     | 0.03      | 2.96      | 0.00    |

## 3.1.12 Question 3: binary - Diabetes

| fct                          | term              | estimate | std.error | statistic | p.value |
|------------------------------|-------------------|----------|-----------|-----------|---------|
|                              | (Intercept)       | -1.71    | 0.02      | -69.58    | 0.00    |
| age                          | 41-60             | 0.14     | 0.04      | 4.01      | 0.00    |
|                              | <= 40             | -0.04    | 0.05      | -0.91     | 0.36    |
| education                    | (Intercept)       | -1.56    | 0.02      | -81.30    | 0.00    |
|                              | Lower             | -0.36    | 0.04      | -9.50     | 0.00    |
| gender                       | (Intercept)       | -1.61    | 0.02      | -83.95    | 0.00    |
|                              | Man               | -0.22    | 0.04      | -5.85     | 0.00    |
|                              | Other/Undisclosed | 0.53     | 0.21      | 2.59      | 0.01    |
| healthcare_experience        | (Intercept)       | -2.13    | 0.02      | -85.37    | 0.00    |
|                              | Yes               | 1.00     | 0.03      | 29.61     | 0.00    |
| cognitive_health             | (Intercept)       | -1.66    | 0.02      | -97.96    | 0.00    |
|                              | Below average     | -0.02    | 0.07      | -0.27     | 0.79    |
| mental_health                | (Intercept)       | -1.64    | 0.02      | -93.62    | 0.00    |
|                              | Below average     | -0.19    | 0.05      | -3.63     | 0.00    |
| illness_experience           | (Intercept)       | -1.76    | 0.02      | -79.82    | 0.00    |
|                              | Yes               | 0.23     | 0.03      | 6.82      | 0.00    |
| brain_disease_caregiver      | (Intercept)       | -1.85    | 0.02      | -76.95    | 0.00    |
|                              | Yes               | 0.38     | 0.03      | 11.36     | 0.00    |
| brain_research_participation | (Intercept)       | -1.75    | 0.02      | -77.66    | 0.00    |
|                              | Yes               | 0.18     | 0.03      | 5.48      | 0.00    |
| relationship                 | (Intercept)       | -1.66    | 0.02      | -67.06    | 0.00    |
|                              | Stable            | -0.01    | 0.03      | -0.16     | 0.87    |

## 3.1.13 Question 3: binary - Arthritis

| fct                          | term              | estimate | std.error | statistic | p.value |
|------------------------------|-------------------|----------|-----------|-----------|---------|
|                              | (Intercept)       | -3.05    | 0.04      | -71.56    | 0.00    |
| age                          | 41-60             | 0.14     | 0.06      | 2.28      | 0.02    |
|                              | <= 40             | 0.01     | 0.08      | 0.11      | 0.91    |
| education                    | (Intercept)       | -2.97    | 0.03      | -87.93    | 0.00    |
|                              | Lower             | -0.06    | 0.06      | -0.95     | 0.34    |
| gender                       | (Intercept)       | -2.92    | 0.03      | -90.08    | 0.00    |
|                              | Man               | -0.29    | 0.07      | -4.29     | 0.00    |
|                              | Other/Undisclosed | 0.23     | 0.37      | 0.62      | 0.54    |
| healthcare_experience        | (Intercept)       | -3.34    | 0.04      | -78.93    | 0.00    |
|                              | Yes               | 0.75     | 0.06      | 13.23     | 0.00    |
| cognitive_health             | (Intercept)       | -3.01    | 0.03      | -102.46   | 0.00    |
|                              | Below average     | 0.29     | 0.11      | 2.70      | 0.01    |
| mental_health                | (Intercept)       | -2.98    | 0.03      | -98.79    | 0.00    |
|                              | Below average     | -0.05    | 0.08      | -0.53     | 0.60    |
| illness_experience           | (Intercept)       | -3.20    | 0.04      | -79.49    | 0.00    |
|                              | Yes               | 0.47     | 0.06      | 8.25      | 0.00    |
| brain_disease_caregiver      | (Intercept)       | -3.12    | 0.04      | -76.19    | 0.00    |
|                              | Yes               | 0.26     | 0.06      | 4.67      | 0.00    |
| brain_research_participation | (Intercept)       | -3.01    | 0.04      | -79.67    | 0.00    |
|                              | Yes               | 0.04     | 0.06      | 0.65      | 0.52    |
| relationship                 | (Intercept)       | -2.90    | 0.04      | -71.01    | 0.00    |
|                              | Stable            | -0.16    | 0.06      | -2.84     | 0.00    |

[[1]] [[1]][[1]] NULL

[[1]][[2]] NULL

[[1]][[3]] NULL

[[1]][[4]] NULL

[[1]][[5]] NULL

[[1]][[6]] NULL

[[1]][[7]] NULL

[[1]][[8]] NULL

[[1]][[9]] NULL

[[1]][[10]] NULL

[[1]][[11]] NULL

[[1]][[12]] NULL

1  
2  
3  
4  
5  
6  
7  
8  
9  
10  
11  
12  
13  
14  
15  
16  
17  
18  
19  
20  
21  
22  
23  
24  
25  
26  
27  
28  
29  
30  
31  
32  
33  
34  
35  
36  
37  
38  
39  
40  
41  
42  
43  
44  
45  
46  
47  
48  
49  
50  
51  
52  
53  
54  
55  
56  
57  
58  
59  
60

[[1]][[13]] NULL

For peer review only

| SUPPLEMENTARY MATERIAL 1. Demographic characteristics across countries |               |                |                |                |              |                |              |                |              |                |              |                |              |                |            |                |              |                |
|------------------------------------------------------------------------|---------------|----------------|----------------|----------------|--------------|----------------|--------------|----------------|--------------|----------------|--------------|----------------|--------------|----------------|------------|----------------|--------------|----------------|
| Respondents                                                            | All countries | %              | United Kingdom | %              | Netherlands  | %              | Norway       | %              | Spain        | %              | Denmark      | %              | Germany      | %              | Sweden     | %              | Other        | %              |
| Women                                                                  | 19,626        | 71.1 %         | 7,536          | 74.2 %         | 5,304        | 75.5 %         | 2,934        | 82.7 %         | 890          | 42.5 %         | 703          | 63.9 %         | 441          | 41.6 %         | 648        | 85.3 %         | 1,170        | 63.5 %         |
| Men                                                                    | 7,833         | 28.4 %         | 2,591          | 25.5 %         | 1,698        | 24.2 %         | 602          | 17.0 %         | 1,195        | 57.0 %         | 394          | 35.8 %         | 598          | 56.4 %         | 106        | 13.9 %         | 649          | 35.2 %         |
| Other                                                                  | 131           | 0.5 %          | 33             | 0.3 %          | 21           | 0.3 %          | 13           | 0.4 %          | 10           | 0.5 %          | 4            | 0.4 %          | 21           | 2.0 %          | 6          | 0.8 %          | 23           | 1.2 %          |
| <b>Total</b>                                                           | <b>27,590</b> | <b>100.0 %</b> | <b>10,160</b>  | <b>100.0 %</b> | <b>7,023</b> | <b>100.0 %</b> | <b>3,549</b> | <b>100.0 %</b> | <b>2,095</b> | <b>100.0 %</b> | <b>1,101</b> | <b>100.0 %</b> | <b>1,060</b> | <b>100.0 %</b> | <b>760</b> | <b>100.0 %</b> | <b>1,842</b> | <b>100.0 %</b> |
| <b>Age range (years)</b>                                               |               |                |                |                |              |                |              |                |              |                |              |                |              |                |            |                |              |                |
| <40                                                                    | 4,502         | 16.4 %         | 840            | 8.3 %          | 414          | 5.9 %          | 1,135        | 32 %           | 272          | 13 %           | 328          | 29.8 %         | 379          | 35.8 %         | 239        | 31.4 %         | 895          | 48.6 %         |
| 41-60                                                                  | 10,328        | 37.4 %         | 3,373          | 33.2 %         | 2,464        | 35.1 %         | 1,600        | 45.1 %         | 1,285        | 61.3 %         | 400          | 36.3 %         | 237          | 22.4 %         | 377        | 49.6 %         | 592          | 32.1 %         |
| >60                                                                    | 12,760        | 46.2 %         | 5,947          | 58.6 %         | 4,145        | 59.0 %         | 814          | 22.9 %         | 538          | 25.7 %         | 373          | 33.9 %         | 444          | 41.8 %         | 144        | 18.9 %         | 355          | 19.2 %         |
| <b>Education</b>                                                       |               |                |                |                |              |                |              |                |              |                |              |                |              |                |            |                |              |                |
| Higher education                                                       | 18,925        | 68.6 %         | 6,954          | 68.4 %         | 4,279        | 60.9 %         | 2,936        | 82.7 %         | 1,415        | 67.5 %         | 731          | 66.4 %         | 699          | 65.9 %         | 529        | 69.6 %         | 1,382        | 75.0 %         |
| Lower education                                                        | 8,665         | 31.4 %         | 3,206          | 31.6 %         | 2,744        | 39.1 %         | 613          | 17.2 %         | 680          | 32.4 %         | 370          | 33.6 %         | 361          | 34.0 %         | 231        | 30.4 %         | 460          | 25.0 %         |
| <b>Relationship status</b>                                             |               |                |                |                |              |                |              |                |              |                |              |                |              |                |            |                |              |                |
| Married or in a stable relationship                                    | 19,819        | 71.8 %         | 7,545          | 74.3 %         | 4,947        | 70.4 %         | 2,663        | 75.0 %         | 1,480        | 70.6 %         | 754          | 68.5 %         | 708          | 66.8 %         | 529        | 69.6 %         | 1,193        | 64.8 %         |
| Not in a stable relationship                                           | 7,771         | 28.2 %         | 2,615          | 25.7 %         | 2,076        | 29.6 %         | 886          | 25.0 %         | 615          | 29.4 %         | 347          | 31.5 %         | 352          | 33.2 %         | 231        | 30.4 %         | 649          | 35.2 %         |
| <b>Occupation*</b>                                                     |               |                |                |                |              |                |              |                |              |                |              |                |              |                |            |                |              |                |
| Employed for wages                                                     | 14,181        | 51.4 %         | 4,426          | 43.6 %         | 3,089        | 44.0 %         | 2,507        | 70.6 %         | 1,418        | 67.7 %         | 645          | 58.6 %         | 516          | 48.7 %         | 546        | 71.8 %         | 1,034        | 56.1 %         |
| Retired                                                                | 10,550        | 38.2 %         | 5,334          | 52.5 %         | 3,117        | 44.4 %         | 533          | 15.0 %         | 431          | 20.6 %         | 315          | 28.6 %         | 408          | 38.5 %         | 114        | 15.0 %         | 298          | 16.2 %         |
| Other                                                                  | 9,708         | 35.2 %         | 3,188          | 31.3 %         | 2,596        | 37.0 %         | 1,227        | 34.5 %         | 900          | 42.9 %         | 305          | 27.7 %         | 353          | 33.3 %         | 226        | 29.8 %         | 913          | 49.6 %         |
| <b>Employment and/or education in health care</b>                      |               |                |                |                |              |                |              |                |              |                |              |                |              |                |            |                |              |                |
| No                                                                     | 16,955        | 61.5 %         | 6,457          | 63.6 %         | 4,275        | 60.9 %         | 2,070        | 58.3 %         | 1,334        | 63.7 %         | 621          | 56.4 %         | 692          | 65.3 %         | 464        | 61.1 %         | 1,042        | 56.6 %         |
| Yes                                                                    | 10,635        | 38.5 %         | 3,703          | 36.4 %         | 2,748        | 39.1 %         | 1,479        | 41.7 %         | 761          | 36.3 %         | 480          | 43.6 %         | 368          | 34.7 %         | 296        | 38.9 %         | 800          | 43.4 %         |
| <b>Participation in brain research</b>                                 |               |                |                |                |              |                |              |                |              |                |              |                |              |                |            |                |              |                |
| No                                                                     | 15,671        | 56.8 %         | 4,131          | 40.7 %         | 3,906        | 55.6 %         | 2,915        | 82.1 %         | 831          | 39.7 %         | 976          | 88.6 %         | 774          | 73.0 %         | 687        | 90.4 %         | 1,451        | 78.8 %         |
| Yes                                                                    | 11,919        | 43.2 %         | 6,029          | 59.3 %         | 3,117        | 44.4 %         | 634          | 17.9 %         | 1,264        | 60.3 %         | 125          | 11.4 %         | 286          | 27.0 %         | 73         | 9.6 %          | 391          | 21.2 %         |

44  
45  
46



|    |                                                                       |        |       |       |       |       |       |       |       |       |       |       |       |       |       |     |       |       |       |
|----|-----------------------------------------------------------------------|--------|-------|-------|-------|-------|-------|-------|-------|-------|-------|-------|-------|-------|-------|-----|-------|-------|-------|
| 1  | <b>Self-rated cognitive health</b>                                    |        |       |       |       |       |       |       |       |       |       |       |       |       |       |     |       |       |       |
| 2  | Below average                                                         | 1,661  | 6.0%  | 693   | 6.8%  | 406   | 5.8%  | 238   | 6.7%  | 91    | 4.3%  | 42    | 3.8%  | 32    | 3.0%  | 87  | 11.4% | 72    | 3.9%  |
| 3  | Average or above average                                              | 25,929 | 94.0% | 9,467 | 93.2% | 6,617 | 94.2% | 3,311 | 93.3% | 2,004 | 95.7% | 1,059 | 96.2% | 1,028 | 97.0% | 673 | 88.6% | 1,770 | 96.1% |
| 4  |                                                                       |        |       |       |       |       |       |       |       |       |       |       |       |       |       |     |       |       |       |
| 5  |                                                                       |        |       |       |       |       |       |       |       |       |       |       |       |       |       |     |       |       |       |
| 6  | <b>Self-rated mental health</b>                                       |        |       |       |       |       |       |       |       |       |       |       |       |       |       |     |       |       |       |
| 7  | Below average                                                         | 3,632  | 13.2% | 1,306 | 12.9% | 860   | 12.2% | 496   | 14.0% | 206   | 9.8%  | 130   | 11.8% | 169   | 15.9% | 182 | 23.9% | 283   | 15.4% |
| 8  | Average or above average                                              | 23,958 | 86.8% | 8,854 | 87.1% | 6,163 | 87.8% | 3,053 | 86.0% | 1,889 | 90.2% | 971   | 88.2% | 891   | 84.1% | 578 | 76.1% | 1,559 | 84.6% |
| 9  |                                                                       |        |       |       |       |       |       |       |       |       |       |       |       |       |       |     |       |       |       |
| 10 |                                                                       |        |       |       |       |       |       |       |       |       |       |       |       |       |       |     |       |       |       |
| 11 | <b>Experience of illness, disability or health problem</b>            |        |       |       |       |       |       |       |       |       |       |       |       |       |       |     |       |       |       |
| 12 | No                                                                    | 16,451 | 59.6% | 5,806 | 57.1% | 4,216 | 60.0% | 1,971 | 55.5% | 1,527 | 72.9% | 736   | 66.8% | 606   | 57.2% | 372 | 48.9% | 1,217 | 66.1% |
| 13 | Yes                                                                   | 11,139 | 40.4% | 4,354 | 42.9% | 2,807 | 40.0% | 1,578 | 44.5% | 568   | 27.1% | 365   | 33.2% | 454   | 42.8% | 388 | 51.1% | 625   | 33.9% |
| 14 |                                                                       |        |       |       |       |       |       |       |       |       |       |       |       |       |       |     |       |       |       |
| 15 |                                                                       |        |       |       |       |       |       |       |       |       |       |       |       |       |       |     |       |       |       |
| 16 | <b>Experience as caregiver of patient with brain disease</b>          |        |       |       |       |       |       |       |       |       |       |       |       |       |       |     |       |       |       |
| 17 | No                                                                    | 14,762 | 53.5% | 4,355 | 42.9% | 3,686 | 52.5% | 2,206 | 62.2% | 1,254 | 59.9% | 782   | 71.0% | 841   | 79.3% | 459 | 60.4% | 1,179 | 64.0% |
| 18 | Yes                                                                   | 12,828 | 46.5% | 5,805 | 57.1% | 3,337 | 47.5% | 1,343 | 37.8% | 841   | 40.1% | 319   | 29.0% | 219   | 20.7% | 301 | 39.6% | 663   | 36.0% |
| 19 |                                                                       |        |       |       |       |       |       |       |       |       |       |       |       |       |       |     |       |       |       |
| 20 |                                                                       |        |       |       |       |       |       |       |       |       |       |       |       |       |       |     |       |       |       |
| 21 |                                                                       |        |       |       |       |       |       |       |       |       |       |       |       |       |       |     |       |       |       |
| 22 |                                                                       |        |       |       |       |       |       |       |       |       |       |       |       |       |       |     |       |       |       |
| 23 | * Percentages add up to >100% because multiple responses were allowed |        |       |       |       |       |       |       |       |       |       |       |       |       |       |     |       |       |       |
| 24 |                                                                       |        |       |       |       |       |       |       |       |       |       |       |       |       |       |     |       |       |       |
| 25 |                                                                       |        |       |       |       |       |       |       |       |       |       |       |       |       |       |     |       |       |       |
| 26 |                                                                       |        |       |       |       |       |       |       |       |       |       |       |       |       |       |     |       |       |       |
| 27 |                                                                       |        |       |       |       |       |       |       |       |       |       |       |       |       |       |     |       |       |       |
| 28 |                                                                       |        |       |       |       |       |       |       |       |       |       |       |       |       |       |     |       |       |       |
| 29 |                                                                       |        |       |       |       |       |       |       |       |       |       |       |       |       |       |     |       |       |       |
| 30 |                                                                       |        |       |       |       |       |       |       |       |       |       |       |       |       |       |     |       |       |       |
| 31 |                                                                       |        |       |       |       |       |       |       |       |       |       |       |       |       |       |     |       |       |       |
| 32 |                                                                       |        |       |       |       |       |       |       |       |       |       |       |       |       |       |     |       |       |       |
| 33 |                                                                       |        |       |       |       |       |       |       |       |       |       |       |       |       |       |     |       |       |       |
| 34 |                                                                       |        |       |       |       |       |       |       |       |       |       |       |       |       |       |     |       |       |       |
| 35 |                                                                       |        |       |       |       |       |       |       |       |       |       |       |       |       |       |     |       |       |       |
| 36 |                                                                       |        |       |       |       |       |       |       |       |       |       |       |       |       |       |     |       |       |       |
| 37 |                                                                       |        |       |       |       |       |       |       |       |       |       |       |       |       |       |     |       |       |       |
| 38 |                                                                       |        |       |       |       |       |       |       |       |       |       |       |       |       |       |     |       |       |       |
| 39 |                                                                       |        |       |       |       |       |       |       |       |       |       |       |       |       |       |     |       |       |       |
| 40 |                                                                       |        |       |       |       |       |       |       |       |       |       |       |       |       |       |     |       |       |       |
| 41 |                                                                       |        |       |       |       |       |       |       |       |       |       |       |       |       |       |     |       |       |       |
| 42 |                                                                       |        |       |       |       |       |       |       |       |       |       |       |       |       |       |     |       |       |       |
| 43 |                                                                       |        |       |       |       |       |       |       |       |       |       |       |       |       |       |     |       |       |       |
| 44 |                                                                       |        |       |       |       |       |       |       |       |       |       |       |       |       |       |     |       |       |       |
| 45 |                                                                       |        |       |       |       |       |       |       |       |       |       |       |       |       |       |     |       |       |       |
| 46 |                                                                       |        |       |       |       |       |       |       |       |       |       |       |       |       |       |     |       |       |       |

# Lifebrain Global Brain Health Survey Supplementary material 3

## Odds ratios and 99% confidence intervals across all demographic characteristics

### Contents

|          |                                                                                                  |           |
|----------|--------------------------------------------------------------------------------------------------|-----------|
| <b>1</b> | <b>Question 1</b>                                                                                | <b>2</b>  |
| 1.1      | In your opinion, does <i>income</i> have an influence on brain health? . . . . .                 | 2         |
| 1.2      | In your opinion, does <i>profession</i> have an influence on brain health? . . . . .             | 3         |
| 1.3      | In your opinion, does <i>education</i> have an influence on brain health? . . . . .              | 4         |
| 1.4      | In your opinion, does <i>diet</i> have an influence on brain health? . . . . .                   | 5         |
| 1.5      | In your opinion, does <i>physical environment</i> have an influence on brain health? . . . . .   | 6         |
| 1.6      | In your opinion, does <i>life goals</i> have an influence on brain health? . . . . .             | 7         |
| 1.7      | In your opinion, does <i>social environment</i> have an influence on brain health? . . . . .     | 8         |
| 1.8      | In your opinion, does <i>sleeping habits</i> have an influence on brain health? . . . . .        | 9         |
| 1.9      | In your opinion, does <i>physical health</i> have an influence on brain health? . . . . .        | 10        |
| 1.10     | In your opinion, does <i>genetics</i> have an influence on brain health? . . . . .               | 11        |
| 1.11     | In your opinion, does <i>substance use</i> have an influence on brain health? . . . . .          | 12        |
| <b>2</b> | <b>Question 2</b>                                                                                | <b>13</b> |
| 2.1      | In your opinion, is it important to look after one's brain in <i>in the womb</i> ? . . . . .     | 13        |
| 2.2      | In your opinion, is it important to look after one's brain in <i>childhood</i> ? . . . . .       | 14        |
| 2.3      | In your opinion, is it important to look after one's brain in <i>adolescence</i> ? . . . . .     | 15        |
| 2.4      | In your opinion, is it important to look after one's brain in <i>young adulthood</i> ? . . . . . | 16        |
| 2.5      | In your opinion, is it important to look after one's brain in <i>middle age</i> ? . . . . .      | 17        |
| 2.6      | In your opinion, is it important to look after one's brain in <i>old age</i> ? . . . . .         | 18        |
| <b>3</b> | <b>Question 3</b>                                                                                | <b>19</b> |
| 3.1      | I associate <i>alzheimer's</i> with the brain. . . . .                                           | 19        |
| 3.2      | I associate <i>schizophrenia</i> with the brain. . . . .                                         | 20        |
| 3.3      | I associate <i>depression</i> with the brain. . . . .                                            | 21        |
| 3.4      | I associate <i>bipolar</i> with the brain. . . . .                                               | 22        |
| 3.5      | I associate <i>anxiety</i> with the brain. . . . .                                               | 23        |
| 3.6      | I associate <i>addiction</i> with the brain. . . . .                                             | 24        |
| 3.7      | I associate <i>stroke</i> with the brain. . . . .                                                | 25        |
| 3.8      | I associate <i>parkinson's</i> with the brain. . . . .                                           | 26        |
| 3.9      | I associate <i>migraine</i> with the brain. . . . .                                              | 27        |
| 3.10     | I associate <i>cancer</i> with the brain. . . . .                                                | 28        |
| 3.11     | I associate <i>hypertension</i> with the brain. . . . .                                          | 29        |
| 3.12     | I associate <i>diabetes</i> with the brain. . . . .                                              | 30        |
| 3.13     | I associate <i>arthritis</i> with the brain. . . . .                                             | 31        |

# 1 Question 1

## 1.1 In your opinion, does *income* have an influence on brain health?

Table 1: Q1 Income

| Variable/Subgroup                   | Descriptive   |        | Inferential |          |       |
|-------------------------------------|---------------|--------|-------------|----------|-------|
|                                     | Positive      | N      | OR          | CI (99%) |       |
|                                     |               |        |             | Lower    | Upper |
| <b>Age</b>                          |               |        |             |          |       |
| >= 61                               | 4 666 (36.8%) | 12 667 |             |          |       |
| <= 40                               | 1 434 (32.0%) | 4 482  | 0.81        | 0.73     | 0.89  |
| 41-60                               | 3 732 (36.3%) | 10 287 | 0.98        | 0.91     | 1.05  |
| <b>Education</b>                    |               |        |             |          |       |
| Higher                              | 6 607 (35.1%) | 18 834 |             |          |       |
| Lower                               | 3 225 (37.5%) | 8 602  | 1.11        | 1.04     | 1.19  |
| <b>Gender</b>                       |               |        |             |          |       |
| Woman                               | 7 061 (36.2%) | 19 527 |             |          |       |
| Man                                 | 2 720 (35.0%) | 7 782  | 0.95        | 0.88     | 1.02  |
| Other/Undisclosed                   | 51 (40.2%)    | 127    | 1.18        | 0.74     | 1.89  |
| <b>Healthcare Experience</b>        |               |        |             |          |       |
| No                                  | 5 641 (33.5%) | 16 855 |             |          |       |
| Yes                                 | 4 191 (39.6%) | 10 581 | 1.30        | 1.22     | 1.39  |
| <b>Cognitive Health</b>             |               |        |             |          |       |
| Average or above                    | 9 227 (35.8%) | 25 787 |             |          |       |
| Below average                       | 605 (36.7%)   | 1 649  | 1.04        | 0.91     | 1.19  |
| <b>Mental Health</b>                |               |        |             |          |       |
| Average or above                    | 8 535 (35.8%) | 23 822 |             |          |       |
| Below average                       | 1 297 (35.9%) | 3 614  | 1.00        | 0.91     | 1.10  |
| <b>Illness Experience</b>           |               |        |             |          |       |
| No                                  | 5 651 (34.5%) | 16 375 |             |          |       |
| Yes                                 | 4 181 (37.8%) | 11 061 | 1.15        | 1.08     | 1.23  |
| <b>Brain Disease Caregiver</b>      |               |        |             |          |       |
| No                                  | 5 199 (35.4%) | 14 682 |             |          |       |
| Yes                                 | 4 633 (36.3%) | 12 754 | 1.04        | 0.97     | 1.11  |
| <b>Brain Research Participation</b> |               |        |             |          |       |
| No                                  | 5 499 (35.3%) | 15 577 |             |          |       |
| Yes                                 | 4 333 (36.5%) | 11 859 | 1.06        | 0.99     | 1.13  |
| <b>Relationship</b>                 |               |        |             |          |       |
| Not stable                          | 4 335 (35.9%) | 12 091 |             |          |       |
| Stable                              | 5 497 (35.8%) | 15 345 | 1.00        | 0.94     | 1.07  |

1.2 In your opinion, does *profession* have an influence on brain health?

Table 2: Q1 Profession

| Variable/Subgroup                   | Descriptive    |        | Inferential |          |       |
|-------------------------------------|----------------|--------|-------------|----------|-------|
|                                     | Positive       | N      | OR          | CI (99%) |       |
|                                     |                |        |             | Lower    | Upper |
| <b>Age</b>                          |                |        |             |          |       |
| >= 61                               | 6 749 (53.2%)  | 12 675 |             |          |       |
| 41-60                               | 5 866 (57.0%)  | 10 300 | 1.16        | 1.08     | 1.24  |
| <= 40                               | 2 701 (60.2%)  | 4 484  | 1.33        | 1.21     | 1.46  |
| <b>Education</b>                    |                |        |             |          |       |
| Higher                              | 10 929 (58.0%) | 18 855 |             |          |       |
| Lower                               | 4 387 (51.0%)  | 8 604  | 0.75        | 0.71     | 0.81  |
| <b>Gender</b>                       |                |        |             |          |       |
| Woman                               | 10 675 (54.6%) | 19 542 |             |          |       |
| Other/Undisclosed                   | 69 (54.3%)     | 127    | 0.99        | 0.62     | 1.57  |
| Man                                 | 4 572 (58.7%)  | 7 790  | 1.18        | 1.10     | 1.27  |
| <b>Healthcare Experience</b>        |                |        |             |          |       |
| No                                  | 9 080 (53.9%)  | 16 861 |             |          |       |
| Yes                                 | 6 236 (58.8%)  | 10 598 | 1.23        | 1.15     | 1.31  |
| <b>Cognitive Health</b>             |                |        |             |          |       |
| Average or above                    | 14 473 (56.1%) | 25 810 |             |          |       |
| Below average                       | 843 (51.1%)    | 1 649  | 0.82        | 0.72     | 0.93  |
| <b>Mental Health</b>                |                |        |             |          |       |
| Average or above                    | 13 404 (56.2%) | 23 847 |             |          |       |
| Below average                       | 1 912 (52.9%)  | 3 612  | 0.88        | 0.80     | 0.96  |
| <b>Illness Experience</b>           |                |        |             |          |       |
| No                                  | 9 234 (56.4%)  | 16 383 |             |          |       |
| Yes                                 | 6 082 (54.9%)  | 11 076 | 0.94        | 0.88     | 1.01  |
| <b>Brain Disease Caregiver</b>      |                |        |             |          |       |
| No                                  | 8 392 (57.2%)  | 14 682 |             |          |       |
| Yes                                 | 6 924 (54.2%)  | 12 777 | 0.89        | 0.83     | 0.94  |
| <b>Brain Research Participation</b> |                |        |             |          |       |
| No                                  | 8 931 (57.3%)  | 15 590 |             |          |       |
| Yes                                 | 6 385 (53.8%)  | 11 869 | 0.87        | 0.81     | 0.92  |
| <b>Relationship</b>                 |                |        |             |          |       |
| Not stable                          | 6 788 (56.1%)  | 12 107 |             |          |       |
| Stable                              | 8 528 (55.5%)  | 15 352 | 0.98        | 0.92     | 1.04  |

1.3 In your opinion, does *education* have an influence on brain health?

Table 3: Q1 Education

| Variable/Subgroup                   | Descriptive    |        | Inferential |          |       |
|-------------------------------------|----------------|--------|-------------|----------|-------|
|                                     | Positive       | N      | OR          | CI (99%) |       |
|                                     |                |        |             | Lower    | Upper |
| <b>Age</b>                          |                |        |             |          |       |
| >= 61                               | 7 722 (60.9%)  | 12 685 |             |          |       |
| 41-60                               | 6 099 (59.2%)  | 10 301 | 0.93        | 0.87     | 1.00  |
| <= 40                               | 2 844 (63.4%)  | 4 487  | 1.11        | 1.01     | 1.22  |
| <b>Education</b>                    |                |        |             |          |       |
| Higher                              | 12 134 (64.3%) | 18 865 |             |          |       |
| Lower                               | 4 531 (52.6%)  | 8 608  | 0.62        | 0.58     | 0.66  |
| <b>Gender</b>                       |                |        |             |          |       |
| Woman                               | 11 695 (59.8%) | 19 550 |             |          |       |
| Man                                 | 4 888 (62.7%)  | 7 796  | 1.13        | 1.05     | 1.21  |
| Other/Undisclosed                   | 82 (64.6%)     | 127    | 1.22        | 0.76     | 1.98  |
| <b>Healthcare Experience</b>        |                |        |             |          |       |
| No                                  | 9 790 (58.0%)  | 16 870 |             |          |       |
| Yes                                 | 6 875 (64.8%)  | 10 603 | 1.33        | 1.25     | 1.42  |
| <b>Cognitive Health</b>             |                |        |             |          |       |
| Average or above                    | 15 811 (61.2%) | 25 824 |             |          |       |
| Below average                       | 854 (51.8%)    | 1 649  | 0.68        | 0.60     | 0.78  |
| <b>Mental Health</b>                |                |        |             |          |       |
| Average or above                    | 14 720 (61.7%) | 23 857 |             |          |       |
| Below average                       | 1 945 (53.8%)  | 3 616  | 0.72        | 0.66     | 0.79  |
| <b>Illness Experience</b>           |                |        |             |          |       |
| No                                  | 10 103 (61.6%) | 16 391 |             |          |       |
| Yes                                 | 6 562 (59.2%)  | 11 082 | 0.90        | 0.85     | 0.96  |
| <b>Brain Disease Caregiver</b>      |                |        |             |          |       |
| No                                  | 9 053 (61.6%)  | 14 698 |             |          |       |
| Yes                                 | 7 612 (59.6%)  | 12 775 | 0.92        | 0.86     | 0.98  |
| <b>Brain Research Participation</b> |                |        |             |          |       |
| No                                  | 9 493 (60.8%)  | 15 609 |             |          |       |
| Yes                                 | 7 172 (60.5%)  | 11 864 | 0.98        | 0.92     | 1.05  |
| <b>Relationship</b>                 |                |        |             |          |       |
| Not stable                          | 7 307 (60.3%)  | 12 114 |             |          |       |
| Stable                              | 9 358 (60.9%)  | 15 359 | 1.03        | 0.96     | 1.09  |

1.4 In your opinion, does *diet* have an influence on brain health?

Table 4: Q1 Diet

| Variable/Subgroup                   | Descriptive    |        | Inferential |          |       |
|-------------------------------------|----------------|--------|-------------|----------|-------|
|                                     | Positive       | N      | OR          | CI (99%) |       |
|                                     |                |        |             | Lower    | Upper |
| <b>Age</b>                          |                |        |             |          |       |
| >= 61                               | 8 411 (66.7%)  | 12 611 |             |          |       |
| 41-60                               | 7 759 (75.6%)  | 10 270 | 1.54        | 1.43     | 1.67  |
| <= 40                               | 3 413 (76.1%)  | 4 482  | 1.59        | 1.44     | 1.77  |
| <b>Education</b>                    |                |        |             |          |       |
| Higher                              | 13 742 (73.1%) | 18 793 |             |          |       |
| Lower                               | 5 841 (68.2%)  | 8 570  | 0.79        | 0.73     | 0.85  |
| <b>Gender</b>                       |                |        |             |          |       |
| Woman                               | 14 352 (73.7%) | 19 471 |             |          |       |
| Man                                 | 5 139 (66.2%)  | 7 765  | 0.70        | 0.65     | 0.75  |
| Other/Undisclosed                   | 92 (72.4%)     | 127    | 0.94        | 0.56     | 1.57  |
| <b>Healthcare Experience</b>        |                |        |             |          |       |
| No                                  | 11 604 (69.0%) | 16 809 |             |          |       |
| Yes                                 | 7 979 (75.6%)  | 10 554 | 1.39        | 1.29     | 1.49  |
| <b>Cognitive Health</b>             |                |        |             |          |       |
| Average or above                    | 18 564 (72.2%) | 25 723 |             |          |       |
| Below average                       | 1 019 (62.1%)  | 1 640  | 0.63        | 0.55     | 0.73  |
| <b>Mental Health</b>                |                |        |             |          |       |
| Average or above                    | 17 170 (72.3%) | 23 752 |             |          |       |
| Below average                       | 2 413 (66.8%)  | 3 611  | 0.77        | 0.70     | 0.85  |
| <b>Illness Experience</b>           |                |        |             |          |       |
| No                                  | 11 860 (72.6%) | 16 328 |             |          |       |
| Yes                                 | 7 723 (70.0%)  | 11 035 | 0.88        | 0.82     | 0.94  |
| <b>Brain Disease Caregiver</b>      |                |        |             |          |       |
| No                                  | 10 236 (70.0%) | 14 630 |             |          |       |
| Yes                                 | 9 347 (73.4%)  | 12 733 | 1.18        | 1.11     | 1.27  |
| <b>Brain Research Participation</b> |                |        |             |          |       |
| No                                  | 11 067 (71.2%) | 15 546 |             |          |       |
| Yes                                 | 8 516 (72.1%)  | 11 817 | 1.04        | 0.97     | 1.12  |
| <b>Relationship</b>                 |                |        |             |          |       |
| Not stable                          | 8 697 (72.0%)  | 12 079 |             |          |       |
| Stable                              | 10 886 (71.2%) | 15 284 | 0.96        | 0.90     | 1.03  |

## 1.5 In your opinion, does *physical environment* have an influence on brain health?

Table 5: Q1 Physical environment

| Variable/Subgroup                   | Descriptive    |        | Inferential |          |       |
|-------------------------------------|----------------|--------|-------------|----------|-------|
|                                     | Positive       | N      | OR          | CI (99%) |       |
|                                     |                |        |             | Lower    | Upper |
| <b>Age</b>                          |                |        |             |          |       |
| >= 61                               | 8 836 (69.8%)  | 12 656 |             |          |       |
| <= 40                               | 3 214 (71.7%)  | 4 480  | 1.10        | 0.99     | 1.21  |
| 41-60                               | 7 655 (74.3%)  | 10 296 | 1.25        | 1.16     | 1.35  |
| <b>Education</b>                    |                |        |             |          |       |
| Higher                              | 13 466 (71.5%) | 18 838 |             |          |       |
| Lower                               | 6 239 (72.6%)  | 8 594  | 1.06        | 0.98     | 1.14  |
| <b>Gender</b>                       |                |        |             |          |       |
| Woman                               | 14 191 (72.7%) | 19 522 |             |          |       |
| Man                                 | 5 416 (69.6%)  | 7 784  | 0.86        | 0.80     | 0.93  |
| Other/Undisclosed                   | 98 (77.8%)     | 126    | 1.31        | 0.76     | 2.29  |
| <b>Healthcare Experience</b>        |                |        |             |          |       |
| No                                  | 11 879 (70.5%) | 16 854 |             |          |       |
| Yes                                 | 7 826 (74.0%)  | 10 578 | 1.19        | 1.11     | 1.28  |
| <b>Cognitive Health</b>             |                |        |             |          |       |
| Average or above                    | 18 601 (72.1%) | 25 791 |             |          |       |
| Below average                       | 1 104 (67.3%)  | 1 641  | 0.79        | 0.69     | 0.91  |
| <b>Mental Health</b>                |                |        |             |          |       |
| Average or above                    | 17 171 (72.1%) | 23 824 |             |          |       |
| Below average                       | 2 534 (70.2%)  | 3 608  | 0.91        | 0.83     | 1.01  |
| <b>Illness Experience</b>           |                |        |             |          |       |
| No                                  | 11 585 (70.7%) | 16 376 |             |          |       |
| Yes                                 | 8 120 (73.4%)  | 11 056 | 1.14        | 1.07     | 1.23  |
| <b>Brain Disease Caregiver</b>      |                |        |             |          |       |
| No                                  | 10 490 (71.5%) | 14 668 |             |          |       |
| Yes                                 | 9 215 (72.2%)  | 12 764 | 1.03        | 0.96     | 1.11  |
| <b>Brain Research Participation</b> |                |        |             |          |       |
| No                                  | 11 164 (71.7%) | 15 575 |             |          |       |
| Yes                                 | 8 541 (72.0%)  | 11 857 | 1.02        | 0.95     | 1.09  |
| <b>Relationship</b>                 |                |        |             |          |       |
| Not stable                          | 8 779 (72.6%)  | 12 095 |             |          |       |
| Stable                              | 10 926 (71.2%) | 15 337 | 0.94        | 0.87     | 1.00  |

1.6 In your opinion, does *life goals* have an influence on brain health?

Table 6: Q1 Life goals

| Variable/Subgroup                   | Descriptive    |        | Inferential |          |       |
|-------------------------------------|----------------|--------|-------------|----------|-------|
|                                     | Positive       | N      | OR          | CI (99%) |       |
|                                     |                |        |             | Lower    | Upper |
| <b>Age</b>                          |                |        |             |          |       |
| >= 61                               | 9 441 (74.3%)  | 12 706 |             |          |       |
| <= 40                               | 3 017 (67.2%)  | 4 488  | 0.71        | 0.64     | 0.78  |
| 41-60                               | 7 551 (73.3%)  | 10 302 | 0.95        | 0.88     | 1.03  |
| <b>Education</b>                    |                |        |             |          |       |
| Higher                              | 13 811 (73.2%) | 18 875 |             |          |       |
| Lower                               | 6 198 (71.9%)  | 8 621  | 0.94        | 0.87     | 1.01  |
| <b>Gender</b>                       |                |        |             |          |       |
| Woman                               | 14 370 (73.5%) | 19 562 |             |          |       |
| Other/Undisclosed                   | 90 (70.9%)     | 127    | 0.88        | 0.53     | 1.46  |
| Man                                 | 5 549 (71.1%)  | 7 807  | 0.89        | 0.82     | 0.96  |
| <b>Healthcare Experience</b>        |                |        |             |          |       |
| No                                  | 11 978 (70.9%) | 16 888 |             |          |       |
| Yes                                 | 8 031 (75.7%)  | 10 608 | 1.28        | 1.19     | 1.37  |
| <b>Cognitive Health</b>             |                |        |             |          |       |
| Average or above                    | 18 839 (72.9%) | 25 846 |             |          |       |
| Below average                       | 1 170 (70.9%)  | 1 650  | 0.91        | 0.78     | 1.05  |
| <b>Mental Health</b>                |                |        |             |          |       |
| Average or above                    | 17 521 (73.4%) | 23 880 |             |          |       |
| Below average                       | 2 488 (68.8%)  | 3 616  | 0.80        | 0.72     | 0.88  |
| <b>Illness Experience</b>           |                |        |             |          |       |
| No                                  | 11 891 (72.5%) | 16 396 |             |          |       |
| Yes                                 | 8 118 (73.1%)  | 11 100 | 1.03        | 0.96     | 1.11  |
| <b>Brain Disease Caregiver</b>      |                |        |             |          |       |
| No                                  | 10 756 (73.1%) | 14 708 |             |          |       |
| Yes                                 | 9 253 (72.4%)  | 12 788 | 0.96        | 0.90     | 1.03  |
| <b>Brain Research Participation</b> |                |        |             |          |       |
| No                                  | 11 550 (74.0%) | 15 611 |             |          |       |
| Yes                                 | 8 459 (71.2%)  | 11 885 | 0.87        | 0.81     | 0.93  |
| <b>Relationship</b>                 |                |        |             |          |       |
| Not stable                          | 8 804 (72.6%)  | 12 121 |             |          |       |
| Stable                              | 11 205 (72.9%) | 15 375 | 1.01        | 0.94     | 1.09  |



1.7 In your opinion, does *social environment* have an influence on brain health?

Table 7: Q1 Social environment

| Variable/Subgroup                   | Descriptive    |        | Inferential |          |       |
|-------------------------------------|----------------|--------|-------------|----------|-------|
|                                     | Positive       | N      | OR          | CI (99%) |       |
|                                     |                |        |             | Lower    | Upper |
| <b>Age</b>                          |                |        |             |          |       |
| >= 61                               | 10 148 (79.9%) | 12 694 |             |          |       |
| 41-60                               | 8 671 (84.1%)  | 10 306 | 1.33        | 1.22     | 1.46  |
| <= 40                               | 3 919 (87.3%)  | 4 488  | 1.73        | 1.52     | 1.97  |
| <b>Education</b>                    |                |        |             |          |       |
| Higher                              | 15 768 (83.6%) | 18 870 |             |          |       |
| Lower                               | 6 970 (80.9%)  | 8 618  | 0.83        | 0.76     | 0.91  |
| <b>Gender</b>                       |                |        |             |          |       |
| Woman                               | 16 441 (84.1%) | 19 559 |             |          |       |
| Man                                 | 6 184 (79.2%)  | 7 804  | 0.72        | 0.66     | 0.79  |
| Other/Undisclosed                   | 113 (90.4%)    | 125    | 1.79        | 0.81     | 3.91  |
| <b>Healthcare Experience</b>        |                |        |             |          |       |
| No                                  | 13 615 (80.6%) | 16 887 |             |          |       |
| Yes                                 | 9 123 (86.1%)  | 10 601 | 1.48        | 1.36     | 1.62  |
| <b>Cognitive Health</b>             |                |        |             |          |       |
| Average or above                    | 21 472 (83.1%) | 25 835 |             |          |       |
| Below average                       | 1 266 (76.6%)  | 1 653  | 0.66        | 0.57     | 0.78  |
| <b>Mental Health</b>                |                |        |             |          |       |
| Average or above                    | 19 732 (82.7%) | 23 870 |             |          |       |
| Below average                       | 3 006 (83.1%)  | 3 618  | 1.03        | 0.91     | 1.16  |
| <b>Illness Experience</b>           |                |        |             |          |       |
| No                                  | 13 612 (83.0%) | 16 398 |             |          |       |
| Yes                                 | 9 126 (82.3%)  | 11 090 | 0.95        | 0.87     | 1.03  |
| <b>Brain Disease Caregiver</b>      |                |        |             |          |       |
| No                                  | 12 120 (82.4%) | 14 705 |             |          |       |
| Yes                                 | 10 618 (83.1%) | 12 783 | 1.05        | 0.96     | 1.14  |
| <b>Brain Research Participation</b> |                |        |             |          |       |
| No                                  | 12 983 (83.2%) | 15 608 |             |          |       |
| Yes                                 | 9 755 (82.1%)  | 11 880 | 0.93        | 0.85     | 1.01  |
| <b>Relationship</b>                 |                |        |             |          |       |
| Not stable                          | 10 054 (82.9%) | 12 122 |             |          |       |
| Stable                              | 12 684 (82.5%) | 15 366 | 0.97        | 0.90     | 1.06  |

1.8 In your opinion, does *sleeping habits* have an influence on brain health?

Table 8: Q1 Sleeping habits

| Variable/Subgroup                   | Descriptive    |        | Inferential |          |       |
|-------------------------------------|----------------|--------|-------------|----------|-------|
|                                     | Positive       | N      | OR          | CI (99%) |       |
|                                     |                |        |             | Lower    | Upper |
| <b>Age</b>                          |                |        |             |          |       |
| >= 61                               | 10 097 (79.6%) | 12 685 |             |          |       |
| 41-60                               | 9 166 (89.0%)  | 10 304 | 2.06        | 1.87     | 2.28  |
| <= 40                               | 4 109 (91.6%)  | 4 488  | 2.78        | 2.39     | 3.23  |
| <b>Education</b>                    |                |        |             |          |       |
| Higher                              | 16 185 (85.8%) | 18 863 |             |          |       |
| Lower                               | 7 187 (83.4%)  | 8 614  | 0.83        | 0.76     | 0.91  |
| <b>Gender</b>                       |                |        |             |          |       |
| Woman                               | 16 921 (86.5%) | 19 554 |             |          |       |
| Man                                 | 6 340 (81.3%)  | 7 796  | 0.68        | 0.62     | 0.74  |
| Other/Undisclosed                   | 111 (87.4%)    | 127    | 1.08        | 0.54     | 2.16  |
| <b>Healthcare Experience</b>        |                |        |             |          |       |
| No                                  | 14 112 (83.6%) | 16 874 |             |          |       |
| Yes                                 | 9 260 (87.3%)  | 10 603 | 1.35        | 1.23     | 1.48  |
| <b>Cognitive Health</b>             |                |        |             |          |       |
| Average or above                    | 21 983 (85.1%) | 25 824 |             |          |       |
| Below average                       | 1 389 (84.0%)  | 1 653  | 0.92        | 0.77     | 1.10  |
| <b>Mental Health</b>                |                |        |             |          |       |
| Average or above                    | 20 187 (84.6%) | 23 857 |             |          |       |
| Below average                       | 3 185 (88.0%)  | 3 620  | 1.33        | 1.16     | 1.53  |
| <b>Illness Experience</b>           |                |        |             |          |       |
| No                                  | 13 838 (84.5%) | 16 384 |             |          |       |
| Yes                                 | 9 534 (85.9%)  | 11 093 | 1.13        | 1.03     | 1.23  |
| <b>Brain Disease Caregiver</b>      |                |        |             |          |       |
| No                                  | 12 549 (85.4%) | 14 695 |             |          |       |
| Yes                                 | 10 823 (84.7%) | 12 782 | 0.94        | 0.87     | 1.03  |
| <b>Brain Research Participation</b> |                |        |             |          |       |
| No                                  | 13 571 (86.9%) | 15 608 |             |          |       |
| Yes                                 | 9 801 (82.6%)  | 11 869 | 0.71        | 0.65     | 0.78  |
| <b>Relationship</b>                 |                |        |             |          |       |
| Not stable                          | 10 479 (86.5%) | 12 112 |             |          |       |
| Stable                              | 12 893 (83.9%) | 15 365 | 0.81        | 0.74     | 0.89  |

1.9 In your opinion, does *physical health* have an influence on brain health?

Table 9: Q1 Physical health

| Variable/Subgroup                   | Descriptive    |        | Inferential |          |       |
|-------------------------------------|----------------|--------|-------------|----------|-------|
|                                     | Positive       | N      | OR          | CI (99%) |       |
|                                     |                |        |             | Lower    | Upper |
| <b>Age</b>                          |                |        |             |          |       |
| >= 61                               | 10 976 (86.6%) | 12 671 |             |          |       |
| 41-60                               | 9 068 (88.1%)  | 10 296 | 1.14        | 1.03     | 1.26  |
| <= 40                               | 3 961 (88.4%)  | 4 483  | 1.17        | 1.02     | 1.34  |
| <b>Education</b>                    |                |        |             |          |       |
| Higher                              | 16 697 (88.6%) | 18 851 |             |          |       |
| Lower                               | 7 308 (85.0%)  | 8 599  | 0.73        | 0.66     | 0.81  |
| <b>Gender</b>                       |                |        |             |          |       |
| Woman                               | 17 244 (88.3%) | 19 525 |             |          |       |
| Other/Undisclosed                   | 108 (85.0%)    | 127    | 0.75        | 0.39     | 1.43  |
| Man                                 | 6 653 (85.3%)  | 7 798  | 0.77        | 0.70     | 0.85  |
| <b>Healthcare Experience</b>        |                |        |             |          |       |
| No                                  | 14 454 (85.7%) | 16 862 |             |          |       |
| Yes                                 | 9 551 (90.2%)  | 10 588 | 1.53        | 1.39     | 1.70  |
| <b>Cognitive Health</b>             |                |        |             |          |       |
| Average or above                    | 22 682 (87.9%) | 25 802 |             |          |       |
| Below average                       | 1 323 (80.3%)  | 1 648  | 0.56        | 0.47     | 0.66  |
| <b>Mental Health</b>                |                |        |             |          |       |
| Average or above                    | 20 948 (87.9%) | 23 830 |             |          |       |
| Below average                       | 3 057 (84.4%)  | 3 620  | 0.75        | 0.66     | 0.85  |
| <b>Illness Experience</b>           |                |        |             |          |       |
| No                                  | 14 462 (88.3%) | 16 375 |             |          |       |
| Yes                                 | 9 543 (86.2%)  | 11 075 | 0.82        | 0.75     | 0.91  |
| <b>Brain Disease Caregiver</b>      |                |        |             |          |       |
| No                                  | 12 764 (86.9%) | 14 682 |             |          |       |
| Yes                                 | 11 241 (88.0%) | 12 768 | 1.11        | 1.01     | 1.22  |
| <b>Brain Research Participation</b> |                |        |             |          |       |
| No                                  | 13 592 (87.2%) | 15 588 |             |          |       |
| Yes                                 | 10 413 (87.8%) | 11 862 | 1.06        | 0.96     | 1.16  |
| <b>Relationship</b>                 |                |        |             |          |       |
| Not stable                          | 10 540 (87.0%) | 12 110 |             |          |       |
| Stable                              | 13 465 (87.8%) | 15 340 | 1.07        | 0.97     | 1.18  |

1.10 In your opinion, does *genetics* have an influence on brain health?

Table 10: Q1 Genetics

| Variable/Subgroup                   | Descriptive    |        | Inferential |          |       |
|-------------------------------------|----------------|--------|-------------|----------|-------|
|                                     | Positive       | N      | OR          | CI (99%) |       |
|                                     |                |        |             | Lower    | Upper |
| <b>Age</b>                          |                |        |             |          |       |
| >= 61                               | 10 588 (83.4%) | 12 689 |             |          |       |
| <= 40                               | 3 435 (76.6%)  | 4 487  | 0.65        | 0.58     | 0.72  |
| 41-60                               | 8 610 (83.6%)  | 10 302 | 1.01        | 0.92     | 1.11  |
| <b>Education</b>                    |                |        |             |          |       |
| Higher                              | 15 586 (82.6%) | 18 863 |             |          |       |
| Lower                               | 7 047 (81.8%)  | 8 615  | 0.94        | 0.87     | 1.03  |
| <b>Gender</b>                       |                |        |             |          |       |
| Woman                               | 16 311 (83.4%) | 19 556 |             |          |       |
| Other/Undisclosed                   | 88 (69.8%)     | 126    | 0.46        | 0.28     | 0.76  |
| Man                                 | 6 234 (80.0%)  | 7 796  | 0.79        | 0.73     | 0.87  |
| <b>Healthcare Experience</b>        |                |        |             |          |       |
| No                                  | 13 797 (81.7%) | 16 882 |             |          |       |
| Yes                                 | 8 836 (83.4%)  | 10 596 | 1.12        | 1.03     | 1.22  |
| <b>Cognitive Health</b>             |                |        |             |          |       |
| Average or above                    | 21 319 (82.5%) | 25 829 |             |          |       |
| Below average                       | 1 314 (79.7%)  | 1 649  | 0.83        | 0.70     | 0.98  |
| <b>Mental Health</b>                |                |        |             |          |       |
| Average or above                    | 19 648 (82.3%) | 23 861 |             |          |       |
| Below average                       | 2 985 (82.5%)  | 3 617  | 1.01        | 0.90     | 1.14  |
| <b>Illness Experience</b>           |                |        |             |          |       |
| No                                  | 13 446 (82.0%) | 16 390 |             |          |       |
| Yes                                 | 9 187 (82.9%)  | 11 088 | 1.06        | 0.97     | 1.15  |
| <b>Brain Disease Caregiver</b>      |                |        |             |          |       |
| No                                  | 11 717 (79.7%) | 14 693 |             |          |       |
| Yes                                 | 10 916 (85.4%) | 12 785 | 1.48        | 1.36     | 1.61  |
| <b>Brain Research Participation</b> |                |        |             |          |       |
| No                                  | 12 644 (81.0%) | 15 605 |             |          |       |
| Yes                                 | 9 989 (84.1%)  | 11 873 | 1.24        | 1.14     | 1.35  |
| <b>Relationship</b>                 |                |        |             |          |       |
| Not stable                          | 9 796 (80.9%)  | 12 115 |             |          |       |
| Stable                              | 12 837 (83.6%) | 15 363 | 1.20        | 1.11     | 1.31  |

1.11 In your opinion, does *substance use* have an influence on brain health?

Table 11: Q1 Substance use

| Variable/Subgroup                   | Descriptive    |        | Inferential |          |       |
|-------------------------------------|----------------|--------|-------------|----------|-------|
|                                     | Positive       | N      | OR          | CI (99%) |       |
|                                     |                |        |             | Lower    | Upper |
| <b>Age</b>                          |                |        |             |          |       |
| >= 61                               | 11 491 (90.5%) | 12 692 |             |          |       |
| <= 40                               | 4 179 (93.2%)  | 4 485  | 1.43        | 1.20     | 1.69  |
| 41-60                               | 9 712 (94.2%)  | 10 308 | 1.70        | 1.49     | 1.95  |
| <b>Education</b>                    |                |        |             |          |       |
| Higher                              | 17 546 (93.0%) | 18 866 |             |          |       |
| Lower                               | 7 836 (90.9%)  | 8 619  | 0.75        | 0.67     | 0.85  |
| <b>Gender</b>                       |                |        |             |          |       |
| Woman                               | 18 238 (93.3%) | 19 551 |             |          |       |
| Other/Undisclosed                   | 109 (85.8%)    | 127    | 0.44        | 0.23     | 0.84  |
| Man                                 | 7 035 (90.1%)  | 7 807  | 0.66        | 0.58     | 0.74  |
| <b>Healthcare Experience</b>        |                |        |             |          |       |
| No                                  | 15 416 (91.3%) | 16 886 |             |          |       |
| Yes                                 | 9 966 (94.0%)  | 10 599 | 1.50        | 1.32     | 1.70  |
| <b>Cognitive Health</b>             |                |        |             |          |       |
| Average or above                    | 23 942 (92.7%) | 25 832 |             |          |       |
| Below average                       | 1 440 (87.1%)  | 1 653  | 0.53        | 0.44     | 0.65  |
| <b>Mental Health</b>                |                |        |             |          |       |
| Average or above                    | 22 069 (92.5%) | 23 866 |             |          |       |
| Below average                       | 3 313 (91.5%)  | 3 619  | 0.88        | 0.75     | 1.04  |
| <b>Illness Experience</b>           |                |        |             |          |       |
| No                                  | 15 240 (93.0%) | 16 395 |             |          |       |
| Yes                                 | 10 142 (91.5%) | 11 090 | 0.81        | 0.72     | 0.91  |
| <b>Brain Disease Caregiver</b>      |                |        |             |          |       |
| No                                  | 13 525 (92.0%) | 14 709 |             |          |       |
| Yes                                 | 11 857 (92.8%) | 12 776 | 1.13        | 1.00     | 1.27  |
| <b>Brain Research Participation</b> |                |        |             |          |       |
| No                                  | 14 422 (92.3%) | 15 619 |             |          |       |
| Yes                                 | 10 960 (92.4%) | 11 866 | 1.00        | 0.89     | 1.13  |
| <b>Relationship</b>                 |                |        |             |          |       |
| Not stable                          | 11 151 (92.0%) | 12 117 |             |          |       |
| Stable                              | 14 231 (92.6%) | 15 368 | 1.08        | 0.96     | 1.22  |

## 2 Question 2

### 2.1 In your opinion, is it important to look after one's brain in *in the womb*?

Table 12: Q2 In the womb

| Variable/Subgroup                   | Descriptive    |        | Inferential |          |       |
|-------------------------------------|----------------|--------|-------------|----------|-------|
|                                     | Positive       | N      | OR          | CI (99%) |       |
|                                     |                |        |             | Lower    | Upper |
| <b>Age</b>                          |                |        |             |          |       |
| >= 61                               | 10 109 (80.7%) | 12 520 |             |          |       |
| <= 40                               | 3 851 (86.1%)  | 4 471  | 1.48        | 1.31     | 1.68  |
| 41-60                               | 8 852 (86.2%)  | 10 268 | 1.49        | 1.36     | 1.64  |
| <b>Education</b>                    |                |        |             |          |       |
| Higher                              | 16 121 (86.0%) | 18 739 |             |          |       |
| Lower                               | 6 691 (78.5%)  | 8 520  | 0.59        | 0.54     | 0.65  |
| <b>Gender</b>                       |                |        |             |          |       |
| Woman                               | 16 698 (85.9%) | 19 433 |             |          |       |
| Man                                 | 6 006 (78.0%)  | 7 701  | 0.58        | 0.53     | 0.63  |
| Other/Undisclosed                   | 108 (86.4%)    | 125    | 1.04        | 0.53     | 2.04  |
| <b>Healthcare Experience</b>        |                |        |             |          |       |
| No                                  | 13 464 (80.5%) | 16 727 |             |          |       |
| Yes                                 | 9 348 (88.8%)  | 10 532 | 1.91        | 1.74     | 2.10  |
| <b>Cognitive Health</b>             |                |        |             |          |       |
| Average or above                    | 21 570 (84.2%) | 25 627 |             |          |       |
| Below average                       | 1 242 (76.1%)  | 1 632  | 0.60        | 0.51     | 0.70  |
| <b>Mental Health</b>                |                |        |             |          |       |
| Average or above                    | 19 867 (83.9%) | 23 666 |             |          |       |
| Below average                       | 2 945 (82.0%)  | 3 593  | 0.87        | 0.77     | 0.98  |
| <b>Illness Experience</b>           |                |        |             |          |       |
| No                                  | 13 636 (83.8%) | 16 271 |             |          |       |
| Yes                                 | 9 176 (83.5%)  | 10 988 | 0.98        | 0.90     | 1.07  |
| <b>Brain Disease Caregiver</b>      |                |        |             |          |       |
| No                                  | 11 975 (82.1%) | 14 577 |             |          |       |
| Yes                                 | 10 837 (85.5%) | 12 682 | 1.28        | 1.17     | 1.39  |
| <b>Brain Research Participation</b> |                |        |             |          |       |
| No                                  | 12 988 (83.9%) | 15 482 |             |          |       |
| Yes                                 | 9 824 (83.4%)  | 11 777 | 0.97        | 0.89     | 1.05  |
| <b>Relationship</b>                 |                |        |             |          |       |
| Not stable                          | 10 008 (83.2%) | 12 027 |             |          |       |
| Stable                              | 12 804 (84.1%) | 15 232 | 1.06        | 0.98     | 1.16  |

## 2.2 In your opinion, is it important to look after one's brain in *childhood*?

Table 13: Q2 Childhood

| Variable/Subgroup                   | Descriptive    |        | Inferential |          |       |
|-------------------------------------|----------------|--------|-------------|----------|-------|
|                                     | Positive       | N      | OR          | CI (99%) |       |
|                                     |                |        |             | Lower    | Upper |
| <b>Age</b>                          |                |        |             |          |       |
| >= 61                               | 11 791 (93.4%) | 12 626 |             |          |       |
| 41-60                               | 9 902 (96.2%)  | 10 297 | 1.78        | 1.51     | 2.09  |
| <= 40                               | 4 322 (96.4%)  | 4 484  | 1.89        | 1.51     | 2.37  |
| <b>Education</b>                    |                |        |             |          |       |
| Higher                              | 18 042 (95.8%) | 18 828 |             |          |       |
| Lower                               | 7 973 (92.9%)  | 8 579  | 0.57        | 0.50     | 0.66  |
| <b>Gender</b>                       |                |        |             |          |       |
| Woman                               | 18 679 (95.7%) | 19 518 |             |          |       |
| Man                                 | 7 217 (93.0%)  | 7 764  | 0.59        | 0.51     | 0.69  |
| Other/Undisclosed                   | 119 (95.2%)    | 125    | 0.89        | 0.30     | 2.63  |
| <b>Healthcare Experience</b>        |                |        |             |          |       |
| No                                  | 15 773 (93.7%) | 16 831 |             |          |       |
| Yes                                 | 10 242 (96.8%) | 10 576 | 2.06        | 1.74     | 2.43  |
| <b>Cognitive Health</b>             |                |        |             |          |       |
| Average or above                    | 24 506 (95.1%) | 25 760 |             |          |       |
| Below average                       | 1 509 (91.6%)  | 1 647  | 0.56        | 0.44     | 0.71  |
| <b>Mental Health</b>                |                |        |             |          |       |
| Average or above                    | 22 594 (94.9%) | 23 797 |             |          |       |
| Below average                       | 3 421 (94.8%)  | 3 610  | 0.96        | 0.78     | 1.19  |
| <b>Illness Experience</b>           |                |        |             |          |       |
| No                                  | 15 544 (95.1%) | 16 348 |             |          |       |
| Yes                                 | 10 471 (94.7%) | 11 059 | 0.92        | 0.80     | 1.06  |
| <b>Brain Disease Caregiver</b>      |                |        |             |          |       |
| No                                  | 13 912 (94.9%) | 14 662 |             |          |       |
| Yes                                 | 12 103 (95.0%) | 12 745 | 1.02        | 0.88     | 1.17  |
| <b>Brain Research Participation</b> |                |        |             |          |       |
| No                                  | 14 798 (95.1%) | 15 565 |             |          |       |
| Yes                                 | 11 217 (94.7%) | 11 842 | 0.93        | 0.81     | 1.07  |
| <b>Relationship</b>                 |                |        |             |          |       |
| Not stable                          | 11 503 (95.2%) | 12 085 |             |          |       |
| Stable                              | 14 512 (94.7%) | 15 322 | 0.91        | 0.79     | 1.05  |

## 2.3 In your opinion, is it important to look after one's brain in *adolescence*?

Table 14: Q2 Adolescence

| Variable/Subgroup                   | Descriptive    |        | Inferential |          |       |
|-------------------------------------|----------------|--------|-------------|----------|-------|
|                                     | Positive       | N      | OR          | CI (99%) |       |
|                                     |                |        |             | Lower    | Upper |
| <b>Age</b>                          |                |        |             |          |       |
| >= 61                               | 12 074 (95.5%) | 12 639 |             |          |       |
| 41-60                               | 10 019 (97.3%) | 10 293 | 1.71        | 1.41     | 2.08  |
| <= 40                               | 4 383 (97.9%)  | 4 479  | 2.14        | 1.60     | 2.85  |
| <b>Education</b>                    |                |        |             |          |       |
| Higher                              | 18 268 (97.0%) | 18 827 |             |          |       |
| Lower                               | 8 208 (95.6%)  | 8 584  | 0.67        | 0.56     | 0.80  |
| <b>Gender</b>                       |                |        |             |          |       |
| Woman                               | 18 923 (97.0%) | 19 512 |             |          |       |
| Man                                 | 7 433 (95.6%)  | 7 774  | 0.68        | 0.57     | 0.81  |
| Other/Undisclosed                   | 120 (96.0%)    | 125    | 0.75        | 0.23     | 2.44  |
| <b>Healthcare Experience</b>        |                |        |             |          |       |
| No                                  | 16 146 (95.9%) | 16 835 |             |          |       |
| Yes                                 | 10 330 (97.7%) | 10 576 | 1.79        | 1.48     | 2.18  |
| <b>Cognitive Health</b>             |                |        |             |          |       |
| Average or above                    | 24 934 (96.8%) | 25 766 |             |          |       |
| Below average                       | 1 542 (93.7%)  | 1 645  | 0.50        | 0.38     | 0.66  |
| <b>Mental Health</b>                |                |        |             |          |       |
| Average or above                    | 22 998 (96.6%) | 23 798 |             |          |       |
| Below average                       | 3 478 (96.3%)  | 3 613  | 0.90        | 0.70     | 1.14  |
| <b>Illness Experience</b>           |                |        |             |          |       |
| No                                  | 15 795 (96.6%) | 16 351 |             |          |       |
| Yes                                 | 10 681 (96.6%) | 11 060 | 0.99        | 0.83     | 1.18  |
| <b>Brain Disease Caregiver</b>      |                |        |             |          |       |
| No                                  | 14 168 (96.6%) | 14 668 |             |          |       |
| Yes                                 | 12 308 (96.6%) | 12 743 | 1.00        | 0.84     | 1.19  |
| <b>Brain Research Participation</b> |                |        |             |          |       |
| No                                  | 15 050 (96.7%) | 15 571 |             |          |       |
| Yes                                 | 11 426 (96.5%) | 11 840 | 0.96        | 0.80     | 1.14  |
| <b>Relationship</b>                 |                |        |             |          |       |
| Not stable                          | 11 704 (96.8%) | 12 087 |             |          |       |
| Stable                              | 14 772 (96.4%) | 15 324 | 0.88        | 0.74     | 1.04  |



## 2.4 In your opinion, is it important to look after one's brain in *young adulthood*?

Table 15: Q2 Young adulthood

| Variable/Subgroup                   | Descriptive    |        | Inferential |          |       |
|-------------------------------------|----------------|--------|-------------|----------|-------|
|                                     | Positive       | N      | OR          | CI (99%) |       |
|                                     |                |        |             | Lower    | Upper |
| <b>Age</b>                          |                |        |             |          |       |
| >= 61                               | 11 941 (94.5%) | 12 631 |             |          |       |
| <= 40                               | 4 276 (95.4%)  | 4 480  | 1.21        | 0.98     | 1.50  |
| 41-60                               | 9 925 (96.5%)  | 10 286 | 1.59        | 1.34     | 1.89  |
| <b>Education</b>                    |                |        |             |          |       |
| Higher                              | 17 946 (95.3%) | 18 822 |             |          |       |
| Lower                               | 8 196 (95.6%)  | 8 575  | 1.06        | 0.90     | 1.24  |
| <b>Gender</b>                       |                |        |             |          |       |
| Woman                               | 18 769 (96.2%) | 19 505 |             |          |       |
| Other/Undisclosed                   | 116 (92.8%)    | 125    | 0.51        | 0.21     | 1.24  |
| Man                                 | 7 257 (93.4%)  | 7 767  | 0.56        | 0.48     | 0.65  |
| <b>Healthcare Experience</b>        |                |        |             |          |       |
| No                                  | 15 927 (94.7%) | 16 823 |             |          |       |
| Yes                                 | 10 215 (96.6%) | 10 574 | 1.60        | 1.36     | 1.89  |
| <b>Cognitive Health</b>             |                |        |             |          |       |
| Average or above                    | 24 608 (95.6%) | 25 754 |             |          |       |
| Below average                       | 1 534 (93.4%)  | 1 643  | 0.66        | 0.50     | 0.86  |
| <b>Mental Health</b>                |                |        |             |          |       |
| Average or above                    | 22 725 (95.5%) | 23 787 |             |          |       |
| Below average                       | 3 417 (94.7%)  | 3 610  | 0.83        | 0.67     | 1.02  |
| <b>Illness Experience</b>           |                |        |             |          |       |
| No                                  | 15 563 (95.2%) | 16 347 |             |          |       |
| Yes                                 | 10 579 (95.7%) | 11 050 | 1.13        | 0.97     | 1.32  |
| <b>Brain Disease Caregiver</b>      |                |        |             |          |       |
| No                                  | 13 920 (95.0%) | 14 654 |             |          |       |
| Yes                                 | 12 222 (95.9%) | 12 743 | 1.24        | 1.06     | 1.44  |
| <b>Brain Research Participation</b> |                |        |             |          |       |
| No                                  | 14 847 (95.5%) | 15 546 |             |          |       |
| Yes                                 | 11 295 (95.3%) | 11 851 | 0.96        | 0.82     | 1.11  |
| <b>Relationship</b>                 |                |        |             |          |       |
| Not stable                          | 11 511 (95.3%) | 12 085 |             |          |       |
| Stable                              | 14 631 (95.6%) | 15 312 | 1.07        | 0.92     | 1.24  |

## 2.5 In your opinion, is it important to look after one's brain in *middle age*?

Table 16: Q2 Middle age

| Variable/Subgroup                   | Descriptive    |        | Inferential |          |       |
|-------------------------------------|----------------|--------|-------------|----------|-------|
|                                     | Positive       | N      | OR          | CI (99%) |       |
|                                     |                |        |             | Lower    | Upper |
| <b>Age</b>                          |                |        |             |          |       |
| >= 61                               | 12 064 (95.3%) | 12 659 |             |          |       |
| <= 40                               | 4 224 (94.3%)  | 4 478  | 0.82        | 0.67     | 1.00  |
| 41-60                               | 10 004 (97.2%) | 10 297 | 1.68        | 1.40     | 2.03  |
| <b>Education</b>                    |                |        |             |          |       |
| Higher                              | 18 078 (95.9%) | 18 844 |             |          |       |
| Lower                               | 8 214 (95.6%)  | 8 590  | 0.93        | 0.78     | 1.09  |
| <b>Gender</b>                       |                |        |             |          |       |
| Woman                               | 18 951 (97.0%) | 19 536 |             |          |       |
| Other/Undisclosed                   | 111 (88.8%)    | 125    | 0.24        | 0.12     | 0.51  |
| Man                                 | 7 230 (93.0%)  | 7 773  | 0.41        | 0.35     | 0.48  |
| <b>Healthcare Experience</b>        |                |        |             |          |       |
| No                                  | 16 036 (95.2%) | 16 842 |             |          |       |
| Yes                                 | 10 256 (96.8%) | 10 592 | 1.53        | 1.29     | 1.82  |
| <b>Cognitive Health</b>             |                |        |             |          |       |
| Average or above                    | 24 746 (96.0%) | 25 788 |             |          |       |
| Below average                       | 1 546 (93.9%)  | 1 646  | 0.65        | 0.49     | 0.86  |
| <b>Mental Health</b>                |                |        |             |          |       |
| Average or above                    | 22 877 (96.0%) | 23 818 |             |          |       |
| Below average                       | 3 415 (94.4%)  | 3 616  | 0.70        | 0.57     | 0.86  |
| <b>Illness Experience</b>           |                |        |             |          |       |
| No                                  | 15 651 (95.6%) | 16 365 |             |          |       |
| Yes                                 | 10 641 (96.1%) | 11 069 | 1.13        | 0.97     | 1.33  |
| <b>Brain Disease Caregiver</b>      |                |        |             |          |       |
| No                                  | 13 943 (95.1%) | 14 668 |             |          |       |
| Yes                                 | 12 349 (96.7%) | 12 766 | 1.54        | 1.31     | 1.81  |
| <b>Brain Research Participation</b> |                |        |             |          |       |
| No                                  | 14 907 (95.8%) | 15 567 |             |          |       |
| Yes                                 | 11 385 (95.9%) | 11 867 | 1.05        | 0.89     | 1.22  |
| <b>Relationship</b>                 |                |        |             |          |       |
| Not stable                          | 11 564 (95.6%) | 12 097 |             |          |       |
| Stable                              | 14 728 (96.0%) | 15 337 | 1.11        | 0.95     | 1.30  |

2.6 In your opinion, is it important to look after one's brain in *old age*?

Table 17: Q2 Old age

| Variable/Subgroup                   | Descriptive    |        | Inferential |          |       |
|-------------------------------------|----------------|--------|-------------|----------|-------|
|                                     | Positive       | N      | OR          | CI (99%) |       |
|                                     |                |        |             | Lower    | Upper |
| <b>Age</b>                          |                |        |             |          |       |
| >= 61                               | 12 193 (96.2%) | 12 675 |             |          |       |
| <= 40                               | 4 181 (93.3%)  | 4 482  | 0.55        | 0.45     | 0.67  |
| 41-60                               | 9 962 (96.8%)  | 10 294 | 1.19        | 0.98     | 1.43  |
| <b>Education</b>                    |                |        |             |          |       |
| Higher                              | 18 140 (96.2%) | 18 851 |             |          |       |
| Lower                               | 8 196 (95.3%)  | 8 600  | 0.80        | 0.67     | 0.94  |
| <b>Gender</b>                       |                |        |             |          |       |
| Woman                               | 18 970 (97.1%) | 19 545 |             |          |       |
| Other/Undisclosed                   | 115 (92.0%)    | 125    | 0.35        | 0.15     | 0.82  |
| Man                                 | 7 251 (93.2%)  | 7 781  | 0.41        | 0.35     | 0.49  |
| <b>Healthcare Experience</b>        |                |        |             |          |       |
| No                                  | 16 092 (95.4%) | 16 861 |             |          |       |
| Yes                                 | 10 244 (96.7%) | 10 590 | 1.41        | 1.19     | 1.68  |
| <b>Cognitive Health</b>             |                |        |             |          |       |
| Average or above                    | 24 789 (96.1%) | 25 807 |             |          |       |
| Below average                       | 1 547 (94.1%)  | 1 644  | 0.65        | 0.49     | 0.87  |
| <b>Mental Health</b>                |                |        |             |          |       |
| Average or above                    | 22 930 (96.2%) | 23 838 |             |          |       |
| Below average                       | 3 406 (94.3%)  | 3 613  | 0.65        | 0.53     | 0.80  |
| <b>Illness Experience</b>           |                |        |             |          |       |
| No                                  | 15 691 (95.8%) | 16 382 |             |          |       |
| Yes                                 | 10 645 (96.2%) | 11 069 | 1.11        | 0.94     | 1.30  |
| <b>Brain Disease Caregiver</b>      |                |        |             |          |       |
| No                                  | 13 994 (95.3%) | 14 680 |             |          |       |
| Yes                                 | 12 342 (96.6%) | 12 771 | 1.41        | 1.20     | 1.66  |
| <b>Brain Research Participation</b> |                |        |             |          |       |
| No                                  | 14 899 (95.6%) | 15 580 |             |          |       |
| Yes                                 | 11 437 (96.3%) | 11 871 | 1.20        | 1.02     | 1.42  |
| <b>Relationship</b>                 |                |        |             |          |       |
| Not stable                          | 11 564 (95.5%) | 12 106 |             |          |       |
| Stable                              | 14 772 (96.3%) | 15 345 | 1.21        | 1.03     | 1.41  |

### 3 Question 3

#### 3.1 I associate *alzheimer's* with the brain.

Table 18: Q3 Alzheimer's

| Variable/Subgroup                   | Descriptive    |        | Inferential |          |       |
|-------------------------------------|----------------|--------|-------------|----------|-------|
|                                     | Positive       | N      | OR          | CI (99%) |       |
|                                     |                |        |             | Lower    | Upper |
| <b>Age</b>                          |                |        |             |          |       |
| >= 61                               | 12 649 (99.3%) | 12 737 |             |          |       |
| <= 40                               | 4 391 (98.0%)  | 4 479  | 0.35        | 0.23     | 0.51  |
| 41-60                               | 10 248 (99.4%) | 10 314 | 1.08        | 0.71     | 1.65  |
| <b>Education</b>                    |                |        |             |          |       |
| Higher                              | 18 765 (99.3%) | 18 889 |             |          |       |
| Lower                               | 8 523 (98.6%)  | 8 641  | 0.48        | 0.34     | 0.67  |
| <b>Gender</b>                       |                |        |             |          |       |
| Woman                               | 19 467 (99.4%) | 19 589 |             |          |       |
| Man                                 | 7 695 (98.5%)  | 7 815  | 0.40        | 0.29     | 0.56  |
| Other/Undisclosed                   | 126 (100.0%)   | 126    |             |          |       |
| <b>Healthcare Experience</b>        |                |        |             |          |       |
| No                                  | 16 723 (98.9%) | 16 914 |             |          |       |
| Yes                                 | 10 565 (99.5%) | 10 616 | 2.37        | 1.57     | 3.56  |
| <b>Cognitive Health</b>             |                |        |             |          |       |
| Average or above                    | 25 654 (99.1%) | 25 876 |             |          |       |
| Below average                       | 1 634 (98.8%)  | 1 654  | 0.71        | 0.39     | 1.30  |
| <b>Mental Health</b>                |                |        |             |          |       |
| Average or above                    | 23 713 (99.2%) | 23 909 |             |          |       |
| Below average                       | 3 575 (98.7%)  | 3 621  | 0.64        | 0.42     | 0.98  |
| <b>Illness Experience</b>           |                |        |             |          |       |
| No                                  | 16 287 (99.3%) | 16 409 |             |          |       |
| Yes                                 | 11 001 (98.9%) | 11 121 | 0.69        | 0.49     | 0.96  |
| <b>Brain Disease Caregiver</b>      |                |        |             |          |       |
| No                                  | 14 545 (98.8%) | 14 721 |             |          |       |
| Yes                                 | 12 743 (99.5%) | 12 809 | 2.34        | 1.61     | 3.39  |
| <b>Brain Research Participation</b> |                |        |             |          |       |
| No                                  | 15 453 (98.9%) | 15 632 |             |          |       |
| Yes                                 | 11 835 (99.5%) | 11 898 | 2.18        | 1.49     | 3.18  |
| <b>Relationship</b>                 |                |        |             |          |       |
| Not stable                          | 11 992 (98.8%) | 12 137 |             |          |       |
| Stable                              | 15 296 (99.4%) | 15 393 | 1.91        | 1.36     | 2.68  |

### 3.2 I associate *schizophrenia* with the brain.

Table 19: Q3 Schizophrenia

| Variable/Subgroup                   | Descriptive    |        | Inferential |          |       |
|-------------------------------------|----------------|--------|-------------|----------|-------|
|                                     | Positive       | N      | OR          | CI (99%) |       |
|                                     |                |        |             | Lower    | Upper |
| <b>Age</b>                          |                |        |             |          |       |
| >= 61                               | 12 119 (95.1%) | 12 737 |             |          |       |
| <= 40                               | 4 315 (96.3%)  | 4 479  | 1.34        | 1.06     | 1.69  |
| 41-60                               | 9 968 (96.6%)  | 10 314 | 1.47        | 1.23     | 1.75  |
| <b>Education</b>                    |                |        |             |          |       |
| Higher                              | 18 235 (96.5%) | 18 889 |             |          |       |
| Lower                               | 8 167 (94.5%)  | 8 641  | 0.62        | 0.53     | 0.72  |
| <b>Gender</b>                       |                |        |             |          |       |
| Woman                               | 18 893 (96.4%) | 19 589 |             |          |       |
| Man                                 | 7 389 (94.5%)  | 7 815  | 0.64        | 0.54     | 0.75  |
| Other/Undisclosed                   | 120 (95.2%)    | 126    | 0.74        | 0.25     | 2.18  |
| <b>Healthcare Experience</b>        |                |        |             |          |       |
| No                                  | 16 119 (95.3%) | 16 914 |             |          |       |
| Yes                                 | 10 283 (96.9%) | 10 616 | 1.52        | 1.28     | 1.81  |
| <b>Cognitive Health</b>             |                |        |             |          |       |
| Average or above                    | 24 876 (96.1%) | 25 876 |             |          |       |
| Below average                       | 1 526 (92.3%)  | 1 654  | 0.48        | 0.37     | 0.62  |
| <b>Mental Health</b>                |                |        |             |          |       |
| Average or above                    | 22 929 (95.9%) | 23 909 |             |          |       |
| Below average                       | 3 473 (95.9%)  | 3 621  | 1.00        | 0.80     | 1.27  |
| <b>Illness Experience</b>           |                |        |             |          |       |
| No                                  | 15 781 (96.2%) | 16 409 |             |          |       |
| Yes                                 | 10 621 (95.5%) | 11 121 | 0.85        | 0.72     | 0.99  |
| <b>Brain Disease Caregiver</b>      |                |        |             |          |       |
| No                                  | 14 059 (95.5%) | 14 721 |             |          |       |
| Yes                                 | 12 343 (96.4%) | 12 809 | 1.25        | 1.06     | 1.46  |
| <b>Brain Research Participation</b> |                |        |             |          |       |
| No                                  | 14 906 (95.4%) | 15 632 |             |          |       |
| Yes                                 | 11 496 (96.6%) | 11 898 | 1.39        | 1.18     | 1.64  |
| <b>Relationship</b>                 |                |        |             |          |       |
| Not stable                          | 11 651 (96.0%) | 12 137 |             |          |       |
| Stable                              | 14 751 (95.8%) | 15 393 | 0.96        | 0.82     | 1.12  |

### 3.3 I associate *depression* with the brain.

Table 20: Q3 Depression

| Variable/Subgroup                   | Descriptive    |        | Inferential |          |       |
|-------------------------------------|----------------|--------|-------------|----------|-------|
|                                     | Positive       | N      | OR          | CI (99%) |       |
|                                     |                |        |             | Lower    | Upper |
| <b>Age</b>                          |                |        |             |          |       |
| >= 61                               | 11 998 (94.2%) | 12 737 |             |          |       |
| <= 40                               | 4 275 (95.4%)  | 4 479  | 1.29        | 1.05     | 1.59  |
| 41-60                               | 9 911 (96.1%)  | 10 314 | 1.51        | 1.29     | 1.78  |
| <b>Education</b>                    |                |        |             |          |       |
| Higher                              | 18 060 (95.6%) | 18 889 |             |          |       |
| Lower                               | 8 124 (94.0%)  | 8 641  | 0.72        | 0.62     | 0.84  |
| <b>Gender</b>                       |                |        |             |          |       |
| Woman                               | 18 731 (95.6%) | 19 589 |             |          |       |
| Man                                 | 7 332 (93.8%)  | 7 815  | 0.70        | 0.60     | 0.81  |
| Other/Undisclosed                   | 121 (96.0%)    | 126    | 1.11        | 0.34     | 3.61  |
| <b>Healthcare Experience</b>        |                |        |             |          |       |
| No                                  | 15 993 (94.6%) | 16 914 |             |          |       |
| Yes                                 | 10 191 (96.0%) | 10 616 | 1.38        | 1.18     | 1.61  |
| <b>Cognitive Health</b>             |                |        |             |          |       |
| Average or above                    | 24 636 (95.2%) | 25 876 |             |          |       |
| Below average                       | 1 548 (93.6%)  | 1 654  | 0.74        | 0.56     | 0.96  |
| <b>Mental Health</b>                |                |        |             |          |       |
| Average or above                    | 22 696 (94.9%) | 23 909 |             |          |       |
| Below average                       | 3 488 (96.3%)  | 3 621  | 1.40        | 1.10     | 1.78  |
| <b>Illness Experience</b>           |                |        |             |          |       |
| No                                  | 15 607 (95.1%) | 16 409 |             |          |       |
| Yes                                 | 10 577 (95.1%) | 11 121 | 1.00        | 0.86     | 1.16  |
| <b>Brain Disease Caregiver</b>      |                |        |             |          |       |
| No                                  | 13 929 (94.6%) | 14 721 |             |          |       |
| Yes                                 | 12 255 (95.7%) | 12 809 | 1.26        | 1.09     | 1.46  |
| <b>Brain Research Participation</b> |                |        |             |          |       |
| No                                  | 14 770 (94.5%) | 15 632 |             |          |       |
| Yes                                 | 11 414 (95.9%) | 11 898 | 1.38        | 1.18     | 1.60  |
| <b>Relationship</b>                 |                |        |             |          |       |
| Not stable                          | 11 549 (95.2%) | 12 137 |             |          |       |
| Stable                              | 14 635 (95.1%) | 15 393 | 0.98        | 0.85     | 1.14  |

### 3.4 I associate *bipolar* with the brain.

Table 21: Q3 Bipolar

| Variable/Subgroup                   | Descriptive    |        | Inferential |          |       |
|-------------------------------------|----------------|--------|-------------|----------|-------|
|                                     | Positive       | N      | OR          | CI (99%) |       |
|                                     |                |        |             | Lower    | Upper |
| <b>Age</b>                          |                |        |             |          |       |
| >= 61                               | 11 321 (88.9%) | 12 737 |             |          |       |
| <= 40                               | 4 202 (93.8%)  | 4 479  | 1.90        | 1.59     | 2.26  |
| 41-60                               | 9 753 (94.6%)  | 10 314 | 2.17        | 1.90     | 2.49  |
| <b>Education</b>                    |                |        |             |          |       |
| Higher                              | 17 762 (94.0%) | 18 889 |             |          |       |
| Lower                               | 7 514 (87.0%)  | 8 641  | 0.42        | 0.38     | 0.47  |
| <b>Gender</b>                       |                |        |             |          |       |
| Woman                               | 18 332 (93.6%) | 19 589 |             |          |       |
| Man                                 | 6 826 (87.3%)  | 7 815  | 0.47        | 0.42     | 0.53  |
| Other/Undisclosed                   | 118 (93.7%)    | 126    | 1.01        | 0.39     | 2.60  |
| <b>Healthcare Experience</b>        |                |        |             |          |       |
| No                                  | 15 219 (90.0%) | 16 914 |             |          |       |
| Yes                                 | 10 057 (94.7%) | 10 616 | 2.00        | 1.76     | 2.28  |
| <b>Cognitive Health</b>             |                |        |             |          |       |
| Average or above                    | 23 826 (92.1%) | 25 876 |             |          |       |
| Below average                       | 1 450 (87.7%)  | 1 654  | 0.61        | 0.50     | 0.75  |
| <b>Mental Health</b>                |                |        |             |          |       |
| Average or above                    | 21 896 (91.6%) | 23 909 |             |          |       |
| Below average                       | 3 380 (93.3%)  | 3 621  | 1.29        | 1.07     | 1.55  |
| <b>Illness Experience</b>           |                |        |             |          |       |
| No                                  | 15 072 (91.9%) | 16 409 |             |          |       |
| Yes                                 | 10 204 (91.8%) | 11 121 | 0.99        | 0.88     | 1.11  |
| <b>Brain Disease Caregiver</b>      |                |        |             |          |       |
| No                                  | 13 311 (90.4%) | 14 721 |             |          |       |
| Yes                                 | 11 965 (93.4%) | 12 809 | 1.50        | 1.34     | 1.69  |
| <b>Brain Research Participation</b> |                |        |             |          |       |
| No                                  | 14 149 (90.5%) | 15 632 |             |          |       |
| Yes                                 | 11 127 (93.5%) | 11 898 | 1.51        | 1.34     | 1.70  |
| <b>Relationship</b>                 |                |        |             |          |       |
| Not stable                          | 11 232 (92.5%) | 12 137 |             |          |       |
| Stable                              | 14 044 (91.2%) | 15 393 | 0.84        | 0.75     | 0.94  |

### 3.5 I associate *anxiety* with the brain.

Table 22: Q3 Anxiety

| Variable/Subgroup                   | Descriptive    |        | Inferential |          |       |
|-------------------------------------|----------------|--------|-------------|----------|-------|
|                                     | Positive       | N      | OR          | CI (99%) |       |
|                                     |                |        |             | Lower    | Upper |
| <b>Age</b>                          |                |        |             |          |       |
| >= 61                               | 11 336 (89.0%) | 12 737 |             |          |       |
| <= 40                               | 4 126 (92.1%)  | 4 479  | 1.44        | 1.23     | 1.70  |
| 41-60                               | 9 550 (92.6%)  | 10 314 | 1.54        | 1.37     | 1.74  |
| <b>Education</b>                    |                |        |             |          |       |
| Higher                              | 17 310 (91.6%) | 18 889 |             |          |       |
| Lower                               | 7 702 (89.1%)  | 8 641  | 0.75        | 0.67     | 0.84  |
| <b>Gender</b>                       |                |        |             |          |       |
| Woman                               | 17 905 (91.4%) | 19 589 |             |          |       |
| Man                                 | 6 987 (89.4%)  | 7 815  | 0.79        | 0.71     | 0.89  |
| Other/Undisclosed                   | 120 (95.2%)    | 126    | 1.88        | 0.64     | 5.55  |
| <b>Healthcare Experience</b>        |                |        |             |          |       |
| No                                  | 15 250 (90.2%) | 16 914 |             |          |       |
| Yes                                 | 9 762 (92.0%)  | 10 616 | 1.25        | 1.11     | 1.40  |
| <b>Cognitive Health</b>             |                |        |             |          |       |
| Average or above                    | 23 536 (91.0%) | 25 876 |             |          |       |
| Below average                       | 1 476 (89.2%)  | 1 654  | 0.82        | 0.67     | 1.02  |
| <b>Mental Health</b>                |                |        |             |          |       |
| Average or above                    | 21 627 (90.5%) | 23 909 |             |          |       |
| Below average                       | 3 385 (93.5%)  | 3 621  | 1.51        | 1.26     | 1.82  |
| <b>Illness Experience</b>           |                |        |             |          |       |
| No                                  | 14 870 (90.6%) | 16 409 |             |          |       |
| Yes                                 | 10 142 (91.2%) | 11 121 | 1.07        | 0.96     | 1.20  |
| <b>Brain Disease Caregiver</b>      |                |        |             |          |       |
| No                                  | 13 266 (90.1%) | 14 721 |             |          |       |
| Yes                                 | 11 746 (91.7%) | 12 809 | 1.21        | 1.09     | 1.35  |
| <b>Brain Research Participation</b> |                |        |             |          |       |
| No                                  | 14 048 (89.9%) | 15 632 |             |          |       |
| Yes                                 | 10 964 (92.1%) | 11 898 | 1.32        | 1.18     | 1.48  |
| <b>Relationship</b>                 |                |        |             |          |       |
| Not stable                          | 11 027 (90.9%) | 12 137 |             |          |       |
| Stable                              | 13 985 (90.9%) | 15 393 | 1.00        | 0.90     | 1.11  |



3.6 I associate *addiction* with the brain.

Table 23: Q3 Addiction

| Variable/Subgroup                   | Descriptive    |        | Inferential |          |       |
|-------------------------------------|----------------|--------|-------------|----------|-------|
|                                     | Positive       | N      | OR          | CI (99%) |       |
|                                     |                |        |             | Lower    | Upper |
| <b>Age</b>                          |                |        |             |          |       |
| >= 61                               | 11 025 (86.6%) | 12 737 |             |          |       |
| 41-60                               | 9 263 (89.8%)  | 10 314 | 1.37        | 1.23     | 1.52  |
| <= 40                               | 4 059 (90.6%)  | 4 479  | 1.50        | 1.29     | 1.74  |
| <b>Education</b>                    |                |        |             |          |       |
| Higher                              | 17 005 (90.0%) | 18 889 |             |          |       |
| Lower                               | 7 342 (85.0%)  | 8 641  | 0.63        | 0.57     | 0.69  |
| <b>Gender</b>                       |                |        |             |          |       |
| Woman                               | 17 634 (90.0%) | 19 589 |             |          |       |
| Man                                 | 6 599 (84.4%)  | 7 815  | 0.60        | 0.54     | 0.67  |
| Other/Undisclosed                   | 114 (90.5%)    | 126    | 1.05        | 0.48     | 2.31  |
| <b>Healthcare Experience</b>        |                |        |             |          |       |
| No                                  | 14 542 (86.0%) | 16 914 |             |          |       |
| Yes                                 | 9 805 (92.4%)  | 10 616 | 1.97        | 1.77     | 2.20  |
| <b>Cognitive Health</b>             |                |        |             |          |       |
| Average or above                    | 22 952 (88.7%) | 25 876 |             |          |       |
| Below average                       | 1 395 (84.3%)  | 1 654  | 0.69        | 0.57     | 0.82  |
| <b>Mental Health</b>                |                |        |             |          |       |
| Average or above                    | 21 109 (88.3%) | 23 909 |             |          |       |
| Below average                       | 3 238 (89.4%)  | 3 621  | 1.12        | 0.97     | 1.30  |
| <b>Illness Experience</b>           |                |        |             |          |       |
| No                                  | 14 492 (88.3%) | 16 409 |             |          |       |
| Yes                                 | 9 855 (88.6%)  | 11 121 | 1.03        | 0.93     | 1.14  |
| <b>Brain Disease Caregiver</b>      |                |        |             |          |       |
| No                                  | 12 859 (87.4%) | 14 721 |             |          |       |
| Yes                                 | 11 488 (89.7%) | 12 809 | 1.26        | 1.14     | 1.39  |
| <b>Brain Research Participation</b> |                |        |             |          |       |
| No                                  | 13 645 (87.3%) | 15 632 |             |          |       |
| Yes                                 | 10 702 (89.9%) | 11 898 | 1.30        | 1.18     | 1.44  |
| <b>Relationship</b>                 |                |        |             |          |       |
| Not stable                          | 10 825 (89.2%) | 12 137 |             |          |       |
| Stable                              | 13 522 (87.8%) | 15 393 | 0.88        | 0.79     | 0.97  |

3.7 I associate *stroke* with the brain.

Table 24: Q3 Stroke

| Variable/Subgroup                   | Descriptive    |        | Inferential |          |       |
|-------------------------------------|----------------|--------|-------------|----------|-------|
|                                     | Positive       | N      | OR          | CI (99%) |       |
|                                     |                |        |             | Lower    | Upper |
| <b>Age</b>                          |                |        |             |          |       |
| >= 61                               | 11 174 (87.7%) | 12 737 |             |          |       |
| <= 40                               | 3 785 (84.5%)  | 4 479  | 0.76        | 0.67     | 0.87  |
| 41-60                               | 9 206 (89.3%)  | 10 314 | 1.16        | 1.04     | 1.29  |
| <b>Education</b>                    |                |        |             |          |       |
| Higher                              | 16 671 (88.3%) | 18 889 |             |          |       |
| Lower                               | 7 494 (86.7%)  | 8 641  | 0.87        | 0.79     | 0.96  |
| <b>Gender</b>                       |                |        |             |          |       |
| Woman                               | 17 612 (89.9%) | 19 589 |             |          |       |
| Man                                 | 6 440 (82.4%)  | 7 815  | 0.53        | 0.48     | 0.58  |
| Other/Undisclosed                   | 113 (89.7%)    | 126    | 0.98        | 0.46     | 2.08  |
| <b>Healthcare Experience</b>        |                |        |             |          |       |
| No                                  | 14 292 (84.5%) | 16 914 |             |          |       |
| Yes                                 | 9 873 (93.0%)  | 10 616 | 2.44        | 2.18     | 2.73  |
| <b>Cognitive Health</b>             |                |        |             |          |       |
| Average or above                    | 22 748 (87.9%) | 25 876 |             |          |       |
| Below average                       | 1 417 (85.7%)  | 1 654  | 0.82        | 0.68     | 0.99  |
| <b>Mental Health</b>                |                |        |             |          |       |
| Average or above                    | 21 018 (87.9%) | 23 909 |             |          |       |
| Below average                       | 3 147 (86.9%)  | 3 621  | 0.91        | 0.80     | 1.05  |
| <b>Illness Experience</b>           |                |        |             |          |       |
| No                                  | 14 228 (86.7%) | 16 409 |             |          |       |
| Yes                                 | 9 937 (89.4%)  | 11 121 | 1.29        | 1.17     | 1.42  |
| <b>Brain Disease Caregiver</b>      |                |        |             |          |       |
| No                                  | 12 575 (85.4%) | 14 721 |             |          |       |
| Yes                                 | 11 590 (90.5%) | 12 809 | 1.62        | 1.47     | 1.79  |
| <b>Brain Research Participation</b> |                |        |             |          |       |
| No                                  | 13 555 (86.7%) | 15 632 |             |          |       |
| Yes                                 | 10 610 (89.2%) | 11 898 | 1.26        | 1.15     | 1.39  |
| <b>Relationship</b>                 |                |        |             |          |       |
| Not stable                          | 10 537 (86.8%) | 12 137 |             |          |       |
| Stable                              | 13 628 (88.5%) | 15 393 | 1.17        | 1.07     | 1.29  |

3.8 I associate *parkinson's* with the brain.

Table 25: Q3 Parkinson's

| Variable/Subgroup                   | Descriptive    |        | Inferential |          |       |
|-------------------------------------|----------------|--------|-------------|----------|-------|
|                                     | Positive       | N      | OR          | CI (99%) |       |
|                                     |                |        |             | Lower    | Upper |
| <b>Age</b>                          |                |        |             |          |       |
| >= 61                               | 10 961 (86.1%) | 12 737 |             |          |       |
| <= 40                               | 3 727 (83.2%)  | 4 479  | 0.80        | 0.71     | 0.91  |
| 41-60                               | 9 021 (87.5%)  | 10 314 | 1.13        | 1.02     | 1.25  |
| <b>Education</b>                    |                |        |             |          |       |
| Higher                              | 16 612 (87.9%) | 18 889 |             |          |       |
| Lower                               | 7 097 (82.1%)  | 8 641  | 0.63        | 0.57     | 0.69  |
| <b>Gender</b>                       |                |        |             |          |       |
| Woman                               | 17 017 (86.9%) | 19 589 |             |          |       |
| Man                                 | 6 585 (84.3%)  | 7 815  | 0.81        | 0.73     | 0.89  |
| Other/Undisclosed                   | 107 (84.9%)    | 126    | 0.85        | 0.45     | 1.62  |
| <b>Healthcare Experience</b>        |                |        |             |          |       |
| No                                  | 14 054 (83.1%) | 16 914 |             |          |       |
| Yes                                 | 9 655 (90.9%)  | 10 616 | 2.04        | 1.85     | 2.26  |
| <b>Cognitive Health</b>             |                |        |             |          |       |
| Average or above                    | 22 337 (86.3%) | 25 876 |             |          |       |
| Below average                       | 1 372 (83.0%)  | 1 654  | 0.77        | 0.65     | 0.92  |
| <b>Mental Health</b>                |                |        |             |          |       |
| Average or above                    | 20 658 (86.4%) | 23 909 |             |          |       |
| Below average                       | 3 051 (84.3%)  | 3 621  | 0.84        | 0.74     | 0.96  |
| <b>Illness Experience</b>           |                |        |             |          |       |
| No                                  | 14 066 (85.7%) | 16 409 |             |          |       |
| Yes                                 | 9 643 (86.7%)  | 11 121 | 1.09        | 0.99     | 1.19  |
| <b>Brain Disease Caregiver</b>      |                |        |             |          |       |
| No                                  | 12 381 (84.1%) | 14 721 |             |          |       |
| Yes                                 | 11 328 (88.4%) | 12 809 | 1.45        | 1.32     | 1.58  |
| <b>Brain Research Participation</b> |                |        |             |          |       |
| No                                  | 13 190 (84.4%) | 15 632 |             |          |       |
| Yes                                 | 10 519 (88.4%) | 11 898 | 1.41        | 1.29     | 1.55  |
| <b>Relationship</b>                 |                |        |             |          |       |
| Not stable                          | 10 314 (85.0%) | 12 137 |             |          |       |
| Stable                              | 13 395 (87.0%) | 15 393 | 1.18        | 1.08     | 1.30  |

### 3.9 I associate *migraine* with the brain.

Table 26: Q3 Migraine

| Variable/Subgroup                   | Descriptive    |        | Inferential |          |       |
|-------------------------------------|----------------|--------|-------------|----------|-------|
|                                     | Positive       | N      | OR          | CI (99%) |       |
|                                     |                |        |             | Lower    | Upper |
| <b>Age</b>                          |                |        |             |          |       |
| >= 61                               | 9 880 (77.6%)  | 12 737 |             |          |       |
| 41-60                               | 8 870 (86.0%)  | 10 314 | 1.78        | 1.62     | 1.95  |
| <= 40                               | 3 954 (88.3%)  | 4 479  | 2.18        | 1.91     | 2.48  |
| <b>Education</b>                    |                |        |             |          |       |
| Higher                              | 15 915 (84.3%) | 18 889 |             |          |       |
| Lower                               | 6 789 (78.6%)  | 8 641  | 0.69        | 0.63     | 0.75  |
| <b>Gender</b>                       |                |        |             |          |       |
| Woman                               | 16 366 (83.5%) | 19 589 |             |          |       |
| Man                                 | 6 232 (79.7%)  | 7 815  | 0.78        | 0.71     | 0.85  |
| Other/Undisclosed                   | 106 (84.1%)    | 126    | 1.04        | 0.56     | 1.96  |
| <b>Healthcare Experience</b>        |                |        |             |          |       |
| No                                  | 13 446 (79.5%) | 16 914 |             |          |       |
| Yes                                 | 9 258 (87.2%)  | 10 616 | 1.76        | 1.61     | 1.92  |
| <b>Cognitive Health</b>             |                |        |             |          |       |
| Average or above                    | 21 407 (82.7%) | 25 876 |             |          |       |
| Below average                       | 1 297 (78.4%)  | 1 654  | 0.76        | 0.65     | 0.89  |
| <b>Mental Health</b>                |                |        |             |          |       |
| Average or above                    | 19 708 (82.4%) | 23 909 |             |          |       |
| Below average                       | 2 996 (82.7%)  | 3 621  | 1.02        | 0.90     | 1.15  |
| <b>Illness Experience</b>           |                |        |             |          |       |
| No                                  | 13 431 (81.9%) | 16 409 |             |          |       |
| Yes                                 | 9 273 (83.4%)  | 11 121 | 1.11        | 1.02     | 1.21  |
| <b>Brain Disease Caregiver</b>      |                |        |             |          |       |
| No                                  | 11 912 (80.9%) | 14 721 |             |          |       |
| Yes                                 | 10 792 (84.3%) | 12 809 | 1.26        | 1.16     | 1.37  |
| <b>Brain Research Participation</b> |                |        |             |          |       |
| No                                  | 12 796 (81.9%) | 15 632 |             |          |       |
| Yes                                 | 9 908 (83.3%)  | 11 898 | 1.10        | 1.02     | 1.20  |
| <b>Relationship</b>                 |                |        |             |          |       |
| Not stable                          | 9 976 (82.2%)  | 12 137 |             |          |       |
| Stable                              | 12 728 (82.7%) | 15 393 | 1.03        | 0.95     | 1.12  |

3.10 I associate *cancer* with the brain.

Table 27: Q3 Cancer

| Variable/Subgroup                   | Descriptive   |        | Inferential |          |       |
|-------------------------------------|---------------|--------|-------------|----------|-------|
|                                     | Positive      | N      | OR          | CI (99%) |       |
|                                     |               |        |             | Lower    | Upper |
| <b>Age</b>                          |               |        |             |          |       |
| >= 61                               | 3 627 (28.5%) | 12 737 |             |          |       |
| 41-60                               | 3 513 (34.1%) | 10 314 | 1.30        | 1.21     | 1.40  |
| <= 40                               | 1 709 (38.2%) | 4 479  | 1.55        | 1.41     | 1.70  |
| <b>Education</b>                    |               |        |             |          |       |
| Higher                              | 6 457 (34.2%) | 18 889 |             |          |       |
| Lower                               | 2 392 (27.7%) | 8 641  | 0.74        | 0.68     | 0.79  |
| <b>Gender</b>                       |               |        |             |          |       |
| Woman                               | 6 623 (33.8%) | 19 589 |             |          |       |
| Man                                 | 2 179 (27.9%) | 7 815  | 0.76        | 0.70     | 0.82  |
| Other/Undisclosed                   | 47 (37.3%)    | 126    | 1.16        | 0.72     | 1.88  |
| <b>Healthcare Experience</b>        |               |        |             |          |       |
| No                                  | 4 634 (27.4%) | 16 914 |             |          |       |
| Yes                                 | 4 215 (39.7%) | 10 616 | 1.74        | 1.63     | 1.87  |
| <b>Cognitive Health</b>             |               |        |             |          |       |
| Average or above                    | 8 381 (32.4%) | 25 876 |             |          |       |
| Below average                       | 468 (28.3%)   | 1 654  | 0.82        | 0.71     | 0.95  |
| <b>Mental Health</b>                |               |        |             |          |       |
| Average or above                    | 7 625 (31.9%) | 23 909 |             |          |       |
| Below average                       | 1 224 (33.8%) | 3 621  | 1.09        | 0.99     | 1.20  |
| <b>Illness Experience</b>           |               |        |             |          |       |
| No                                  | 5 099 (31.1%) | 16 409 |             |          |       |
| Yes                                 | 3 750 (33.7%) | 11 121 | 1.13        | 1.05     | 1.21  |
| <b>Brain Disease Caregiver</b>      |               |        |             |          |       |
| No                                  | 4 390 (29.8%) | 14 721 |             |          |       |
| Yes                                 | 4 459 (34.8%) | 12 809 | 1.26        | 1.18     | 1.34  |
| <b>Brain Research Participation</b> |               |        |             |          |       |
| No                                  | 4 801 (30.7%) | 15 632 |             |          |       |
| Yes                                 | 4 048 (34.0%) | 11 898 | 1.16        | 1.09     | 1.24  |
| <b>Relationship</b>                 |               |        |             |          |       |
| Not stable                          | 3 892 (32.1%) | 12 137 |             |          |       |
| Stable                              | 4 957 (32.2%) | 15 393 | 1.01        | 0.94     | 1.08  |

3.11 I associate *hypertension* with the brain.

Table 28: Q3 Hypertension

| Variable/Subgroup                   | Descriptive   |        | Inferential |          |       |
|-------------------------------------|---------------|--------|-------------|----------|-------|
|                                     | Positive      | N      | OR          | CI (99%) |       |
|                                     |               |        |             | Lower    | Upper |
| <b>Age</b>                          |               |        |             |          |       |
| >= 61                               | 4 353 (34.2%) | 12 737 |             |          |       |
| <= 40                               | 1 136 (25.4%) | 4 479  | 0.65        | 0.59     | 0.72  |
| 41-60                               | 3 247 (31.5%) | 10 314 | 0.88        | 0.82     | 0.95  |
| <b>Education</b>                    |               |        |             |          |       |
| Higher                              | 6 326 (33.5%) | 18 889 |             |          |       |
| Lower                               | 2 410 (27.9%) | 8 641  | 0.77        | 0.71     | 0.83  |
| <b>Gender</b>                       |               |        |             |          |       |
| Woman                               | 6 610 (33.7%) | 19 589 |             |          |       |
| Man                                 | 2 074 (26.5%) | 7 815  | 0.71        | 0.66     | 0.77  |
| Other/Undisclosed                   | 52 (41.3%)    | 126    | 1.38        | 0.86     | 2.20  |
| <b>Healthcare Experience</b>        |               |        |             |          |       |
| No                                  | 4 214 (24.9%) | 16 914 |             |          |       |
| Yes                                 | 4 522 (42.6%) | 10 616 | 2.24        | 2.09     | 2.39  |
| <b>Cognitive Health</b>             |               |        |             |          |       |
| Average or above                    | 8 247 (31.9%) | 25 876 |             |          |       |
| Below average                       | 489 (29.6%)   | 1 654  | 0.90        | 0.78     | 1.04  |
| <b>Mental Health</b>                |               |        |             |          |       |
| Average or above                    | 7 713 (32.3%) | 23 909 |             |          |       |
| Below average                       | 1 023 (28.3%) | 3 621  | 0.83        | 0.75     | 0.92  |
| <b>Illness Experience</b>           |               |        |             |          |       |
| No                                  | 4 940 (30.1%) | 16 409 |             |          |       |
| Yes                                 | 3 796 (34.1%) | 11 121 | 1.20        | 1.12     | 1.29  |
| <b>Brain Disease Caregiver</b>      |               |        |             |          |       |
| No                                  | 4 044 (27.5%) | 14 721 |             |          |       |
| Yes                                 | 4 692 (36.6%) | 12 809 | 1.53        | 1.43     | 1.63  |
| <b>Brain Research Participation</b> |               |        |             |          |       |
| No                                  | 4 662 (29.8%) | 15 632 |             |          |       |
| Yes                                 | 4 074 (34.2%) | 11 898 | 1.23        | 1.15     | 1.31  |
| <b>Relationship</b>                 |               |        |             |          |       |
| Not stable                          | 3 738 (30.8%) | 12 137 |             |          |       |
| Stable                              | 4 998 (32.5%) | 15 393 | 1.08        | 1.01     | 1.16  |

3.12 I associate *diabetes* with the brain.

Table 29: Q3 Diabetes

| Variable/Subgroup                   | Descriptive   |        | Inferential |          |       |
|-------------------------------------|---------------|--------|-------------|----------|-------|
|                                     | Positive      | N      | OR          | CI (99%) |       |
|                                     |               |        |             | Lower    | Upper |
| <b>Age</b>                          |               |        |             |          |       |
| >= 61                               | 1 943 (15.3%) | 12 737 |             |          |       |
| <= 40                               | 658 (14.7%)   | 4 479  | 0.96        | 0.84     | 1.09  |
| 41-60                               | 1 775 (17.2%) | 10 314 | 1.15        | 1.05     | 1.27  |
| <b>Education</b>                    |               |        |             |          |       |
| Higher                              | 3 271 (17.3%) | 18 889 |             |          |       |
| Lower                               | 1 105 (12.8%) | 8 641  | 0.70        | 0.64     | 0.77  |
| <b>Gender</b>                       |               |        |             |          |       |
| Woman                               | 3 265 (16.7%) | 19 589 |             |          |       |
| Man                                 | 1 079 (13.8%) | 7 815  | 0.80        | 0.73     | 0.88  |
| Other/Undisclosed                   | 32 (25.4%)    | 126    | 1.70        | 1.00     | 2.89  |
| <b>Healthcare Experience</b>        |               |        |             |          |       |
| No                                  | 1 793 (10.6%) | 16 914 |             |          |       |
| Yes                                 | 2 583 (24.3%) | 10 616 | 2.71        | 2.49     | 2.96  |
| <b>Cognitive Health</b>             |               |        |             |          |       |
| Average or above                    | 4 117 (15.9%) | 25 876 |             |          |       |
| Below average                       | 259 (15.7%)   | 1 654  | 0.98        | 0.82     | 1.17  |
| <b>Mental Health</b>                |               |        |             |          |       |
| Average or above                    | 3 875 (16.2%) | 23 909 |             |          |       |
| Below average                       | 501 (13.8%)   | 3 621  | 0.83        | 0.73     | 0.95  |
| <b>Illness Experience</b>           |               |        |             |          |       |
| No                                  | 2 405 (14.7%) | 16 409 |             |          |       |
| Yes                                 | 1 971 (17.7%) | 11 121 | 1.25        | 1.15     | 1.37  |
| <b>Brain Disease Caregiver</b>      |               |        |             |          |       |
| No                                  | 1 995 (13.6%) | 14 721 |             |          |       |
| Yes                                 | 2 381 (18.6%) | 12 809 | 1.46        | 1.34     | 1.59  |
| <b>Brain Research Participation</b> |               |        |             |          |       |
| No                                  | 2 320 (14.8%) | 15 632 |             |          |       |
| Yes                                 | 2 056 (17.3%) | 11 898 | 1.20        | 1.10     | 1.31  |
| <b>Relationship</b>                 |               |        |             |          |       |
| Not stable                          | 1 934 (15.9%) | 12 137 |             |          |       |
| Stable                              | 2 442 (15.9%) | 15 393 | 0.99        | 0.91     | 1.08  |

3.13 I associate *arthritis* with the brain.

Table 30: Q3 Arthritis

| Variable/Subgroup                   | Descriptive  |        | Inferential |          |       |
|-------------------------------------|--------------|--------|-------------|----------|-------|
|                                     | Positive     | N      | OR          | CI (99%) |       |
|                                     |              |        |             | Lower    | Upper |
| <b>Age</b>                          |              |        |             |          |       |
| >= 61                               | 578 (4.5%)   | 12 737 |             |          |       |
| <= 40                               | 205 (4.6%)   | 4 479  | 1.01        | 0.81     | 1.25  |
| 41-60                               | 535 (5.2%)   | 10 314 | 1.15        | 0.98     | 1.35  |
| <b>Education</b>                    |              |        |             |          |       |
| Higher                              | 920 (4.9%)   | 18 889 |             |          |       |
| Lower                               | 398 (4.6%)   | 8 641  | 0.94        | 0.80     | 1.11  |
| <b>Gender</b>                       |              |        |             |          |       |
| Woman                               | 1 005 (5.1%) | 19 589 |             |          |       |
| Man                                 | 305 (3.9%)   | 7 815  | 0.75        | 0.63     | 0.89  |
| Other/Undisclosed                   | 8 (6.3%)     | 126    | 1.25        | 0.49     | 3.23  |
| <b>Healthcare Experience</b>        |              |        |             |          |       |
| No                                  | 577 (3.4%)   | 16 914 |             |          |       |
| Yes                                 | 741 (7.0%)   | 10 616 | 2.12        | 1.83     | 2.46  |
| <b>Cognitive Health</b>             |              |        |             |          |       |
| Average or above                    | 1 216 (4.7%) | 25 876 |             |          |       |
| Below average                       | 102 (6.2%)   | 1 654  | 1.33        | 1.01     | 1.75  |
| <b>Mental Health</b>                |              |        |             |          |       |
| Average or above                    | 1 151 (4.8%) | 23 909 |             |          |       |
| Below average                       | 167 (4.6%)   | 3 621  | 0.96        | 0.77     | 1.19  |
| <b>Illness Experience</b>           |              |        |             |          |       |
| No                                  | 641 (3.9%)   | 16 409 |             |          |       |
| Yes                                 | 677 (6.1%)   | 11 121 | 1.59        | 1.38     | 1.84  |
| <b>Brain Disease Caregiver</b>      |              |        |             |          |       |
| No                                  | 622 (4.2%)   | 14 721 |             |          |       |
| Yes                                 | 696 (5.4%)   | 12 809 | 1.30        | 1.13     | 1.51  |
| <b>Brain Research Participation</b> |              |        |             |          |       |
| No                                  | 737 (4.7%)   | 15 632 |             |          |       |
| Yes                                 | 581 (4.9%)   | 11 898 | 1.04        | 0.90     | 1.20  |
| <b>Relationship</b>                 |              |        |             |          |       |
| Not stable                          | 631 (5.2%)   | 12 137 |             |          |       |
| Stable                              | 687 (4.5%)   | 15 393 | 0.85        | 0.74     | 0.99  |



1  
2  
3  
4  
5  
6  
7  
8  
9  
10  
11  
12  
13  
14  
15  
16  
17  
18  
19  
20  
21  
22  
23  
24  
25  
26  
27  
28  
29  
30  
31  
32  
33  
34  
35  
36  
37  
38  
39  
40  
41  
42  
43  
44  
45  
46  
47  
48  
49  
50  
51  
52  
53  
54  
55  
56  
57  
58  
59  
60

->

For peer review only

# Reporting checklist for cross sectional study.

Based on the STROBE cross sectional guidelines.

## Instructions to authors

Complete this checklist by entering the page numbers from your manuscript where readers will find each of the items listed below.

Your article may not currently address all the items on the checklist. Please modify your text to include the missing information. If you are certain that an item does not apply, please write "n/a" and provide a short explanation.

Upload your completed checklist as an extra file when you submit to a journal.

In your methods section, say that you used the STROBE cross sectional reporting guidelines, and cite them as:

von Elm E, Altman DG, Egger M, Pocock SJ, Gotsche PC, Vandenbroucke JP. The Strengthening the Reporting of Observational Studies in Epidemiology (STROBE) Statement: guidelines for reporting observational studies.

|                           | Reporting Item                                                                                         | Page Number |
|---------------------------|--------------------------------------------------------------------------------------------------------|-------------|
| <b>Title and abstract</b> |                                                                                                        |             |
| Title                     | <a href="#">#1a</a> Indicate the study's design with a commonly used term in the title or the abstract | 1           |

|    |                      |                     |                                                                 |     |
|----|----------------------|---------------------|-----------------------------------------------------------------|-----|
| 1  | Abstract             | <a href="#">#1b</a> | Provide in the abstract an informative and balanced summary     | 4   |
| 2  |                      |                     | of what was done and what was found                             |     |
| 3  |                      |                     |                                                                 |     |
| 4  |                      |                     |                                                                 |     |
| 5  |                      |                     |                                                                 |     |
| 6  | <b>Introduction</b>  |                     |                                                                 |     |
| 7  |                      |                     |                                                                 |     |
| 8  |                      |                     |                                                                 |     |
| 9  | Background /         | <a href="#">#2</a>  | Explain the scientific background and rationale for the         | 5-6 |
| 10 | rationale            |                     | investigation being reported                                    |     |
| 11 |                      |                     |                                                                 |     |
| 12 |                      |                     |                                                                 |     |
| 13 |                      |                     |                                                                 |     |
| 14 |                      |                     |                                                                 |     |
| 15 | Objectives           | <a href="#">#3</a>  | State specific objectives, including any prespecified           | 5-6 |
| 16 |                      |                     | hypotheses                                                      |     |
| 17 |                      |                     |                                                                 |     |
| 18 |                      |                     |                                                                 |     |
| 19 |                      |                     |                                                                 |     |
| 20 | <b>Methods</b>       |                     |                                                                 |     |
| 21 |                      |                     |                                                                 |     |
| 22 |                      |                     |                                                                 |     |
| 23 | Study design         | <a href="#">#4</a>  | Present key elements of study design early in the paper         | 6   |
| 24 |                      |                     |                                                                 |     |
| 25 |                      |                     |                                                                 |     |
| 26 | Setting              | <a href="#">#5</a>  | Describe the setting, locations, and relevant dates, including  | 6   |
| 27 |                      |                     | periods of recruitment, exposure, follow-up, and data           |     |
| 28 |                      |                     | collection                                                      |     |
| 29 |                      |                     |                                                                 |     |
| 30 |                      |                     |                                                                 |     |
| 31 |                      |                     |                                                                 |     |
| 32 |                      |                     |                                                                 |     |
| 33 |                      |                     |                                                                 |     |
| 34 | Eligibility criteria | <a href="#">#6a</a> | Give the eligibility criteria, and the sources and methods of   | 6   |
| 35 |                      |                     | selection of participants.                                      |     |
| 36 |                      |                     |                                                                 |     |
| 37 |                      |                     |                                                                 |     |
| 38 |                      |                     |                                                                 |     |
| 39 |                      | <a href="#">#7</a>  | Clearly define all outcomes, exposures, predictors, potential   | N/A |
| 40 |                      |                     | confounders, and effect modifiers. Give diagnostic criteria, if |     |
| 41 |                      |                     | applicable                                                      |     |
| 42 |                      |                     |                                                                 |     |
| 43 |                      |                     |                                                                 |     |
| 44 |                      |                     |                                                                 |     |
| 45 |                      |                     |                                                                 |     |
| 46 |                      |                     |                                                                 |     |
| 47 | Data sources /       | <a href="#">#8</a>  | For each variable of interest give sources of data and details  | 7-8 |
| 48 | measurement          |                     | of methods of assessment (measurement). Describe                |     |
| 49 |                      |                     | comparability of assessment methods if there is more than       |     |
| 50 |                      |                     | one group. Give information separately for for exposed and      |     |
| 51 |                      |                     | unexposed groups if applicable.                                 |     |
| 52 |                      |                     |                                                                 |     |
| 53 |                      |                     |                                                                 |     |
| 54 |                      |                     |                                                                 |     |
| 55 |                      |                     |                                                                 |     |
| 56 |                      |                     |                                                                 |     |
| 57 |                      |                     |                                                                 |     |
| 58 |                      |                     |                                                                 |     |
| 59 |                      |                     |                                                                 |     |
| 60 |                      |                     |                                                                 |     |

|    |                |                      |                                                               |      |
|----|----------------|----------------------|---------------------------------------------------------------|------|
| 1  | Bias           | <a href="#">#9</a>   | Describe any efforts to address potential sources of bias     | N/A  |
| 2  |                |                      |                                                               |      |
| 3  |                |                      |                                                               |      |
| 4  | Study size     | <a href="#">#10</a>  | Explain how the study size was arrived at                     | 7    |
| 5  |                |                      |                                                               |      |
| 6  |                |                      |                                                               |      |
| 7  | Quantitative   | <a href="#">#11</a>  | Explain how quantitative variables were handled in the        | 9-10 |
| 8  | variables      |                      | analyses. If applicable, describe which groupings were        |      |
| 9  |                |                      | chosen, and why                                               |      |
| 10 |                |                      |                                                               |      |
| 11 |                |                      |                                                               |      |
| 12 |                |                      |                                                               |      |
| 13 |                |                      |                                                               |      |
| 14 |                |                      |                                                               |      |
| 15 | Statistical    | <a href="#">#12a</a> | Describe all statistical methods, including those used to     | 9-10 |
| 16 | methods        |                      | control for confounding                                       |      |
| 17 |                |                      |                                                               |      |
| 18 |                |                      |                                                               |      |
| 19 |                |                      |                                                               |      |
| 20 | Statistical    | <a href="#">#12b</a> | Describe any methods used to examine subgroups and            | 9-10 |
| 21 | methods        |                      | interactions                                                  |      |
| 22 |                |                      |                                                               |      |
| 23 |                |                      |                                                               |      |
| 24 |                |                      |                                                               |      |
| 25 |                |                      |                                                               |      |
| 26 | Statistical    | <a href="#">#12c</a> | Explain how missing data were addressed                       | N/A  |
| 27 | methods        |                      |                                                               |      |
| 28 |                |                      |                                                               |      |
| 29 |                |                      |                                                               |      |
| 30 |                |                      |                                                               |      |
| 31 | Statistical    | <a href="#">#12d</a> | If applicable, describe analytical methods taking account of  | N/A  |
| 32 | methods        |                      | sampling strategy                                             |      |
| 33 |                |                      |                                                               |      |
| 34 |                |                      |                                                               |      |
| 35 |                |                      |                                                               |      |
| 36 | Statistical    | <a href="#">#12e</a> | Describe any sensitivity analyses                             | N/A  |
| 37 | methods        |                      |                                                               |      |
| 38 |                |                      |                                                               |      |
| 39 |                |                      |                                                               |      |
| 40 |                |                      |                                                               |      |
| 41 |                |                      |                                                               |      |
| 42 | <b>Results</b> |                      |                                                               |      |
| 43 |                |                      |                                                               |      |
| 44 |                |                      |                                                               |      |
| 45 | Participants   | <a href="#">#13a</a> | Report numbers of individuals at each stage of study—eg       | 10   |
| 46 |                |                      | numbers potentially eligible, examined for eligibility,       |      |
| 47 |                |                      | confirmed eligible, included in the study, completing follow- |      |
| 48 |                |                      | up, and analysed. Give information separately for for         |      |
| 49 |                |                      | exposed and unexposed groups if applicable.                   |      |
| 50 |                |                      |                                                               |      |
| 51 |                |                      |                                                               |      |
| 52 |                |                      |                                                               |      |
| 53 |                |                      |                                                               |      |
| 54 |                |                      |                                                               |      |
| 55 |                |                      |                                                               |      |
| 56 |                |                      |                                                               |      |
| 57 | Participants   | <a href="#">#13b</a> | Give reasons for non-participation at each stage              | N/A  |
| 58 |                |                      |                                                               |      |
| 59 |                |                      |                                                               |      |
| 60 |                |                      |                                                               |      |

|    |                   |                      |                                                                   |       |
|----|-------------------|----------------------|-------------------------------------------------------------------|-------|
| 1  | Participants      | <a href="#">#13c</a> | Consider use of a flow diagram                                    | N/A   |
| 2  |                   |                      |                                                                   |       |
| 3  |                   |                      |                                                                   |       |
| 4  | Descriptive data  | <a href="#">#14a</a> | Give characteristics of study participants (eg demographic,       | 12    |
| 5  |                   |                      | clinical, social) and information on exposures and potential      |       |
| 6  |                   |                      | confounders. Give information separately for exposed and          |       |
| 7  |                   |                      | unexposed groups if applicable.                                   |       |
| 8  |                   |                      |                                                                   |       |
| 9  |                   |                      |                                                                   |       |
| 10 |                   |                      |                                                                   |       |
| 11 |                   |                      |                                                                   |       |
| 12 |                   |                      |                                                                   |       |
| 13 |                   |                      |                                                                   |       |
| 14 | Descriptive data  | <a href="#">#14b</a> | Indicate number of participants with missing data for each        | N/A   |
| 15 |                   |                      | variable of interest                                              |       |
| 16 |                   |                      |                                                                   |       |
| 17 |                   |                      |                                                                   |       |
| 18 |                   |                      |                                                                   |       |
| 19 | Outcome data      | <a href="#">#15</a>  | Report numbers of outcome events or summary measures.             | 13-21 |
| 20 |                   |                      | Give information separately for exposed and unexposed             |       |
| 21 |                   |                      | groups if applicable.                                             |       |
| 22 |                   |                      |                                                                   |       |
| 23 |                   |                      |                                                                   |       |
| 24 |                   |                      |                                                                   |       |
| 25 |                   |                      |                                                                   |       |
| 26 |                   |                      |                                                                   |       |
| 27 | Main results      | <a href="#">#16a</a> | Give unadjusted estimates and, if applicable, confounder-         | 13-21 |
| 28 |                   |                      | adjusted estimates and their precision (eg, 95% confidence        |       |
| 29 |                   |                      | interval). Make clear which confounders were adjusted for         |       |
| 30 |                   |                      | and why they were included                                        |       |
| 31 |                   |                      |                                                                   |       |
| 32 |                   |                      |                                                                   |       |
| 33 |                   |                      |                                                                   |       |
| 34 |                   |                      |                                                                   |       |
| 35 |                   |                      |                                                                   |       |
| 36 |                   |                      |                                                                   |       |
| 37 | Main results      | <a href="#">#16b</a> | Report category boundaries when continuous variables were         | 9-10  |
| 38 |                   |                      | categorized                                                       |       |
| 39 |                   |                      |                                                                   |       |
| 40 |                   |                      |                                                                   |       |
| 41 |                   |                      |                                                                   |       |
| 42 | Main results      | <a href="#">#16c</a> | If relevant, consider translating estimates of relative risk into | N/A   |
| 43 |                   |                      | absolute risk for a meaningful time period                        |       |
| 44 |                   |                      |                                                                   |       |
| 45 |                   |                      |                                                                   |       |
| 46 |                   |                      |                                                                   |       |
| 47 |                   |                      |                                                                   |       |
| 48 | Other analyses    | <a href="#">#17</a>  | Report other analyses done—e.g., analyses of subgroups            | N/A   |
| 49 |                   |                      | and interactions, and sensitivity analyses                        |       |
| 50 |                   |                      |                                                                   |       |
| 51 |                   |                      |                                                                   |       |
| 52 |                   |                      |                                                                   |       |
| 53 | <b>Discussion</b> |                      |                                                                   |       |
| 54 |                   |                      |                                                                   |       |
| 55 |                   |                      |                                                                   |       |
| 56 | Key results       | <a href="#">#18</a>  | Summarise key results with reference to study objectives          | 22-24 |
| 57 |                   |                      |                                                                   |       |
| 58 |                   |                      |                                                                   |       |
| 59 |                   |                      |                                                                   |       |
| 60 |                   |                      |                                                                   |       |

|    |                          |                     |                                                                |       |
|----|--------------------------|---------------------|----------------------------------------------------------------|-------|
| 1  | Limitations              | <a href="#">#19</a> | Discuss limitations of the study, taking into account sources  | 24-25 |
| 2  |                          |                     | of potential bias or imprecision. Discuss both direction and   |       |
| 3  |                          |                     | magnitude of any potential bias.                               |       |
| 4  |                          |                     |                                                                |       |
| 5  |                          |                     |                                                                |       |
| 6  |                          |                     |                                                                |       |
| 7  |                          |                     |                                                                |       |
| 8  |                          |                     |                                                                |       |
| 9  | Interpretation           | <a href="#">#20</a> | Give a cautious overall interpretation considering objectives, | 22-24 |
| 10 |                          |                     | limitations, multiplicity of analyses, results from similar    |       |
| 11 |                          |                     | studies, and other relevant evidence.                          |       |
| 12 |                          |                     |                                                                |       |
| 13 |                          |                     |                                                                |       |
| 14 |                          |                     |                                                                |       |
| 15 |                          |                     |                                                                |       |
| 16 | Generalisability         | <a href="#">#21</a> | Discuss the generalisability (external validity) of the study  | 25-26 |
| 17 |                          |                     | results.                                                       |       |
| 18 |                          |                     |                                                                |       |
| 19 |                          |                     |                                                                |       |
| 20 |                          |                     |                                                                |       |
| 21 |                          |                     |                                                                |       |
| 22 | <b>Other Information</b> |                     |                                                                |       |
| 23 |                          |                     |                                                                |       |
| 24 |                          |                     |                                                                |       |
| 25 | Funding                  | <a href="#">#22</a> | Give the source of funding and the role of the funders for the | 27    |
| 26 |                          |                     | present study and, if applicable, for the original study on    |       |
| 27 |                          |                     | which the present article is based                             |       |
| 28 |                          |                     |                                                                |       |
| 29 |                          |                     |                                                                |       |
| 30 |                          |                     |                                                                |       |
| 31 |                          |                     |                                                                |       |
| 32 |                          |                     |                                                                |       |

33 None The STROBE checklist is distributed under the terms of the Creative Commons Attribution  
34 License CC-BY. This checklist can be completed online using <https://www.goodreports.org/>, a tool  
35 made by the [EQUATOR Network](#) in collaboration with [Penelope.ai](#)  
36  
37  
38  
39  
40  
41  
42  
43  
44  
45  
46  
47  
48  
49  
50  
51  
52  
53  
54  
55  
56  
57  
58  
59  
60
