# Supplementary material for: Public perceptions of brain health: an international, online cross-sectional survey
Source: PubMed Central journal article supplement — BMJ Open. 2022 Apr 18;12(4):e057999. doi: 10.1136/bmjopen-2021-057999 (PMC9016409; doi:10.1136/bmjopen-2021-057999), 2022-04-18
Supplement: bmjopen-2021-057999supp002.pdf [file bmjopen-2021-057999supp002.pdf]

# Lifebrain Global Brain Health Survey

for country: all

## Contents

|          |                                            |           |
|----------|--------------------------------------------|-----------|
| <b>1</b> | <b>Question 1</b>                          | <b>2</b>  |
| 1.1      | Overall . . . . .                          | 2         |
| 1.2      | Gender . . . . .                           | 3         |
| 1.3      | Age groups . . . . .                       | 4         |
| 1.4      | Education . . . . .                        | 5         |
| 1.5      | Country . . . . .                          | 6         |
| 1.6      | Health experience/education . . . . .      | 7         |
| 1.7      | Cognitive health . . . . .                 | 8         |
| 1.8      | Mental health . . . . .                    | 9         |
| 1.9      | Illness . . . . .                          | 10        |
| 1.10     | Brain disease care . . . . .               | 11        |
| 1.11     | Research participation . . . . .           | 12        |
| <br>     |                                            |           |
| <b>2</b> | <b>Question 2</b>                          | <b>13</b> |
| 2.1      | Overall . . . . .                          | 13        |
| 2.2      | Gender . . . . .                           | 13        |
| 2.3      | Age groups . . . . .                       | 14        |
| 2.4      | Education . . . . .                        | 14        |
| 2.5      | Country . . . . .                          | 15        |
| 2.6      | Health experience/education . . . . .      | 16        |
| 2.7      | Cognitive health . . . . .                 | 17        |
| 2.8      | Mental health . . . . .                    | 17        |
| 2.9      | Illness . . . . .                          | 18        |
| 2.10     | Brain disease care . . . . .               | 18        |
| 2.11     | Research participation . . . . .           | 19        |
| <br>     |                                            |           |
| <b>3</b> | <b>Question 3</b>                          | <b>20</b> |
| 3.1      | Overall . . . . .                          | 20        |
| 3.2      | Gender . . . . .                           | 21        |
| 3.3      | Age groups . . . . .                       | 22        |
| 3.4      | Education . . . . .                        | 23        |
| 3.5      | Country . . . . .                          | 24        |
| 3.6      | Health care experience/education . . . . . | 25        |
| 3.7      | Cognitive health . . . . .                 | 26        |
| 3.8      | Mental health . . . . .                    | 27        |
| 3.9      | Illness . . . . .                          | 28        |
| 3.10     | Brain disease care . . . . .               | 29        |
| 3.11     | Research participation . . . . .           | 30        |

# 1 Question 1

## 1.1 Overall

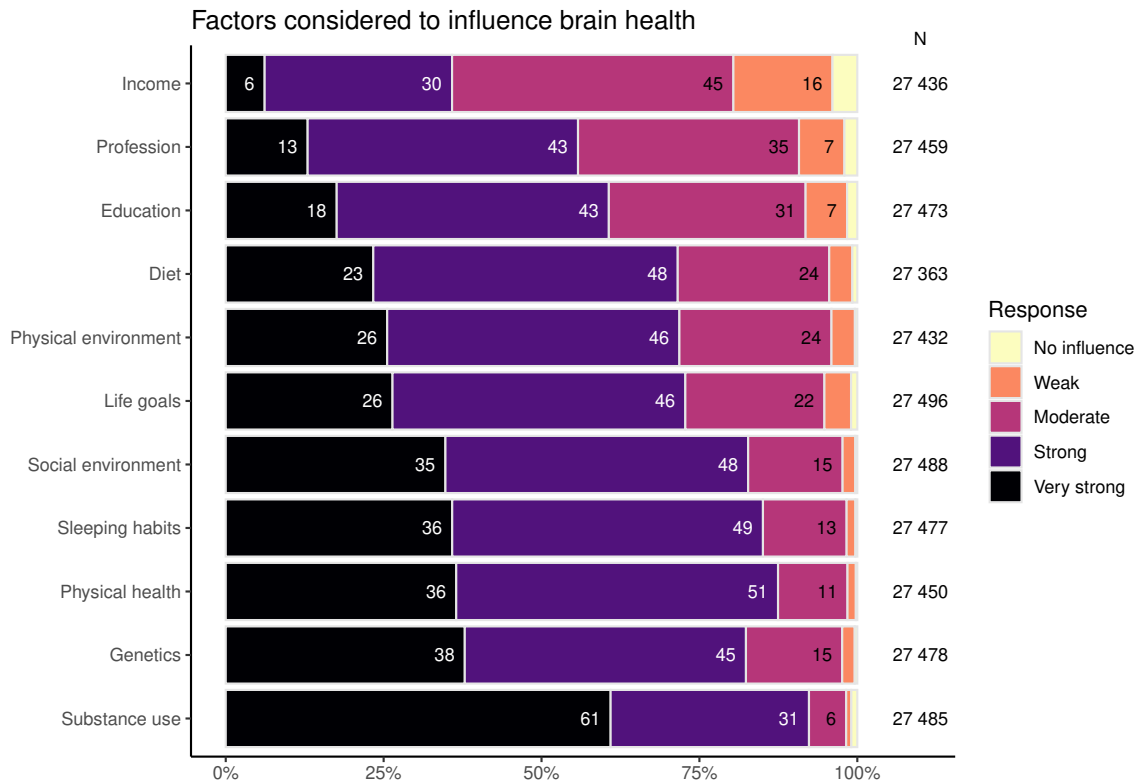

## 1.2 Gender

### Factors considered to influence brain health by gender

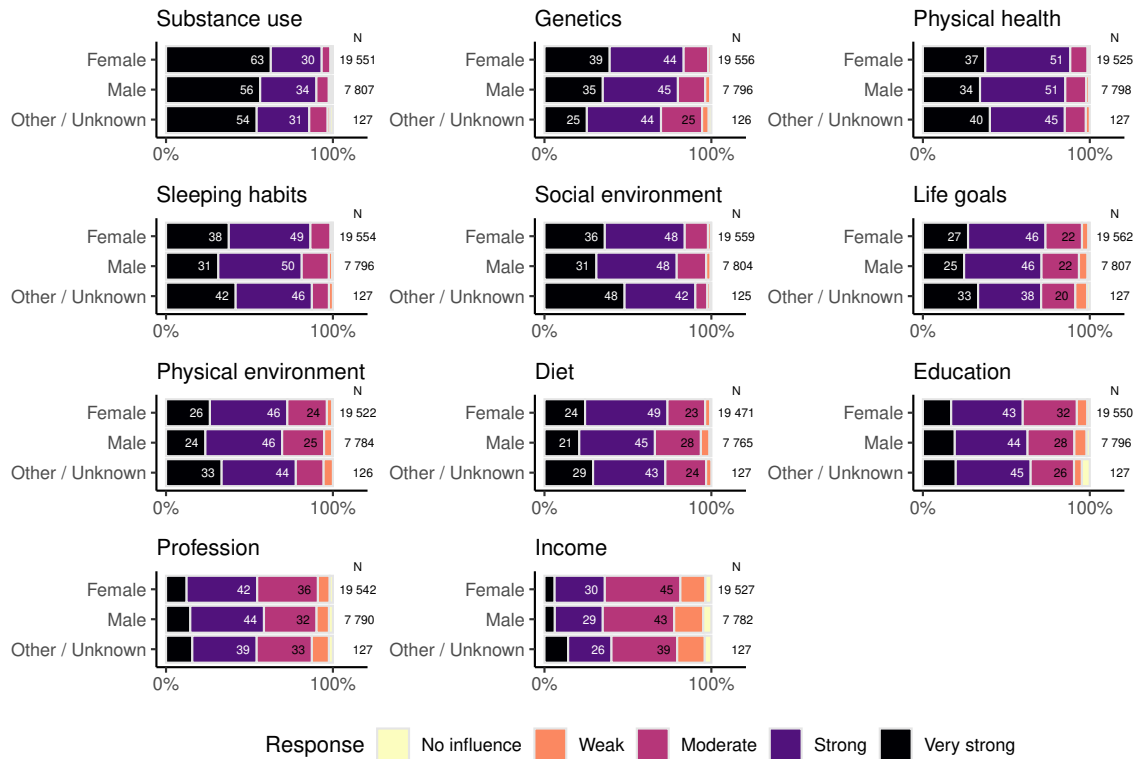

Question 1 asked respondents to rate on a 5-level likert-scale how strongly different life periods influence brain health. Here divided by respondent gender. Categories with less than 20% of the responses do not have percentages shown. Subplots are ordered by total rated importance across all groups. The number of male and female respondents differ between subplots due to missing answers.

### 1.3 Age groups

Factors considered to influence brain health  
by age groups

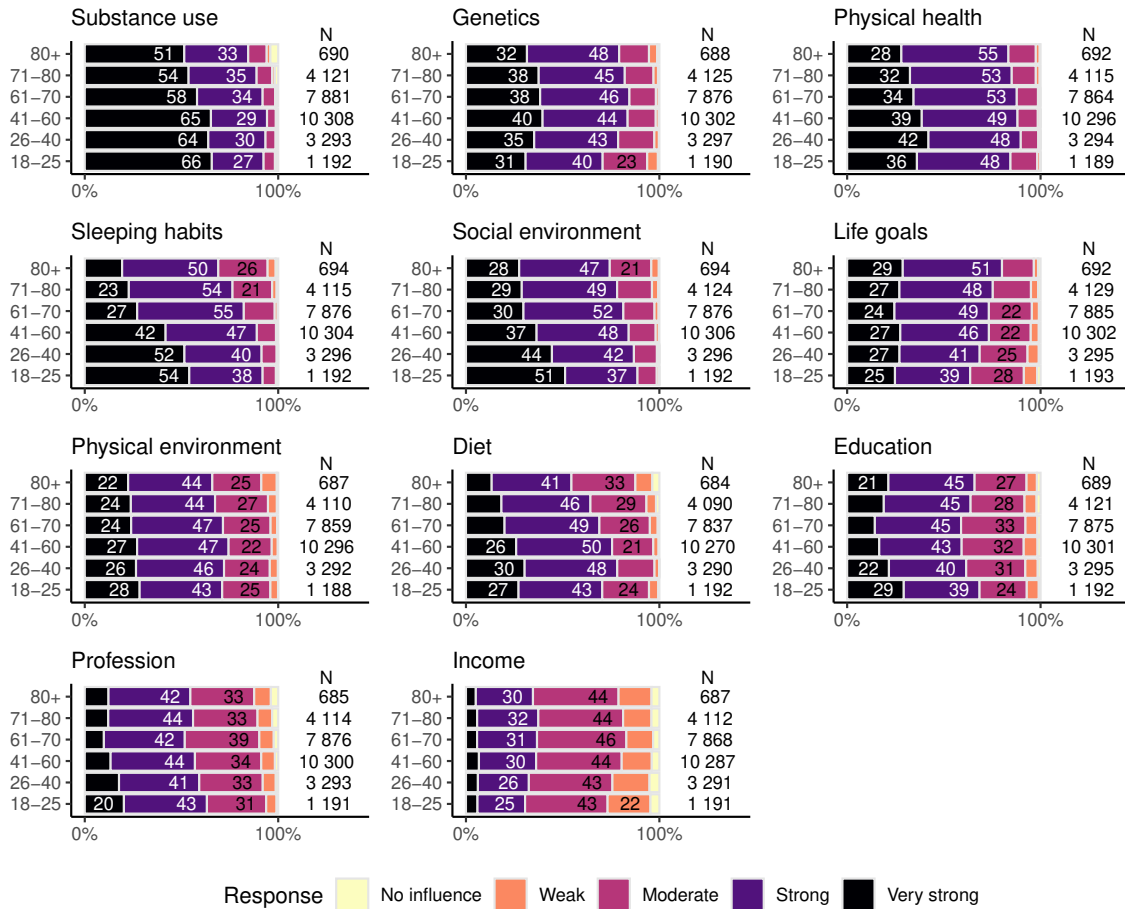

Question 1 asked respondents to rate on a 5-level likert-scale how strongly different life periods influence brain health. Here divided by respondent age group. Categories with less than 20% of the responses do not have percentages shown. Subplots are ordered by total rated importance across all groups

### 1.4 Education

Factors considered to influence brain health by educational level

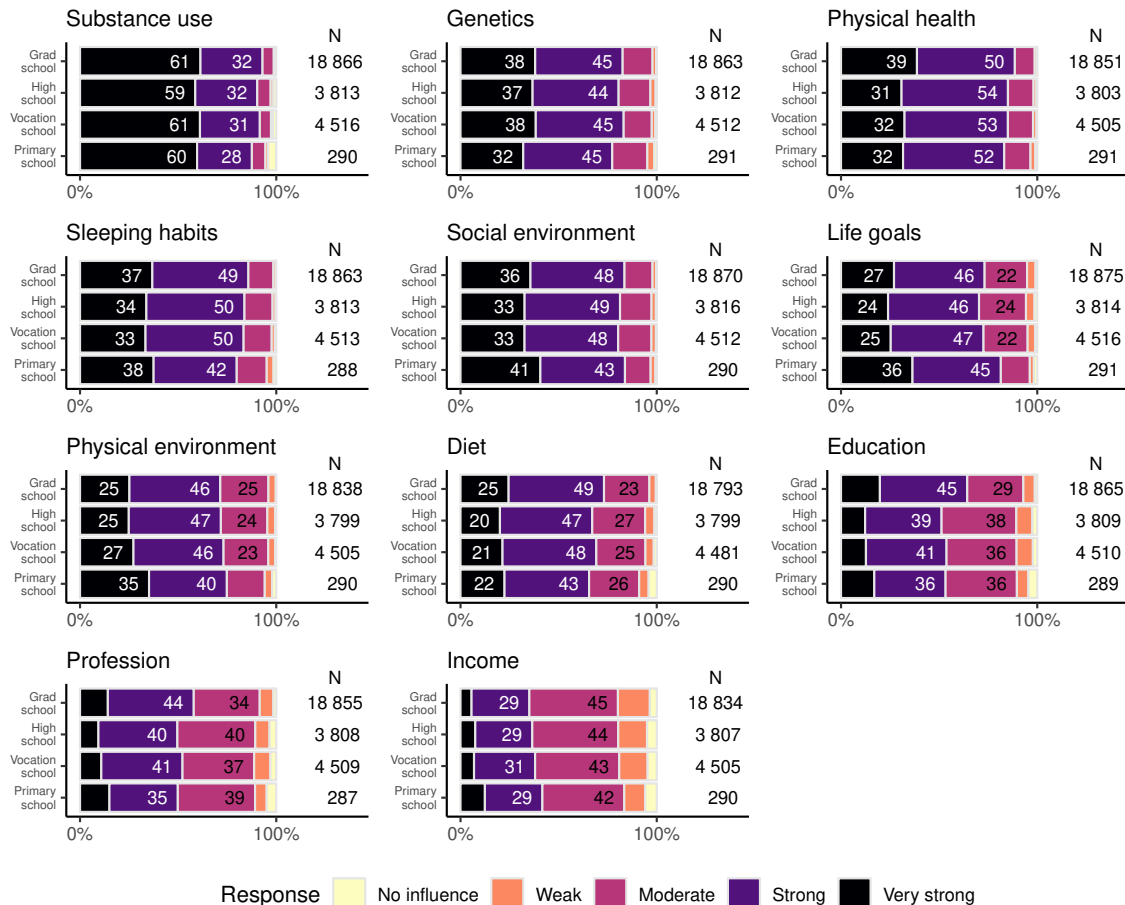

Question 1 asked respondents to rate on a 5-level likert-scale how strongly different life periods influence brain health. Here divided by respondent self-reported education level. Categories with less than 20% of the responses do not have percentages shown. Subplots are ordered by total rated importance across all groups

### 1.5 Country

Factors considered to influence brain health  
by country of residence

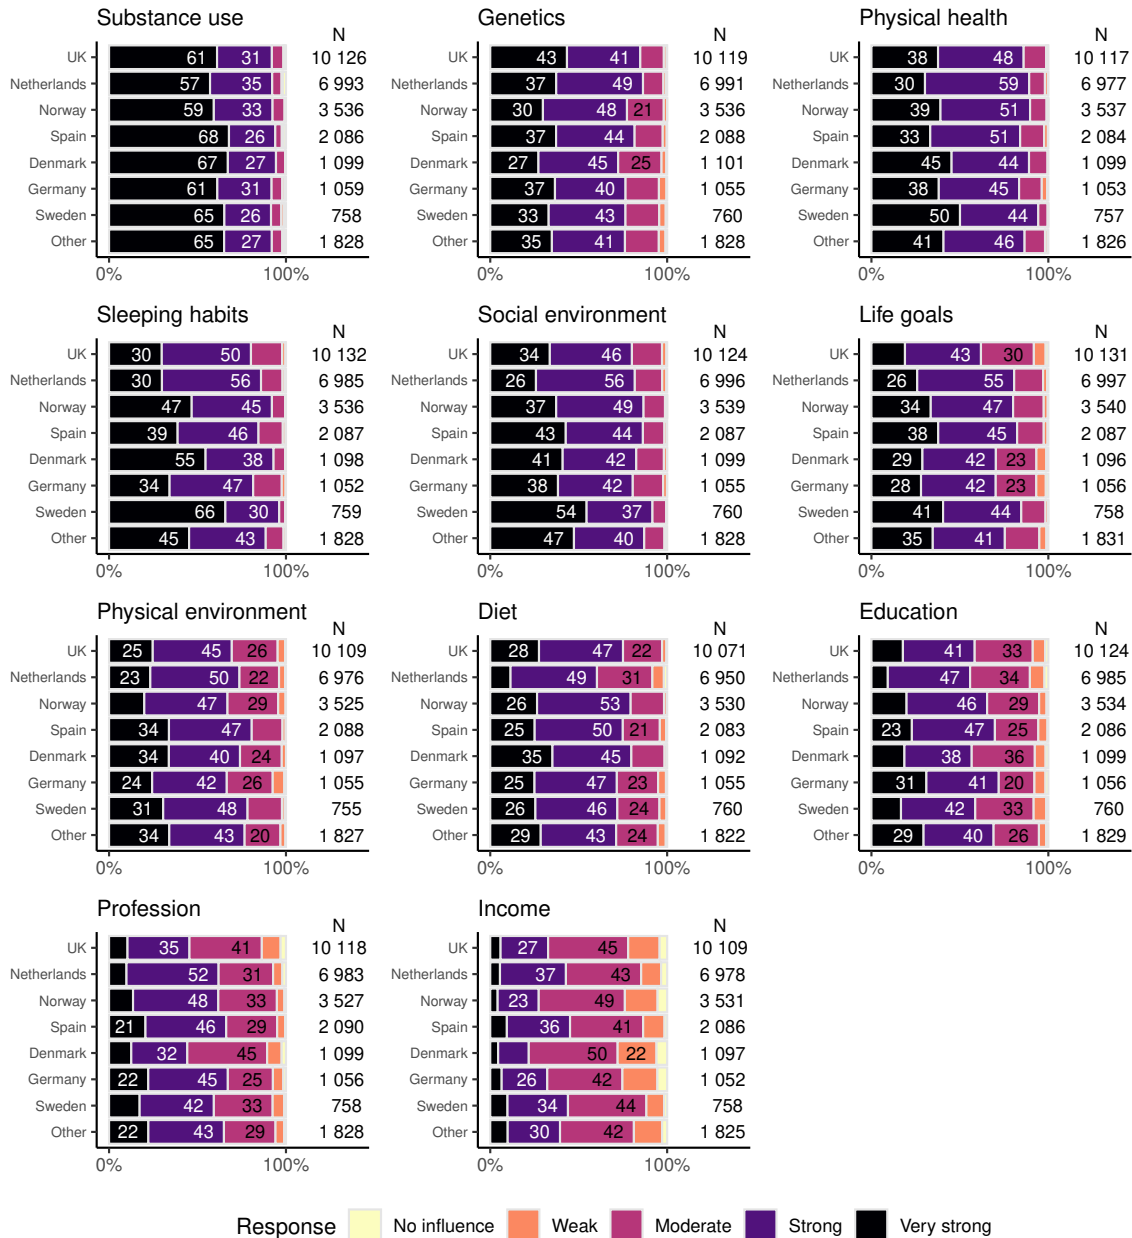

Question 1 asked respondents to rate on a 5-level likert-scale how strongly different life periods influence brain health. Here divided by respondent self-reported country of residence, showing the 7 with the most responses while all other countries are represented in 'Other'. Categories with less than 20% of the responses do not have percentages shown. Subplots are ordered by total rated importance across all groups

### 1.6 Health experience/education

#### Factors considered to influence brain health

By reported education or work experience in health care

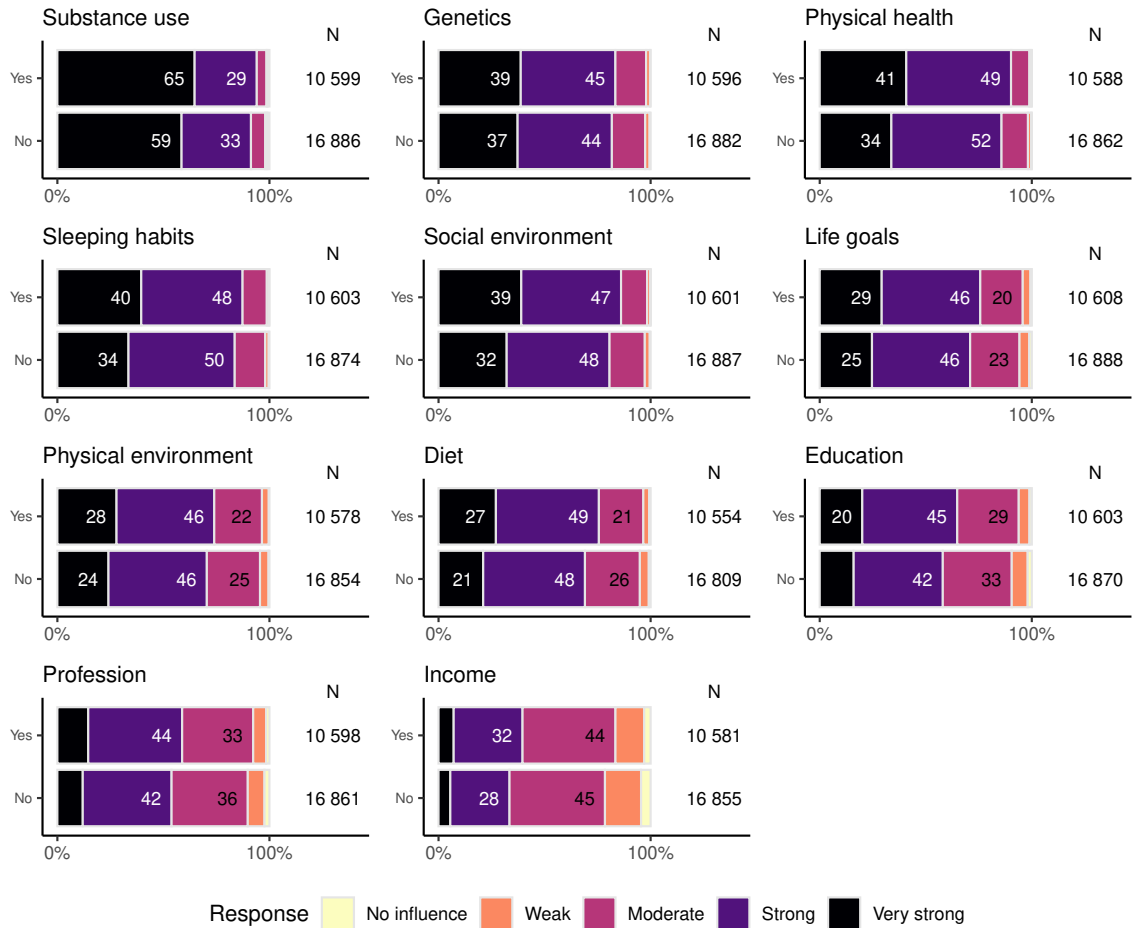

Question 1 asked respondents to rate on a 5-level likert-scale how strongly different life periods influence brain health. Here divided by having education or work experience in health care. Categories with less than 20% of the responses do not have percentages shown.

### 1.7 Cognitive health

Factors considered to influence brain health  
by self-reported rating of cognitive health

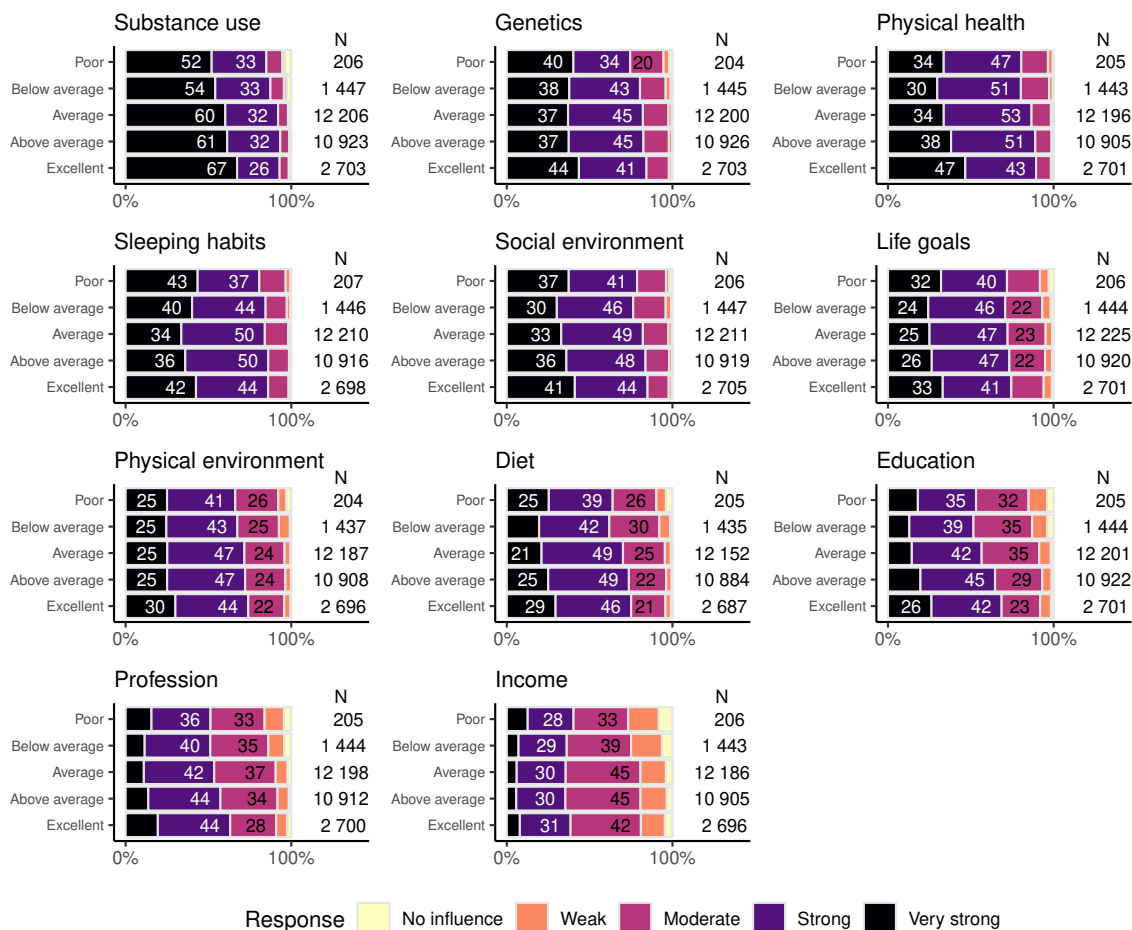

Question 1 asked respondents to rate on a 5-level likert-scale how strongly different life periods influence brain health. Here divided by self-reported rating of cognitive health. Categories with less than 20% of the responses do not have percentages shown.



### 1.8 Mental health

Factors considered to influence brain health by self-reported rating of mental health

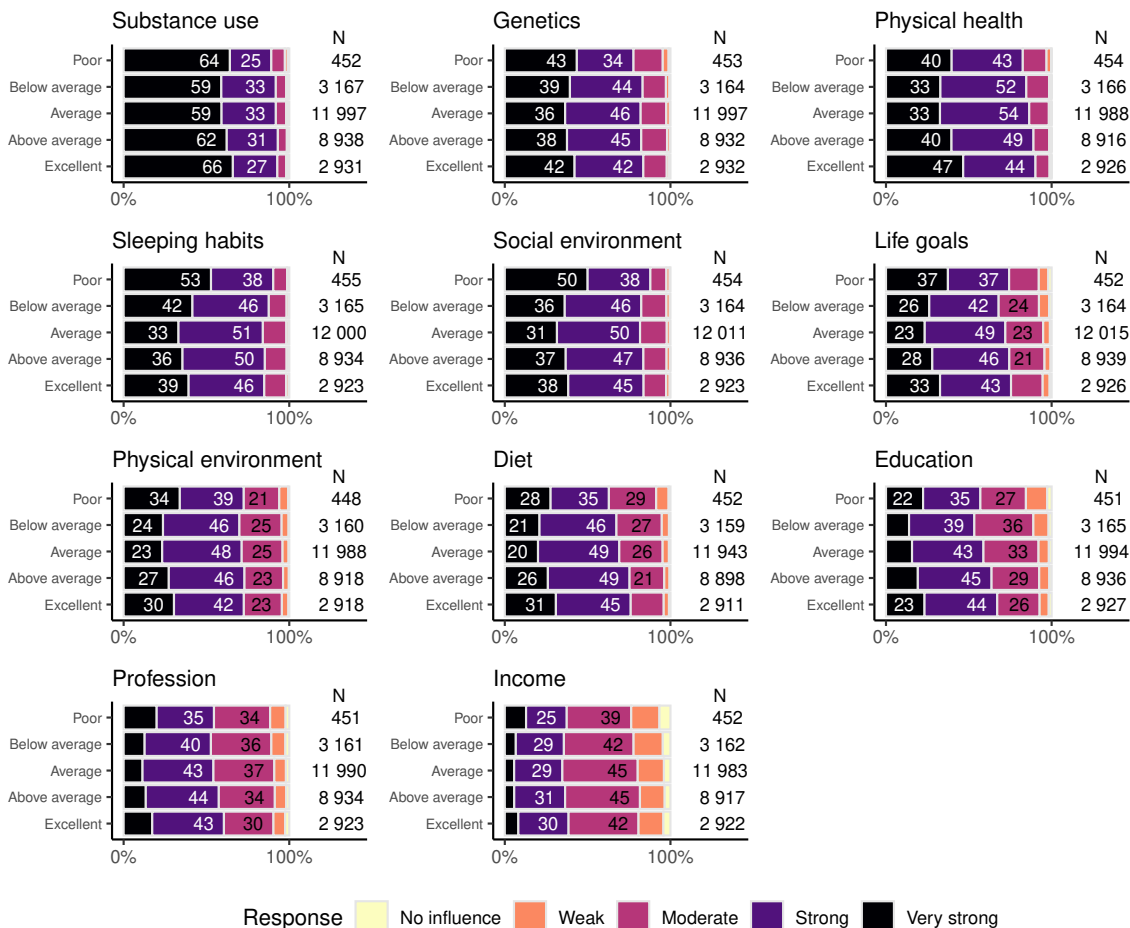

Question 1 asked respondents to rate on a 5-level likert-scale how strongly different life periods influence brain health. Here divided by self-reported rating of mental health. Categories with less than 20% of the responses do not have percentages shown.

### 1.9 Illness

#### Factors considered to influence brain health

by experience of long-standing illness, disability, or health problem

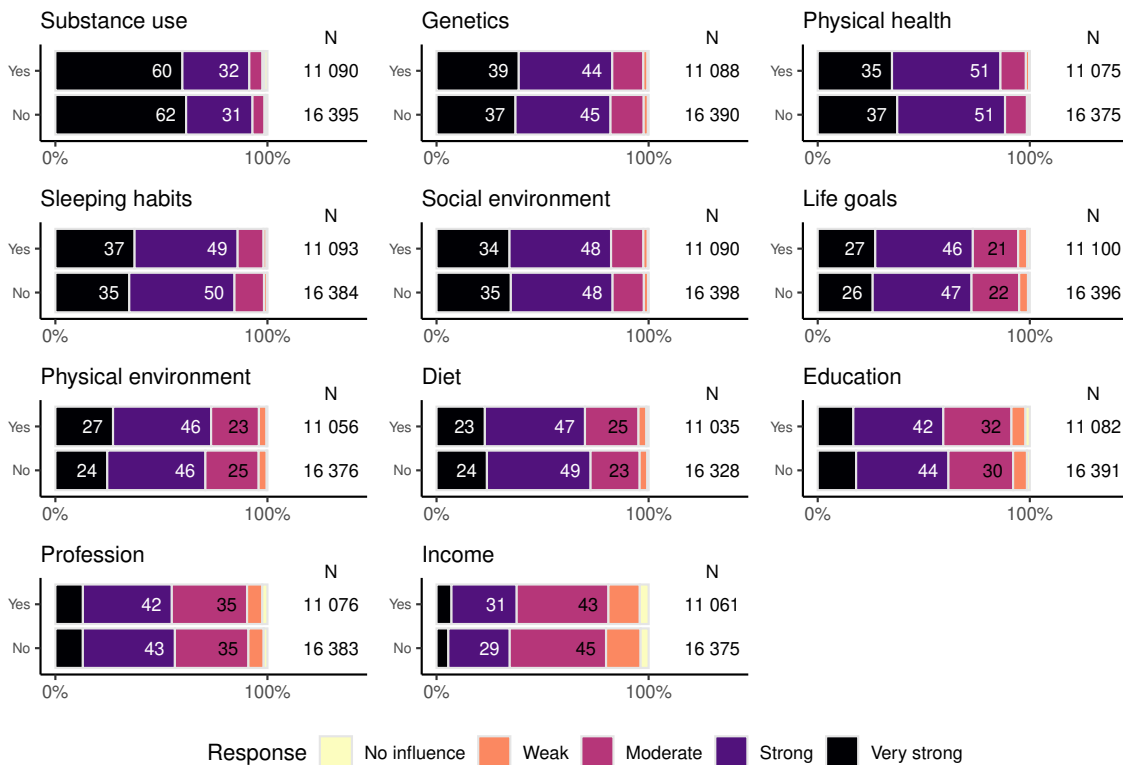

Question 1 asked respondents to rate on a 5-level likert-scale how strongly different life periods influence brain health. Here divided whether they had experience with long-standing illness, disability, or health problem. Categories with less than 20% of the responses do not have percentages shown.

## 1.10 Brain disease care

### Factors considered to influence brain health

by experience of taking care of family member with brain disease

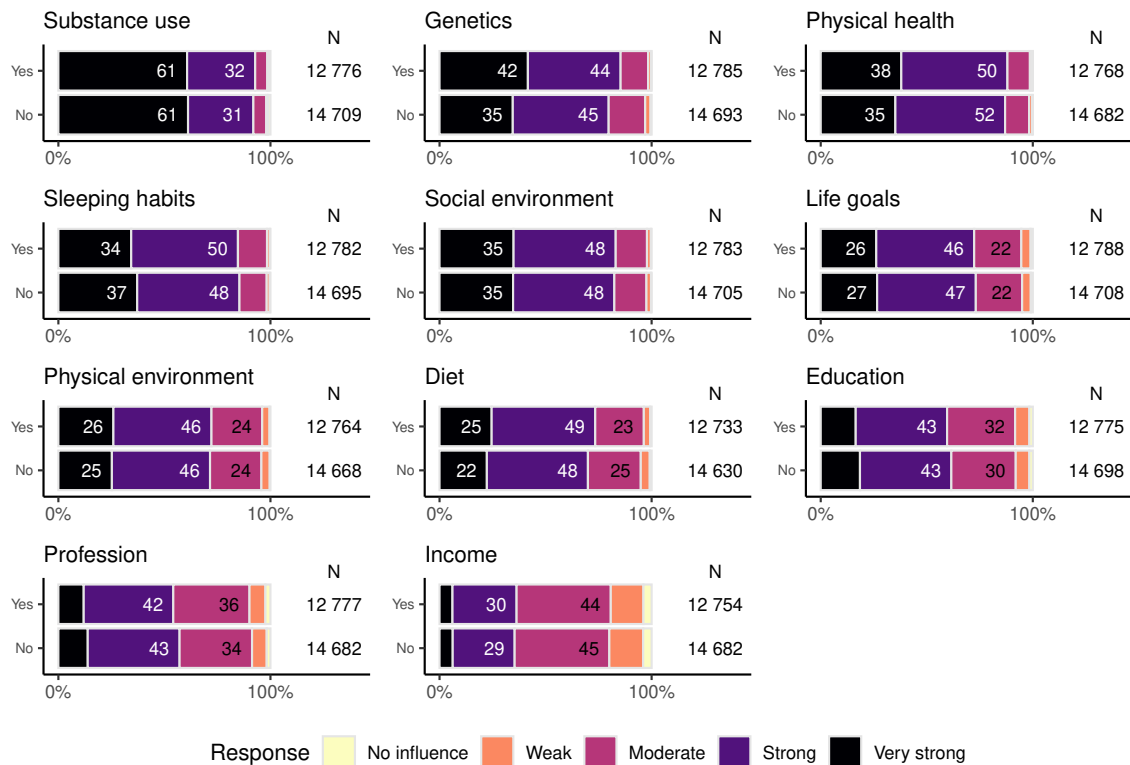

Question 1 asked respondents to rate on a 5-level likert-scale how strongly different life periods influence brain health. Here divided whether they had experience with looking after a member of family with brain disease. Categories with less than 20% of the responses do not have percentages shown.

### 1.11 Research participation

#### Factors considered to influence brain health

By experience of brain research participation

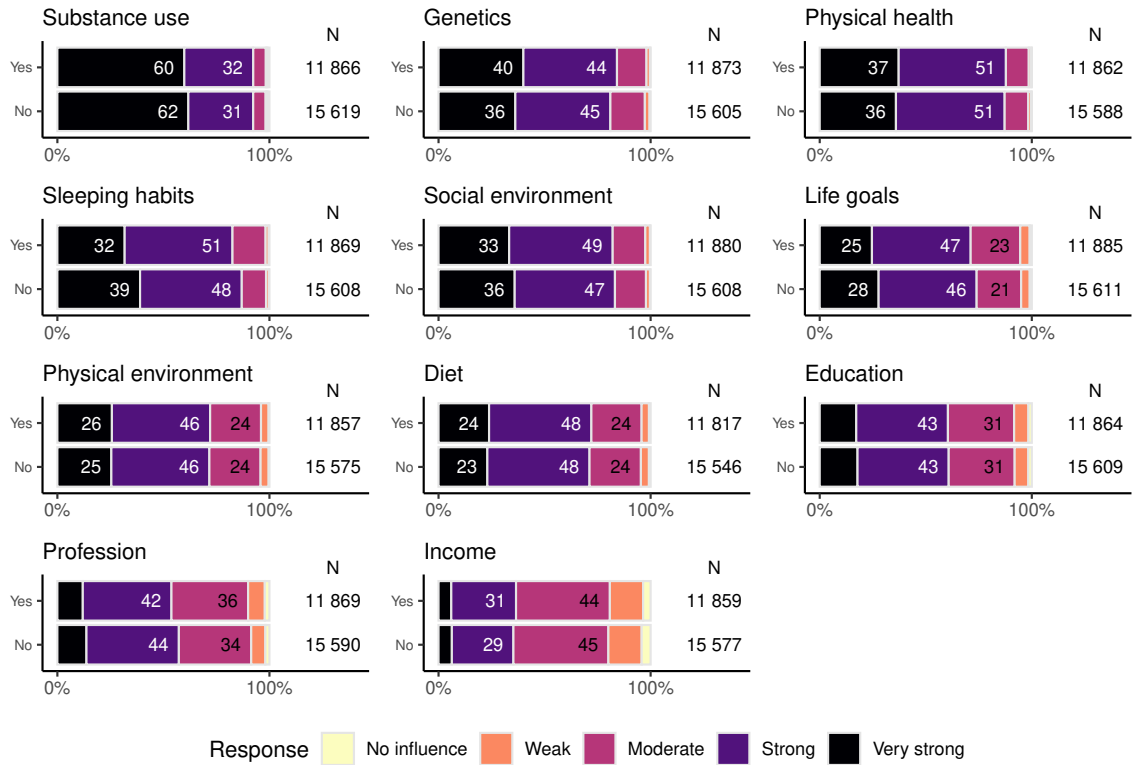

Question 1 asked respondents to rate on a 5-level likert-scale how strongly different life periods influence brain health. Here divided whether they have participated in brain research projects. Categories with less than 20% of the responses do not have percentages shown.

## 2 Question 2

### 2.1 Overall

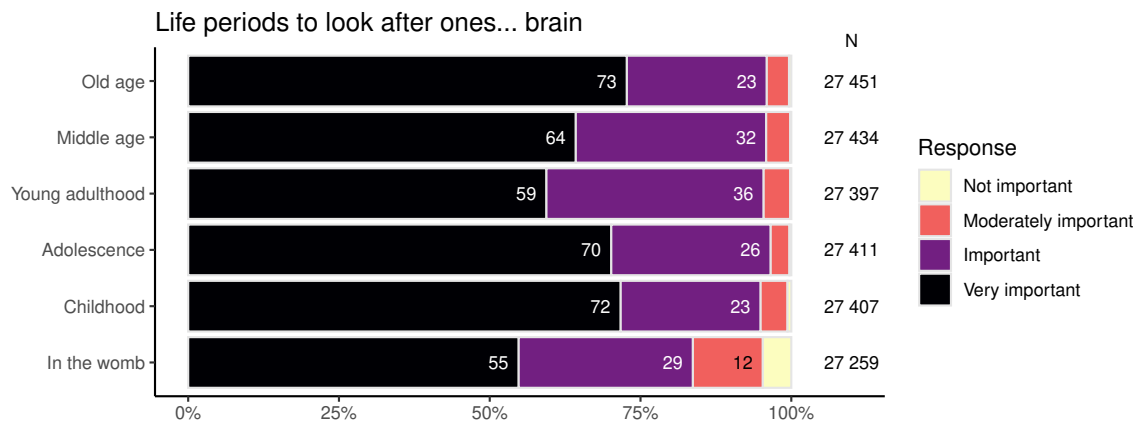

### 2.2 Gender

Life periods to look after ones... brain  
by gender

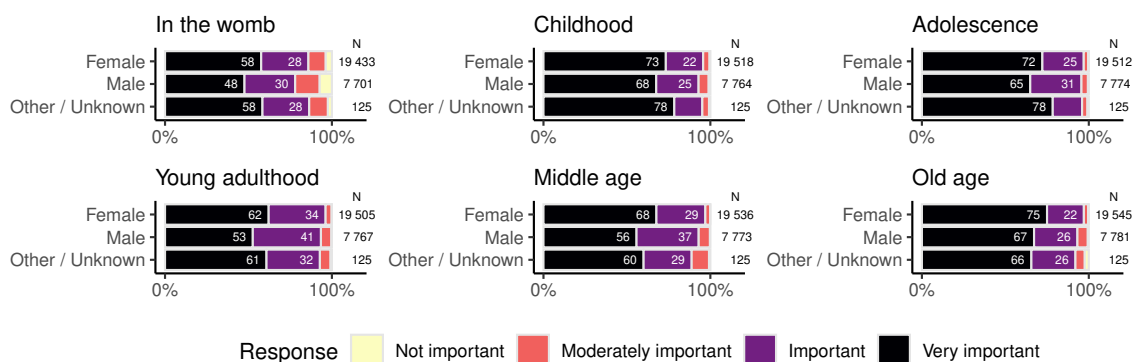

Question 2 asked respondents to rate on a 4...level scale at which life stages it is important to look after one's brain health. In the womb (before birth); Childhood (0–12 years); Adolescence (13–18 years); Young adulthood (19...45 years); Middle age (45–65 years); Old age (over 65 years) Here divided by respondent gender. Categories with less than 20% of the responses do not have percentages shown. Subplots are ordered by total rated importance across all groups. The number of male and female respondents differ between subplots due to missing answers.

### 2.3 Age groups

Life periods to look after ones... brain  
by age groups

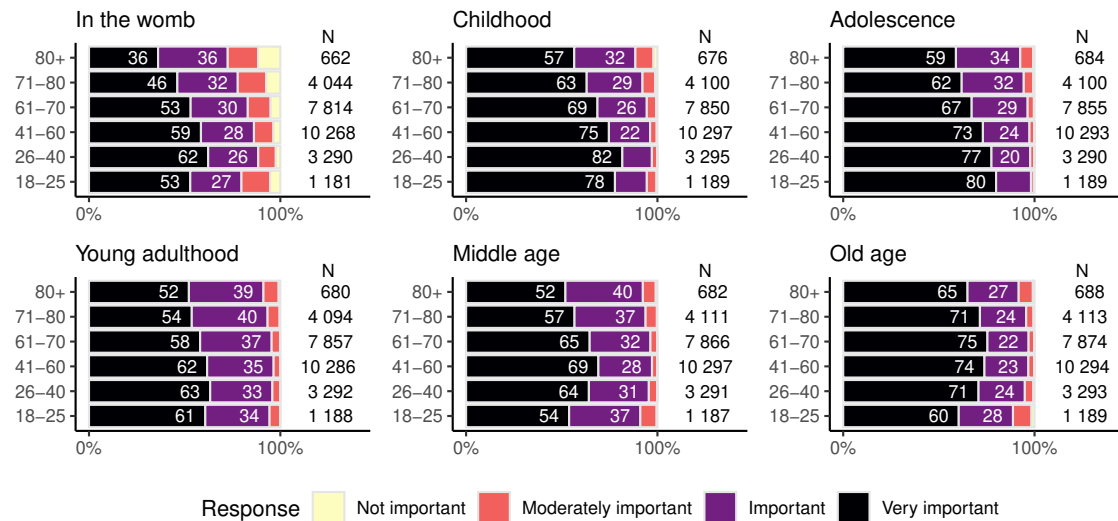

Question 2 asked respondents to rate on a 4...level scale at which life stages it is important to look after one's brain health. In the womb (before birth); Childhood (0-12 years); Adolescence (13-18 years); Young adulthood (19...45 years); Middle age (45-65 years); Old age (over 65 years) Here divided by respondent age group. Categories with less than 20% of the responses do not have percentages shown. Subplots are ordered by total rated importance across all groups

### 2.4 Education

Life periods to look after ones... brain  
by educational level

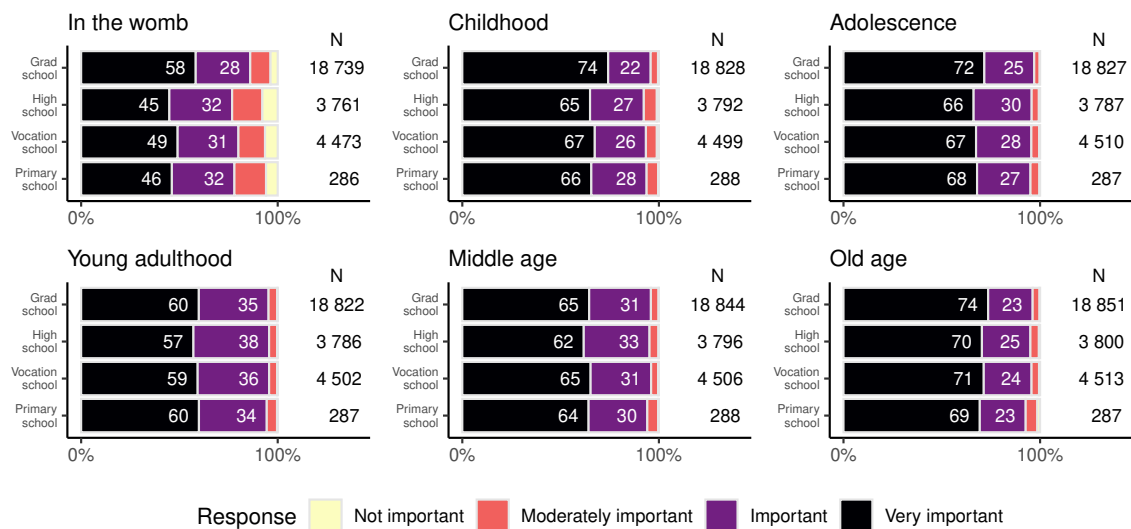

Question 2 asked respondents to rate on a 4...level scale at which life stages it is important to look after one's brain health. In the womb (before birth); Childhood (0-12 years); Adolescence (13-18 years); Young adulthood (19...45 years); Middle age (45-65 years); Old age (over 65 years) Here divided by respondent self-reported educational level. Categories with less than 20% of the responses do not have percentages shown. Subplots are ordered by total rated importance across all groups

## 2.5 Country

### Life periods to look after ones... brain by country of residence

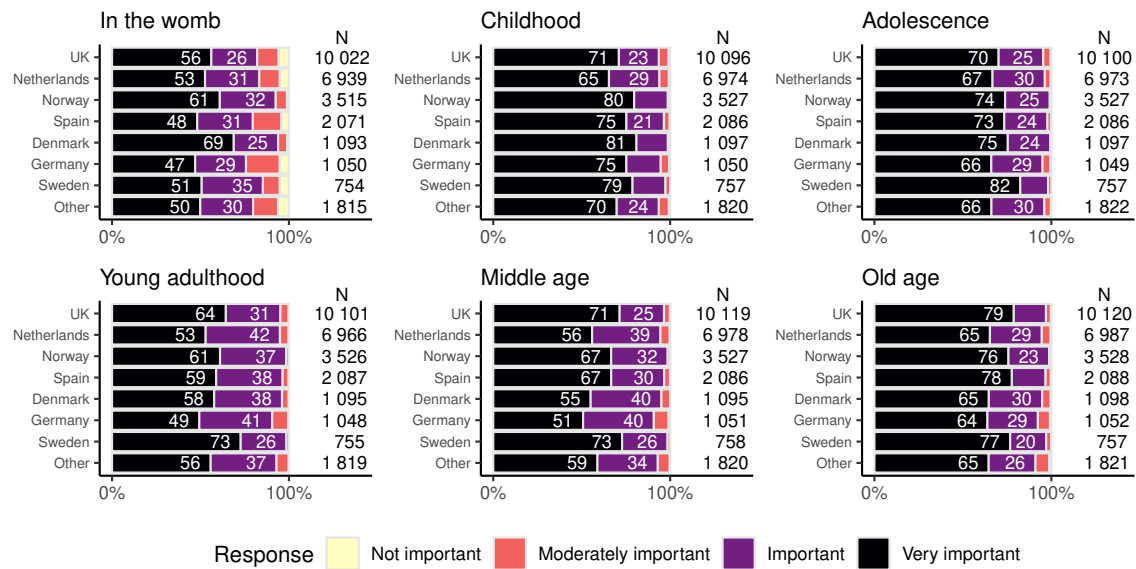

Question 2 asked respondents to rate on a 4...level scale at which life stages it is important to look after one's brain health. In the womb (before birth); Childhood (0–12 years); Adolescence (13–18 years); Young adulthood (19...45 years); Middle age (45–65 years); Old age (over 65 years) Here divided by respondent self-reported country of residence, showing the 7 with the most responses while all other countries are represented in 'Other'. Categories with less than 20% of the responses do not have percentages shown. Subplots are ordered by total rated importance across all groups

## 2.6 Health experience/education

### Life periods to look after ones... brain

By reported education or work experience in health care

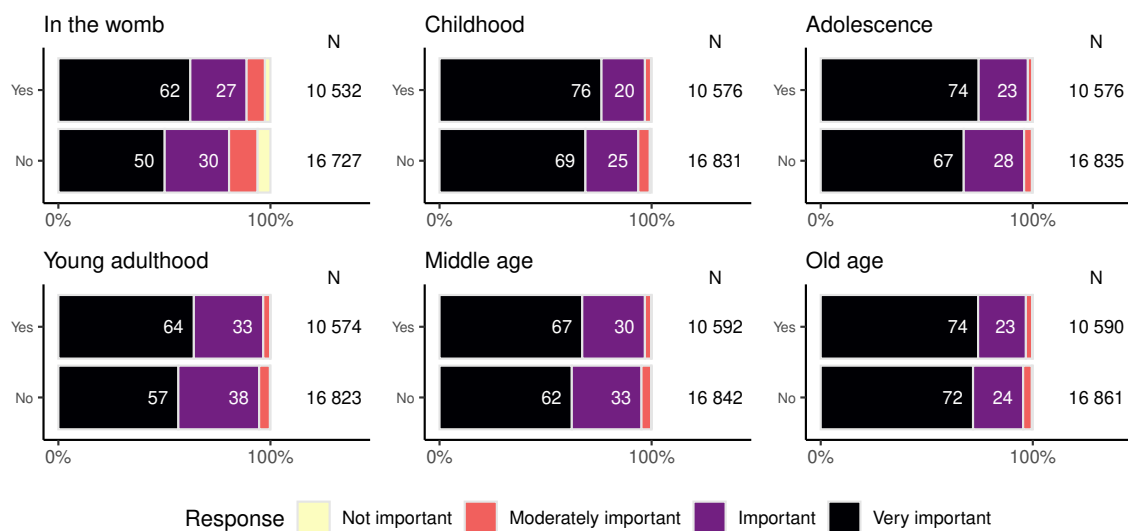

Question 2 asked respondents to rate on a 4...level scale at which life stages it is important to look after one's brain health. In the womb (before birth); Childhood (0–12 years); Adolescence (13–18 years); Young adulthood (19...45 years); Middle age (45–65 years); Old age (over 65 years) Here divided by having education or work experience in health care. Categories with less than 20% of the responses do not have percentages shown.



## 2.7 Cognitive health

Life periods to look after ones... brain  
by self-reported rating of cognitive health

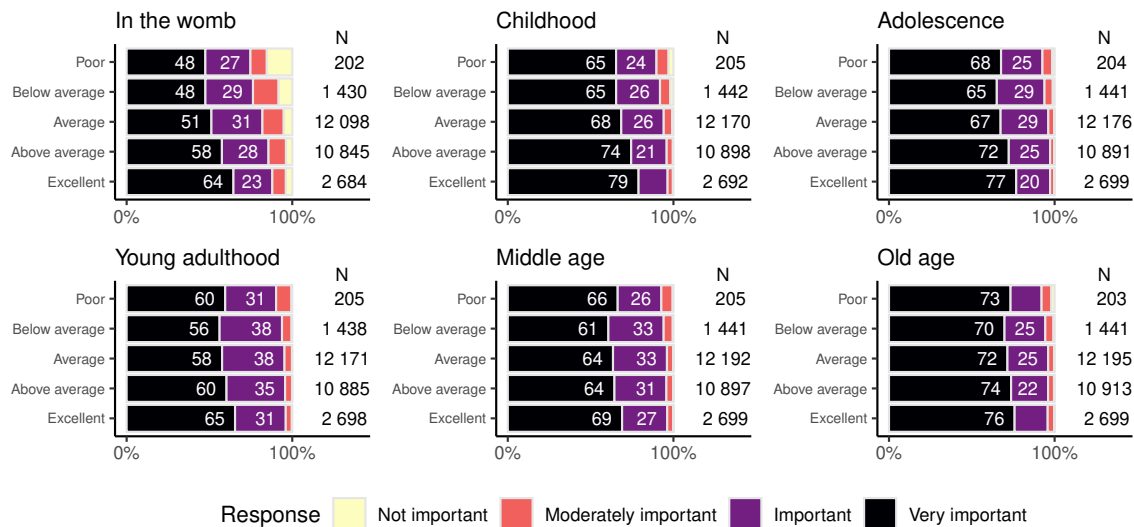

Question 2 asked respondents to rate on a 4...level scale at which life stages it is important to look after one's brain health. In the womb (before birth); Childhood (0–12 years); Adolescence (13–18 years); Young adulthood (19...45 years); Middle age (45–65 years); Old age (over 65 years) Here divided by self-reported rating of cognitive health. Categories with less than 20% of the responses do not have percentages shown.

## 2.8 Mental health

Life periods to look after ones... brain  
by self-reported rating of mental health

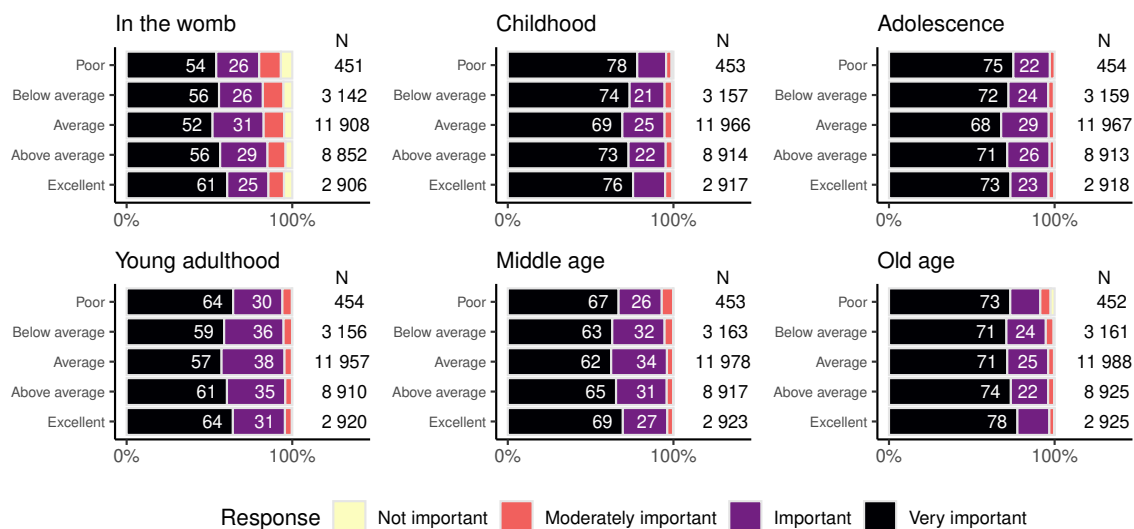

Question 2 asked respondents to rate on a 4...level scale at which life stages it is important to look after one's brain health. In the womb (before birth); Childhood (0–12 years); Adolescence (13–18 years); Young adulthood (19...45 years); Middle age (45–65 years); Old age (over 65 years) Here divided by self-reported rating of mental health. Categories with less than 20% of the responses do not have percentages shown.

## 2.9 Illness

### Life periods to look after ones... brain

by experience of long-standing illness, disability, or health problem

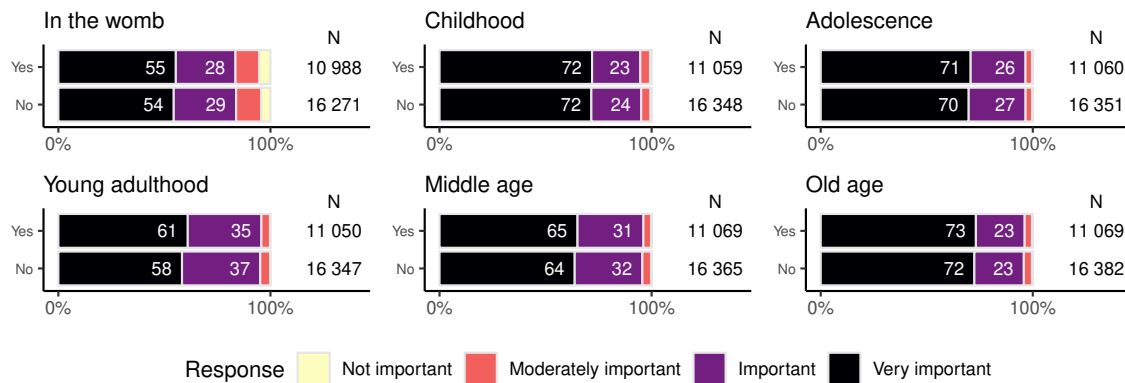

Question 2 asked respondents to rate on a 4...level scale at which life stages it is important to look after one's brain health. In the womb (before birth); Childhood (0–12 years); Adolescence (13–18 years); Young adulthood (19...45 years); Middle age (45–65 years); Old age (over 65 years) Here divided whether they had experience with long-standing illness, disability, or health problem. Categories with less than 20% of the responses do not have percentages shown.

## 2.10 Brain disease care

### Life periods to look after ones... brain

by experience of taking care of family member with brain disease

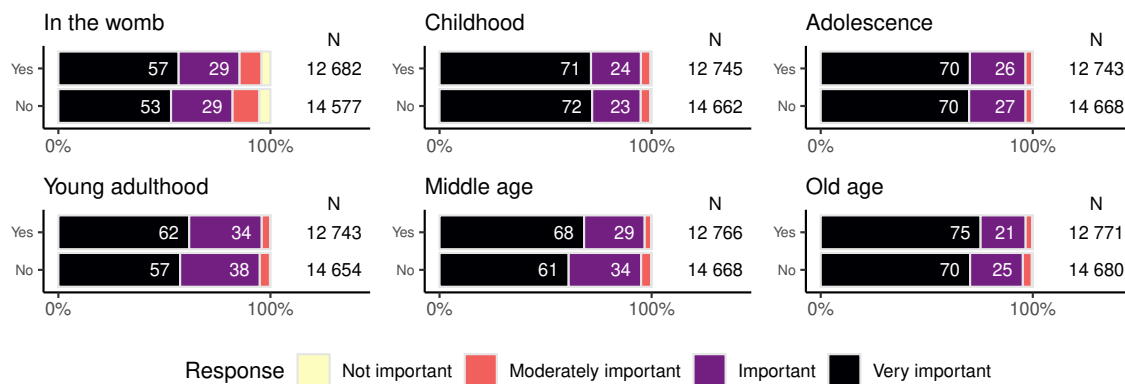

Question 2 asked respondents to rate on a 4...level scale at which life stages it is important to look after one's brain health. In the womb (before birth); Childhood (0–12 years); Adolescence (13–18 years); Young adulthood (19...45 years); Middle age (45–65 years); Old age (over 65 years) Here divided whether they had experience with looking after a member of family with brain disease. Categories with less than 20% of the responses do not have percentages shown.

## 2.11 Research participation

### Life periods to look after ones... brain

By experience of brain research participation

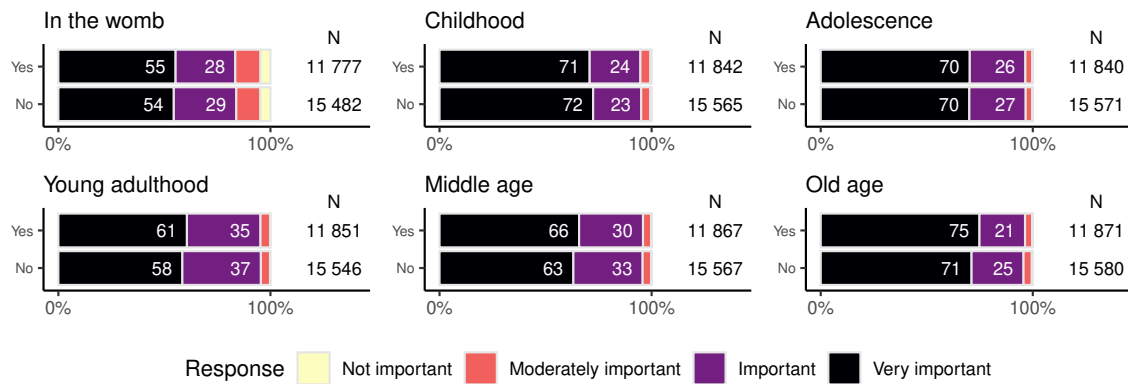

Question 2 asked respondents to rate on a 4...level scale at which life stages it is important to look after one's brain health. In the womb (before birth); Childhood (0–12 years); Adolescence (13–18 years); Young adulthood (19..45 years); Middle age (45–65 years); Old age (over 65 years) Here divided whether they have participated in brain research projects. Categories with less than 20% of the responses do not have percentages shown.

### 3 Question 3

#### 3.1 Overall

Diseases/disorders associated with the brain

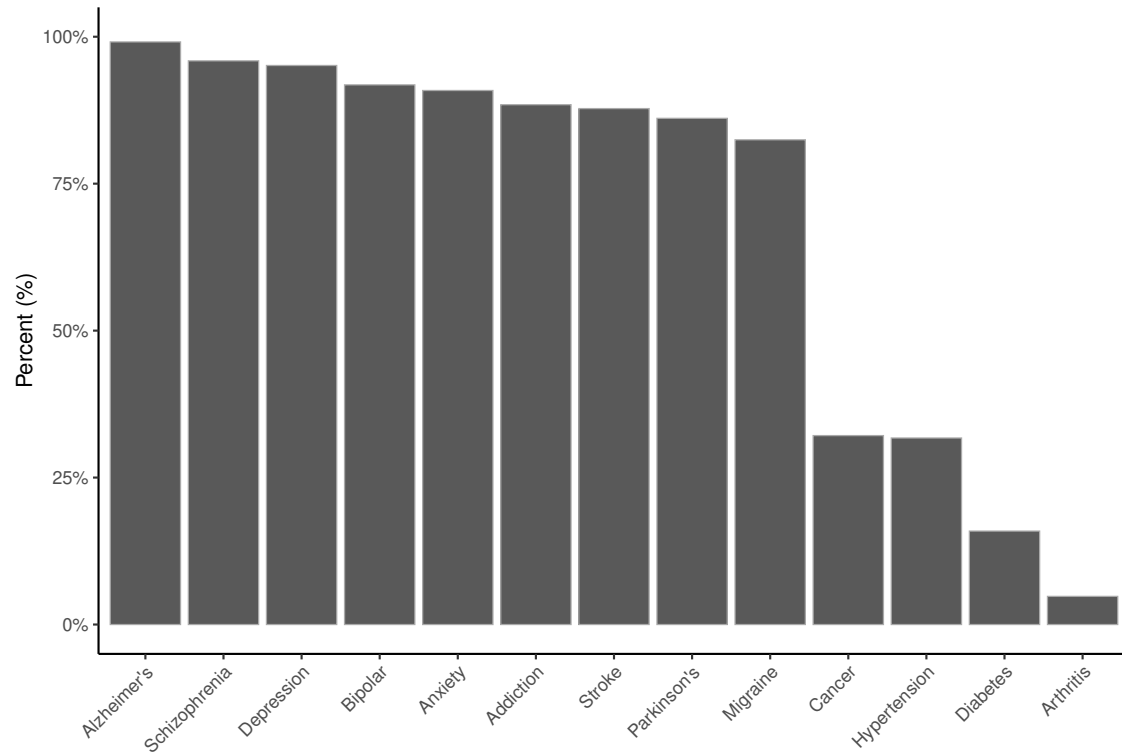

Respondents were given the option to tick boxes with the diseases presented above to indicate which ones they associated with the brain. They were allowed to select as many categories as they wished. The question was optional, and as such we present data from the 27 530 who responded to the question. We do not know if those who refrained from responding did so because they did not associate any of the diseases with the brain, or if they simply did not wish to respond.

### 3.2 Gender

Diseases/disorders associated with the brain  
by gender

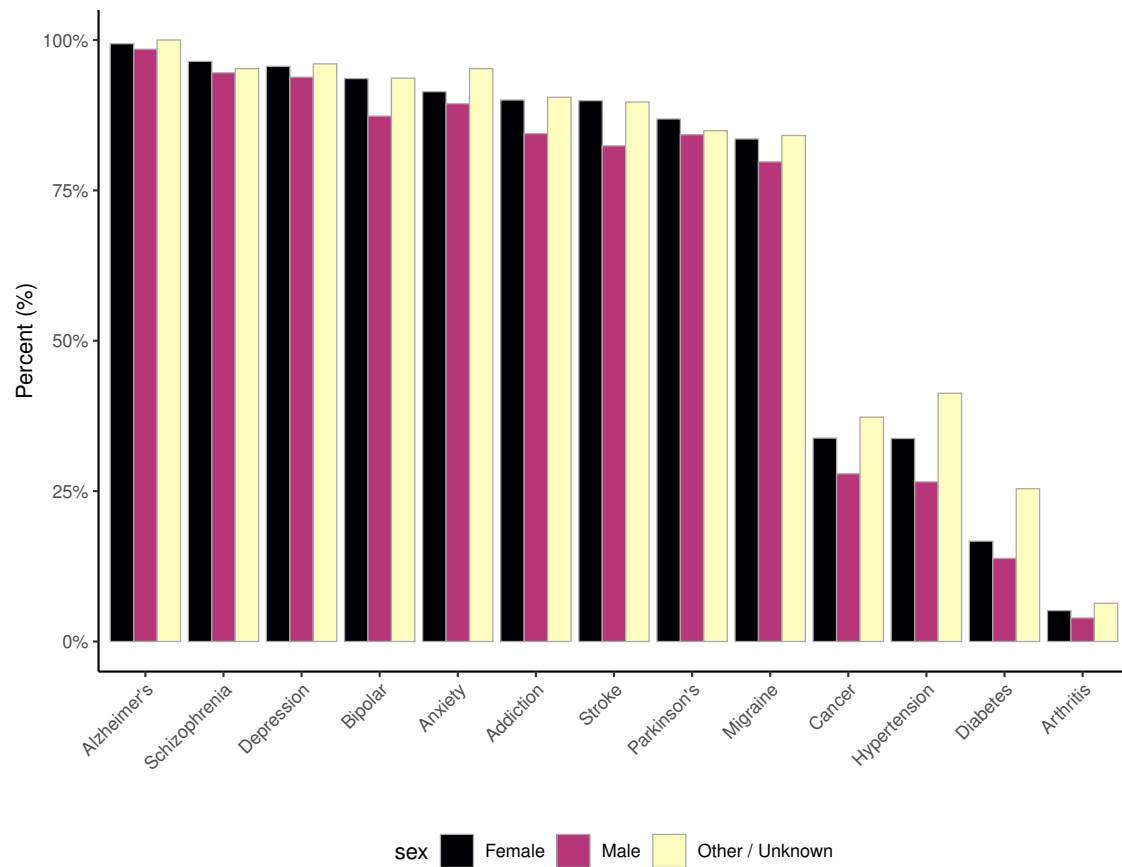

Respondents were given the option to tick boxes with the diseases presented above to indicate which ones they associated with the brain. They were allowed to select as many categories as they wished. The question was optional, and as such we present data from the 27 530 who responded to the question. We do not know if those who refrained from responding did so because they did not associate any of the diseases with the brain, or if they simply did not wish to respond. The number of male and female respondents differ between subplots due to missing answers.

### 3.3 Age groups

Diseases/disorders associated with the brain  
by age groups

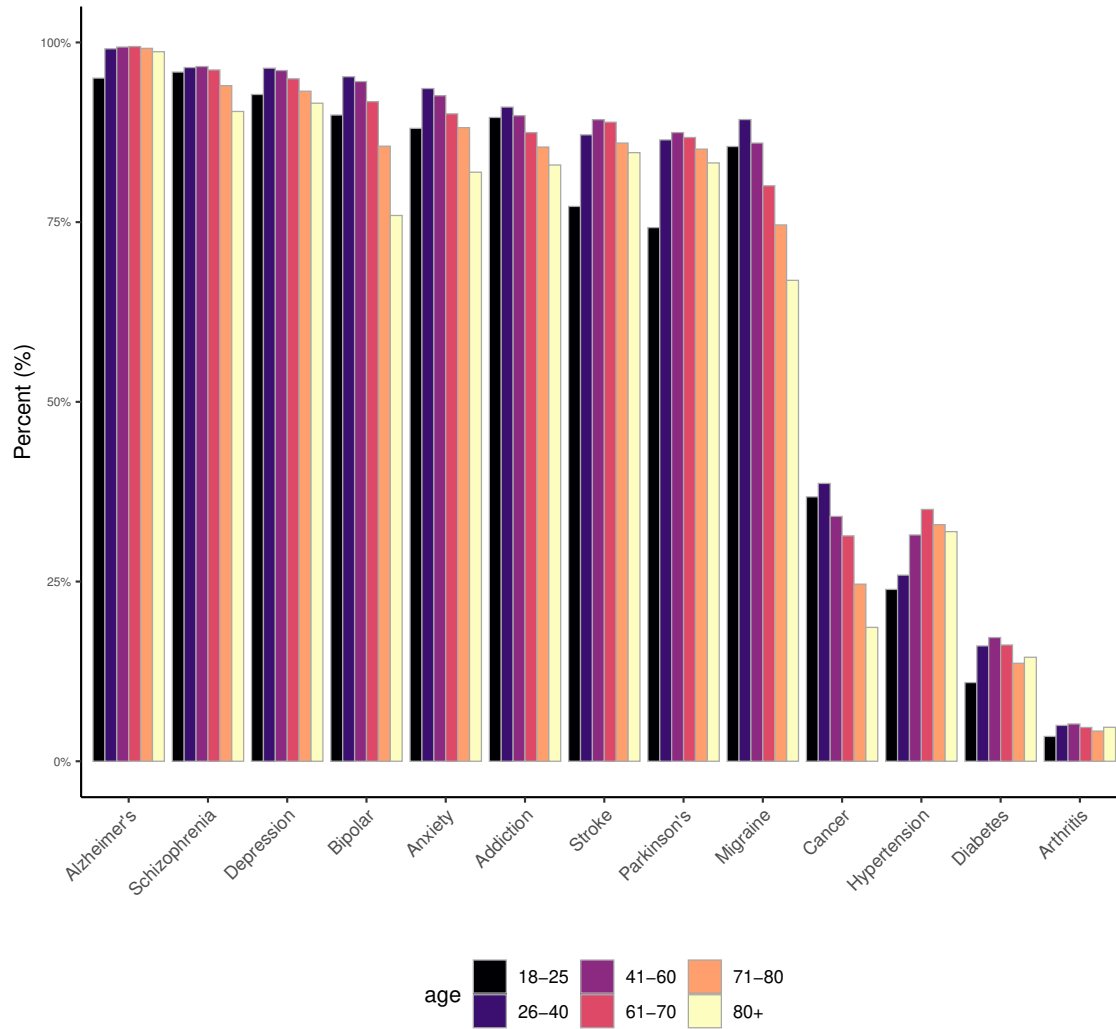

Respondents were given the option to tick boxes with the diseases presented above to indicate which ones they associated with the brain. They were allowed to select as many categories as they wished. The question was optional, and as such we present data from the 27 530 who responded to the question. We do not know if those who refrained from responding did so because they did not associate any of the diseases with the brain, or if they simply did not wish to respond.

### 3.4 Education

Diseases/disorders associated with the brain  
by education level

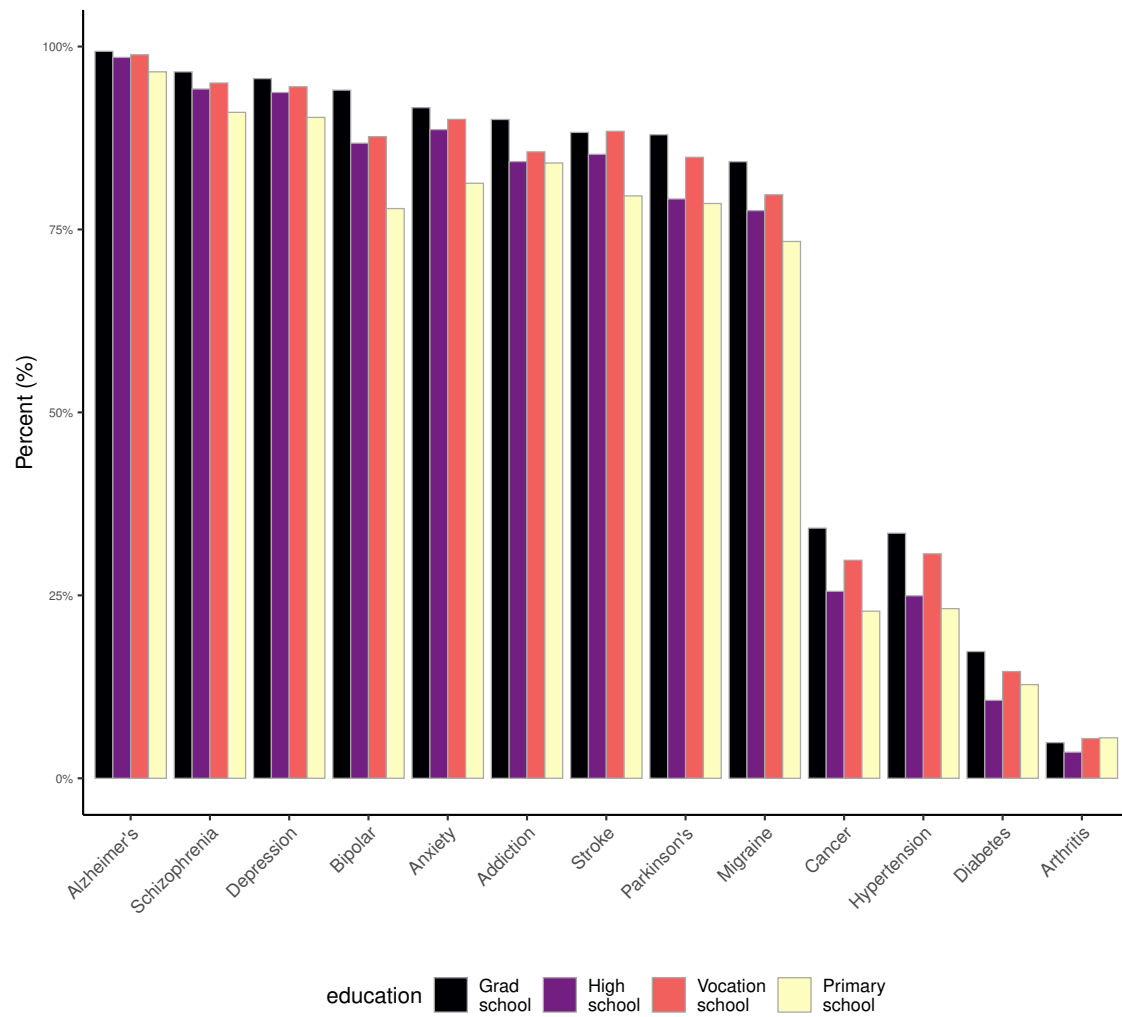

Respondents were given the option to tick boxes with the diseases presented above to indicate which ones they associated with the brain. They were allowed to select as many categories as they wished. The question was optional, and as such we present data from the 27 530 who responded to the question. We do not know if those who refrained from responding did so because they did not associate any of the diseases with the brain, or if they simply did not wish to respond. Percentages are added to clarify how large a porportion of the respondents associated the diseases with the brain.

### 3.5 Country

Diseases/disorders associated with the brain  
by country of residence

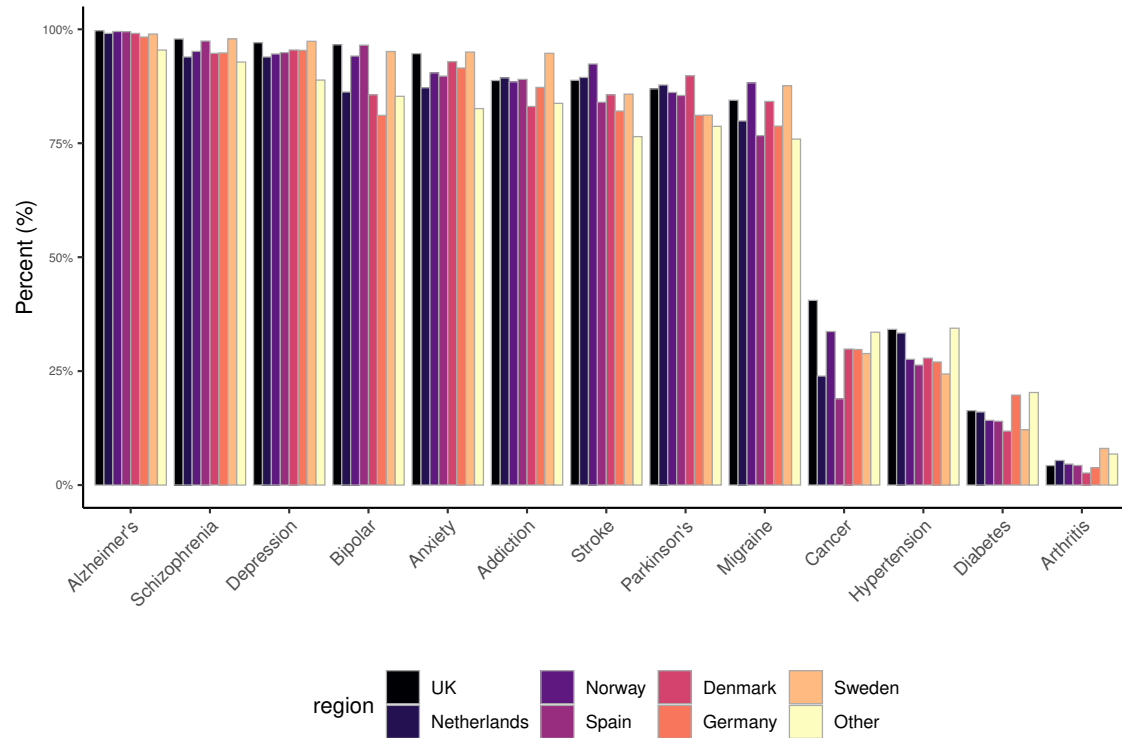

Respondents were given the option to tick boxes with the diseases presented above to indicate which ones they associated with the brain. They were allowed to select as many categories as they wished. The question was optional, and as such we present data from the 27 530 who responded to the question. We do not know if those who refrained from responding did so because they did not associate any of the diseases with the brain, or if they simply did not wish to respond.



### 3.6 Health care experience/education

#### Diseases/disorders associated with the brain

by reported education or work experience in health care...

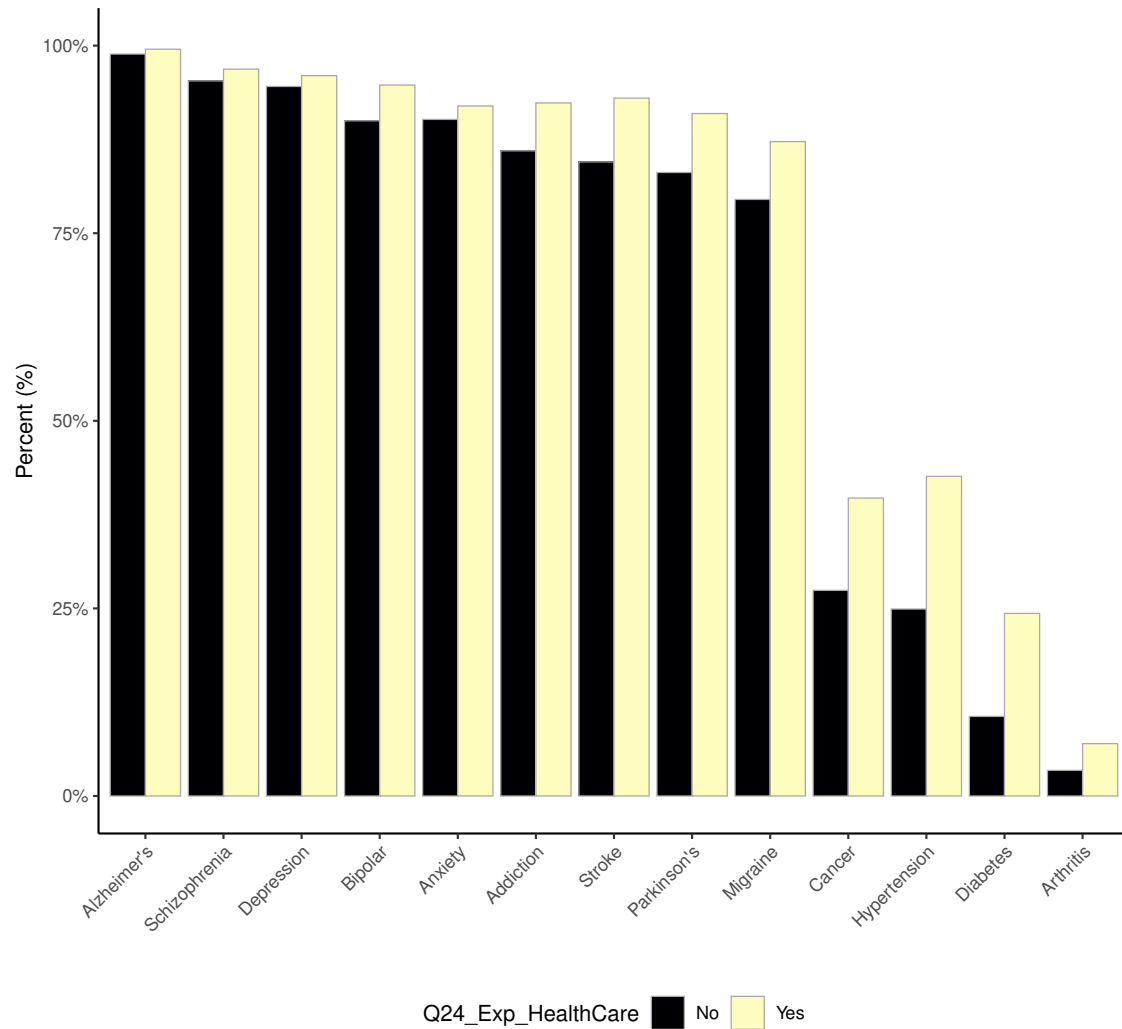

Respondents were given the option to tick boxes with the diseases presented above to indicate which ones they associated with the brain. They were allowed to select as many categories as they wished. The question was optional, and as such we present data from the 27 530 who responded to the question. We do not know if those who refrained from responding did so because they did not associate any of the diseases with the brain, or if they simply did not wish to respond.

### 3.7 Cognitive health

Diseases/disorders associated with the brain by self-rated cognitive health

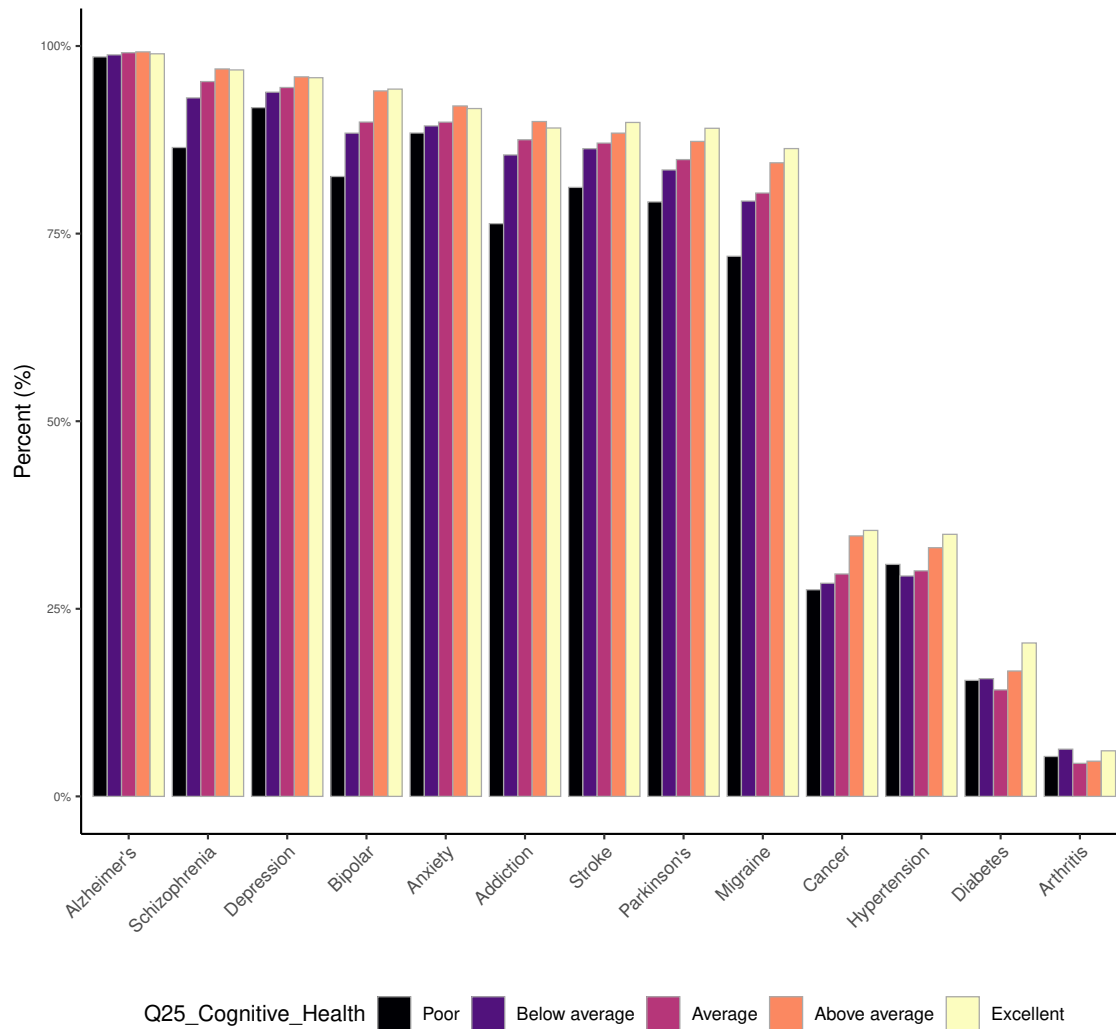

Respondents were given the option to tick boxes with the diseases presented above to indicate which ones they associated with the brain. They were allowed to select as many categories as they wished. The question was optional, and as such we present data from the 27 530 who responded to the question. We do not know if those who refrained from responding did so because they did not associate any of the diseases with the brain, or if they simply did not wish to respond.

### 3.8 Mental health

Diseases/disorders associated with the brain  
by self-rated mental health

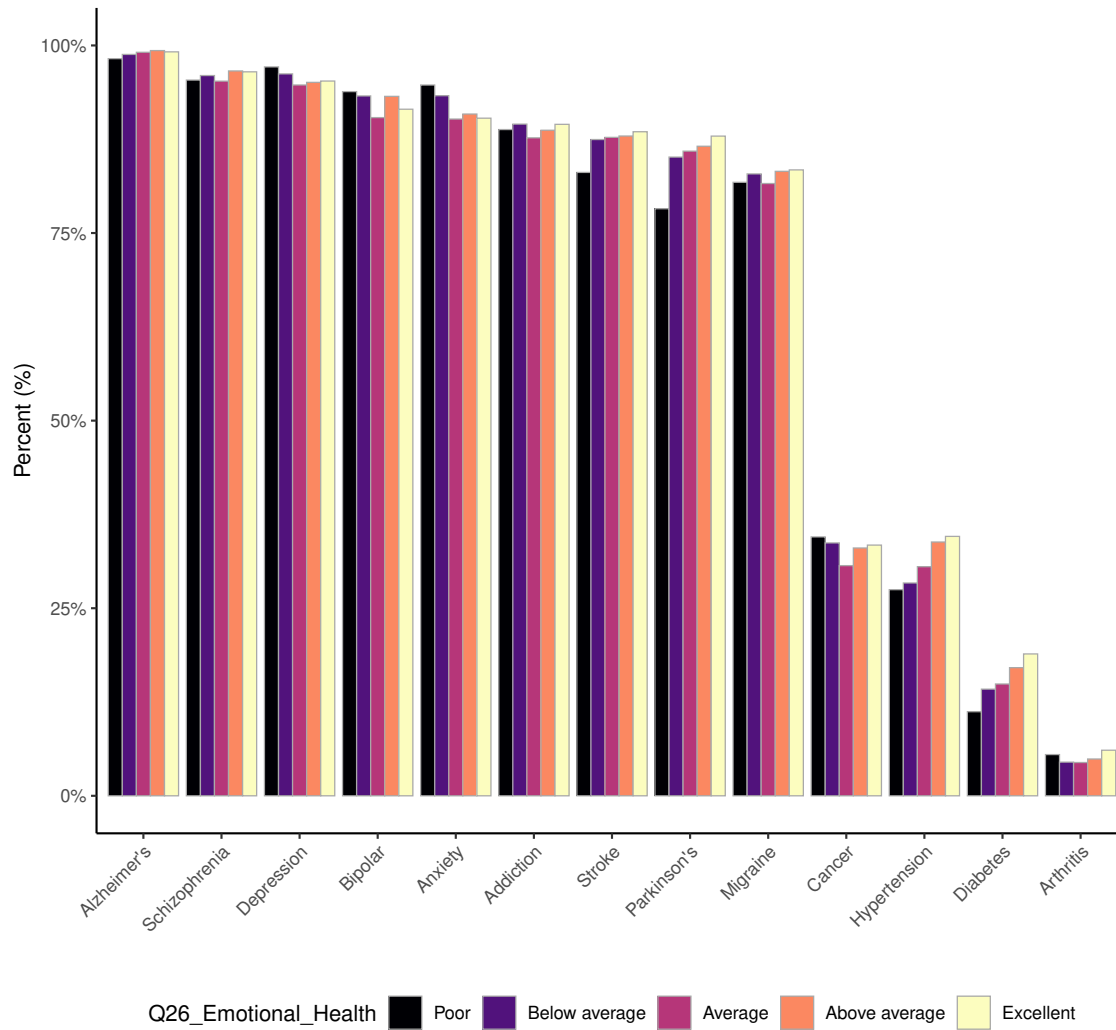

Respondents were given the option to tick boxes with the diseases presented above to indicate which ones they associated with the brain. They were allowed to select as many categories as they wished. The question was optional, and as such we present data from the 27 530 who responded to the question. We do not know if those who refrained from responding did so because they did not associate any of the diseases with the brain, or if they simply did not wish to respond.

### 3.9 Illness

#### Diseases/disorders associated with the brain

by experience of long-standing illness, disability or health problem

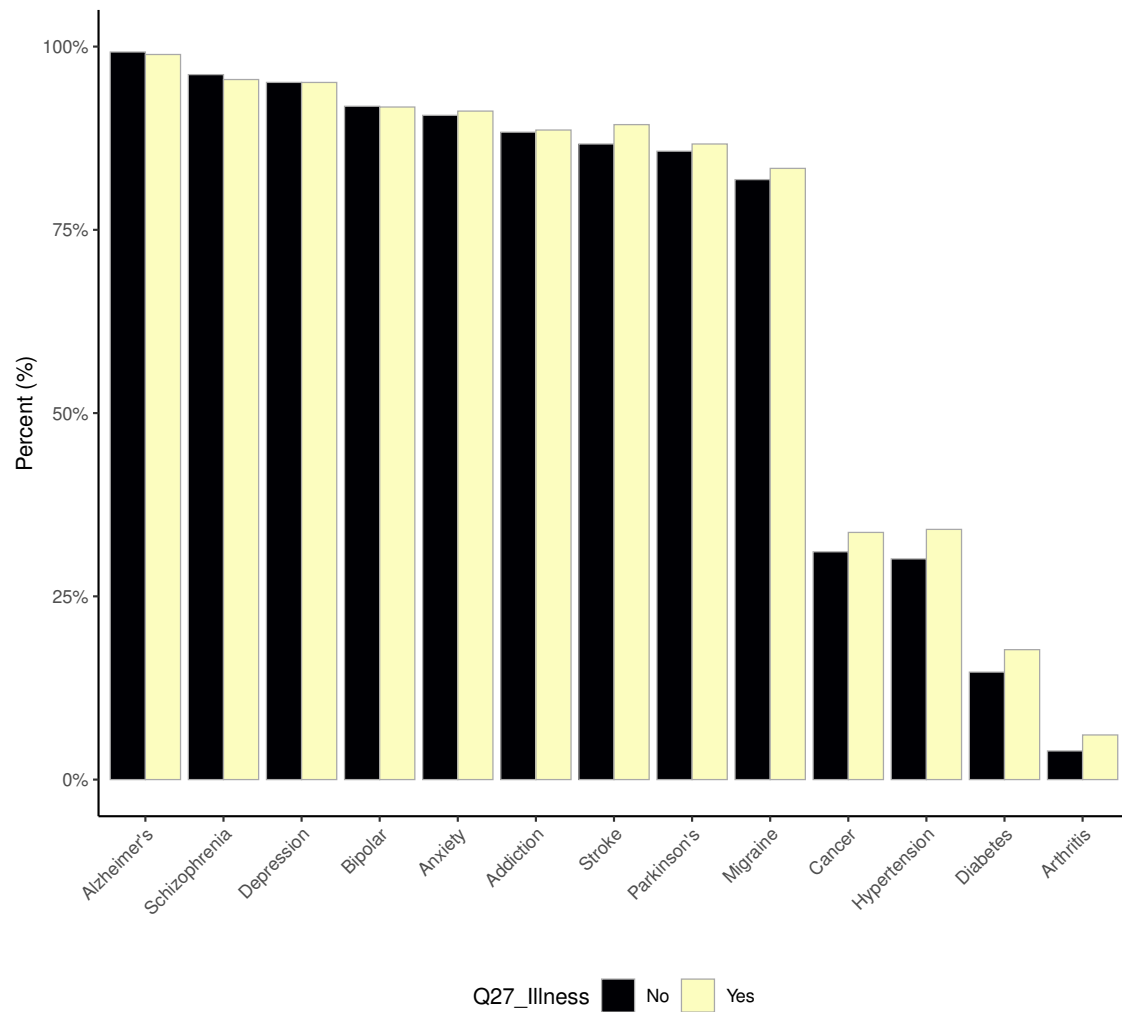

Respondents were given the option to tick boxes with the diseases presented above to indicate which ones they associated with the brain. They were allowed to select as many categories as they wished. The question was optional, and as such we present data from the 27 530 who responded to the question. We do not know if those who refrained from responding did so because they did not associate any of the diseases with the brain, or if they simply did not wish to respond. Here divided whether they had experience with long-standing illness, disability, or health problem.

### 3.10 Brain disease care

#### Ratings of factors influencing brain health

by experience of taking care of family member with brain disease

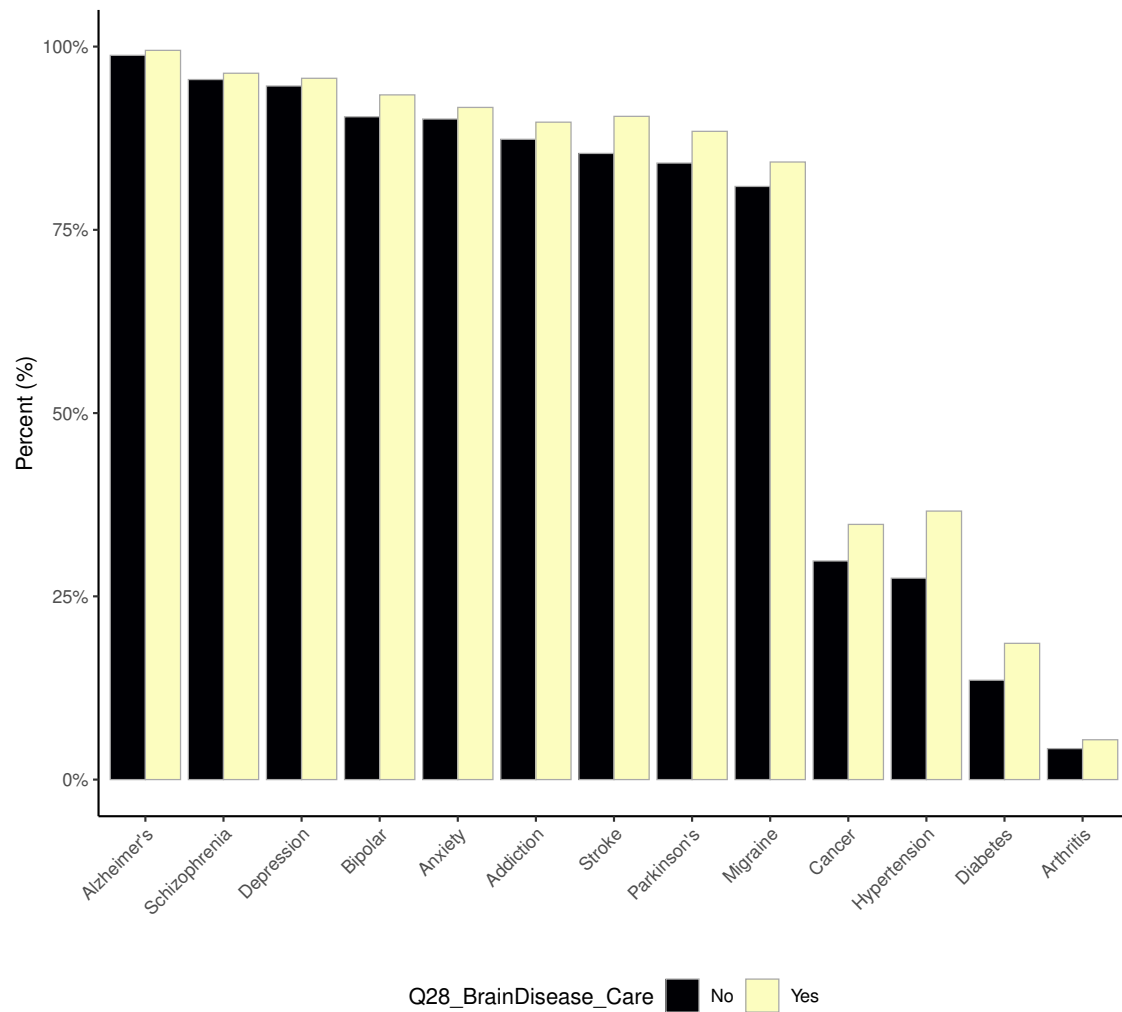

Respondents were given the option to tick boxes with the diseases presented above to indicate which ones they associated with the brain. They were allowed to select as many categories as they wished. The question was optional, and as such we present data from the 27 530 who responded to the question. We do not know if those who refrained from responding did so because they did not associate any of the diseases with the brain, or if they simply did not wish to respond. Here divided whether they had experience with looking after a member of family with brain disease.

### 3.11 Research participation

#### Ratings of factors influencing brain health

By experience of brain research participation

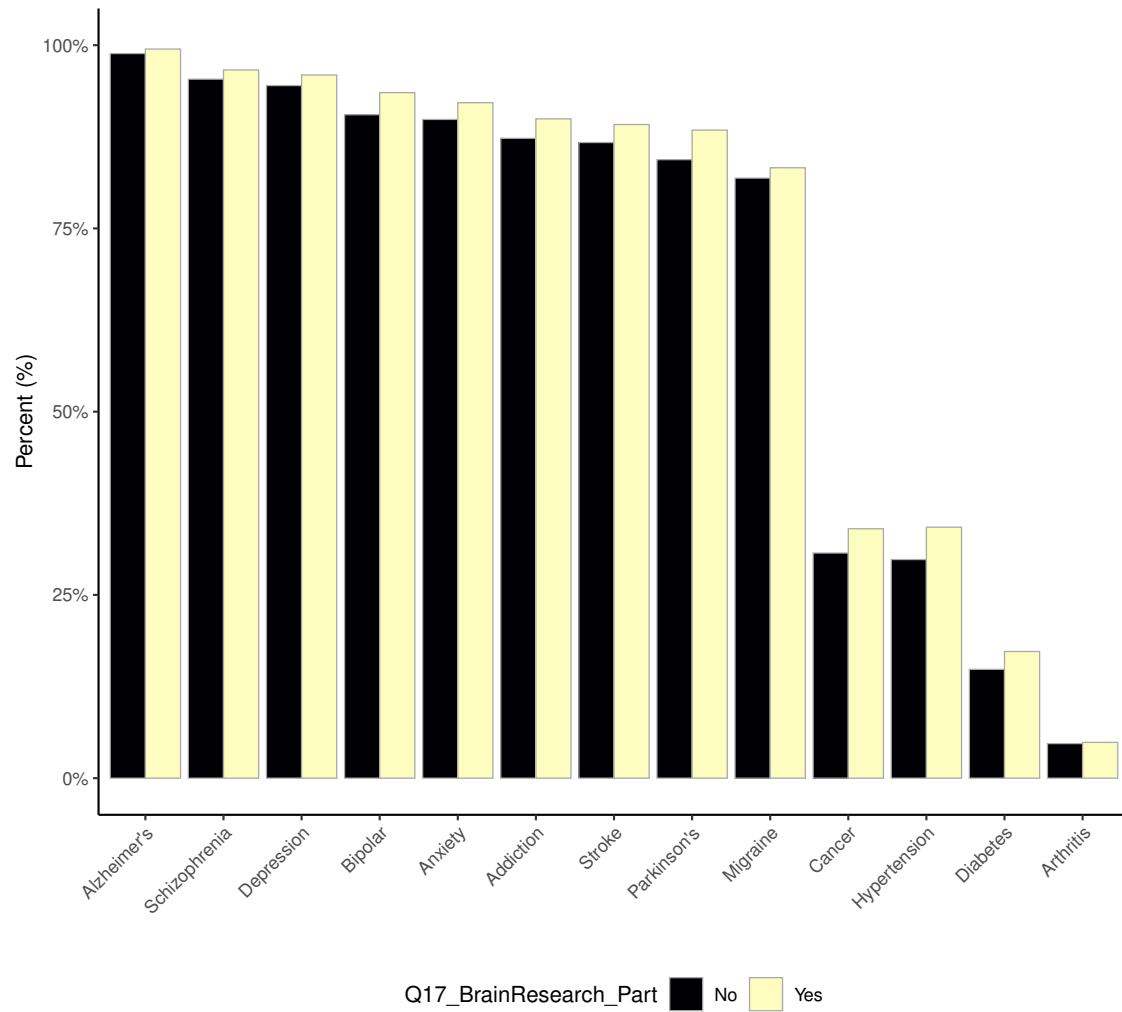

Respondents were given the option to tick boxes with the diseases presented above to indicate which ones they associated with the brain. They were allowed to select as many categories as they wished. The question was optional, and as such we present data from the 27 530 who responded to the question. We do not know if those who refrained from responding did so because they did not associate any of the diseases with the brain, or if they simply did not wish to respond. Here divided whether they have participated in brain research projects.
