# Supplementary material for: Public perceptions of brain health: an international, online cross-sectional survey
Source: PubMed Central journal article supplement — BMJ Open. 2022 Apr 18;12(4):e057999. doi: 10.1136/bmjopen-2021-057999 (PMC9016409; doi:10.1136/bmjopen-2021-057999), 2022-04-18
Supplement: bmjopen-2021-057999supp005.pdf [file bmjopen-2021-057999supp005.pdf]

# Lifebrain Global Brain Health Survey Supplementary material 3

## Odds ratios and 99% confidence intervals across all demographic characteristics

### Contents

|          |                                                                                                  |           |
|----------|--------------------------------------------------------------------------------------------------|-----------|
| <b>1</b> | <b>Question 1</b>                                                                                | <b>2</b>  |
| 1.1      | In your opinion, does <i>income</i> have an influence on brain health? . . . . .                 | 2         |
| 1.2      | In your opinion, does <i>profession</i> have an influence on brain health? . . . . .             | 3         |
| 1.3      | In your opinion, does <i>education</i> have an influence on brain health? . . . . .              | 4         |
| 1.4      | In your opinion, does <i>diet</i> have an influence on brain health? . . . . .                   | 5         |
| 1.5      | In your opinion, does <i>physical environment</i> have an influence on brain health? . . . . .   | 6         |
| 1.6      | In your opinion, does <i>life goals</i> have an influence on brain health? . . . . .             | 7         |
| 1.7      | In your opinion, does <i>social environment</i> have an influence on brain health? . . . . .     | 8         |
| 1.8      | In your opinion, does <i>sleeping habits</i> have an influence on brain health? . . . . .        | 9         |
| 1.9      | In your opinion, does <i>physical health</i> have an influence on brain health? . . . . .        | 10        |
| 1.10     | In your opinion, does <i>genetics</i> have an influence on brain health? . . . . .               | 11        |
| 1.11     | In your opinion, does <i>substance use</i> have an influence on brain health? . . . . .          | 12        |
| <b>2</b> | <b>Question 2</b>                                                                                | <b>13</b> |
| 2.1      | In your opinion, is it important to look after one's brain in <i>in the womb</i> ? . . . . .     | 13        |
| 2.2      | In your opinion, is it important to look after one's brain in <i>childhood</i> ? . . . . .       | 14        |
| 2.3      | In your opinion, is it important to look after one's brain in <i>adolescence</i> ? . . . . .     | 15        |
| 2.4      | In your opinion, is it important to look after one's brain in <i>young adulthood</i> ? . . . . . | 16        |
| 2.5      | In your opinion, is it important to look after one's brain in <i>middle age</i> ? . . . . .      | 17        |
| 2.6      | In your opinion, is it important to look after one's brain in <i>old age</i> ? . . . . .         | 18        |
| <b>3</b> | <b>Question 3</b>                                                                                | <b>19</b> |
| 3.1      | I associate <i>alzheimer's</i> with the brain. . . . .                                           | 19        |
| 3.2      | I associate <i>schizophrenia</i> with the brain. . . . .                                         | 20        |
| 3.3      | I associate <i>depression</i> with the brain. . . . .                                            | 21        |
| 3.4      | I associate <i>bipolar</i> with the brain. . . . .                                               | 22        |
| 3.5      | I associate <i>anxiety</i> with the brain. . . . .                                               | 23        |
| 3.6      | I associate <i>addiction</i> with the brain. . . . .                                             | 24        |
| 3.7      | I associate <i>stroke</i> with the brain. . . . .                                                | 25        |
| 3.8      | I associate <i>parkinson's</i> with the brain. . . . .                                           | 26        |
| 3.9      | I associate <i>migraine</i> with the brain. . . . .                                              | 27        |
| 3.10     | I associate <i>cancer</i> with the brain. . . . .                                                | 28        |
| 3.11     | I associate <i>hypertension</i> with the brain. . . . .                                          | 29        |
| 3.12     | I associate <i>diabetes</i> with the brain. . . . .                                              | 30        |
| 3.13     | I associate <i>arthritis</i> with the brain. . . . .                                             | 31        |

## 1 Question 1

### 1.1 In your opinion, does *income* have an influence on brain health?

Table 1: Q1 Income

| Variable/Subgroup                   | Descriptive   |        | Inferential |          |       |
|-------------------------------------|---------------|--------|-------------|----------|-------|
|                                     | Positive      | N      | OR          | CI (99%) |       |
|                                     |               |        |             | Lower    | Upper |
| <b>Age</b>                          |               |        |             |          |       |
| >= 61                               | 4 666 (36.8%) | 12 667 |             |          |       |
| <= 40                               | 1 434 (32.0%) | 4 482  | 0.81        | 0.73     | 0.89  |
| 41-60                               | 3 732 (36.3%) | 10 287 | 0.98        | 0.91     | 1.05  |
| <b>Education</b>                    |               |        |             |          |       |
| Higher                              | 6 607 (35.1%) | 18 834 |             |          |       |
| Lower                               | 3 225 (37.5%) | 8 602  | 1.11        | 1.04     | 1.19  |
| <b>Gender</b>                       |               |        |             |          |       |
| Woman                               | 7 061 (36.2%) | 19 527 |             |          |       |
| Man                                 | 2 720 (35.0%) | 7 782  | 0.95        | 0.88     | 1.02  |
| Other/Undisclosed                   | 51 (40.2%)    | 127    | 1.18        | 0.74     | 1.89  |
| <b>Healthcare Experience</b>        |               |        |             |          |       |
| No                                  | 5 641 (33.5%) | 16 855 |             |          |       |
| Yes                                 | 4 191 (39.6%) | 10 581 | 1.30        | 1.22     | 1.39  |
| <b>Cognitive Health</b>             |               |        |             |          |       |
| Average or above                    | 9 227 (35.8%) | 25 787 |             |          |       |
| Below average                       | 605 (36.7%)   | 1 649  | 1.04        | 0.91     | 1.19  |
| <b>Mental Health</b>                |               |        |             |          |       |
| Average or above                    | 8 535 (35.8%) | 23 822 |             |          |       |
| Below average                       | 1 297 (35.9%) | 3 614  | 1.00        | 0.91     | 1.10  |
| <b>Illness Experience</b>           |               |        |             |          |       |
| No                                  | 5 651 (34.5%) | 16 375 |             |          |       |
| Yes                                 | 4 181 (37.8%) | 11 061 | 1.15        | 1.08     | 1.23  |
| <b>Brain Disease Caregiver</b>      |               |        |             |          |       |
| No                                  | 5 199 (35.4%) | 14 682 |             |          |       |
| Yes                                 | 4 633 (36.3%) | 12 754 | 1.04        | 0.97     | 1.11  |
| <b>Brain Research Participation</b> |               |        |             |          |       |
| No                                  | 5 499 (35.3%) | 15 577 |             |          |       |
| Yes                                 | 4 333 (36.5%) | 11 859 | 1.06        | 0.99     | 1.13  |
| <b>Relationship</b>                 |               |        |             |          |       |
| Not stable                          | 4 335 (35.9%) | 12 091 |             |          |       |
| Stable                              | 5 497 (35.8%) | 15 345 | 1.00        | 0.94     | 1.07  |

1.2 In your opinion, does *profession* have an influence on brain health?

Table 2: Q1 Profession

| Variable/Subgroup                   | Descriptive    |        | Inferential |          |       |
|-------------------------------------|----------------|--------|-------------|----------|-------|
|                                     | Positive       | N      | OR          | CI (99%) |       |
|                                     |                |        |             | Lower    | Upper |
| <b>Age</b>                          |                |        |             |          |       |
| >= 61                               | 6 749 (53.2%)  | 12 675 |             |          |       |
| 41-60                               | 5 866 (57.0%)  | 10 300 | 1.16        | 1.08     | 1.24  |
| <= 40                               | 2 701 (60.2%)  | 4 484  | 1.33        | 1.21     | 1.46  |
| <b>Education</b>                    |                |        |             |          |       |
| Higher                              | 10 929 (58.0%) | 18 855 |             |          |       |
| Lower                               | 4 387 (51.0%)  | 8 604  | 0.75        | 0.71     | 0.81  |
| <b>Gender</b>                       |                |        |             |          |       |
| Woman                               | 10 675 (54.6%) | 19 542 |             |          |       |
| Other/Undisclosed                   | 69 (54.3%)     | 127    | 0.99        | 0.62     | 1.57  |
| Man                                 | 4 572 (58.7%)  | 7 790  | 1.18        | 1.10     | 1.27  |
| <b>Healthcare Experience</b>        |                |        |             |          |       |
| No                                  | 9 080 (53.9%)  | 16 861 |             |          |       |
| Yes                                 | 6 236 (58.8%)  | 10 598 | 1.23        | 1.15     | 1.31  |
| <b>Cognitive Health</b>             |                |        |             |          |       |
| Average or above                    | 14 473 (56.1%) | 25 810 |             |          |       |
| Below average                       | 843 (51.1%)    | 1 649  | 0.82        | 0.72     | 0.93  |
| <b>Mental Health</b>                |                |        |             |          |       |
| Average or above                    | 13 404 (56.2%) | 23 847 |             |          |       |
| Below average                       | 1 912 (52.9%)  | 3 612  | 0.88        | 0.80     | 0.96  |
| <b>Illness Experience</b>           |                |        |             |          |       |
| No                                  | 9 234 (56.4%)  | 16 383 |             |          |       |
| Yes                                 | 6 082 (54.9%)  | 11 076 | 0.94        | 0.88     | 1.01  |
| <b>Brain Disease Caregiver</b>      |                |        |             |          |       |
| No                                  | 8 392 (57.2%)  | 14 682 |             |          |       |
| Yes                                 | 6 924 (54.2%)  | 12 777 | 0.89        | 0.83     | 0.94  |
| <b>Brain Research Participation</b> |                |        |             |          |       |
| No                                  | 8 931 (57.3%)  | 15 590 |             |          |       |
| Yes                                 | 6 385 (53.8%)  | 11 869 | 0.87        | 0.81     | 0.92  |
| <b>Relationship</b>                 |                |        |             |          |       |
| Not stable                          | 6 788 (56.1%)  | 12 107 |             |          |       |
| Stable                              | 8 528 (55.5%)  | 15 352 | 0.98        | 0.92     | 1.04  |

### 1.3 In your opinion, does *education* have an influence on brain health?

Table 3: Q1 Education

| Variable/Subgroup                   | Descriptive    |        | Inferential |          |       |
|-------------------------------------|----------------|--------|-------------|----------|-------|
|                                     | Positive       | N      | OR          | CI (99%) |       |
|                                     |                |        |             | Lower    | Upper |
| <b>Age</b>                          |                |        |             |          |       |
| >= 61                               | 7 722 (60.9%)  | 12 685 |             |          |       |
| 41-60                               | 6 099 (59.2%)  | 10 301 | 0.93        | 0.87     | 1.00  |
| <= 40                               | 2 844 (63.4%)  | 4 487  | 1.11        | 1.01     | 1.22  |
| <b>Education</b>                    |                |        |             |          |       |
| Higher                              | 12 134 (64.3%) | 18 865 |             |          |       |
| Lower                               | 4 531 (52.6%)  | 8 608  | 0.62        | 0.58     | 0.66  |
| <b>Gender</b>                       |                |        |             |          |       |
| Woman                               | 11 695 (59.8%) | 19 550 |             |          |       |
| Man                                 | 4 888 (62.7%)  | 7 796  | 1.13        | 1.05     | 1.21  |
| Other/Undisclosed                   | 82 (64.6%)     | 127    | 1.22        | 0.76     | 1.98  |
| <b>Healthcare Experience</b>        |                |        |             |          |       |
| No                                  | 9 790 (58.0%)  | 16 870 |             |          |       |
| Yes                                 | 6 875 (64.8%)  | 10 603 | 1.33        | 1.25     | 1.42  |
| <b>Cognitive Health</b>             |                |        |             |          |       |
| Average or above                    | 15 811 (61.2%) | 25 824 |             |          |       |
| Below average                       | 854 (51.8%)    | 1 649  | 0.68        | 0.60     | 0.78  |
| <b>Mental Health</b>                |                |        |             |          |       |
| Average or above                    | 14 720 (61.7%) | 23 857 |             |          |       |
| Below average                       | 1 945 (53.8%)  | 3 616  | 0.72        | 0.66     | 0.79  |
| <b>Illness Experience</b>           |                |        |             |          |       |
| No                                  | 10 103 (61.6%) | 16 391 |             |          |       |
| Yes                                 | 6 562 (59.2%)  | 11 082 | 0.90        | 0.85     | 0.96  |
| <b>Brain Disease Caregiver</b>      |                |        |             |          |       |
| No                                  | 9 053 (61.6%)  | 14 698 |             |          |       |
| Yes                                 | 7 612 (59.6%)  | 12 775 | 0.92        | 0.86     | 0.98  |
| <b>Brain Research Participation</b> |                |        |             |          |       |
| No                                  | 9 493 (60.8%)  | 15 609 |             |          |       |
| Yes                                 | 7 172 (60.5%)  | 11 864 | 0.98        | 0.92     | 1.05  |
| <b>Relationship</b>                 |                |        |             |          |       |
| Not stable                          | 7 307 (60.3%)  | 12 114 |             |          |       |
| Stable                              | 9 358 (60.9%)  | 15 359 | 1.03        | 0.96     | 1.09  |

1.4 In your opinion, does *diet* have an influence on brain health?

Table 4: Q1 Diet

| Variable/Subgroup                   | Descriptive    |        | Inferential |          |       |
|-------------------------------------|----------------|--------|-------------|----------|-------|
|                                     | Positive       | N      | OR          | CI (99%) |       |
|                                     |                |        |             | Lower    | Upper |
| <b>Age</b>                          |                |        |             |          |       |
| >= 61                               | 8 411 (66.7%)  | 12 611 |             |          |       |
| 41-60                               | 7 759 (75.6%)  | 10 270 | 1.54        | 1.43     | 1.67  |
| <= 40                               | 3 413 (76.1%)  | 4 482  | 1.59        | 1.44     | 1.77  |
| <b>Education</b>                    |                |        |             |          |       |
| Higher                              | 13 742 (73.1%) | 18 793 |             |          |       |
| Lower                               | 5 841 (68.2%)  | 8 570  | 0.79        | 0.73     | 0.85  |
| <b>Gender</b>                       |                |        |             |          |       |
| Woman                               | 14 352 (73.7%) | 19 471 |             |          |       |
| Man                                 | 5 139 (66.2%)  | 7 765  | 0.70        | 0.65     | 0.75  |
| Other/Undisclosed                   | 92 (72.4%)     | 127    | 0.94        | 0.56     | 1.57  |
| <b>Healthcare Experience</b>        |                |        |             |          |       |
| No                                  | 11 604 (69.0%) | 16 809 |             |          |       |
| Yes                                 | 7 979 (75.6%)  | 10 554 | 1.39        | 1.29     | 1.49  |
| <b>Cognitive Health</b>             |                |        |             |          |       |
| Average or above                    | 18 564 (72.2%) | 25 723 |             |          |       |
| Below average                       | 1 019 (62.1%)  | 1 640  | 0.63        | 0.55     | 0.73  |
| <b>Mental Health</b>                |                |        |             |          |       |
| Average or above                    | 17 170 (72.3%) | 23 752 |             |          |       |
| Below average                       | 2 413 (66.8%)  | 3 611  | 0.77        | 0.70     | 0.85  |
| <b>Illness Experience</b>           |                |        |             |          |       |
| No                                  | 11 860 (72.6%) | 16 328 |             |          |       |
| Yes                                 | 7 723 (70.0%)  | 11 035 | 0.88        | 0.82     | 0.94  |
| <b>Brain Disease Caregiver</b>      |                |        |             |          |       |
| No                                  | 10 236 (70.0%) | 14 630 |             |          |       |
| Yes                                 | 9 347 (73.4%)  | 12 733 | 1.18        | 1.11     | 1.27  |
| <b>Brain Research Participation</b> |                |        |             |          |       |
| No                                  | 11 067 (71.2%) | 15 546 |             |          |       |
| Yes                                 | 8 516 (72.1%)  | 11 817 | 1.04        | 0.97     | 1.12  |
| <b>Relationship</b>                 |                |        |             |          |       |
| Not stable                          | 8 697 (72.0%)  | 12 079 |             |          |       |
| Stable                              | 10 886 (71.2%) | 15 284 | 0.96        | 0.90     | 1.03  |

## 1.5 In your opinion, does *physical environment* have an influence on brain health?

Table 5: Q1 Physical environment

| Variable/Subgroup                   | Descriptive    |        | Inferential |          |       |
|-------------------------------------|----------------|--------|-------------|----------|-------|
|                                     | Positive       | N      | OR          | CI (99%) |       |
|                                     |                |        |             | Lower    | Upper |
| <b>Age</b>                          |                |        |             |          |       |
| >= 61                               | 8 836 (69.8%)  | 12 656 |             |          |       |
| <= 40                               | 3 214 (71.7%)  | 4 480  | 1.10        | 0.99     | 1.21  |
| 41-60                               | 7 655 (74.3%)  | 10 296 | 1.25        | 1.16     | 1.35  |
| <b>Education</b>                    |                |        |             |          |       |
| Higher                              | 13 466 (71.5%) | 18 838 |             |          |       |
| Lower                               | 6 239 (72.6%)  | 8 594  | 1.06        | 0.98     | 1.14  |
| <b>Gender</b>                       |                |        |             |          |       |
| Woman                               | 14 191 (72.7%) | 19 522 |             |          |       |
| Man                                 | 5 416 (69.6%)  | 7 784  | 0.86        | 0.80     | 0.93  |
| Other/Undisclosed                   | 98 (77.8%)     | 126    | 1.31        | 0.76     | 2.29  |
| <b>Healthcare Experience</b>        |                |        |             |          |       |
| No                                  | 11 879 (70.5%) | 16 854 |             |          |       |
| Yes                                 | 7 826 (74.0%)  | 10 578 | 1.19        | 1.11     | 1.28  |
| <b>Cognitive Health</b>             |                |        |             |          |       |
| Average or above                    | 18 601 (72.1%) | 25 791 |             |          |       |
| Below average                       | 1 104 (67.3%)  | 1 641  | 0.79        | 0.69     | 0.91  |
| <b>Mental Health</b>                |                |        |             |          |       |
| Average or above                    | 17 171 (72.1%) | 23 824 |             |          |       |
| Below average                       | 2 534 (70.2%)  | 3 608  | 0.91        | 0.83     | 1.01  |
| <b>Illness Experience</b>           |                |        |             |          |       |
| No                                  | 11 585 (70.7%) | 16 376 |             |          |       |
| Yes                                 | 8 120 (73.4%)  | 11 056 | 1.14        | 1.07     | 1.23  |
| <b>Brain Disease Caregiver</b>      |                |        |             |          |       |
| No                                  | 10 490 (71.5%) | 14 668 |             |          |       |
| Yes                                 | 9 215 (72.2%)  | 12 764 | 1.03        | 0.96     | 1.11  |
| <b>Brain Research Participation</b> |                |        |             |          |       |
| No                                  | 11 164 (71.7%) | 15 575 |             |          |       |
| Yes                                 | 8 541 (72.0%)  | 11 857 | 1.02        | 0.95     | 1.09  |
| <b>Relationship</b>                 |                |        |             |          |       |
| Not stable                          | 8 779 (72.6%)  | 12 095 |             |          |       |
| Stable                              | 10 926 (71.2%) | 15 337 | 0.94        | 0.87     | 1.00  |

1.6 In your opinion, does *life goals* have an influence on brain health?

Table 6: Q1 Life goals

| Variable/Subgroup                   | Descriptive    |        | Inferential |          |       |
|-------------------------------------|----------------|--------|-------------|----------|-------|
|                                     | Positive       | N      | OR          | CI (99%) |       |
|                                     |                |        |             | Lower    | Upper |
| <b>Age</b>                          |                |        |             |          |       |
| >= 61                               | 9 441 (74.3%)  | 12 706 |             |          |       |
| <= 40                               | 3 017 (67.2%)  | 4 488  | 0.71        | 0.64     | 0.78  |
| 41-60                               | 7 551 (73.3%)  | 10 302 | 0.95        | 0.88     | 1.03  |
| <b>Education</b>                    |                |        |             |          |       |
| Higher                              | 13 811 (73.2%) | 18 875 |             |          |       |
| Lower                               | 6 198 (71.9%)  | 8 621  | 0.94        | 0.87     | 1.01  |
| <b>Gender</b>                       |                |        |             |          |       |
| Woman                               | 14 370 (73.5%) | 19 562 |             |          |       |
| Other/Undisclosed                   | 90 (70.9%)     | 127    | 0.88        | 0.53     | 1.46  |
| Man                                 | 5 549 (71.1%)  | 7 807  | 0.89        | 0.82     | 0.96  |
| <b>Healthcare Experience</b>        |                |        |             |          |       |
| No                                  | 11 978 (70.9%) | 16 888 |             |          |       |
| Yes                                 | 8 031 (75.7%)  | 10 608 | 1.28        | 1.19     | 1.37  |
| <b>Cognitive Health</b>             |                |        |             |          |       |
| Average or above                    | 18 839 (72.9%) | 25 846 |             |          |       |
| Below average                       | 1 170 (70.9%)  | 1 650  | 0.91        | 0.78     | 1.05  |
| <b>Mental Health</b>                |                |        |             |          |       |
| Average or above                    | 17 521 (73.4%) | 23 880 |             |          |       |
| Below average                       | 2 488 (68.8%)  | 3 616  | 0.80        | 0.72     | 0.88  |
| <b>Illness Experience</b>           |                |        |             |          |       |
| No                                  | 11 891 (72.5%) | 16 396 |             |          |       |
| Yes                                 | 8 118 (73.1%)  | 11 100 | 1.03        | 0.96     | 1.11  |
| <b>Brain Disease Caregiver</b>      |                |        |             |          |       |
| No                                  | 10 756 (73.1%) | 14 708 |             |          |       |
| Yes                                 | 9 253 (72.4%)  | 12 788 | 0.96        | 0.90     | 1.03  |
| <b>Brain Research Participation</b> |                |        |             |          |       |
| No                                  | 11 550 (74.0%) | 15 611 |             |          |       |
| Yes                                 | 8 459 (71.2%)  | 11 885 | 0.87        | 0.81     | 0.93  |
| <b>Relationship</b>                 |                |        |             |          |       |
| Not stable                          | 8 804 (72.6%)  | 12 121 |             |          |       |
| Stable                              | 11 205 (72.9%) | 15 375 | 1.01        | 0.94     | 1.09  |

1.7 In your opinion, does *social environment* have an influence on brain health?

Table 7: Q1 Social environment

| Variable/Subgroup                   | Descriptive    |        | Inferential |          |       |
|-------------------------------------|----------------|--------|-------------|----------|-------|
|                                     | Positive       | N      | OR          | CI (99%) |       |
|                                     |                |        |             | Lower    | Upper |
| <b>Age</b>                          |                |        |             |          |       |
| >= 61                               | 10 148 (79.9%) | 12 694 |             |          |       |
| 41-60                               | 8 671 (84.1%)  | 10 306 | 1.33        | 1.22     | 1.46  |
| <= 40                               | 3 919 (87.3%)  | 4 488  | 1.73        | 1.52     | 1.97  |
| <b>Education</b>                    |                |        |             |          |       |
| Higher                              | 15 768 (83.6%) | 18 870 |             |          |       |
| Lower                               | 6 970 (80.9%)  | 8 618  | 0.83        | 0.76     | 0.91  |
| <b>Gender</b>                       |                |        |             |          |       |
| Woman                               | 16 441 (84.1%) | 19 559 |             |          |       |
| Man                                 | 6 184 (79.2%)  | 7 804  | 0.72        | 0.66     | 0.79  |
| Other/Undisclosed                   | 113 (90.4%)    | 125    | 1.79        | 0.81     | 3.91  |
| <b>Healthcare Experience</b>        |                |        |             |          |       |
| No                                  | 13 615 (80.6%) | 16 887 |             |          |       |
| Yes                                 | 9 123 (86.1%)  | 10 601 | 1.48        | 1.36     | 1.62  |
| <b>Cognitive Health</b>             |                |        |             |          |       |
| Average or above                    | 21 472 (83.1%) | 25 835 |             |          |       |
| Below average                       | 1 266 (76.6%)  | 1 653  | 0.66        | 0.57     | 0.78  |
| <b>Mental Health</b>                |                |        |             |          |       |
| Average or above                    | 19 732 (82.7%) | 23 870 |             |          |       |
| Below average                       | 3 006 (83.1%)  | 3 618  | 1.03        | 0.91     | 1.16  |
| <b>Illness Experience</b>           |                |        |             |          |       |
| No                                  | 13 612 (83.0%) | 16 398 |             |          |       |
| Yes                                 | 9 126 (82.3%)  | 11 090 | 0.95        | 0.87     | 1.03  |
| <b>Brain Disease Caregiver</b>      |                |        |             |          |       |
| No                                  | 12 120 (82.4%) | 14 705 |             |          |       |
| Yes                                 | 10 618 (83.1%) | 12 783 | 1.05        | 0.96     | 1.14  |
| <b>Brain Research Participation</b> |                |        |             |          |       |
| No                                  | 12 983 (83.2%) | 15 608 |             |          |       |
| Yes                                 | 9 755 (82.1%)  | 11 880 | 0.93        | 0.85     | 1.01  |
| <b>Relationship</b>                 |                |        |             |          |       |
| Not stable                          | 10 054 (82.9%) | 12 122 |             |          |       |
| Stable                              | 12 684 (82.5%) | 15 366 | 0.97        | 0.90     | 1.06  |



1.8 In your opinion, does *sleeping habits* have an influence on brain health?

Table 8: Q1 Sleeping habits

| Variable/Subgroup                   | Descriptive    |        | Inferential |          |       |
|-------------------------------------|----------------|--------|-------------|----------|-------|
|                                     | Positive       | N      | OR          | CI (99%) |       |
|                                     |                |        |             | Lower    | Upper |
| <b>Age</b>                          |                |        |             |          |       |
| >= 61                               | 10 097 (79.6%) | 12 685 |             |          |       |
| 41-60                               | 9 166 (89.0%)  | 10 304 | 2.06        | 1.87     | 2.28  |
| <= 40                               | 4 109 (91.6%)  | 4 488  | 2.78        | 2.39     | 3.23  |
| <b>Education</b>                    |                |        |             |          |       |
| Higher                              | 16 185 (85.8%) | 18 863 |             |          |       |
| Lower                               | 7 187 (83.4%)  | 8 614  | 0.83        | 0.76     | 0.91  |
| <b>Gender</b>                       |                |        |             |          |       |
| Woman                               | 16 921 (86.5%) | 19 554 |             |          |       |
| Man                                 | 6 340 (81.3%)  | 7 796  | 0.68        | 0.62     | 0.74  |
| Other/Undisclosed                   | 111 (87.4%)    | 127    | 1.08        | 0.54     | 2.16  |
| <b>Healthcare Experience</b>        |                |        |             |          |       |
| No                                  | 14 112 (83.6%) | 16 874 |             |          |       |
| Yes                                 | 9 260 (87.3%)  | 10 603 | 1.35        | 1.23     | 1.48  |
| <b>Cognitive Health</b>             |                |        |             |          |       |
| Average or above                    | 21 983 (85.1%) | 25 824 |             |          |       |
| Below average                       | 1 389 (84.0%)  | 1 653  | 0.92        | 0.77     | 1.10  |
| <b>Mental Health</b>                |                |        |             |          |       |
| Average or above                    | 20 187 (84.6%) | 23 857 |             |          |       |
| Below average                       | 3 185 (88.0%)  | 3 620  | 1.33        | 1.16     | 1.53  |
| <b>Illness Experience</b>           |                |        |             |          |       |
| No                                  | 13 838 (84.5%) | 16 384 |             |          |       |
| Yes                                 | 9 534 (85.9%)  | 11 093 | 1.13        | 1.03     | 1.23  |
| <b>Brain Disease Caregiver</b>      |                |        |             |          |       |
| No                                  | 12 549 (85.4%) | 14 695 |             |          |       |
| Yes                                 | 10 823 (84.7%) | 12 782 | 0.94        | 0.87     | 1.03  |
| <b>Brain Research Participation</b> |                |        |             |          |       |
| No                                  | 13 571 (86.9%) | 15 608 |             |          |       |
| Yes                                 | 9 801 (82.6%)  | 11 869 | 0.71        | 0.65     | 0.78  |
| <b>Relationship</b>                 |                |        |             |          |       |
| Not stable                          | 10 479 (86.5%) | 12 112 |             |          |       |
| Stable                              | 12 893 (83.9%) | 15 365 | 0.81        | 0.74     | 0.89  |

1.9 In your opinion, does *physical health* have an influence on brain health?

Table 9: Q1 Physical health

| Variable/Subgroup                   | Descriptive    |        | Inferential |          |       |
|-------------------------------------|----------------|--------|-------------|----------|-------|
|                                     | Positive       | N      | OR          | CI (99%) |       |
|                                     |                |        |             | Lower    | Upper |
| <b>Age</b>                          |                |        |             |          |       |
| >= 61                               | 10 976 (86.6%) | 12 671 |             |          |       |
| 41-60                               | 9 068 (88.1%)  | 10 296 | 1.14        | 1.03     | 1.26  |
| <= 40                               | 3 961 (88.4%)  | 4 483  | 1.17        | 1.02     | 1.34  |
| <b>Education</b>                    |                |        |             |          |       |
| Higher                              | 16 697 (88.6%) | 18 851 |             |          |       |
| Lower                               | 7 308 (85.0%)  | 8 599  | 0.73        | 0.66     | 0.81  |
| <b>Gender</b>                       |                |        |             |          |       |
| Woman                               | 17 244 (88.3%) | 19 525 |             |          |       |
| Other/Undisclosed                   | 108 (85.0%)    | 127    | 0.75        | 0.39     | 1.43  |
| Man                                 | 6 653 (85.3%)  | 7 798  | 0.77        | 0.70     | 0.85  |
| <b>Healthcare Experience</b>        |                |        |             |          |       |
| No                                  | 14 454 (85.7%) | 16 862 |             |          |       |
| Yes                                 | 9 551 (90.2%)  | 10 588 | 1.53        | 1.39     | 1.70  |
| <b>Cognitive Health</b>             |                |        |             |          |       |
| Average or above                    | 22 682 (87.9%) | 25 802 |             |          |       |
| Below average                       | 1 323 (80.3%)  | 1 648  | 0.56        | 0.47     | 0.66  |
| <b>Mental Health</b>                |                |        |             |          |       |
| Average or above                    | 20 948 (87.9%) | 23 830 |             |          |       |
| Below average                       | 3 057 (84.4%)  | 3 620  | 0.75        | 0.66     | 0.85  |
| <b>Illness Experience</b>           |                |        |             |          |       |
| No                                  | 14 462 (88.3%) | 16 375 |             |          |       |
| Yes                                 | 9 543 (86.2%)  | 11 075 | 0.82        | 0.75     | 0.91  |
| <b>Brain Disease Caregiver</b>      |                |        |             |          |       |
| No                                  | 12 764 (86.9%) | 14 682 |             |          |       |
| Yes                                 | 11 241 (88.0%) | 12 768 | 1.11        | 1.01     | 1.22  |
| <b>Brain Research Participation</b> |                |        |             |          |       |
| No                                  | 13 592 (87.2%) | 15 588 |             |          |       |
| Yes                                 | 10 413 (87.8%) | 11 862 | 1.06        | 0.96     | 1.16  |
| <b>Relationship</b>                 |                |        |             |          |       |
| Not stable                          | 10 540 (87.0%) | 12 110 |             |          |       |
| Stable                              | 13 465 (87.8%) | 15 340 | 1.07        | 0.97     | 1.18  |

1.10 In your opinion, does *genetics* have an influence on brain health?

Table 10: Q1 Genetics

| Variable/Subgroup                   | Descriptive    |        | Inferential |          |       |
|-------------------------------------|----------------|--------|-------------|----------|-------|
|                                     | Positive       | N      | OR          | CI (99%) |       |
|                                     |                |        |             | Lower    | Upper |
| <b>Age</b>                          |                |        |             |          |       |
| >= 61                               | 10 588 (83.4%) | 12 689 |             |          |       |
| <= 40                               | 3 435 (76.6%)  | 4 487  | 0.65        | 0.58     | 0.72  |
| 41-60                               | 8 610 (83.6%)  | 10 302 | 1.01        | 0.92     | 1.11  |
| <b>Education</b>                    |                |        |             |          |       |
| Higher                              | 15 586 (82.6%) | 18 863 |             |          |       |
| Lower                               | 7 047 (81.8%)  | 8 615  | 0.94        | 0.87     | 1.03  |
| <b>Gender</b>                       |                |        |             |          |       |
| Woman                               | 16 311 (83.4%) | 19 556 |             |          |       |
| Other/Undisclosed                   | 88 (69.8%)     | 126    | 0.46        | 0.28     | 0.76  |
| Man                                 | 6 234 (80.0%)  | 7 796  | 0.79        | 0.73     | 0.87  |
| <b>Healthcare Experience</b>        |                |        |             |          |       |
| No                                  | 13 797 (81.7%) | 16 882 |             |          |       |
| Yes                                 | 8 836 (83.4%)  | 10 596 | 1.12        | 1.03     | 1.22  |
| <b>Cognitive Health</b>             |                |        |             |          |       |
| Average or above                    | 21 319 (82.5%) | 25 829 |             |          |       |
| Below average                       | 1 314 (79.7%)  | 1 649  | 0.83        | 0.70     | 0.98  |
| <b>Mental Health</b>                |                |        |             |          |       |
| Average or above                    | 19 648 (82.3%) | 23 861 |             |          |       |
| Below average                       | 2 985 (82.5%)  | 3 617  | 1.01        | 0.90     | 1.14  |
| <b>Illness Experience</b>           |                |        |             |          |       |
| No                                  | 13 446 (82.0%) | 16 390 |             |          |       |
| Yes                                 | 9 187 (82.9%)  | 11 088 | 1.06        | 0.97     | 1.15  |
| <b>Brain Disease Caregiver</b>      |                |        |             |          |       |
| No                                  | 11 717 (79.7%) | 14 693 |             |          |       |
| Yes                                 | 10 916 (85.4%) | 12 785 | 1.48        | 1.36     | 1.61  |
| <b>Brain Research Participation</b> |                |        |             |          |       |
| No                                  | 12 644 (81.0%) | 15 605 |             |          |       |
| Yes                                 | 9 989 (84.1%)  | 11 873 | 1.24        | 1.14     | 1.35  |
| <b>Relationship</b>                 |                |        |             |          |       |
| Not stable                          | 9 796 (80.9%)  | 12 115 |             |          |       |
| Stable                              | 12 837 (83.6%) | 15 363 | 1.20        | 1.11     | 1.31  |

1.11 In your opinion, does *substance use* have an influence on brain health?

Table 11: Q1 Substance use

| Variable/Subgroup                   | Descriptive    |        | Inferential |          |       |
|-------------------------------------|----------------|--------|-------------|----------|-------|
|                                     | Positive       | N      | OR          | CI (99%) |       |
|                                     |                |        |             | Lower    | Upper |
| <b>Age</b>                          |                |        |             |          |       |
| >= 61                               | 11 491 (90.5%) | 12 692 |             |          |       |
| <= 40                               | 4 179 (93.2%)  | 4 485  | 1.43        | 1.20     | 1.69  |
| 41-60                               | 9 712 (94.2%)  | 10 308 | 1.70        | 1.49     | 1.95  |
| <b>Education</b>                    |                |        |             |          |       |
| Higher                              | 17 546 (93.0%) | 18 866 |             |          |       |
| Lower                               | 7 836 (90.9%)  | 8 619  | 0.75        | 0.67     | 0.85  |
| <b>Gender</b>                       |                |        |             |          |       |
| Woman                               | 18 238 (93.3%) | 19 551 |             |          |       |
| Other/Undisclosed                   | 109 (85.8%)    | 127    | 0.44        | 0.23     | 0.84  |
| Man                                 | 7 035 (90.1%)  | 7 807  | 0.66        | 0.58     | 0.74  |
| <b>Healthcare Experience</b>        |                |        |             |          |       |
| No                                  | 15 416 (91.3%) | 16 886 |             |          |       |
| Yes                                 | 9 966 (94.0%)  | 10 599 | 1.50        | 1.32     | 1.70  |
| <b>Cognitive Health</b>             |                |        |             |          |       |
| Average or above                    | 23 942 (92.7%) | 25 832 |             |          |       |
| Below average                       | 1 440 (87.1%)  | 1 653  | 0.53        | 0.44     | 0.65  |
| <b>Mental Health</b>                |                |        |             |          |       |
| Average or above                    | 22 069 (92.5%) | 23 866 |             |          |       |
| Below average                       | 3 313 (91.5%)  | 3 619  | 0.88        | 0.75     | 1.04  |
| <b>Illness Experience</b>           |                |        |             |          |       |
| No                                  | 15 240 (93.0%) | 16 395 |             |          |       |
| Yes                                 | 10 142 (91.5%) | 11 090 | 0.81        | 0.72     | 0.91  |
| <b>Brain Disease Caregiver</b>      |                |        |             |          |       |
| No                                  | 13 525 (92.0%) | 14 709 |             |          |       |
| Yes                                 | 11 857 (92.8%) | 12 776 | 1.13        | 1.00     | 1.27  |
| <b>Brain Research Participation</b> |                |        |             |          |       |
| No                                  | 14 422 (92.3%) | 15 619 |             |          |       |
| Yes                                 | 10 960 (92.4%) | 11 866 | 1.00        | 0.89     | 1.13  |
| <b>Relationship</b>                 |                |        |             |          |       |
| Not stable                          | 11 151 (92.0%) | 12 117 |             |          |       |
| Stable                              | 14 231 (92.6%) | 15 368 | 1.08        | 0.96     | 1.22  |

## 2 Question 2

### 2.1 In your opinion, is it important to look after one's brain in *in the womb*?

Table 12: Q2 In the womb

| Variable/Subgroup                   | Descriptive    |        | Inferential |          |       |
|-------------------------------------|----------------|--------|-------------|----------|-------|
|                                     | Positive       | N      | OR          | CI (99%) |       |
|                                     |                |        |             | Lower    | Upper |
| <b>Age</b>                          |                |        |             |          |       |
| >= 61                               | 10 109 (80.7%) | 12 520 |             |          |       |
| <= 40                               | 3 851 (86.1%)  | 4 471  | 1.48        | 1.31     | 1.68  |
| 41-60                               | 8 852 (86.2%)  | 10 268 | 1.49        | 1.36     | 1.64  |
| <b>Education</b>                    |                |        |             |          |       |
| Higher                              | 16 121 (86.0%) | 18 739 |             |          |       |
| Lower                               | 6 691 (78.5%)  | 8 520  | 0.59        | 0.54     | 0.65  |
| <b>Gender</b>                       |                |        |             |          |       |
| Woman                               | 16 698 (85.9%) | 19 433 |             |          |       |
| Man                                 | 6 006 (78.0%)  | 7 701  | 0.58        | 0.53     | 0.63  |
| Other/Undisclosed                   | 108 (86.4%)    | 125    | 1.04        | 0.53     | 2.04  |
| <b>Healthcare Experience</b>        |                |        |             |          |       |
| No                                  | 13 464 (80.5%) | 16 727 |             |          |       |
| Yes                                 | 9 348 (88.8%)  | 10 532 | 1.91        | 1.74     | 2.10  |
| <b>Cognitive Health</b>             |                |        |             |          |       |
| Average or above                    | 21 570 (84.2%) | 25 627 |             |          |       |
| Below average                       | 1 242 (76.1%)  | 1 632  | 0.60        | 0.51     | 0.70  |
| <b>Mental Health</b>                |                |        |             |          |       |
| Average or above                    | 19 867 (83.9%) | 23 666 |             |          |       |
| Below average                       | 2 945 (82.0%)  | 3 593  | 0.87        | 0.77     | 0.98  |
| <b>Illness Experience</b>           |                |        |             |          |       |
| No                                  | 13 636 (83.8%) | 16 271 |             |          |       |
| Yes                                 | 9 176 (83.5%)  | 10 988 | 0.98        | 0.90     | 1.07  |
| <b>Brain Disease Caregiver</b>      |                |        |             |          |       |
| No                                  | 11 975 (82.1%) | 14 577 |             |          |       |
| Yes                                 | 10 837 (85.5%) | 12 682 | 1.28        | 1.17     | 1.39  |
| <b>Brain Research Participation</b> |                |        |             |          |       |
| No                                  | 12 988 (83.9%) | 15 482 |             |          |       |
| Yes                                 | 9 824 (83.4%)  | 11 777 | 0.97        | 0.89     | 1.05  |
| <b>Relationship</b>                 |                |        |             |          |       |
| Not stable                          | 10 008 (83.2%) | 12 027 |             |          |       |
| Stable                              | 12 804 (84.1%) | 15 232 | 1.06        | 0.98     | 1.16  |

## 2.2 In your opinion, is it important to look after one's brain in *childhood*?

Table 13: Q2 Childhood

| Variable/Subgroup                   | Descriptive    |        | Inferential |          |       |
|-------------------------------------|----------------|--------|-------------|----------|-------|
|                                     | Positive       | N      | OR          | CI (99%) |       |
|                                     |                |        |             | Lower    | Upper |
| <b>Age</b>                          |                |        |             |          |       |
| >= 61                               | 11 791 (93.4%) | 12 626 |             |          |       |
| 41-60                               | 9 902 (96.2%)  | 10 297 | 1.78        | 1.51     | 2.09  |
| <= 40                               | 4 322 (96.4%)  | 4 484  | 1.89        | 1.51     | 2.37  |
| <b>Education</b>                    |                |        |             |          |       |
| Higher                              | 18 042 (95.8%) | 18 828 |             |          |       |
| Lower                               | 7 973 (92.9%)  | 8 579  | 0.57        | 0.50     | 0.66  |
| <b>Gender</b>                       |                |        |             |          |       |
| Woman                               | 18 679 (95.7%) | 19 518 |             |          |       |
| Man                                 | 7 217 (93.0%)  | 7 764  | 0.59        | 0.51     | 0.69  |
| Other/Undisclosed                   | 119 (95.2%)    | 125    | 0.89        | 0.30     | 2.63  |
| <b>Healthcare Experience</b>        |                |        |             |          |       |
| No                                  | 15 773 (93.7%) | 16 831 |             |          |       |
| Yes                                 | 10 242 (96.8%) | 10 576 | 2.06        | 1.74     | 2.43  |
| <b>Cognitive Health</b>             |                |        |             |          |       |
| Average or above                    | 24 506 (95.1%) | 25 760 |             |          |       |
| Below average                       | 1 509 (91.6%)  | 1 647  | 0.56        | 0.44     | 0.71  |
| <b>Mental Health</b>                |                |        |             |          |       |
| Average or above                    | 22 594 (94.9%) | 23 797 |             |          |       |
| Below average                       | 3 421 (94.8%)  | 3 610  | 0.96        | 0.78     | 1.19  |
| <b>Illness Experience</b>           |                |        |             |          |       |
| No                                  | 15 544 (95.1%) | 16 348 |             |          |       |
| Yes                                 | 10 471 (94.7%) | 11 059 | 0.92        | 0.80     | 1.06  |
| <b>Brain Disease Caregiver</b>      |                |        |             |          |       |
| No                                  | 13 912 (94.9%) | 14 662 |             |          |       |
| Yes                                 | 12 103 (95.0%) | 12 745 | 1.02        | 0.88     | 1.17  |
| <b>Brain Research Participation</b> |                |        |             |          |       |
| No                                  | 14 798 (95.1%) | 15 565 |             |          |       |
| Yes                                 | 11 217 (94.7%) | 11 842 | 0.93        | 0.81     | 1.07  |
| <b>Relationship</b>                 |                |        |             |          |       |
| Not stable                          | 11 503 (95.2%) | 12 085 |             |          |       |
| Stable                              | 14 512 (94.7%) | 15 322 | 0.91        | 0.79     | 1.05  |

### 2.3 In your opinion, is it important to look after one's brain in *adolescence*?

Table 14: Q2 Adolescence

| Variable/Subgroup                   | Descriptive    |        | Inferential |          |       |
|-------------------------------------|----------------|--------|-------------|----------|-------|
|                                     | Positive       | N      | OR          | CI (99%) |       |
|                                     |                |        |             | Lower    | Upper |
| <b>Age</b>                          |                |        |             |          |       |
| >= 61                               | 12 074 (95.5%) | 12 639 |             |          |       |
| 41-60                               | 10 019 (97.3%) | 10 293 | 1.71        | 1.41     | 2.08  |
| <= 40                               | 4 383 (97.9%)  | 4 479  | 2.14        | 1.60     | 2.85  |
| <b>Education</b>                    |                |        |             |          |       |
| Higher                              | 18 268 (97.0%) | 18 827 |             |          |       |
| Lower                               | 8 208 (95.6%)  | 8 584  | 0.67        | 0.56     | 0.80  |
| <b>Gender</b>                       |                |        |             |          |       |
| Woman                               | 18 923 (97.0%) | 19 512 |             |          |       |
| Man                                 | 7 433 (95.6%)  | 7 774  | 0.68        | 0.57     | 0.81  |
| Other/Undisclosed                   | 120 (96.0%)    | 125    | 0.75        | 0.23     | 2.44  |
| <b>Healthcare Experience</b>        |                |        |             |          |       |
| No                                  | 16 146 (95.9%) | 16 835 |             |          |       |
| Yes                                 | 10 330 (97.7%) | 10 576 | 1.79        | 1.48     | 2.18  |
| <b>Cognitive Health</b>             |                |        |             |          |       |
| Average or above                    | 24 934 (96.8%) | 25 766 |             |          |       |
| Below average                       | 1 542 (93.7%)  | 1 645  | 0.50        | 0.38     | 0.66  |
| <b>Mental Health</b>                |                |        |             |          |       |
| Average or above                    | 22 998 (96.6%) | 23 798 |             |          |       |
| Below average                       | 3 478 (96.3%)  | 3 613  | 0.90        | 0.70     | 1.14  |
| <b>Illness Experience</b>           |                |        |             |          |       |
| No                                  | 15 795 (96.6%) | 16 351 |             |          |       |
| Yes                                 | 10 681 (96.6%) | 11 060 | 0.99        | 0.83     | 1.18  |
| <b>Brain Disease Caregiver</b>      |                |        |             |          |       |
| No                                  | 14 168 (96.6%) | 14 668 |             |          |       |
| Yes                                 | 12 308 (96.6%) | 12 743 | 1.00        | 0.84     | 1.19  |
| <b>Brain Research Participation</b> |                |        |             |          |       |
| No                                  | 15 050 (96.7%) | 15 571 |             |          |       |
| Yes                                 | 11 426 (96.5%) | 11 840 | 0.96        | 0.80     | 1.14  |
| <b>Relationship</b>                 |                |        |             |          |       |
| Not stable                          | 11 704 (96.8%) | 12 087 |             |          |       |
| Stable                              | 14 772 (96.4%) | 15 324 | 0.88        | 0.74     | 1.04  |

2.4 In your opinion, is it important to look after one's brain in *young adulthood*?

Table 15: Q2 Young adulthood

| Variable/Subgroup                   | Descriptive    |        | Inferential |          |       |
|-------------------------------------|----------------|--------|-------------|----------|-------|
|                                     | Positive       | N      | OR          | CI (99%) |       |
|                                     |                |        |             | Lower    | Upper |
| <b>Age</b>                          |                |        |             |          |       |
| >= 61                               | 11 941 (94.5%) | 12 631 |             |          |       |
| <= 40                               | 4 276 (95.4%)  | 4 480  | 1.21        | 0.98     | 1.50  |
| 41-60                               | 9 925 (96.5%)  | 10 286 | 1.59        | 1.34     | 1.89  |
| <b>Education</b>                    |                |        |             |          |       |
| Higher                              | 17 946 (95.3%) | 18 822 |             |          |       |
| Lower                               | 8 196 (95.6%)  | 8 575  | 1.06        | 0.90     | 1.24  |
| <b>Gender</b>                       |                |        |             |          |       |
| Woman                               | 18 769 (96.2%) | 19 505 |             |          |       |
| Other/Undisclosed                   | 116 (92.8%)    | 125    | 0.51        | 0.21     | 1.24  |
| Man                                 | 7 257 (93.4%)  | 7 767  | 0.56        | 0.48     | 0.65  |
| <b>Healthcare Experience</b>        |                |        |             |          |       |
| No                                  | 15 927 (94.7%) | 16 823 |             |          |       |
| Yes                                 | 10 215 (96.6%) | 10 574 | 1.60        | 1.36     | 1.89  |
| <b>Cognitive Health</b>             |                |        |             |          |       |
| Average or above                    | 24 608 (95.6%) | 25 754 |             |          |       |
| Below average                       | 1 534 (93.4%)  | 1 643  | 0.66        | 0.50     | 0.86  |
| <b>Mental Health</b>                |                |        |             |          |       |
| Average or above                    | 22 725 (95.5%) | 23 787 |             |          |       |
| Below average                       | 3 417 (94.7%)  | 3 610  | 0.83        | 0.67     | 1.02  |
| <b>Illness Experience</b>           |                |        |             |          |       |
| No                                  | 15 563 (95.2%) | 16 347 |             |          |       |
| Yes                                 | 10 579 (95.7%) | 11 050 | 1.13        | 0.97     | 1.32  |
| <b>Brain Disease Caregiver</b>      |                |        |             |          |       |
| No                                  | 13 920 (95.0%) | 14 654 |             |          |       |
| Yes                                 | 12 222 (95.9%) | 12 743 | 1.24        | 1.06     | 1.44  |
| <b>Brain Research Participation</b> |                |        |             |          |       |
| No                                  | 14 847 (95.5%) | 15 546 |             |          |       |
| Yes                                 | 11 295 (95.3%) | 11 851 | 0.96        | 0.82     | 1.11  |
| <b>Relationship</b>                 |                |        |             |          |       |
| Not stable                          | 11 511 (95.3%) | 12 085 |             |          |       |
| Stable                              | 14 631 (95.6%) | 15 312 | 1.07        | 0.92     | 1.24  |



2.5 In your opinion, is it important to look after one's brain in *middle age*?

Table 16: Q2 Middle age

| Variable/Subgroup                   | Descriptive    |        | Inferential |          |       |
|-------------------------------------|----------------|--------|-------------|----------|-------|
|                                     | Positive       | N      | OR          | CI (99%) |       |
|                                     |                |        |             | Lower    | Upper |
| <b>Age</b>                          |                |        |             |          |       |
| >= 61                               | 12 064 (95.3%) | 12 659 |             |          |       |
| <= 40                               | 4 224 (94.3%)  | 4 478  | 0.82        | 0.67     | 1.00  |
| 41-60                               | 10 004 (97.2%) | 10 297 | 1.68        | 1.40     | 2.03  |
| <b>Education</b>                    |                |        |             |          |       |
| Higher                              | 18 078 (95.9%) | 18 844 |             |          |       |
| Lower                               | 8 214 (95.6%)  | 8 590  | 0.93        | 0.78     | 1.09  |
| <b>Gender</b>                       |                |        |             |          |       |
| Woman                               | 18 951 (97.0%) | 19 536 |             |          |       |
| Other/Undisclosed                   | 111 (88.8%)    | 125    | 0.24        | 0.12     | 0.51  |
| Man                                 | 7 230 (93.0%)  | 7 773  | 0.41        | 0.35     | 0.48  |
| <b>Healthcare Experience</b>        |                |        |             |          |       |
| No                                  | 16 036 (95.2%) | 16 842 |             |          |       |
| Yes                                 | 10 256 (96.8%) | 10 592 | 1.53        | 1.29     | 1.82  |
| <b>Cognitive Health</b>             |                |        |             |          |       |
| Average or above                    | 24 746 (96.0%) | 25 788 |             |          |       |
| Below average                       | 1 546 (93.9%)  | 1 646  | 0.65        | 0.49     | 0.86  |
| <b>Mental Health</b>                |                |        |             |          |       |
| Average or above                    | 22 877 (96.0%) | 23 818 |             |          |       |
| Below average                       | 3 415 (94.4%)  | 3 616  | 0.70        | 0.57     | 0.86  |
| <b>Illness Experience</b>           |                |        |             |          |       |
| No                                  | 15 651 (95.6%) | 16 365 |             |          |       |
| Yes                                 | 10 641 (96.1%) | 11 069 | 1.13        | 0.97     | 1.33  |
| <b>Brain Disease Caregiver</b>      |                |        |             |          |       |
| No                                  | 13 943 (95.1%) | 14 668 |             |          |       |
| Yes                                 | 12 349 (96.7%) | 12 766 | 1.54        | 1.31     | 1.81  |
| <b>Brain Research Participation</b> |                |        |             |          |       |
| No                                  | 14 907 (95.8%) | 15 567 |             |          |       |
| Yes                                 | 11 385 (95.9%) | 11 867 | 1.05        | 0.89     | 1.22  |
| <b>Relationship</b>                 |                |        |             |          |       |
| Not stable                          | 11 564 (95.6%) | 12 097 |             |          |       |
| Stable                              | 14 728 (96.0%) | 15 337 | 1.11        | 0.95     | 1.30  |

## 2.6 In your opinion, is it important to look after one's brain in *old age*?

Table 17: Q2 Old age

| Variable/Subgroup                   | Descriptive    |        | Inferential |          |       |
|-------------------------------------|----------------|--------|-------------|----------|-------|
|                                     | Positive       | N      | OR          | CI (99%) |       |
|                                     |                |        |             | Lower    | Upper |
| <b>Age</b>                          |                |        |             |          |       |
| >= 61                               | 12 193 (96.2%) | 12 675 |             |          |       |
| <= 40                               | 4 181 (93.3%)  | 4 482  | 0.55        | 0.45     | 0.67  |
| 41-60                               | 9 962 (96.8%)  | 10 294 | 1.19        | 0.98     | 1.43  |
| <b>Education</b>                    |                |        |             |          |       |
| Higher                              | 18 140 (96.2%) | 18 851 |             |          |       |
| Lower                               | 8 196 (95.3%)  | 8 600  | 0.80        | 0.67     | 0.94  |
| <b>Gender</b>                       |                |        |             |          |       |
| Woman                               | 18 970 (97.1%) | 19 545 |             |          |       |
| Other/Undisclosed                   | 115 (92.0%)    | 125    | 0.35        | 0.15     | 0.82  |
| Man                                 | 7 251 (93.2%)  | 7 781  | 0.41        | 0.35     | 0.49  |
| <b>Healthcare Experience</b>        |                |        |             |          |       |
| No                                  | 16 092 (95.4%) | 16 861 |             |          |       |
| Yes                                 | 10 244 (96.7%) | 10 590 | 1.41        | 1.19     | 1.68  |
| <b>Cognitive Health</b>             |                |        |             |          |       |
| Average or above                    | 24 789 (96.1%) | 25 807 |             |          |       |
| Below average                       | 1 547 (94.1%)  | 1 644  | 0.65        | 0.49     | 0.87  |
| <b>Mental Health</b>                |                |        |             |          |       |
| Average or above                    | 22 930 (96.2%) | 23 838 |             |          |       |
| Below average                       | 3 406 (94.3%)  | 3 613  | 0.65        | 0.53     | 0.80  |
| <b>Illness Experience</b>           |                |        |             |          |       |
| No                                  | 15 691 (95.8%) | 16 382 |             |          |       |
| Yes                                 | 10 645 (96.2%) | 11 069 | 1.11        | 0.94     | 1.30  |
| <b>Brain Disease Caregiver</b>      |                |        |             |          |       |
| No                                  | 13 994 (95.3%) | 14 680 |             |          |       |
| Yes                                 | 12 342 (96.6%) | 12 771 | 1.41        | 1.20     | 1.66  |
| <b>Brain Research Participation</b> |                |        |             |          |       |
| No                                  | 14 899 (95.6%) | 15 580 |             |          |       |
| Yes                                 | 11 437 (96.3%) | 11 871 | 1.20        | 1.02     | 1.42  |
| <b>Relationship</b>                 |                |        |             |          |       |
| Not stable                          | 11 564 (95.5%) | 12 106 |             |          |       |
| Stable                              | 14 772 (96.3%) | 15 345 | 1.21        | 1.03     | 1.41  |

### 3 Question 3

#### 3.1 I associate *alzheimer's* with the brain.

Table 18: Q3 Alzheimer's

| Variable/Subgroup                   | Descriptive    |        | Inferential |          |       |
|-------------------------------------|----------------|--------|-------------|----------|-------|
|                                     | Positive       | N      | OR          | CI (99%) |       |
|                                     |                |        |             | Lower    | Upper |
| <b>Age</b>                          |                |        |             |          |       |
| >= 61                               | 12 649 (99.3%) | 12 737 |             |          |       |
| <= 40                               | 4 391 (98.0%)  | 4 479  | 0.35        | 0.23     | 0.51  |
| 41-60                               | 10 248 (99.4%) | 10 314 | 1.08        | 0.71     | 1.65  |
| <b>Education</b>                    |                |        |             |          |       |
| Higher                              | 18 765 (99.3%) | 18 889 |             |          |       |
| Lower                               | 8 523 (98.6%)  | 8 641  | 0.48        | 0.34     | 0.67  |
| <b>Gender</b>                       |                |        |             |          |       |
| Woman                               | 19 467 (99.4%) | 19 589 |             |          |       |
| Man                                 | 7 695 (98.5%)  | 7 815  | 0.40        | 0.29     | 0.56  |
| Other/Undisclosed                   | 126 (100.0%)   | 126    |             |          |       |
| <b>Healthcare Experience</b>        |                |        |             |          |       |
| No                                  | 16 723 (98.9%) | 16 914 |             |          |       |
| Yes                                 | 10 565 (99.5%) | 10 616 | 2.37        | 1.57     | 3.56  |
| <b>Cognitive Health</b>             |                |        |             |          |       |
| Average or above                    | 25 654 (99.1%) | 25 876 |             |          |       |
| Below average                       | 1 634 (98.8%)  | 1 654  | 0.71        | 0.39     | 1.30  |
| <b>Mental Health</b>                |                |        |             |          |       |
| Average or above                    | 23 713 (99.2%) | 23 909 |             |          |       |
| Below average                       | 3 575 (98.7%)  | 3 621  | 0.64        | 0.42     | 0.98  |
| <b>Illness Experience</b>           |                |        |             |          |       |
| No                                  | 16 287 (99.3%) | 16 409 |             |          |       |
| Yes                                 | 11 001 (98.9%) | 11 121 | 0.69        | 0.49     | 0.96  |
| <b>Brain Disease Caregiver</b>      |                |        |             |          |       |
| No                                  | 14 545 (98.8%) | 14 721 |             |          |       |
| Yes                                 | 12 743 (99.5%) | 12 809 | 2.34        | 1.61     | 3.39  |
| <b>Brain Research Participation</b> |                |        |             |          |       |
| No                                  | 15 453 (98.9%) | 15 632 |             |          |       |
| Yes                                 | 11 835 (99.5%) | 11 898 | 2.18        | 1.49     | 3.18  |
| <b>Relationship</b>                 |                |        |             |          |       |
| Not stable                          | 11 992 (98.8%) | 12 137 |             |          |       |
| Stable                              | 15 296 (99.4%) | 15 393 | 1.91        | 1.36     | 2.68  |

### 3.2 I associate *schizophrenia* with the brain.

Table 19: Q3 Schizophrenia

| Variable/Subgroup                   | Descriptive    |        | Inferential |          |       |
|-------------------------------------|----------------|--------|-------------|----------|-------|
|                                     | Positive       | N      | OR          | CI (99%) |       |
|                                     |                |        |             | Lower    | Upper |
| <b>Age</b>                          |                |        |             |          |       |
| >= 61                               | 12 119 (95.1%) | 12 737 |             |          |       |
| <= 40                               | 4 315 (96.3%)  | 4 479  | 1.34        | 1.06     | 1.69  |
| 41-60                               | 9 968 (96.6%)  | 10 314 | 1.47        | 1.23     | 1.75  |
| <b>Education</b>                    |                |        |             |          |       |
| Higher                              | 18 235 (96.5%) | 18 889 |             |          |       |
| Lower                               | 8 167 (94.5%)  | 8 641  | 0.62        | 0.53     | 0.72  |
| <b>Gender</b>                       |                |        |             |          |       |
| Woman                               | 18 893 (96.4%) | 19 589 |             |          |       |
| Man                                 | 7 389 (94.5%)  | 7 815  | 0.64        | 0.54     | 0.75  |
| Other/Undisclosed                   | 120 (95.2%)    | 126    | 0.74        | 0.25     | 2.18  |
| <b>Healthcare Experience</b>        |                |        |             |          |       |
| No                                  | 16 119 (95.3%) | 16 914 |             |          |       |
| Yes                                 | 10 283 (96.9%) | 10 616 | 1.52        | 1.28     | 1.81  |
| <b>Cognitive Health</b>             |                |        |             |          |       |
| Average or above                    | 24 876 (96.1%) | 25 876 |             |          |       |
| Below average                       | 1 526 (92.3%)  | 1 654  | 0.48        | 0.37     | 0.62  |
| <b>Mental Health</b>                |                |        |             |          |       |
| Average or above                    | 22 929 (95.9%) | 23 909 |             |          |       |
| Below average                       | 3 473 (95.9%)  | 3 621  | 1.00        | 0.80     | 1.27  |
| <b>Illness Experience</b>           |                |        |             |          |       |
| No                                  | 15 781 (96.2%) | 16 409 |             |          |       |
| Yes                                 | 10 621 (95.5%) | 11 121 | 0.85        | 0.72     | 0.99  |
| <b>Brain Disease Caregiver</b>      |                |        |             |          |       |
| No                                  | 14 059 (95.5%) | 14 721 |             |          |       |
| Yes                                 | 12 343 (96.4%) | 12 809 | 1.25        | 1.06     | 1.46  |
| <b>Brain Research Participation</b> |                |        |             |          |       |
| No                                  | 14 906 (95.4%) | 15 632 |             |          |       |
| Yes                                 | 11 496 (96.6%) | 11 898 | 1.39        | 1.18     | 1.64  |
| <b>Relationship</b>                 |                |        |             |          |       |
| Not stable                          | 11 651 (96.0%) | 12 137 |             |          |       |
| Stable                              | 14 751 (95.8%) | 15 393 | 0.96        | 0.82     | 1.12  |

### 3.3 I associate *depression* with the brain.

Table 20: Q3 Depression

| Variable/Subgroup                   | Descriptive    |        | Inferential |          |       |
|-------------------------------------|----------------|--------|-------------|----------|-------|
|                                     | Positive       | N      | OR          | CI (99%) |       |
|                                     |                |        |             | Lower    | Upper |
| <b>Age</b>                          |                |        |             |          |       |
| >= 61                               | 11 998 (94.2%) | 12 737 |             |          |       |
| <= 40                               | 4 275 (95.4%)  | 4 479  | 1.29        | 1.05     | 1.59  |
| 41-60                               | 9 911 (96.1%)  | 10 314 | 1.51        | 1.29     | 1.78  |
| <b>Education</b>                    |                |        |             |          |       |
| Higher                              | 18 060 (95.6%) | 18 889 |             |          |       |
| Lower                               | 8 124 (94.0%)  | 8 641  | 0.72        | 0.62     | 0.84  |
| <b>Gender</b>                       |                |        |             |          |       |
| Woman                               | 18 731 (95.6%) | 19 589 |             |          |       |
| Man                                 | 7 332 (93.8%)  | 7 815  | 0.70        | 0.60     | 0.81  |
| Other/Undisclosed                   | 121 (96.0%)    | 126    | 1.11        | 0.34     | 3.61  |
| <b>Healthcare Experience</b>        |                |        |             |          |       |
| No                                  | 15 993 (94.6%) | 16 914 |             |          |       |
| Yes                                 | 10 191 (96.0%) | 10 616 | 1.38        | 1.18     | 1.61  |
| <b>Cognitive Health</b>             |                |        |             |          |       |
| Average or above                    | 24 636 (95.2%) | 25 876 |             |          |       |
| Below average                       | 1 548 (93.6%)  | 1 654  | 0.74        | 0.56     | 0.96  |
| <b>Mental Health</b>                |                |        |             |          |       |
| Average or above                    | 22 696 (94.9%) | 23 909 |             |          |       |
| Below average                       | 3 488 (96.3%)  | 3 621  | 1.40        | 1.10     | 1.78  |
| <b>Illness Experience</b>           |                |        |             |          |       |
| No                                  | 15 607 (95.1%) | 16 409 |             |          |       |
| Yes                                 | 10 577 (95.1%) | 11 121 | 1.00        | 0.86     | 1.16  |
| <b>Brain Disease Caregiver</b>      |                |        |             |          |       |
| No                                  | 13 929 (94.6%) | 14 721 |             |          |       |
| Yes                                 | 12 255 (95.7%) | 12 809 | 1.26        | 1.09     | 1.46  |
| <b>Brain Research Participation</b> |                |        |             |          |       |
| No                                  | 14 770 (94.5%) | 15 632 |             |          |       |
| Yes                                 | 11 414 (95.9%) | 11 898 | 1.38        | 1.18     | 1.60  |
| <b>Relationship</b>                 |                |        |             |          |       |
| Not stable                          | 11 549 (95.2%) | 12 137 |             |          |       |
| Stable                              | 14 635 (95.1%) | 15 393 | 0.98        | 0.85     | 1.14  |

### 3.4 I associate *bipolar* with the brain.

Table 21: Q3 Bipolar

| Variable/Subgroup                   | Descriptive    |        | Inferential |          |       |
|-------------------------------------|----------------|--------|-------------|----------|-------|
|                                     | Positive       | N      | OR          | CI (99%) |       |
|                                     |                |        |             | Lower    | Upper |
| <b>Age</b>                          |                |        |             |          |       |
| >= 61                               | 11 321 (88.9%) | 12 737 |             |          |       |
| <= 40                               | 4 202 (93.8%)  | 4 479  | 1.90        | 1.59     | 2.26  |
| 41-60                               | 9 753 (94.6%)  | 10 314 | 2.17        | 1.90     | 2.49  |
| <b>Education</b>                    |                |        |             |          |       |
| Higher                              | 17 762 (94.0%) | 18 889 |             |          |       |
| Lower                               | 7 514 (87.0%)  | 8 641  | 0.42        | 0.38     | 0.47  |
| <b>Gender</b>                       |                |        |             |          |       |
| Woman                               | 18 332 (93.6%) | 19 589 |             |          |       |
| Man                                 | 6 826 (87.3%)  | 7 815  | 0.47        | 0.42     | 0.53  |
| Other/Undisclosed                   | 118 (93.7%)    | 126    | 1.01        | 0.39     | 2.60  |
| <b>Healthcare Experience</b>        |                |        |             |          |       |
| No                                  | 15 219 (90.0%) | 16 914 |             |          |       |
| Yes                                 | 10 057 (94.7%) | 10 616 | 2.00        | 1.76     | 2.28  |
| <b>Cognitive Health</b>             |                |        |             |          |       |
| Average or above                    | 23 826 (92.1%) | 25 876 |             |          |       |
| Below average                       | 1 450 (87.7%)  | 1 654  | 0.61        | 0.50     | 0.75  |
| <b>Mental Health</b>                |                |        |             |          |       |
| Average or above                    | 21 896 (91.6%) | 23 909 |             |          |       |
| Below average                       | 3 380 (93.3%)  | 3 621  | 1.29        | 1.07     | 1.55  |
| <b>Illness Experience</b>           |                |        |             |          |       |
| No                                  | 15 072 (91.9%) | 16 409 |             |          |       |
| Yes                                 | 10 204 (91.8%) | 11 121 | 0.99        | 0.88     | 1.11  |
| <b>Brain Disease Caregiver</b>      |                |        |             |          |       |
| No                                  | 13 311 (90.4%) | 14 721 |             |          |       |
| Yes                                 | 11 965 (93.4%) | 12 809 | 1.50        | 1.34     | 1.69  |
| <b>Brain Research Participation</b> |                |        |             |          |       |
| No                                  | 14 149 (90.5%) | 15 632 |             |          |       |
| Yes                                 | 11 127 (93.5%) | 11 898 | 1.51        | 1.34     | 1.70  |
| <b>Relationship</b>                 |                |        |             |          |       |
| Not stable                          | 11 232 (92.5%) | 12 137 |             |          |       |
| Stable                              | 14 044 (91.2%) | 15 393 | 0.84        | 0.75     | 0.94  |

### 3.5 I associate *anxiety* with the brain.

Table 22: Q3 Anxiety

| Variable/Subgroup                   | Descriptive    |        | Inferential |          |       |
|-------------------------------------|----------------|--------|-------------|----------|-------|
|                                     | Positive       | N      | OR          | CI (99%) |       |
|                                     |                |        |             | Lower    | Upper |
| <b>Age</b>                          |                |        |             |          |       |
| >= 61                               | 11 336 (89.0%) | 12 737 |             |          |       |
| <= 40                               | 4 126 (92.1%)  | 4 479  | 1.44        | 1.23     | 1.70  |
| 41-60                               | 9 550 (92.6%)  | 10 314 | 1.54        | 1.37     | 1.74  |
| <b>Education</b>                    |                |        |             |          |       |
| Higher                              | 17 310 (91.6%) | 18 889 |             |          |       |
| Lower                               | 7 702 (89.1%)  | 8 641  | 0.75        | 0.67     | 0.84  |
| <b>Gender</b>                       |                |        |             |          |       |
| Woman                               | 17 905 (91.4%) | 19 589 |             |          |       |
| Man                                 | 6 987 (89.4%)  | 7 815  | 0.79        | 0.71     | 0.89  |
| Other/Undisclosed                   | 120 (95.2%)    | 126    | 1.88        | 0.64     | 5.55  |
| <b>Healthcare Experience</b>        |                |        |             |          |       |
| No                                  | 15 250 (90.2%) | 16 914 |             |          |       |
| Yes                                 | 9 762 (92.0%)  | 10 616 | 1.25        | 1.11     | 1.40  |
| <b>Cognitive Health</b>             |                |        |             |          |       |
| Average or above                    | 23 536 (91.0%) | 25 876 |             |          |       |
| Below average                       | 1 476 (89.2%)  | 1 654  | 0.82        | 0.67     | 1.02  |
| <b>Mental Health</b>                |                |        |             |          |       |
| Average or above                    | 21 627 (90.5%) | 23 909 |             |          |       |
| Below average                       | 3 385 (93.5%)  | 3 621  | 1.51        | 1.26     | 1.82  |
| <b>Illness Experience</b>           |                |        |             |          |       |
| No                                  | 14 870 (90.6%) | 16 409 |             |          |       |
| Yes                                 | 10 142 (91.2%) | 11 121 | 1.07        | 0.96     | 1.20  |
| <b>Brain Disease Caregiver</b>      |                |        |             |          |       |
| No                                  | 13 266 (90.1%) | 14 721 |             |          |       |
| Yes                                 | 11 746 (91.7%) | 12 809 | 1.21        | 1.09     | 1.35  |
| <b>Brain Research Participation</b> |                |        |             |          |       |
| No                                  | 14 048 (89.9%) | 15 632 |             |          |       |
| Yes                                 | 10 964 (92.1%) | 11 898 | 1.32        | 1.18     | 1.48  |
| <b>Relationship</b>                 |                |        |             |          |       |
| Not stable                          | 11 027 (90.9%) | 12 137 |             |          |       |
| Stable                              | 13 985 (90.9%) | 15 393 | 1.00        | 0.90     | 1.11  |

### 3.6 I associate *addiction* with the brain.

Table 23: Q3 Addiction

| Variable/Subgroup                   | Descriptive    |        | Inferential |          |       |
|-------------------------------------|----------------|--------|-------------|----------|-------|
|                                     | Positive       | N      | OR          | CI (99%) |       |
|                                     |                |        |             | Lower    | Upper |
| <b>Age</b>                          |                |        |             |          |       |
| >= 61                               | 11 025 (86.6%) | 12 737 |             |          |       |
| 41-60                               | 9 263 (89.8%)  | 10 314 | 1.37        | 1.23     | 1.52  |
| <= 40                               | 4 059 (90.6%)  | 4 479  | 1.50        | 1.29     | 1.74  |
| <b>Education</b>                    |                |        |             |          |       |
| Higher                              | 17 005 (90.0%) | 18 889 |             |          |       |
| Lower                               | 7 342 (85.0%)  | 8 641  | 0.63        | 0.57     | 0.69  |
| <b>Gender</b>                       |                |        |             |          |       |
| Woman                               | 17 634 (90.0%) | 19 589 |             |          |       |
| Man                                 | 6 599 (84.4%)  | 7 815  | 0.60        | 0.54     | 0.67  |
| Other/Undisclosed                   | 114 (90.5%)    | 126    | 1.05        | 0.48     | 2.31  |
| <b>Healthcare Experience</b>        |                |        |             |          |       |
| No                                  | 14 542 (86.0%) | 16 914 |             |          |       |
| Yes                                 | 9 805 (92.4%)  | 10 616 | 1.97        | 1.77     | 2.20  |
| <b>Cognitive Health</b>             |                |        |             |          |       |
| Average or above                    | 22 952 (88.7%) | 25 876 |             |          |       |
| Below average                       | 1 395 (84.3%)  | 1 654  | 0.69        | 0.57     | 0.82  |
| <b>Mental Health</b>                |                |        |             |          |       |
| Average or above                    | 21 109 (88.3%) | 23 909 |             |          |       |
| Below average                       | 3 238 (89.4%)  | 3 621  | 1.12        | 0.97     | 1.30  |
| <b>Illness Experience</b>           |                |        |             |          |       |
| No                                  | 14 492 (88.3%) | 16 409 |             |          |       |
| Yes                                 | 9 855 (88.6%)  | 11 121 | 1.03        | 0.93     | 1.14  |
| <b>Brain Disease Caregiver</b>      |                |        |             |          |       |
| No                                  | 12 859 (87.4%) | 14 721 |             |          |       |
| Yes                                 | 11 488 (89.7%) | 12 809 | 1.26        | 1.14     | 1.39  |
| <b>Brain Research Participation</b> |                |        |             |          |       |
| No                                  | 13 645 (87.3%) | 15 632 |             |          |       |
| Yes                                 | 10 702 (89.9%) | 11 898 | 1.30        | 1.18     | 1.44  |
| <b>Relationship</b>                 |                |        |             |          |       |
| Not stable                          | 10 825 (89.2%) | 12 137 |             |          |       |
| Stable                              | 13 522 (87.8%) | 15 393 | 0.88        | 0.79     | 0.97  |



3.7 I associate *stroke* with the brain.

Table 24: Q3 Stroke

| Variable/Subgroup                   | Descriptive    |        | Inferential |          |       |
|-------------------------------------|----------------|--------|-------------|----------|-------|
|                                     | Positive       | N      | OR          | CI (99%) |       |
|                                     |                |        |             | Lower    | Upper |
| <b>Age</b>                          |                |        |             |          |       |
| >= 61                               | 11 174 (87.7%) | 12 737 |             |          |       |
| <= 40                               | 3 785 (84.5%)  | 4 479  | 0.76        | 0.67     | 0.87  |
| 41-60                               | 9 206 (89.3%)  | 10 314 | 1.16        | 1.04     | 1.29  |
| <b>Education</b>                    |                |        |             |          |       |
| Higher                              | 16 671 (88.3%) | 18 889 |             |          |       |
| Lower                               | 7 494 (86.7%)  | 8 641  | 0.87        | 0.79     | 0.96  |
| <b>Gender</b>                       |                |        |             |          |       |
| Woman                               | 17 612 (89.9%) | 19 589 |             |          |       |
| Man                                 | 6 440 (82.4%)  | 7 815  | 0.53        | 0.48     | 0.58  |
| Other/Undisclosed                   | 113 (89.7%)    | 126    | 0.98        | 0.46     | 2.08  |
| <b>Healthcare Experience</b>        |                |        |             |          |       |
| No                                  | 14 292 (84.5%) | 16 914 |             |          |       |
| Yes                                 | 9 873 (93.0%)  | 10 616 | 2.44        | 2.18     | 2.73  |
| <b>Cognitive Health</b>             |                |        |             |          |       |
| Average or above                    | 22 748 (87.9%) | 25 876 |             |          |       |
| Below average                       | 1 417 (85.7%)  | 1 654  | 0.82        | 0.68     | 0.99  |
| <b>Mental Health</b>                |                |        |             |          |       |
| Average or above                    | 21 018 (87.9%) | 23 909 |             |          |       |
| Below average                       | 3 147 (86.9%)  | 3 621  | 0.91        | 0.80     | 1.05  |
| <b>Illness Experience</b>           |                |        |             |          |       |
| No                                  | 14 228 (86.7%) | 16 409 |             |          |       |
| Yes                                 | 9 937 (89.4%)  | 11 121 | 1.29        | 1.17     | 1.42  |
| <b>Brain Disease Caregiver</b>      |                |        |             |          |       |
| No                                  | 12 575 (85.4%) | 14 721 |             |          |       |
| Yes                                 | 11 590 (90.5%) | 12 809 | 1.62        | 1.47     | 1.79  |
| <b>Brain Research Participation</b> |                |        |             |          |       |
| No                                  | 13 555 (86.7%) | 15 632 |             |          |       |
| Yes                                 | 10 610 (89.2%) | 11 898 | 1.26        | 1.15     | 1.39  |
| <b>Relationship</b>                 |                |        |             |          |       |
| Not stable                          | 10 537 (86.8%) | 12 137 |             |          |       |
| Stable                              | 13 628 (88.5%) | 15 393 | 1.17        | 1.07     | 1.29  |

### 3.8 I associate *parkinson's* with the brain.

Table 25: Q3 Parkinson's

| Variable/Subgroup                   | Descriptive    |        | Inferential |          |       |
|-------------------------------------|----------------|--------|-------------|----------|-------|
|                                     | Positive       | N      | OR          | CI (99%) |       |
|                                     |                |        |             | Lower    | Upper |
| <b>Age</b>                          |                |        |             |          |       |
| >= 61                               | 10 961 (86.1%) | 12 737 |             |          |       |
| <= 40                               | 3 727 (83.2%)  | 4 479  | 0.80        | 0.71     | 0.91  |
| 41-60                               | 9 021 (87.5%)  | 10 314 | 1.13        | 1.02     | 1.25  |
| <b>Education</b>                    |                |        |             |          |       |
| Higher                              | 16 612 (87.9%) | 18 889 |             |          |       |
| Lower                               | 7 097 (82.1%)  | 8 641  | 0.63        | 0.57     | 0.69  |
| <b>Gender</b>                       |                |        |             |          |       |
| Woman                               | 17 017 (86.9%) | 19 589 |             |          |       |
| Man                                 | 6 585 (84.3%)  | 7 815  | 0.81        | 0.73     | 0.89  |
| Other/Undisclosed                   | 107 (84.9%)    | 126    | 0.85        | 0.45     | 1.62  |
| <b>Healthcare Experience</b>        |                |        |             |          |       |
| No                                  | 14 054 (83.1%) | 16 914 |             |          |       |
| Yes                                 | 9 655 (90.9%)  | 10 616 | 2.04        | 1.85     | 2.26  |
| <b>Cognitive Health</b>             |                |        |             |          |       |
| Average or above                    | 22 337 (86.3%) | 25 876 |             |          |       |
| Below average                       | 1 372 (83.0%)  | 1 654  | 0.77        | 0.65     | 0.92  |
| <b>Mental Health</b>                |                |        |             |          |       |
| Average or above                    | 20 658 (86.4%) | 23 909 |             |          |       |
| Below average                       | 3 051 (84.3%)  | 3 621  | 0.84        | 0.74     | 0.96  |
| <b>Illness Experience</b>           |                |        |             |          |       |
| No                                  | 14 066 (85.7%) | 16 409 |             |          |       |
| Yes                                 | 9 643 (86.7%)  | 11 121 | 1.09        | 0.99     | 1.19  |
| <b>Brain Disease Caregiver</b>      |                |        |             |          |       |
| No                                  | 12 381 (84.1%) | 14 721 |             |          |       |
| Yes                                 | 11 328 (88.4%) | 12 809 | 1.45        | 1.32     | 1.58  |
| <b>Brain Research Participation</b> |                |        |             |          |       |
| No                                  | 13 190 (84.4%) | 15 632 |             |          |       |
| Yes                                 | 10 519 (88.4%) | 11 898 | 1.41        | 1.29     | 1.55  |
| <b>Relationship</b>                 |                |        |             |          |       |
| Not stable                          | 10 314 (85.0%) | 12 137 |             |          |       |
| Stable                              | 13 395 (87.0%) | 15 393 | 1.18        | 1.08     | 1.30  |

### 3.9 I associate *migraine* with the brain.

Table 26: Q3 Migraine

| Variable/Subgroup                   | Descriptive    |        | Inferential |          |       |
|-------------------------------------|----------------|--------|-------------|----------|-------|
|                                     | Positive       | N      | OR          | CI (99%) |       |
|                                     |                |        |             | Lower    | Upper |
| <b>Age</b>                          |                |        |             |          |       |
| >= 61                               | 9 880 (77.6%)  | 12 737 |             |          |       |
| 41-60                               | 8 870 (86.0%)  | 10 314 | 1.78        | 1.62     | 1.95  |
| <= 40                               | 3 954 (88.3%)  | 4 479  | 2.18        | 1.91     | 2.48  |
| <b>Education</b>                    |                |        |             |          |       |
| Higher                              | 15 915 (84.3%) | 18 889 |             |          |       |
| Lower                               | 6 789 (78.6%)  | 8 641  | 0.69        | 0.63     | 0.75  |
| <b>Gender</b>                       |                |        |             |          |       |
| Woman                               | 16 366 (83.5%) | 19 589 |             |          |       |
| Man                                 | 6 232 (79.7%)  | 7 815  | 0.78        | 0.71     | 0.85  |
| Other/Undisclosed                   | 106 (84.1%)    | 126    | 1.04        | 0.56     | 1.96  |
| <b>Healthcare Experience</b>        |                |        |             |          |       |
| No                                  | 13 446 (79.5%) | 16 914 |             |          |       |
| Yes                                 | 9 258 (87.2%)  | 10 616 | 1.76        | 1.61     | 1.92  |
| <b>Cognitive Health</b>             |                |        |             |          |       |
| Average or above                    | 21 407 (82.7%) | 25 876 |             |          |       |
| Below average                       | 1 297 (78.4%)  | 1 654  | 0.76        | 0.65     | 0.89  |
| <b>Mental Health</b>                |                |        |             |          |       |
| Average or above                    | 19 708 (82.4%) | 23 909 |             |          |       |
| Below average                       | 2 996 (82.7%)  | 3 621  | 1.02        | 0.90     | 1.15  |
| <b>Illness Experience</b>           |                |        |             |          |       |
| No                                  | 13 431 (81.9%) | 16 409 |             |          |       |
| Yes                                 | 9 273 (83.4%)  | 11 121 | 1.11        | 1.02     | 1.21  |
| <b>Brain Disease Caregiver</b>      |                |        |             |          |       |
| No                                  | 11 912 (80.9%) | 14 721 |             |          |       |
| Yes                                 | 10 792 (84.3%) | 12 809 | 1.26        | 1.16     | 1.37  |
| <b>Brain Research Participation</b> |                |        |             |          |       |
| No                                  | 12 796 (81.9%) | 15 632 |             |          |       |
| Yes                                 | 9 908 (83.3%)  | 11 898 | 1.10        | 1.02     | 1.20  |
| <b>Relationship</b>                 |                |        |             |          |       |
| Not stable                          | 9 976 (82.2%)  | 12 137 |             |          |       |
| Stable                              | 12 728 (82.7%) | 15 393 | 1.03        | 0.95     | 1.12  |

3.10 I associate *cancer* with the brain.

Table 27: Q3 Cancer

| Variable/Subgroup                   | Descriptive   |        | Inferential |          |       |
|-------------------------------------|---------------|--------|-------------|----------|-------|
|                                     | Positive      | N      | OR          | CI (99%) |       |
|                                     |               |        |             | Lower    | Upper |
| <b>Age</b>                          |               |        |             |          |       |
| >= 61                               | 3 627 (28.5%) | 12 737 |             |          |       |
| 41-60                               | 3 513 (34.1%) | 10 314 | 1.30        | 1.21     | 1.40  |
| <= 40                               | 1 709 (38.2%) | 4 479  | 1.55        | 1.41     | 1.70  |
| <b>Education</b>                    |               |        |             |          |       |
| Higher                              | 6 457 (34.2%) | 18 889 |             |          |       |
| Lower                               | 2 392 (27.7%) | 8 641  | 0.74        | 0.68     | 0.79  |
| <b>Gender</b>                       |               |        |             |          |       |
| Woman                               | 6 623 (33.8%) | 19 589 |             |          |       |
| Man                                 | 2 179 (27.9%) | 7 815  | 0.76        | 0.70     | 0.82  |
| Other/Undisclosed                   | 47 (37.3%)    | 126    | 1.16        | 0.72     | 1.88  |
| <b>Healthcare Experience</b>        |               |        |             |          |       |
| No                                  | 4 634 (27.4%) | 16 914 |             |          |       |
| Yes                                 | 4 215 (39.7%) | 10 616 | 1.74        | 1.63     | 1.87  |
| <b>Cognitive Health</b>             |               |        |             |          |       |
| Average or above                    | 8 381 (32.4%) | 25 876 |             |          |       |
| Below average                       | 468 (28.3%)   | 1 654  | 0.82        | 0.71     | 0.95  |
| <b>Mental Health</b>                |               |        |             |          |       |
| Average or above                    | 7 625 (31.9%) | 23 909 |             |          |       |
| Below average                       | 1 224 (33.8%) | 3 621  | 1.09        | 0.99     | 1.20  |
| <b>Illness Experience</b>           |               |        |             |          |       |
| No                                  | 5 099 (31.1%) | 16 409 |             |          |       |
| Yes                                 | 3 750 (33.7%) | 11 121 | 1.13        | 1.05     | 1.21  |
| <b>Brain Disease Caregiver</b>      |               |        |             |          |       |
| No                                  | 4 390 (29.8%) | 14 721 |             |          |       |
| Yes                                 | 4 459 (34.8%) | 12 809 | 1.26        | 1.18     | 1.34  |
| <b>Brain Research Participation</b> |               |        |             |          |       |
| No                                  | 4 801 (30.7%) | 15 632 |             |          |       |
| Yes                                 | 4 048 (34.0%) | 11 898 | 1.16        | 1.09     | 1.24  |
| <b>Relationship</b>                 |               |        |             |          |       |
| Not stable                          | 3 892 (32.1%) | 12 137 |             |          |       |
| Stable                              | 4 957 (32.2%) | 15 393 | 1.01        | 0.94     | 1.08  |

### 3.11 I associate *hypertension* with the brain.

Table 28: Q3 Hypertension

| Variable/Subgroup                   | Descriptive   |        | Inferential |          |       |
|-------------------------------------|---------------|--------|-------------|----------|-------|
|                                     | Positive      | N      | OR          | CI (99%) |       |
|                                     |               |        |             | Lower    | Upper |
| <b>Age</b>                          |               |        |             |          |       |
| >= 61                               | 4 353 (34.2%) | 12 737 |             |          |       |
| <= 40                               | 1 136 (25.4%) | 4 479  | 0.65        | 0.59     | 0.72  |
| 41-60                               | 3 247 (31.5%) | 10 314 | 0.88        | 0.82     | 0.95  |
| <b>Education</b>                    |               |        |             |          |       |
| Higher                              | 6 326 (33.5%) | 18 889 |             |          |       |
| Lower                               | 2 410 (27.9%) | 8 641  | 0.77        | 0.71     | 0.83  |
| <b>Gender</b>                       |               |        |             |          |       |
| Woman                               | 6 610 (33.7%) | 19 589 |             |          |       |
| Man                                 | 2 074 (26.5%) | 7 815  | 0.71        | 0.66     | 0.77  |
| Other/Undisclosed                   | 52 (41.3%)    | 126    | 1.38        | 0.86     | 2.20  |
| <b>Healthcare Experience</b>        |               |        |             |          |       |
| No                                  | 4 214 (24.9%) | 16 914 |             |          |       |
| Yes                                 | 4 522 (42.6%) | 10 616 | 2.24        | 2.09     | 2.39  |
| <b>Cognitive Health</b>             |               |        |             |          |       |
| Average or above                    | 8 247 (31.9%) | 25 876 |             |          |       |
| Below average                       | 489 (29.6%)   | 1 654  | 0.90        | 0.78     | 1.04  |
| <b>Mental Health</b>                |               |        |             |          |       |
| Average or above                    | 7 713 (32.3%) | 23 909 |             |          |       |
| Below average                       | 1 023 (28.3%) | 3 621  | 0.83        | 0.75     | 0.92  |
| <b>Illness Experience</b>           |               |        |             |          |       |
| No                                  | 4 940 (30.1%) | 16 409 |             |          |       |
| Yes                                 | 3 796 (34.1%) | 11 121 | 1.20        | 1.12     | 1.29  |
| <b>Brain Disease Caregiver</b>      |               |        |             |          |       |
| No                                  | 4 044 (27.5%) | 14 721 |             |          |       |
| Yes                                 | 4 692 (36.6%) | 12 809 | 1.53        | 1.43     | 1.63  |
| <b>Brain Research Participation</b> |               |        |             |          |       |
| No                                  | 4 662 (29.8%) | 15 632 |             |          |       |
| Yes                                 | 4 074 (34.2%) | 11 898 | 1.23        | 1.15     | 1.31  |
| <b>Relationship</b>                 |               |        |             |          |       |
| Not stable                          | 3 738 (30.8%) | 12 137 |             |          |       |
| Stable                              | 4 998 (32.5%) | 15 393 | 1.08        | 1.01     | 1.16  |

3.12 I associate *diabetes* with the brain.

Table 29: Q3 Diabetes

| Variable/Subgroup                   | Descriptive   |        | Inferential |          |       |
|-------------------------------------|---------------|--------|-------------|----------|-------|
|                                     | Positive      | N      | OR          | CI (99%) |       |
|                                     |               |        |             | Lower    | Upper |
| <b>Age</b>                          |               |        |             |          |       |
| >= 61                               | 1 943 (15.3%) | 12 737 |             |          |       |
| <= 40                               | 658 (14.7%)   | 4 479  | 0.96        | 0.84     | 1.09  |
| 41-60                               | 1 775 (17.2%) | 10 314 | 1.15        | 1.05     | 1.27  |
| <b>Education</b>                    |               |        |             |          |       |
| Higher                              | 3 271 (17.3%) | 18 889 |             |          |       |
| Lower                               | 1 105 (12.8%) | 8 641  | 0.70        | 0.64     | 0.77  |
| <b>Gender</b>                       |               |        |             |          |       |
| Woman                               | 3 265 (16.7%) | 19 589 |             |          |       |
| Man                                 | 1 079 (13.8%) | 7 815  | 0.80        | 0.73     | 0.88  |
| Other/Undisclosed                   | 32 (25.4%)    | 126    | 1.70        | 1.00     | 2.89  |
| <b>Healthcare Experience</b>        |               |        |             |          |       |
| No                                  | 1 793 (10.6%) | 16 914 |             |          |       |
| Yes                                 | 2 583 (24.3%) | 10 616 | 2.71        | 2.49     | 2.96  |
| <b>Cognitive Health</b>             |               |        |             |          |       |
| Average or above                    | 4 117 (15.9%) | 25 876 |             |          |       |
| Below average                       | 259 (15.7%)   | 1 654  | 0.98        | 0.82     | 1.17  |
| <b>Mental Health</b>                |               |        |             |          |       |
| Average or above                    | 3 875 (16.2%) | 23 909 |             |          |       |
| Below average                       | 501 (13.8%)   | 3 621  | 0.83        | 0.73     | 0.95  |
| <b>Illness Experience</b>           |               |        |             |          |       |
| No                                  | 2 405 (14.7%) | 16 409 |             |          |       |
| Yes                                 | 1 971 (17.7%) | 11 121 | 1.25        | 1.15     | 1.37  |
| <b>Brain Disease Caregiver</b>      |               |        |             |          |       |
| No                                  | 1 995 (13.6%) | 14 721 |             |          |       |
| Yes                                 | 2 381 (18.6%) | 12 809 | 1.46        | 1.34     | 1.59  |
| <b>Brain Research Participation</b> |               |        |             |          |       |
| No                                  | 2 320 (14.8%) | 15 632 |             |          |       |
| Yes                                 | 2 056 (17.3%) | 11 898 | 1.20        | 1.10     | 1.31  |
| <b>Relationship</b>                 |               |        |             |          |       |
| Not stable                          | 1 934 (15.9%) | 12 137 |             |          |       |
| Stable                              | 2 442 (15.9%) | 15 393 | 0.99        | 0.91     | 1.08  |

3.13 I associate *arthritis* with the brain.

Table 30: Q3 Arthritis

| Variable/Subgroup                   | Descriptive  |        | Inferential |          |       |
|-------------------------------------|--------------|--------|-------------|----------|-------|
|                                     | Positive     | N      | OR          | CI (99%) |       |
|                                     |              |        |             | Lower    | Upper |
| <b>Age</b>                          |              |        |             |          |       |
| >= 61                               | 578 (4.5%)   | 12 737 |             |          |       |
| <= 40                               | 205 (4.6%)   | 4 479  | 1.01        | 0.81     | 1.25  |
| 41-60                               | 535 (5.2%)   | 10 314 | 1.15        | 0.98     | 1.35  |
| <b>Education</b>                    |              |        |             |          |       |
| Higher                              | 920 (4.9%)   | 18 889 |             |          |       |
| Lower                               | 398 (4.6%)   | 8 641  | 0.94        | 0.80     | 1.11  |
| <b>Gender</b>                       |              |        |             |          |       |
| Woman                               | 1 005 (5.1%) | 19 589 |             |          |       |
| Man                                 | 305 (3.9%)   | 7 815  | 0.75        | 0.63     | 0.89  |
| Other/Undisclosed                   | 8 (6.3%)     | 126    | 1.25        | 0.49     | 3.23  |
| <b>Healthcare Experience</b>        |              |        |             |          |       |
| No                                  | 577 (3.4%)   | 16 914 |             |          |       |
| Yes                                 | 741 (7.0%)   | 10 616 | 2.12        | 1.83     | 2.46  |
| <b>Cognitive Health</b>             |              |        |             |          |       |
| Average or above                    | 1 216 (4.7%) | 25 876 |             |          |       |
| Below average                       | 102 (6.2%)   | 1 654  | 1.33        | 1.01     | 1.75  |
| <b>Mental Health</b>                |              |        |             |          |       |
| Average or above                    | 1 151 (4.8%) | 23 909 |             |          |       |
| Below average                       | 167 (4.6%)   | 3 621  | 0.96        | 0.77     | 1.19  |
| <b>Illness Experience</b>           |              |        |             |          |       |
| No                                  | 641 (3.9%)   | 16 409 |             |          |       |
| Yes                                 | 677 (6.1%)   | 11 121 | 1.59        | 1.38     | 1.84  |
| <b>Brain Disease Caregiver</b>      |              |        |             |          |       |
| No                                  | 622 (4.2%)   | 14 721 |             |          |       |
| Yes                                 | 696 (5.4%)   | 12 809 | 1.30        | 1.13     | 1.51  |
| <b>Brain Research Participation</b> |              |        |             |          |       |
| No                                  | 737 (4.7%)   | 15 632 |             |          |       |
| Yes                                 | 581 (4.9%)   | 11 898 | 1.04        | 0.90     | 1.20  |
| <b>Relationship</b>                 |              |        |             |          |       |
| Not stable                          | 631 (5.2%)   | 12 137 |             |          |       |
| Stable                              | 687 (4.5%)   | 15 393 | 0.85        | 0.74     | 0.99  |

->
